# Supplementary material for: Variants in the DDX6-CXCR5 autoimmune disease risk locus influence the regulatory network in immune cells and salivary gland
Source: bioRxiv preprint, doi:10.1101/2023.10.05.561076, version 1 (2023-10-06)
Supplement: Supplemental Datasets [file 561076_file05.pdf]

### **SUPPLEMENTARY DATA TABLE**

**Supplemental Data 1:** Meta-analysis of SjD GWAS and Immunochip data in DDX6-CXCR5 locus (Dataset 1).

**Supplemental Data 2:** Meta-analysis of SLE data in DDX6-CXCR5 locus (Dataset 2).

**Supplemental Data 3:** Meta-analysis of SjD and SLE data in DDX6-CXCR5 locus (Merged Datasets 1 and 2).

**Supplemental Data 4:** Bayesian analysis of SjD GWAS and Immunochip data in DDX6-CXCR5 locus (Dataset 1).

**Supplemental Data 5:** Bayesian analysis of SjD Immunochip data in DDX6-CXCR5 locus (Dataset 3).

**Supplemental Data 6:** Bayesian analysis of SLE Immunochip data in DDX6-CXCR5 locus (Dataset 4).

**Supplemental Data 7:** Bayesian analysis of merged SjD and SLE Immunochip data in DDX6-CXCR5 locus (Merged Datasets 3 and 4) with bioinformatic analysis for the top 100 SNPs (RegulomeDB Score, Haploreg epimarks, and publications)

**Supplemental Data 1: Meta-analysis of Sjd GWAS and Immonochip data in DDX6-CXCR5 locus (Da**

| SNP          | CHR | BP(GRCh37/hg19) | A1 | A2 | Zscore | P.value  | Direction | HetISq | HetChiSq | HetDf | HetPVal |
|--------------|-----|-----------------|----|----|--------|----------|-----------|--------|----------|-------|---------|
| rs7481819    | 11  | 118745278       | C  | T  | -5.996 | 2.02E-09 | --        | 0      | 0.547    | 1     | 0.4593  |
| rs7123726    | 11  | 118694547       | C  | T  | -5.933 | 2.98E-09 | --        | 0      | 0.133    | 1     | 0.7154  |
| rs11217040   | 11  | 118680648       | A  | C  | -5.923 | 3.17E-09 | --        | 0      | 0.458    | 1     | 0.4987  |
| rs4936444    | 11  | 118743338       | T  | C  | -5.914 | 3.35E-09 | --        | 0      | 0.752    | 1     | 0.3859  |
| rs7481797    | 11  | 118745243       | A  | G  | -5.914 | 3.35E-09 | --        | 0      | 0.62     | 1     | 0.4312  |
| rs11217041   | 11  | 118682350       | G  | A  | -5.884 | 4.01E-09 | --        | 0      | 0.537    | 1     | 0.4638  |
| rs11217042   | 11  | 118682528       | A  | G  | -5.884 | 4.01E-09 | --        | 0      | 0.537    | 1     | 0.4638  |
| rs7942535    | 11  | 118681464       | C  | T  | -5.884 | 4.01E-09 | --        | 0      | 0.537    | 1     | 0.4637  |
| rs17122453   | 11  | 118683564       | A  | G  | -5.874 | 4.25E-09 | --        | 0      | 0.566    | 1     | 0.452   |
| rs73005426   | 11  | 118681083       | G  | A  | -5.866 | 4.46E-09 | --        | 0      | 0.55     | 1     | 0.4582  |
| rs6421571    | 11  | 118743772       | T  | C  | -5.842 | 5.16E-09 | --        | -198.1 | 1.006    | 1     | 0.3158  |
| rs4938573    | 11  | 118741842       | C  | T  | -5.799 | 6.69E-09 | --        | -197.5 | 1.008    | 1     | 0.3153  |
| rs12365699   | 11  | 118743286       | A  | G  | -5.791 | 7.01E-09 | --        | 0      | 0.704    | 1     | 0.4015  |
| rs7117261    | 11  | 118741157       | T  | C  | -5.768 | 8.01E-09 | --        | 0      | 0.923    | 1     | 0.3367  |
| rs74541740   | 11  | 118742800       | A  | G  | -5.767 | 8.07E-09 | --        | -182.6 | 1.062    | 1     | 0.3028  |
| rs10790275   | 11  | 118745884       | G  | C  | -5.757 | 8.56E-09 | --        | 0      | 0.531    | 1     | 0.4662  |
| rs10790268   | 11  | 118729391       | A  | G  | -5.756 | 8.62E-09 | --        | 0      | 0.948    | 1     | 0.3303  |
| rs7951740    | 11  | 118740418       | G  | C  | -5.755 | 8.65E-09 | --        | 0      | 0.92     | 1     | 0.3374  |
| rs9736016    | 11  | 118724894       | A  | T  | -5.736 | 9.70E-09 | --        | 0      | 0.613    | 1     | 0.4335  |
| rs715412     | 11  | 118684610       | A  | G  | -5.736 | 9.72E-09 | --        | 0      | 0.454    | 1     | 0.5004  |
| rs10790269   | 11  | 118729456       | C  | T  | -5.728 | 1.02E-08 | --        | 0      | 0.979    | 1     | 0.3224  |
| rs11217032   | 11  | 118669605       | A  | T  | -5.695 | 1.23E-08 | --        | 0      | 0.381    | 1     | 0.5368  |
| rs7125066    | 11  | 118721699       | G  | A  | -5.692 | 1.25E-08 | --        | 0      | 0.499    | 1     | 0.4799  |
| rs10892294   | 11  | 118667357       | C  | G  | -5.691 | 1.26E-08 | --        | 0      | 0.448    | 1     | 0.5034  |
| rs7122669    | 11  | 118739056       | A  | G  | -5.691 | 1.26E-08 | --        | 0      | 0.761    | 1     | 0.3831  |
| rs28409215   | 11  | 118679304       | A  | G  | -5.683 | 1.32E-08 | --        | 0      | 0.393    | 1     | 0.5309  |
| rs73005423   | 11  | 118681079       | G  | A  | -5.681 | 1.34E-08 | --        | 0      | 0.472    | 1     | 0.4922  |
| rs11217038   | 11  | 118677355       | A  | G  | -5.677 | 1.37E-08 | --        | 0      | 0.397    | 1     | 0.5286  |
| rs7119044    | 11  | 118738298       | G  | C  | -5.675 | 1.39E-08 | --        | 0      | 0.777    | 1     | 0.3781  |
| rs10892293   | 11  | 118665575       | T  | A  | -5.67  | 1.42E-08 | --        | 0      | 0.384    | 1     | 0.5356  |
| rs11217074   | 11  | 118734000       | C  | T  | -5.666 | 1.46E-08 | --        | -191   | 1.031    | 1     | 0.3099  |
| rs11217046   | 11  | 118698907       | A  | G  | -5.663 | 1.49E-08 | --        | 0      | 0.236    | 1     | 0.6271  |
| rs11217045   | 11  | 118697865       | A  | C  | -5.657 | 1.54E-08 | --        | 0      | 0.308    | 1     | 0.5788  |
| rs73005502   | 11  | 118697906       | G  | A  | -5.657 | 1.54E-08 | --        | 0      | 0.308    | 1     | 0.5788  |
| rs11217036   | 11  | 118675772       | T  | C  | -5.654 | 1.57E-08 | --        | 0      | 0.414    | 1     | 0.52    |
| rs11217037   | 11  | 118677086       | A  | G  | -5.65  | 1.61E-08 | --        | 0      | 0.414    | 1     | 0.5198  |
| rs11217033   | 11  | 118673706       | C  | T  | -5.649 | 1.61E-08 | --        | 0      | 0.417    | 1     | 0.5182  |
| rs7117313    | 11  | 118744396       | C  | G  | -5.618 | 1.93E-08 | --        | 0      | 0.548    | 1     | 0.4593  |
| rs79504890   | 11  | 118701018       | A  | G  | -5.609 | 2.04E-08 | --        | 0      | 0.1      | 1     | 0.7522  |
| rs4936441    | 11  | 118725660       | C  | G  | -5.593 | 2.23E-08 | --        | 0      | 0.328    | 1     | 0.5666  |
| rs1037679725 | 11  | 118726843       | T  | C  | -5.574 | 2.49E-08 | --        | 0      | 0.275    | 1     | 0.6003  |
| rs11217044   | 11  | 118696022       | C  | T  | -5.566 | 2.60E-08 | --        | 0      | 0.321    | 1     | 0.5712  |
| rs11217058   | 11  | 118722149       | A  | G  | -5.551 | 2.85E-08 | --        | 0      | 0.264    | 1     | 0.6072  |
| rs11217066   | 11  | 118726753       | G  | T  | -5.548 | 2.89E-08 | --        | 0      | 0.294    | 1     | 0.5877  |
| rs75249660   | 11  | 118721565       | A  | G  | -5.539 | 3.03E-08 | --        | 0      | 0.412    | 1     | 0.5212  |
| rs7119038    | 11  | 118738281       | G  | A  | -5.501 | 3.77E-08 | --        | 0      | 0.395    | 1     | 0.5296  |
| rs11217006   | 11  | 118609790       | A  | G  | -5.48  | 4.26E-08 | --        | -174.6 | 1.093    | 1     | 0.2959  |
| rs4936443    | 11  | 118740864       | C  | T  | -5.467 | 4.57E-08 | --        | 0      | 0.417    | 1     | 0.5185  |
| rs4938572    | 11  | 118740931       | C  | T  | -5.435 | 5.48E-08 | --        | 0      | 0.405    | 1     | 0.5246  |
| rs6589684    | 11  | 118610957       | A  | G  | -5.431 | 5.62E-08 | --        | -196.7 | 1.011    | 1     | 0.3146  |
| rs10892279   | 11  | 118611781       | A  | G  | -5.426 | 5.76E-08 | --        | -162.5 | 1.143    | 1     | 0.285   |
| rs6589685    | 11  | 118612197       | C  | T  | -5.419 | 5.98E-08 | --        | -192.2 | 1.027    | 1     | 0.3109  |
| rs2155433    | 11  | 118612921       | A  | G  | -5.374 | 7.70E-08 | --        | -195.5 | 1.015    | 1     | 0.3137  |
| rs11826521   | 11  | 118610549       | T  | G  | -5.35  | 8.80E-08 | --        | 0      | 0.929    | 1     | 0.3351  |

|              |    |           |   |   |        |          |    |        |       |   |        |
|--------------|----|-----------|---|---|--------|----------|----|--------|-------|---|--------|
| rs10892280   | 11 | 118611817 | T | C | -5.341 | 9.23E-08 | -- | 0      | 0.939 | 1 | 0.3326 |
| rs7945144    | 11 | 118608716 | G | A | -5.315 | 1.07E-07 | -- | -163.3 | 1.139 | 1 | 0.2858 |
| rs6589682    | 11 | 118606722 | T | C | -5.272 | 1.35E-07 | -- | 0      | 0.664 | 1 | 0.4151 |
| rs56758835   | 11 | 118615340 | A | G | -5.244 | 1.57E-07 | -- | 0      | 0.907 | 1 | 0.3408 |
| rs57494551   | 11 | 118661398 | T | C | -5.244 | 1.57E-07 | -- | -121.9 | 1.352 | 1 | 0.2449 |
| rs12364971   | 11 | 118607794 | G | T | -5.215 | 1.84E-07 | -- | 0      | 0.799 | 1 | 0.3715 |
| rs76409436   | 11 | 118607871 | A | G | -5.19  | 2.10E-07 | -- | 0      | 0.834 | 1 | 0.3611 |
| rs11217020   | 11 | 118639353 | A | G | -5.184 | 2.17E-07 | -- | 0      | 0.977 | 1 | 0.3229 |
| rs73003215   | 11 | 118649512 | A | G | -5.171 | 2.33E-07 | -- | -163.3 | 1.139 | 1 | 0.2858 |
| rs1048024    | 11 | 118618776 | T | A | -5.169 | 2.36E-07 | -- | -193.8 | 1.021 | 1 | 0.3122 |
| rs2004781    | 11 | 118619253 | T | C | -5.169 | 2.36E-07 | -- | -193.8 | 1.021 | 1 | 0.3122 |
| rs2077579    | 11 | 118619047 | G | T | -5.169 | 2.36E-07 | -- | -193.8 | 1.021 | 1 | 0.3122 |
| rs3889239    | 11 | 118619960 | T | C | -5.169 | 2.36E-07 | -- | -193.8 | 1.021 | 1 | 0.3122 |
| rs11217009   | 11 | 118615785 | T | C | -5.162 | 2.44E-07 | -- | 0      | 0.999 | 1 | 0.3176 |
| rs11217002   | 11 | 118607150 | T | C | -5.157 | 2.52E-07 | -- | 0      | 0.671 | 1 | 0.4127 |
| rs56267528   | 11 | 118607311 | A | C | -5.149 | 2.62E-07 | -- | 0      | 0.627 | 1 | 0.4283 |
| rs10892283   | 11 | 118636980 | G | A | -5.147 | 2.65E-07 | -- | -185.4 | 1.051 | 1 | 0.3053 |
| rs11217019   | 11 | 118636343 | A | C | -5.143 | 2.71E-07 | -- | -184.2 | 1.056 | 1 | 0.3042 |
| rs74676029   | 11 | 118628373 | T | C | -5.139 | 2.77E-07 | -- | -184   | 1.056 | 1 | 0.3041 |
| rs55894437   | 11 | 118607417 | T | C | -5.128 | 2.93E-07 | -- | 0      | 0.612 | 1 | 0.4341 |
| rs10892292   | 11 | 118655340 | C | G | -5.111 | 3.21E-07 | -- | 0      | 0.944 | 1 | 0.3313 |
| rs6589681    | 11 | 118606521 | T | C | -5.108 | 3.26E-07 | -- | 0      | 0.473 | 1 | 0.4916 |
| rs874621     | 11 | 118655645 | A | G | -5.105 | 3.31E-07 | -- | 0      | 0.946 | 1 | 0.3308 |
| rs10892287   | 11 | 118642999 | C | T | -5.105 | 3.31E-07 | -- | 0      | 0.941 | 1 | 0.332  |
| rs10892288   | 11 | 118644694 | G | A | -5.104 | 3.32E-07 | -- | 0      | 0.939 | 1 | 0.3325 |
| rs10892286   | 11 | 118642085 | C | A | -5.1   | 3.39E-07 | -- | 0      | 0.946 | 1 | 0.3307 |
| rs10892289   | 11 | 118646003 | T | C | -5.076 | 3.85E-07 | -- | 0      | 0.967 | 1 | 0.3254 |
| rs56043232   | 11 | 118648373 | T | C | -5.076 | 3.85E-07 | -- | 0      | 0.967 | 1 | 0.3254 |
| rs10892290   | 11 | 118653503 | T | G | -5.053 | 4.34E-07 | -- | 0      | 0.747 | 1 | 0.3875 |
| rs571470     | 11 | 118697012 | A | G | -5.038 | 4.70E-07 | -- | 0      | 0.043 | 1 | 0.8364 |
| rs77209083   | 11 | 118607569 | G | A | -5.006 | 5.56E-07 | -- | 0      | 0.546 | 1 | 0.4599 |
| rs10892291   | 11 | 118653517 | T | C | -4.978 | 6.44E-07 | -- | 0      | 0.588 | 1 | 0.4432 |
| rs11217001   | 11 | 118607046 | A | G | -4.896 | 9.79E-07 | -- | 0      | 0.395 | 1 | 0.5296 |
| rs6589686    | 11 | 118612565 | A | G | -4.611 | 4.01E-06 | -- | 0      | 0.644 | 1 | 0.4224 |
| rs11217078   | 11 | 118750321 | C | T | -4.543 | 5.55E-06 | -- | 0      | 0.595 | 1 | 0.4403 |
| rs10892276   | 11 | 118605628 | A | G | -4.359 | 1.31E-05 | -- | 0      | 0.007 | 1 | 0.9338 |
| rs10892277   | 11 | 118605841 | A | G | -4.354 | 1.34E-05 | -- | 0      | 0.004 | 1 | 0.9516 |
| rs11216998   | 11 | 118604837 | T | C | -4.337 | 1.44E-05 | -- | 0      | 0.012 | 1 | 0.9121 |
| rs11217072   | 11 | 118731762 | G | A | 4.328  | 1.51E-05 | ++ | 0      | 0.242 | 1 | 0.6227 |
| rs34561290   | 11 | 118731599 | T | C | 4.328  | 1.51E-05 | ++ | 0      | 0.242 | 1 | 0.6227 |
| rs10892275   | 11 | 118605617 | A | T | -4.32  | 1.56E-05 | -- | 0      | 0.004 | 1 | 0.952  |
| rs11216993   | 11 | 118603495 | A | T | -4.32  | 1.56E-05 | -- | 0      | 0.697 | 1 | 0.4038 |
| rs10892274   | 11 | 118605463 | T | C | -4.316 | 1.59E-05 | -- | 0      | 0.004 | 1 | 0.951  |
| rs73001429   | 11 | 118603165 | G | T | -4.314 | 1.60E-05 | -- | 0      | 0.529 | 1 | 0.4671 |
| rs11217070   | 11 | 118729860 | G | T | 4.31   | 1.64E-05 | ++ | 0      | 0.272 | 1 | 0.6019 |
| rs11217063   | 11 | 118725942 | C | G | 4.298  | 1.72E-05 | ++ | 0      | 0.134 | 1 | 0.7145 |
| rs10892300   | 11 | 118729210 | T | C | 4.297  | 1.73E-05 | ++ | 0      | 0.26  | 1 | 0.6103 |
| rs11217065   | 11 | 118726647 | C | T | 4.289  | 1.79E-05 | ++ | 0      | 0.137 | 1 | 0.7108 |
| rs12790489   | 11 | 118729583 | C | T | 4.286  | 1.82E-05 | ++ | 0      | 0.218 | 1 | 0.6407 |
| rs11216994   | 11 | 118603520 | T | C | -4.283 | 1.84E-05 | -- | 0      | 0.471 | 1 | 0.4926 |
| rs7929520    | 11 | 118730141 | G | A | 4.28   | 1.87E-05 | ++ | 0      | 0.221 | 1 | 0.6381 |
| rs57719838   | 11 | 118724723 | C | T | 4.28   | 1.87E-05 | ++ | 0      | 0.142 | 1 | 0.7066 |
| rs11216995   | 11 | 118603526 | A | G | -4.264 | 2.01E-05 | -- | 0      | 0.486 | 1 | 0.4856 |
| rs11216999   | 11 | 118604941 | C | T | -4.259 | 2.06E-05 | -- | 0      | 0.004 | 1 | 0.9479 |
| rs11216997   | 11 | 118604638 | T | C | -4.233 | 2.31E-05 | -- | 0      | 0.573 | 1 | 0.4491 |
| rs1174717189 | 11 | 118734521 | T | A | 4.225  | 2.38E-05 | ++ | 0      | 0.272 | 1 | 0.6021 |

|             |    |           |   |   |        |          |    |      |       |   |         |
|-------------|----|-----------|---|---|--------|----------|----|------|-------|---|---------|
| rs112561833 | 11 | 118603736 | C | A | -4.225 | 2.39E-05 | -- | 0    | 0.561 | 1 | 0.4538  |
| rs7103067   | 11 | 118723379 | A | G | 4.225  | 2.39E-05 | ++ | 0    | 0.08  | 1 | 0.7777  |
| rs10892272  | 11 | 118602707 | G | C | -4.224 | 2.40E-05 | -- | 0    | 0.511 | 1 | 0.4746  |
| rs10892273  | 11 | 118602809 | A | G | -4.22  | 2.44E-05 | -- | 0    | 0.515 | 1 | 0.473   |
| rs10892271  | 11 | 118598544 | A | G | -4.149 | 3.35E-05 | -- | 0    | 0.636 | 1 | 0.4251  |
| rs10790267  | 11 | 118727169 | T | C | 4.125  | 3.71E-05 | ++ | 0    | 0.036 | 1 | 0.8495  |
| rs149794440 | 11 | 118041740 | C | T | -4.122 | 3.76E-05 | -? | 0    | 0     | 0 | 1       |
| rs7483509   | 11 | 118740180 | A | G | 4.114  | 3.88E-05 | ++ | 0    | 0.075 | 1 | 0.7837  |
| rs11217067  | 11 | 118727332 | T | G | 4.079  | 4.52E-05 | ++ | 0    | 0.022 | 1 | 0.8827  |
| rs4936442   | 11 | 118728320 | T | C | 4.038  | 5.40E-05 | ++ | 0    | 0.029 | 1 | 0.8641  |
| rs622722    | 11 | 118711790 | A | G | 3.776  | 0.00016  | ++ | 0    | 0.006 | 1 | 0.938   |
| rs10891973  | 11 | 116287909 | A | G | -3.759 | 0.00017  | -? | 0    | 0     | 0 | 1       |
| rs10891972  | 11 | 116287783 | T | C | -3.752 | 0.00018  | -? | 0    | 0     | 0 | 1       |
| rs587816    | 11 | 118689871 | A | C | 3.583  | 0.00034  | ++ | 0    | 0.009 | 1 | 0.9236  |
| rs577121    | 11 | 118690550 | C | T | 3.568  | 0.00036  | ++ | 0    | 0.013 | 1 | 0.91    |
| rs11216972  | 11 | 118585826 | T | C | -3.536 | 0.00041  | -- | 0    | 0.166 | 1 | 0.6839  |
| rs584935    | 11 | 118696175 | A | G | 3.47   | 0.00052  | ++ | 0    | 0.02  | 1 | 0.8864  |
| rs583905    | 11 | 118695908 | G | A | 3.47   | 0.00052  | ++ | 0    | 0.024 | 1 | 0.8767  |
| rs10892263  | 11 | 118587319 | C | T | -3.467 | 0.00053  | -- | 0    | 0.077 | 1 | 0.7814  |
| rs149509653 | 11 | 118558425 | A | G | 3.446  | 0.00057  | ++ | 0    | 0.033 | 1 | 0.8562  |
| rs10892262  | 11 | 118587097 | C | G | -3.427 | 0.00061  | -- | 0    | 0.074 | 1 | 0.7859  |
| rs12421790  | 11 | 118588952 | T | C | -3.403 | 0.00067  | -- | 0    | 0.028 | 1 | 0.8673  |
| rs10790329  | 11 | 119537683 | C | T | -3.4   | 0.00067  | -? | 0    | 0     | 0 | 1       |
| rs497916    | 11 | 118758089 | T | C | -3.377 | 0.00073  | -- | 0    | 0.961 | 1 | 0.3269  |
| rs113641235 | 11 | 118700264 | T | C | 3.369  | 0.00076  | ++ | 0    | 0.001 | 1 | 0.9778  |
| rs566733    | 11 | 118608625 | G | C | 3.363  | 0.00077  | ++ | 0    | 0.133 | 1 | 0.7152  |
| rs11216980  | 11 | 118590668 | A | C | -3.363 | 0.00077  | -- | 0    | 0.005 | 1 | 0.9443  |
| rs567680    | 11 | 118608532 | G | C | 3.362  | 0.00077  | ++ | 0    | 0.154 | 1 | 0.6947  |
| rs488219    | 11 | 118620697 | C | T | 3.36   | 0.00078  | ++ | 0    | 0.031 | 1 | 0.8612  |
| rs666094    | 11 | 117489521 | C | T | 3.356  | 0.00079  | +  | 0    | 0     | 0 | 1       |
| rs546393    | 11 | 118624250 | C | T | 3.354  | 0.0008   | ++ | 0    | 0.032 | 1 | 0.8578  |
| rs632124    | 11 | 118613235 | A | T | 3.353  | 0.0008   | ++ | 0    | 0.16  | 1 | 0.689   |
| rs607125    | 11 | 118617299 | C | T | 3.336  | 0.00085  | ++ | 0    | 0.057 | 1 | 0.8115  |
| rs12421793  | 11 | 118589012 | A | C | -3.332 | 0.00086  | -- | 0    | 0.004 | 1 | 0.9474  |
| rs10128600  | 11 | 118700425 | C | T | 3.325  | 0.00089  | ++ | 0    | 0.001 | 1 | 0.9807  |
| rs11217004  | 11 | 118607622 | A | G | 3.321  | 0.0009   | ++ | 0    | 0.213 | 1 | 0.6443  |
| rs73005500  | 11 | 118697375 | C | T | 3.304  | 0.00095  | ++ | 0    | 0.004 | 1 | 0.9466  |
| rs2510901   | 11 | 118699863 | A | G | 3.288  | 0.00101  | ++ | 0    | 0     | 1 | 0.9918  |
| rs555639    | 11 | 118629031 | A | G | 3.288  | 0.00101  | ++ | 0    | 0.02  | 1 | 0.8879  |
| rs640373    | 11 | 118698160 | G | A | 3.269  | 0.00108  | ++ | 0    | 0     | 1 | 0.9992  |
| rs638893    | 11 | 118698537 | G | A | 3.268  | 0.00108  | ++ | 0    | 0     | 1 | 1       |
| rs639885    | 11 | 118698294 | A | G | 3.268  | 0.00108  | ++ | 0    | 0     | 1 | 1       |
| rs639915    | 11 | 118698274 | A | G | 3.268  | 0.00108  | ++ | 0    | 0     | 1 | 1       |
| rs2276341   | 11 | 117375461 | A | G | -3.267 | 0.00109  | -? | 0    | 0     | 0 | 1       |
| rs4938394   | 11 | 117373947 | C | T | -3.266 | 0.00109  | -? | 0    | 0     | 0 | 1       |
| rs516332    | 11 | 118698777 | G | A | 3.263  | 0.0011   | ++ | 0    | 0     | 1 | 0.9957  |
| rs2508564   | 11 | 118699744 | C | T | 3.256  | 0.00113  | ++ | 0    | 0     | 1 | 0.9979  |
| rs583213    | 11 | 118669178 | G | T | 3.221  | 0.00128  | ++ | 0    | 0.791 | 1 | 0.3739  |
| rs10892132  | 11 | 117375951 | A | G | -3.219 | 0.00129  | -? | 0    | 0     | 0 | 1       |
| rs581045    | 11 | 118632522 | T | C | 3.219  | 0.00129  | ++ | 0    | 0.01  | 1 | 0.9204  |
| rs2155394   | 11 | 117378116 | A | G | -3.218 | 0.00129  | -? | 0    | 0     | 0 | 1       |
| rs513935    | 11 | 116231840 | A | G | -3.205 | 0.00135  | -- | 30.4 | 4.307 | 1 | 0.03795 |
| rs1784543   | 11 | 118631653 | T | A | 3.202  | 0.00136  | ++ | 0    | 0.026 | 1 | 0.8727  |
| rs507890    | 11 | 118631288 | C | T | 3.202  | 0.00137  | ++ | 0    | 0.025 | 1 | 0.8732  |
| rs11216843  | 11 | 118151329 | T | A | -3.199 | 0.00138  | -? | 0    | 0     | 0 | 1       |
| rs7932097   | 11 | 117373125 | T | C | -3.178 | 0.00148  | -? | 0    | 0     | 0 | 1       |

|              |    |           |   |   |        |         |    |      |       |   |         |
|--------------|----|-----------|---|---|--------|---------|----|------|-------|---|---------|
| rs515523     | 11 | 118658075 | G | A | 3.177  | 0.00149 | ++ | 0    | 0.019 | 1 | 0.8917  |
| rs7112940    | 11 | 117373432 | G | A | -3.167 | 0.00154 | -? | 0    | 0     | 0 | 1       |
| rs582200     | 11 | 118668908 | G | A | 3.163  | 0.00156 | ++ | 0    | 0.334 | 1 | 0.5633  |
| rs555649     | 11 | 118651809 | C | T | 3.162  | 0.00157 | ++ | 0    | 0.017 | 1 | 0.8965  |
| rs472641     | 11 | 118617544 | G | A | -3.156 | 0.0016  | -- | 0    | 0.046 | 1 | 0.8303  |
| rs476246     | 11 | 118617920 | T | C | -3.154 | 0.00161 | -- | 0    | 0.042 | 1 | 0.8385  |
| rs10892256   | 11 | 118578705 | A | G | -3.151 | 0.00163 | -- | 0    | 0.447 | 1 | 0.5038  |
| rs11216960   | 11 | 118577873 | A | G | -3.151 | 0.00163 | -- | 0    | 0.447 | 1 | 0.5038  |
| rs7933859    | 11 | 118662045 | T | C | 3.15   | 0.00163 | ++ | 0    | 0.491 | 1 | 0.4835  |
| rs61901411   | 11 | 118665324 | T | C | 3.146  | 0.00165 | ++ | 0    | 0.297 | 1 | 0.5859  |
| rs4508234    | 11 | 118662203 | G | C | 3.145  | 0.00166 | ++ | 0    | 0.495 | 1 | 0.4815  |
| rs4938544    | 11 | 118665009 | A | G | 3.14   | 0.00169 | ++ | 0    | 0.273 | 1 | 0.6016  |
| rs2231449    | 11 | 118186305 | A | C | -3.138 | 0.0017  | -? | 0    | 0     | 0 | 1       |
| rs10892260   | 11 | 118583525 | C | A | -3.138 | 0.0017  | -- | 0    | 0.35  | 1 | 0.5542  |
| rs2510897    | 11 | 118644582 | C | A | 3.137  | 0.00171 | ++ | 0    | 0.017 | 1 | 0.8972  |
| rs500254     | 11 | 118678780 | G | A | 3.133  | 0.00173 | ++ | 0    | 0.259 | 1 | 0.6107  |
| rs2105782    | 11 | 118659896 | C | T | 3.133  | 0.00173 | ++ | 0    | 0.031 | 1 | 0.8608  |
| rs581062     | 11 | 118624767 | A | G | -3.13  | 0.00175 | -- | 0    | 0.053 | 1 | 0.8185  |
| rs487728     | 11 | 118621495 | G | C | -3.129 | 0.00175 | -- | 0    | 0.028 | 1 | 0.8662  |
| rs499343     | 11 | 118626511 | T | C | -3.129 | 0.00175 | -- | 0    | 0.04  | 1 | 0.8406  |
| rs10790261   | 11 | 118579747 | G | A | -3.128 | 0.00176 | -- | 0    | 0.541 | 1 | 0.4621  |
| rs10892257   | 11 | 118579327 | A | G | -3.121 | 0.0018  | -- | 0    | 0.47  | 1 | 0.4932  |
| rs6589612    | 11 | 117373055 | G | C | -3.109 | 0.00188 | -? | 0    | 0     | 0 | 1       |
| rs11216965   | 11 | 118582613 | A | C | -3.108 | 0.00188 | -- | 0    | 0.468 | 1 | 0.494   |
| rs5006102    | 11 | 118662340 | A | T | 3.108  | 0.00188 | ++ | 0    | 0.424 | 1 | 0.5151  |
| rs10892258   | 11 | 118579865 | A | G | -3.105 | 0.0019  | -- | 0    | 0.473 | 1 | 0.4917  |
| rs11216964   | 11 | 118581895 | A | G | -3.104 | 0.00191 | -- | 0    | 0.471 | 1 | 0.4927  |
| rs675003     | 11 | 118677083 | T | C | 3.103  | 0.00192 | ++ | 0    | 0.273 | 1 | 0.6013  |
| rs11216961   | 11 | 118580338 | G | C | -3.103 | 0.00192 | -- | 0    | 0.466 | 1 | 0.4947  |
| rs11216969   | 11 | 118584340 | C | T | -3.102 | 0.00192 | -- | 0    | 0.474 | 1 | 0.4912  |
| rs11216846   | 11 | 118163916 | A | G | -3.101 | 0.00193 | -? | 0    | 0     | 0 | 1       |
| rs10892259   | 11 | 118583002 | A | G | -3.088 | 0.00201 | -- | 0    | 0.482 | 1 | 0.4877  |
| rs495430     | 11 | 116235005 | A | G | -3.088 | 0.00202 | -- | 15.9 | 3.568 | 1 | 0.05889 |
| rs11216956   | 11 | 118575326 | A | G | -3.088 | 0.00202 | -- | 0    | 0.497 | 1 | 0.4809  |
| rs11216848   | 11 | 118181481 | A | C | -3.079 | 0.00208 | -? | 0    | 0     | 0 | 1       |
| rs515707     | 11 | 118685481 | T | C | 3.071  | 0.00213 | +  | 0    | 0     | 0 | 1       |
| rs10790181   | 11 | 117289347 | G | A | 3.062  | 0.0022  | +  | 0    | 0     | 0 | 1       |
| rs553906     | 11 | 117288898 | G | T | 3.062  | 0.0022  | +  | 0    | 0     | 0 | 1       |
| rs579411     | 11 | 117288387 | A | G | 3.062  | 0.0022  | +  | 0    | 0     | 0 | 1       |
| rs2124975    | 11 | 117286824 | G | A | 3.061  | 0.00221 | +  | 0    | 0     | 0 | 1       |
| rs2368164    | 11 | 117287088 | C | T | 3.061  | 0.00221 | +  | 0    | 0     | 0 | 1       |
| rs2510451    | 11 | 117287272 | G | C | 3.061  | 0.00221 | +  | 0    | 0     | 0 | 1       |
| rs2925767    | 11 | 117287230 | A | G | 3.061  | 0.00221 | +  | 0    | 0     | 0 | 1       |
| rs523159     | 11 | 117260504 | A | G | 3.057  | 0.00224 | +  | 0    | 0     | 0 | 1       |
| rs473446     | 11 | 117287942 | A | G | 3.054  | 0.00226 | +  | 0    | 0     | 0 | 1       |
| rs522383     | 11 | 117286064 | T | C | 3.054  | 0.00226 | +  | 0    | 0     | 0 | 1       |
| rs524069     | 11 | 117285907 | G | A | 3.054  | 0.00226 | +  | 0    | 0     | 0 | 1       |
| rs1309473877 | 11 | 118657311 | A | C | 3.053  | 0.00227 | ++ | 0    | 0.016 | 1 | 0.898   |
| rs512356     | 11 | 117285619 | A | G | 3.05   | 0.00229 | +  | 0    | 0     | 0 | 1       |
| rs533254     | 11 | 118701898 | A | T | 3.047  | 0.00231 | ++ | 0    | 0.06  | 1 | 0.807   |
| rs10750107   | 11 | 117379086 | C | T | -3.046 | 0.00232 | -? | 0    | 0     | 0 | 1       |
| rs11216962   | 11 | 118580813 | C | T | -3.042 | 0.00235 | -- | 0    | 0.508 | 1 | 0.476   |
| rs11216963   | 11 | 118580814 | A | G | -3.042 | 0.00235 | -- | 0    | 0.508 | 1 | 0.476   |
| rs1270801    | 11 | 117272939 | T | G | 3.039  | 0.00237 | +  | 0    | 0     | 0 | 1       |
| rs1135258    | 11 | 119210583 | T | G | 3.039  | 0.00237 | +  | 0    | 0     | 0 | 1       |
| rs524590     | 11 | 118640063 | T | A | -3.016 | 0.00256 | -- | 0    | 0.091 | 1 | 0.7633  |

|            |    |           |   |   |        |         |    |   |       |   |        |
|------------|----|-----------|---|---|--------|---------|----|---|-------|---|--------|
| rs1170396  | 11 | 118703817 | T | A | 3.013  | 0.00259 | ++ | 0 | 0.1   | 1 | 0.7514 |
| rs2508921  | 11 | 118703484 | T | C | 3.013  | 0.00259 | ++ | 0 | 0.1   | 1 | 0.7514 |
| rs622690   | 11 | 118704265 | T | C | 3.013  | 0.00259 | ++ | 0 | 0.1   | 1 | 0.7513 |
| rs7928228  | 11 | 118703001 | T | C | 3.013  | 0.00259 | ++ | 0 | 0.1   | 1 | 0.7514 |
| rs523148   | 11 | 118682462 | T | C | 3.013  | 0.00259 | +  | 0 | 0     | 0 | 1      |
| rs493647   | 11 | 117290313 | G | A | 3.008  | 0.00263 | +  | 0 | 0     | 0 | 1      |
| rs480791   | 11 | 118704255 | G | A | 3.008  | 0.00263 | ++ | 0 | 0.099 | 1 | 0.7536 |
| rs563162   | 11 | 118944909 | T | C | -3.003 | 0.00268 | -  | 0 | 0     | 0 | 1      |
| rs607472   | 11 | 118680072 | G | C | 3      | 0.0027  | ++ | 0 | 0.001 | 1 | 0.9723 |
| rs10892147 | 11 | 117513801 | C | T | -2.999 | 0.00271 | -  | 0 | 0     | 0 | 1      |
| rs11823544 | 11 | 117285738 | A | G | 2.992  | 0.00277 | +  | 0 | 0     | 0 | 1      |
| rs511549   | 11 | 117285684 | C | A | 2.992  | 0.00277 | +  | 0 | 0     | 0 | 1      |
| rs527056   | 11 | 117285549 | G | A | 2.992  | 0.00277 | +  | 0 | 0     | 0 | 1      |
| rs649338   | 11 | 118705654 | A | G | 2.99   | 0.00279 | ++ | 0 | 0.137 | 1 | 0.7117 |
| rs4938549  | 11 | 118701597 | T | C | 2.988  | 0.00281 | ++ | 0 | 0.091 | 1 | 0.7624 |
| rs530646   | 11 | 118701668 | A | G | 2.988  | 0.00281 | ++ | 0 | 0.091 | 1 | 0.7624 |
| rs57150747 | 11 | 116291220 | A | G | -2.986 | 0.00282 | -  | 0 | 0     | 0 | 1      |
| rs534114   | 11 | 118702002 | A | G | 2.984  | 0.00285 | ++ | 0 | 0.09  | 1 | 0.764  |
| rs513327   | 11 | 117285497 | C | T | 2.978  | 0.00291 | +  | 0 | 0     | 0 | 1      |
| rs7941696  | 11 | 118702936 | G | A | 2.975  | 0.00293 | ++ | 0 | 0.047 | 1 | 0.8279 |
| rs490914   | 11 | 117475052 | T | A | 2.97   | 0.00298 | +  | 0 | 0     | 0 | 1      |
| rs4936374  | 11 | 117290898 | A | G | 2.963  | 0.00304 | +  | 0 | 0     | 0 | 1      |
| rs11606199 | 11 | 118811641 | A | G | -2.963 | 0.00305 | -- | 0 | 0.259 | 1 | 0.6109 |
| rs7941321  | 11 | 118702910 | A | G | 2.96   | 0.00307 | ++ | 0 | 0.084 | 1 | 0.7715 |
| rs598373   | 11 | 118664377 | T | C | -2.958 | 0.00309 | -- | 0 | 0.149 | 1 | 0.6994 |
| rs7928623  | 11 | 117499061 | C | T | -2.954 | 0.00313 | -  | 0 | 0     | 0 | 1      |
| rs1790189  | 11 | 118652326 | G | T | -2.952 | 0.00315 | -- | 0 | 0.036 | 1 | 0.8488 |
| rs1784293  | 11 | 118652373 | C | A | -2.949 | 0.00318 | -- | 0 | 0.037 | 1 | 0.8475 |
| rs2840350  | 11 | 117380850 | T | C | -2.942 | 0.00326 | -  | 0 | 0     | 0 | 1      |
| rs2508570  | 11 | 118678609 | A | G | -2.94  | 0.00328 | -- | 0 | 0.12  | 1 | 0.7288 |
| rs688161   | 11 | 118677710 | G | A | -2.94  | 0.00328 | -- | 0 | 0.129 | 1 | 0.7196 |
| rs680292   | 11 | 117475341 | T | G | 2.936  | 0.00333 | +  | 0 | 0     | 0 | 1      |
| rs490730   | 11 | 117289951 | T | C | 2.925  | 0.00345 | +  | 0 | 0     | 0 | 1      |
| rs1784300  | 11 | 118679629 | T | A | 2.918  | 0.00352 | ++ | 0 | 0.011 | 1 | 0.9174 |
| rs591756   | 11 | 118678881 | T | C | -2.917 | 0.00353 | -- | 0 | 0.094 | 1 | 0.7595 |
| rs2508916  | 11 | 118654651 | G | C | -2.913 | 0.00358 | -- | 0 | 0.015 | 1 | 0.9025 |
| rs4938550  | 11 | 118707171 | G | A | 2.913  | 0.00358 | ++ | 0 | 0.389 | 1 | 0.5326 |
| rs473298   | 11 | 118679387 | G | A | -2.895 | 0.00379 | -- | 0 | 0.109 | 1 | 0.7411 |
| rs516719   | 11 | 118679445 | C | T | -2.895 | 0.00379 | -- | 0 | 0.109 | 1 | 0.7411 |
| rs11823029 | 11 | 116283516 | C | T | -2.889 | 0.00387 | -  | 0 | 0     | 0 | 1      |
| rs540180   | 11 | 118653629 | T | G | -2.884 | 0.00393 | -- | 0 | 0.005 | 1 | 0.9433 |
| rs11606341 | 11 | 117431753 | T | G | -2.883 | 0.00395 | -  | 0 | 0     | 0 | 1      |
| rs528647   | 11 | 116523821 | T | C | 2.879  | 0.00399 | +  | 0 | 0     | 0 | 1      |
| rs2508569  | 11 | 118680045 | C | G | -2.876 | 0.00403 | -- | 0 | 0.083 | 1 | 0.7739 |
| rs6589610  | 11 | 117372097 | T | C | 2.875  | 0.00404 | +  | 0 | 0     | 0 | 1      |
| rs483747   | 11 | 116523167 | C | T | 2.874  | 0.00405 | +  | 0 | 0     | 0 | 1      |
| rs567576   | 11 | 116522559 | G | A | 2.874  | 0.00405 | +  | 0 | 0     | 0 | 1      |
| rs567599   | 11 | 116522565 | T | G | 2.874  | 0.00405 | +  | 0 | 0     | 0 | 1      |
| rs477014   | 11 | 118678986 | C | T | -2.872 | 0.00408 | -- | 0 | 0.084 | 1 | 0.772  |
| rs77694974 | 11 | 120492260 | T | G | 2.871  | 0.0041  | +  | 0 | 0     | 0 | 1      |
| rs3017237  | 11 | 116522625 | C | G | 2.867  | 0.00415 | +  | 0 | 0     | 0 | 1      |
| rs480028   | 11 | 116522770 | G | C | 2.867  | 0.00415 | +  | 0 | 0     | 0 | 1      |
| rs480878   | 11 | 116522854 | A | G | 2.867  | 0.00415 | +  | 0 | 0     | 0 | 1      |
| rs528732   | 11 | 116523844 | A | G | 2.866  | 0.00416 | +  | 0 | 0     | 0 | 1      |
| rs12796102 | 11 | 118662028 | T | C | 2.866  | 0.00416 | ++ | 0 | 0.039 | 1 | 0.8425 |
| rs3017778  | 11 | 116523931 | T | C | 2.858  | 0.00426 | +  | 0 | 0     | 0 | 1      |

|             |    |           |   |   |        |         |    |       |       |   |         |
|-------------|----|-----------|---|---|--------|---------|----|-------|-------|---|---------|
| rs636736    | 11 | 118705145 | G | A | 2.849  | 0.00439 | ++ | 0     | 0.087 | 1 | 0.768   |
| rs3017779   | 11 | 116523988 | T | C | 2.845  | 0.00444 | +? | 0     | 0     | 0 | 1       |
| rs77416199  | 11 | 117498485 | C | T | -2.844 | 0.00445 | -? | 0     | 0     | 0 | 1       |
| rs485638    | 11 | 116523373 | C | G | 2.844  | 0.00445 | +? | 0     | 0     | 0 | 1       |
| rs10892156  | 11 | 117537864 | T | C | 2.844  | 0.00446 | +? | 0     | 0     | 0 | 1       |
| rs6589611   | 11 | 117372126 | T | A | 2.837  | 0.00456 | +? | 0     | 0     | 0 | 1       |
| rs562756    | 11 | 116521975 | C | G | 2.817  | 0.00485 | +? | 0     | 0     | 0 | 1       |
| rs951786    | 11 | 119529529 | G | A | -2.817 | 0.00485 | -? | 0     | 0     | 0 | 1       |
| rs10431082  | 11 | 117537353 | T | G | 2.814  | 0.00489 | +? | 0     | 0     | 0 | 1       |
| rs492182    | 11 | 116522164 | A | G | 2.809  | 0.00497 | +? | 0     | 0     | 0 | 1       |
| rs563917    | 11 | 116522156 | T | C | 2.809  | 0.00497 | +? | 0     | 0     | 0 | 1       |
| rs566416    | 11 | 118759610 | G | T | -2.807 | 0.005   | -- | -57.4 | 1.906 | 1 | 0.1674  |
| rs2511840   | 11 | 119208561 | C | G | -2.8   | 0.00511 | -? | 0     | 0     | 0 | 1       |
| rs563796    | 11 | 116522111 | G | A | 2.794  | 0.0052  | +? | 0     | 0     | 0 | 1       |
| rs77822543  | 11 | 117368804 | T | C | -2.794 | 0.00521 | -? | 0     | 0     | 0 | 1       |
| rs75349886  | 11 | 117496431 | G | A | -2.791 | 0.00525 | -? | 0     | 0     | 0 | 1       |
| rs624515    | 11 | 117370229 | G | T | 2.79   | 0.00526 | +? | 0     | 0     | 0 | 1       |
| rs12280210  | 11 | 116940449 | C | T | -2.788 | 0.00531 | -? | 0     | 0     | 0 | 1       |
| rs12797083  | 11 | 119205735 | C | T | 2.787  | 0.00532 | +? | 0     | 0     | 0 | 1       |
| rs4936383   | 11 | 117380108 | A | G | 2.78   | 0.00544 | +? | 0     | 0     | 0 | 1       |
| rs491022    | 11 | 116521988 | C | T | 2.776  | 0.0055  | +? | 0     | 0     | 0 | 1       |
| rs7946890   | 11 | 117494945 | C | A | -2.776 | 0.00551 | -? | 0     | 0     | 0 | 1       |
| rs565607    | 11 | 116522330 | T | C | 2.775  | 0.00552 | +? | 0     | 0     | 0 | 1       |
| rs575906    | 11 | 116521558 | G | A | 2.773  | 0.00555 | +? | 0     | 0     | 0 | 1       |
| rs4936554   | 11 | 120691285 | T | C | -2.773 | 0.00556 | -? | 0     | 0     | 0 | 1       |
| rs506222    | 11 | 116520434 | C | A | 2.772  | 0.00557 | +? | 0     | 0     | 0 | 1       |
| rs11216860  | 11 | 118240332 | C | T | -2.769 | 0.00562 | -- | 0     | 0.44  | 1 | 0.5071  |
| rs12795576  | 11 | 119205830 | G | A | 2.765  | 0.00569 | +? | 0     | 0     | 0 | 1       |
| rs1240772   | 11 | 116519129 | C | G | -2.765 | 0.0057  | -? | 0     | 0     | 0 | 1       |
| rs112525313 | 11 | 118014873 | T | C | -2.76  | 0.00578 | -- | -35.7 | 2.211 | 1 | 0.137   |
| rs948412    | 11 | 119214135 | G | A | -2.758 | 0.00582 | -? | 0     | 0     | 0 | 1       |
| rs10790191  | 11 | 117372548 | A | G | 2.751  | 0.00594 | +? | 0     | 0     | 0 | 1       |
| rs11824001  | 11 | 119203505 | T | C | 2.741  | 0.00612 | +? | 0     | 0     | 0 | 1       |
| rs533668    | 11 | 116521135 | G | T | 2.74   | 0.00614 | +? | 0     | 0     | 0 | 1       |
| rs544479    | 11 | 116520398 | C | T | 2.74   | 0.00614 | +? | 0     | 0     | 0 | 1       |
| rs549125    | 11 | 116520926 | G | C | 2.74   | 0.00614 | +? | 0     | 0     | 0 | 1       |
| rs573985    | 11 | 116521316 | A | G | 2.739  | 0.00616 | +? | 0     | 0     | 0 | 1       |
| rs577941    | 11 | 116226290 | A | G | -2.736 | 0.00622 | -- | -25.8 | 2.384 | 1 | 0.1226  |
| rs2239013   | 11 | 116693353 | T | C | -2.736 | 0.00622 | -- | 0     | 0.001 | 1 | 0.9695  |
| rs543824    | 11 | 118762218 | G | A | -2.735 | 0.00624 | -- | -69.1 | 1.774 | 1 | 0.1829  |
| rs9888246   | 11 | 119527302 | T | C | -2.734 | 0.00625 | -? | 0     | 0     | 0 | 1       |
| rs2282550   | 11 | 118220035 | C | T | -2.727 | 0.00639 | -- | 0     | 0.037 | 1 | 0.8478  |
| rs490257    | 11 | 116220570 | G | C | -2.723 | 0.00648 | -- | 51.3  | 6.155 | 1 | 0.0131  |
| rs76858861  | 11 | 117201458 | G | A | 2.721  | 0.00652 | +? | 0     | 0     | 0 | 1       |
| rs499790    | 11 | 116519739 | T | C | 2.719  | 0.00655 | +? | 0     | 0     | 0 | 1       |
| rs1561966   | 11 | 118221474 | A | G | -2.718 | 0.00657 | -- | 0     | 0.04  | 1 | 0.8413  |
| rs513533    | 11 | 116519358 | G | A | 2.715  | 0.00663 | +? | 0     | 0     | 0 | 1       |
| rs516043    | 11 | 116519584 | G | C | 2.715  | 0.00663 | +? | 0     | 0     | 0 | 1       |
| rs582179    | 11 | 117104148 | G | A | 2.714  | 0.00664 | +? | 0     | 0     | 0 | 1       |
| rs668628    | 11 | 118519213 | T | G | 2.713  | 0.00668 | ++ | 0     | 0.367 | 1 | 0.5448  |
| rs79874233  | 11 | 116636305 | C | G | 2.712  | 0.00669 | +? | 0     | 0     | 0 | 1       |
| rs476367    | 11 | 116220637 | C | T | -2.708 | 0.00677 | -- | 50.9  | 6.115 | 1 | 0.01341 |
| rs505349    | 11 | 116225004 | G | A | -2.706 | 0.00682 | -- | 54.1  | 6.536 | 1 | 0.01057 |
| rs73016221  | 11 | 118220027 | C | T | -2.705 | 0.00684 | -? | 0     | 0     | 0 | 1       |
| rs931953    | 11 | 119528905 | G | A | -2.703 | 0.00686 | -? | 0     | 0     | 0 | 1       |
| rs76457018  | 11 | 118762701 | A | G | 2.702  | 0.00689 | +? | 18.2  | 3.667 | 1 | 0.05551 |

|             |    |           |   |   |        |         |    |        |       |   |          |
|-------------|----|-----------|---|---|--------|---------|----|--------|-------|---|----------|
| rs551372    | 11 | 116222588 | T | C | -2.698 | 0.00697 | -- | 55.4   | 6.721 | 1 | 0.009528 |
| rs1262892   | 11 | 116588904 | A | G | 2.694  | 0.00705 | +? | 0      | 0     | 0 | 1        |
| rs560299    | 11 | 116220063 | C | G | -2.694 | 0.00706 | -- | 51.6   | 6.204 | 1 | 0.01275  |
| rs523604    | 11 | 118755738 | G | A | -2.693 | 0.00708 | -- | 0      | 0.42  | 1 | 0.5171   |
| rs236911    | 11 | 117085270 | C | A | 2.692  | 0.00709 | +? | 0      | 0     | 0 | 1        |
| rs570448    | 11 | 116216432 | C | G | -2.692 | 0.00711 | -- | -34.6  | 2.229 | 1 | 0.1355   |
| rs11216492  | 11 | 117536758 | G | A | 2.683  | 0.0073  | +? | 0      | 0     | 0 | 1        |
| rs560476    | 11 | 116220118 | A | G | -2.681 | 0.00733 | -- | 51.2   | 6.149 | 1 | 0.01315  |
| rs4445648   | 11 | 119529524 | T | C | -2.68  | 0.00735 | -? | 0      | 0     | 0 | 1        |
| rs630923    | 11 | 118754353 | A | C | -2.68  | 0.00737 | -- | -135.9 | 1.272 | 1 | 0.2594   |
| rs558659    | 11 | 116216759 | A | G | -2.679 | 0.00738 | -- | 52.6   | 6.332 | 1 | 0.01186  |
| rs567681    | 11 | 116216713 | C | A | -2.679 | 0.00738 | -- | 52.6   | 6.332 | 1 | 0.01186  |
| rs75542613  | 11 | 116679155 | A | G | -2.679 | 0.00738 | -- | 0      | 0.023 | 1 | 0.8787   |
| rs2512160   | 11 | 116222809 | G | A | -2.679 | 0.00739 | -- | 56.9   | 6.958 | 1 | 0.008346 |
| rs4096589   | 11 | 117363891 | T | A | -2.669 | 0.0076  | -? | 0      | 0     | 0 | 1        |
| rs71480346  | 11 | 117502041 | T | C | -2.668 | 0.00764 | -? | 0      | 0     | 0 | 1        |
| rs4245201   | 11 | 119529332 | C | T | -2.666 | 0.00769 | -? | 0      | 0     | 0 | 1        |
| rs12721026  | 11 | 116706168 | G | T | -2.664 | 0.00771 | -- | 0      | 0.209 | 1 | 0.6479   |
| rs3212263   | 11 | 118216423 | G | A | -2.664 | 0.00773 | -- | 0      | 0.026 | 1 | 0.8721   |
| rs491113    | 11 | 116225111 | C | G | -2.662 | 0.00777 | -- | 54.5   | 6.587 | 1 | 0.01027  |
| rs10790182  | 11 | 117291361 | T | C | 2.661  | 0.0078  | +? | 0      | 0     | 0 | 1        |
| rs545657    | 11 | 116216809 | G | A | -2.66  | 0.00782 | -- | 53.2   | 6.406 | 1 | 0.01137  |
| rs68096541  | 11 | 117405907 | C | G | -2.657 | 0.00787 | -? | 0      | 0     | 0 | 1        |
| rs112618266 | 11 | 116726709 | T | C | -2.656 | 0.00792 | -- | 0      | 0.039 | 1 | 0.8428   |
| rs17120099  | 11 | 116735460 | C | A | -2.654 | 0.00795 | -- | 0      | 0     | 1 | 0.9826   |
| rs3212262   | 11 | 118217854 | T | G | -2.653 | 0.00798 | -? | 0      | 0     | 0 | 1        |
| rs73001406  | 11 | 118560857 | A | G | -2.651 | 0.00802 | -- | 0      | 0.408 | 1 | 0.523    |
| rs45586434  | 11 | 118828184 | A | C | -2.646 | 0.00815 | -- | 0      | 0.966 | 1 | 0.3257   |
| rs11217099  | 11 | 118809882 | A | C | -2.643 | 0.00822 | -- | 0      | 0.017 | 1 | 0.8949   |
| rs4936460   | 11 | 118912207 | T | C | -2.639 | 0.0083  | -? | 0      | 0     | 0 | 1        |
| rs948411    | 11 | 119213782 | T | A | -2.634 | 0.00843 | -? | 0      | 0     | 0 | 1        |
| rs7929496   | 11 | 117502961 | T | C | -2.629 | 0.00855 | -? | 0      | 0     | 0 | 1        |
| rs1892918   | 11 | 117531465 | C | A | -2.627 | 0.00861 | -? | 0      | 0     | 0 | 1        |
| rs472950    | 11 | 116226909 | T | C | -2.627 | 0.00861 | -- | 56.1   | 6.838 | 1 | 0.008924 |
| rs77967735  | 11 | 117453109 | G | A | -2.623 | 0.00873 | -? | 0      | 0     | 0 | 1        |
| rs4635117   | 11 | 116981001 | A | G | 2.618  | 0.00885 | +? | 0      | 0     | 0 | 1        |
| rs11216856  | 11 | 118227838 | T | C | -2.615 | 0.00892 | -- | 0      | 0.065 | 1 | 0.7994   |
| rs11217102  | 11 | 118824917 | A | G | -2.615 | 0.00892 | -- | 0      | 0.815 | 1 | 0.3668   |
| rs71480307  | 11 | 116516873 | A | G | 2.614  | 0.00895 | +? | 0      | 0     | 0 | 1        |
| rs12283648  | 11 | 120702916 | C | A | -2.601 | 0.00929 | -? | 0      | 0     | 0 | 1        |
| rs35165288  | 11 | 116517325 | C | T | 2.598  | 0.00938 | +? | 0      | 0     | 0 | 1        |
| rs2511847   | 11 | 119203359 | A | G | -2.597 | 0.0094  | -? | 0      | 0     | 0 | 1        |
| rs931954    | 11 | 119529106 | A | G | -2.597 | 0.0094  | -? | 0      | 0     | 0 | 1        |
| rs686413    | 11 | 117537710 | A | G | -2.596 | 0.00942 | -? | 0      | 0     | 0 | 1        |
| rs12275565  | 11 | 116753552 | G | A | -2.596 | 0.00945 | -- | 0      | 0.005 | 1 | 0.9417   |
| rs2276419   | 11 | 118230359 | T | C | -2.593 | 0.00952 | -? | 0      | 0     | 0 | 1        |
| rs568306    | 11 | 116223775 | A | C | -2.593 | 0.00953 | -- | -21.2  | 2.476 | 1 | 0.1156   |
| rs564046    | 11 | 116226845 | G | A | -2.592 | 0.00954 | -- | -22.3  | 2.452 | 1 | 0.1174   |
| rs12286581  | 11 | 116748744 | C | T | -2.588 | 0.00965 | -- | 0      | 0.006 | 1 | 0.9384   |
| rs12292614  | 11 | 116748515 | G | A | -2.588 | 0.00965 | -- | 0      | 0.006 | 1 | 0.9384   |
| rs12416987  | 11 | 116754265 | C | T | -2.588 | 0.00965 | -- | 0      | 0.006 | 1 | 0.9384   |
| rs75294699  | 11 | 116749072 | A | C | -2.588 | 0.00965 | -- | 0      | 0.006 | 1 | 0.9384   |
| rs2276417   | 11 | 118230223 | G | T | -2.586 | 0.00971 | -- | 0      | 0.058 | 1 | 0.8101   |
| rs10892040  | 11 | 116756986 | A | G | -2.586 | 0.00972 | -- | 0      | 0.005 | 1 | 0.9416   |
| rs11216174  | 11 | 116757248 | G | A | -2.586 | 0.00972 | -- | 0      | 0.005 | 1 | 0.9416   |
| rs11216175  | 11 | 116757398 | T | C | -2.586 | 0.00972 | -- | 0      | 0.005 | 1 | 0.9416   |

|              |    |           |   |   |        |         |    |        |       |   |          |
|--------------|----|-----------|---|---|--------|---------|----|--------|-------|---|----------|
| rs12284346   | 11 | 116757793 | C | T | -2.586 | 0.00972 | -- | 0      | 0.005 | 1 | 0.9416   |
| rs2044426    | 11 | 116756183 | A | G | -2.586 | 0.00972 | -- | 0      | 0.005 | 1 | 0.9416   |
| rs12294191   | 11 | 116759824 | G | A | -2.585 | 0.00974 | -- | 0      | 0.005 | 1 | 0.9411   |
| rs4936358    | 11 | 116512477 | A | G | -2.583 | 0.00978 | -? | 0      | 0     | 0 | 1        |
| rs12278117   | 11 | 116748169 | A | G | -2.58  | 0.00988 | -- | 0      | 0.007 | 1 | 0.9347   |
| rs12279433   | 11 | 116748221 | T | G | -2.58  | 0.00988 | -- | 0      | 0.007 | 1 | 0.9347   |
| rs17120119   | 11 | 116747282 | G | C | -2.58  | 0.00988 | -- | 0      | 0.007 | 1 | 0.9347   |
| rs494459     | 11 | 118574675 | T | C | 2.578  | 0.00993 | ++ | 0      | 0.014 | 1 | 0.9046   |
| rs524409     | 11 | 118574311 | T | C | 2.578  | 0.00993 | ++ | 0      | 0.014 | 1 | 0.9046   |
| rs59607164   | 11 | 117458673 | G | A | -2.578 | 0.00993 | -? | 0      | 0     | 0 | 1        |
| rs140567534  | 11 | 120988038 | G | T | -2.576 | 0.00999 | -? | 0      | 0     | 0 | 1        |
| rs507763     | 11 | 118824683 | C | G | -2.574 | 0.01004 | -- | 0      | 0.857 | 1 | 0.3546   |
| rs594306     | 11 | 117531961 | A | T | -2.572 | 0.01012 | -? | 0      | 0     | 0 | 1        |
| rs150555490  | 11 | 116697081 | T | C | -2.571 | 0.01014 | -? | 0      | 0     | 0 | 1        |
| rs530901     | 11 | 118575011 | C | T | 2.57   | 0.01016 | ++ | 0      | 0.013 | 1 | 0.9082   |
| rs625735     | 11 | 118575419 | A | G | 2.57   | 0.01016 | ++ | 0      | 0.013 | 1 | 0.9082   |
| rs626645     | 11 | 118575180 | C | T | 2.57   | 0.01016 | ++ | 0      | 0.013 | 1 | 0.9082   |
| rs627391     | 11 | 118573916 | T | A | 2.57   | 0.01016 | ++ | 0      | 0.013 | 1 | 0.9082   |
| rs637563     | 11 | 118575479 | G | A | 2.57   | 0.01016 | ++ | 0      | 0.013 | 1 | 0.9082   |
| rs638514     | 11 | 118575693 | C | T | 2.57   | 0.01016 | ++ | 0      | 0.013 | 1 | 0.9082   |
| rs676925     | 11 | 118765688 | G | C | -2.567 | 0.01026 | -- | -193.2 | 1.023 | 1 | 0.3118   |
| rs576283     | 11 | 118573894 | G | A | 2.566  | 0.01029 | ++ | 0      | 0.014 | 1 | 0.9062   |
| rs1334757891 | 11 | 120850004 | T | C | 2.562  | 0.01041 | +  | 0      | 0     | 0 | 1        |
| rs531852     | 11 | 116228699 | C | A | -2.557 | 0.01057 | -- | 54.9   | 6.653 | 1 | 0.009898 |
| rs534437     | 11 | 116222378 | A | G | -2.553 | 0.01067 | -- | 45.9   | 5.549 | 1 | 0.01849  |
| rs78832854   | 11 | 116774475 | A | T | -2.551 | 0.01074 | -- | 0      | 0.061 | 1 | 0.8054   |
| rs7119734    | 11 | 117363066 | T | C | -2.548 | 0.01082 | -? | 0      | 0     | 0 | 1        |
| rs537080     | 11 | 118826045 | C | T | -2.548 | 0.01083 | -- | 0      | 0.974 | 1 | 0.3237   |
| rs77349713   | 11 | 116765476 | C | T | -2.548 | 0.01084 | -- | 0      | 0.062 | 1 | 0.8039   |
| rs117560784  | 11 | 117811037 | A | G | 2.547  | 0.01085 | +  | 0      | 0     | 0 | 1        |
| rs12292278   | 11 | 116758693 | C | A | -2.544 | 0.01097 | -- | 0      | 0.009 | 1 | 0.9224   |
| rs12718462   | 11 | 116705719 | C | T | -2.543 | 0.01098 | -- | 0      | 0.085 | 1 | 0.77     |
| rs117764543  | 11 | 120454129 | G | T | 2.542  | 0.01101 | +  | 0      | 0     | 0 | 1        |
| rs7130068    | 11 | 117366973 | C | T | -2.541 | 0.01104 | -? | 0      | 0     | 0 | 1        |
| rs58080742   | 11 | 117350621 | A | C | -2.541 | 0.01106 | -? | 0      | 0     | 0 | 1        |
| rs1228933145 | 11 | 117291266 | G | T | 2.54   | 0.01107 | +  | 0      | 0     | 0 | 1        |
| rs73592158   | 11 | 117291144 | A | G | 2.54   | 0.01107 | +  | 0      | 0     | 0 | 1        |
| rs61901410   | 11 | 118661197 | G | C | 2.54   | 0.01108 | ++ | -112.5 | 1.412 | 1 | 0.2347   |
| rs11820562   | 11 | 117293463 | G | A | 2.539  | 0.01111 | +  | 0      | 0     | 0 | 1        |
| rs11215924   | 11 | 116289906 | A | T | -2.536 | 0.01122 | -? | 0      | 0     | 0 | 1        |
| rs7123652    | 11 | 117377518 | C | T | -2.533 | 0.01132 | -? | 0      | 0     | 0 | 1        |
| rs139132354  | 11 | 117274521 | A | T | 2.529  | 0.01145 | +  | 0      | 0     | 0 | 1        |
| rs2076965    | 11 | 117405696 | A | T | -2.527 | 0.01152 | -? | 0      | 0     | 0 | 1        |
| rs564591     | 11 | 116223363 | G | A | -2.522 | 0.01168 | -- | 64.8   | 8.519 | 1 | 0.003514 |
| rs556437     | 11 | 118705753 | A | G | 2.521  | 0.01171 | +  | 0      | 0     | 0 | 1        |
| rs74881320   | 11 | 116765925 | C | A | -2.517 | 0.01185 | -- | 0      | 0.071 | 1 | 0.7901   |
| rs76887844   | 11 | 116281175 | T | C | -2.515 | 0.01189 | -? | 0      | 0     | 0 | 1        |
| rs10892047   | 11 | 116793693 | T | C | -2.515 | 0.0119  | -- | 0      | 0.11  | 1 | 0.7406   |
| rs79763467   | 11 | 117259782 | A | G | 2.514  | 0.01193 | +  | 0      | 0     | 0 | 1        |
| rs77280285   | 11 | 118091258 | G | C | 2.513  | 0.01197 | ++ | 45     | 5.452 | 1 | 0.01955  |
| rs7111427    | 11 | 117534083 | A | G | 2.512  | 0.01201 | +  | 0      | 0     | 0 | 1        |
| rs78049971   | 11 | 117284721 | T | C | 2.512  | 0.01202 | +  | 0      | 0     | 0 | 1        |
| rs79770727   | 11 | 117441594 | A | G | -2.511 | 0.01204 | -? | 0      | 0     | 0 | 1        |
| rs1053095947 | 11 | 116832718 | A | C | -2.508 | 0.01213 | -- | 0      | 0.112 | 1 | 0.7377   |
| rs10892050   | 11 | 116816394 | A | C | -2.508 | 0.01213 | -- | 0      | 0.112 | 1 | 0.7377   |
| rs11216193   | 11 | 116815599 | T | C | -2.508 | 0.01213 | -- | 0      | 0.112 | 1 | 0.7377   |

|             |    |           |   |   |        |         |    |   |       |   |        |
|-------------|----|-----------|---|---|--------|---------|----|---|-------|---|--------|
| rs11216194  | 11 | 116815738 | C | G | -2.508 | 0.01213 | -- | 0 | 0.112 | 1 | 0.7377 |
| rs11216197  | 11 | 116816778 | G | A | -2.508 | 0.01213 | -- | 0 | 0.112 | 1 | 0.7377 |
| rs11216199  | 11 | 116831016 | T | C | -2.508 | 0.01213 | -- | 0 | 0.112 | 1 | 0.7377 |
| rs116597701 | 11 | 116811487 | G | C | -2.508 | 0.01213 | -- | 0 | 0.112 | 1 | 0.7377 |
| rs12270837  | 11 | 116826643 | C | A | -2.508 | 0.01213 | -- | 0 | 0.112 | 1 | 0.7377 |
| rs12270974  | 11 | 116804005 | T | C | -2.508 | 0.01213 | -- | 0 | 0.112 | 1 | 0.7377 |
| rs12272491  | 11 | 116804370 | T | C | -2.508 | 0.01213 | -- | 0 | 0.112 | 1 | 0.7377 |
| rs12273769  | 11 | 116807173 | G | T | -2.508 | 0.01213 | -- | 0 | 0.112 | 1 | 0.7377 |
| rs12275355  | 11 | 116824162 | G | A | -2.508 | 0.01213 | -- | 0 | 0.112 | 1 | 0.7377 |
| rs12285956  | 11 | 116797475 | A | G | -2.508 | 0.01213 | -- | 0 | 0.112 | 1 | 0.7377 |
| rs12289974  | 11 | 116824286 | T | C | -2.508 | 0.01213 | -- | 0 | 0.112 | 1 | 0.7377 |
| rs12291040  | 11 | 116826617 | C | T | -2.508 | 0.01213 | -- | 0 | 0.112 | 1 | 0.7377 |
| rs12292371  | 11 | 116795948 | C | G | -2.508 | 0.01213 | -- | 0 | 0.112 | 1 | 0.7377 |
| rs12292434  | 11 | 116796065 | A | G | -2.508 | 0.01213 | -- | 0 | 0.112 | 1 | 0.7377 |
| rs12293755  | 11 | 116819264 | T | A | -2.508 | 0.01213 | -- | 0 | 0.112 | 1 | 0.7377 |
| rs12294657  | 11 | 116807368 | C | G | -2.508 | 0.01213 | -- | 0 | 0.112 | 1 | 0.7377 |
| rs12418735  | 11 | 116804762 | G | T | -2.508 | 0.01213 | -- | 0 | 0.112 | 1 | 0.7377 |
| rs12419047  | 11 | 116819906 | A | G | -2.508 | 0.01213 | -- | 0 | 0.112 | 1 | 0.7377 |
| rs12419437  | 11 | 116820690 | A | G | -2.508 | 0.01213 | -- | 0 | 0.112 | 1 | 0.7377 |
| rs12421834  | 11 | 116820023 | C | A | -2.508 | 0.01213 | -- | 0 | 0.112 | 1 | 0.7377 |
| rs12421902  | 11 | 116814646 | G | A | -2.508 | 0.01213 | -- | 0 | 0.112 | 1 | 0.7377 |
| rs17120157  | 11 | 116812628 | C | T | -2.508 | 0.01213 | -- | 0 | 0.112 | 1 | 0.7377 |
| rs2289890   | 11 | 116824620 | A | G | -2.508 | 0.01213 | -- | 0 | 0.112 | 1 | 0.7377 |
| rs2289892   | 11 | 116825240 | A | G | -2.508 | 0.01213 | -- | 0 | 0.112 | 1 | 0.7377 |
| rs74615346  | 11 | 116802972 | C | A | -2.508 | 0.01213 | -- | 0 | 0.112 | 1 | 0.7377 |
| rs7480278   | 11 | 116809789 | G | T | -2.508 | 0.01213 | -- | 0 | 0.112 | 1 | 0.7377 |
| rs75410648  | 11 | 116813438 | T | C | -2.508 | 0.01213 | -- | 0 | 0.112 | 1 | 0.7377 |
| rs75776964  | 11 | 116801061 | G | C | -2.508 | 0.01213 | -- | 0 | 0.112 | 1 | 0.7377 |
| rs76146269  | 11 | 116823617 | G | A | -2.508 | 0.01213 | -- | 0 | 0.112 | 1 | 0.7377 |
| rs76654964  | 11 | 116823521 | A | G | -2.508 | 0.01213 | -- | 0 | 0.112 | 1 | 0.7377 |
| rs77136879  | 11 | 116808453 | T | C | -2.508 | 0.01213 | -- | 0 | 0.112 | 1 | 0.7377 |
| rs77467134  | 11 | 116823107 | C | T | -2.508 | 0.01213 | -- | 0 | 0.112 | 1 | 0.7377 |
| rs78066444  | 11 | 116812058 | C | A | -2.508 | 0.01213 | -- | 0 | 0.112 | 1 | 0.7377 |
| rs79157715  | 11 | 116800270 | A | G | -2.508 | 0.01213 | -- | 0 | 0.112 | 1 | 0.7377 |
| rs80015203  | 11 | 116810906 | G | A | -2.508 | 0.01213 | -- | 0 | 0.112 | 1 | 0.7377 |
| rs58566212  | 11 | 116290501 | T | C | -2.508 | 0.01215 | -? | 0 | 0     | 0 | 1      |
| rs480823    | 11 | 116525730 | C | T | 2.506  | 0.0122  | +  | 0 | 0     | 0 | 1      |
| rs142174850 | 11 | 116715784 | A | G | -2.504 | 0.01226 | -- | 0 | 0.009 | 1 | 0.9243 |
| rs16867     | 11 | 117521967 | C | T | -2.503 | 0.01231 | -? | 0 | 0     | 0 | 1      |
| rs670413    | 11 | 120858914 | A | G | 2.501  | 0.0124  | +  | 0 | 0     | 0 | 1      |
| rs78692246  | 11 | 116791307 | A | G | -2.5   | 0.01242 | -- | 0 | 0.115 | 1 | 0.734  |
| rs12574158  | 11 | 117356276 | G | C | -2.498 | 0.01248 | -? | 0 | 0     | 0 | 1      |
| rs35184536  | 11 | 116778813 | G | A | -2.498 | 0.0125  | -- | 0 | 0.069 | 1 | 0.7921 |
| rs73008432  | 11 | 117378004 | T | C | 2.497  | 0.01252 | +  | 0 | 0     | 0 | 1      |
| rs12280030  | 11 | 116775196 | A | T | -2.495 | 0.01258 | -- | 0 | 0.077 | 1 | 0.7808 |
| rs17120131  | 11 | 116772486 | C | T | -2.495 | 0.01258 | -- | 0 | 0.077 | 1 | 0.7808 |
| rs17120132  | 11 | 116773318 | A | T | -2.495 | 0.01258 | -- | 0 | 0.077 | 1 | 0.7808 |
| rs17120136  | 11 | 116773761 | G | T | -2.495 | 0.01258 | -- | 0 | 0.077 | 1 | 0.7808 |
| rs151131966 | 11 | 116941555 | A | G | -2.495 | 0.0126  | -? | 0 | 0     | 0 | 1      |
| rs481843    | 11 | 116525867 | T | C | 2.495  | 0.01261 | +  | 0 | 0     | 0 | 1      |
| rs2127907   | 11 | 116981580 | A | G | 2.493  | 0.01265 | +  | 0 | 0     | 0 | 1      |
| rs6589596   | 11 | 116993181 | T | C | 2.491  | 0.01274 | +  | 0 | 0     | 0 | 1      |
| rs1942010   | 11 | 119918191 | C | T | 2.49   | 0.01278 | +  | 0 | 0     | 0 | 1      |
| rs12277181  | 11 | 116787320 | A | G | -2.489 | 0.0128  | -- | 0 | 0.079 | 1 | 0.7781 |
| rs115971514 | 11 | 116774499 | C | G | -2.488 | 0.01285 | -- | 0 | 0.08  | 1 | 0.7775 |
| rs78694306  | 11 | 116774244 | T | G | -2.488 | 0.01285 | -- | 0 | 0.08  | 1 | 0.7775 |

|             |    |           |   |   |        |         |    |        |       |   |         |
|-------------|----|-----------|---|---|--------|---------|----|--------|-------|---|---------|
| rs17120177  | 11 | 116827369 | C | T | -2.484 | 0.013   | -- | 0      | 0.033 | 1 | 0.8562  |
| rs112939258 | 11 | 118834718 | T | C | -2.483 | 0.01304 | -- | -130   | 1.304 | 1 | 0.2534  |
| rs149153426 | 11 | 116638657 | G | T | 2.482  | 0.01306 | +? | 0      | 0     | 0 | 1       |
| rs12273762  | 11 | 116777063 | A | T | -2.481 | 0.0131  | -- | 0      | 0.082 | 1 | 0.7745  |
| rs9651681   | 11 | 116778065 | C | T | -2.481 | 0.0131  | -- | 0      | 0.082 | 1 | 0.7745  |
| rs11216185  | 11 | 116782974 | G | T | -2.481 | 0.01311 | -- | 0      | 0.082 | 1 | 0.7743  |
| rs4420286   | 11 | 119922006 | A | G | 2.477  | 0.01325 | +? | 0      | 0     | 0 | 1       |
| rs1452843   | 11 | 119921117 | T | C | 2.473  | 0.01341 | +? | 0      | 0     | 0 | 1       |
| rs553449    | 11 | 116222849 | A | G | -2.472 | 0.01344 | -- | 48     | 5.771 | 1 | 0.01629 |
| rs501755    | 11 | 116224621 | T | C | -2.471 | 0.01346 | -- | -18.1  | 2.54  | 1 | 0.111   |
| rs71480306  | 11 | 116515557 | C | T | 2.471  | 0.01346 | +? | 0      | 0     | 0 | 1       |
| rs543819    | 11 | 116750073 | G | A | -2.47  | 0.01352 | -- | 0      | 0.373 | 1 | 0.5414  |
| rs1790192   | 11 | 118757191 | G | A | -2.468 | 0.01358 | -- | -74.6  | 1.718 | 1 | 0.1899  |
| rs76675432  | 11 | 118103976 | T | C | 2.468  | 0.01358 | ++ | 44.5   | 5.406 | 1 | 0.02006 |
| rs1006176   | 11 | 116788133 | C | T | -2.466 | 0.01366 | -- | 0      | 0.087 | 1 | 0.7679  |
| rs11216186  | 11 | 116784692 | C | T | -2.466 | 0.01366 | -- | 0      | 0.087 | 1 | 0.7679  |
| rs12418208  | 11 | 116787633 | T | C | -2.466 | 0.01366 | -- | 0      | 0.087 | 1 | 0.7679  |
| rs12418209  | 11 | 116787641 | T | C | -2.466 | 0.01366 | -- | 0      | 0.087 | 1 | 0.7679  |
| rs79711490  | 11 | 116785341 | T | C | -2.466 | 0.01366 | -- | 0      | 0.087 | 1 | 0.7679  |
| rs12420857  | 11 | 116829442 | T | G | -2.465 | 0.01369 | -- | 0      | 0.129 | 1 | 0.7191  |
| rs878692    | 11 | 116828939 | A | C | -2.465 | 0.01369 | -- | 0      | 0.129 | 1 | 0.7191  |
| rs2252145   | 11 | 117102648 | C | T | 2.463  | 0.01378 | +? | 0      | 0     | 0 | 1       |
| rs11216943  | 11 | 118556398 | A | G | -2.459 | 0.01392 | -- | 0      | 0.479 | 1 | 0.4891  |
| rs75216569  | 11 | 116907715 | G | A | -2.458 | 0.01395 | -- | 0      | 0.051 | 1 | 0.821   |
| rs12273545  | 11 | 116911012 | T | C | -2.455 | 0.01411 | -- | 0      | 0.052 | 1 | 0.8192  |
| rs10128570  | 11 | 116854021 | G | A | -2.453 | 0.01415 | -- | 0      | 0.057 | 1 | 0.8113  |
| rs10128571  | 11 | 116854181 | G | A | -2.453 | 0.01415 | -- | 0      | 0.057 | 1 | 0.8113  |
| rs10128690  | 11 | 116853922 | A | G | -2.453 | 0.01415 | -- | 0      | 0.057 | 1 | 0.8113  |
| rs11216209  | 11 | 116848186 | C | T | -2.453 | 0.01415 | -- | 0      | 0.057 | 1 | 0.8113  |
| rs11216212  | 11 | 116850351 | A | T | -2.453 | 0.01415 | -- | 0      | 0.057 | 1 | 0.8113  |
| rs11216215  | 11 | 116852687 | A | T | -2.453 | 0.01415 | -- | 0      | 0.057 | 1 | 0.8113  |
| rs11216217  | 11 | 116857652 | A | G | -2.453 | 0.01415 | -- | 0      | 0.057 | 1 | 0.8113  |
| rs11216218  | 11 | 116862661 | T | C | -2.453 | 0.01415 | -- | 0      | 0.057 | 1 | 0.8113  |
| rs11216219  | 11 | 116862755 | T | C | -2.453 | 0.01415 | -- | 0      | 0.057 | 1 | 0.8113  |
| rs12274771  | 11 | 116856698 | G | C | -2.453 | 0.01415 | -- | 0      | 0.057 | 1 | 0.8113  |
| rs12274773  | 11 | 116856709 | T | C | -2.453 | 0.01415 | -- | 0      | 0.057 | 1 | 0.8113  |
| rs12287768  | 11 | 116856322 | C | A | -2.453 | 0.01415 | -- | 0      | 0.057 | 1 | 0.8113  |
| rs146178826 | 11 | 116851367 | G | A | -2.453 | 0.01415 | -- | 0      | 0.057 | 1 | 0.8113  |
| rs74927399  | 11 | 116846266 | C | T | -2.453 | 0.01415 | -- | 0      | 0.057 | 1 | 0.8113  |
| rs75212922  | 11 | 116856992 | A | T | -2.453 | 0.01415 | -- | 0      | 0.057 | 1 | 0.8113  |
| rs76949321  | 11 | 116846343 | A | G | -2.453 | 0.01415 | -- | 0      | 0.057 | 1 | 0.8113  |
| rs80242245  | 11 | 116862245 | G | C | -2.453 | 0.01415 | -- | 0      | 0.057 | 1 | 0.8113  |
| rs10502220  | 11 | 116409093 | C | T | -2.453 | 0.01418 | -? | 0      | 0     | 0 | 1       |
| rs6589597   | 11 | 116997798 | C | T | 2.452  | 0.01419 | +? | 0      | 0     | 0 | 1       |
| rs149602720 | 11 | 119404234 | G | A | -2.452 | 0.01422 | -? | 0      | 0     | 0 | 1       |
| rs75890305  | 11 | 116919969 | G | A | -2.452 | 0.01422 | -- | 0      | 0.053 | 1 | 0.8179  |
| rs565578    | 11 | 116223503 | C | T | -2.451 | 0.01426 | -- | 53.8   | 6.489 | 1 | 0.01085 |
| rs478015    | 11 | 120861279 | G | T | 2.448  | 0.01436 | +? | 0      | 0     | 0 | 1       |
| rs949054    | 11 | 120795888 | C | T | 2.448  | 0.01438 | +? | 0      | 0     | 0 | 1       |
| rs10892316  | 11 | 118831755 | T | C | -2.447 | 0.01441 | -- | -158.2 | 1.162 | 1 | 0.2811  |
| rs12289032  | 11 | 116899580 | T | C | -2.447 | 0.01442 | -- | 0      | 0.054 | 1 | 0.8157  |
| rs146943088 | 11 | 116899825 | C | A | -2.447 | 0.01442 | -- | 0      | 0.054 | 1 | 0.8157  |
| rs2186844   | 11 | 116896913 | T | C | -2.447 | 0.01442 | -- | 0      | 0.054 | 1 | 0.8157  |
| rs77594377  | 11 | 116892446 | A | G | -2.447 | 0.01442 | -- | 0      | 0.054 | 1 | 0.8157  |
| rs77955134  | 11 | 116892368 | A | G | -2.447 | 0.01442 | -- | 0      | 0.054 | 1 | 0.8157  |
| rs12274590  | 11 | 116805696 | A | G | -2.445 | 0.01447 | -- | 0      | 0.138 | 1 | 0.7106  |

|              |    |           |   |   |        |         |    |      |       |   |          |
|--------------|----|-----------|---|---|--------|---------|----|------|-------|---|----------|
| rs79207844   | 11 | 116805441 | A | G | -2.445 | 0.01447 | -- | 0    | 0.138 | 1 | 0.7106   |
| rs516503     | 11 | 118580348 | T | C | 2.445  | 0.0145  | ++ | 0    | 0     | 1 | 0.9951   |
| rs596869     | 11 | 120861145 | T | A | 2.444  | 0.01453 | +? | 0    | 0     | 0 | 1        |
| rs147413777  | 11 | 117802888 | A | G | 2.444  | 0.01454 | +? | 0    | 0     | 0 | 1        |
| rs80273401   | 11 | 116908706 | C | T | -2.442 | 0.0146  | -- | 0    | 0.056 | 1 | 0.8137   |
| rs201134460  | 11 | 118550524 | T | C | -2.441 | 0.01466 | -- | 0    | 0.405 | 1 | 0.5243   |
| rs569304     | 11 | 116219447 | A | G | -2.44  | 0.01467 | -- | 51.3 | 6.159 | 1 | 0.01308  |
| rs11216250   | 11 | 116924000 | T | C | -2.44  | 0.0147  | -- | 0    | 0.056 | 1 | 0.8126   |
| rs12280172   | 11 | 116919273 | A | G | -2.44  | 0.0147  | -- | 0    | 0.056 | 1 | 0.8126   |
| rs77999164   | 11 | 116912117 | T | C | -2.44  | 0.0147  | -- | 0    | 0.056 | 1 | 0.8126   |
| rs12278943   | 11 | 116874358 | C | T | -2.439 | 0.01472 | -- | 0    | 0.061 | 1 | 0.805    |
| rs138181556  | 11 | 116879723 | A | G | -2.439 | 0.01472 | -- | 0    | 0.061 | 1 | 0.805    |
| rs10892252   | 11 | 118555692 | G | A | -2.438 | 0.01476 | -- | 0    | 0.526 | 1 | 0.4683   |
| rs598582     | 11 | 120860814 | G | A | 2.437  | 0.01481 | +? | 0    | 0     | 0 | 1        |
| rs10160799   | 11 | 116977888 | G | A | 2.437  | 0.01482 | +? | 0    | 0     | 0 | 1        |
| rs193204541  | 11 | 116550916 | G | C | -2.436 | 0.01486 | -? | 0    | 0     | 0 | 1        |
| rs536333     | 11 | 120860200 | C | T | 2.433  | 0.01497 | +? | 0    | 0     | 0 | 1        |
| rs560092     | 11 | 120860499 | G | A | 2.433  | 0.01497 | +? | 0    | 0     | 0 | 1        |
| rs611065     | 11 | 120860288 | C | A | 2.433  | 0.01497 | +? | 0    | 0     | 0 | 1        |
| rs565597     | 11 | 120861094 | C | T | 2.433  | 0.01498 | +? | 0    | 0     | 0 | 1        |
| rs552104     | 11 | 116219158 | G | T | -2.432 | 0.01503 | -- | 51.6 | 6.203 | 1 | 0.01275  |
| rs7938710    | 11 | 117292208 | T | C | 2.428  | 0.01519 | +? | 0    | 0     | 0 | 1        |
| rs34552724   | 11 | 116647152 | C | T | 2.427  | 0.01522 | +? | 0    | 0     | 0 | 1        |
| rs478081     | 11 | 118602497 | G | A | -2.427 | 0.01522 | -- | 0    | 0.004 | 1 | 0.9528   |
| rs61213686   | 11 | 117461888 | C | T | -2.424 | 0.01535 | -? | 0    | 0     | 0 | 1        |
| rs7112513    | 11 | 117037361 | A | G | 2.424  | 0.01536 | +? | 0    | 0     | 0 | 1        |
| rs10750101   | 11 | 116979689 | T | C | 2.423  | 0.0154  | +? | 0    | 0     | 0 | 1        |
| rs58949729   | 11 | 117370831 | T | G | -2.423 | 0.01541 | -? | 0    | 0     | 0 | 1        |
| rs12721025   | 11 | 116706047 | A | G | -2.422 | 0.01544 | -- | 0    | 0.063 | 1 | 0.8011   |
| rs2509656    | 11 | 119208576 | A | G | -2.422 | 0.01545 | -? | 0    | 0     | 0 | 1        |
| rs17120373   | 11 | 117003459 | G | A | -2.421 | 0.01547 | -? | 0    | 0     | 0 | 1        |
| rs12277092   | 11 | 116787327 | T | C | -2.42  | 0.01552 | -- | 0    | 0.103 | 1 | 0.7479   |
| rs656015     | 11 | 119913501 | A | G | 2.419  | 0.01556 | +? | 0    | 0     | 0 | 1        |
| rs10892121   | 11 | 117343197 | C | T | -2.419 | 0.01557 | -? | 0    | 0     | 0 | 1        |
| rs2471884    | 11 | 117010320 | T | C | 2.418  | 0.01559 | +? | 0    | 0     | 0 | 1        |
| rs2266133    | 11 | 120413124 | C | T | 2.418  | 0.01561 | +? | 0    | 0     | 0 | 1        |
| rs11218014   | 11 | 120689582 | A | G | 2.416  | 0.01568 | +? | 0    | 0     | 0 | 1        |
| rs1482242286 | 11 | 117263616 | G | T | 2.414  | 0.01576 | +? | 0    | 0     | 0 | 1        |
| rs117901629  | 11 | 116879679 | A | G | -2.413 | 0.01581 | -- | 0    | 0.008 | 1 | 0.9275   |
| rs4291686    | 11 | 118700557 | G | A | 2.411  | 0.01589 | +? | 0    | 0     | 0 | 1        |
| rs11216204   | 11 | 116839614 | A | G | -2.41  | 0.01594 | -- | 0    | 0.069 | 1 | 0.7922   |
| rs12272305   | 11 | 116839938 | A | G | -2.41  | 0.01594 | -- | 0    | 0.069 | 1 | 0.7922   |
| rs12281729   | 11 | 116838130 | C | A | -2.41  | 0.01594 | -- | 0    | 0.069 | 1 | 0.7922   |
| rs12417152   | 11 | 116839293 | C | G | -2.41  | 0.01594 | -- | 0    | 0.069 | 1 | 0.7922   |
| rs595851     | 11 | 120861385 | A | G | 2.41   | 0.01594 | +? | 0    | 0     | 0 | 1        |
| rs562059     | 11 | 118602058 | G | T | -2.41  | 0.01596 | -- | 0    | 0.004 | 1 | 0.951    |
| rs579706     | 11 | 116223405 | G | T | -2.408 | 0.01603 | -- | 54.9 | 6.652 | 1 | 0.009904 |
| rs12418324   | 11 | 116842676 | T | C | -2.407 | 0.0161  | -- | 0    | 0.07  | 1 | 0.7907   |
| rs478693     | 11 | 117263103 | C | T | 2.406  | 0.01612 | +? | 0    | 0     | 0 | 1        |
| rs77204473   | 11 | 116805064 | G | T | -2.405 | 0.01619 | -- | 0    | 0.043 | 1 | 0.8357   |
| rs4609639    | 11 | 117408890 | C | T | 2.404  | 0.0162  | +? | 0    | 0     | 0 | 1        |
| rs496058     | 11 | 118580906 | G | A | 2.402  | 0.01631 | ++ | 0    | 0.002 | 1 | 0.9672   |
| rs575636     | 11 | 116234032 | G | A | -2.396 | 0.01658 | -- | 0    | 0.422 | 1 | 0.5159   |
| rs625274     | 11 | 118699276 | T | C | 2.394  | 0.01668 | +? | 0    | 0     | 0 | 1        |
| rs7131536    | 11 | 116999446 | C | T | 2.393  | 0.01669 | +? | 0    | 0     | 0 | 1        |
| rs7131686    | 11 | 116999559 | C | T | 2.393  | 0.01669 | +? | 0    | 0     | 0 | 1        |

|              |    |           |   |   |        |         |    |        |       |   |         |
|--------------|----|-----------|---|---|--------|---------|----|--------|-------|---|---------|
| rs61277802   | 11 | 117405785 | A | G | 2.392  | 0.01677 | +  | 0      | 0     | 0 | 1       |
| rs111491960  | 11 | 118833458 | G | A | 2.39   | 0.01685 | +  | 0      | 0     | 0 | 1       |
| rs2248853    | 11 | 119207446 | T | C | -2.39  | 0.01685 | -  | 0      | 0     | 0 | 1       |
| rs2248863    | 11 | 119207341 | A | G | -2.39  | 0.01685 | -  | 0      | 0     | 0 | 1       |
| rs9640       | 11 | 119209979 | A | T | -2.389 | 0.01688 | -  | 0      | 0     | 0 | 1       |
| rs607800     | 11 | 120863568 | T | C | 2.388  | 0.01696 | +  | 0      | 0     | 0 | 1       |
| rs10892319   | 11 | 118870413 | T | C | -2.387 | 0.01697 | -- | 0      | 0.771 | 1 | 0.3799  |
| rs77544215   | 11 | 116292287 | T | C | -2.384 | 0.01712 | -  | 0      | 0     | 0 | 1       |
| rs10892082   | 11 | 117039325 | T | G | 2.383  | 0.01715 | +  | 0      | 0     | 0 | 1       |
| rs474806     | 11 | 117196020 | T | C | -2.381 | 0.01725 | -  | 0      | 0     | 0 | 1       |
| rs184071181  | 11 | 118598936 | C | T | 2.38   | 0.0173  | ++ | 0      | 0.864 | 1 | 0.3525  |
| rs7940310    | 11 | 117024481 | T | C | 2.379  | 0.01734 | +  | 0      | 0     | 0 | 1       |
| rs478350     | 11 | 116233829 | T | C | -2.379 | 0.01735 | -- | 0      | 0.08  | 1 | 0.7778  |
| rs2581477    | 11 | 116218868 | A | G | -2.376 | 0.01751 | -- | 52.8   | 6.352 | 1 | 0.01172 |
| rs693448     | 11 | 116218926 | C | A | -2.376 | 0.01751 | -- | 52.8   | 6.352 | 1 | 0.01172 |
| rs1135663    | 11 | 116788837 | T | C | -2.375 | 0.01753 | -- | 0      | 0.128 | 1 | 0.7204  |
| rs7118201    | 11 | 116409112 | C | T | -2.375 | 0.01756 | -  | 0      | 0     | 0 | 1       |
| rs111358668  | 11 | 118834508 | A | G | -2.372 | 0.01771 | -- | -125.3 | 1.332 | 1 | 0.2485  |
| rs11216316   | 11 | 117081500 | C | A | 2.369  | 0.01782 | +  | 0      | 0     | 0 | 1       |
| rs78277728   | 11 | 116291283 | G | C | -2.369 | 0.01784 | -  | 0      | 0     | 0 | 1       |
| rs556194     | 11 | 116223171 | C | A | -2.368 | 0.01786 | -- | 53.6   | 6.461 | 1 | 0.01103 |
| rs79663212   | 11 | 116296917 | T | G | -2.368 | 0.01788 | -  | 0      | 0     | 0 | 1       |
| rs1320668    | 11 | 116967666 | C | T | 2.366  | 0.01798 | +  | 0      | 0     | 0 | 1       |
| rs12221530   | 11 | 120732349 | T | C | -2.365 | 0.01805 | -  | 0      | 0     | 0 | 1       |
| rs61900593   | 11 | 117937348 | G | A | 2.364  | 0.01809 | +  | 0      | 0     | 0 | 1       |
| rs7123517    | 11 | 117027755 | G | A | 2.364  | 0.01809 | +  | 0      | 0     | 0 | 1       |
| rs1395475712 | 11 | 117364120 | T | C | -2.364 | 0.0181  | -  | 0      | 0     | 0 | 1       |
| rs11215925   | 11 | 116290834 | C | T | -2.361 | 0.01824 | -  | 0      | 0     | 0 | 1       |
| rs7948838    | 11 | 116792961 | G | A | -2.36  | 0.01828 | +  | -2.5   | 2.926 | 1 | 0.08716 |
| rs10128682   | 11 | 116863458 | T | C | -2.357 | 0.0184  | -- | 0      | 0.032 | 1 | 0.8583  |
| rs12718464   | 11 | 116707401 | A | G | -2.355 | 0.01854 | -- | 0      | 0.087 | 1 | 0.7684  |
| rs2277296    | 11 | 118550522 | C | T | -2.354 | 0.01858 | -- | 0      | 0.235 | 1 | 0.6278  |
| rs11826885   | 11 | 117401657 | T | C | 2.352  | 0.01867 | +  | 0      | 0     | 0 | 1       |
| rs11604866   | 11 | 116867514 | T | C | -2.351 | 0.01871 | -- | 0      | 0.033 | 1 | 0.8554  |
| rs74460214   | 11 | 116865207 | C | T | -2.351 | 0.01871 | -- | 0      | 0.033 | 1 | 0.8554  |
| rs75826529   | 11 | 116865100 | A | T | -2.351 | 0.01871 | -- | 0      | 0.033 | 1 | 0.8554  |
| rs79349393   | 11 | 116865367 | G | A | -2.351 | 0.01871 | -- | 0      | 0.033 | 1 | 0.8554  |
| rs7481286    | 11 | 116902372 | T | G | -2.351 | 0.01872 | -- | 0      | 0.03  | 1 | 0.8627  |
| rs541874     | 11 | 116240253 | T | C | -2.349 | 0.01884 | -- | 0      | 0.337 | 1 | 0.5615  |
| rs7930881    | 11 | 117350320 | A | G | -2.348 | 0.01885 | -  | 0      | 0     | 0 | 1       |
| rs2071381    | 11 | 118214267 | A | G | -2.347 | 0.01893 | -- | 0      | 0.399 | 1 | 0.5276  |
| rs1426560348 | 11 | 116913570 | A | C | -2.344 | 0.01907 | -- | 0      | 0.031 | 1 | 0.8596  |
| rs525493     | 11 | 117182708 | G | T | 2.344  | 0.0191  | +  | 0      | 0     | 0 | 1       |
| rs10892056   | 11 | 116870411 | C | G | -2.343 | 0.01911 | -- | 0      | 0.035 | 1 | 0.8519  |
| rs11216226   | 11 | 116878066 | G | C | -2.343 | 0.01911 | -- | 0      | 0.035 | 1 | 0.8519  |
| rs12276805   | 11 | 116878759 | C | T | -2.343 | 0.01911 | -- | 0      | 0.035 | 1 | 0.8519  |
| rs4604928    | 11 | 117044203 | C | A | 2.343  | 0.01911 | +  | 0      | 0     | 0 | 1       |
| rs4936367    | 11 | 117042377 | G | A | 2.343  | 0.01911 | +  | 0      | 0     | 0 | 1       |
| rs2155094    | 11 | 120849685 | A | G | -2.34  | 0.01928 | -  | 0      | 0     | 0 | 1       |
| rs536447     | 11 | 120860238 | T | C | 2.34   | 0.01929 | +  | 0      | 0     | 0 | 1       |
| rs12286920   | 11 | 117364821 | A | G | -2.339 | 0.01935 | -  | 0      | 0     | 0 | 1       |
| rs79870586   | 11 | 116886721 | A | G | -2.337 | 0.01944 | -- | 0      | 0.033 | 1 | 0.8564  |
| rs80054374   | 11 | 116890667 | G | A | -2.337 | 0.01944 | -- | 0      | 0.033 | 1 | 0.8564  |
| rs7122944    | 11 | 117034619 | G | T | 2.336  | 0.01947 | +  | 0      | 0     | 0 | 1       |
| rs73004983   | 11 | 119572124 | C | G | 2.336  | 0.01948 | +  | 0      | 0     | 0 | 1       |
| rs501652     | 11 | 116240625 | G | A | -2.336 | 0.01949 | -- | 0      | 0.338 | 1 | 0.561   |

|             |    |           |   |   |        |         |    |        |       |   |         |
|-------------|----|-----------|---|---|--------|---------|----|--------|-------|---|---------|
| rs55965073  | 11 | 117936239 | C | T | 2.335  | 0.01956 | +  | 0      | 0     | 0 | 1       |
| rs150792202 | 11 | 118652569 | A | G | 2.334  | 0.01961 | ++ | 0      | 0.945 | 1 | 0.3311  |
| rs7950633   | 11 | 117024302 | C | T | 2.332  | 0.01968 | +  | 0      | 0     | 0 | 1       |
| rs76253444  | 11 | 118876213 | G | A | -2.331 | 0.01977 | -- | 0      | 0.901 | 1 | 0.3425  |
| rs114287696 | 11 | 117037080 | G | A | -2.33  | 0.01979 | -? | 0      | 0     | 0 | 1       |
| rs7925256   | 11 | 117045335 | T | C | 2.33   | 0.01979 | +  | 0      | 0     | 0 | 1       |
| rs55900121  | 11 | 117353812 | T | C | -2.33  | 0.01981 | -? | 0      | 0     | 0 | 1       |
| rs4938576   | 11 | 118746769 | T | G | -2.328 | 0.01989 | -- | -126.2 | 1.326 | 1 | 0.2494  |
| rs11216859  | 11 | 118238119 | C | T | -2.327 | 0.01999 | -- | 0      | 0.297 | 1 | 0.5856  |
| rs9645663   | 11 | 118873840 | C | T | -2.326 | 0.02    | -- | 0      | 0.759 | 1 | 0.3838  |
| rs117033797 | 11 | 116951943 | G | T | -2.326 | 0.02002 | -? | 0      | 0     | 0 | 1       |
| rs524968    | 11 | 117368805 | A | G | 2.325  | 0.02007 | +  | 0      | 0     | 0 | 1       |
| rs583161    | 11 | 117180921 | T | C | -2.324 | 0.02014 | -? | 0      | 0     | 0 | 1       |
| rs10892049  | 11 | 116816216 | C | G | -2.315 | 0.02059 | +  | -6.1   | 2.827 | 1 | 0.0927  |
| rs12286405  | 11 | 116822528 | T | C | -2.315 | 0.02059 | +  | -6.1   | 2.827 | 1 | 0.0927  |
| rs12292858  | 11 | 116813979 | C | A | -2.315 | 0.02059 | +  | -6.1   | 2.827 | 1 | 0.0927  |
| rs12420518  | 11 | 116820088 | C | T | -2.315 | 0.02059 | +  | -6.1   | 2.827 | 1 | 0.0927  |
| rs191655881 | 11 | 116817655 | C | A | -2.315 | 0.02059 | +  | -6.1   | 2.827 | 1 | 0.0927  |
| rs11216190  | 11 | 116797684 | C | T | -2.314 | 0.02068 | +  | -5.8   | 2.836 | 1 | 0.09215 |
| rs2581476   | 11 | 116218830 | A | G | -2.313 | 0.0207  | -- | 54.1   | 6.533 | 1 | 0.01059 |
| rs542821    | 11 | 117262598 | T | C | 2.313  | 0.0207  | +  | 0      | 0     | 0 | 1       |
| rs732403    | 11 | 117925812 | A | G | 2.311  | 0.02082 | +  | 0      | 0     | 0 | 1       |
| rs113611963 | 11 | 118839610 | G | T | 2.31   | 0.02089 | +  | 0      | 0     | 0 | 1       |
| rs61900594  | 11 | 117938377 | T | C | 2.31   | 0.02091 | +  | 0      | 0     | 0 | 1       |
| rs526151    | 11 | 116236775 | T | C | -2.309 | 0.02093 | -- | 0      | 0.464 | 1 | 0.4955  |
| rs140223477 | 11 | 116702630 | A | G | -2.307 | 0.02107 | -? | 0      | 0     | 0 | 1       |
| rs112746276 | 11 | 117352381 | T | A | -2.3   | 0.02145 | -? | 0      | 0     | 0 | 1       |
| rs598207    | 11 | 118765267 | C | G | -2.3   | 0.02147 | +  | -68.1  | 1.785 | 1 | 0.1816  |
| rs2127905   | 11 | 117026374 | A | C | 2.295  | 0.02176 | +  | 0      | 0     | 0 | 1       |
| rs2234668   | 11 | 116692324 | A | G | -2.294 | 0.02178 | -? | 0      | 0     | 0 | 1       |
| rs11826012  | 11 | 117285699 | C | T | 2.294  | 0.02179 | +  | 0      | 0     | 0 | 1       |
| rs1789157   | 11 | 117285746 | G | A | 2.294  | 0.02179 | +  | 0      | 0     | 0 | 1       |
| rs75676165  | 11 | 116199019 | A | G | -2.293 | 0.02185 | -? | 0      | 0     | 0 | 1       |
| rs4331109   | 11 | 120723057 | G | A | -2.292 | 0.0219  | -? | 0      | 0     | 0 | 1       |
| rs11216479  | 11 | 117514378 | T | C | -2.291 | 0.02199 | -? | 0      | 0     | 0 | 1       |
| rs10892251  | 11 | 118543563 | T | C | -2.289 | 0.02206 | -- | 0      | 0.281 | 1 | 0.5958  |
| rs12418858  | 11 | 116328380 | A | G | 2.288  | 0.02213 | +  | 0      | 0     | 0 | 1       |
| rs2155393   | 11 | 117350336 | A | G | -2.286 | 0.02227 | -? | 0      | 0     | 0 | 1       |
| rs2370114   | 11 | 121192292 | G | A | -2.286 | 0.02228 | -? | 0      | 0     | 0 | 1       |
| rs2155392   | 11 | 117407658 | C | G | 2.285  | 0.02234 | +  | 0      | 0     | 0 | 1       |
| rs506255    | 11 | 118566069 | A | C | 2.283  | 0.02242 | +  | -27.5  | 2.352 | 1 | 0.1251  |
| rs634606    | 11 | 117381052 | T | C | 2.282  | 0.0225  | +  | 0      | 0     | 0 | 1       |
| rs7115583   | 11 | 116784376 | T | G | -2.281 | 0.02252 | +  | 4.2    | 3.131 | 1 | 0.07682 |
| rs56198555  | 11 | 117404312 | T | C | 2.281  | 0.02254 | +  | 0      | 0     | 0 | 1       |
| rs554865    | 11 | 116219458 | T | C | -2.28  | 0.02262 | -- | 52.7   | 6.34  | 1 | 0.01181 |
| rs2270392   | 11 | 116767688 | C | T | -2.278 | 0.02273 | +  | 6.4    | 3.205 | 1 | 0.07342 |
| rs567559    | 11 | 116239742 | C | G | -2.277 | 0.0228  | -- | 0      | 0.043 | 1 | 0.836   |
| rs7111854   | 11 | 116776826 | T | A | -2.276 | 0.02283 | +  | 6.6    | 3.213 | 1 | 0.07306 |
| rs7128792   | 11 | 121005609 | G | A | 2.275  | 0.0229  | +  | 0      | 0     | 0 | 1       |
| rs2248540   | 11 | 120426966 | C | T | 2.274  | 0.02297 | +  | 0      | 0     | 0 | 1       |
| rs35168282  | 11 | 120715346 | A | G | -2.273 | 0.023   | -? | 0      | 0     | 0 | 1       |
| rs2252244   | 11 | 120418613 | G | A | 2.271  | 0.02317 | +  | 0      | 0     | 0 | 1       |
| rs73010348  | 11 | 117422690 | A | G | 2.269  | 0.02326 | +  | 0      | 0     | 0 | 1       |
| rs138471627 | 11 | 117296641 | T | C | 2.269  | 0.02329 | +  | 0      | 0     | 0 | 1       |
| rs11216210  | 11 | 116848329 | T | G | -2.268 | 0.02331 | +  | 3.5    | 3.109 | 1 | 0.07784 |
| rs7358350   | 11 | 116851608 | C | T | -2.268 | 0.02331 | +  | 3.5    | 3.109 | 1 | 0.07784 |

|             |    |           |   |   |        |         |    |       |       |   |         |
|-------------|----|-----------|---|---|--------|---------|----|-------|-------|---|---------|
| rs73015719  | 11 | 117938177 | A | G | 2.267  | 0.0234  | +  | 0     | 0     | 0 | 1       |
| rs573965    | 11 | 117283471 | T | C | 2.265  | 0.02349 | +  | 0     | 0     | 0 | 1       |
| rs10892306  | 11 | 118751326 | A | T | -2.261 | 0.02373 | -- | 0     | 0.115 | 1 | 0.7343  |
| rs497902    | 11 | 117181919 | G | C | -2.26  | 0.0238  | -? | 0     | 0     | 0 | 1       |
| rs11217420  | 11 | 119583742 | A | G | -2.257 | 0.024   | -? | 0     | 0     | 0 | 1       |
| rs79459300  | 11 | 117847373 | T | C | 2.256  | 0.02406 | +  | 0     | 0     | 0 | 1       |
| rs685184    | 11 | 117489645 | T | C | 2.256  | 0.02407 | +  | 0     | 0     | 0 | 1       |
| rs61900567  | 11 | 117927488 | C | G | 2.255  | 0.02416 | +  | 0     | 0     | 0 | 1       |
| rs521099    | 11 | 117282979 | G | C | 2.253  | 0.02428 | +  | 0     | 0     | 0 | 1       |
| rs10891976  | 11 | 116308219 | T | A | 2.249  | 0.02449 | +  | 0     | 0     | 0 | 1       |
| rs61350190  | 11 | 117402325 | T | G | -2.249 | 0.02453 | -? | 0     | 0     | 0 | 1       |
| rs11216200  | 11 | 116831843 | T | C | -2.247 | 0.02463 | -+ | -2.1  | 2.939 | 1 | 0.08648 |
| rs77520149  | 11 | 116199020 | A | C | -2.245 | 0.02478 | -? | 0     | 0     | 0 | 1       |
| rs10750166  | 11 | 119678810 | C | G | 2.243  | 0.02488 | +  | 0     | 0     | 0 | 1       |
| rs10160754  | 11 | 116858994 | C | A | -2.241 | 0.025   | -+ | -1.1  | 2.966 | 1 | 0.08501 |
| rs10160755  | 11 | 116859003 | G | A | -2.241 | 0.025   | -+ | -1.1  | 2.966 | 1 | 0.08501 |
| rs512017    | 11 | 117511787 | G | A | 2.24   | 0.02511 | +  | 0     | 0     | 0 | 1       |
| rs576510    | 11 | 116234127 | G | C | -2.239 | 0.02515 | -- | 0     | 0.022 | 1 | 0.8808  |
| rs572619    | 11 | 116233643 | T | A | -2.239 | 0.02517 | -- | 0     | 0.009 | 1 | 0.9256  |
| rs2105590   | 11 | 117925668 | A | G | 2.236  | 0.02536 | +  | 0     | 0     | 0 | 1       |
| rs680465    | 11 | 118500963 | A | G | 2.235  | 0.0254  | ++ | 0     | 0.174 | 1 | 0.677   |
| rs236918    | 11 | 117091609 | C | G | 2.234  | 0.02547 | +  | 0     | 0     | 0 | 1       |
| rs11218030  | 11 | 120719994 | G | A | -2.233 | 0.02553 | -? | 0     | 0     | 0 | 1       |
| rs61900566  | 11 | 117926770 | G | A | 2.231  | 0.02567 | +  | 0     | 0     | 0 | 1       |
| rs488435    | 11 | 116237782 | T | C | -2.231 | 0.02568 | -- | 0     | 0.487 | 1 | 0.4855  |
| rs71480304  | 11 | 116485201 | A | G | 2.23   | 0.02572 | +  | 0     | 0     | 0 | 1       |
| rs613791    | 11 | 118764051 | T | C | -2.23  | 0.02574 | -+ | -17.6 | 2.552 | 1 | 0.1102  |
| rs1242229   | 11 | 117062370 | T | C | 2.23   | 0.02577 | +  | 0     | 0     | 0 | 1       |
| rs1242230   | 11 | 117062183 | T | C | 2.23   | 0.02577 | +  | 0     | 0     | 0 | 1       |
| rs4360730   | 11 | 116488748 | C | T | 2.23   | 0.02578 | +  | 0     | 0     | 0 | 1       |
| rs4565932   | 11 | 116488753 | A | G | 2.23   | 0.02578 | +  | 0     | 0     | 0 | 1       |
| rs11216452  | 11 | 117424804 | A | G | 2.227  | 0.02597 | +  | 0     | 0     | 0 | 1       |
| rs562236    | 11 | 116226662 | C | T | -2.226 | 0.02604 | -- | 51.6  | 6.204 | 1 | 0.01275 |
| rs1939128   | 11 | 117932042 | T | C | 2.225  | 0.02609 | +  | 0     | 0     | 0 | 1       |
| rs3901366   | 11 | 120408071 | A | G | 2.225  | 0.02609 | +  | 0     | 0     | 0 | 1       |
| rs78044162  | 11 | 116837089 | T | C | -2.225 | 0.0261  | -+ | -13   | 2.655 | 1 | 0.1032  |
| rs2252385   | 11 | 120417190 | C | T | 2.223  | 0.02624 | +  | 0     | 0     | 0 | 1       |
| rs45557239  | 11 | 116664654 | T | C | 2.222  | 0.02626 | +  | 0     | 0     | 0 | 1       |
| rs2096721   | 11 | 117925751 | T | C | 2.221  | 0.02635 | +  | 0     | 0     | 0 | 1       |
| rs7130708   | 11 | 117400550 | A | G | -2.218 | 0.02653 | -? | 0     | 0     | 0 | 1       |
| rs900012    | 11 | 116966435 | G | A | 2.218  | 0.02658 | +  | 0     | 0     | 0 | 1       |
| rs7103687   | 11 | 117406992 | A | C | -2.217 | 0.0266  | -? | 0     | 0     | 0 | 1       |
| rs2445936   | 11 | 117284577 | C | T | 2.216  | 0.02669 | +  | 0     | 0     | 0 | 1       |
| rs9971422   | 11 | 116837373 | C | T | -2.214 | 0.0268  | -+ | -4.9  | 2.86  | 1 | 0.0908  |
| rs113194822 | 11 | 116552860 | A | G | 2.214  | 0.02683 | +  | 0     | 0     | 0 | 1       |
| rs4938293   | 11 | 116512466 | T | C | -2.214 | 0.02685 | -? | 0     | 0     | 0 | 1       |
| rs12271319  | 11 | 116879224 | T | C | -2.213 | 0.0269  | -+ | 5.1   | 3.161 | 1 | 0.0754  |
| rs6421568   | 11 | 118655704 | C | G | 2.212  | 0.02694 | ++ | 0     | 0.958 | 1 | 0.3276  |
| rs6421569   | 11 | 118655775 | A | C | 2.212  | 0.02694 | ++ | 0     | 0.958 | 1 | 0.3276  |
| rs73592180  | 11 | 117308183 | G | A | -2.211 | 0.02704 | -? | 0     | 0     | 0 | 1       |
| rs561195    | 11 | 121011269 | A | C | 2.21   | 0.02712 | +  | 0     | 0     | 0 | 1       |
| rs34114773  | 11 | 117268683 | C | T | -2.208 | 0.02722 | -? | 0     | 0     | 0 | 1       |
| rs2508915   | 11 | 118652781 | C | G | 2.208  | 0.02728 | ++ | 0     | 0.964 | 1 | 0.3263  |
| rs78087637  | 11 | 116731852 | G | C | -2.206 | 0.02736 | -- | 0     | 0     | 1 | 0.9979  |
| rs34217740  | 11 | 121018698 | A | G | 2.203  | 0.02757 | +  | 0     | 0     | 0 | 1       |
| rs574529    | 11 | 116233857 | C | T | -2.203 | 0.02758 | -- | 0     | 0.017 | 1 | 0.8971  |

|             |    |           |   |   |        |         |    |     |       |   |         |
|-------------|----|-----------|---|---|--------|---------|----|-----|-------|---|---------|
| rs12273536  | 11 | 116910971 | T | C | -2.202 | 0.02766 | -- | 0   | 0.139 | 1 | 0.709   |
| rs543692    | 11 | 118598138 | C | T | 2.2    | 0.02781 | ++ | 0   | 0.395 | 1 | 0.5299  |
| rs4936459   | 11 | 118899218 | T | C | -2.2   | 0.02782 | -- | 0   | 0.038 | 1 | 0.8448  |
| rs7112937   | 11 | 116880456 | C | T | -2.2   | 0.02782 | -+ | 4.3 | 3.135 | 1 | 0.07664 |
| rs516742    | 11 | 117192383 | G | A | 2.197  | 0.028   | +? | 0   | 0     | 0 | 1       |
| rs1784295   | 11 | 118660932 | A | G | 2.197  | 0.02801 | ++ | 0   | 0.814 | 1 | 0.3669  |
| rs1790188   | 11 | 118661055 | T | C | 2.197  | 0.02801 | ++ | 0   | 0.814 | 1 | 0.3669  |
| rs1786193   | 11 | 117997570 | A | T | -2.195 | 0.02817 | -? | 0   | 0     | 0 | 1       |
| rs117640781 | 11 | 116771226 | T | C | -2.194 | 0.02824 | -? | 0   | 0     | 0 | 1       |
| rs7942967   | 11 | 117486730 | T | C | -2.193 | 0.02833 | -? | 0   | 0     | 0 | 1       |
| rs55642294  | 11 | 117395497 | A | C | -2.191 | 0.02844 | -? | 0   | 0     | 0 | 1       |
| rs11217109  | 11 | 118853774 | C | T | -2.191 | 0.02848 | -- | 0   | 0.571 | 1 | 0.4498  |
| rs640012    | 11 | 117987573 | C | T | -2.19  | 0.02851 | -? | 0   | 0     | 0 | 1       |
| rs683842    | 11 | 117489941 | C | G | 2.19   | 0.02852 | +? | 0   | 0     | 0 | 1       |
| rs3194726   | 11 | 118279936 | C | T | -2.19  | 0.02855 | -? | 0   | 0     | 0 | 1       |
| rs113962716 | 11 | 118853021 | A | C | -2.189 | 0.02863 | -- | 0   | 0.579 | 1 | 0.4467  |
| rs2186762   | 11 | 117386067 | A | C | 2.188  | 0.02869 | +? | 0   | 0     | 0 | 1       |
| rs77543424  | 11 | 117268074 | G | C | 2.187  | 0.02871 | +? | 0   | 0     | 0 | 1       |
| rs2445939   | 11 | 117186073 | T | A | -2.184 | 0.02895 | -? | 0   | 0     | 0 | 1       |
| rs7126500   | 11 | 117399606 | T | G | -2.183 | 0.02902 | -? | 0   | 0     | 0 | 1       |
| rs11216370  | 11 | 117248832 | A | G | -2.182 | 0.02914 | -? | 0   | 0     | 0 | 1       |
| rs540904    | 11 | 117284770 | C | T | 2.181  | 0.02918 | +? | 0   | 0     | 0 | 1       |
| rs17598956  | 11 | 117903210 | C | T | 2.18   | 0.02929 | +? | 0   | 0     | 0 | 1       |
| rs115076910 | 11 | 121009383 | C | T | 2.178  | 0.02941 | +? | 0   | 0     | 0 | 1       |
| rs12279396  | 11 | 120441720 | G | A | -2.176 | 0.02953 | -? | 0   | 0     | 0 | 1       |
| rs2253023   | 11 | 120412169 | T | C | 2.176  | 0.02954 | +? | 0   | 0     | 0 | 1       |
| rs4936417   | 11 | 117903836 | C | T | 2.175  | 0.0296  | +? | 0   | 0     | 0 | 1       |
| rs1815786   | 11 | 116921390 | T | C | 2.175  | 0.02962 | +? | 0   | 0     | 0 | 1       |
| rs624428    | 11 | 121010662 | T | C | 2.173  | 0.02975 | +? | 0   | 0     | 0 | 1       |
| rs11216220  | 11 | 116863988 | C | T | -2.173 | 0.02977 | -+ | 2.6 | 3.081 | 1 | 0.07922 |
| rs538645    | 11 | 118711069 | C | T | 2.17   | 0.03004 | ++ | 0   | 0.479 | 1 | 0.4889  |
| rs7931665   | 11 | 116866240 | G | A | -2.168 | 0.03014 | -+ | 2.3 | 3.071 | 1 | 0.07971 |
| rs34002948  | 11 | 121009379 | A | G | 2.168  | 0.03019 | +? | 0   | 0     | 0 | 1       |
| rs12284696  | 11 | 116879519 | G | A | -2.167 | 0.0302  | -+ | 4.4 | 3.138 | 1 | 0.0765  |
| rs572862    | 11 | 117283634 | G | A | 2.167  | 0.03023 | +? | 0   | 0     | 0 | 1       |
| rs572884    | 11 | 117283626 | G | A | 2.167  | 0.03023 | +? | 0   | 0     | 0 | 1       |
| rs603678    | 11 | 117987391 | C | T | -2.166 | 0.0303  | -? | 0   | 0     | 0 | 1       |
| rs144466751 | 11 | 116299456 | C | T | -2.166 | 0.03033 | -? | 0   | 0     | 0 | 1       |
| rs548167    | 11 | 118648396 | A | G | 2.164  | 0.03047 | ++ | 0   | 0.84  | 1 | 0.3593  |
| rs189189723 | 11 | 117034899 | T | G | -2.164 | 0.0305  | -? | 0   | 0     | 0 | 1       |
| rs480801    | 11 | 117512831 | C | T | 2.164  | 0.0305  | +? | 0   | 0     | 0 | 1       |
| rs12282572  | 11 | 116480266 | C | T | 2.163  | 0.03057 | +? | 0   | 0     | 0 | 1       |
| rs10892057  | 11 | 116872034 | C | A | -2.162 | 0.03063 | -+ | 1.9 | 3.058 | 1 | 0.08033 |
| rs11216224  | 11 | 116875924 | C | T | -2.162 | 0.03063 | -+ | 1.9 | 3.058 | 1 | 0.08033 |
| rs11216225  | 11 | 116878014 | G | A | -2.162 | 0.03063 | -+ | 1.9 | 3.058 | 1 | 0.08033 |
| rs1940625   | 11 | 116876442 | G | A | -2.162 | 0.03063 | -+ | 1.9 | 3.058 | 1 | 0.08033 |
| rs7946390   | 11 | 116875152 | G | A | -2.162 | 0.03063 | -+ | 1.9 | 3.058 | 1 | 0.08033 |
| rs11218019  | 11 | 120703916 | C | A | -2.161 | 0.03066 | -? | 0   | 0     | 0 | 1       |
| rs477036    | 11 | 117183914 | C | T | 2.161  | 0.03067 | +? | 0   | 0     | 0 | 1       |
| rs73577182  | 11 | 119678767 | C | G | 2.161  | 0.03071 | +? | 0   | 0     | 0 | 1       |
| rs561227    | 11 | 121011258 | T | C | 2.16   | 0.03078 | +? | 0   | 0     | 0 | 1       |
| rs11823783  | 11 | 117412884 | C | T | -2.16  | 0.0308  | -? | 0   | 0     | 0 | 1       |
| rs6589577   | 11 | 116749977 | C | T | 2.16   | 0.0308  | +? | 0   | 0     | 0 | 1       |
| rs6589589   | 11 | 116932428 | T | C | 2.156  | 0.03108 | +? | 0   | 0     | 0 | 1       |
| rs7124741   | 11 | 116752219 | A | T | 2.155  | 0.03113 | +? | 0   | 0     | 0 | 1       |
| rs1351452   | 11 | 116943354 | A | C | 2.154  | 0.03121 | +? | 0   | 0     | 0 | 1       |

|             |    |           |   |   |        |         |    |      |       |   |         |
|-------------|----|-----------|---|---|--------|---------|----|------|-------|---|---------|
| rs80126726  | 11 | 118852647 | A | G | -2.154 | 0.03121 | -- | 0    | 0.591 | 1 | 0.4422  |
| rs12795310  | 11 | 120931054 | C | T | -2.153 | 0.0313  | -? | 0    | 0     | 0 | 1       |
| rs2508652   | 11 | 120405162 | T | C | 2.152  | 0.03143 | +? | 0    | 0     | 0 | 1       |
| rs4936580   | 11 | 121007777 | A | G | 2.152  | 0.03143 | +? | 0    | 0     | 0 | 1       |
| rs111698696 | 11 | 117412773 | T | C | -2.151 | 0.03148 | -? | 0    | 0     | 0 | 1       |
| rs17120139  | 11 | 116774201 | A | G | 2.15   | 0.03155 | +? | 0    | 0     | 0 | 1       |
| rs672058    | 11 | 116764021 | C | T | 2.148  | 0.03169 | +? | 0    | 0     | 0 | 1       |
| rs587263    | 11 | 118816156 | C | T | 2.148  | 0.03175 | +? | 0    | 0     | 0 | 1       |
| rs2510853   | 11 | 117410682 | A | G | -2.146 | 0.03184 | -? | 0    | 0     | 0 | 1       |
| rs530849    | 11 | 116530298 | C | T | -2.146 | 0.03188 | -? | 0    | 0     | 0 | 1       |
| rs10736487  | 11 | 116950232 | A | G | 2.144  | 0.03205 | +? | 0    | 0     | 0 | 1       |
| rs4938335   | 11 | 116947361 | A | C | 2.144  | 0.03205 | +? | 0    | 0     | 0 | 1       |
| rs535996    | 11 | 118637666 | T | C | 2.143  | 0.03213 | ++ | 0    | 0.869 | 1 | 0.3513  |
| rs375508071 | 11 | 120828334 | G | A | 2.142  | 0.03218 | +? | 0    | 0     | 0 | 1       |
| rs638463    | 11 | 121011485 | C | T | 2.142  | 0.03219 | +? | 0    | 0     | 0 | 1       |
| rs7125158   | 11 | 120521305 | C | A | -2.142 | 0.0322  | -? | 0    | 0     | 0 | 1       |
| rs529717    | 11 | 118640081 | A | G | 2.141  | 0.03224 | ++ | 0    | 0.864 | 1 | 0.3525  |
| rs11216444  | 11 | 117411410 | G | A | -2.141 | 0.03225 | -? | 0    | 0     | 0 | 1       |
| rs615697    | 11 | 121037554 | C | T | 2.14   | 0.03238 | +? | 0    | 0     | 0 | 1       |
| rs616184    | 11 | 121037670 | A | G | 2.14   | 0.03238 | +? | 0    | 0     | 0 | 1       |
| rs12797557  | 11 | 117254122 | A | G | -2.138 | 0.0325  | -? | 0    | 0     | 0 | 1       |
| rs473188    | 11 | 116812029 | C | G | 2.137  | 0.0326  | +? | 0    | 0     | 0 | 1       |
| rs59099254  | 11 | 117411717 | A | C | -2.137 | 0.03261 | -? | 0    | 0     | 0 | 1       |
| rs2508929   | 11 | 118641451 | G | T | 2.136  | 0.03266 | ++ | 0    | 0.87  | 1 | 0.351   |
| rs489985    | 11 | 121037530 | A | G | 2.136  | 0.03267 | +? | 0    | 0     | 0 | 1       |
| rs1729408   | 11 | 116674818 | G | A | -2.136 | 0.03269 | -? | 0    | 0     | 0 | 1       |
| rs75375536  | 11 | 116295218 | G | A | -2.136 | 0.0327  | -? | 0    | 0     | 0 | 1       |
| rs17599289  | 11 | 117922730 | T | C | 2.135  | 0.03275 | +? | 0    | 0     | 0 | 1       |
| rs73024367  | 11 | 117362165 | A | G | 2.133  | 0.03292 | +? | 0    | 0     | 0 | 1       |
| rs61900560  | 11 | 117908084 | C | G | 2.133  | 0.03294 | +? | 0    | 0     | 0 | 1       |
| rs553779    | 11 | 116530376 | G | A | -2.132 | 0.033   | -? | 0    | 0     | 0 | 1       |
| rs579890    | 11 | 116798963 | A | G | 2.131  | 0.03311 | +? | 0    | 0     | 0 | 1       |
| rs60851263  | 11 | 117410174 | T | C | -2.13  | 0.03317 | -? | 0    | 0     | 0 | 1       |
| rs7926330   | 11 | 117915445 | T | C | 2.13   | 0.03317 | +? | 0    | 0     | 0 | 1       |
| rs10892126  | 11 | 117355892 | C | G | -2.129 | 0.03325 | -? | 0    | 0     | 0 | 1       |
| rs741811    | 11 | 118898319 | A | G | -2.128 | 0.03335 | -- | 0    | 0.379 | 1 | 0.5384  |
| rs10502224  | 11 | 116870480 | G | A | -2.127 | 0.0334  | +  | -0.4 | 2.989 | 1 | 0.08382 |
| rs571139    | 11 | 116237017 | A | G | -2.126 | 0.03351 | -- | 0    | 0.011 | 1 | 0.9174  |
| rs10790172  | 11 | 116927740 | G | T | 2.126  | 0.03353 | +? | 0    | 0     | 0 | 1       |
| rs580683    | 11 | 121034491 | T | C | 2.124  | 0.03368 | +? | 0    | 0     | 0 | 1       |
| rs530845    | 11 | 116530293 | T | C | -2.123 | 0.03372 | -? | 0    | 0     | 0 | 1       |
| rs17509913  | 11 | 117434487 | A | G | -2.123 | 0.03374 | -? | 0    | 0     | 0 | 1       |
| rs117158703 | 11 | 116897073 | T | C | -2.123 | 0.03375 | -? | 0    | 0     | 0 | 1       |
| rs686133    | 11 | 117373635 | G | T | 2.123  | 0.03376 | +? | 0    | 0     | 0 | 1       |
| rs57154584  | 11 | 117302152 | C | T | -2.123 | 0.03378 | -? | 0    | 0     | 0 | 1       |
| rs568688    | 11 | 118598612 | G | T | 2.122  | 0.03381 | ++ | 0    | 0.312 | 1 | 0.5764  |
| rs1008966   | 11 | 120854046 | T | C | -2.122 | 0.03382 | -? | 0    | 0     | 0 | 1       |
| rs57208438  | 11 | 117412185 | A | G | -2.122 | 0.03383 | -? | 0    | 0     | 0 | 1       |
| rs58088485  | 11 | 117411664 | A | G | -2.121 | 0.03389 | -? | 0    | 0     | 0 | 1       |
| rs10732856  | 11 | 116907113 | T | C | 2.121  | 0.03391 | +? | 0    | 0     | 0 | 1       |
| rs623052    | 11 | 117431045 | G | A | 2.12   | 0.03399 | +? | 0    | 0     | 0 | 1       |
| rs72645460  | 11 | 116771375 | G | A | 2.12   | 0.03403 | +? | 0    | 0     | 0 | 1       |
| rs78221557  | 11 | 116515528 | A | G | -2.119 | 0.03408 | -? | 0    | 0     | 0 | 1       |
| rs490296    | 11 | 116237970 | C | T | -2.118 | 0.03418 | -- | 0    | 0.017 | 1 | 0.8973  |
| rs2000615   | 11 | 116915819 | C | T | 2.116  | 0.03431 | +? | 0    | 0     | 0 | 1       |
| rs2155583   | 11 | 116915217 | A | G | 2.116  | 0.03431 | +? | 0    | 0     | 0 | 1       |

|              |    |           |   |   |        |         |    |   |       |   |        |
|--------------|----|-----------|---|---|--------|---------|----|---|-------|---|--------|
| rs2276422    | 11 | 118263388 | G | C | -2.116 | 0.03435 | -? | 0 | 0     | 0 | 1      |
| rs7115242    | 11 | 116908283 | A | G | 2.116  | 0.03435 | +  | 0 | 0     | 0 | 1      |
| rs7122110    | 11 | 121021940 | G | A | 2.115  | 0.03445 | +  | 0 | 0     | 0 | 1      |
| rs7926760    | 11 | 117222256 | C | T | -2.115 | 0.03447 | -? | 0 | 0     | 0 | 1      |
| rs1287591    | 11 | 119904686 | T | C | 2.114  | 0.03452 | +  | 0 | 0     | 0 | 1      |
| rs4356265    | 11 | 117301818 | T | C | -2.114 | 0.03452 | -? | 0 | 0     | 0 | 1      |
| rs10892237   | 11 | 118267763 | C | T | -2.113 | 0.03457 | -? | 0 | 0     | 0 | 1      |
| rs79092677   | 11 | 118265734 | G | T | -2.113 | 0.03457 | -? | 0 | 0     | 0 | 1      |
| rs11216861   | 11 | 118241516 | A | G | -2.113 | 0.03459 | -- | 0 | 0.05  | 1 | 0.8223 |
| rs4936590    | 11 | 121039234 | C | T | 2.113  | 0.03464 | +  | 0 | 0     | 0 | 1      |
| rs73008413   | 11 | 117368182 | T | A | 2.112  | 0.03466 | +  | 0 | 0     | 0 | 1      |
| rs1241658    | 11 | 116819617 | G | A | 2.112  | 0.03467 | +  | 0 | 0     | 0 | 1      |
| rs1002037    | 11 | 116516736 | C | G | -2.112 | 0.03472 | -? | 0 | 0     | 0 | 1      |
| rs6589592    | 11 | 116957907 | C | G | 2.111  | 0.03477 | +  | 0 | 0     | 0 | 1      |
| rs7130297    | 11 | 116923870 | C | T | 2.11   | 0.03484 | +  | 0 | 0     | 0 | 1      |
| rs61904786   | 11 | 116414846 | G | C | -2.11  | 0.03487 | -? | 0 | 0     | 0 | 1      |
| rs694093     | 11 | 117377135 | T | G | 2.109  | 0.03495 | +  | 0 | 0     | 0 | 1      |
| rs373191677  | 11 | 119904782 | A | G | 2.109  | 0.03496 | +  | 0 | 0     | 0 | 1      |
| rs605379     | 11 | 121011098 | T | C | 2.109  | 0.03497 | +  | 0 | 0     | 0 | 1      |
| rs10750100   | 11 | 116917244 | T | C | 2.108  | 0.035   | +  | 0 | 0     | 0 | 1      |
| rs1815787    | 11 | 116921397 | T | C | 2.108  | 0.03501 | +  | 0 | 0     | 0 | 1      |
| rs4288786    | 11 | 117033406 | A | G | -2.108 | 0.03505 | -? | 0 | 0     | 0 | 1      |
| rs641924     | 11 | 119936017 | T | C | 2.108  | 0.03505 | +  | 0 | 0     | 0 | 1      |
| rs61897703   | 11 | 119672586 | T | G | 2.108  | 0.03506 | +  | 0 | 0     | 0 | 1      |
| rs56310543   | 11 | 117905204 | A | G | 2.108  | 0.03507 | +  | 0 | 0     | 0 | 1      |
| rs570424     | 11 | 118588998 | C | T | 2.107  | 0.03511 | +  | 0 | 0     | 0 | 1      |
| rs7131196    | 11 | 118265227 | C | T | -2.106 | 0.0352  | -? | 0 | 0     | 0 | 1      |
| rs11217762   | 11 | 120071508 | A | G | -2.106 | 0.03524 | -? | 0 | 0     | 0 | 1      |
| rs12290281   | 11 | 116493633 | T | G | 2.102  | 0.03551 | +  | 0 | 0     | 0 | 1      |
| rs75871913   | 11 | 120848685 | A | G | 2.102  | 0.03551 | +  | 0 | 0     | 0 | 1      |
| rs12577702   | 11 | 117394979 | C | T | 2.102  | 0.03552 | +  | 0 | 0     | 0 | 1      |
| rs510988     | 11 | 116813804 | C | T | 2.102  | 0.03553 | +  | 0 | 0     | 0 | 1      |
| rs76948040   | 11 | 117444090 | T | C | -2.102 | 0.03554 | -? | 0 | 0     | 0 | 1      |
| rs61900561   | 11 | 117908926 | A | G | 2.102  | 0.03558 | +  | 0 | 0     | 0 | 1      |
| rs6589690    | 11 | 118632893 | A | G | 2.102  | 0.03559 | ++ | 0 | 0.968 | 1 | 0.3252 |
| rs2000614    | 11 | 116915742 | C | T | 2.101  | 0.03564 | +  | 0 | 0     | 0 | 1      |
| rs2000616    | 11 | 116916529 | C | T | 2.101  | 0.03564 | +  | 0 | 0     | 0 | 1      |
| rs4388921    | 11 | 116976778 | C | T | -2.1   | 0.03569 | -? | 0 | 0     | 0 | 1      |
| rs493134     | 11 | 116833679 | C | T | 2.1    | 0.03572 | +  | 0 | 0     | 0 | 1      |
| rs483837     | 11 | 117266466 | C | T | 2.099  | 0.0358  | +  | 0 | 0     | 0 | 1      |
| rs11215905   | 11 | 116242693 | C | T | -2.099 | 0.03581 | -- | 0 | 0.01  | 1 | 0.9205 |
| rs491111     | 11 | 116238034 | A | G | -2.099 | 0.03584 | -- | 0 | 0.014 | 1 | 0.9059 |
| rs7120982    | 11 | 118866505 | A | G | 2.099  | 0.03586 | +  | 0 | 0     | 0 | 1      |
| rs545675     | 11 | 116236469 | T | C | -2.098 | 0.03588 | -- | 0 | 0.008 | 1 | 0.93   |
| rs4938375    | 11 | 117294973 | C | T | 2.098  | 0.03589 | +  | 0 | 0     | 0 | 1      |
| rs7950364    | 11 | 116898886 | C | G | 2.097  | 0.03602 | +  | 0 | 0     | 0 | 1      |
| rs7110565    | 11 | 121062486 | C | T | 2.096  | 0.03607 | +  | 0 | 0     | 0 | 1      |
| rs596882     | 11 | 121011416 | C | G | 2.095  | 0.03619 | +  | 0 | 0     | 0 | 1      |
| rs11216864   | 11 | 118260017 | T | C | -2.094 | 0.0363  | -? | 0 | 0     | 0 | 1      |
| rs61898858   | 11 | 119304622 | G | A | -2.093 | 0.03632 | -? | 0 | 0     | 0 | 1      |
| rs640048     | 11 | 117987605 | G | T | -2.093 | 0.03633 | -? | 0 | 0     | 0 | 1      |
| rs2004927    | 11 | 117368982 | C | T | 2.093  | 0.03638 | +  | 0 | 0     | 0 | 1      |
| rs630024     | 11 | 117534353 | A | C | 2.093  | 0.03639 | +  | 0 | 0     | 0 | 1      |
| rs1176456955 | 11 | 116516966 | A | G | 2.092  | 0.03644 | +  | 0 | 0     | 0 | 1      |
| rs7940318    | 11 | 117994614 | G | A | -2.09  | 0.03664 | -? | 0 | 0     | 0 | 1      |
| rs2510876    | 11 | 120412823 | G | A | 2.089  | 0.03668 | +  | 0 | 0     | 0 | 1      |

|             |    |           |   |   |        |         |    |        |       |   |        |
|-------------|----|-----------|---|---|--------|---------|----|--------|-------|---|--------|
| rs4936583   | 11 | 121015968 | C | T | 2.089  | 0.03672 | +  | 0      | 0     | 0 | 1      |
| rs75017819  | 11 | 118285789 | G | A | -2.089 | 0.03672 | -  | 0      | 0     | 0 | 1      |
| rs61897704  | 11 | 119675331 | T | C | 2.089  | 0.03675 | +  | 0      | 0     | 0 | 1      |
| rs61897705  | 11 | 119675529 | G | A | 2.089  | 0.03675 | +  | 0      | 0     | 0 | 1      |
| rs2266132   | 11 | 120413117 | T | G | 2.088  | 0.03678 | +  | 0      | 0     | 0 | 1      |
| rs10892676  | 11 | 121016098 | C | T | 2.088  | 0.03679 | +  | 0      | 0     | 0 | 1      |
| rs12275038  | 11 | 121016818 | A | G | 2.088  | 0.03679 | +  | 0      | 0     | 0 | 1      |
| rs4936584   | 11 | 121016145 | A | G | 2.088  | 0.03679 | +  | 0      | 0     | 0 | 1      |
| rs583983    | 11 | 117525125 | T | C | 2.088  | 0.0368  | +  | 0      | 0     | 0 | 1      |
| rs7113829   | 11 | 116890259 | T | C | -2.088 | 0.03682 | -- | -11    | 2.703 | 1 | 0.1002 |
| rs73008408  | 11 | 117367196 | C | A | 2.088  | 0.03683 | +  | 0      | 0     | 0 | 1      |
| rs80026097  | 11 | 116732231 | C | T | -2.086 | 0.03701 | -  | 0      | 0     | 0 | 1      |
| rs560365    | 11 | 121011342 | T | C | 2.083  | 0.03721 | +  | 0      | 0     | 0 | 1      |
| rs77110391  | 11 | 116414485 | A | G | -2.083 | 0.03729 | -  | 0      | 0     | 0 | 1      |
| rs17120152  | 11 | 116787192 | C | T | -2.081 | 0.03739 | -  | 0      | 0     | 0 | 1      |
| rs11217933  | 11 | 120503083 | A | G | 2.081  | 0.03745 | +  | 0      | 0     | 0 | 1      |
| rs61900563  | 11 | 117914450 | A | G | 2.08   | 0.03757 | +  | 0      | 0     | 0 | 1      |
| rs57300701  | 11 | 118845546 | G | C | 2.079  | 0.03759 | +  | 0      | 0     | 0 | 1      |
| rs1807116   | 11 | 117369226 | C | T | 2.079  | 0.03762 | +  | 0      | 0     | 0 | 1      |
| rs111530588 | 11 | 116922586 | A | G | -2.079 | 0.03763 | -  | 0      | 0     | 0 | 1      |
| rs4938419   | 11 | 117479686 | T | A | -2.078 | 0.03769 | -  | 0      | 0     | 0 | 1      |
| rs12794425  | 11 | 116478827 | A | G | 2.077  | 0.03782 | +  | 0      | 0     | 0 | 1      |
| rs613244    | 11 | 117513154 | A | G | 2.076  | 0.03786 | +  | 0      | 0     | 0 | 1      |
| rs12794476  | 11 | 116478904 | A | G | 2.074  | 0.03808 | +  | 0      | 0     | 0 | 1      |
| rs560401    | 11 | 121011325 | G | A | 2.073  | 0.03814 | +  | 0      | 0     | 0 | 1      |
| rs4936376   | 11 | 117294959 | T | C | 2.07   | 0.03849 | +  | 0      | 0     | 0 | 1      |
| rs55787848  | 11 | 116457294 | T | C | -2.069 | 0.03854 | -  | 0      | 0     | 0 | 1      |
| rs116582417 | 11 | 116943066 | A | G | -2.068 | 0.03867 | -  | 0      | 0     | 0 | 1      |
| rs4936421   | 11 | 117913074 | C | A | 2.068  | 0.03867 | +  | 0      | 0     | 0 | 1      |
| rs11823335  | 11 | 117350966 | T | C | -2.068 | 0.03868 | -  | 0      | 0     | 0 | 1      |
| rs34998970  | 11 | 116881126 | G | A | -2.067 | 0.0387  | -  | 0      | 0     | 0 | 1      |
| rs79862770  | 11 | 116880715 | T | C | -2.067 | 0.0387  | -  | 0      | 0     | 0 | 1      |
| rs2266134   | 11 | 120413132 | C | G | 2.067  | 0.03874 | +  | 0      | 0     | 0 | 1      |
| rs516712    | 11 | 117192376 | G | A | 2.066  | 0.03886 | +  | 0      | 0     | 0 | 1      |
| rs55730046  | 11 | 117913315 | T | C | 2.065  | 0.03897 | +  | 0      | 0     | 0 | 1      |
| rs574813    | 11 | 117258662 | G | C | 2.064  | 0.03901 | +  | 0      | 0     | 0 | 1      |
| rs574873    | 11 | 117258687 | T | G | 2.064  | 0.03901 | +  | 0      | 0     | 0 | 1      |
| rs11216183  | 11 | 116781545 | A | C | -2.064 | 0.03906 | -- | 0      | 0.093 | 1 | 0.7605 |
| rs528958    | 11 | 121012693 | T | G | 2.064  | 0.03906 | +  | 0      | 0     | 0 | 1      |
| rs581786    | 11 | 121012492 | C | T | 2.064  | 0.03906 | +  | 0      | 0     | 0 | 1      |
| rs665743    | 11 | 121012978 | A | G | 2.064  | 0.03906 | +  | 0      | 0     | 0 | 1      |
| rs688106    | 11 | 121012831 | A | T | 2.064  | 0.03906 | +  | 0      | 0     | 0 | 1      |
| rs117709132 | 11 | 116760485 | T | C | -2.063 | 0.03913 | -- | 0      | 0.078 | 1 | 0.78   |
| rs4623911   | 11 | 121018870 | G | A | 2.062  | 0.03917 | +  | 0      | 0     | 0 | 1      |
| rs4641485   | 11 | 121018999 | G | A | 2.062  | 0.03917 | +  | 0      | 0     | 0 | 1      |
| rs76882215  | 11 | 116897163 | C | T | -2.062 | 0.03921 | -  | 0      | 0     | 0 | 1      |
| rs7126416   | 11 | 117399649 | A | C | -2.061 | 0.03928 | -  | 0      | 0     | 0 | 1      |
| rs563537    | 11 | 118595207 | A | T | 2.061  | 0.03935 | +  | 0      | 0     | 0 | 1      |
| rs143793912 | 11 | 117213159 | T | C | -2.06  | 0.03941 | -  | 0      | 0     | 0 | 1      |
| rs7942406   | 11 | 117371563 | T | G | 2.059  | 0.03945 | +  | 0      | 0     | 0 | 1      |
| rs1783937   | 11 | 118609736 | A | G | 2.059  | 0.03946 | ++ | -129.2 | 1.309 | 1 | 0.2526 |
| rs12285468  | 11 | 121018488 | C | T | 2.059  | 0.0395  | +  | 0      | 0     | 0 | 1      |
| rs111519461 | 11 | 117004891 | A | T | -2.058 | 0.03961 | -  | 0      | 0     | 0 | 1      |
| rs2269397   | 11 | 117074299 | C | T | -2.058 | 0.03961 | -  | 0      | 0     | 0 | 1      |
| rs7948971   | 11 | 116202083 | G | A | -2.057 | 0.03973 | -  | 0      | 0     | 0 | 1      |
| rs45577233  | 11 | 117090225 | T | A | -2.056 | 0.03977 | -  | 0      | 0     | 0 | 1      |

|              |    |           |   |   |        |         |    |        |       |   |        |
|--------------|----|-----------|---|---|--------|---------|----|--------|-------|---|--------|
| rs76567973   | 11 | 116970761 | G | C | -2.056 | 0.03978 | -? | 0      | 0     | 0 | 1      |
| rs12295025   | 11 | 116454374 | G | A | -2.056 | 0.03979 | -? | 0      | 0     | 0 | 1      |
| rs475946     | 11 | 118629143 | T | C | 2.055  | 0.03986 | ++ | 0      | 0.938 | 1 | 0.3328 |
| rs11218158   | 11 | 121014228 | G | A | 2.054  | 0.04    | +  | 0      | 0     | 0 | 1      |
| rs877538     | 11 | 121014459 | A | C | 2.054  | 0.04    | +  | 0      | 0     | 0 | 1      |
| rs4586206    | 11 | 116275617 | A | G | -2.054 | 0.04001 | -? | 0      | 0     | 0 | 1      |
| rs7114879    | 11 | 121014860 | T | C | 2.054  | 0.04002 | +  | 0      | 0     | 0 | 1      |
| rs76384483   | 11 | 116806616 | C | T | -2.052 | 0.04016 | -? | 0      | 0     | 0 | 1      |
| rs4938376    | 11 | 117295431 | G | A | 2.052  | 0.04018 | +  | 0      | 0     | 0 | 1      |
| rs4936586    | 11 | 121017863 | A | C | 2.052  | 0.04019 | +  | 0      | 0     | 0 | 1      |
| rs4936587    | 11 | 121018007 | G | A | 2.052  | 0.04019 | +  | 0      | 0     | 0 | 1      |
| rs7120647    | 11 | 121017604 | C | T | 2.052  | 0.04019 | +  | 0      | 0     | 0 | 1      |
| rs607014     | 11 | 121010788 | A | G | 2.051  | 0.04027 | +  | 0      | 0     | 0 | 1      |
| rs2510446    | 11 | 117185634 | C | T | -2.051 | 0.04028 | -? | 0      | 0     | 0 | 1      |
| rs7940750    | 11 | 117653350 | T | C | 2.051  | 0.0403  | +  | 0      | 0     | 0 | 1      |
| rs12285467   | 11 | 121018485 | C | T | 2.05   | 0.04036 | +  | 0      | 0     | 0 | 1      |
| rs144750609  | 11 | 117214617 | C | T | 2.05   | 0.04036 | +  | 0      | 0     | 0 | 1      |
| rs1474828939 | 11 | 116768491 | T | C | -2.05  | 0.04039 | -? | 0      | 0     | 0 | 1      |
| rs1020392    | 11 | 116792299 | A | G | -2.049 | 0.04048 | -? | 0      | 0     | 0 | 1      |
| rs1020393    | 11 | 116792336 | T | C | -2.049 | 0.04048 | -? | 0      | 0     | 0 | 1      |
| rs7130160    | 11 | 116789438 | C | T | -2.049 | 0.04048 | -? | 0      | 0     | 0 | 1      |
| rs78234966   | 11 | 116781699 | C | T | -2.048 | 0.04052 | -? | 0      | 0     | 0 | 1      |
| rs7114915    | 11 | 121014983 | G | A | 2.048  | 0.04054 | +  | 0      | 0     | 0 | 1      |
| rs2510877    | 11 | 120412867 | G | T | 2.048  | 0.04057 | +  | 0      | 0     | 0 | 1      |
| rs7124091    | 11 | 120520418 | G | C | -2.047 | 0.04063 | -? | 0      | 0     | 0 | 1      |
| rs6589574    | 11 | 116730638 | A | G | 2.047  | 0.04066 | +  | 0      | 0     | 0 | 1      |
| rs4936585    | 11 | 121017795 | T | G | 2.047  | 0.04069 | +  | 0      | 0     | 0 | 1      |
| rs2186781    | 11 | 118605447 | T | C | 2.046  | 0.04072 | ++ | -186.5 | 1.047 | 1 | 0.3062 |
| rs494553     | 11 | 117261853 | T | C | 2.046  | 0.04072 | +  | 0      | 0     | 0 | 1      |
| rs606674     | 11 | 121010820 | G | A | 2.046  | 0.04072 | +  | 0      | 0     | 0 | 1      |
| rs620778     | 11 | 121009800 | T | C | 2.046  | 0.04077 | +  | 0      | 0     | 0 | 1      |
| rs2187125    | 11 | 116517968 | G | T | -2.046 | 0.0408  | -? | 0      | 0     | 0 | 1      |
| rs620164     | 11 | 121010116 | A | G | 2.046  | 0.0408  | +  | 0      | 0     | 0 | 1      |
| rs4938473    | 11 | 117927550 | A | G | 2.044  | 0.04096 | +  | 0      | 0     | 0 | 1      |
| rs11606425   | 11 | 117449497 | T | A | -2.044 | 0.04098 | -- | -164.8 | 1.133 | 1 | 0.2872 |
| rs3087611    | 11 | 116645336 | T | A | -2.044 | 0.04099 | -? | 0      | 0     | 0 | 1      |
| rs7120762    | 11 | 116833399 | C | A | -2.044 | 0.041   | -? | 0      | 0     | 0 | 1      |
| rs7127416    | 11 | 116852927 | T | C | -2.044 | 0.041   | -? | 0      | 0     | 0 | 1      |
| rs2513093    | 11 | 116806687 | A | G | 2.043  | 0.04104 | +  | 0      | 0     | 0 | 1      |
| rs76636922   | 11 | 116682995 | A | G | -2.043 | 0.04106 | -- | -123.8 | 1.34  | 1 | 0.247  |
| rs11216270   | 11 | 116953644 | A | C | -2.042 | 0.04114 | -? | 0      | 0     | 0 | 1      |
| rs117043085  | 11 | 117329630 | T | C | 2.042  | 0.04116 | +  | 0      | 0     | 0 | 1      |
| rs4245168    | 11 | 116882638 | C | A | 2.042  | 0.0412  | +  | 0      | 0     | 0 | 1      |
| rs3017608    | 11 | 117189216 | A | G | 2.041  | 0.04128 | +  | 0      | 0     | 0 | 1      |
| rs115903909  | 11 | 121009384 | A | G | 2.04   | 0.04136 | +  | 0      | 0     | 0 | 1      |
| rs7108594    | 11 | 121018451 | G | A | 2.04   | 0.04138 | +  | 0      | 0     | 0 | 1      |
| rs579274     | 11 | 117288442 | C | T | 2.039  | 0.04141 | +  | 0      | 0     | 0 | 1      |
| rs7126214    | 11 | 116679711 | A | G | -2.038 | 0.04157 | -- | -97.8  | 1.517 | 1 | 0.2181 |
| rs6589578    | 11 | 116780918 | T | C | -2.038 | 0.04159 | -? | 0      | 0     | 0 | 1      |
| rs7106782    | 11 | 116782582 | G | A | -2.038 | 0.04159 | -? | 0      | 0     | 0 | 1      |
| rs1321012057 | 11 | 117711092 | A | G | -2.037 | 0.04161 | -- | 0      | 0.034 | 1 | 0.8548 |
| rs506366     | 11 | 117264256 | A | G | 2.036  | 0.04172 | +  | 0      | 0     | 0 | 1      |
| rs59283948   | 11 | 116835363 | A | G | -2.036 | 0.04174 | -? | 0      | 0     | 0 | 1      |
| rs563531     | 11 | 117414030 | A | G | -2.036 | 0.04177 | -? | 0      | 0     | 0 | 1      |
| rs10750105   | 11 | 117296160 | A | T | 2.036  | 0.04178 | +  | 0      | 0     | 0 | 1      |
| rs4935762    | 11 | 121051868 | A | G | 2.035  | 0.04181 | +  | 0      | 0     | 0 | 1      |

|              |    |           |   |   |        |         |    |        |       |   |        |
|--------------|----|-----------|---|---|--------|---------|----|--------|-------|---|--------|
| rs4936591    | 11 | 121050766 | G | A | 2.035  | 0.04181 | +  | 0      | 0     | 0 | 1      |
| rs7121104    | 11 | 120520282 | T | G | -2.035 | 0.04189 | -  | 0      | 0     | 0 | 1      |
| rs559301     | 11 | 121011488 | A | G | 2.034  | 0.04199 | +  | 0      | 0     | 0 | 1      |
| rs7105356    | 11 | 121018237 | G | A | 2.033  | 0.04202 | +  | 0      | 0     | 0 | 1      |
| rs11604377   | 11 | 117449263 | C | T | -2.033 | 0.04204 | -- | -167.9 | 1.12  | 1 | 0.2899 |
| rs11216576   | 11 | 117709760 | A | G | -2.032 | 0.04211 | -- | 0      | 0.008 | 1 | 0.93   |
| rs1790187    | 11 | 118644213 | A | G | 2.032  | 0.04213 | ++ | 0      | 0.918 | 1 | 0.338  |
| rs493720     | 11 | 118604678 | T | C | 2.032  | 0.0422  | ++ | 0      | 0.924 | 1 | 0.3364 |
| rs526850     | 11 | 118605127 | G | T | 2.032  | 0.0422  | ++ | 0      | 0.924 | 1 | 0.3364 |
| rs2282565    | 11 | 121001039 | C | T | 2.03   | 0.04232 | +  | 0      | 0     | 0 | 1      |
| rs7108166    | 11 | 121001263 | G | A | 2.03   | 0.04232 | +  | 0      | 0     | 0 | 1      |
| rs11826847   | 11 | 121024461 | A | G | 2.03   | 0.04237 | +  | 0      | 0     | 0 | 1      |
| rs11216261   | 11 | 116940210 | C | T | -2.03  | 0.04239 | -  | 0      | 0     | 0 | 1      |
| rs79955870   | 11 | 116937361 | T | C | -2.03  | 0.04239 | -  | 0      | 0     | 0 | 1      |
| rs1279744828 | 11 | 117285145 | G | A | 2.03   | 0.0424  | +  | 0      | 0     | 0 | 1      |
| rs78359532   | 11 | 116653185 | C | G | -2.029 | 0.04248 | -  | 0      | 0     | 0 | 1      |
| rs56057635   | 11 | 117349401 | G | A | -2.029 | 0.0425  | -  | 0      | 0     | 0 | 1      |
| rs2282586    | 11 | 120858410 | A | G | -2.028 | 0.04252 | -  | 0      | 0     | 0 | 1      |
| rs74727906   | 11 | 120858301 | A | G | 2.028  | 0.04259 | +  | 0      | 0     | 0 | 1      |
| rs77585745   | 11 | 116872876 | C | T | -2.027 | 0.04268 | -  | 0      | 0     | 0 | 1      |
| rs7108741    | 11 | 121018507 | T | C | 2.027  | 0.0427  | +  | 0      | 0     | 0 | 1      |
| rs4420302    | 11 | 117294706 | A | G | 2.027  | 0.04271 | +  | 0      | 0     | 0 | 1      |
| rs2508653    | 11 | 120405437 | T | C | 2.026  | 0.04275 | +  | 0      | 0     | 0 | 1      |
| rs502514     | 11 | 118241995 | C | T | 2.026  | 0.04276 | +  | 0      | 0     | 0 | 1      |
| rs9919599    | 11 | 116745484 | C | G | 2.026  | 0.04278 | +  | 0      | 0     | 0 | 1      |
| rs12281358   | 11 | 116956990 | C | T | -2.025 | 0.04284 | -  | 0      | 0     | 0 | 1      |
| rs2368149    | 11 | 116955934 | A | G | -2.025 | 0.04286 | -  | 0      | 0     | 0 | 1      |
| rs541623     | 11 | 121009627 | A | G | 2.025  | 0.04288 | +  | 0      | 0     | 0 | 1      |
| rs7927736    | 11 | 120502086 | C | T | 2.025  | 0.04289 | +  | 0      | 0     | 0 | 1      |
| rs12279811   | 11 | 121059326 | T | C | 2.024  | 0.04294 | +  | 0      | 0     | 0 | 1      |
| rs620331     | 11 | 118931099 | T | C | -2.023 | 0.04304 | -  | 0      | 0     | 0 | 1      |
| rs511676     | 11 | 116824884 | T | G | 2.022  | 0.04316 | +  | 0      | 0     | 0 | 1      |
| rs4936582    | 11 | 121015763 | C | T | 2.022  | 0.04317 | +  | 0      | 0     | 0 | 1      |
| rs607999     | 11 | 121010550 | G | A | 2.021  | 0.04326 | +  | 0      | 0     | 0 | 1      |
| rs117339323  | 11 | 116548356 | C | T | 2.021  | 0.04329 | +  | 0      | 0     | 0 | 1      |
| rs2266100    | 11 | 120414586 | A | G | 2.02   | 0.04335 | +  | 0      | 0     | 0 | 1      |
| rs485570     | 11 | 117276783 | G | T | 2.02   | 0.04338 | +  | 0      | 0     | 0 | 1      |
| rs7123630    | 11 | 118995325 | T | C | 2.02   | 0.04338 | +  | 0      | 0     | 0 | 1      |
| rs79257193   | 11 | 116901175 | G | A | -2.019 | 0.04351 | -  | 0      | 0     | 0 | 1      |
| rs519000     | 11 | 116511522 | T | C | 2.017  | 0.0437  | +  | 0      | 0     | 0 | 1      |
| rs138975985  | 11 | 116890488 | T | C | -2.017 | 0.04372 | -  | 0      | 0     | 0 | 1      |
| rs7110042    | 11 | 116883716 | T | C | -2.017 | 0.04372 | -  | 0      | 0     | 0 | 1      |
| rs508487     | 11 | 117075566 | T | C | 2.016  | 0.04375 | +  | 0      | 0     | 0 | 1      |
| rs78210954   | 11 | 119008125 | C | G | 2.016  | 0.04375 | +  | 0      | 0     | 0 | 1      |
| rs4598681    | 11 | 120723872 | T | G | -2.016 | 0.04376 | -  | 0      | 0     | 0 | 1      |
| rs10082561   | 11 | 116951584 | C | A | -2.016 | 0.0438  | -  | 0      | 0     | 0 | 1      |
| rs11216265   | 11 | 116947180 | C | T | -2.016 | 0.0438  | -  | 0      | 0     | 0 | 1      |
| rs12274725   | 11 | 116946853 | T | C | -2.016 | 0.0438  | -  | 0      | 0     | 0 | 1      |
| rs12277910   | 11 | 116958533 | A | C | -2.016 | 0.0438  | -  | 0      | 0     | 0 | 1      |
| rs567988     | 11 | 117430841 | A | G | 2.016  | 0.0438  | +  | 0      | 0     | 0 | 1      |
| rs513182     | 11 | 121010427 | C | T | 2.016  | 0.04384 | +  | 0      | 0     | 0 | 1      |
| rs117978531  | 11 | 117803083 | G | T | 2.015  | 0.0439  | +  | 0      | 0     | 0 | 1      |
| rs1902624    | 11 | 117291696 | T | C | 2.015  | 0.04391 | +  | 0      | 0     | 0 | 1      |
| rs78774571   | 11 | 116280349 | T | C | -2.014 | 0.04398 | -  | 0      | 0     | 0 | 1      |
| rs112118203  | 11 | 117440076 | C | T | -2.013 | 0.0441  | -  | 0      | 0     | 0 | 1      |
| rs12271169   | 11 | 116980021 | G | C | -2.012 | 0.0442  | -  | 0      | 0     | 0 | 1      |

|             |    |           |   |   |        |         |    |        |       |   |         |
|-------------|----|-----------|---|---|--------|---------|----|--------|-------|---|---------|
| rs1943656   | 11 | 121063130 | T | C | 2.012  | 0.0442  | +  | 0      | 0     | 0 | 1       |
| rs485901    | 11 | 118622245 | G | A | 2.011  | 0.04428 | ++ | -192.9 | 1.024 | 1 | 0.3115  |
| rs6589825   | 11 | 120509726 | C | T | -2.011 | 0.04432 | -? | 0      | 0     | 0 | 1       |
| rs17120293  | 11 | 116944846 | C | T | -2.011 | 0.04434 | -? | 0      | 0     | 0 | 1       |
| rs2513095   | 11 | 116806269 | T | C | 2.011  | 0.04435 | +  | 0      | 0     | 0 | 1       |
| rs80197460  | 11 | 116988790 | G | C | -2.01  | 0.04442 | -? | 0      | 0     | 0 | 1       |
| rs78135964  | 11 | 116971677 | T | G | -2.01  | 0.04445 | -? | 0      | 0     | 0 | 1       |
| rs11216863  | 11 | 118257081 | A | G | -2.01  | 0.04447 | -? | 0      | 0     | 0 | 1       |
| rs593252    | 11 | 119880519 | A | G | 2.01   | 0.04447 | +  | 0      | 0     | 0 | 1       |
| rs3802879   | 11 | 117414714 | T | G | -2.009 | 0.04458 | -? | 0      | 0     | 0 | 1       |
| rs4436552   | 11 | 121018771 | T | A | 2.009  | 0.04459 | +  | 0      | 0     | 0 | 1       |
| rs4539330   | 11 | 121018772 | C | G | 2.009  | 0.04459 | +  | 0      | 0     | 0 | 1       |
| rs10790183  | 11 | 117293516 | A | G | 2.008  | 0.04461 | +  | 0      | 0     | 0 | 1       |
| rs521910    | 11 | 118610629 | A | G | 2.008  | 0.04463 | ++ | -116.5 | 1.386 | 1 | 0.2391  |
| rs114034580 | 11 | 116811878 | G | A | -2.008 | 0.04464 | -? | 0      | 0     | 0 | 1       |
| rs76338210  | 11 | 116415864 | T | C | -2.008 | 0.04464 | -? | 0      | 0     | 0 | 1       |
| rs565083    | 11 | 117421984 | A | G | -2.008 | 0.04466 | -? | 0      | 0     | 0 | 1       |
| rs55765491  | 11 | 120404835 | G | A | 2.006  | 0.04488 | +  | 0      | 0     | 0 | 1       |
| rs1961138   | 11 | 118619423 | C | T | 2.005  | 0.04492 | ++ | -190.9 | 1.031 | 1 | 0.3098  |
| rs4499012   | 11 | 121053084 | A | G | 2.004  | 0.0451  | +  | 0      | 0     | 0 | 1       |
| rs117117171 | 11 | 118152252 | A | T | 2.003  | 0.04521 | ++ | 52.7   | 6.345 | 1 | 0.01177 |
| rs626562    | 11 | 117995697 | A | G | -2.003 | 0.04521 | -? | 0      | 0     | 0 | 1       |
| rs150492485 | 11 | 120529603 | A | G | -2.002 | 0.04532 | -? | 0      | 0     | 0 | 1       |
| rs593245    | 11 | 117183650 | T | C | 2.001  | 0.04535 | +  | 0      | 0     | 0 | 1       |
| rs2266101   | 11 | 120414838 | T | C | 2.001  | 0.04537 | +  | 0      | 0     | 0 | 1       |
| rs77138800  | 11 | 117459687 | T | C | -2.001 | 0.04537 | -? | 0      | 0     | 0 | 1       |
| rs7925881   | 11 | 117295791 | A | G | 2.001  | 0.0454  | +  | 0      | 0     | 0 | 1       |
| rs148233183 | 11 | 116972227 | A | G | -2.001 | 0.04543 | -? | 0      | 0     | 0 | 1       |
| rs684669    | 11 | 117524455 | A | C | 2      | 0.04545 | +  | 0      | 0     | 0 | 1       |
| rs640120    | 11 | 118618837 | A | C | 2      | 0.04552 | ++ | -189   | 1.038 | 1 | 0.3083  |
| rs111549567 | 11 | 119467150 | C | T | -2     | 0.04553 | -? | 0      | 0     | 0 | 1       |
| rs6589687   | 11 | 118615660 | T | A | 1.999  | 0.04562 | ++ | -188.7 | 1.039 | 1 | 0.308   |
| rs576266    | 11 | 116488133 | C | T | 1.999  | 0.04565 | +  | 0      | 0     | 0 | 1       |
| rs2298723   | 11 | 120853380 | C | A | -1.999 | 0.04566 | -? | 0      | 0     | 0 | 1       |
| rs951839    | 11 | 116409788 | A | C | -1.998 | 0.04572 | -? | 0      | 0     | 0 | 1       |
| rs74736885  | 11 | 120998225 | G | A | 1.998  | 0.04573 | +  | 0      | 0     | 0 | 1       |
| rs12418036  | 11 | 116947306 | A | G | -1.997 | 0.0458  | -? | 0      | 0     | 0 | 1       |
| rs11215942  | 11 | 116325337 | A | G | 1.996  | 0.04588 | +  | 0      | 0     | 0 | 1       |
| rs7931770   | 11 | 116866290 | C | T | 1.996  | 0.04596 | +  | 0      | 0     | 0 | 1       |
| rs7108587   | 11 | 121018391 | T | C | 1.995  | 0.04602 | +  | 0      | 0     | 0 | 1       |
| rs10892313  | 11 | 118809329 | A | G | -1.995 | 0.04603 | -- | 0      | 0.104 | 1 | 0.7472  |
| rs143138921 | 11 | 116909657 | G | T | -1.995 | 0.04606 | -? | 0      | 0     | 0 | 1       |
| rs74603899  | 11 | 116911423 | T | G | -1.995 | 0.04606 | -? | 0      | 0     | 0 | 1       |
| rs77960525  | 11 | 116912494 | A | G | -1.995 | 0.04606 | -? | 0      | 0     | 0 | 1       |
| rs73575424  | 11 | 118788517 | A | C | 1.994  | 0.04614 | +- | 27.6   | 4.142 | 1 | 0.04183 |
| rs2510878   | 11 | 120414850 | C | A | 1.994  | 0.04615 | +  | 0      | 0     | 0 | 1       |
| rs588918    | 11 | 116856642 | T | C | 1.993  | 0.04631 | +  | 0      | 0     | 0 | 1       |
| rs149576335 | 11 | 116975136 | A | G | -1.992 | 0.04639 | -? | 0      | 0     | 0 | 1       |
| rs569845    | 11 | 117268256 | T | G | 1.992  | 0.04639 | +  | 0      | 0     | 0 | 1       |
| rs76942203  | 11 | 116973247 | A | G | -1.992 | 0.04639 | -? | 0      | 0     | 0 | 1       |
| rs2105611   | 11 | 116488610 | A | G | 1.991  | 0.04646 | +  | 0      | 0     | 0 | 1       |
| rs3017773   | 11 | 116488591 | G | T | 1.991  | 0.04646 | +  | 0      | 0     | 0 | 1       |
| rs529618    | 11 | 116488978 | A | G | 1.991  | 0.04646 | +  | 0      | 0     | 0 | 1       |
| rs4323878   | 11 | 120849062 | C | G | -1.991 | 0.04649 | -? | 0      | 0     | 0 | 1       |
| rs2010611   | 11 | 116583103 | A | G | 1.991  | 0.04651 | +  | 0      | 0     | 0 | 1       |
| rs546617    | 11 | 117275815 | A | G | 1.991  | 0.04652 | +  | 0      | 0     | 0 | 1       |

|             |    |           |   |   |        |         |    |   |       |   |        |
|-------------|----|-----------|---|---|--------|---------|----|---|-------|---|--------|
| rs78641307  | 11 | 120530241 | C | A | -1.99  | 0.0466  | -? | 0 | 0     | 0 | 1      |
| rs524392    | 11 | 121066195 | A | T | 1.99   | 0.04663 | +? | 0 | 0     | 0 | 1      |
| rs640147    | 11 | 117422642 | T | C | -1.987 | 0.04691 | -? | 0 | 0     | 0 | 1      |
| rs75428021  | 11 | 116731302 | T | C | -1.986 | 0.047   | -? | 0 | 0     | 0 | 1      |
| rs61900565  | 11 | 117926624 | G | C | 1.986  | 0.04707 | +? | 0 | 0     | 0 | 1      |
| rs113213242 | 11 | 116758216 | T | C | -1.985 | 0.0471  | -? | 0 | 0     | 0 | 1      |
| rs117457463 | 11 | 116760474 | A | G | -1.985 | 0.0471  | -? | 0 | 0     | 0 | 1      |
| rs17134988  | 11 | 116758454 | A | G | -1.985 | 0.0471  | -? | 0 | 0     | 0 | 1      |
| rs568984    | 11 | 117273094 | T | G | 1.984  | 0.04727 | +? | 0 | 0     | 0 | 1      |
| rs618354    | 11 | 116700777 | C | G | -1.982 | 0.04746 | -? | 0 | 0     | 0 | 1      |
| rs535774    | 11 | 118468037 | T | C | 1.982  | 0.04748 | ++ | 0 | 0.367 | 1 | 0.5447 |
| rs73592285  | 11 | 116821415 | C | T | -1.982 | 0.04751 | -? | 0 | 0     | 0 | 1      |
| rs7111299   | 11 | 117415385 | A | C | -1.98  | 0.04765 | -? | 0 | 0     | 0 | 1      |
| rs10892631  | 11 | 120734139 | A | G | -1.98  | 0.0477  | -? | 0 | 0     | 0 | 1      |
| rs3863308   | 11 | 117293741 | G | T | 1.979  | 0.04778 | +? | 0 | 0     | 0 | 1      |
| rs925151    | 11 | 116369171 | A | G | 1.979  | 0.04782 | +? | 0 | 0     | 0 | 1      |
| rs11215928  | 11 | 116300734 | T | C | -1.979 | 0.04787 | -? | 0 | 0     | 0 | 1      |
| rs141555847 | 11 | 116767722 | A | G | -1.978 | 0.04788 | -? | 0 | 0     | 0 | 1      |
| rs76402668  | 11 | 116771204 | C | T | -1.978 | 0.04788 | -? | 0 | 0     | 0 | 1      |
| rs146523230 | 11 | 116778138 | A | G | -1.978 | 0.04792 | -? | 0 | 0     | 0 | 1      |
| rs7114963   | 11 | 116875983 | T | C | 1.978  | 0.04793 | +? | 0 | 0     | 0 | 1      |
| rs76542665  | 11 | 116587953 | A | C | 1.977  | 0.04802 | +? | 0 | 0     | 0 | 1      |
| rs74700879  | 11 | 116783142 | G | C | -1.977 | 0.04803 | -? | 0 | 0     | 0 | 1      |
| rs9971421   | 11 | 116941540 | T | C | -1.977 | 0.04808 | -? | 0 | 0     | 0 | 1      |
| rs487261    | 11 | 117205861 | T | C | 1.975  | 0.04825 | +? | 0 | 0     | 0 | 1      |
| rs2226637   | 11 | 116269990 | C | G | -1.974 | 0.04833 | -? | 0 | 0     | 0 | 1      |
| rs4516002   | 11 | 116999059 | A | G | 1.974  | 0.04833 | +? | 0 | 0     | 0 | 1      |
| rs7121347   | 11 | 116867209 | G | T | 1.974  | 0.04837 | +? | 0 | 0     | 0 | 1      |
| rs56204159  | 11 | 117925581 | T | C | 1.974  | 0.04839 | +? | 0 | 0     | 0 | 1      |
| rs78013608  | 11 | 116752045 | A | G | -1.974 | 0.04842 | -? | 0 | 0     | 0 | 1      |
| rs115255270 | 11 | 116819050 | C | T | -1.973 | 0.04847 | -? | 0 | 0     | 0 | 1      |
| rs117791268 | 11 | 116839094 | A | G | -1.973 | 0.04847 | -? | 0 | 0     | 0 | 1      |
| rs118137922 | 11 | 116842758 | A | G | -1.973 | 0.04847 | -? | 0 | 0     | 0 | 1      |
| rs12283494  | 11 | 116815717 | A | G | -1.973 | 0.04847 | -? | 0 | 0     | 0 | 1      |
| rs2289891   | 11 | 116824938 | C | A | -1.973 | 0.04847 | -? | 0 | 0     | 0 | 1      |
| rs57040912  | 11 | 116815306 | G | A | -1.973 | 0.04847 | -? | 0 | 0     | 0 | 1      |
| rs6589581   | 11 | 116828859 | T | A | -1.973 | 0.04847 | -? | 0 | 0     | 0 | 1      |
| rs7110113   | 11 | 116856152 | C | A | -1.973 | 0.04847 | -? | 0 | 0     | 0 | 1      |
| rs7112772   | 11 | 116852714 | C | T | -1.973 | 0.04847 | -? | 0 | 0     | 0 | 1      |
| rs7112773   | 11 | 116852716 | C | T | -1.973 | 0.04847 | -? | 0 | 0     | 0 | 1      |
| rs7130221   | 11 | 116828573 | A | G | -1.973 | 0.04847 | -? | 0 | 0     | 0 | 1      |
| rs74557653  | 11 | 116806367 | T | G | -1.973 | 0.04847 | -? | 0 | 0     | 0 | 1      |
| rs76223783  | 11 | 116842174 | C | T | -1.973 | 0.04847 | -? | 0 | 0     | 0 | 1      |
| rs77029349  | 11 | 116830628 | T | G | -1.973 | 0.04847 | -? | 0 | 0     | 0 | 1      |
| rs77161357  | 11 | 116826409 | C | T | -1.973 | 0.04847 | -? | 0 | 0     | 0 | 1      |
| rs77203966  | 11 | 116801299 | T | C | -1.973 | 0.04847 | -? | 0 | 0     | 0 | 1      |
| rs78241753  | 11 | 116849544 | C | G | -1.973 | 0.04847 | -? | 0 | 0     | 0 | 1      |
| rs7937585   | 11 | 116844649 | A | G | -1.973 | 0.04847 | -? | 0 | 0     | 0 | 1      |
| rs7938466   | 11 | 116829129 | C | T | -1.973 | 0.04847 | -? | 0 | 0     | 0 | 1      |
| rs7940002   | 11 | 116850485 | A | C | -1.973 | 0.04847 | -? | 0 | 0     | 0 | 1      |
| rs7940300   | 11 | 116820673 | T | A | -1.973 | 0.04847 | -? | 0 | 0     | 0 | 1      |
| rs79868224  | 11 | 116849038 | A | G | -1.973 | 0.04847 | -? | 0 | 0     | 0 | 1      |
| rs144646355 | 11 | 117052107 | A | G | -1.972 | 0.04856 | -? | 0 | 0     | 0 | 1      |
| rs61729990  | 11 | 117052532 | A | C | -1.972 | 0.04856 | -? | 0 | 0     | 0 | 1      |
| rs1786176   | 11 | 117905635 | A | G | -1.972 | 0.04863 | -? | 0 | 0     | 0 | 1      |
| rs74496689  | 11 | 116621623 | A | G | -1.972 | 0.04865 | -? | 0 | 0     | 0 | 1      |

|             |    |           |   |   |        |         |    |        |       |   |        |
|-------------|----|-----------|---|---|--------|---------|----|--------|-------|---|--------|
| rs4938472   | 11 | 117926172 | A | T | 1.971  | 0.04867 | +  | 0      | 0     | 0 | 1      |
| rs73008657  | 11 | 119720735 | A | G | -1.971 | 0.04867 | -  | 0      | 0     | 0 | 1      |
| rs77535577  | 11 | 116685391 | A | G | -1.971 | 0.04868 | -- | -190.8 | 1.032 | 1 | 0.3098 |
| rs964256    | 11 | 121192650 | G | C | -1.971 | 0.04877 | -  | 0      | 0     | 0 | 1      |
| rs11217117  | 11 | 118865992 | T | C | -1.97  | 0.04879 | -  | 0      | 0     | 0 | 1      |
| rs4938589   | 11 | 118810405 | T | C | -1.97  | 0.04883 | -- | 0      | 0.212 | 1 | 0.6454 |
| rs479591    | 11 | 117429034 | G | A | 1.97   | 0.04884 | +  | 0      | 0     | 0 | 1      |
| rs3863310   | 11 | 117293929 | C | T | 1.97   | 0.04886 | +  | 0      | 0     | 0 | 1      |
| rs4935760   | 11 | 121007228 | T | A | 1.969  | 0.04891 | +  | 0      | 0     | 0 | 1      |
| rs542322    | 11 | 117421824 | A | G | -1.969 | 0.04898 | -  | 0      | 0     | 0 | 1      |
| rs4936393   | 11 | 117503394 | G | A | 1.968  | 0.04902 | +  | 0      | 0     | 0 | 1      |
| rs3889526   | 11 | 118856491 | A | C | -1.967 | 0.04914 | -  | 0      | 0     | 0 | 1      |
| rs4938610   | 11 | 118857466 | C | T | -1.967 | 0.04914 | -  | 0      | 0     | 0 | 1      |
| rs607273    | 11 | 116862818 | A | T | 1.967  | 0.04922 | +  | 0      | 0     | 0 | 1      |
| rs7112111   | 11 | 116980858 | G | T | -1.966 | 0.04927 | -  | 0      | 0     | 0 | 1      |
| rs75188049  | 11 | 116780567 | A | G | -1.966 | 0.04928 | -  | 0      | 0     | 0 | 1      |
| rs77693143  | 11 | 116780702 | G | A | -1.966 | 0.04928 | -  | 0      | 0     | 0 | 1      |
| rs10892281  | 11 | 118614397 | T | C | 1.965  | 0.04936 | ++ | -178.2 | 1.078 | 1 | 0.2991 |
| rs687100    | 11 | 117536090 | T | C | 1.964  | 0.04953 | +  | 0      | 0     | 0 | 1      |
| rs76959909  | 11 | 117444949 | A | C | -1.963 | 0.04964 | -  | 0      | 0     | 0 | 1      |
| rs116861530 | 11 | 116962661 | A | G | -1.962 | 0.04973 | -  | 0      | 0     | 0 | 1      |
| rs34899605  | 11 | 116483042 | A | G | 1.962  | 0.04975 | +  | 0      | 0     | 0 | 1      |
| rs692840    | 11 | 117509536 | A | G | 1.962  | 0.04978 | +  | 0      | 0     | 0 | 1      |
| rs10892068  | 11 | 116928546 | T | C | -1.96  | 0.05    | -  | 0      | 0     | 0 | 1      |
| rs7938234   | 11 | 116903095 | T | C | -1.959 | 0.05006 | -  | 0      | 0     | 0 | 1      |
| rs112974653 | 11 | 118807637 | T | G | -1.959 | 0.05016 | -- | 0      | 0.172 | 1 | 0.6779 |
| rs75807933  | 11 | 117444661 | A | T | -1.957 | 0.0503  | -  | 0      | 0     | 0 | 1      |
| rs624555    | 11 | 117202782 | T | C | 1.955  | 0.0506  | +  | 0      | 0     | 0 | 1      |
| rs80350987  | 11 | 119705743 | A | C | -1.954 | 0.05065 | -  | 0      | 0     | 0 | 1      |
| rs4936521   | 11 | 120459320 | G | A | -1.954 | 0.05068 | -  | 0      | 0     | 0 | 1      |
| rs557053    | 11 | 117408077 | T | C | -1.953 | 0.05077 | -  | 0      | 0     | 0 | 1      |
| rs79841374  | 11 | 116684560 | T | C | -1.953 | 0.05086 | -- | -192.7 | 1.025 | 1 | 0.3113 |
| rs6589846   | 11 | 120700147 | G | T | -1.952 | 0.05093 | -  | 0      | 0     | 0 | 1      |
| rs17491510  | 11 | 116409433 | T | C | -1.952 | 0.05098 | -  | 0      | 0     | 0 | 1      |
| rs7130952   | 11 | 121016838 | T | C | 1.951  | 0.05104 | +  | 0      | 0     | 0 | 1      |
| rs142395187 | 11 | 116976009 | G | A | -1.95  | 0.05119 | -  | 0      | 0     | 0 | 1      |
| rs17119920  | 11 | 116587889 | G | C | 1.95   | 0.05121 | +  | 0      | 0     | 0 | 1      |
| rs4938617   | 11 | 118867695 | T | C | -1.947 | 0.05156 | -- | 0      | 0.252 | 1 | 0.6158 |
| rs7114746   | 11 | 116928748 | G | T | -1.947 | 0.05158 | -  | 0      | 0     | 0 | 1      |
| rs7125464   | 11 | 116928199 | A | G | -1.947 | 0.05158 | -  | 0      | 0     | 0 | 1      |
| rs77256870  | 11 | 116891077 | G | C | -1.947 | 0.05158 | -  | 0      | 0     | 0 | 1      |
| rs7942637   | 11 | 116927101 | A | G | -1.947 | 0.05158 | -  | 0      | 0     | 0 | 1      |
| rs10892067  | 11 | 116927762 | C | G | -1.946 | 0.05162 | -  | 0      | 0     | 0 | 1      |
| rs11216577  | 11 | 117710150 | T | C | -1.946 | 0.05168 | -- | 0      | 0.009 | 1 | 0.9255 |
| rs3863311   | 11 | 117294035 | A | T | 1.945  | 0.05179 | +  | 0      | 0     | 0 | 1      |
| rs12363888  | 11 | 117713187 | T | C | -1.944 | 0.05196 | -- | 0      | 0.026 | 1 | 0.872  |
| rs74420345  | 11 | 116963277 | A | C | -1.943 | 0.05196 | -  | 0      | 0     | 0 | 1      |
| rs112119822 | 11 | 118798824 | G | A | -1.943 | 0.05199 | -- | -179.2 | 1.074 | 1 | 0.2999 |
| rs10736495  | 11 | 118607090 | C | G | 1.943  | 0.05204 | ++ | -139   | 1.255 | 1 | 0.2626 |
| rs2305827   | 11 | 117246876 | C | T | -1.943 | 0.05207 | -  | 0      | 0     | 0 | 1      |
| rs609353    | 11 | 117420356 | T | C | -1.942 | 0.05211 | -  | 0      | 0     | 0 | 1      |
| rs4938606   | 11 | 118852081 | G | A | -1.942 | 0.05218 | -  | 0      | 0     | 0 | 1      |
| rs75749368  | 11 | 120528115 | T | C | -1.941 | 0.0522  | -  | 0      | 0     | 0 | 1      |
| rs4427574   | 11 | 121006650 | A | G | 1.938  | 0.05258 | +  | 0      | 0     | 0 | 1      |
| rs4936579   | 11 | 121006387 | C | T | 1.938  | 0.05258 | +  | 0      | 0     | 0 | 1      |
| rs7947688   | 11 | 116207020 | G | A | -1.938 | 0.0526  | -  | 0      | 0     | 0 | 1      |

|             |    |           |   |   |        |         |    |        |       |   |         |
|-------------|----|-----------|---|---|--------|---------|----|--------|-------|---|---------|
| rs11602493  | 11 | 120456533 | A | G | -1.938 | 0.05261 | -? | 0      | 0     | 0 | 1       |
| rs11216575  | 11 | 117709688 | G | A | -1.937 | 0.05269 | -- | 0      | 0.006 | 1 | 0.9394  |
| rs4548653   | 11 | 116903316 | A | G | -1.937 | 0.05274 | -? | 0      | 0     | 0 | 1       |
| rs112143902 | 11 | 118619948 | T | C | 1.936  | 0.05281 | ++ | 0      | 0.286 | 1 | 0.5927  |
| rs73011154  | 11 | 116448277 | C | A | -1.936 | 0.05288 | -? | 0      | 0     | 0 | 1       |
| rs10892312  | 11 | 118807740 | A | G | -1.936 | 0.05292 | -- | 0      | 0.133 | 1 | 0.7154  |
| rs79157249  | 11 | 118785982 | T | A | 1.936  | 0.05293 | +- | 21.4   | 3.819 | 1 | 0.05067 |
| rs56337383  | 11 | 120967158 | A | G | -1.934 | 0.05309 | -? | 0      | 0     | 0 | 1       |
| rs17123519  | 11 | 119853138 | T | C | 1.932  | 0.0533  | +  | 0      | 0     | 0 | 1       |
| rs7926623   | 11 | 119677955 | A | G | 1.931  | 0.05348 | +  | 0      | 0     | 0 | 1       |
| rs56751865  | 11 | 116936871 | T | C | -1.93  | 0.05359 | -? | 0      | 0     | 0 | 1       |
| rs4938614   | 11 | 118863232 | A | G | -1.93  | 0.0536  | -? | 0      | 0     | 0 | 1       |
| rs11607048  | 11 | 121152465 | G | T | -1.929 | 0.0537  | -? | 0      | 0     | 0 | 1       |
| rs3758992   | 11 | 117945171 | C | G | 1.929  | 0.0537  | +  | 0      | 0     | 0 | 1       |
| rs17492275  | 11 | 116437423 | T | C | -1.927 | 0.05394 | -? | 0      | 0     | 0 | 1       |
| rs10750171  | 11 | 120176979 | G | T | 1.927  | 0.054   | +  | 0      | 0     | 0 | 1       |
| rs78399857  | 11 | 120032251 | T | C | 1.927  | 0.05402 | +  | 0      | 0     | 0 | 1       |
| rs576390    | 11 | 117424005 | A | G | -1.926 | 0.05414 | -? | 0      | 0     | 0 | 1       |
| rs10892589  | 11 | 120509335 | T | C | -1.925 | 0.05418 | -? | 0      | 0     | 0 | 1       |
| rs539573    | 11 | 117269269 | A | T | 1.924  | 0.0544  | +  | 0      | 0     | 0 | 1       |
| rs186593252 | 11 | 116913908 | C | A | -1.923 | 0.05453 | -? | 0      | 0     | 0 | 1       |
| rs60101932  | 11 | 116916723 | A | G | -1.923 | 0.05453 | -? | 0      | 0     | 0 | 1       |
| rs74429128  | 11 | 116916984 | A | G | -1.923 | 0.05453 | -? | 0      | 0     | 0 | 1       |
| rs1902626   | 11 | 117291835 | C | A | 1.922  | 0.05455 | +  | 0      | 0     | 0 | 1       |
| rs573648    | 11 | 117424306 | A | G | -1.922 | 0.05458 | -? | 0      | 0     | 0 | 1       |
| rs11218029  | 11 | 120718086 | A | T | -1.922 | 0.05464 | -? | 0      | 0     | 0 | 1       |
| rs1939934   | 11 | 121066946 | T | C | 1.921  | 0.0547  | +  | 0      | 0     | 0 | 1       |
| rs139462136 | 11 | 116900628 | T | C | -1.921 | 0.05477 | -? | 0      | 0     | 0 | 1       |
| rs4938612   | 11 | 118863037 | C | T | -1.921 | 0.05479 | -? | 0      | 0     | 0 | 1       |
| rs4936519   | 11 | 120415158 | T | G | 1.919  | 0.05493 | +  | 0      | 0     | 0 | 1       |
| rs67120644  | 11 | 116625897 | C | T | 1.919  | 0.05504 | +  | 0      | 0     | 0 | 1       |
| rs12289097  | 11 | 116426640 | G | A | -1.918 | 0.05508 | -? | 0      | 0     | 0 | 1       |
| rs675479    | 11 | 117913430 | G | A | -1.918 | 0.05508 | -? | 0      | 0     | 0 | 1       |
| rs480120    | 11 | 117255386 | T | C | 1.916  | 0.05538 | +  | 0      | 0     | 0 | 1       |
| rs545274    | 11 | 116730833 | T | C | -1.916 | 0.05542 | -? | 0      | 0     | 0 | 1       |
| rs77892802  | 11 | 116404477 | C | T | -1.915 | 0.05548 | -? | 0      | 0     | 0 | 1       |
| rs507262    | 11 | 116491621 | G | A | 1.915  | 0.05551 | +  | 0      | 0     | 0 | 1       |
| rs534633    | 11 | 116492312 | G | A | 1.915  | 0.05554 | +  | 0      | 0     | 0 | 1       |
| rs59491594  | 11 | 116757720 | C | T | -1.913 | 0.05572 | -? | 0      | 0     | 0 | 1       |
| rs74701178  | 11 | 116763124 | C | T | -1.913 | 0.05572 | -? | 0      | 0     | 0 | 1       |
| rs759988389 | 11 | 116448341 | C | T | -1.913 | 0.05572 | -? | 0      | 0     | 0 | 1       |
| rs77718307  | 11 | 116766149 | A | G | -1.913 | 0.05572 | -? | 0      | 0     | 0 | 1       |
| rs149318234 | 11 | 116718554 | G | C | -1.913 | 0.05578 | -? | 0      | 0     | 0 | 1       |
| rs1574433   | 11 | 117347947 | T | C | -1.913 | 0.05579 | -? | 0      | 0     | 0 | 1       |
| rs562179    | 11 | 116805204 | T | C | 1.912  | 0.05584 | +  | 0      | 0     | 0 | 1       |
| rs7117408   | 11 | 118808140 | T | C | -1.912 | 0.05588 | -- | 0      | 0.123 | 1 | 0.7255  |
| rs558056    | 11 | 116530797 | T | G | 1.911  | 0.056   | +  | 0      | 0     | 0 | 1       |
| rs678327    | 11 | 117521603 | A | G | 1.91   | 0.05617 | +  | 0      | 0     | 0 | 1       |
| rs10892532  | 11 | 119951570 | G | A | 1.91   | 0.05618 | +  | 0      | 0     | 0 | 1       |
| rs11216542  | 11 | 117650725 | T | C | 1.909  | 0.0562  | +  | 0      | 0     | 0 | 1       |
| rs112422338 | 11 | 116920984 | A | G | -1.909 | 0.05622 | -? | 0      | 0     | 0 | 1       |
| rs7110034   | 11 | 118858911 | A | C | -1.909 | 0.05625 | -? | 0      | 0     | 0 | 1       |
| rs7119702   | 11 | 118607694 | G | A | 1.909  | 0.05625 | ++ | -171.6 | 1.104 | 1 | 0.2933  |
| rs4290240   | 11 | 118853488 | G | A | -1.909 | 0.05632 | -? | 0      | 0     | 0 | 1       |
| rs642215    | 11 | 117988082 | T | C | -1.909 | 0.05632 | -? | 0      | 0     | 0 | 1       |
| rs7101680   | 11 | 118799206 | A | G | -1.908 | 0.05634 | -- | -179.6 | 1.073 | 1 | 0.3003  |

|              |    |           |   |   |        |         |    |       |       |   |        |
|--------------|----|-----------|---|---|--------|---------|----|-------|-------|---|--------|
| rs502816     | 11 | 116491177 | A | C | 1.907  | 0.0565  | +? | 0     | 0     | 0 | 1      |
| rs505397     | 11 | 116491428 | G | T | 1.907  | 0.0565  | +? | 0     | 0     | 0 | 1      |
| rs1452979329 | 11 | 117466540 | A | G | -1.907 | 0.05658 | -? | 0     | 0     | 0 | 1      |
| rs586763     | 11 | 118816304 | T | C | -1.906 | 0.05661 | -- | 0     | 0.348 | 1 | 0.5554 |
| rs4936534    | 11 | 120503923 | T | A | 1.904  | 0.05695 | +? | 0     | 0     | 0 | 1      |
| rs77256135   | 11 | 119813599 | A | G | -1.904 | 0.05696 | -? | 0     | 0     | 0 | 1      |
| rs112084975  | 11 | 119813015 | T | C | -1.903 | 0.057   | -? | 0     | 0     | 0 | 1      |
| rs12282154   | 11 | 118807876 | A | G | -1.903 | 0.05701 | -- | 0     | 0.12  | 1 | 0.7293 |
| rs3901285    | 11 | 120733435 | T | C | -1.903 | 0.05703 | -? | 0     | 0     | 0 | 1      |
| rs1228001593 | 11 | 116861398 | A | G | -1.902 | 0.05712 | -? | 0     | 0     | 0 | 1      |
| rs143491990  | 11 | 116859076 | T | C | -1.902 | 0.05712 | -? | 0     | 0     | 0 | 1      |
| rs59425942   | 11 | 116870159 | T | C | -1.902 | 0.05712 | -? | 0     | 0     | 0 | 1      |
| rs7122484    | 11 | 116862105 | C | G | -1.902 | 0.05712 | -? | 0     | 0     | 0 | 1      |
| rs76391131   | 11 | 116858320 | C | T | -1.902 | 0.05712 | -? | 0     | 0     | 0 | 1      |
| rs7947525    | 11 | 116862779 | T | C | -1.902 | 0.05712 | -? | 0     | 0     | 0 | 1      |
| rs11217372   | 11 | 119519217 | G | C | 1.901  | 0.05733 | +? | 0     | 0     | 0 | 1      |
| rs17311310   | 11 | 120461835 | A | G | -1.9   | 0.0574  | -? | 0     | 0     | 0 | 1      |
| rs12808437   | 11 | 116782000 | T | G | -1.899 | 0.05751 | -? | 0     | 0     | 0 | 1      |
| rs76673375   | 11 | 117794988 | C | G | 1.899  | 0.05752 | +? | 0     | 0     | 0 | 1      |
| rs12277788   | 11 | 117349482 | T | C | -1.899 | 0.05756 | -? | 0     | 0     | 0 | 1      |
| rs55741146   | 11 | 117430840 | G | C | -1.898 | 0.05772 | -? | 0     | 0     | 0 | 1      |
| rs17311317   | 11 | 120462417 | A | G | -1.898 | 0.05773 | -? | 0     | 0     | 0 | 1      |
| rs72999502   | 11 | 118556995 | C | T | -1.897 | 0.05779 | -- | 0     | 0.195 | 1 | 0.6589 |
| rs7118591    | 11 | 116908457 | A | C | -1.896 | 0.0579  | -? | 0     | 0     | 0 | 1      |
| rs112736310  | 11 | 119812958 | T | C | -1.896 | 0.05798 | -? | 0     | 0     | 0 | 1      |
| rs58354636   | 11 | 116879162 | G | A | -1.896 | 0.05799 | -? | 0     | 0     | 0 | 1      |
| rs79849088   | 11 | 116742626 | T | C | -1.896 | 0.05802 | -? | 0     | 0     | 0 | 1      |
| rs11216413   | 11 | 117344165 | A | T | -1.895 | 0.05803 | -? | 0     | 0     | 0 | 1      |
| rs2852227    | 11 | 120589179 | C | A | 1.895  | 0.05803 | +? | 0     | 0     | 0 | 1      |
| rs906541     | 11 | 116440521 | A | G | -1.894 | 0.05825 | -? | 0     | 0     | 0 | 1      |
| rs60834024   | 11 | 116985857 | A | C | -1.894 | 0.05826 | -? | 0     | 0     | 0 | 1      |
| rs78733282   | 11 | 121079940 | G | A | 1.893  | 0.05838 | +? | 0     | 0     | 0 | 1      |
| rs7928478    | 11 | 117372281 | A | G | -1.892 | 0.05843 | -? | 0     | 0     | 0 | 1      |
| rs3181       | 11 | 116907043 | A | G | -1.892 | 0.05852 | -? | 0     | 0     | 0 | 1      |
| rs4938327    | 11 | 116906728 | C | T | -1.892 | 0.05852 | -? | 0     | 0     | 0 | 1      |
| rs12280501   | 11 | 118801440 | T | C | -1.891 | 0.05857 | -- | 0     | 0.992 | 1 | 0.3193 |
| rs76666535   | 11 | 116891412 | A | G | -1.891 | 0.05857 | -? | 0     | 0     | 0 | 1      |
| rs643014     | 11 | 117988223 | G | A | -1.891 | 0.05863 | -? | 0     | 0     | 0 | 1      |
| rs7119185    | 11 | 116886096 | T | C | -1.891 | 0.05868 | -? | 0     | 0     | 0 | 1      |
| rs12269853   | 11 | 119811734 | G | C | -1.89  | 0.05875 | -? | 0     | 0     | 0 | 1      |
| rs73008653   | 11 | 119715337 | T | C | -1.89  | 0.0588  | -? | 0     | 0     | 0 | 1      |
| rs117833973  | 11 | 116730980 | T | C | -1.89  | 0.05882 | -? | 0     | 0     | 0 | 1      |
| rs117910440  | 11 | 116727547 | C | T | -1.89  | 0.05882 | -? | 0     | 0     | 0 | 1      |
| rs75385236   | 11 | 116728260 | T | C | -1.89  | 0.05882 | -? | 0     | 0     | 0 | 1      |
| rs75771311   | 11 | 116724233 | A | G | -1.89  | 0.05882 | -? | 0     | 0     | 0 | 1      |
| rs77462380   | 11 | 116723837 | T | C | -1.89  | 0.05882 | -? | 0     | 0     | 0 | 1      |
| rs78816728   | 11 | 116727871 | C | T | -1.89  | 0.05882 | -? | 0     | 0     | 0 | 1      |
| rs548638     | 11 | 116737093 | G | T | -1.889 | 0.05892 | -? | 0     | 0     | 0 | 1      |
| rs10790347   | 11 | 119679613 | T | A | 1.889  | 0.05895 | ++ | 0     | 0.414 | 1 | 0.5197 |
| rs74884652   | 11 | 118876552 | C | T | -1.888 | 0.05901 | -- | 0     | 0.331 | 1 | 0.5653 |
| rs6589677    | 11 | 118583971 | A | G | 1.888  | 0.05908 | ++ | -94.7 | 1.541 | 1 | 0.2144 |
| rs1784108    | 11 | 116505583 | T | C | 1.886  | 0.05933 | +? | 0     | 0     | 0 | 1      |
| rs621188     | 11 | 117529622 | C | T | 1.886  | 0.05936 | +? | 0     | 0     | 0 | 1      |
| rs77230637   | 11 | 117464630 | A | G | -1.885 | 0.05942 | -? | 0     | 0     | 0 | 1      |
| rs75488969   | 11 | 118712509 | T | C | 1.885  | 0.05943 | ++ | 0     | 0.167 | 1 | 0.6825 |
| rs645258     | 11 | 116801201 | A | C | 1.884  | 0.05959 | +? | 0     | 0     | 0 | 1      |

|             |    |           |   |   |        |         |    |   |       |   |        |
|-------------|----|-----------|---|---|--------|---------|----|---|-------|---|--------|
| rs4938763   | 11 | 119934934 | T | C | 1.884  | 0.0596  | +? | 0 | 0     | 0 | 1      |
| rs75212830  | 11 | 116424533 | A | G | -1.882 | 0.05986 | -? | 0 | 0     | 0 | 1      |
| rs12420361  | 11 | 116993788 | A | G | -1.881 | 0.05996 | -? | 0 | 0     | 0 | 1      |
| rs6589576   | 11 | 116735788 | C | G | 1.881  | 0.05996 | +? | 0 | 0     | 0 | 1      |
| rs149462130 | 11 | 116726181 | T | C | -1.881 | 0.06001 | -? | 0 | 0     | 0 | 1      |
| rs663166    | 11 | 117179302 | A | G | 1.879  | 0.06025 | +? | 0 | 0     | 0 | 1      |
| rs74891547  | 11 | 118811878 | C | G | -1.877 | 0.06046 | -- | 0 | 0.707 | 1 | 0.4003 |
| rs7928581   | 11 | 117271499 | C | T | 1.877  | 0.06047 | +? | 0 | 0     | 0 | 1      |
| rs2186620   | 11 | 120801185 | C | T | 1.877  | 0.06051 | +? | 0 | 0     | 0 | 1      |
| rs2509005   | 11 | 117410428 | A | G | -1.877 | 0.06054 | -? | 0 | 0     | 0 | 1      |
| rs2018774   | 11 | 119881267 | T | A | 1.876  | 0.06066 | +? | 0 | 0     | 0 | 1      |
| rs146418192 | 11 | 116761815 | C | G | -1.876 | 0.06072 | -? | 0 | 0     | 0 | 1      |
| rs10892154  | 11 | 117535724 | A | C | 1.875  | 0.06082 | +? | 0 | 0     | 0 | 1      |
| rs9943635   | 11 | 121066079 | T | C | 1.873  | 0.06104 | +? | 0 | 0     | 0 | 1      |
| rs1893176   | 11 | 119214292 | G | A | -1.873 | 0.06109 | -? | 0 | 0     | 0 | 1      |
| rs117772632 | 11 | 116813938 | A | T | -1.872 | 0.06125 | -? | 0 | 0     | 0 | 1      |
| rs147683288 | 11 | 116808658 | T | C | -1.872 | 0.06125 | -? | 0 | 0     | 0 | 1      |
| rs58123174  | 11 | 116853151 | A | C | -1.872 | 0.06125 | -? | 0 | 0     | 0 | 1      |
| rs61301656  | 11 | 116815265 | A | G | -1.872 | 0.06125 | -? | 0 | 0     | 0 | 1      |
| rs74655990  | 11 | 116843747 | C | T | -1.872 | 0.06125 | -? | 0 | 0     | 0 | 1      |
| rs74922395  | 11 | 116831357 | C | T | -1.872 | 0.06125 | -? | 0 | 0     | 0 | 1      |
| rs75176087  | 11 | 116798503 | T | C | -1.872 | 0.06125 | -? | 0 | 0     | 0 | 1      |
| rs75216082  | 11 | 116873188 | C | T | -1.872 | 0.06125 | -? | 0 | 0     | 0 | 1      |
| rs75296049  | 11 | 116838219 | C | T | -1.872 | 0.06125 | -? | 0 | 0     | 0 | 1      |
| rs76919167  | 11 | 116872657 | C | A | -1.872 | 0.06125 | -? | 0 | 0     | 0 | 1      |
| rs77322057  | 11 | 116873956 | C | T | -1.872 | 0.06125 | -? | 0 | 0     | 0 | 1      |
| rs78672214  | 11 | 116839420 | G | A | -1.872 | 0.06125 | -? | 0 | 0     | 0 | 1      |
| rs78903015  | 11 | 116876136 | T | G | -1.872 | 0.06125 | -? | 0 | 0     | 0 | 1      |
| rs79143833  | 11 | 116823800 | C | G | -1.872 | 0.06125 | -? | 0 | 0     | 0 | 1      |
| rs79523757  | 11 | 116871192 | C | T | -1.872 | 0.06125 | -? | 0 | 0     | 0 | 1      |
| rs11218160  | 11 | 121015228 | A | G | 1.871  | 0.06129 | +? | 0 | 0     | 0 | 1      |
| rs661631    | 11 | 117408179 | T | C | -1.871 | 0.06131 | -? | 0 | 0     | 0 | 1      |
| rs73008415  | 11 | 117368358 | T | C | 1.871  | 0.06132 | +? | 0 | 0     | 0 | 1      |
| rs4936528   | 11 | 120474008 | G | C | -1.871 | 0.06141 | -? | 0 | 0     | 0 | 1      |
| rs77101138  | 11 | 120528055 | G | A | -1.87  | 0.06143 | -? | 0 | 0     | 0 | 1      |
| rs495118    | 11 | 117434728 | G | A | 1.87   | 0.06147 | +? | 0 | 0     | 0 | 1      |
| rs17245685  | 11 | 120614648 | C | T | 1.869  | 0.06165 | +? | 0 | 0     | 0 | 1      |
| rs4500499   | 11 | 120445835 | A | G | -1.868 | 0.0618  | -? | 0 | 0     | 0 | 1      |
| rs11216206  | 11 | 116843425 | G | C | -1.868 | 0.06181 | -- | 0 | 0.227 | 1 | 0.6338 |
| rs147224199 | 11 | 116398570 | T | C | -1.866 | 0.06204 | -? | 0 | 0     | 0 | 1      |
| rs582285    | 11 | 117362948 | G | A | 1.865  | 0.06216 | +? | 0 | 0     | 0 | 1      |
| rs11603180  | 11 | 120457909 | A | G | -1.864 | 0.06229 | -? | 0 | 0     | 0 | 1      |
| rs1807049   | 11 | 117385531 | G | A | -1.864 | 0.06232 | -? | 0 | 0     | 0 | 1      |
| rs2509006   | 11 | 117410507 | T | C | -1.864 | 0.06234 | -? | 0 | 0     | 0 | 1      |
| rs78927965  | 11 | 119811767 | A | C | -1.863 | 0.06251 | -? | 0 | 0     | 0 | 1      |
| rs17311324  | 11 | 120462677 | T | G | -1.862 | 0.06256 | -? | 0 | 0     | 0 | 1      |
| rs75352872  | 11 | 120425668 | T | G | -1.862 | 0.06258 | -? | 0 | 0     | 0 | 1      |
| rs721783    | 11 | 116907449 | T | C | -1.862 | 0.0626  | -? | 0 | 0     | 0 | 1      |
| rs516495    | 11 | 121073219 | C | T | 1.86   | 0.06286 | +? | 0 | 0     | 0 | 1      |
| rs1241657   | 11 | 116839761 | T | C | 1.86   | 0.06291 | +? | 0 | 0     | 0 | 1      |
| rs510250    | 11 | 117430058 | G | T | 1.859  | 0.06296 | +? | 0 | 0     | 0 | 1      |
| rs530053    | 11 | 116530251 | G | A | 1.858  | 0.06314 | +? | 0 | 0     | 0 | 1      |
| rs61900590  | 11 | 117929672 | T | C | 1.858  | 0.06322 | +? | 0 | 0     | 0 | 1      |
| rs518547    | 11 | 116738046 | G | A | -1.858 | 0.06324 | -? | 0 | 0     | 0 | 1      |
| rs61900900  | 11 | 120454144 | T | C | -1.857 | 0.06325 | -? | 0 | 0     | 0 | 1      |
| rs11217091  | 11 | 118793613 | C | T | -1.856 | 0.06343 | -- | 0 | 0.482 | 1 | 0.4874 |

|              |    |           |   |   |        |         |    |      |       |   |         |
|--------------|----|-----------|---|---|--------|---------|----|------|-------|---|---------|
| rs74955808   | 11 | 116992685 | A | G | -1.855 | 0.06355 | -? | 0    | 0     | 0 | 1       |
| rs573905     | 11 | 118572267 | A | G | 1.855  | 0.06356 | ++ | 0    | 0.043 | 1 | 0.8355  |
| rs11218127   | 11 | 120925525 | G | A | -1.855 | 0.06358 | -? | 0    | 0     | 0 | 1       |
| rs201644901  | 11 | 121071633 | C | A | 1.855  | 0.06365 | +? | 0    | 0     | 0 | 1       |
| rs1573789    | 11 | 120463065 | T | C | -1.854 | 0.06372 | -? | 0    | 0     | 0 | 1       |
| rs12416941   | 11 | 116979363 | A | G | -1.854 | 0.06378 | -? | 0    | 0     | 0 | 1       |
| rs12419459   | 11 | 116996711 | T | C | -1.853 | 0.06393 | -? | 0    | 0     | 0 | 1       |
| rs10750108   | 11 | 117492181 | A | G | 1.851  | 0.06412 | +? | 0    | 0     | 0 | 1       |
| rs671553     | 11 | 117528376 | T | C | 1.851  | 0.06418 | +? | 0    | 0     | 0 | 1       |
| rs7945067    | 11 | 119678445 | T | C | 1.85   | 0.06427 | +? | 0    | 0     | 0 | 1       |
| rs10892137   | 11 | 117430479 | T | C | 1.849  | 0.06444 | +? | 0    | 0     | 0 | 1       |
| rs4512872    | 11 | 120733629 | C | A | -1.848 | 0.06463 | -? | 0    | 0     | 0 | 1       |
| rs10790169   | 11 | 116877159 | A | C | 1.847  | 0.06471 | +? | 0    | 0     | 0 | 1       |
| rs537592     | 11 | 117517424 | C | T | 1.847  | 0.06474 | +? | 0    | 0     | 0 | 1       |
| rs151215655  | 11 | 116534026 | T | C | -1.847 | 0.06476 | -? | 0    | 0     | 0 | 1       |
| rs614634     | 11 | 121076938 | T | C | 1.847  | 0.0648  | +? | 0    | 0     | 0 | 1       |
| rs74882651   | 11 | 116985191 | A | G | -1.846 | 0.06489 | -? | 0    | 0     | 0 | 1       |
| rs1784045    | 11 | 117191734 | C | T | -1.846 | 0.0649  | -? | 0    | 0     | 0 | 1       |
| rs4938294    | 11 | 116515420 | T | C | -1.843 | 0.0654  | -? | 0    | 0     | 0 | 1       |
| rs61134913   | 11 | 116298294 | G | A | -1.842 | 0.06542 | -? | 0    | 0     | 0 | 1       |
| rs12285074   | 11 | 116762028 | A | G | 1.842  | 0.06545 | +? | 0    | 0     | 0 | 1       |
| rs45478298   | 11 | 118503912 | T | C | 1.841  | 0.06563 | +- | 21.8 | 3.834 | 1 | 0.05022 |
| rs619998     | 11 | 121090162 | C | T | 1.84   | 0.06571 | +? | 0    | 0     | 0 | 1       |
| rs75967483   | 11 | 119556519 | T | C | -1.84  | 0.06572 | -? | 0    | 0     | 0 | 1       |
| rs73008405   | 11 | 117366280 | C | G | 1.84   | 0.06573 | +? | 0    | 0     | 0 | 1       |
| rs4935758    | 11 | 120862089 | T | C | -1.84  | 0.06576 | -? | 0    | 0     | 0 | 1       |
| rs4938616    | 11 | 118865465 | T | C | -1.84  | 0.06577 | -? | 0    | 0     | 0 | 1       |
| rs1944512    | 11 | 119879786 | T | G | -1.84  | 0.0658  | -? | 0    | 0     | 0 | 1       |
| rs656189     | 11 | 121073887 | A | T | 1.84   | 0.06584 | +? | 0    | 0     | 0 | 1       |
| rs55928509   | 11 | 116547924 | A | C | 1.838  | 0.06605 | +? | 0    | 0     | 0 | 1       |
| rs111677878  | 11 | 116982434 | T | C | -1.838 | 0.06607 | -? | 0    | 0     | 0 | 1       |
| rs11217941   | 11 | 120531656 | G | T | -1.838 | 0.0661  | -? | 0    | 0     | 0 | 1       |
| rs79733808   | 11 | 116237696 | A | G | -1.838 | 0.0661  | -? | 0    | 0     | 0 | 1       |
| rs4936555    | 11 | 120699899 | T | C | -1.837 | 0.06617 | -? | 0    | 0     | 0 | 1       |
| rs112791662  | 11 | 119576357 | A | G | 1.837  | 0.0662  | +? | 0    | 0     | 0 | 1       |
| rs10790214   | 11 | 117707191 | T | C | 1.836  | 0.06631 | +? | 0    | 0     | 0 | 1       |
| rs75012772   | 11 | 119807902 | A | G | -1.836 | 0.06632 | -? | 0    | 0     | 0 | 1       |
| rs1075784    | 11 | 117369450 | G | C | 1.836  | 0.06641 | +? | 0    | 0     | 0 | 1       |
| rs1940626    | 11 | 116828121 | C | T | -1.835 | 0.06644 | -? | 0    | 0     | 0 | 1       |
| rs114797458  | 11 | 117561256 | A | G | 1.835  | 0.06656 | +? | 0    | 0     | 0 | 1       |
| rs1443827410 | 11 | 117616982 | G | A | -1.832 | 0.0669  | -? | 0    | 0     | 0 | 1       |
| rs10892721   | 11 | 121189231 | T | G | -1.832 | 0.06692 | -? | 0    | 0     | 0 | 1       |
| rs1261791    | 11 | 117200638 | A | T | 1.832  | 0.06696 | +? | 0    | 0     | 0 | 1       |
| rs2508656    | 11 | 120424740 | A | G | 1.832  | 0.067   | +? | 0    | 0     | 0 | 1       |
| rs111902338  | 11 | 119814337 | A | C | -1.832 | 0.06702 | -? | 0    | 0     | 0 | 1       |
| rs75224487   | 11 | 119813733 | T | C | -1.832 | 0.06702 | -? | 0    | 0     | 0 | 1       |
| rs76661054   | 11 | 119813686 | C | T | -1.832 | 0.06702 | -? | 0    | 0     | 0 | 1       |
| rs75154936   | 11 | 118877891 | C | T | -1.831 | 0.06705 | -- | 0    | 0.261 | 1 | 0.6095  |
| rs116850963  | 11 | 120239808 | G | A | 1.83   | 0.06718 | +? | 0    | 0     | 0 | 1       |
| rs61900473   | 11 | 120011880 | A | G | 1.83   | 0.06721 | +? | 0    | 0     | 0 | 1       |
| rs75501351   | 11 | 116731744 | G | T | -1.83  | 0.06725 | -? | 0    | 0     | 0 | 1       |
| rs6589587    | 11 | 116875338 | G | T | -1.829 | 0.06733 | -? | 0    | 0     | 0 | 1       |
| rs563990     | 11 | 116285538 | G | A | 1.829  | 0.06736 | +? | 0    | 0     | 0 | 1       |
| rs114221654  | 11 | 116980679 | T | C | -1.828 | 0.0675  | -? | 0    | 0     | 0 | 1       |
| rs116770907  | 11 | 116981515 | T | C | -1.828 | 0.0675  | -? | 0    | 0     | 0 | 1       |
| rs1944495    | 11 | 119879579 | T | C | -1.828 | 0.06758 | -? | 0    | 0     | 0 | 1       |

|             |    |           |   |   |        |         |    |      |       |   |         |
|-------------|----|-----------|---|---|--------|---------|----|------|-------|---|---------|
| rs11604129  | 11 | 120607334 | G | A | 1.828  | 0.0676  | +  | 0    | 0     | 0 | 1       |
| rs672251    | 11 | 117505239 | G | T | 1.827  | 0.06767 | +  | 0    | 0     | 0 | 1       |
| rs77763933  | 11 | 119808101 | C | G | -1.827 | 0.06769 | -  | 0    | 0     | 0 | 1       |
| rs79710878  | 11 | 119807543 | G | A | -1.827 | 0.06769 | -  | 0    | 0     | 0 | 1       |
| rs4344499   | 11 | 120734419 | G | T | -1.826 | 0.06782 | -  | 0    | 0     | 0 | 1       |
| rs533735    | 11 | 116241842 | C | A | -1.825 | 0.06793 | -- | 0    | 0.158 | 1 | 0.6906  |
| rs10892173  | 11 | 117672561 | T | C | 1.825  | 0.06797 | +  | 0    | 0     | 0 | 1       |
| rs2509007   | 11 | 117410700 | A | G | -1.825 | 0.06804 | -  | 0    | 0     | 0 | 1       |
| rs4620758   | 11 | 116945718 | A | G | -1.825 | 0.06807 | -  | 0    | 0     | 0 | 1       |
| rs7101763   | 11 | 116941985 | T | G | -1.825 | 0.06807 | -  | 0    | 0     | 0 | 1       |
| rs7119911   | 11 | 117653955 | T | G | 1.824  | 0.06809 | +  | 0    | 0     | 0 | 1       |
| rs7130213   | 11 | 116946652 | A | C | -1.824 | 0.0681  | -  | 0    | 0     | 0 | 1       |
| rs12416691  | 11 | 116996783 | T | A | -1.824 | 0.06814 | -  | 0    | 0     | 0 | 1       |
| rs12419454  | 11 | 116996631 | T | C | -1.824 | 0.06814 | -  | 0    | 0     | 0 | 1       |
| rs11216164  | 11 | 116734545 | A | G | 1.823  | 0.06833 | +  | 0    | 0     | 0 | 1       |
| rs17120344  | 11 | 116996345 | A | G | -1.822 | 0.06842 | -  | 0    | 0     | 0 | 1       |
| rs11217373  | 11 | 119519916 | G | C | 1.821  | 0.06855 | +  | 0    | 0     | 0 | 1       |
| rs2006623   | 11 | 119808535 | A | G | -1.821 | 0.06855 | -  | 0    | 0     | 0 | 1       |
| rs4938818   | 11 | 120452999 | A | G | -1.821 | 0.06855 | -  | 0    | 0     | 0 | 1       |
| rs79345551  | 11 | 119936873 | A | G | 1.821  | 0.06858 | +  | 0    | 0     | 0 | 1       |
| rs150818481 | 11 | 116749190 | A | G | -1.82  | 0.0687  | -  | 0    | 0     | 0 | 1       |
| rs12805779  | 11 | 116523063 | T | G | -1.82  | 0.06872 | -  | 0    | 0     | 0 | 1       |
| rs2004926   | 11 | 117368846 | G | A | 1.82   | 0.06874 | +  | 0    | 0     | 0 | 1       |
| rs77443589  | 11 | 119806581 | A | G | -1.82  | 0.06881 | -  | 0    | 0     | 0 | 1       |
| rs79137748  | 11 | 119806699 | C | T | -1.82  | 0.06881 | -  | 0    | 0     | 0 | 1       |
| rs7926586   | 11 | 119675931 | G | T | 1.82   | 0.06881 | +  | 0    | 0     | 0 | 1       |
| rs684973    | 11 | 117451536 | C | G | 1.819  | 0.06888 | +  | 0    | 0     | 0 | 1       |
| rs524914    | 11 | 117207122 | C | G | 1.819  | 0.06892 | +  | 0    | 0     | 0 | 1       |
| rs7929976   | 11 | 117349817 | G | A | -1.818 | 0.06901 | -  | 0    | 0     | 0 | 1       |
| rs7928007   | 11 | 117720781 | C | A | -1.817 | 0.06921 | -- | 0    | 0.059 | 1 | 0.808   |
| rs112704540 | 11 | 116818527 | G | A | -1.816 | 0.06937 | -  | 0    | 0     | 0 | 1       |
| rs2512139   | 11 | 117815564 | A | G | 1.816  | 0.06944 | +  | 0    | 0     | 0 | 1       |
| rs4938285   | 11 | 116440011 | C | T | -1.816 | 0.06944 | -  | 0    | 0     | 0 | 1       |
| rs563229    | 11 | 116288186 | G | C | 1.815  | 0.06948 | +  | 0    | 0     | 0 | 1       |
| rs1871756   | 11 | 116953645 | A | G | -1.815 | 0.06954 | -  | 0    | 0     | 0 | 1       |
| rs73008411  | 11 | 117367574 | G | A | 1.813  | 0.06976 | +  | 0    | 0     | 0 | 1       |
| rs895648    | 11 | 119677072 | C | T | 1.813  | 0.06984 | ++ | 0    | 0.254 | 1 | 0.6139  |
| rs536484    | 11 | 116280965 | C | G | 1.812  | 0.06996 | +  | 0    | 0     | 0 | 1       |
| rs6589824   | 11 | 120509621 | G | A | -1.811 | 0.07008 | -  | 0    | 0     | 0 | 1       |
| rs4938284   | 11 | 116439949 | C | T | -1.811 | 0.07013 | -  | 0    | 0     | 0 | 1       |
| rs7107702   | 11 | 116804144 | C | T | -1.811 | 0.07017 | -  | 0    | 0     | 0 | 1       |
| rs112965917 | 11 | 118725189 | A | T | 1.81   | 0.07023 | ++ | 0    | 0.024 | 1 | 0.8765  |
| rs482795    | 11 | 116227687 | G | A | -1.81  | 0.07028 | -- | 49.4 | 5.93  | 1 | 0.01489 |
| rs3819132   | 11 | 117671489 | A | G | -1.81  | 0.07029 | -  | 0    | 0     | 0 | 1       |
| rs11217090  | 11 | 118789952 | T | C | -1.81  | 0.07034 | -- | 0    | 0.295 | 1 | 0.5869  |
| rs4272793   | 11 | 119668263 | C | A | 1.806  | 0.07095 | ++ | 0    | 0.191 | 1 | 0.6624  |
| rs521187    | 11 | 117416908 | A | G | -1.805 | 0.0711  | -  | 0    | 0     | 0 | 1       |
| rs67613157  | 11 | 116514997 | T | C | -1.804 | 0.07119 | -  | 0    | 0     | 0 | 1       |
| rs1955021   | 11 | 119808052 | A | G | -1.803 | 0.07131 | -  | 0    | 0     | 0 | 1       |
| rs10790192  | 11 | 117420163 | A | G | 1.803  | 0.07134 | +  | 0    | 0     | 0 | 1       |
| rs117399581 | 11 | 117605620 | A | G | -1.802 | 0.07156 | -  | 0    | 0     | 0 | 1       |
| rs4938321   | 11 | 116852507 | T | C | -1.801 | 0.07169 | -  | 0    | 0     | 0 | 1       |
| rs76031864  | 11 | 119984598 | A | G | -1.8   | 0.0718  | -  | 0    | 0     | 0 | 1       |
| rs60171666  | 11 | 116371442 | A | G | 1.798  | 0.07213 | +  | 0    | 0     | 0 | 1       |
| rs10892054  | 11 | 116868221 | T | C | -1.797 | 0.07227 | -  | 0    | 0     | 0 | 1       |
| rs10892055  | 11 | 116868371 | A | G | -1.797 | 0.07227 | -  | 0    | 0     | 0 | 1       |

|             |    |           |   |   |        |         |    |        |       |   |         |
|-------------|----|-----------|---|---|--------|---------|----|--------|-------|---|---------|
| rs7939934   | 11 | 116861268 | T | A | -1.797 | 0.07227 | -? | 0      | 0     | 0 | 1       |
| rs1815788   | 11 | 116834971 | C | T | -1.797 | 0.07239 | -? | 0      | 0     | 0 | 1       |
| rs564892    | 11 | 118602392 | A | T | 1.796  | 0.07242 | ++ | 0      | 0.708 | 1 | 0.4002  |
| rs495171    | 11 | 117338330 | C | T | -1.796 | 0.07246 | -? | 0      | 0     | 0 | 1       |
| rs509058    | 11 | 121077211 | T | C | 1.796  | 0.07248 | +? | 0      | 0     | 0 | 1       |
| rs643758    | 11 | 117531887 | T | A | 1.795  | 0.07271 | +? | 0      | 0     | 0 | 1       |
| rs4936391   | 11 | 117498605 | G | A | 1.793  | 0.07294 | +? | 0      | 0     | 0 | 1       |
| rs2510872   | 11 | 116224496 | A | G | -1.793 | 0.073   | -- | 51.1   | 6.136 | 1 | 0.01324 |
| rs143367870 | 11 | 116866944 | C | A | -1.792 | 0.0732  | -? | 0      | 0     | 0 | 1       |
| rs75292554  | 11 | 116860781 | C | T | -1.792 | 0.0732  | -? | 0      | 0     | 0 | 1       |
| rs576670    | 11 | 116285930 | G | A | -1.791 | 0.07337 | -? | 0      | 0     | 0 | 1       |
| rs557990    | 11 | 118601363 | T | C | 1.79   | 0.07345 | ++ | 0      | 0.689 | 1 | 0.4065  |
| rs12288505  | 11 | 121069225 | T | C | 1.79   | 0.07347 | +? | 0      | 0     | 0 | 1       |
| rs513548    | 11 | 120847817 | C | T | 1.79   | 0.07353 | +? | 0      | 0     | 0 | 1       |
| rs75829086  | 11 | 119820707 | G | C | 1.79   | 0.07353 | +? | 0      | 0     | 0 | 1       |
| rs553188    | 11 | 118576762 | T | C | 1.789  | 0.0736  | ++ | -141.2 | 1.244 | 1 | 0.2648  |
| rs12417881  | 11 | 117531358 | G | A | 1.789  | 0.07364 | +? | 0      | 0     | 0 | 1       |
| rs76665318  | 11 | 116864639 | C | T | -1.789 | 0.07368 | -? | 0      | 0     | 0 | 1       |
| rs497898    | 11 | 116227259 | A | G | -1.788 | 0.07378 | -- | 49.1   | 5.888 | 1 | 0.01524 |
| rs11216288  | 11 | 117004656 | T | C | 1.788  | 0.07379 | +? | 0      | 0     | 0 | 1       |
| rs74778631  | 11 | 117558945 | A | G | 1.788  | 0.07379 | +? | 0      | 0     | 0 | 1       |
| rs11218017  | 11 | 120697099 | G | A | 1.787  | 0.07389 | +? | 0      | 0     | 0 | 1       |
| rs61901099  | 11 | 119556950 | T | C | -1.787 | 0.07397 | -? | 0      | 0     | 0 | 1       |
| rs693701    | 11 | 119804461 | T | C | 1.786  | 0.07416 | +? | 0      | 0     | 0 | 1       |
| rs111345266 | 11 | 118893767 | T | C | -1.783 | 0.07456 | -- | 0      | 0.287 | 1 | 0.592   |
| rs11216545  | 11 | 117659322 | A | G | -1.783 | 0.07457 | -? | 0      | 0     | 0 | 1       |
| rs10790328  | 11 | 119506255 | G | C | -1.783 | 0.07462 | -? | 0      | 0     | 0 | 1       |
| rs11217554  | 11 | 119756941 | C | G | 1.783  | 0.07465 | +? | 0      | 0     | 0 | 1       |
| rs4938315   | 11 | 116731205 | G | A | 1.782  | 0.07478 | +? | 0      | 0     | 0 | 1       |
| rs5103      | 11 | 116692552 | G | A | -1.782 | 0.0748  | -? | 0      | 0     | 0 | 1       |
| rs638496    | 11 | 121011507 | T | C | 1.78   | 0.07506 | +? | 0      | 0     | 0 | 1       |
| rs10790356  | 11 | 119807402 | T | A | -1.78  | 0.07509 | -? | 0      | 0     | 0 | 1       |
| rs17119814  | 11 | 116424420 | G | C | -1.78  | 0.0751  | -? | 0      | 0     | 0 | 1       |
| rs45619137  | 11 | 117162284 | A | G | -1.778 | 0.07537 | -? | 0      | 0     | 0 | 1       |
| rs77018736  | 11 | 117795671 | A | G | 1.778  | 0.0754  | +? | 0      | 0     | 0 | 1       |
| rs35659242  | 11 | 120275234 | G | T | 1.778  | 0.07548 | +? | 0      | 0     | 0 | 1       |
| rs634044    | 11 | 116752558 | C | T | -1.777 | 0.07557 | -? | 0      | 0     | 0 | 1       |
| rs73008650  | 11 | 119713633 | A | G | -1.777 | 0.07558 | -? | 0      | 0     | 0 | 1       |
| rs77916839  | 11 | 118798780 | C | G | -1.777 | 0.0756  | -- | 0      | 0.792 | 1 | 0.3734  |
| rs675246    | 11 | 119880819 | T | C | 1.776  | 0.07576 | +? | 0      | 0     | 0 | 1       |
| rs4936426   | 11 | 118134597 | C | T | -1.776 | 0.07579 | -? | 0      | 0     | 0 | 1       |
| rs4938724   | 11 | 119672156 | A | G | 1.772  | 0.07643 | ++ | 0      | 0.259 | 1 | 0.6106  |
| rs663003    | 11 | 118823148 | C | T | 1.772  | 0.07643 | ++ | 0      | 0.007 | 1 | 0.9338  |
| rs498912    | 11 | 118576997 | C | T | 1.771  | 0.07649 | ++ | -143.5 | 1.232 | 1 | 0.267   |
| rs7933007   | 11 | 118730669 | C | T | 1.771  | 0.07664 | ++ | 0      | 0.399 | 1 | 0.5275  |
| rs78813250  | 11 | 120557393 | T | G | -1.77  | 0.0767  | -? | 0      | 0     | 0 | 1       |
| rs536761    | 11 | 117517366 | T | C | 1.77   | 0.07675 | +? | 0      | 0     | 0 | 1       |
| rs880004    | 11 | 119808956 | G | A | -1.77  | 0.07676 | -? | 0      | 0     | 0 | 1       |
| rs80310120  | 11 | 116357627 | T | C | 1.77   | 0.07679 | +? | 0      | 0     | 0 | 1       |
| rs1815789   | 11 | 116834953 | C | T | -1.769 | 0.07684 | -? | 0      | 0     | 0 | 1       |
| rs7941927   | 11 | 116838904 | G | A | -1.769 | 0.07684 | -? | 0      | 0     | 0 | 1       |
| rs895650    | 11 | 119806917 | T | C | -1.769 | 0.07685 | -? | 0      | 0     | 0 | 1       |
| rs7128664   | 11 | 121186914 | G | C | -1.769 | 0.07686 | -? | 0      | 0     | 0 | 1       |
| rs73578509  | 11 | 116481694 | G | C | -1.768 | 0.07712 | -? | 0      | 0     | 0 | 1       |
| rs141250514 | 11 | 116999025 | C | T | -1.767 | 0.07721 | -? | 0      | 0     | 0 | 1       |
| rs145802214 | 11 | 116998912 | C | A | -1.767 | 0.07721 | -? | 0      | 0     | 0 | 1       |

|             |    |           |   |   |        |         |    |        |       |   |         |
|-------------|----|-----------|---|---|--------|---------|----|--------|-------|---|---------|
| rs4430518   | 11 | 120723433 | G | T | -1.767 | 0.07725 | -? | 0      | 0     | 0 | 1       |
| rs61900791  | 11 | 120237971 | T | C | -1.767 | 0.07731 | -? | 0      | 0     | 0 | 1       |
| rs4245037   | 11 | 120470291 | A | T | -1.766 | 0.07742 | -? | 0      | 0     | 0 | 1       |
| rs2852225   | 11 | 120588562 | T | G | 1.766  | 0.07744 | +? | 0      | 0     | 0 | 1       |
| rs1035237   | 11 | 116727850 | G | C | 1.766  | 0.07745 | +? | 0      | 0     | 0 | 1       |
| rs656083    | 11 | 117181992 | C | T | -1.766 | 0.07747 | -? | 0      | 0     | 0 | 1       |
| rs626571    | 11 | 117518038 | C | T | 1.765  | 0.07754 | +? | 0      | 0     | 0 | 1       |
| rs12575259  | 11 | 120428959 | A | G | 1.765  | 0.07756 | +? | 0      | 0     | 0 | 1       |
| rs78381558  | 11 | 116424451 | C | G | -1.765 | 0.07758 | -? | 0      | 0     | 0 | 1       |
| rs11605265  | 11 | 118805144 | A | G | -1.765 | 0.07759 | -- | -165.3 | 1.131 | 1 | 0.2876  |
| rs150308863 | 11 | 117165046 | T | C | 1.765  | 0.07759 | +? | 0      | 0     | 0 | 1       |
| rs1944502   | 11 | 119813545 | G | A | -1.764 | 0.07774 | -? | 0      | 0     | 0 | 1       |
| rs3740725   | 11 | 119859583 | A | G | 1.764  | 0.0778  | +? | 0      | 0     | 0 | 1       |
| rs11605658  | 11 | 118805220 | T | C | -1.761 | 0.0783  | -- | -179.4 | 1.074 | 1 | 0.3001  |
| rs11217617  | 11 | 119863505 | T | C | 1.761  | 0.07831 | +? | 0      | 0     | 0 | 1       |
| rs566155    | 11 | 117198638 | C | T | 1.76   | 0.07834 | +? | 0      | 0     | 0 | 1       |
| rs680908    | 11 | 117197621 | G | C | 1.76   | 0.07835 | +? | 0      | 0     | 0 | 1       |
| rs45457998  | 11 | 118492713 | G | A | 1.76   | 0.07836 | ++ | 0      | 0.109 | 1 | 0.7411  |
| rs73023056  | 11 | 116752191 | A | G | -1.76  | 0.07844 | -? | 0      | 0     | 0 | 1       |
| rs2075292   | 11 | 116732512 | G | T | 1.759  | 0.07851 | +? | 0      | 0     | 0 | 1       |
| rs10790196  | 11 | 117496475 | T | C | 1.759  | 0.07854 | +? | 0      | 0     | 0 | 1       |
| rs3863307   | 11 | 116957263 | G | C | -1.759 | 0.07855 | -? | 0      | 0     | 0 | 1       |
| rs592009    | 11 | 117987128 | G | T | -1.758 | 0.07871 | -? | 0      | 0     | 0 | 1       |
| rs74678032  | 11 | 118812559 | C | T | 1.758  | 0.07872 | ++ | 0      | 0.465 | 1 | 0.4953  |
| rs114945429 | 11 | 117004201 | T | G | -1.758 | 0.07877 | -? | 0      | 0     | 0 | 1       |
| rs12417098  | 11 | 117004853 | A | G | -1.758 | 0.07877 | -? | 0      | 0     | 0 | 1       |
| rs12421425  | 11 | 117001960 | T | C | -1.758 | 0.07877 | -? | 0      | 0     | 0 | 1       |
| rs138039720 | 11 | 116999600 | T | C | -1.758 | 0.07877 | -? | 0      | 0     | 0 | 1       |
| rs146067038 | 11 | 117000179 | G | A | -1.758 | 0.07877 | -? | 0      | 0     | 0 | 1       |
| rs17120367  | 11 | 117002828 | T | C | -1.758 | 0.07877 | -? | 0      | 0     | 0 | 1       |
| rs17120370  | 11 | 117003388 | C | T | -1.758 | 0.07877 | -? | 0      | 0     | 0 | 1       |
| rs74735277  | 11 | 117003418 | T | C | -1.758 | 0.07877 | -? | 0      | 0     | 0 | 1       |
| rs75208249  | 11 | 117003623 | C | G | -1.758 | 0.07877 | -? | 0      | 0     | 0 | 1       |
| rs668781    | 11 | 119816512 | C | T | 1.758  | 0.07878 | +? | 0      | 0     | 0 | 1       |
| rs577853    | 11 | 116226263 | T | C | -1.757 | 0.07885 | -- | 47.8   | 5.752 | 1 | 0.01647 |
| rs4936556   | 11 | 120702026 | T | C | -1.757 | 0.07893 | -? | 0      | 0     | 0 | 1       |
| rs7925794   | 11 | 116278612 | T | C | -1.757 | 0.07896 | -? | 0      | 0     | 0 | 1       |
| rs17119760  | 11 | 116358711 | A | C | 1.757  | 0.079   | +? | 0      | 0     | 0 | 1       |
| rs11599940  | 11 | 120443297 | A | G | -1.755 | 0.0792  | -? | 0      | 0     | 0 | 1       |
| rs11602332  | 11 | 117449742 | A | G | -1.755 | 0.0792  | -- | 0      | 0.865 | 1 | 0.3523  |
| rs678468    | 11 | 117413864 | C | T | -1.755 | 0.07929 | -? | 0      | 0     | 0 | 1       |
| rs7103842   | 11 | 116958028 | A | G | -1.754 | 0.0794  | -? | 0      | 0     | 0 | 1       |
| rs520333    | 11 | 117708625 | A | G | 1.753  | 0.07952 | +? | 0      | 0     | 0 | 1       |
| rs17121080  | 11 | 117554152 | A | G | 1.753  | 0.07957 | +? | 0      | 0     | 0 | 1       |
| rs7932598   | 11 | 116197556 | T | G | -1.753 | 0.07964 | -? | 0      | 0     | 0 | 1       |
| rs10892470  | 11 | 119678986 | C | T | 1.753  | 0.07967 | ++ | 0      | 0.3   | 1 | 0.5836  |
| rs80170882  | 11 | 120556274 | T | C | -1.753 | 0.07967 | -? | 0      | 0     | 0 | 1       |
| rs496547    | 11 | 118576463 | A | T | -1.752 | 0.07969 | -- | 0      | 0.001 | 1 | 0.9797  |
| rs570521    | 11 | 119733857 | G | T | -1.751 | 0.07991 | -? | 0      | 0     | 0 | 1       |
| rs555075    | 11 | 117193203 | T | C | 1.751  | 0.07999 | +? | 0      | 0     | 0 | 1       |
| rs506234    | 11 | 118540104 | G | C | 1.748  | 0.08048 | ++ | 0      | 0.18  | 1 | 0.6712  |
| rs1574249   | 11 | 120500130 | A | G | 1.748  | 0.08049 | +? | 0      | 0     | 0 | 1       |
| rs143711539 | 11 | 118804671 | A | G | -1.747 | 0.08069 | -- | -160.2 | 1.153 | 1 | 0.2829  |
| rs675522    | 11 | 117385478 | C | G | 1.746  | 0.08085 | +? | 0      | 0     | 0 | 1       |
| rs1320685   | 11 | 119932930 | C | G | -1.746 | 0.08089 | -? | 0      | 0     | 0 | 1       |
| rs4938697   | 11 | 119507468 | C | T | -1.745 | 0.0809  | -? | 0      | 0     | 0 | 1       |

|              |    |           |   |   |        |         |    |        |       |   |        |
|--------------|----|-----------|---|---|--------|---------|----|--------|-------|---|--------|
| rs640888     | 11 | 117987746 | A | G | -1.744 | 0.08115 | -- | 0      | 0.016 | 1 | 0.8994 |
| rs7936516    | 11 | 120500604 | T | G | 1.743  | 0.08138 | +? | 0      | 0     | 0 | 1      |
| rs12293155   | 11 | 116423307 | G | A | -1.742 | 0.08145 | -? | 0      | 0     | 0 | 1      |
| rs652418     | 11 | 120841689 | C | T | 1.742  | 0.08152 | +? | 0      | 0     | 0 | 1      |
| rs542748     | 11 | 119797863 | C | G | 1.741  | 0.08163 | +? | 0      | 0     | 0 | 1      |
| rs11600378   | 11 | 118803842 | G | A | -1.741 | 0.08176 | -- | -158.5 | 1.16  | 1 | 0.2814 |
| rs594951     | 11 | 121011823 | C | T | 1.739  | 0.08202 | +? | 0      | 0     | 0 | 1      |
| rs4938705    | 11 | 119539324 | A | G | 1.738  | 0.08224 | +? | 0      | 0     | 0 | 1      |
| rs55897720   | 11 | 119937782 | G | A | -1.737 | 0.08231 | -? | 0      | 0     | 0 | 1      |
| rs6589616    | 11 | 117495049 | T | C | 1.737  | 0.08236 | +? | 0      | 0     | 0 | 1      |
| rs503542     | 11 | 118590743 | G | A | 1.737  | 0.08246 | +? | 0      | 0     | 0 | 1      |
| rs4938619    | 11 | 118890085 | T | C | -1.736 | 0.08253 | -- | 0      | 0.317 | 1 | 0.5736 |
| rs4447186    | 11 | 120445422 | G | A | -1.736 | 0.08257 | -? | 0      | 0     | 0 | 1      |
| rs2849167    | 11 | 116684744 | G | A | -1.735 | 0.08274 | -? | 0      | 0     | 0 | 1      |
| rs79985686   | 11 | 120425101 | C | T | 1.735  | 0.08282 | +? | 0      | 0     | 0 | 1      |
| rs2013131    | 11 | 117362198 | C | T | -1.734 | 0.08291 | -? | 0      | 0     | 0 | 1      |
| rs648389     | 11 | 118038697 | C | T | 1.733  | 0.08308 | +? | 0      | 0     | 0 | 1      |
| rs61904803   | 11 | 116429779 | C | T | -1.733 | 0.08312 | -? | 0      | 0     | 0 | 1      |
| rs527619     | 11 | 118563286 | A | G | 1.733  | 0.08318 | ++ | 0      | 0.186 | 1 | 0.6665 |
| rs11216585   | 11 | 117727584 | T | G | -1.732 | 0.08319 | -- | 0      | 0.013 | 1 | 0.9086 |
| rs12718466   | 11 | 116708663 | G | T | -1.731 | 0.0834  | -? | 0      | 0     | 0 | 1      |
| rs4938566    | 11 | 118721189 | T | A | 1.731  | 0.08343 | ++ | 0      | 0.221 | 1 | 0.6383 |
| rs4938567    | 11 | 118721249 | G | A | 1.731  | 0.08343 | ++ | 0      | 0.221 | 1 | 0.6383 |
| rs4938570    | 11 | 118722231 | G | A | 1.731  | 0.08343 | ++ | 0      | 0.221 | 1 | 0.6383 |
| rs7946961    | 11 | 118721850 | G | A | 1.731  | 0.08343 | ++ | 0      | 0.221 | 1 | 0.6383 |
| rs79365963   | 11 | 119730115 | C | T | -1.731 | 0.08351 | -? | 0      | 0     | 0 | 1      |
| rs597820     | 11 | 117911367 | C | A | -1.731 | 0.08353 | -- | 0      | 0.001 | 1 | 0.98   |
| rs61567742   | 11 | 116507206 | T | C | -1.731 | 0.08353 | -? | 0      | 0     | 0 | 1      |
| rs6589575    | 11 | 116733310 | C | T | 1.73   | 0.08358 | +? | 0      | 0     | 0 | 1      |
| rs608154     | 11 | 120838716 | G | A | 1.73   | 0.08361 | +? | 0      | 0     | 0 | 1      |
| rs11217059   | 11 | 118723087 | T | C | 1.727  | 0.08416 | ++ | 0      | 0.223 | 1 | 0.6367 |
| rs2846108    | 11 | 120588487 | T | C | 1.727  | 0.08423 | +? | 0      | 0     | 0 | 1      |
| rs3889570    | 11 | 117300040 | C | T | -1.726 | 0.08426 | -? | 0      | 0     | 0 | 1      |
| rs11217667   | 11 | 119935735 | A | C | -1.725 | 0.08446 | -? | 0      | 0     | 0 | 1      |
| rs2061293    | 11 | 117251521 | G | C | 1.725  | 0.08451 | +? | 0      | 0     | 0 | 1      |
| rs897836     | 11 | 117252489 | T | C | 1.725  | 0.08451 | +? | 0      | 0     | 0 | 1      |
| rs74651412   | 11 | 120735646 | A | G | -1.725 | 0.08455 | -? | 0      | 0     | 0 | 1      |
| rs4278519    | 11 | 120437188 | T | C | -1.725 | 0.08458 | -? | 0      | 0     | 0 | 1      |
| rs34144542   | 11 | 116774447 | G | A | -1.724 | 0.08468 | -? | 0      | 0     | 0 | 1      |
| rs718847     | 11 | 116734146 | C | T | 1.723  | 0.08488 | +? | 0      | 0     | 0 | 1      |
| rs11217918   | 11 | 120441843 | C | G | -1.722 | 0.08507 | -? | 0      | 0     | 0 | 1      |
| rs7120173    | 11 | 116829653 | G | T | -1.721 | 0.08527 | -? | 0      | 0     | 0 | 1      |
| rs80260914   | 11 | 120430224 | G | A | 1.72   | 0.08536 | +? | 0      | 0     | 0 | 1      |
| rs2509209    | 11 | 117102307 | G | A | 1.72   | 0.08537 | +? | 0      | 0     | 0 | 1      |
| rs12790243   | 11 | 117678543 | A | G | 1.72   | 0.0854  | +? | 0      | 0     | 0 | 1      |
| rs1359830167 | 11 | 117365915 | T | C | 1.72   | 0.08546 | +? | 0      | 0     | 0 | 1      |
| rs78462423   | 11 | 117551810 | A | G | 1.72   | 0.08551 | +? | 0      | 0     | 0 | 1      |
| rs79801588   | 11 | 119490788 | G | A | -1.719 | 0.08563 | -? | 0      | 0     | 0 | 1      |
| rs12575945   | 11 | 120425797 | A | C | 1.719  | 0.08564 | +? | 0      | 0     | 0 | 1      |
| rs61901398   | 11 | 120585097 | A | G | 1.718  | 0.08584 | +? | 0      | 0     | 0 | 1      |
| rs4938725    | 11 | 119674611 | G | A | 1.717  | 0.08589 | ++ | 0      | 0.244 | 1 | 0.6211 |
| rs11217118   | 11 | 118866072 | A | G | -1.717 | 0.08592 | -? | 0      | 0     | 0 | 1      |
| rs60708230   | 11 | 119935489 | A | G | -1.717 | 0.08595 | -? | 0      | 0     | 0 | 1      |
| rs4938605    | 11 | 118850707 | A | G | -1.717 | 0.08599 | -? | 0      | 0     | 0 | 1      |
| rs666191     | 11 | 118826063 | G | A | 1.717  | 0.08602 | ++ | 0      | 0     | 1 | 0.9865 |
| rs117228135  | 11 | 116225951 | A | G | -1.716 | 0.08614 | -? | 0      | 0     | 0 | 1      |

|             |    |           |   |   |        |         |   |   |       |   |        |
|-------------|----|-----------|---|---|--------|---------|---|---|-------|---|--------|
| rs72645459  | 11 | 116762157 | A | C | 1.715  | 0.08627 | + | 0 | 0     | 0 | 1      |
| rs685308    | 11 | 117897098 | G | C | 1.714  | 0.08653 | + | 0 | 0     | 0 | 1      |
| rs471840    | 11 | 116294634 | T | C | -1.713 | 0.08673 | - | 0 | 0     | 0 | 1      |
| rs3781817   | 11 | 120822377 | T | C | 1.713  | 0.08677 | + | 0 | 0     | 0 | 1      |
| rs17092713  | 11 | 117372488 | A | G | 1.712  | 0.08693 | + | 0 | 0     | 0 | 1      |
| rs2727791   | 11 | 116684562 | C | G | -1.711 | 0.08699 | - | 0 | 0     | 0 | 1      |
| rs7107020   | 11 | 117384412 | C | T | 1.711  | 0.08703 | + | 0 | 0     | 0 | 1      |
| rs580965    | 11 | 116279427 | C | T | -1.711 | 0.08708 | - | 0 | 0     | 0 | 1      |
| rs7126973   | 11 | 117503731 | T | A | 1.711  | 0.08712 | + | 0 | 0     | 0 | 1      |
| rs1893393   | 11 | 119936507 | A | T | -1.71  | 0.08718 | - | 0 | 0     | 0 | 1      |
| rs566848    | 11 | 118711830 | G | A | 1.71   | 0.0872  | + | 0 | 0.297 | 1 | 0.5859 |
| rs7103164   | 11 | 117560048 | A | G | 1.709  | 0.08742 | + | 0 | 0     | 0 | 1      |
| rs7108237   | 11 | 116428302 | A | G | -1.709 | 0.08746 | - | 0 | 0     | 0 | 1      |
| rs61900157  | 11 | 118824439 | A | C | 1.709  | 0.08752 | + | 0 | 0.027 | 1 | 0.8699 |
| rs78914704  | 11 | 119468521 | A | G | -1.708 | 0.08758 | - | 0 | 0     | 0 | 1      |
| rs7121316   | 11 | 120431744 | A | G | 1.708  | 0.08767 | + | 0 | 0     | 0 | 1      |
| rs477858    | 11 | 117219961 | G | A | 1.707  | 0.08779 | + | 0 | 0     | 0 | 1      |
| rs11216586  | 11 | 117727742 | C | G | -1.707 | 0.08782 | - | 0 | 0.017 | 1 | 0.8971 |
| rs12417682  | 11 | 117082109 | A | G | -1.707 | 0.08786 | - | 0 | 0     | 0 | 1      |
| rs540273    | 11 | 117197018 | T | C | 1.706  | 0.08798 | + | 0 | 0     | 0 | 1      |
| rs4938565   | 11 | 118720998 | A | G | 1.706  | 0.088   | + | 0 | 0.235 | 1 | 0.6281 |
| rs112201912 | 11 | 119733183 | A | G | -1.706 | 0.0881  | - | 0 | 0     | 0 | 1      |
| rs3018285   | 11 | 120787752 | C | T | -1.704 | 0.08836 | - | 0 | 0     | 0 | 1      |
| rs533848    | 11 | 116280688 | T | A | -1.704 | 0.08841 | - | 0 | 0     | 0 | 1      |
| rs479455    | 11 | 119795611 | T | G | 1.703  | 0.08856 | + | 0 | 0     | 0 | 1      |
| rs11607895  | 11 | 120606965 | T | C | 1.703  | 0.08859 | + | 0 | 0     | 0 | 1      |
| rs12786797  | 11 | 116887751 | A | G | -1.703 | 0.08863 | - | 0 | 0     | 0 | 1      |
| rs11218035  | 11 | 120736087 | T | C | -1.702 | 0.08876 | - | 0 | 0     | 0 | 1      |
| rs5069      | 11 | 116708254 | A | G | -1.702 | 0.08877 | - | 0 | 0     | 0 | 1      |
| rs625291    | 11 | 118826060 | C | T | 1.702  | 0.08877 | + | 0 | 0     | 1 | 0.9933 |
| rs5076      | 11 | 116707190 | A | G | -1.702 | 0.08882 | - | 0 | 0     | 0 | 1      |
| rs4936440   | 11 | 118720684 | G | C | 1.701  | 0.08891 | + | 0 | 0.237 | 1 | 0.6261 |
| rs139385687 | 11 | 116687156 | C | G | -1.7   | 0.08905 | - | 0 | 0     | 0 | 1      |
| rs10790355  | 11 | 119805958 | T | C | -1.7   | 0.0891  | - | 0 | 0     | 0 | 1      |
| rs4938274   | 11 | 116365351 | A | G | -1.7   | 0.08912 | - | 0 | 0     | 0 | 1      |
| rs73008407  | 11 | 117366513 | T | C | 1.7    | 0.08921 | + | 0 | 0     | 0 | 1      |
| rs115524104 | 11 | 117727740 | C | T | -1.699 | 0.08931 | - | 0 | 0.018 | 1 | 0.8935 |
| rs4459318   | 11 | 119541778 | T | C | 1.699  | 0.08933 | + | 0 | 0     | 0 | 1      |
| rs4938706   | 11 | 119539364 | A | G | 1.699  | 0.0894  | + | 0 | 0     | 0 | 1      |
| rs12283999  | 11 | 120431935 | G | C | 1.697  | 0.08961 | + | 0 | 0     | 0 | 1      |
| rs586304    | 11 | 117902169 | T | A | -1.697 | 0.08975 | - | 0 | 0     | 0 | 1      |
| rs7942824   | 11 | 117353294 | T | G | -1.696 | 0.08987 | - | 0 | 0     | 0 | 1      |
| rs59626457  | 11 | 118862634 | G | A | -1.696 | 0.0899  | - | 0 | 0     | 0 | 1      |
| rs555749    | 11 | 116530765 | T | C | -1.695 | 0.09002 | - | 0 | 0     | 0 | 1      |
| rs7101528   | 11 | 116698665 | A | G | -1.694 | 0.09027 | - | 0 | 0     | 0 | 1      |
| rs586112    | 11 | 119921812 | C | G | 1.694  | 0.09031 | + | 0 | 0     | 0 | 1      |
| rs7123326   | 11 | 116696681 | A | G | -1.694 | 0.09033 | - | 0 | 0     | 0 | 1      |
| rs632137    | 11 | 120247033 | T | C | 1.693  | 0.09043 | + | 0 | 0     | 0 | 1      |
| rs116954303 | 11 | 118326218 | A | G | -1.693 | 0.09051 | - | 0 | 0.648 | 1 | 0.4208 |
| rs12281009  | 11 | 117032959 | G | A | -1.692 | 0.09058 | - | 0 | 0     | 0 | 1      |
| rs10892146  | 11 | 117500542 | T | A | 1.692  | 0.09074 | + | 0 | 0     | 0 | 1      |
| rs4456264   | 11 | 118851138 | T | C | -1.691 | 0.09076 | - | 0 | 0     | 0 | 1      |
| rs12718463  | 11 | 116706343 | C | T | -1.691 | 0.09079 | - | 0 | 0     | 0 | 1      |
| rs485030    | 11 | 119029849 | T | C | -1.691 | 0.09086 | - | 0 | 0     | 0 | 1      |
| rs79643426  | 11 | 116239462 | T | C | -1.691 | 0.09087 | - | 0 | 0     | 0 | 1      |
| rs529373    | 11 | 119793573 | T | C | 1.691  | 0.09093 | + | 0 | 0     | 0 | 1      |

|             |    |           |   |   |        |         |    |   |       |   |        |
|-------------|----|-----------|---|---|--------|---------|----|---|-------|---|--------|
| rs665759    | 11 | 119793489 | A | G | 1.691  | 0.09093 | +  | 0 | 0     | 0 | 1      |
| rs11217116  | 11 | 118864140 | C | T | -1.69  | 0.09099 | -  | 0 | 0     | 0 | 1      |
| rs12362865  | 11 | 118859842 | G | A | -1.69  | 0.09101 | -  | 0 | 0     | 0 | 1      |
| rs4426142   | 11 | 118824996 | G | A | 1.69   | 0.09101 | +  | 0 | 0.023 | 1 | 0.8802 |
| rs551163    | 11 | 119795594 | A | C | 1.69   | 0.09108 | +  | 0 | 0     | 0 | 1      |
| rs10892172  | 11 | 117672474 | A | C | 1.69   | 0.09109 | +  | 0 | 0     | 0 | 1      |
| rs470679    | 11 | 118926720 | A | C | -1.689 | 0.09113 | -  | 0 | 0     | 0 | 1      |
| rs116672969 | 11 | 117549963 | A | G | 1.689  | 0.09115 | +  | 0 | 0     | 0 | 1      |
| rs500401    | 11 | 119729992 | T | C | -1.689 | 0.09118 | -  | 0 | 0     | 0 | 1      |
| rs12418705  | 11 | 117084396 | T | C | -1.689 | 0.09124 | -  | 0 | 0     | 0 | 1      |
| rs4938558   | 11 | 118717929 | T | C | 1.689  | 0.09124 | +  | 0 | 0.227 | 1 | 0.6341 |
| rs11217112  | 11 | 118856920 | G | A | -1.689 | 0.09126 | -  | 0 | 0     | 0 | 1      |
| rs4936455   | 11 | 118861389 | T | C | -1.689 | 0.09126 | -  | 0 | 0     | 0 | 1      |
| rs7118532   | 11 | 119540470 | G | A | 1.689  | 0.09126 | +  | 0 | 0     | 0 | 1      |
| rs9794909   | 11 | 118862306 | C | G | -1.689 | 0.09126 | -  | 0 | 0     | 0 | 1      |
| rs59316586  | 11 | 118856816 | C | A | -1.688 | 0.09139 | -  | 0 | 0     | 0 | 1      |
| rs4938414   | 11 | 117464712 | A | G | -1.687 | 0.09153 | -- | 0 | 0.844 | 1 | 0.3583 |
| rs1145208   | 11 | 116637985 | C | A | 1.687  | 0.09161 | +  | 0 | 0.003 | 1 | 0.9548 |
| rs11825496  | 11 | 118855221 | G | T | -1.687 | 0.09164 | -  | 0 | 0     | 0 | 1      |
| rs4936454   | 11 | 118859274 | T | C | -1.687 | 0.09164 | -  | 0 | 0     | 0 | 1      |
| rs45527340  | 11 | 118852526 | G | C | -1.686 | 0.0918  | -  | 0 | 0     | 0 | 1      |
| rs477113    | 11 | 119723230 | C | T | 1.686  | 0.09188 | +  | 0 | 0     | 0 | 1      |
| rs556034    | 11 | 117195136 | G | C | 1.685  | 0.09192 | +  | 0 | 0     | 0 | 1      |
| rs2156749   | 11 | 118719405 | G | C | 1.684  | 0.09215 | +  | 0 | 0.219 | 1 | 0.6396 |
| rs2156750   | 11 | 118719254 | C | T | 1.684  | 0.09215 | +  | 0 | 0.219 | 1 | 0.6396 |
| rs7116715   | 11 | 118719742 | C | T | 1.684  | 0.09215 | +  | 0 | 0.219 | 1 | 0.6396 |
| rs12574810  | 11 | 116869560 | G | A | -1.683 | 0.09244 | -  | 0 | 0     | 0 | 1      |
| rs145384144 | 11 | 117017839 | C | G | -1.682 | 0.09253 | -  | 0 | 0     | 0 | 1      |
| rs67215893  | 11 | 116343033 | A | G | 1.681  | 0.09275 | +  | 0 | 0     | 0 | 1      |
| rs61901289  | 11 | 119352350 | T | G | -1.681 | 0.09278 | -  | 0 | 0     | 0 | 1      |
| rs2727788   | 11 | 116698963 | A | C | -1.681 | 0.09283 | -  | 0 | 0     | 0 | 1      |
| rs2051479   | 11 | 117953051 | G | A | -1.681 | 0.09285 | -- | 0 | 0.234 | 1 | 0.6285 |
| rs2156751   | 11 | 118718856 | G | A | 1.68   | 0.093   | +  | 0 | 0.222 | 1 | 0.6378 |
| rs2187491   | 11 | 118718972 | C | T | 1.68   | 0.093   | +  | 0 | 0.222 | 1 | 0.6378 |
| rs10790213  | 11 | 117706667 | T | A | -1.677 | 0.09357 | -  | 0 | 0     | 0 | 1      |
| rs471750    | 11 | 116294664 | G | A | 1.676  | 0.09368 | +  | 0 | 0     | 0 | 1      |
| rs3213459   | 11 | 117062489 | C | T | -1.676 | 0.09372 | -  | 0 | 0     | 0 | 1      |
| rs4938564   | 11 | 118720590 | T | G | 1.676  | 0.09374 | +  | 0 | 0.252 | 1 | 0.616  |
| rs2186761   | 11 | 117467394 | A | G | -1.676 | 0.09381 | -- | 0 | 0.842 | 1 | 0.3589 |
| rs80220270  | 11 | 116680961 | C | A | -1.675 | 0.0939  | -  | 0 | 0     | 0 | 1      |
| rs544154    | 11 | 116291707 | A | G | -1.674 | 0.09414 | -  | 0 | 0     | 0 | 1      |
| rs1790191   | 11 | 118825636 | A | G | 1.674  | 0.0942  | +  | 0 | 0.043 | 1 | 0.8366 |
| rs544096    | 11 | 118594326 | G | A | 1.674  | 0.09421 | +  | 0 | 0.457 | 1 | 0.4991 |
| rs10892666  | 11 | 120936096 | T | G | -1.673 | 0.09424 | -  | 0 | 0     | 0 | 1      |
| rs642878    | 11 | 119907777 | A | G | 1.673  | 0.09427 | +  | 0 | 0     | 0 | 1      |
| rs2097131   | 11 | 118825069 | G | A | 1.672  | 0.09456 | +  | 0 | 0.02  | 1 | 0.8884 |
| rs73011533  | 11 | 120890870 | A | G | -1.672 | 0.09461 | -  | 0 | 0     | 0 | 1      |
| rs2846107   | 11 | 120589674 | A | G | 1.671  | 0.09471 | +  | 0 | 0     | 0 | 1      |
| rs56316258  | 11 | 117341717 | G | C | -1.67  | 0.09486 | -  | 0 | 0     | 0 | 1      |
| rs2849174   | 11 | 116697066 | A | G | -1.67  | 0.09491 | -  | 0 | 0     | 0 | 1      |
| rs12416923  | 11 | 117340239 | A | G | 1.669  | 0.09503 | +  | 0 | 0     | 0 | 1      |
| rs661139    | 11 | 120235874 | A | T | 1.669  | 0.09508 | +  | 0 | 0     | 0 | 1      |
| rs4938670   | 11 | 119398847 | G | A | -1.668 | 0.09532 | -  | 0 | 0     | 0 | 1      |
| rs151220469 | 11 | 116613464 | A | G | -1.667 | 0.09557 | -  | 0 | 0     | 0 | 1      |
| rs874195    | 11 | 119864218 | G | A | 1.667  | 0.0956  | +  | 0 | 0     | 0 | 1      |
| rs137996620 | 11 | 118221655 | C | A | 1.666  | 0.0957  | +  | 0 | 0     | 0 | 1      |

|             |    |           |   |   |        |         |    |   |       |   |        |
|-------------|----|-----------|---|---|--------|---------|----|---|-------|---|--------|
| rs673028    | 11 | 117518200 | G | A | 1.666  | 0.09571 | +? | 0 | 0     | 0 | 1      |
| rs149421321 | 11 | 117898446 | T | C | 1.666  | 0.09575 | +? | 0 | 0     | 0 | 1      |
| rs2156755   | 11 | 118726230 | A | G | 1.665  | 0.09583 | ++ | 0 | 0.157 | 1 | 0.6918 |
| rs7943240   | 11 | 116439602 | C | T | -1.665 | 0.09584 | -? | 0 | 0     | 0 | 1      |
| rs594711    | 11 | 120992188 | T | C | -1.665 | 0.09595 | -- | 0 | 0.11  | 1 | 0.7399 |
| rs7937420   | 11 | 117953688 | A | G | 1.664  | 0.09605 | ++ | 0 | 0.413 | 1 | 0.5206 |
| rs6589617   | 11 | 117501339 | T | C | 1.664  | 0.09607 | +? | 0 | 0     | 0 | 1      |
| rs693603    | 11 | 116296243 | A | G | 1.663  | 0.09628 | +? | 0 | 0     | 0 | 1      |
| rs4936451   | 11 | 118852137 | T | C | -1.663 | 0.09631 | -? | 0 | 0     | 0 | 1      |
| rs11603573  | 11 | 119928865 | G | C | -1.663 | 0.09637 | -? | 0 | 0     | 0 | 1      |
| rs12279486  | 11 | 116428225 | T | C | -1.663 | 0.09637 | -? | 0 | 0     | 0 | 1      |
| rs34095499  | 11 | 116349950 | A | G | 1.662  | 0.09647 | +? | 0 | 0     | 0 | 1      |
| rs7103314   | 11 | 118723537 | G | A | 1.662  | 0.0966  | ++ | 0 | 0.11  | 1 | 0.7407 |
| rs11605883  | 11 | 117064776 | G | C | -1.662 | 0.09661 | -? | 0 | 0     | 0 | 1      |
| rs2000528   | 11 | 120903752 | G | A | -1.662 | 0.09661 | -? | 0 | 0     | 0 | 1      |
| rs576764    | 11 | 119795133 | G | A | 1.661  | 0.09677 | +? | 0 | 0     | 0 | 1      |
| rs12273687  | 11 | 118852641 | T | G | -1.66  | 0.09684 | -? | 0 | 0     | 0 | 1      |
| rs11217062  | 11 | 118725420 | A | G | 1.66   | 0.09688 | ++ | 0 | 0.158 | 1 | 0.6913 |
| rs17174502  | 11 | 116759655 | A | G | 1.66   | 0.09698 | +? | 0 | 0     | 0 | 1      |
| rs17475326  | 11 | 116223780 | T | A | -1.659 | 0.09711 | -? | 0 | 0     | 0 | 1      |
| rs77661993  | 11 | 117010474 | C | A | -1.658 | 0.09731 | -? | 0 | 0     | 0 | 1      |
| rs649827    | 11 | 117906759 | T | C | -1.657 | 0.0975  | -? | 0 | 0     | 0 | 1      |
| rs1942011   | 11 | 119915024 | T | C | -1.657 | 0.09753 | -? | 0 | 0     | 0 | 1      |
| rs630332    | 11 | 119885462 | A | G | 1.656  | 0.09771 | +? | 0 | 0     | 0 | 1      |
| rs7131215   | 11 | 120474370 | G | C | -1.655 | 0.09784 | -? | 0 | 0     | 0 | 1      |
| rs66991573  | 11 | 117342348 | C | A | -1.655 | 0.09792 | -? | 0 | 0     | 0 | 1      |
| rs676134    | 11 | 117179891 | T | C | 1.653  | 0.09825 | +? | 0 | 0     | 0 | 1      |
| rs67533649  | 11 | 118835272 | G | A | -1.653 | 0.09834 | -? | 0 | 0     | 0 | 1      |
| rs563828    | 11 | 117221170 | T | G | -1.651 | 0.09873 | -? | 0 | 0     | 0 | 1      |
| rs115991973 | 11 | 117010091 | A | G | -1.651 | 0.09883 | -? | 0 | 0     | 0 | 1      |
| rs116384608 | 11 | 117010123 | G | A | -1.651 | 0.09883 | -? | 0 | 0     | 0 | 1      |
| rs4936456   | 11 | 118863324 | T | C | -1.65  | 0.09904 | -? | 0 | 0     | 0 | 1      |
| rs4938613   | 11 | 118863116 | G | A | -1.65  | 0.09904 | -? | 0 | 0     | 0 | 1      |
| rs12419178  | 11 | 117050918 | T | C | -1.649 | 0.09905 | -? | 0 | 0     | 0 | 1      |
| rs12799198  | 11 | 116801422 | T | C | -1.649 | 0.09908 | -? | 0 | 0     | 0 | 1      |
| rs4938561   | 11 | 118718485 | C | T | 1.649  | 0.09912 | ++ | 0 | 0.174 | 1 | 0.6765 |
| rs496164    | 11 | 117711232 | A | G | -1.649 | 0.09914 | -? | 0 | 0     | 0 | 1      |
| rs4420279   | 11 | 118835677 | A | C | -1.648 | 0.09926 | -? | 0 | 0     | 0 | 1      |
| rs113968937 | 11 | 117329289 | G | C | -1.648 | 0.09934 | -? | 0 | 0     | 0 | 1      |
| rs6589717   | 11 | 118979026 | T | C | 1.647  | 0.09963 | +? | 0 | 0     | 0 | 1      |
| rs7940073   | 11 | 118978411 | G | C | 1.647  | 0.09963 | +? | 0 | 0     | 0 | 1      |
| rs74594162  | 11 | 117346121 | G | C | -1.646 | 0.09972 | -? | 0 | 0     | 0 | 1      |
| rs1242695   | 11 | 117200943 | T | G | -1.646 | 0.09979 | -? | 0 | 0     | 0 | 1      |
| rs2279013   | 11 | 117283091 | C | T | 1.646  | 0.09983 | +? | 0 | 0     | 0 | 1      |
| rs949055    | 11 | 120779520 | C | T | -1.645 | 0.09993 | -? | 0 | 0     | 0 | 1      |
| rs650908    | 11 | 117907041 | C | G | -1.645 | 0.09995 | -? | 0 | 0     | 0 | 1      |
| rs11827260  | 11 | 117560822 | C | G | 1.644  | 0.1002  | +? | 0 | 0     | 0 | 1      |
| rs73008672  | 11 | 119733584 | T | C | -1.644 | 0.1002  | -? | 0 | 0     | 0 | 1      |
| rs36111344  | 11 | 120437187 | G | A | -1.643 | 0.1003  | -? | 0 | 0     | 0 | 1      |
| rs56287831  | 11 | 116317789 | A | G | 1.643  | 0.1003  | +? | 0 | 0     | 0 | 1      |
| rs73000621  | 11 | 120437572 | T | C | -1.643 | 0.1003  | -? | 0 | 0     | 0 | 1      |
| rs7925845   | 11 | 116403905 | G | A | -1.643 | 0.1004  | -? | 0 | 0     | 0 | 1      |
| rs1231418   | 11 | 121079478 | C | G | 1.641  | 0.1007  | +? | 0 | 0     | 0 | 1      |
| rs7395947   | 11 | 119397680 | C | T | -1.641 | 0.1007  | -? | 0 | 0     | 0 | 1      |
| rs10502245  | 11 | 120923495 | A | G | -1.641 | 0.1009  | -? | 0 | 0     | 0 | 1      |
| rs10892665  | 11 | 120923899 | G | C | -1.641 | 0.1009  | -? | 0 | 0     | 0 | 1      |

|              |    |           |   |   |        |        |    |        |       |   |         |
|--------------|----|-----------|---|---|--------|--------|----|--------|-------|---|---------|
| rs73006788   | 11 | 119663944 | T | C | -1.641 | 0.1009 | -? | 0      | 0     | 0 | 1       |
| rs540800     | 11 | 118565651 | A | G | 1.64   | 0.1011 | ++ | 0      | 0.286 | 1 | 0.5926  |
| rs11218137   | 11 | 120950752 | C | T | -1.639 | 0.1012 | -? | 0      | 0     | 0 | 1       |
| rs10790198   | 11 | 117515365 | A | G | 1.639  | 0.1013 | +? | 0      | 0     | 0 | 1       |
| rs7126193    | 11 | 118866126 | C | T | -1.639 | 0.1013 | -? | 0      | 0     | 0 | 1       |
| rs2252490    | 11 | 120417065 | C | G | 1.638  | 0.1014 | +? | 0      | 0     | 0 | 1       |
| rs2368937    | 11 | 119674095 | C | T | 1.638  | 0.1014 | ++ | 0      | 0.201 | 1 | 0.6536  |
| rs650535     | 11 | 117414385 | T | C | -1.638 | 0.1015 | -? | 0      | 0     | 0 | 1       |
| rs61905133   | 11 | 116678191 | G | A | -1.637 | 0.1016 | -? | 0      | 0     | 0 | 1       |
| rs519991     | 11 | 117711562 | C | T | -1.637 | 0.1017 | -? | 0      | 0     | 0 | 1       |
| rs2070665    | 11 | 116707684 | A | G | 1.636  | 0.1018 | +? | 0      | 0     | 0 | 1       |
| rs76883864   | 11 | 117051725 | T | C | -1.636 | 0.1018 | -? | 0      | 0     | 0 | 1       |
| rs77638281   | 11 | 118811315 | A | G | -1.634 | 0.1023 | -- | -173.7 | 1.096 | 1 | 0.2951  |
| rs12364667   | 11 | 117675286 | G | T | 1.633  | 0.1024 | +? | 0      | 0     | 0 | 1       |
| rs879412     | 11 | 116372414 | A | G | 1.633  | 0.1024 | +? | 0      | 0     | 0 | 1       |
| rs587806     | 11 | 119882908 | T | C | 1.632  | 0.1026 | +? | 0      | 0     | 0 | 1       |
| rs11217623   | 11 | 119870780 | T | C | 1.632  | 0.1027 | +? | 0      | 0     | 0 | 1       |
| rs11217924   | 11 | 120475835 | T | C | -1.632 | 0.1027 | -? | 0      | 0     | 0 | 1       |
| rs12793318   | 11 | 119703523 | A | G | -1.632 | 0.1027 | -? | 0      | 0     | 0 | 1       |
| rs2046149    | 11 | 117054709 | G | C | -1.631 | 0.1028 | -? | 0      | 0     | 0 | 1       |
| rs11216515   | 11 | 117593119 | C | T | -1.631 | 0.1029 | -? | 0      | 0     | 0 | 1       |
| rs12417961   | 11 | 117318533 | T | C | 1.631  | 0.1029 | +? | 0      | 0     | 0 | 1       |
| rs2252648    | 11 | 120415557 | C | A | 1.631  | 0.1029 | +? | 0      | 0     | 0 | 1       |
| rs11218094   | 11 | 120858815 | T | G | 1.63   | 0.103  | +? | 0      | 0     | 0 | 1       |
| rs75538174   | 11 | 119486336 | C | A | -1.63  | 0.103  | -? | 0      | 0     | 0 | 1       |
| rs10736496   | 11 | 118975113 | A | G | 1.63   | 0.1031 | +? | 0      | 0     | 0 | 1       |
| rs10790283   | 11 | 118975927 | A | G | 1.63   | 0.1031 | +? | 0      | 0     | 0 | 1       |
| rs1793178    | 11 | 117987483 | A | C | -1.63  | 0.1031 | -- | 0      | 0.016 | 1 | 0.9005  |
| rs4938628    | 11 | 118974878 | T | A | 1.63   | 0.1031 | +? | 0      | 0     | 0 | 1       |
| rs4938629    | 11 | 118975426 | C | T | 1.63   | 0.1031 | +? | 0      | 0     | 0 | 1       |
| rs10790363   | 11 | 119941807 | A | G | 1.629  | 0.1033 | +? | 0      | 0     | 0 | 1       |
| rs11216584   | 11 | 117727549 | G | A | -1.628 | 0.1035 | -- | 0      | 0.03  | 1 | 0.8615  |
| rs1312592595 | 11 | 117030633 | C | T | -1.627 | 0.1037 | -? | 0      | 0     | 0 | 1       |
| rs78064538   | 11 | 117346653 | C | G | -1.627 | 0.1037 | -? | 0      | 0     | 0 | 1       |
| rs1624780    | 11 | 118134785 | T | G | -1.625 | 0.1041 | -? | 0      | 0     | 0 | 1       |
| rs2850802    | 11 | 119881100 | A | G | 1.625  | 0.1041 | +? | 0      | 0     | 0 | 1       |
| rs3758998    | 11 | 117946941 | A | C | 1.625  | 0.1042 | +- | -1.1   | 2.967 | 1 | 0.08497 |
| rs7105963    | 11 | 120468752 | T | C | -1.625 | 0.1042 | -? | 0      | 0     | 0 | 1       |
| rs10892501   | 11 | 119818622 | G | A | 1.624  | 0.1043 | +? | 0      | 0     | 0 | 1       |
| rs7120727    | 11 | 120585020 | C | G | 1.624  | 0.1043 | +? | 0      | 0     | 0 | 1       |
| rs116941106  | 11 | 117335035 | A | G | -1.623 | 0.1046 | -? | 0      | 0     | 0 | 1       |
| rs7939112    | 11 | 120837575 | A | G | 1.623  | 0.1046 | +? | 0      | 0     | 0 | 1       |
| rs1893816    | 11 | 120798629 | T | C | 1.622  | 0.1047 | +? | 0      | 0     | 0 | 1       |
| rs2195526    | 11 | 119236751 | T | C | -1.622 | 0.1047 | -? | 0      | 0     | 0 | 1       |
| rs4936413    | 11 | 117842818 | C | T | -1.622 | 0.1048 | -- | 0      | 0.013 | 1 | 0.9081  |
| rs13377544   | 11 | 117647364 | A | T | -1.622 | 0.1049 | -? | 0      | 0     | 0 | 1       |
| rs475159     | 11 | 119732432 | T | G | -1.62  | 0.1052 | -? | 0      | 0     | 0 | 1       |
| rs4938595    | 11 | 118832582 | T | G | -1.62  | 0.1053 | -? | 0      | 0     | 0 | 1       |
| rs9787805    | 11 | 119866879 | C | G | 1.619  | 0.1054 | +? | 0      | 0     | 0 | 1       |
| rs587793     | 11 | 119882896 | C | T | 1.618  | 0.1056 | +? | 0      | 0     | 0 | 1       |
| rs117440454  | 11 | 117946849 | T | C | -1.617 | 0.1058 | -? | 0      | 0     | 0 | 1       |
| rs3016863    | 11 | 117908328 | A | G | -1.617 | 0.1058 | -- | 0      | 0.274 | 1 | 0.6009  |
| rs77719730   | 11 | 117611938 | A | G | -1.617 | 0.1058 | -? | 0      | 0     | 0 | 1       |
| rs670526     | 11 | 118938882 | C | T | -1.616 | 0.106  | -? | 0      | 0     | 0 | 1       |
| rs688099     | 11 | 121072088 | A | C | 1.616  | 0.1061 | +? | 0      | 0     | 0 | 1       |
| rs7948885    | 11 | 120834991 | A | G | 1.615  | 0.1063 | +? | 0      | 0     | 0 | 1       |

|             |    |           |   |   |        |        |    |        |       |   |        |
|-------------|----|-----------|---|---|--------|--------|----|--------|-------|---|--------|
| rs895653    | 11 | 119818789 | A | T | 1.615  | 0.1063 | +  | 0      | 0     | 0 | 1      |
| rs10892023  | 11 | 116598248 | T | C | -1.614 | 0.1065 | -- | 0      | 0.071 | 1 | 0.7898 |
| rs1616199   | 11 | 118146462 | T | C | 1.614  | 0.1066 | +  | 0      | 0     | 0 | 1      |
| rs2248404   | 11 | 120428134 | A | G | 1.614  | 0.1066 | +  | 0      | 0     | 0 | 1      |
| rs471028    | 11 | 118928393 | C | G | -1.614 | 0.1066 | -  | 0      | 0     | 0 | 1      |
| rs647432    | 11 | 118932610 | T | C | -1.614 | 0.1066 | -  | 0      | 0     | 0 | 1      |
| rs117235696 | 11 | 118803193 | G | T | -1.613 | 0.1068 | -- | -126.7 | 1.323 | 1 | 0.25   |
| rs488485    | 11 | 116283172 | T | C | 1.613  | 0.1068 | +  | 0      | 0     | 0 | 1      |
| rs75524659  | 11 | 120468093 | T | C | -1.613 | 0.1068 | -  | 0      | 0     | 0 | 1      |
| rs10892298  | 11 | 118724336 | C | T | 1.612  | 0.1069 | ++ | 0      | 0.129 | 1 | 0.7195 |
| rs12273031  | 11 | 120450358 | A | G | -1.611 | 0.1071 | -  | 0      | 0     | 0 | 1      |
| rs12366015  | 11 | 116990851 | A | G | 1.611  | 0.1072 | +  | 0      | 0     | 0 | 1      |
| rs4938627   | 11 | 118974869 | A | G | 1.611  | 0.1072 | +  | 0      | 0     | 0 | 1      |
| rs2252634   | 11 | 120415823 | T | C | 1.61   | 0.1073 | +  | 0      | 0     | 0 | 1      |
| rs76388159  | 11 | 116292201 | G | A | -1.61  | 0.1074 | -  | 0      | 0     | 0 | 1      |
| rs11606480  | 11 | 117065533 | A | G | -1.61  | 0.1075 | -  | 0      | 0     | 0 | 1      |
| rs12419470  | 11 | 117061775 | T | C | -1.61  | 0.1075 | -  | 0      | 0     | 0 | 1      |
| rs1452842   | 11 | 119911542 | G | A | -1.61  | 0.1075 | -  | 0      | 0     | 0 | 1      |
| rs3781985   | 11 | 117065066 | C | G | -1.61  | 0.1075 | -  | 0      | 0     | 0 | 1      |
| rs61703672  | 11 | 117061825 | T | C | -1.61  | 0.1075 | -  | 0      | 0     | 0 | 1      |
| rs80183569  | 11 | 117065153 | A | G | -1.61  | 0.1075 | -  | 0      | 0     | 0 | 1      |
| rs11218125  | 11 | 120921109 | C | T | -1.609 | 0.1076 | -  | 0      | 0     | 0 | 1      |
| rs643295    | 11 | 117927789 | T | A | -1.609 | 0.1076 | -  | 0      | 0     | 0 | 1      |
| rs9787801   | 11 | 119866718 | A | G | 1.609  | 0.1076 | +  | 0      | 0     | 0 | 1      |
| rs4938457   | 11 | 117792611 | T | C | -1.608 | 0.1079 | -  | 0      | 0     | 0 | 1      |
| rs939274    | 11 | 118134065 | T | G | -1.608 | 0.1079 | -  | 0      | 0     | 0 | 1      |
| rs111607963 | 11 | 117502729 | T | C | -1.607 | 0.108  | -  | 0      | 0     | 0 | 1      |
| rs73580446  | 11 | 116304705 | T | G | -1.607 | 0.108  | -  | 0      | 0     | 0 | 1      |
| rs116534827 | 11 | 120568363 | G | C | 1.606  | 0.1083 | +  | 0      | 0     | 0 | 1      |
| rs61902689  | 11 | 120568477 | T | G | 1.606  | 0.1083 | +  | 0      | 0     | 0 | 1      |
| rs1944499   | 11 | 119875786 | A | G | -1.605 | 0.1084 | -  | 0      | 0     | 0 | 1      |
| rs2155465   | 11 | 121004439 | G | C | 1.605  | 0.1084 | +  | 0      | 0     | 0 | 1      |
| rs473057    | 11 | 117712887 | G | A | -1.605 | 0.1085 | -  | 0      | 0     | 0 | 1      |
| rs12419272  | 11 | 117015516 | G | C | -1.605 | 0.1086 | -  | 0      | 0     | 0 | 1      |
| rs12420127  | 11 | 117035319 | G | A | -1.605 | 0.1086 | -  | 0      | 0     | 0 | 1      |
| rs186331126 | 11 | 116823972 | G | T | -1.605 | 0.1086 | -  | 0      | 0     | 0 | 1      |
| rs646543    | 11 | 120853577 | C | T | 1.605  | 0.1086 | +  | 0      | 0     | 0 | 1      |
| rs11218135  | 11 | 120944219 | G | A | -1.604 | 0.1088 | -  | 0      | 0     | 0 | 1      |
| rs58204590  | 11 | 120946892 | G | A | -1.604 | 0.1088 | -  | 0      | 0     | 0 | 1      |
| rs687190    | 11 | 118542383 | C | T | 1.603  | 0.109  | ++ | 0      | 0.174 | 1 | 0.6763 |
| rs650104    | 11 | 117912720 | T | C | -1.602 | 0.1091 | -- | 0      | 0.234 | 1 | 0.6285 |
| rs686047    | 11 | 117908235 | A | G | -1.602 | 0.1091 | -- | 0      | 0.267 | 1 | 0.6052 |
| rs947931    | 11 | 118577614 | G | T | -1.602 | 0.1091 | -  | 0      | 0     | 0 | 1      |
| rs76406762  | 11 | 116220390 | A | C | -1.601 | 0.1093 | -  | 0      | 0     | 0 | 1      |
| rs471000    | 11 | 118936910 | T | C | -1.601 | 0.1094 | -  | 0      | 0     | 0 | 1      |
| rs1939333   | 11 | 119907974 | C | T | -1.6   | 0.1095 | -  | 0      | 0     | 0 | 1      |
| rs584620    | 11 | 119882187 | T | C | 1.6    | 0.1095 | +  | 0      | 0     | 0 | 1      |
| rs116773440 | 11 | 117039461 | C | A | -1.6   | 0.1097 | -  | 0      | 0     | 0 | 1      |
| rs142017584 | 11 | 117031363 | A | G | -1.599 | 0.1098 | -  | 0      | 0     | 0 | 1      |
| rs34051198  | 11 | 119734332 | A | G | -1.599 | 0.1098 | -  | 0      | 0     | 0 | 1      |
| rs79865588  | 11 | 117341574 | C | T | -1.599 | 0.1098 | -  | 0      | 0     | 0 | 1      |
| rs61900158  | 11 | 118831764 | A | T | -1.599 | 0.1099 | -  | 0      | 0     | 0 | 1      |
| rs3212282   | 11 | 116601945 | A | G | -1.598 | 0.11   | -- | 0      | 0.126 | 1 | 0.7226 |
| rs74330115  | 11 | 119806104 | A | G | -1.598 | 0.1101 | -  | 0      | 0     | 0 | 1      |
| rs76264435  | 11 | 119813521 | A | G | 1.597  | 0.1102 | +  | 0      | 0     | 0 | 1      |
| rs601817    | 11 | 120843834 | C | T | 1.597  | 0.1103 | +  | 0      | 0     | 0 | 1      |

|              |    |           |   |   |        |        |    |      |       |   |          |
|--------------|----|-----------|---|---|--------|--------|----|------|-------|---|----------|
| rs553062     | 11 | 117421425 | A | G | -1.596 | 0.1104 | -? | 0    | 0     | 0 | 1        |
| rs689054     | 11 | 117912731 | T | A | -1.596 | 0.1105 | -- | 0    | 0.245 | 1 | 0.6207   |
| rs1944511    | 11 | 119863584 | A | G | -1.596 | 0.1106 | -? | 0    | 0     | 0 | 1        |
| rs506842     | 11 | 119724144 | C | G | 1.596  | 0.1106 | +? | 0    | 0     | 0 | 1        |
| rs11218078   | 11 | 120824692 | G | T | 1.595  | 0.1107 | +? | 0    | 0     | 0 | 1        |
| rs527778     | 11 | 116479584 | T | G | 1.595  | 0.1107 | +? | 0    | 0     | 0 | 1        |
| rs7947524    | 11 | 117671091 | T | C | 1.595  | 0.1107 | +? | 0    | 0     | 0 | 1        |
| rs78474864   | 11 | 120847827 | A | G | -1.593 | 0.1112 | -? | 0    | 0     | 0 | 1        |
| rs11216587   | 11 | 117727965 | T | C | -1.592 | 0.1113 | -- | 0    | 0.002 | 1 | 0.962    |
| rs4938299    | 11 | 116565732 | A | G | 1.592  | 0.1114 | +? | 0    | 0     | 0 | 1        |
| rs12417984   | 11 | 117017714 | A | G | -1.591 | 0.1115 | -? | 0    | 0     | 0 | 1        |
| rs12418349   | 11 | 117025932 | G | A | -1.591 | 0.1115 | -? | 0    | 0     | 0 | 1        |
| rs12419436   | 11 | 117017455 | G | T | -1.591 | 0.1115 | -? | 0    | 0     | 0 | 1        |
| rs12420250   | 11 | 117028727 | A | G | -1.591 | 0.1115 | -? | 0    | 0     | 0 | 1        |
| rs12420725   | 11 | 117017530 | G | A | -1.591 | 0.1115 | -? | 0    | 0     | 0 | 1        |
| rs139146464  | 11 | 117019867 | G | A | -1.591 | 0.1115 | -? | 0    | 0     | 0 | 1        |
| rs139864910  | 11 | 117017762 | C | A | -1.591 | 0.1115 | -? | 0    | 0     | 0 | 1        |
| rs2306471    | 11 | 117016450 | T | C | -1.591 | 0.1115 | -? | 0    | 0     | 0 | 1        |
| rs77171490   | 11 | 117038741 | A | T | -1.591 | 0.1115 | -? | 0    | 0     | 0 | 1        |
| rs77678768   | 11 | 117040505 | C | G | -1.591 | 0.1115 | -? | 0    | 0     | 0 | 1        |
| rs78166985   | 11 | 117029785 | T | A | -1.591 | 0.1115 | -? | 0    | 0     | 0 | 1        |
| rs80353869   | 11 | 117048122 | A | G | -1.591 | 0.1115 | -? | 0    | 0     | 0 | 1        |
| rs10892123   | 11 | 117354582 | C | T | 1.591  | 0.1116 | +? | 0    | 0     | 0 | 1        |
| rs17124211   | 11 | 120574350 | G | A | 1.591  | 0.1116 | +? | 0    | 0     | 0 | 1        |
| rs35962410   | 11 | 119831163 | C | A | -1.591 | 0.1116 | -? | 0    | 0     | 0 | 1        |
| rs636283     | 11 | 118932445 | T | C | -1.591 | 0.1116 | -? | 0    | 0     | 0 | 1        |
| rs17119815   | 11 | 116429563 | G | T | -1.589 | 0.112  | -? | 0    | 0     | 0 | 1        |
| rs2155466    | 11 | 121004502 | T | C | 1.589  | 0.112  | +? | 0    | 0     | 0 | 1        |
| rs612804     | 11 | 121077373 | C | T | 1.589  | 0.112  | +? | 0    | 0     | 0 | 1        |
| rs2089647    | 11 | 119512641 | G | A | 1.587  | 0.1124 | +? | 0    | 0     | 0 | 1        |
| rs74649894   | 11 | 118136362 | G | C | 1.587  | 0.1124 | +  | 62.8 | 8.065 | 1 | 0.004513 |
| rs651202     | 11 | 119881745 | A | G | 1.587  | 0.1125 | +? | 0    | 0     | 0 | 1        |
| rs10892148   | 11 | 117519147 | T | C | 1.587  | 0.1126 | +? | 0    | 0     | 0 | 1        |
| rs687180     | 11 | 121072293 | A | G | 1.587  | 0.1126 | +? | 0    | 0     | 0 | 1        |
| rs78341300   | 11 | 119483777 | G | A | -1.587 | 0.1126 | -? | 0    | 0     | 0 | 1        |
| rs1793170    | 11 | 118150205 | C | T | 1.586  | 0.1127 | +? | 0    | 0     | 0 | 1        |
| rs188758920  | 11 | 118858878 | A | C | -1.586 | 0.1128 | -? | 0    | 0     | 0 | 1        |
| rs2301174    | 11 | 117063709 | G | C | -1.585 | 0.1129 | -? | 0    | 0     | 0 | 1        |
| rs61901363   | 11 | 120569866 | T | C | 1.585  | 0.1129 | +? | 0    | 0     | 0 | 1        |
| rs4438048    | 11 | 119510366 | T | C | 1.585  | 0.113  | +? | 0    | 0     | 0 | 1        |
| rs616905     | 11 | 121076423 | C | T | 1.584  | 0.1131 | +? | 0    | 0     | 0 | 1        |
| rs140305819  | 11 | 118018518 | A | G | -1.584 | 0.1132 | -? | 0    | 0     | 0 | 1        |
| rs149137426  | 11 | 116682668 | A | T | 1.584  | 0.1132 | +? | 0    | 0     | 0 | 1        |
| rs1045334530 | 11 | 116301501 | C | A | 1.583  | 0.1134 | +? | 0    | 0     | 0 | 1        |
| rs10892639   | 11 | 120780402 | C | A | -1.582 | 0.1137 | -? | 0    | 0     | 0 | 1        |
| rs673768     | 11 | 118920453 | T | C | -1.582 | 0.1137 | -? | 0    | 0     | 0 | 1        |
| rs2089646    | 11 | 119512115 | G | A | 1.581  | 0.1138 | +? | 0    | 0     | 0 | 1        |
| rs61902686   | 11 | 120566375 | C | T | 1.581  | 0.1139 | +? | 0    | 0     | 0 | 1        |
| rs61902687   | 11 | 120566406 | G | A | 1.581  | 0.1139 | +? | 0    | 0     | 0 | 1        |
| rs4245199    | 11 | 119510303 | G | T | 1.58   | 0.1141 | +? | 0    | 0     | 0 | 1        |
| rs593319     | 11 | 119939806 | T | A | 1.58   | 0.1141 | +? | 0    | 0     | 0 | 1        |
| rs597253     | 11 | 119939156 | A | G | 1.58   | 0.1141 | +? | 0    | 0     | 0 | 1        |
| rs61901362   | 11 | 120569843 | C | T | 1.58   | 0.1142 | +? | 0    | 0     | 0 | 1        |
| rs11599950   | 11 | 117593368 | T | C | -1.579 | 0.1144 | -? | 0    | 0     | 0 | 1        |
| rs1316812    | 11 | 120491113 | T | C | -1.579 | 0.1144 | -? | 0    | 0     | 0 | 1        |
| rs114831648  | 11 | 117342536 | C | T | -1.578 | 0.1145 | -? | 0    | 0     | 0 | 1        |

|              |    |           |   |   |        |        |    |   |       |   |        |
|--------------|----|-----------|---|---|--------|--------|----|---|-------|---|--------|
| rs1715464    | 11 | 117987503 | A | C | -1.578 | 0.1145 | -- | 0 | 0.01  | 1 | 0.9195 |
| rs2509212    | 11 | 117214580 | G | C | -1.578 | 0.1146 | -? | 0 | 0     | 0 | 1      |
| rs12421186   | 11 | 120464049 | T | C | 1.577  | 0.1147 | +? | 0 | 0     | 0 | 1      |
| rs11216266   | 11 | 116950150 | C | T | -1.577 | 0.1148 | -? | 0 | 0     | 0 | 1      |
| rs4359220    | 11 | 120658874 | G | A | 1.577  | 0.1148 | +? | 0 | 0     | 0 | 1      |
| rs143494314  | 11 | 117023706 | T | C | -1.577 | 0.1149 | -? | 0 | 0     | 0 | 1      |
| rs150984554  | 11 | 117035016 | A | G | -1.577 | 0.1149 | -? | 0 | 0     | 0 | 1      |
| rs647975     | 11 | 118038741 | T | C | 1.577  | 0.1149 | +? | 0 | 0     | 0 | 1      |
| rs1001556897 | 11 | 117015238 | A | C | -1.576 | 0.115  | -? | 0 | 0     | 0 | 1      |
| rs34203183   | 11 | 120851138 | G | C | 1.576  | 0.115  | +? | 0 | 0     | 0 | 1      |
| rs7128009    | 11 | 120835281 | A | G | 1.576  | 0.115  | +? | 0 | 0     | 0 | 1      |
| rs11217661   | 11 | 119921007 | T | C | -1.576 | 0.1151 | -? | 0 | 0     | 0 | 1      |
| rs720313     | 11 | 119920110 | G | A | -1.576 | 0.1151 | -? | 0 | 0     | 0 | 1      |
| rs720314     | 11 | 119920056 | G | A | -1.576 | 0.1151 | -? | 0 | 0     | 0 | 1      |
| rs7933134    | 11 | 117059794 | C | G | -1.576 | 0.1151 | -? | 0 | 0     | 0 | 1      |
| rs11218060   | 11 | 120797878 | T | C | 1.574  | 0.1154 | +? | 0 | 0     | 0 | 1      |
| rs473172     | 11 | 116807970 | A | G | 1.574  | 0.1154 | +? | 0 | 0     | 0 | 1      |
| rs524209     | 11 | 120836662 | A | G | 1.574  | 0.1154 | +? | 0 | 0     | 0 | 1      |
| rs587985     | 11 | 119244095 | C | T | 1.574  | 0.1155 | +? | 0 | 0     | 0 | 1      |
| rs470324     | 11 | 118924212 | A | G | -1.574 | 0.1156 | -? | 0 | 0     | 0 | 1      |
| rs12274388   | 11 | 116946238 | T | C | -1.573 | 0.1158 | -? | 0 | 0     | 0 | 1      |
| rs2306472    | 11 | 117058062 | T | C | -1.573 | 0.1158 | -? | 0 | 0     | 0 | 1      |
| rs5072       | 11 | 116707583 | A | G | 1.573  | 0.1158 | +? | 0 | 0     | 0 | 1      |
| rs7109649    | 11 | 116943544 | T | C | -1.573 | 0.1158 | -? | 0 | 0     | 0 | 1      |
| rs7940667    | 11 | 119510644 | A | C | 1.573  | 0.1158 | +? | 0 | 0     | 0 | 1      |
| rs77998262   | 11 | 120419320 | A | G | 1.572  | 0.1159 | +? | 0 | 0     | 0 | 1      |
| rs87466      | 11 | 120981863 | G | A | -1.572 | 0.1159 | -? | 0 | 0     | 0 | 1      |
| rs640663     | 11 | 119936292 | A | G | 1.571  | 0.1161 | +? | 0 | 0     | 0 | 1      |
| rs1960536    | 11 | 119916341 | C | A | -1.571 | 0.1162 | -? | 0 | 0     | 0 | 1      |
| rs73009128   | 11 | 116333012 | T | C | 1.571  | 0.1162 | +? | 0 | 0     | 0 | 1      |
| rs12293509   | 11 | 120570595 | T | C | 1.57   | 0.1164 | +? | 0 | 0     | 0 | 1      |
| rs587308     | 11 | 119882789 | T | C | 1.57   | 0.1164 | +? | 0 | 0     | 0 | 1      |
| rs61904800   | 11 | 116424909 | A | G | -1.57  | 0.1164 | -? | 0 | 0     | 0 | 1      |
| rs2252494    | 11 | 120416923 | A | G | 1.569  | 0.1167 | +? | 0 | 0     | 0 | 1      |
| rs56221909   | 11 | 119679013 | C | G | 1.569  | 0.1167 | +? | 0 | 0     | 0 | 1      |
| rs11216240   | 11 | 116899248 | T | A | -1.568 | 0.1168 | -? | 0 | 0     | 0 | 1      |
| rs11216241   | 11 | 116899249 | C | A | -1.568 | 0.1168 | -? | 0 | 0     | 0 | 1      |
| rs10892066   | 11 | 116920927 | T | C | -1.568 | 0.1169 | -? | 0 | 0     | 0 | 1      |
| rs145723586  | 11 | 119728661 | T | C | 1.568  | 0.1169 | +? | 0 | 0     | 0 | 1      |
| rs1531706    | 11 | 116943952 | A | C | -1.568 | 0.1169 | -? | 0 | 0     | 0 | 1      |
| rs1531707    | 11 | 116944712 | A | G | -1.568 | 0.1169 | -? | 0 | 0     | 0 | 1      |
| rs7935913    | 11 | 116944348 | A | G | -1.568 | 0.1169 | -? | 0 | 0     | 0 | 1      |
| rs1876498    | 11 | 116464013 | A | G | -1.567 | 0.1171 | -? | 0 | 0     | 0 | 1      |
| rs7120429    | 11 | 116391651 | T | C | 1.567  | 0.1171 | +? | 0 | 0     | 0 | 1      |
| rs1338985819 | 11 | 117919431 | A | G | 1.567  | 0.1172 | +? | 0 | 0     | 0 | 1      |
| rs11217648   | 11 | 119904390 | G | A | -1.566 | 0.1173 | -? | 0 | 0     | 0 | 1      |
| rs582688     | 11 | 118932320 | C | T | -1.565 | 0.1175 | -? | 0 | 0     | 0 | 1      |
| rs2000527    | 11 | 120904156 | G | A | -1.564 | 0.1178 | -? | 0 | 0     | 0 | 1      |
| rs2046150    | 11 | 117053433 | A | C | -1.564 | 0.1178 | -? | 0 | 0     | 0 | 1      |
| rs12274465   | 11 | 116957189 | T | C | -1.564 | 0.1179 | -? | 0 | 0     | 0 | 1      |
| rs2298649    | 11 | 117672225 | G | A | 1.564  | 0.1179 | +? | 0 | 0     | 0 | 1      |
| rs3741279    | 11 | 117353003 | G | A | -1.564 | 0.1179 | -? | 0 | 0     | 0 | 1      |
| rs4938329    | 11 | 116928112 | T | C | -1.564 | 0.1179 | -? | 0 | 0     | 0 | 1      |
| rs7935834    | 11 | 116944437 | G | C | -1.564 | 0.1179 | -? | 0 | 0     | 0 | 1      |
| rs972534     | 11 | 119917892 | C | T | -1.564 | 0.1179 | -? | 0 | 0     | 0 | 1      |
| rs4938415    | 11 | 117467560 | A | C | -1.563 | 0.1181 | -- | 0 | 0.472 | 1 | 0.4922 |

|              |    |           |   |   |        |        |    |        |       |   |        |
|--------------|----|-----------|---|---|--------|--------|----|--------|-------|---|--------|
| rs10892518   | 11 | 119905145 | T | C | -1.562 | 0.1182 | -? | 0      | 0     | 0 | 1      |
| rs11217651   | 11 | 119905245 | C | T | -1.562 | 0.1183 | -? | 0      | 0     | 0 | 1      |
| rs180339     | 11 | 116617782 | T | C | -1.562 | 0.1183 | -- | 0      | 0.721 | 1 | 0.3958 |
| rs56763747   | 11 | 120493805 | G | A | -1.562 | 0.1183 | -? | 0      | 0     | 0 | 1      |
| rs11217654   | 11 | 119914725 | G | T | -1.562 | 0.1184 | -? | 0      | 0     | 0 | 1      |
| rs11607618   | 11 | 119911205 | A | G | -1.562 | 0.1184 | -? | 0      | 0     | 0 | 1      |
| rs12790374   | 11 | 119912882 | G | A | -1.562 | 0.1184 | -? | 0      | 0     | 0 | 1      |
| rs12792065   | 11 | 119912919 | C | T | -1.562 | 0.1184 | -? | 0      | 0     | 0 | 1      |
| rs12799875   | 11 | 119910275 | T | C | -1.562 | 0.1184 | -? | 0      | 0     | 0 | 1      |
| rs12800482   | 11 | 119910556 | T | C | -1.562 | 0.1184 | -? | 0      | 0     | 0 | 1      |
| rs12800844   | 11 | 119910592 | T | G | -1.562 | 0.1184 | -? | 0      | 0     | 0 | 1      |
| rs1452841    | 11 | 119909608 | G | A | -1.562 | 0.1184 | -? | 0      | 0     | 0 | 1      |
| rs61897925   | 11 | 119910833 | A | G | -1.562 | 0.1184 | -? | 0      | 0     | 0 | 1      |
| rs2008915    | 11 | 116603134 | C | G | -1.561 | 0.1185 | -- | 0      | 0.108 | 1 | 0.7424 |
| rs61901378   | 11 | 120577241 | A | G | 1.561  | 0.1186 | +? | 0      | 0     | 0 | 1      |
| rs538359     | 11 | 116281169 | C | T | 1.56   | 0.1187 | +? | 0      | 0     | 0 | 1      |
| rs569327     | 11 | 116317745 | T | C | 1.56   | 0.1187 | +? | 0      | 0     | 0 | 1      |
| rs61903416   | 11 | 116955049 | C | T | -1.559 | 0.1189 | -? | 0      | 0     | 0 | 1      |
| rs645233     | 11 | 119938788 | G | A | 1.559  | 0.1189 | +? | 0      | 0     | 0 | 1      |
| rs11512472   | 11 | 119917309 | G | A | -1.559 | 0.119  | -? | 0      | 0     | 0 | 1      |
| rs4938630    | 11 | 118984287 | A | C | 1.559  | 0.119  | +? | 0      | 0     | 0 | 1      |
| rs11217650   | 11 | 119905180 | T | G | -1.559 | 0.1191 | -? | 0      | 0     | 0 | 1      |
| rs12279066   | 11 | 116913909 | G | C | -1.558 | 0.1192 | -? | 0      | 0     | 0 | 1      |
| rs1010260    | 11 | 119925422 | A | G | -1.557 | 0.1194 | -? | 0      | 0     | 0 | 1      |
| rs66921644   | 11 | 119835014 | A | G | -1.557 | 0.1194 | -? | 0      | 0     | 0 | 1      |
| rs10790147   | 11 | 116411836 | T | C | -1.556 | 0.1198 | -? | 0      | 0     | 0 | 1      |
| rs28737445   | 11 | 120710210 | G | A | 1.556  | 0.1198 | +? | 0      | 0     | 0 | 1      |
| rs7106662    | 11 | 116951385 | C | T | -1.556 | 0.1198 | -? | 0      | 0     | 0 | 1      |
| rs80030349   | 11 | 119804640 | G | A | -1.555 | 0.1199 | -? | 0      | 0     | 0 | 1      |
| rs61900926   | 11 | 120492000 | A | G | -1.555 | 0.12   | -? | 0      | 0     | 0 | 1      |
| rs10466590   | 11 | 116894413 | G | C | -1.554 | 0.1201 | -? | 0      | 0     | 0 | 1      |
| rs11216239   | 11 | 116895512 | G | C | -1.554 | 0.1201 | -? | 0      | 0     | 0 | 1      |
| rs7484045    | 11 | 116946890 | T | C | -1.554 | 0.1201 | -? | 0      | 0     | 0 | 1      |
| rs11493812   | 11 | 119915782 | G | A | -1.554 | 0.1202 | -? | 0      | 0     | 0 | 1      |
| rs2510639    | 11 | 120875383 | A | G | 1.554  | 0.1202 | +? | 0      | 0     | 0 | 1      |
| rs11216244   | 11 | 116912730 | T | C | -1.554 | 0.1203 | -? | 0      | 0     | 0 | 1      |
| rs11216245   | 11 | 116913202 | T | C | -1.554 | 0.1203 | -? | 0      | 0     | 0 | 1      |
| rs78312641   | 11 | 118749318 | A | T | -1.553 | 0.1204 | +  | -126.3 | 1.326 | 1 | 0.2496 |
| rs12274778   | 11 | 120479903 | G | C | -1.553 | 0.1205 | -? | 0      | 0     | 0 | 1      |
| rs7102557    | 11 | 117745018 | A | G | 1.553  | 0.1205 | +? | 0      | 0     | 0 | 1      |
| rs7123784    | 11 | 117275887 | C | G | 1.552  | 0.1206 | +? | 0      | 0     | 0 | 1      |
| rs1379188468 | 11 | 120492853 | T | A | -1.551 | 0.1208 | -? | 0      | 0     | 0 | 1      |
| rs148945243  | 11 | 116601062 | T | C | -1.551 | 0.1208 | -? | 0      | 0     | 0 | 1      |
| rs658494     | 11 | 120984681 | T | C | -1.551 | 0.1209 | -? | 0      | 0     | 0 | 1      |
| rs73009129   | 11 | 116333791 | A | G | 1.551  | 0.1209 | +? | 0      | 0     | 0 | 1      |
| rs1567375    | 11 | 119502477 | A | C | -1.551 | 0.121  | -? | 0      | 0     | 0 | 1      |
| rs4938377    | 11 | 117296292 | G | T | 1.551  | 0.121  | +? | 0      | 0     | 0 | 1      |
| rs662146     | 11 | 119927792 | G | A | -1.551 | 0.121  | -? | 0      | 0     | 0 | 1      |
| rs7109567    | 11 | 117403017 | G | A | 1.551  | 0.121  | +? | 0      | 0     | 0 | 1      |
| rs10082609   | 11 | 116949074 | T | C | -1.55  | 0.1211 | -? | 0      | 0     | 0 | 1      |
| rs61901368   | 11 | 120571553 | G | A | 1.55   | 0.1211 | +? | 0      | 0     | 0 | 1      |
| rs591596     | 11 | 119938994 | A | G | 1.55   | 0.1212 | +? | 0      | 0     | 0 | 1      |
| rs11600552   | 11 | 116900947 | C | T | -1.549 | 0.1214 | -? | 0      | 0     | 0 | 1      |
| rs7128772    | 11 | 116889411 | A | T | -1.549 | 0.1214 | -? | 0      | 0     | 0 | 1      |
| rs10892330   | 11 | 118970875 | T | C | 1.549  | 0.1215 | +? | 0      | 0     | 0 | 1      |
| rs61901370   | 11 | 120571883 | T | C | 1.547  | 0.1218 | +? | 0      | 0     | 0 | 1      |

|              |    |           |   |   |        |        |    |        |       |   |        |
|--------------|----|-----------|---|---|--------|--------|----|--------|-------|---|--------|
| rs639891     | 11 | 121094594 | T | C | 1.547  | 0.1219 | +? | 0      | 0     | 0 | 1      |
| rs7123583    | 11 | 116600021 | T | C | -1.547 | 0.1219 | -- | 0      | 0.28  | 1 | 0.5966 |
| rs10891998   | 11 | 116465292 | G | A | -1.546 | 0.122  | -? | 0      | 0     | 0 | 1      |
| rs1410186916 | 11 | 117674072 | T | A | 1.546  | 0.122  | +? | 0      | 0     | 0 | 1      |
| rs10892070   | 11 | 116951533 | A | G | 1.546  | 0.1221 | +? | 0      | 0     | 0 | 1      |
| rs7115603    | 11 | 119781153 | G | A | -1.546 | 0.1221 | -? | 0      | 0     | 0 | 1      |
| rs78915622   | 11 | 117498834 | G | A | -1.545 | 0.1224 | -? | 0      | 0     | 0 | 1      |
| rs10892310   | 11 | 118806897 | T | C | 1.544  | 0.1225 | ++ | -133.6 | 1.284 | 1 | 0.2571 |
| rs10892071   | 11 | 116954565 | T | C | -1.544 | 0.1226 | -? | 0      | 0     | 0 | 1      |
| rs10892524   | 11 | 119927321 | T | G | -1.544 | 0.1226 | -? | 0      | 0     | 0 | 1      |
| rs1939331    | 11 | 119907867 | C | G | -1.544 | 0.1226 | -? | 0      | 0     | 0 | 1      |
| rs1452840    | 11 | 119906398 | T | A | -1.543 | 0.1228 | -? | 0      | 0     | 0 | 1      |
| rs112872285  | 11 | 117668060 | T | G | 1.543  | 0.1229 | +? | 0      | 0     | 0 | 1      |
| rs1467050    | 11 | 119529365 | T | C | 1.543  | 0.1229 | +? | 0      | 0     | 0 | 1      |
| rs11216255   | 11 | 116929995 | G | A | -1.542 | 0.1231 | -? | 0      | 0     | 0 | 1      |
| rs478626     | 11 | 121088829 | A | G | 1.542  | 0.1231 | +? | 0      | 0     | 0 | 1      |
| rs637115     | 11 | 121088659 | A | G | 1.542  | 0.1231 | +? | 0      | 0     | 0 | 1      |
| rs3824976    | 11 | 120895352 | A | G | -1.541 | 0.1232 | -? | 0      | 0     | 0 | 1      |
| rs7117266    | 11 | 118838020 | A | G | -1.541 | 0.1232 | -? | 0      | 0     | 0 | 1      |
| rs74945140   | 11 | 120991571 | A | G | -1.541 | 0.1232 | -? | 0      | 0     | 0 | 1      |
| rs12273351   | 11 | 119503402 | T | G | -1.54  | 0.1236 | -? | 0      | 0     | 0 | 1      |
| rs3886960    | 11 | 116924990 | T | G | -1.54  | 0.1236 | -? | 0      | 0     | 0 | 1      |
| rs606727     | 11 | 117356858 | G | C | 1.54   | 0.1236 | +? | 0      | 0     | 0 | 1      |
| rs7108912    | 11 | 116925996 | A | G | -1.54  | 0.1236 | -? | 0      | 0     | 0 | 1      |
| rs7124872    | 11 | 116927951 | G | A | -1.54  | 0.1236 | -? | 0      | 0     | 0 | 1      |
| rs7124996    | 11 | 116928006 | T | C | -1.54  | 0.1236 | -? | 0      | 0     | 0 | 1      |
| rs723955     | 11 | 116925042 | A | G | -1.54  | 0.1236 | -? | 0      | 0     | 0 | 1      |
| rs116057214  | 11 | 119495219 | G | A | -1.539 | 0.1237 | -? | 0      | 0     | 0 | 1      |
| rs519942     | 11 | 118921306 | A | G | -1.539 | 0.1237 | -? | 0      | 0     | 0 | 1      |
| rs675783     | 11 | 119927844 | C | T | -1.539 | 0.1237 | -? | 0      | 0     | 0 | 1      |
| rs4938699    | 11 | 119510937 | C | G | 1.539  | 0.1238 | +? | 0      | 0     | 0 | 1      |
| rs61905347   | 11 | 117646968 | T | C | -1.539 | 0.1238 | -? | 0      | 0     | 0 | 1      |
| rs34100096   | 11 | 116585625 | A | G | 1.539  | 0.1239 | +? | 0      | 0     | 0 | 1      |
| rs11217655   | 11 | 119914788 | C | A | -1.538 | 0.124  | -? | 0      | 0     | 0 | 1      |
| rs74447718   | 11 | 120571314 | T | C | 1.538  | 0.124  | +? | 0      | 0     | 0 | 1      |
| rs11822344   | 11 | 118864777 | C | G | -1.538 | 0.1241 | -? | 0      | 0     | 0 | 1      |
| rs7106316    | 11 | 118441079 | G | A | 1.538  | 0.1241 | ++ | 0      | 0.163 | 1 | 0.6866 |
| rs7950093    | 11 | 116963519 | T | G | -1.538 | 0.1241 | -? | 0      | 0     | 0 | 1      |
| rs2508573    | 11 | 118555383 | T | C | 1.537  | 0.1242 | ++ | 0      | 0.405 | 1 | 0.5243 |
| rs648191     | 11 | 121088794 | A | G | 1.537  | 0.1242 | +? | 0      | 0     | 0 | 1      |
| rs12270261   | 11 | 120577413 | T | C | 1.537  | 0.1243 | +? | 0      | 0     | 0 | 1      |
| rs11216620   | 11 | 117790342 | T | C | 1.537  | 0.1244 | +? | 0      | 0     | 0 | 1      |
| rs492047     | 11 | 121058954 | A | G | 1.536  | 0.1245 | +? | 0      | 0     | 0 | 1      |
| rs670192     | 11 | 118920112 | A | G | -1.536 | 0.1245 | -? | 0      | 0     | 0 | 1      |
| rs12363889   | 11 | 119918352 | G | A | -1.536 | 0.1246 | -? | 0      | 0     | 0 | 1      |
| rs67389832   | 11 | 118839032 | A | C | -1.535 | 0.1248 | -? | 0      | 0     | 0 | 1      |
| rs10502234   | 11 | 119906313 | A | G | -1.535 | 0.1249 | -? | 0      | 0     | 0 | 1      |
| rs11605106   | 11 | 119906213 | A | G | -1.535 | 0.1249 | -? | 0      | 0     | 0 | 1      |
| rs1235340366 | 11 | 119905840 | G | C | -1.535 | 0.1249 | -? | 0      | 0     | 0 | 1      |
| rs12362929   | 11 | 119905865 | G | A | -1.535 | 0.1249 | -? | 0      | 0     | 0 | 1      |
| rs61900898   | 11 | 120421474 | T | G | 1.534  | 0.125  | +? | 0      | 0     | 0 | 1      |
| rs4938704    | 11 | 119539313 | T | C | 1.532  | 0.1255 | +? | 0      | 0     | 0 | 1      |
| rs12278795   | 11 | 120570198 | G | A | 1.531  | 0.1258 | +? | 0      | 0     | 0 | 1      |
| rs61901364   | 11 | 120569884 | T | C | 1.531  | 0.1258 | +? | 0      | 0     | 0 | 1      |
| rs10892643   | 11 | 120790963 | T | C | 1.53   | 0.1259 | +? | 0      | 0     | 0 | 1      |
| rs17311045   | 11 | 117647496 | T | C | -1.53  | 0.1259 | -? | 0      | 0     | 0 | 1      |

|              |    |           |   |   |        |        |    |       |       |   |        |
|--------------|----|-----------|---|---|--------|--------|----|-------|-------|---|--------|
| rs11606672   | 11 | 117056059 | T | C | -1.53  | 0.126  | -? | 0     | 0     | 0 | 1      |
| rs675331     | 11 | 119927944 | G | A | -1.53  | 0.126  | -? | 0     | 0     | 0 | 1      |
| rs12418126   | 11 | 117336961 | G | A | 1.529  | 0.1262 | +  | 0     | 0     | 0 | 1      |
| rs11215936   | 11 | 116313516 | A | G | 1.529  | 0.1263 | +  | 0     | 0     | 0 | 1      |
| rs1203387394 | 11 | 117957631 | C | G | -1.529 | 0.1263 | -? | 0     | 0     | 0 | 1      |
| rs7951761    | 11 | 116467853 | G | A | -1.528 | 0.1264 | -? | 0     | 0     | 0 | 1      |
| rs11217366   | 11 | 119502599 | T | C | -1.527 | 0.1267 | -? | 0     | 0     | 0 | 1      |
| rs113419013  | 11 | 116870420 | T | C | -1.527 | 0.1268 | -? | 0     | 0     | 0 | 1      |
| rs514112     | 11 | 116330610 | G | A | -1.526 | 0.127  | -? | 0     | 0     | 0 | 1      |
| rs675873     | 11 | 119246708 | C | T | 1.526  | 0.127  | +  | 0     | 0     | 0 | 1      |
| rs918144     | 11 | 116633825 | T | C | -1.526 | 0.127  | +  | 0     | 0.829 | 1 | 0.3627 |
| rs61588877   | 11 | 120792086 | G | A | -1.526 | 0.1271 | -? | 0     | 0     | 0 | 1      |
| rs118056960  | 11 | 120568248 | T | C | 1.525  | 0.1273 | +  | 0     | 0     | 0 | 1      |
| rs12288261   | 11 | 120568153 | T | C | 1.525  | 0.1273 | +  | 0     | 0     | 0 | 1      |
| rs12295200   | 11 | 120568090 | C | T | 1.525  | 0.1273 | +  | 0     | 0     | 0 | 1      |
| rs61901360   | 11 | 120568790 | T | C | 1.525  | 0.1273 | +  | 0     | 0     | 0 | 1      |
| rs78634274   | 11 | 120568318 | C | T | 1.525  | 0.1273 | +  | 0     | 0     | 0 | 1      |
| rs12291927   | 11 | 120570080 | G | C | 1.524  | 0.1274 | +  | 0     | 0     | 0 | 1      |
| rs10892468   | 11 | 119676471 | T | G | 1.523  | 0.1277 | ++ | 0     | 0.147 | 1 | 0.7017 |
| rs12293393   | 11 | 120570404 | G | C | 1.523  | 0.1277 | +  | 0     | 0     | 0 | 1      |
| rs11600946   | 11 | 120420262 | A | G | 1.522  | 0.1279 | +  | 0     | 0     | 0 | 1      |
| rs557501     | 11 | 120851221 | C | G | 1.522  | 0.1279 | +  | 0     | 0     | 0 | 1      |
| rs71480323   | 11 | 116771600 | A | G | -1.522 | 0.1279 | -? | 0     | 0     | 0 | 1      |
| rs76365645   | 11 | 119499578 | A | G | -1.522 | 0.1279 | -? | 0     | 0     | 0 | 1      |
| rs57550545   | 11 | 117560679 | C | T | 1.521  | 0.1282 | +  | 0     | 0     | 0 | 1      |
| rs627999     | 11 | 117992155 | T | C | -1.52  | 0.1285 | -? | 0     | 0     | 0 | 1      |
| rs1941410    | 11 | 120171165 | A | G | -1.52  | 0.1286 | -? | 0     | 0     | 0 | 1      |
| rs3087563    | 11 | 117707937 | C | T | -1.519 | 0.1288 | -? | 0     | 0     | 0 | 1      |
| rs568922     | 11 | 118919206 | T | C | -1.519 | 0.1288 | -? | 0     | 0     | 0 | 1      |
| rs601102     | 11 | 121057021 | C | T | 1.519  | 0.1288 | +  | 0     | 0     | 0 | 1      |
| rs61901361   | 11 | 120569355 | G | A | 1.519  | 0.1288 | +  | 0     | 0     | 0 | 1      |
| rs553637     | 11 | 117461602 | C | T | 1.518  | 0.1289 | +  | 0     | 0     | 0 | 1      |
| rs10892174   | 11 | 117672565 | C | A | 1.518  | 0.1291 | +  | 0     | 0     | 0 | 1      |
| rs588209     | 11 | 121081509 | G | C | 1.518  | 0.1291 | +  | 0     | 0     | 0 | 1      |
| rs592565     | 11 | 119939927 | A | G | 1.518  | 0.1291 | +  | 0     | 0     | 0 | 1      |
| rs7110845    | 11 | 120175749 | A | G | -1.518 | 0.1291 | -? | 0     | 0     | 0 | 1      |
| rs609272     | 11 | 117201682 | T | C | -1.517 | 0.1292 | -? | 0     | 0     | 0 | 1      |
| rs17245580   | 11 | 120480883 | G | A | -1.517 | 0.1293 | -? | 0     | 0     | 0 | 1      |
| rs947891     | 11 | 117944519 | T | C | 1.516  | 0.1295 | +- | -21.3 | 2.473 | 1 | 0.1158 |
| rs1989151    | 11 | 119926775 | A | T | -1.516 | 0.1296 | -? | 0     | 0     | 0 | 1      |
| rs1363950531 | 11 | 117461875 | G | T | 1.515  | 0.1298 | +  | 0     | 0     | 0 | 1      |
| rs481703     | 11 | 121055740 | C | T | 1.515  | 0.1298 | +  | 0     | 0     | 0 | 1      |
| rs11217556   | 11 | 119768054 | A | C | 1.514  | 0.1299 | +  | 0     | 0     | 0 | 1      |
| rs12576226   | 11 | 117464025 | G | A | 1.514  | 0.1299 | +  | 0     | 0     | 0 | 1      |
| rs2305828    | 11 | 117251143 | A | G | 1.514  | 0.1299 | +  | 0     | 0     | 0 | 1      |
| rs1893023    | 11 | 121004151 | T | C | 1.514  | 0.13   | +  | 0     | 0     | 0 | 1      |
| rs111954335  | 11 | 119797706 | T | C | -1.513 | 0.1302 | -? | 0     | 0     | 0 | 1      |
| rs112293704  | 11 | 119799826 | G | T | -1.513 | 0.1302 | -? | 0     | 0     | 0 | 1      |
| rs112297727  | 11 | 119797684 | T | C | -1.513 | 0.1302 | -? | 0     | 0     | 0 | 1      |
| rs74840179   | 11 | 119798592 | C | G | -1.513 | 0.1302 | -? | 0     | 0     | 0 | 1      |
| rs75417087   | 11 | 119801401 | T | G | -1.513 | 0.1302 | -? | 0     | 0     | 0 | 1      |
| rs754871     | 11 | 119802186 | G | A | -1.513 | 0.1302 | -? | 0     | 0     | 0 | 1      |
| rs75640250   | 11 | 119798205 | A | C | -1.513 | 0.1302 | -? | 0     | 0     | 0 | 1      |
| rs75748285   | 11 | 119798123 | C | T | -1.513 | 0.1302 | -? | 0     | 0     | 0 | 1      |
| rs76777718   | 11 | 119798178 | A | G | -1.513 | 0.1302 | -? | 0     | 0     | 0 | 1      |
| rs77109784   | 11 | 119797995 | G | A | -1.513 | 0.1302 | -? | 0     | 0     | 0 | 1      |

|             |    |           |   |   |        |        |    |       |       |   |        |
|-------------|----|-----------|---|---|--------|--------|----|-------|-------|---|--------|
| rs77400160  | 11 | 119799196 | T | C | -1.513 | 0.1302 | -? | 0     | 0     | 0 | 1      |
| rs78178500  | 11 | 119800547 | A | C | -1.513 | 0.1302 | -? | 0     | 0     | 0 | 1      |
| rs78763435  | 11 | 119801962 | A | T | -1.513 | 0.1302 | -? | 0     | 0     | 0 | 1      |
| rs79048103  | 11 | 119801279 | T | C | -1.513 | 0.1302 | -? | 0     | 0     | 0 | 1      |
| rs79592175  | 11 | 119801704 | C | G | -1.513 | 0.1302 | -? | 0     | 0     | 0 | 1      |
| rs80166158  | 11 | 119799219 | A | G | -1.513 | 0.1302 | -? | 0     | 0     | 0 | 1      |
| rs11216505  | 11 | 117563295 | A | G | 1.513  | 0.1303 | +  | 0     | 0     | 0 | 1      |
| rs1447149   | 11 | 119691069 | A | G | 1.512  | 0.1305 | +  | 0     | 0     | 0 | 1      |
| rs73010304  | 11 | 117391522 | A | G | -1.512 | 0.1306 | -? | 0     | 0     | 0 | 1      |
| rs78699173  | 11 | 119922708 | A | C | -1.512 | 0.1306 | -? | 0     | 0     | 0 | 1      |
| rs113685600 | 11 | 120899875 | G | C | 1.511  | 0.1307 | +  | 0     | 0     | 0 | 1      |
| rs11216466  | 11 | 117474580 | A | C | 1.511  | 0.1308 | +  | 0     | 0     | 0 | 1      |
| rs11828031  | 11 | 119679659 | A | G | 1.511  | 0.1308 | +  | 0     | 0     | 0 | 1      |
| rs58047799  | 11 | 120489586 | G | T | -1.511 | 0.1308 | -? | 0     | 0     | 0 | 1      |
| rs10750179  | 11 | 120864593 | A | G | 1.511  | 0.1309 | +  | 0     | 0     | 0 | 1      |
| rs73012582  | 11 | 117500448 | A | G | -1.511 | 0.1309 | -? | 0     | 0     | 0 | 1      |
| rs541948    | 11 | 116470344 | T | G | -1.51  | 0.131  | -? | 0     | 0     | 0 | 1      |
| rs61901366  | 11 | 120570786 | A | G | 1.51   | 0.131  | +  | 0     | 0     | 0 | 1      |
| rs2155365   | 11 | 121013174 | C | A | 1.51   | 0.1311 | +  | 0     | 0     | 0 | 1      |
| rs60969913  | 11 | 118798154 | C | G | 1.51   | 0.1311 | +  | -37.4 | 2.183 | 1 | 0.1395 |
| rs11217360  | 11 | 119498563 | T | C | -1.509 | 0.1312 | -? | 0     | 0     | 0 | 1      |
| rs11215937  | 11 | 116313601 | G | A | 1.508  | 0.1316 | +  | 0     | 0     | 0 | 1      |
| rs7130633   | 11 | 119636704 | A | C | 1.507  | 0.1317 | +  | 0     | 0     | 0 | 1      |
| rs983567    | 11 | 116783600 | C | T | -1.507 | 0.1317 | -? | 0     | 0     | 0 | 1      |
| rs12721090  | 11 | 116700775 | T | C | -1.507 | 0.1318 | -? | 0     | 0     | 0 | 1      |
| rs7950396   | 11 | 117501271 | A | G | -1.507 | 0.1318 | -? | 0     | 0     | 0 | 1      |
| rs3889571   | 11 | 117300067 | T | G | -1.505 | 0.1322 | -? | 0     | 0     | 0 | 1      |
| rs1944518   | 11 | 120843742 | T | C | -1.505 | 0.1323 | -? | 0     | 0     | 0 | 1      |
| rs7103685   | 11 | 119523181 | C | T | -1.505 | 0.1323 | -? | 0     | 0     | 0 | 1      |
| rs7940638   | 11 | 117297415 | A | C | 1.505  | 0.1323 | +  | 0     | 0     | 0 | 1      |
| rs61901367  | 11 | 120570901 | A | G | 1.505  | 0.1324 | +  | 0     | 0     | 0 | 1      |
| rs7123336   | 11 | 116782819 | C | T | -1.505 | 0.1324 | -? | 0     | 0     | 0 | 1      |
| rs56032119  | 11 | 118797544 | G | A | 1.504  | 0.1326 | +  | -38   | 2.174 | 1 | 0.1404 |
| rs7102603   | 11 | 120853675 | T | C | -1.504 | 0.1326 | -? | 0     | 0     | 0 | 1      |
| rs6589549   | 11 | 116364066 | A | G | 1.504  | 0.1327 | +  | 0     | 0     | 0 | 1      |
| rs12285200  | 11 | 117564891 | G | A | 1.503  | 0.1328 | +  | 0     | 0     | 0 | 1      |
| rs3016346   | 11 | 116486588 | A | G | 1.503  | 0.1328 | +  | 0     | 0     | 0 | 1      |
| rs603446    | 11 | 116654435 | T | C | 1.503  | 0.1328 | ++ | 0     | 0.005 | 1 | 0.9412 |
| rs77643000  | 11 | 118749563 | C | T | -1.503 | 0.1329 | +  | -129  | 1.31  | 1 | 0.2524 |
| rs7948548   | 11 | 116360293 | A | G | -1.503 | 0.1329 | -? | 0     | 0     | 0 | 1      |
| rs149505626 | 11 | 120571229 | A | G | 1.502  | 0.133  | +  | 0     | 0     | 0 | 1      |
| rs603455    | 11 | 117958429 | T | A | -1.502 | 0.133  | -? | 0     | 0     | 0 | 1      |
| rs11600436  | 11 | 120419868 | T | C | -1.5   | 0.1335 | -? | 0     | 0     | 0 | 1      |
| rs6589675   | 11 | 118569414 | C | G | 1.5    | 0.1335 | ++ | 0     | 0.604 | 1 | 0.4371 |
| rs111683933 | 11 | 116642049 | C | T | -1.5   | 0.1336 | -? | 0     | 0     | 0 | 1      |
| rs492257    | 11 | 116528249 | A | G | 1.5    | 0.1336 | +  | 0     | 0     | 0 | 1      |
| rs113876980 | 11 | 117667688 | A | C | 1.5    | 0.1337 | +  | 0     | 0     | 0 | 1      |
| rs11217913  | 11 | 120417553 | G | A | 1.499  | 0.1338 | +  | 0     | 0     | 0 | 1      |
| rs113271699 | 11 | 116650571 | A | C | -1.499 | 0.1339 | -? | 0     | 0     | 0 | 1      |
| rs4938440   | 11 | 117693971 | A | G | 1.498  | 0.1342 | +  | 0     | 0     | 0 | 1      |
| rs111390501 | 11 | 118797420 | G | A | 1.497  | 0.1344 | +  | -38.8 | 2.162 | 1 | 0.1415 |
| rs73575429  | 11 | 118797392 | C | T | 1.497  | 0.1344 | +  | -38.8 | 2.162 | 1 | 0.1415 |
| rs10047462  | 11 | 116722041 | G | T | 1.496  | 0.1346 | +  | 0     | 0     | 0 | 1      |
| rs10892162  | 11 | 117561265 | G | A | 1.496  | 0.1346 | +  | 0     | 0     | 0 | 1      |
| rs74584888  | 11 | 118797278 | A | G | 1.496  | 0.1347 | +  | -38.9 | 2.159 | 1 | 0.1417 |
| rs592160    | 11 | 121049136 | T | C | 1.495  | 0.1348 | +  | 0     | 0     | 0 | 1      |

|             |    |           |   |   |        |        |    |       |       |   |        |
|-------------|----|-----------|---|---|--------|--------|----|-------|-------|---|--------|
| rs61901369  | 11 | 120571702 | C | T | 1.495  | 0.1348 | +  | 0     | 0     | 0 | 1      |
| rs7125270   | 11 | 119682918 | T | C | 1.495  | 0.1349 | ++ | 0     | 0.218 | 1 | 0.6407 |
| rs4938305   | 11 | 116588629 | T | C | -1.495 | 0.135  | -- | 0     | 0.154 | 1 | 0.6951 |
| rs4409845   | 11 | 119582832 | G | A | 1.494  | 0.1353 | +  | 0     | 0     | 0 | 1      |
| rs10892175  | 11 | 117674355 | A | G | 1.492  | 0.1356 | +  | 0     | 0     | 0 | 1      |
| rs11217653  | 11 | 119913541 | A | G | -1.492 | 0.1356 | -  | 0     | 0     | 0 | 1      |
| rs680730    | 11 | 117475233 | T | C | -1.492 | 0.1356 | -  | 0     | 0     | 0 | 1      |
| rs4936569   | 11 | 120825635 | C | T | 1.492  | 0.1357 | +  | 0     | 0     | 0 | 1      |
| rs75736746  | 11 | 120790814 | G | A | -1.492 | 0.1357 | -  | 0     | 0     | 0 | 1      |
| rs2513094   | 11 | 116806412 | C | T | -1.492 | 0.1358 | -  | 0     | 0     | 0 | 1      |
| rs79533157  | 11 | 119922728 | C | G | -1.491 | 0.1359 | -  | 0     | 0     | 0 | 1      |
| rs620896    | 11 | 121050913 | G | A | 1.491  | 0.136  | +  | 0     | 0     | 0 | 1      |
| rs640332    | 11 | 121050748 | C | T | 1.491  | 0.136  | +  | 0     | 0     | 0 | 1      |
| rs73009445  | 11 | 118744615 | A | G | 1.491  | 0.1361 | +- | -77.2 | 1.693 | 1 | 0.1933 |
| rs7930264   | 11 | 116870766 | A | G | -1.49  | 0.1362 | -  | 0     | 0     | 0 | 1      |
| rs7120925   | 11 | 117912465 | T | C | -1.49  | 0.1363 | -  | 0     | 0     | 0 | 1      |
| rs61697909  | 11 | 117474845 | A | G | -1.489 | 0.1364 | -  | 0     | 0     | 0 | 1      |
| rs552657    | 11 | 116530209 | T | C | 1.489  | 0.1365 | +  | 0     | 0     | 0 | 1      |
| rs1893707   | 11 | 120999631 | C | A | 1.489  | 0.1366 | +  | 0     | 0     | 0 | 1      |
| rs12288712  | 11 | 117559219 | T | C | 1.487  | 0.1369 | +  | 0     | 0     | 0 | 1      |
| rs10790255  | 11 | 118515579 | G | T | -1.487 | 0.137  | -- | 0     | 0.152 | 1 | 0.697  |
| rs12272864  | 11 | 120564637 | C | T | 1.487  | 0.1371 | +  | 0     | 0     | 0 | 1      |
| rs552580    | 11 | 121031511 | G | A | 1.486  | 0.1372 | +  | 0     | 0     | 0 | 1      |
| rs677336    | 11 | 121030381 | T | A | 1.486  | 0.1372 | +  | 0     | 0     | 0 | 1      |
| rs552787    | 11 | 116530373 | C | A | 1.486  | 0.1374 | +  | 0     | 0     | 0 | 1      |
| rs11217077  | 11 | 118746223 | C | T | 1.485  | 0.1375 | ++ | 0     | 0.131 | 1 | 0.7172 |
| rs12802202  | 11 | 116677048 | C | T | 1.485  | 0.1375 | +  | 0     | 0     | 0 | 1      |
| rs61901376  | 11 | 120573725 | G | A | 1.484  | 0.1377 | +  | 0     | 0     | 0 | 1      |
| rs681454    | 11 | 119927648 | G | C | -1.484 | 0.1377 | -  | 0     | 0     | 0 | 1      |
| rs2269398   | 11 | 117069788 | T | C | -1.484 | 0.1378 | -  | 0     | 0     | 0 | 1      |
| rs73575428  | 11 | 118797003 | G | C | 1.484  | 0.1378 | +- | -40.2 | 2.14  | 1 | 0.1435 |
| rs509171    | 11 | 116848857 | T | C | -1.483 | 0.1382 | -  | 0     | 0     | 0 | 1      |
| rs1009365   | 11 | 119504952 | T | C | -1.482 | 0.1383 | -  | 0     | 0     | 0 | 1      |
| rs117512890 | 11 | 119592965 | C | T | 1.482  | 0.1383 | +  | 0     | 0     | 0 | 1      |
| rs562281    | 11 | 121039947 | T | A | 1.482  | 0.1383 | +  | 0     | 0     | 0 | 1      |
| rs682048    | 11 | 116828320 | G | T | -1.482 | 0.1383 | -  | 0     | 0     | 0 | 1      |
| rs34637368  | 11 | 116619605 | A | G | -1.482 | 0.1384 | -  | 0     | 0     | 0 | 1      |
| rs61904804  | 11 | 116432510 | C | G | -1.482 | 0.1384 | -  | 0     | 0     | 0 | 1      |
| rs715315    | 11 | 117656774 | T | C | -1.482 | 0.1384 | -  | 0     | 0     | 0 | 1      |
| rs688641    | 11 | 121030195 | T | G | 1.481  | 0.1385 | +  | 0     | 0     | 0 | 1      |
| rs662496    | 11 | 121033105 | G | A | 1.481  | 0.1386 | +  | 0     | 0     | 0 | 1      |
| rs1317814   | 11 | 120484810 | G | A | -1.48  | 0.1388 | -  | 0     | 0     | 0 | 1      |
| rs584355    | 11 | 121035186 | A | C | 1.48   | 0.1388 | +  | 0     | 0     | 0 | 1      |
| rs4375451   | 11 | 120497208 | T | C | -1.479 | 0.1392 | -  | 0     | 0     | 0 | 1      |
| rs480761    | 11 | 120986571 | A | G | -1.479 | 0.1392 | -  | 0     | 0     | 0 | 1      |
| rs59127761  | 11 | 120493714 | G | C | -1.478 | 0.1394 | -  | 0     | 0     | 0 | 1      |
| rs6589862   | 11 | 121098681 | A | G | 1.478  | 0.1395 | +  | 0     | 0     | 0 | 1      |
| rs676426    | 11 | 120871963 | A | G | 1.478  | 0.1395 | +  | 0     | 0     | 0 | 1      |
| rs11216930  | 11 | 118488782 | C | A | -1.477 | 0.1396 | -- | 0     | 0.183 | 1 | 0.6688 |
| rs588917    | 11 | 121013909 | T | G | 1.477  | 0.1397 | +  | 0     | 0     | 0 | 1      |
| rs2846109   | 11 | 120588100 | C | T | 1.477  | 0.1398 | +  | 0     | 0     | 0 | 1      |
| rs72996698  | 11 | 119886445 | T | C | -1.476 | 0.1399 | -  | 0     | 0     | 0 | 1      |
| rs1240768   | 11 | 116516653 | C | T | 1.476  | 0.14   | +  | 0     | 0     | 0 | 1      |
| rs140657166 | 11 | 119728423 | C | A | 1.476  | 0.14   | +  | 0     | 0     | 0 | 1      |
| rs11605327  | 11 | 116823062 | A | G | 1.475  | 0.1401 | +  | 0     | 0     | 0 | 1      |
| rs12792357  | 11 | 117666595 | C | T | -1.475 | 0.1402 | -  | 0     | 0     | 0 | 1      |

|             |    |           |   |   |        |        |    |   |       |   |        |
|-------------|----|-----------|---|---|--------|--------|----|---|-------|---|--------|
| rs4252314   | 11 | 117868517 | G | A | -1.475 | 0.1402 | -- | 0 | 0.002 | 1 | 0.9638 |
| rs60905351  | 11 | 116358593 | A | G | 1.475  | 0.1402 | +? | 0 | 0     | 0 | 1      |
| rs2170317   | 11 | 117070740 | C | A | -1.475 | 0.1403 | -? | 0 | 0     | 0 | 1      |
| rs7940044   | 11 | 117435148 | A | G | 1.475  | 0.1403 | +? | 0 | 0     | 0 | 1      |
| rs10750113  | 11 | 117632609 | G | A | 1.474  | 0.1404 | +? | 0 | 0     | 0 | 1      |
| rs10790205  | 11 | 117632645 | C | T | 1.474  | 0.1404 | +? | 0 | 0     | 0 | 1      |
| rs61904810  | 11 | 116436913 | T | C | -1.474 | 0.1404 | -? | 0 | 0     | 0 | 1      |
| rs6589583   | 11 | 116863766 | T | C | -1.474 | 0.1405 | -? | 0 | 0     | 0 | 1      |
| rs587443    | 11 | 117347400 | T | C | -1.474 | 0.1406 | -? | 0 | 0     | 0 | 1      |
| rs11216386  | 11 | 117309989 | T | C | -1.473 | 0.1407 | -? | 0 | 0     | 0 | 1      |
| rs60787798  | 11 | 120482493 | T | G | -1.473 | 0.1407 | -? | 0 | 0     | 0 | 1      |
| rs689264    | 11 | 117957258 | T | C | -1.472 | 0.1409 | -? | 0 | 0     | 0 | 1      |
| rs12279718  | 11 | 119503670 | A | C | -1.472 | 0.141  | -? | 0 | 0     | 0 | 1      |
| rs61901489  | 11 | 117741933 | C | G | 1.472  | 0.141  | +? | 0 | 0     | 0 | 1      |
| rs73002650  | 11 | 120492364 | G | A | -1.472 | 0.1411 | -? | 0 | 0     | 0 | 1      |
| rs76635827  | 11 | 120529153 | C | G | 1.471  | 0.1412 | +? | 0 | 0     | 0 | 1      |
| rs61905348  | 11 | 117647145 | T | G | -1.471 | 0.1414 | -? | 0 | 0     | 0 | 1      |
| rs72999492  | 11 | 118539746 | C | A | -1.471 | 0.1414 | -- | 0 | 0.056 | 1 | 0.8131 |
| rs4344529   | 11 | 117632375 | G | A | 1.469  | 0.1417 | +? | 0 | 0     | 0 | 1      |
| rs1621211   | 11 | 120873076 | A | G | 1.469  | 0.1418 | +? | 0 | 0     | 0 | 1      |
| rs12797352  | 11 | 119518006 | G | A | -1.468 | 0.142  | -? | 0 | 0     | 0 | 1      |
| rs4442562   | 11 | 118845813 | A | G | -1.468 | 0.142  | -? | 0 | 0     | 0 | 1      |
| rs61901399  | 11 | 120586773 | T | C | 1.468  | 0.142  | +? | 0 | 0     | 0 | 1      |
| rs112444974 | 11 | 117764401 | T | G | -1.468 | 0.1421 | -? | 0 | 0     | 0 | 1      |
| rs17121096  | 11 | 117569923 | C | T | 1.468  | 0.1421 | +? | 0 | 0     | 0 | 1      |
| rs71484168  | 11 | 120309460 | T | C | 1.467  | 0.1423 | +? | 0 | 0     | 0 | 1      |
| rs141116752 | 11 | 117541718 | T | C | 1.467  | 0.1424 | +? | 0 | 0     | 0 | 1      |
| rs73580434  | 11 | 116299637 | T | A | -1.467 | 0.1424 | -? | 0 | 0     | 0 | 1      |
| rs60668211  | 11 | 117502726 | A | G | -1.467 | 0.1425 | -? | 0 | 0     | 0 | 1      |
| rs7112573   | 11 | 117069023 | C | T | -1.467 | 0.1425 | -? | 0 | 0     | 0 | 1      |
| rs10790375  | 11 | 120174671 | C | T | -1.466 | 0.1426 | -? | 0 | 0     | 0 | 1      |
| rs10892163  | 11 | 117566303 | A | G | 1.466  | 0.1427 | +? | 0 | 0     | 0 | 1      |
| rs111259707 | 11 | 119540705 | C | T | 1.466  | 0.1427 | +? | 0 | 0     | 0 | 1      |
| rs492294    | 11 | 121014403 | G | A | 1.466  | 0.1427 | +? | 0 | 0     | 0 | 1      |
| rs11827682  | 11 | 116700785 | T | C | -1.465 | 0.1428 | -? | 0 | 0     | 0 | 1      |
| rs755791    | 11 | 117433686 | C | A | 1.465  | 0.1429 | +? | 0 | 0     | 0 | 1      |
| rs10790206  | 11 | 117632764 | C | T | 1.465  | 0.143  | +? | 0 | 0     | 0 | 1      |
| rs10790207  | 11 | 117632769 | C | T | 1.465  | 0.143  | +? | 0 | 0     | 0 | 1      |
| rs520868    | 11 | 121082988 | C | T | 1.465  | 0.143  | +? | 0 | 0     | 0 | 1      |
| rs475731    | 11 | 121004224 | T | C | -1.464 | 0.1433 | -? | 0 | 0     | 0 | 1      |
| rs73012879  | 11 | 117973145 | A | G | -1.464 | 0.1433 | -? | 0 | 0     | 0 | 1      |
| rs1240778   | 11 | 116536490 | C | A | -1.463 | 0.1435 | -? | 0 | 0     | 0 | 1      |
| rs1629083   | 11 | 118126576 | T | C | 1.463  | 0.1436 | +? | 0 | 0     | 0 | 1      |
| rs565296    | 11 | 119252151 | C | T | 1.462  | 0.1437 | ++ | 0 | 0.722 | 1 | 0.3955 |
| rs78204624  | 11 | 117883397 | C | G | -1.462 | 0.1438 | -? | 0 | 0     | 0 | 1      |
| rs11600156  | 11 | 116431149 | G | A | -1.461 | 0.1439 | -? | 0 | 0     | 0 | 1      |
| rs7350      | 11 | 118965048 | A | G | -1.461 | 0.1439 | -? | 0 | 0     | 0 | 1      |
| rs582876    | 11 | 121029720 | C | T | 1.461  | 0.144  | +? | 0 | 0     | 0 | 1      |
| rs11216506  | 11 | 117564052 | G | A | 1.46   | 0.1442 | +? | 0 | 0     | 0 | 1      |
| rs2239009   | 11 | 117089722 | C | G | -1.46  | 0.1443 | -? | 0 | 0     | 0 | 1      |
| rs4558175   | 11 | 118872581 | A | G | -1.46  | 0.1444 | -- | 0 | 0.058 | 1 | 0.8101 |
| rs656439    | 11 | 119250874 | C | T | 1.459  | 0.1446 | ++ | 0 | 0.54  | 1 | 0.4625 |
| rs10502221  | 11 | 116826870 | T | C | 1.459  | 0.1447 | +? | 0 | 0     | 0 | 1      |
| rs180371    | 11 | 116592203 | G | A | -1.458 | 0.1449 | -- | 0 | 0.094 | 1 | 0.7587 |
| rs633985    | 11 | 117460030 | G | C | 1.457  | 0.1452 | +? | 0 | 0     | 0 | 1      |
| rs73002644  | 11 | 120488117 | G | C | -1.457 | 0.1452 | -? | 0 | 0     | 0 | 1      |

|              |    |           |   |   |        |        |    |        |       |   |        |
|--------------|----|-----------|---|---|--------|--------|----|--------|-------|---|--------|
| rs2513097    | 11 | 116836212 | G | A | -1.456 | 0.1454 | -? | 0      | 0     | 0 | 1      |
| rs34913450   | 11 | 118020130 | C | T | 1.456  | 0.1455 | +  | 0      | 0     | 0 | 1      |
| rs76014645   | 11 | 117795717 | A | C | 1.456  | 0.1455 | +  | 0      | 0     | 0 | 1      |
| rs4936386    | 11 | 117430750 | T | C | 1.455  | 0.1456 | +  | 0      | 0     | 0 | 1      |
| rs560564     | 11 | 117195628 | C | A | 1.454  | 0.1459 | +  | 0      | 0     | 0 | 1      |
| rs75336872   | 11 | 117793169 | T | C | 1.454  | 0.1459 | +  | 0      | 0     | 0 | 1      |
| rs35314805   | 11 | 117463914 | C | T | 1.453  | 0.1461 | +  | 0      | 0     | 0 | 1      |
| rs6589834    | 11 | 120583174 | C | G | 1.452  | 0.1464 | +  | 0      | 0     | 0 | 1      |
| rs693192     | 11 | 116355678 | A | G | -1.452 | 0.1464 | -? | 0      | 0     | 0 | 1      |
| rs2239678    | 11 | 117070596 | T | C | -1.452 | 0.1465 | -? | 0      | 0     | 0 | 1      |
| rs2269399    | 11 | 117066353 | C | G | -1.452 | 0.1465 | -? | 0      | 0     | 0 | 1      |
| rs599894     | 11 | 121017741 | C | G | 1.452  | 0.1465 | +  | 0      | 0     | 0 | 1      |
| rs520328     | 11 | 117329415 | A | G | 1.451  | 0.1467 | +  | 0      | 0     | 0 | 1      |
| rs636575     | 11 | 120988600 | C | A | -1.451 | 0.1467 | -? | 0      | 0     | 0 | 1      |
| rs7108971    | 11 | 121106570 | A | T | 1.451  | 0.1468 | +  | 0      | 0     | 0 | 1      |
| rs78628783   | 11 | 117092051 | T | C | -1.451 | 0.1468 | -? | 0      | 0     | 0 | 1      |
| rs11216315   | 11 | 117080640 | G | C | -1.451 | 0.1469 | -? | 0      | 0     | 0 | 1      |
| rs11217068   | 11 | 118729283 | T | C | -1.451 | 0.1469 | -- | 0      | 0.057 | 1 | 0.811  |
| rs45499491   | 11 | 117965421 | T | C | -1.45  | 0.1471 | -? | 0      | 0     | 0 | 1      |
| rs512608     | 11 | 119253797 | G | A | 1.449  | 0.1472 | ++ | 0      | 0.705 | 1 | 0.4013 |
| rs1893394    | 11 | 119881526 | A | G | 1.449  | 0.1473 | +  | 0      | 0     | 0 | 1      |
| rs4935744    | 11 | 120496704 | G | T | -1.449 | 0.1473 | -? | 0      | 0     | 0 | 1      |
| rs61901377   | 11 | 120574079 | G | A | 1.448  | 0.1475 | +  | 0      | 0     | 0 | 1      |
| rs11217361   | 11 | 119499255 | C | G | -1.448 | 0.1476 | -? | 0      | 0     | 0 | 1      |
| rs34836631   | 11 | 117681047 | A | G | 1.448  | 0.1476 | +  | 0      | 0     | 0 | 1      |
| rs2010473    | 11 | 117433739 | C | T | 1.448  | 0.1477 | +  | 0      | 0     | 0 | 1      |
| rs117165966  | 11 | 120572772 | C | G | 1.447  | 0.1478 | +  | 0      | 0     | 0 | 1      |
| rs142600127  | 11 | 120572814 | A | G | 1.447  | 0.1478 | +  | 0      | 0     | 0 | 1      |
| rs1789403    | 11 | 116516506 | C | T | 1.447  | 0.1478 | +  | 0      | 0     | 0 | 1      |
| rs510722     | 11 | 121040370 | A | T | 1.447  | 0.1478 | +  | 0      | 0     | 0 | 1      |
| rs12280641   | 11 | 120989762 | A | G | 1.447  | 0.148  | +  | 0      | 0     | 0 | 1      |
| rs12421706   | 11 | 117403727 | T | C | 1.446  | 0.1481 | +  | 0      | 0     | 0 | 1      |
| rs626776     | 11 | 119028813 | C | G | -1.446 | 0.1481 | -? | 0      | 0     | 0 | 1      |
| rs7947185    | 11 | 118214726 | C | T | 1.446  | 0.1481 | +  | 0      | 0     | 0 | 1      |
| rs531184     | 11 | 117112526 | T | G | 1.446  | 0.1482 | +  | 0      | 0     | 0 | 1      |
| rs10892320   | 11 | 118873385 | T | C | -1.446 | 0.1483 | -- | 0      | 0.057 | 1 | 0.8109 |
| rs10892629   | 11 | 120716019 | T | C | 1.446  | 0.1483 | +  | 0      | 0     | 0 | 1      |
| rs7120237    | 11 | 120161995 | C | T | -1.444 | 0.1486 | -? | 0      | 0     | 0 | 1      |
| rs12418722   | 11 | 117320430 | T | C | 1.444  | 0.1488 | +  | 0      | 0     | 0 | 1      |
| rs11218079   | 11 | 120825043 | T | C | -1.443 | 0.149  | -? | 0      | 0     | 0 | 1      |
| rs1289103681 | 11 | 116414488 | C | T | -1.443 | 0.149  | -? | 0      | 0     | 0 | 1      |
| rs11217524   | 11 | 119692871 | C | T | 1.443  | 0.1491 | +  | 0      | 0     | 0 | 1      |
| rs11824545   | 11 | 117646692 | T | G | -1.442 | 0.1493 | -? | 0      | 0     | 0 | 1      |
| rs2855068    | 11 | 118954805 | T | C | -1.442 | 0.1493 | -? | 0      | 0     | 0 | 1      |
| rs600638     | 11 | 117957750 | T | C | -1.442 | 0.1493 | -? | 0      | 0     | 0 | 1      |
| rs80351364   | 11 | 117092394 | T | A | -1.442 | 0.1494 | -? | 0      | 0     | 0 | 1      |
| rs78566287   | 11 | 120412053 | T | C | 1.441  | 0.1495 | +  | 0      | 0     | 0 | 1      |
| rs180378     | 11 | 116588909 | A | G | -1.44  | 0.1498 | -+ | -190.6 | 1.032 | 1 | 0.3096 |
| rs61901372   | 11 | 120572387 | C | T | 1.44   | 0.1498 | +  | 0      | 0     | 0 | 1      |
| rs61901374   | 11 | 120572952 | C | T | 1.44   | 0.1498 | +  | 0      | 0     | 0 | 1      |
| rs61901375   | 11 | 120573265 | C | T | 1.44   | 0.1498 | +  | 0      | 0     | 0 | 1      |
| rs7124184    | 11 | 117655063 | T | C | 1.44   | 0.1498 | +  | 0      | 0     | 0 | 1      |
| rs78201038   | 11 | 119499316 | G | C | -1.44  | 0.1498 | -? | 0      | 0     | 0 | 1      |
| rs11216507   | 11 | 117565069 | C | T | 1.44   | 0.1499 | +  | 0      | 0     | 0 | 1      |
| rs1941635    | 11 | 117982495 | T | G | -1.44  | 0.15   | -? | 0      | 0     | 0 | 1      |
| rs527878     | 11 | 119793024 | G | A | 1.44   | 0.15   | +  | 0      | 0     | 0 | 1      |

|              |    |           |   |   |        |        |    |       |       |   |         |
|--------------|----|-----------|---|---|--------|--------|----|-------|-------|---|---------|
| rs12295113   | 11 | 120577100 | T | C | 1.438  | 0.1503 | +  | 0     | 0     | 0 | 1       |
| rs79669568   | 11 | 117795611 | C | T | 1.438  | 0.1503 | +  | 0     | 0     | 0 | 1       |
| rs12277355   | 11 | 118729442 | T | C | -1.438 | 0.1504 | -- | 0     | 0.029 | 1 | 0.8638  |
| rs658654     | 11 | 119248320 | C | T | 1.438  | 0.1504 | ++ | 0     | 0.832 | 1 | 0.3617  |
| rs516226     | 11 | 116519655 | T | C | 1.438  | 0.1505 | +  | 0     | 0     | 0 | 1       |
| rs45540840   | 11 | 118486110 | A | G | -1.437 | 0.1507 | -- | 0     | 0.192 | 1 | 0.6613  |
| rs79892107   | 11 | 116306324 | T | C | -1.436 | 0.1509 | -? | 0     | 0     | 0 | 1       |
| rs113650932  | 11 | 117766665 | T | C | -1.435 | 0.1513 | -? | 0     | 0     | 0 | 1       |
| rs670906     | 11 | 119252199 | T | G | 1.435  | 0.1513 | ++ | 0     | 0.56  | 1 | 0.4543  |
| rs74385934   | 11 | 117068444 | A | G | -1.435 | 0.1514 | -? | 0     | 0     | 0 | 1       |
| rs1317815    | 11 | 120484712 | A | G | -1.434 | 0.1515 | -? | 0     | 0     | 0 | 1       |
| rs1892902    | 11 | 117669794 | T | G | -1.434 | 0.1517 | -? | 0     | 0     | 0 | 1       |
| rs628269     | 11 | 117926735 | G | A | -1.434 | 0.1517 | -? | 0     | 0     | 0 | 1       |
| rs7122817    | 11 | 117657679 | A | G | -1.434 | 0.1517 | -? | 0     | 0     | 0 | 1       |
| rs1729409    | 11 | 116673768 | A | G | -1.433 | 0.1518 | -- | 0     | 0.456 | 1 | 0.4996  |
| rs7102128    | 11 | 120505235 | A | G | 1.433  | 0.1519 | +  | 0     | 0     | 0 | 1       |
| rs61901371   | 11 | 120572361 | A | G | 1.433  | 0.152  | +  | 0     | 0     | 0 | 1       |
| rs6589805    | 11 | 120161671 | C | T | -1.433 | 0.152  | -? | 0     | 0     | 0 | 1       |
| rs2848729    | 11 | 119881097 | T | C | 1.432  | 0.1521 | +  | 0     | 0     | 0 | 1       |
| rs34163098   | 11 | 119509118 | A | G | -1.432 | 0.1521 | -? | 0     | 0     | 0 | 1       |
| rs488766     | 11 | 120990239 | G | A | -1.432 | 0.1522 | -? | 0     | 0     | 0 | 1       |
| rs55945170   | 11 | 117572395 | G | A | 1.431  | 0.1524 | +  | 0     | 0     | 0 | 1       |
| rs633770     | 11 | 121003606 | T | G | -1.431 | 0.1524 | -? | 0     | 0     | 0 | 1       |
| rs10750184   | 11 | 121160481 | A | G | -1.431 | 0.1525 | -? | 0     | 0     | 0 | 1       |
| rs11216375   | 11 | 117266094 | A | G | -1.431 | 0.1525 | -? | 0     | 0     | 0 | 1       |
| rs553370     | 11 | 117351433 | G | A | 1.43   | 0.1527 | +  | 0     | 0     | 0 | 1       |
| rs113300825  | 11 | 119544722 | T | C | -1.429 | 0.1529 | -? | 0     | 0     | 0 | 1       |
| rs633012     | 11 | 121032517 | A | G | 1.429  | 0.1531 | +  | 0     | 0     | 0 | 1       |
| rs1329232240 | 11 | 120159540 | C | T | -1.428 | 0.1532 | -? | 0     | 0     | 0 | 1       |
| rs654176     | 11 | 117961309 | G | C | -1.428 | 0.1532 | -? | 0     | 0     | 0 | 1       |
| rs7951628    | 11 | 120161117 | A | G | -1.428 | 0.1532 | -? | 0     | 0     | 0 | 1       |
| rs11601168   | 11 | 116571138 | A | T | -1.427 | 0.1536 | -? | 0     | 0     | 0 | 1       |
| rs2155854    | 11 | 118026675 | T | C | -1.427 | 0.1536 | -? | 0     | 0     | 0 | 1       |
| rs12221682   | 11 | 116578217 | G | C | 1.426  | 0.1539 | +  | 0     | 0     | 0 | 1       |
| rs11217785   | 11 | 120152591 | T | C | -1.426 | 0.154  | -? | 0     | 0     | 0 | 1       |
| rs12361671   | 11 | 117798560 | A | T | 1.426  | 0.154  | +  | 0     | 0     | 0 | 1       |
| rs2155810    | 11 | 120163869 | C | T | -1.425 | 0.1541 | -? | 0     | 0     | 0 | 1       |
| rs12278730   | 11 | 120423569 | T | C | 1.425  | 0.1542 | +  | 0     | 0     | 0 | 1       |
| rs12363277   | 11 | 118763736 | C | T | -1.425 | 0.1542 | +  | -22.4 | 2.451 | 1 | 0.1175  |
| rs59781045   | 11 | 117095283 | T | C | -1.425 | 0.1543 | -? | 0     | 0     | 0 | 1       |
| rs527258     | 11 | 121027240 | A | T | 1.423  | 0.1546 | +  | 0     | 0     | 0 | 1       |
| rs77802172   | 11 | 120149184 | A | G | -1.423 | 0.1546 | -? | 0     | 0     | 0 | 1       |
| rs12789310   | 11 | 116197149 | G | A | 1.423  | 0.1547 | +  | -1.3  | 2.962 | 1 | 0.08525 |
| rs7128690    | 11 | 120521504 | T | G | 1.423  | 0.1547 | +  | 0     | 0     | 0 | 1       |
| rs10892687   | 11 | 121059141 | A | G | 1.423  | 0.1548 | +  | 0     | 0     | 0 | 1       |
| rs12280027   | 11 | 116399067 | G | C | -1.423 | 0.1548 | -? | 0     | 0     | 0 | 1       |
| rs11605307   | 11 | 119931576 | T | C | -1.422 | 0.1549 | -? | 0     | 0     | 0 | 1       |
| rs61740780   | 11 | 117886499 | A | G | 1.422  | 0.1549 | +  | 0     | 0     | 0 | 1       |
| rs79959350   | 11 | 120025452 | G | A | 1.422  | 0.1549 | +  | 0     | 0     | 0 | 1       |
| rs906544     | 11 | 116374399 | C | T | 1.422  | 0.1549 | +  | 0     | 0     | 0 | 1       |
| rs1944154    | 11 | 116501409 | C | T | 1.422  | 0.155  | +  | 0     | 0     | 0 | 1       |
| rs608818     | 11 | 120993071 | T | C | -1.421 | 0.1552 | -? | 0     | 0     | 0 | 1       |
| rs1787680    | 11 | 116664776 | A | T | 1.421  | 0.1553 | ++ | 0     | 0.041 | 1 | 0.8402  |
| rs1241655    | 11 | 116837808 | T | G | -1.42  | 0.1556 | -? | 0     | 0     | 0 | 1       |
| rs10892020   | 11 | 116589652 | G | C | -1.419 | 0.1558 | -- | 0     | 0.239 | 1 | 0.6249  |
| rs523549     | 11 | 116511028 | A | G | -1.419 | 0.1558 | -? | 0     | 0     | 0 | 1       |

|              |    |           |   |   |        |        |    |      |       |   |         |
|--------------|----|-----------|---|---|--------|--------|----|------|-------|---|---------|
| rs7936362    | 11 | 117635223 | A | C | -1.419 | 0.1558 | -? | 0    | 0     | 0 | 1       |
| rs3016581    | 11 | 117106116 | A | G | 1.419  | 0.1559 | +? | 0    | 0     | 0 | 1       |
| rs4582985    | 11 | 120554041 | G | C | -1.419 | 0.1559 | -? | 0    | 0     | 0 | 1       |
| rs546916     | 11 | 121035860 | T | G | 1.419  | 0.1559 | +? | 0    | 0     | 0 | 1       |
| rs7121784    | 11 | 120159052 | A | C | -1.419 | 0.1559 | -? | 0    | 0     | 0 | 1       |
| rs1263149    | 11 | 116639941 | G | A | -1.419 | 0.156  | -- | 0    | 0.364 | 1 | 0.5461  |
| rs34463064   | 11 | 120563557 | T | C | -1.419 | 0.156  | -? | 0    | 0     | 0 | 1       |
| rs1670195    | 11 | 120008468 | C | G | 1.418  | 0.1562 | +? | 0    | 0     | 0 | 1       |
| rs80183540   | 11 | 117623674 | T | C | -1.417 | 0.1565 | -? | 0    | 0     | 0 | 1       |
| rs12225548   | 11 | 118535840 | G | C | -1.416 | 0.1566 | -- | 0    | 0.278 | 1 | 0.5978  |
| rs13377448   | 11 | 116307041 | T | G | -1.416 | 0.1567 | -? | 0    | 0     | 0 | 1       |
| rs139886195  | 11 | 119804760 | A | C | -1.416 | 0.1569 | -? | 0    | 0     | 0 | 1       |
| rs11216633   | 11 | 117800269 | G | C | 1.415  | 0.1572 | +? | 0    | 0     | 0 | 1       |
| rs11216634   | 11 | 117800328 | G | A | 1.415  | 0.1572 | +? | 0    | 0     | 0 | 1       |
| rs11217076   | 11 | 118745664 | G | T | 1.413  | 0.1576 | ++ | 0    | 0.149 | 1 | 0.6992  |
| rs2542061    | 11 | 116672231 | A | G | -1.413 | 0.1576 | -- | 0    | 0.456 | 1 | 0.4996  |
| rs659042     | 11 | 120997460 | A | C | -1.413 | 0.1576 | -? | 0    | 0     | 0 | 1       |
| rs7119967    | 11 | 117646768 | A | G | -1.413 | 0.1577 | -? | 0    | 0     | 0 | 1       |
| rs663031     | 11 | 121033277 | T | C | 1.412  | 0.1579 | +? | 0    | 0     | 0 | 1       |
| rs66633375   | 11 | 119772803 | A | T | 1.412  | 0.158  | +? | 0    | 0     | 0 | 1       |
| rs1263151    | 11 | 116641028 | C | T | -1.411 | 0.1581 | -- | 0    | 0.025 | 1 | 0.8744  |
| rs576271     | 11 | 121034992 | A | T | 1.411  | 0.1581 | +? | 0    | 0     | 0 | 1       |
| rs11216937   | 11 | 118507478 | T | C | -1.411 | 0.1583 | -- | 0    | 0.355 | 1 | 0.5514  |
| rs617692     | 11 | 120986933 | T | C | -1.411 | 0.1583 | -? | 0    | 0     | 0 | 1       |
| rs4936513    | 11 | 120157168 | A | T | -1.41  | 0.1585 | -? | 0    | 0     | 0 | 1       |
| rs664059     | 11 | 116642137 | C | T | -1.41  | 0.1586 | -- | 0    | 0.284 | 1 | 0.5938  |
| rs80015904   | 11 | 118516903 | A | G | -1.409 | 0.1588 | -- | 0    | 0.368 | 1 | 0.5443  |
| rs1339633702 | 11 | 117088082 | T | C | -1.409 | 0.1589 | -? | 0    | 0     | 0 | 1       |
| rs583842     | 11 | 121001345 | C | T | -1.409 | 0.1589 | -? | 0    | 0     | 0 | 1       |
| rs114005593  | 11 | 117345114 | C | G | -1.408 | 0.159  | -? | 0    | 0     | 0 | 1       |
| rs79297003   | 11 | 117344866 | T | C | -1.408 | 0.159  | -? | 0    | 0     | 0 | 1       |
| rs11820805   | 11 | 118888831 | C | T | -1.408 | 0.1592 | -- | 0    | 0.263 | 1 | 0.6078  |
| rs10892558   | 11 | 120139487 | A | G | -1.407 | 0.1593 | -? | 0    | 0     | 0 | 1       |
| rs12806755   | 11 | 116202789 | C | T | 1.408  | 0.1593 | +- | -0.4 | 2.988 | 1 | 0.08389 |
| rs7128589    | 11 | 119775102 | C | T | 1.407  | 0.1593 | +? | 0    | 0     | 0 | 1       |
| rs71482119   | 11 | 117722478 | G | T | -1.408 | 0.1593 | -- | 0    | 0.035 | 1 | 0.8514  |
| rs566269     | 11 | 116351511 | T | C | -1.407 | 0.1594 | -? | 0    | 0     | 0 | 1       |
| rs180377     | 11 | 116589127 | T | C | -1.406 | 0.1597 | +- | 0    | 0.993 | 1 | 0.319   |
| rs631969     | 11 | 121065886 | T | C | 1.406  | 0.1598 | +? | 0    | 0     | 0 | 1       |
| rs4936533    | 11 | 120496664 | T | C | -1.405 | 0.1599 | -? | 0    | 0     | 0 | 1       |
| rs624176     | 11 | 119893391 | T | C | 1.405  | 0.1599 | +? | 0    | 0     | 0 | 1       |
| rs2508655    | 11 | 120423595 | C | G | 1.405  | 0.16   | +? | 0    | 0     | 0 | 1       |
| rs4537790    | 11 | 117661356 | T | C | -1.405 | 0.1601 | -? | 0    | 0     | 0 | 1       |
| rs55753209   | 11 | 117392722 | A | G | -1.405 | 0.1601 | -? | 0    | 0     | 0 | 1       |
| rs61901400   | 11 | 120590901 | A | G | 1.404  | 0.1602 | +? | 0    | 0     | 0 | 1       |
| rs2174880    | 11 | 116304983 | G | A | 1.404  | 0.1604 | +? | 0    | 0     | 0 | 1       |
| rs632121     | 11 | 121003286 | T | A | -1.404 | 0.1604 | -? | 0    | 0     | 0 | 1       |
| rs511401     | 11 | 119250060 | C | G | 1.403  | 0.1605 | ++ | 0    | 0.587 | 1 | 0.4434  |
| rs12365095   | 11 | 118516774 | T | C | -1.403 | 0.1606 | -- | 0    | 0.278 | 1 | 0.5982  |
| rs12278740   | 11 | 120423601 | T | C | 1.403  | 0.1607 | +? | 0    | 0     | 0 | 1       |
| rs520805     | 11 | 121000774 | C | T | -1.403 | 0.1607 | -? | 0    | 0     | 0 | 1       |
| rs663435     | 11 | 121033374 | G | A | 1.403  | 0.1607 | +? | 0    | 0     | 0 | 1       |
| rs61906060   | 11 | 116498649 | G | A | 1.402  | 0.161  | +? | 0    | 0     | 0 | 1       |
| rs3889572    | 11 | 117300092 | T | C | -1.401 | 0.1611 | -? | 0    | 0     | 0 | 1       |
| rs10750170   | 11 | 120164102 | G | A | -1.401 | 0.1612 | -? | 0    | 0     | 0 | 1       |
| rs12280296   | 11 | 120570587 | G | A | 1.401  | 0.1613 | +? | 0    | 0     | 0 | 1       |

|             |    |           |   |   |        |        |    |   |       |   |        |
|-------------|----|-----------|---|---|--------|--------|----|---|-------|---|--------|
| rs117231130 | 11 | 116758658 | C | T | 1.4    | 0.1615 | +  | 0 | 0     | 0 | 1      |
| rs6589606   | 11 | 117092886 | T | C | -1.4   | 0.1615 | -  | 0 | 0     | 0 | 1      |
| rs675714    | 11 | 119880923 | A | G | 1.4    | 0.1616 | +  | 0 | 0     | 0 | 1      |
| rs12362152  | 11 | 118516737 | G | A | -1.399 | 0.1618 | -- | 0 | 0.259 | 1 | 0.6108 |
| rs11602764  | 11 | 118888619 | G | A | -1.398 | 0.1622 | -- | 0 | 0.262 | 1 | 0.6086 |
| rs11824502  | 11 | 117646682 | G | C | -1.398 | 0.1622 | -  | 0 | 0     | 0 | 1      |
| rs6589858   | 11 | 121021515 | C | T | 1.397  | 0.1624 | +  | 0 | 0     | 0 | 1      |
| rs12226676  | 11 | 116302939 | G | T | -1.397 | 0.1625 | -  | 0 | 0     | 0 | 1      |
| rs61906588  | 11 | 116362654 | T | C | -1.396 | 0.1628 | -  | 0 | 0     | 0 | 1      |
| rs12281528  | 11 | 116399336 | A | G | -1.395 | 0.1629 | -  | 0 | 0     | 0 | 1      |
| rs3017780   | 11 | 116352008 | G | T | -1.395 | 0.163  | -  | 0 | 0     | 0 | 1      |
| rs12273984  | 11 | 120570346 | C | T | 1.393  | 0.1636 | +  | 0 | 0     | 0 | 1      |
| rs11217514  | 11 | 119674096 | A | G | 1.392  | 0.1638 | ++ | 0 | 0.072 | 1 | 0.7883 |
| rs614192    | 11 | 119248709 | G | A | 1.392  | 0.1639 | ++ | 0 | 0.597 | 1 | 0.4395 |
| rs12271161  | 11 | 116979911 | A | G | -1.39  | 0.1645 | -  | 0 | 0     | 0 | 1      |
| rs17124632  | 11 | 120848717 | A | G | -1.39  | 0.1645 | -  | 0 | 0     | 0 | 1      |
| rs7934455   | 11 | 116359851 | C | T | -1.39  | 0.1645 | -  | 0 | 0     | 0 | 1      |
| rs11216938  | 11 | 118514625 | T | C | -1.39  | 0.1646 | -- | 0 | 0.243 | 1 | 0.6219 |
| rs684233    | 11 | 119927038 | A | G | 1.39   | 0.1646 | +  | 0 | 0     | 0 | 1      |
| rs665403    | 11 | 117307122 | T | C | -1.389 | 0.1647 | -  | 0 | 0     | 0 | 1      |
| rs495258    | 11 | 117507325 | T | C | -1.389 | 0.1648 | -  | 0 | 0     | 0 | 1      |
| rs73010609  | 11 | 119768716 | T | C | 1.389  | 0.1649 | +  | 0 | 0     | 0 | 1      |
| rs10790256  | 11 | 118534082 | T | C | -1.388 | 0.1651 | -- | 0 | 0.279 | 1 | 0.5975 |
| rs2155258   | 11 | 120657444 | G | A | 1.388  | 0.1652 | +  | 0 | 0     | 0 | 1      |
| rs61903859  | 11 | 117638305 | A | C | -1.388 | 0.1652 | -  | 0 | 0     | 0 | 1      |
| rs10790374  | 11 | 120157518 | C | T | -1.387 | 0.1653 | -  | 0 | 0     | 0 | 1      |
| rs11604214  | 11 | 119593446 | A | G | 1.387  | 0.1653 | +  | 0 | 0     | 0 | 1      |
| rs525390    | 11 | 117111214 | A | G | 1.387  | 0.1653 | +  | 0 | 0     | 0 | 1      |
| rs12273820  | 11 | 119805016 | C | T | -1.387 | 0.1654 | -  | 0 | 0     | 0 | 1      |
| rs1022080   | 11 | 119509625 | C | T | 1.386  | 0.1656 | +  | 0 | 0     | 0 | 1      |
| rs4938304   | 11 | 116588425 | T | C | -1.386 | 0.1656 | -  | 0 | 0     | 0 | 1      |
| rs17748     | 11 | 118528424 | T | C | -1.386 | 0.1659 | -- | 0 | 0.338 | 1 | 0.5612 |
| rs685425    | 11 | 117429728 | T | C | -1.385 | 0.166  | -  | 0 | 0     | 0 | 1      |
| rs12575869  | 11 | 117824206 | G | A | -1.385 | 0.1661 | -- | 0 | 0     | 1 | 0.992  |
| rs61903855  | 11 | 117605731 | C | G | -1.385 | 0.1661 | -  | 0 | 0     | 0 | 1      |
| rs7928371   | 11 | 118529127 | A | G | -1.385 | 0.1661 | -- | 0 | 0.25  | 1 | 0.6167 |
| rs651896    | 11 | 117961839 | T | C | -1.385 | 0.1662 | -  | 0 | 0     | 0 | 1      |
| rs11819854  | 11 | 117646805 | T | A | -1.384 | 0.1665 | -  | 0 | 0     | 0 | 1      |
| rs148092485 | 11 | 117397271 | A | T | -1.384 | 0.1665 | -  | 0 | 0     | 0 | 1      |
| rs2156633   | 11 | 120786892 | C | T | -1.384 | 0.1665 | -  | 0 | 0     | 0 | 1      |
| rs3825059   | 11 | 118973113 | A | C | 1.382  | 0.167  | +  | 0 | 0     | 0 | 1      |
| rs73022382  | 11 | 117352364 | A | G | -1.382 | 0.1671 | -  | 0 | 0     | 0 | 1      |
| rs112048745 | 11 | 117793222 | T | C | 1.381  | 0.1674 | +  | 0 | 0     | 0 | 1      |
| rs11217297  | 11 | 119334629 | A | G | 1.38   | 0.1676 | +  | 0 | 0     | 0 | 1      |
| rs10892657  | 11 | 120864806 | C | A | -1.38  | 0.1677 | -  | 0 | 0     | 0 | 1      |
| rs79988761  | 11 | 120126017 | A | G | 1.38   | 0.1677 | +  | 0 | 0     | 0 | 1      |
| rs2070668   | 11 | 116701153 | T | G | -1.379 | 0.1679 | -  | 0 | 0     | 0 | 1      |
| rs61907566  | 11 | 116748905 | G | C | 1.379  | 0.1679 | +  | 0 | 0     | 0 | 1      |
| rs4245211   | 11 | 120155303 | G | A | -1.379 | 0.168  | -  | 0 | 0     | 0 | 1      |
| rs73022498  | 11 | 117797120 | C | T | 1.379  | 0.168  | +  | 0 | 0     | 0 | 1      |
| rs549298    | 11 | 116354466 | G | A | -1.378 | 0.1683 | -  | 0 | 0     | 0 | 1      |
| rs11216583  | 11 | 117725057 | G | C | -1.377 | 0.1685 | -- | 0 | 0.042 | 1 | 0.8378 |
| rs4396299   | 11 | 120935369 | A | G | -1.377 | 0.1686 | -  | 0 | 0     | 0 | 1      |
| rs4936578   | 11 | 120999258 | G | A | 1.377  | 0.1686 | +  | 0 | 0     | 0 | 1      |
| rs11216658  | 11 | 117842743 | C | G | 1.376  | 0.1687 | +  | 0 | 0     | 0 | 1      |
| rs10892640  | 11 | 120789508 | G | A | 1.376  | 0.1688 | +  | 0 | 0     | 0 | 1      |

|             |    |           |   |   |        |        |    |      |       |   |        |
|-------------|----|-----------|---|---|--------|--------|----|------|-------|---|--------|
| rs77683187  | 11 | 117085210 | C | A | -1.376 | 0.1688 | -? | 0    | 0     | 0 | 1      |
| rs2298647   | 11 | 117671641 | A | T | -1.375 | 0.1691 | -? | 0    | 0     | 0 | 1      |
| rs118070092 | 11 | 119837014 | A | G | -1.375 | 0.1692 | -? | 0    | 0     | 0 | 1      |
| rs11218148  | 11 | 120992119 | A | C | 1.374  | 0.1695 | +  | 0    | 0     | 0 | 1      |
| rs4936576   | 11 | 120992859 | C | G | 1.374  | 0.1695 | +  | 0    | 0     | 0 | 1      |
| rs4936537   | 11 | 120526365 | G | A | -1.373 | 0.1699 | -? | 0    | 0     | 0 | 1      |
| rs4245041   | 11 | 120526637 | C | T | -1.372 | 0.1701 | -? | 0    | 0     | 0 | 1      |
| rs520315    | 11 | 117207626 | C | T | 1.372  | 0.1701 | +  | 0    | 0     | 0 | 1      |
| rs620848    | 11 | 117207628 | G | C | 1.372  | 0.1701 | +  | 0    | 0     | 0 | 1      |
| rs111227443 | 11 | 118590961 | T | C | 1.372  | 0.1702 | ++ | 0    | 0.18  | 1 | 0.671  |
| rs11821535  | 11 | 119518808 | A | C | -1.372 | 0.1702 | -? | 0    | 0     | 0 | 1      |
| rs10891982  | 11 | 116357955 | T | C | -1.371 | 0.1704 | -? | 0    | 0     | 0 | 1      |
| rs11601867  | 11 | 120705673 | A | G | 1.371  | 0.1704 | +  | 0    | 0     | 0 | 1      |
| rs1828121   | 11 | 116354211 | A | G | -1.369 | 0.1709 | -? | 0    | 0     | 0 | 1      |
| rs10892692  | 11 | 121103704 | G | A | 1.369  | 0.171  | +  | 0    | 0     | 0 | 1      |
| rs192734017 | 11 | 119029058 | A | G | -1.369 | 0.171  | -? | 0    | 0     | 0 | 1      |
| rs6421566   | 11 | 117671398 | G | A | -1.369 | 0.171  | -? | 0    | 0     | 0 | 1      |
| rs679607    | 11 | 121034651 | G | A | 1.369  | 0.171  | +  | 0    | 0     | 0 | 1      |
| rs7934236   | 11 | 120193511 | G | C | 1.369  | 0.171  | ++ | 0    | 0.594 | 1 | 0.4407 |
| rs543119    | 11 | 121014904 | G | A | 1.369  | 0.1711 | +  | 0    | 0     | 0 | 1      |
| rs685440    | 11 | 117429718 | T | G | -1.369 | 0.1711 | -? | 0    | 0     | 0 | 1      |
| rs7125224   | 11 | 121004851 | A | G | 1.368  | 0.1713 | +  | 0    | 0     | 0 | 1      |
| rs192113495 | 11 | 118874272 | G | T | -1.368 | 0.1714 | -- | -149 | 1.205 | 1 | 0.2723 |
| rs11217787  | 11 | 120153414 | A | T | -1.367 | 0.1715 | -? | 0    | 0     | 0 | 1      |
| rs2276065   | 11 | 118530611 | C | T | -1.367 | 0.1715 | -- | 0    | 0.114 | 1 | 0.7355 |
| rs12970     | 11 | 117074109 | A | G | -1.367 | 0.1716 | -? | 0    | 0     | 0 | 1      |
| rs10892527  | 11 | 119932137 | A | G | -1.365 | 0.1723 | -? | 0    | 0     | 0 | 1      |
| rs61898762  | 11 | 120343033 | G | T | -1.365 | 0.1723 | -? | 0    | 0     | 0 | 1      |
| rs71482116  | 11 | 117681749 | A | G | 1.365  | 0.1723 | +  | 0    | 0     | 0 | 1      |
| rs7105213   | 11 | 120505511 | T | C | 1.365  | 0.1724 | +  | 0    | 0     | 0 | 1      |
| rs611475    | 11 | 117950796 | C | T | -1.364 | 0.1725 | -? | 0    | 0     | 0 | 1      |
| rs754872    | 11 | 119802424 | T | C | 1.364  | 0.1725 | +  | 0    | 0     | 0 | 1      |
| rs893840    | 11 | 116199943 | C | T | -1.364 | 0.1725 | -? | 0    | 0     | 0 | 1      |
| rs12363946  | 11 | 116423005 | A | T | -1.364 | 0.1727 | -? | 0    | 0     | 0 | 1      |
| rs22298     | 11 | 121018954 | G | A | 1.363  | 0.1728 | +  | 0    | 0     | 0 | 1      |
| rs77776594  | 11 | 120563386 | A | G | 1.363  | 0.1728 | +  | 0    | 0     | 0 | 1      |
| rs11216551  | 11 | 117678420 | A | G | -1.363 | 0.1729 | -? | 0    | 0     | 0 | 1      |
| rs658187    | 11 | 119352570 | T | G | -1.363 | 0.1729 | -? | 0    | 0     | 0 | 1      |
| rs7129952   | 11 | 116495714 | A | T | -1.363 | 0.1729 | -? | 0    | 0     | 0 | 1      |
| rs75510322  | 11 | 120413702 | C | A | 1.363  | 0.1729 | +  | 0    | 0     | 0 | 1      |
| rs4635090   | 11 | 120844222 | A | G | -1.363 | 0.173  | -? | 0    | 0     | 0 | 1      |
| rs61906586  | 11 | 116360636 | C | T | -1.363 | 0.173  | -? | 0    | 0     | 0 | 1      |
| rs80170872  | 11 | 117909810 | A | G | 1.362  | 0.1732 | ++ | 0    | 0.005 | 1 | 0.9424 |
| rs1014034   | 11 | 117661734 | G | C | -1.361 | 0.1734 | -? | 0    | 0     | 0 | 1      |
| rs60007061  | 11 | 117937225 | A | C | 1.361  | 0.1736 | ++ | 0    | 0.007 | 1 | 0.9337 |
| rs7112429   | 11 | 117931489 | A | T | 1.36   | 0.1737 | ++ | 0    | 0.007 | 1 | 0.9335 |
| rs520332    | 11 | 120824323 | T | G | 1.36   | 0.1738 | +  | 0    | 0     | 0 | 1      |
| rs4936424   | 11 | 118009674 | T | C | -1.36  | 0.1739 | -- | 0    | 0.341 | 1 | 0.5595 |
| rs11217528  | 11 | 119701587 | C | A | 1.359  | 0.1742 | +  | 0    | 0     | 0 | 1      |
| rs1941299   | 11 | 121108907 | C | A | 1.358  | 0.1744 | +  | 0    | 0     | 0 | 1      |
| rs34189224  | 11 | 120253329 | A | G | 1.358  | 0.1745 | +  | 0    | 0     | 0 | 1      |
| rs12417676  | 11 | 116497466 | C | A | -1.357 | 0.1747 | -? | 0    | 0     | 0 | 1      |
| rs603179    | 11 | 119892194 | A | G | 1.357  | 0.1747 | +  | 0    | 0     | 0 | 1      |
| rs7940779   | 11 | 120419218 | T | C | 1.357  | 0.1747 | +  | 0    | 0     | 0 | 1      |
| rs61903185  | 11 | 120902930 | A | G | -1.357 | 0.1748 | -? | 0    | 0     | 0 | 1      |
| rs78995144  | 11 | 120867999 | A | G | -1.357 | 0.1748 | -? | 0    | 0     | 0 | 1      |

|             |    |           |   |   |        |        |    |       |       |   |        |
|-------------|----|-----------|---|---|--------|--------|----|-------|-------|---|--------|
| rs76547700  | 11 | 119849683 | T | G | -1.357 | 0.1749 | -? | 0     | 0     | 0 | 1      |
| rs1787693   | 11 | 116542585 | A | G | -1.356 | 0.1751 | -? | 0     | 0     | 0 | 1      |
| rs17120753  | 11 | 117308432 | C | T | 1.356  | 0.1752 | +? | 0     | 0     | 0 | 1      |
| rs11216058  | 11 | 116501684 | A | G | -1.355 | 0.1754 | -? | 0     | 0     | 0 | 1      |
| rs649197    | 11 | 119353238 | A | G | -1.355 | 0.1754 | -? | 0     | 0     | 0 | 1      |
| rs491428    | 11 | 116353002 | T | G | -1.355 | 0.1755 | -? | 0     | 0     | 0 | 1      |
| rs490526    | 11 | 116353106 | T | A | -1.354 | 0.1756 | -? | 0     | 0     | 0 | 1      |
| rs4938270   | 11 | 116272744 | T | C | -1.354 | 0.1757 | -? | 0     | 0     | 0 | 1      |
| rs7120040   | 11 | 120349142 | G | A | -1.354 | 0.1757 | -? | 0     | 0     | 0 | 1      |
| rs7931398   | 11 | 116879676 | C | T | -1.353 | 0.1759 | -? | 0     | 0     | 0 | 1      |
| rs617345    | 11 | 117899816 | G | T | 1.353  | 0.176  | +- | -89.7 | 1.582 | 1 | 0.2085 |
| rs630842    | 11 | 119924436 | A | G | 1.353  | 0.1762 | +? | 0     | 0     | 0 | 1      |
| rs652376    | 11 | 119924214 | C | G | 1.353  | 0.1762 | +? | 0     | 0     | 0 | 1      |
| rs2276343   | 11 | 117375596 | A | G | -1.352 | 0.1763 | -? | 0     | 0     | 0 | 1      |
| rs1240773   | 11 | 116520527 | T | G | -1.351 | 0.1766 | -? | 0     | 0     | 0 | 1      |
| rs12790634  | 11 | 120176310 | A | G | 1.351  | 0.1767 | +? | 0     | 0     | 0 | 1      |
| rs12274300  | 11 | 120580038 | G | C | 1.35   | 0.1769 | +? | 0     | 0     | 0 | 1      |
| rs12285075  | 11 | 119755047 | A | G | -1.35  | 0.1769 | -? | 0     | 0     | 0 | 1      |
| rs7934267   | 11 | 117923252 | T | G | -1.35  | 0.1769 | -? | 0     | 0     | 0 | 1      |
| rs7937145   | 11 | 117923358 | A | G | -1.35  | 0.1769 | -? | 0     | 0     | 0 | 1      |
| rs947889    | 11 | 117874531 | C | T | 1.35   | 0.1769 | ++ | 0     | 0.158 | 1 | 0.691  |
| rs948467    | 11 | 117962813 | G | A | -1.35  | 0.1769 | -? | 0     | 0     | 0 | 1      |
| rs187900569 | 11 | 119337452 | C | G | 1.35   | 0.177  | +? | 0     | 0     | 0 | 1      |
| rs494560    | 11 | 118521549 | A | G | 1.35   | 0.177  | ++ | 0     | 0.153 | 1 | 0.6954 |
| rs56112767  | 11 | 117641216 | G | C | -1.349 | 0.1772 | -? | 0     | 0     | 0 | 1      |
| rs10892248  | 11 | 118501022 | A | G | -1.349 | 0.1773 | -- | 0     | 0.273 | 1 | 0.6012 |
| rs522645    | 11 | 117101574 | A | C | -1.348 | 0.1776 | -? | 0     | 0     | 0 | 1      |
| rs598650    | 11 | 120980537 | T | C | -1.348 | 0.1776 | -? | 0     | 0     | 0 | 1      |
| rs17122150  | 11 | 118271860 | G | C | -1.348 | 0.1777 | -- | 0     | 0.101 | 1 | 0.7506 |
| rs2236661   | 11 | 118499394 | G | C | -1.348 | 0.1778 | -- | 0     | 0.299 | 1 | 0.5845 |
| rs493308    | 11 | 116352789 | T | C | -1.347 | 0.1781 | -? | 0     | 0     | 0 | 1      |
| rs554912    | 11 | 117340285 | T | C | 1.347  | 0.1781 | +? | 0     | 0     | 0 | 1      |
| rs4245184   | 11 | 118510562 | A | G | 1.346  | 0.1784 | ++ | 0     | 0.123 | 1 | 0.7258 |
| rs644273    | 11 | 118511352 | T | C | 1.346  | 0.1784 | ++ | 0     | 0.123 | 1 | 0.7258 |
| rs11603533  | 11 | 120324517 | G | C | 1.345  | 0.1785 | +? | 0     | 0     | 0 | 1      |
| rs687009    | 11 | 119246567 | C | G | 1.345  | 0.1785 | ++ | 0     | 0.637 | 1 | 0.4249 |
| rs75375456  | 11 | 117430025 | T | G | 1.345  | 0.1785 | +? | 0     | 0     | 0 | 1      |
| rs10892641  | 11 | 120789800 | G | A | 1.345  | 0.1786 | +? | 0     | 0     | 0 | 1      |
| rs11218077  | 11 | 120822001 | C | T | 1.345  | 0.1787 | +? | 0     | 0     | 0 | 1      |
| rs11603023  | 11 | 118486067 | T | C | 1.345  | 0.1787 | ++ | 0     | 0.157 | 1 | 0.6924 |
| rs947990    | 11 | 116557314 | T | G | -1.345 | 0.1787 | -? | 0     | 0     | 0 | 1      |
| rs626252    | 11 | 117949861 | G | A | -1.344 | 0.1789 | -- | 0     | 0.917 | 1 | 0.3383 |
| rs576945    | 11 | 119246896 | G | A | 1.344  | 0.179  | ++ | 0     | 0.641 | 1 | 0.4234 |
| rs685916    | 11 | 117434215 | A | G | -1.344 | 0.179  | -? | 0     | 0     | 0 | 1      |
| rs74505326  | 11 | 116756690 | G | A | 1.343  | 0.1792 | +? | 0     | 0     | 0 | 1      |
| rs35021198  | 11 | 117448799 | T | C | 1.343  | 0.1794 | +? | 0     | 0     | 0 | 1      |
| rs508440    | 11 | 119745457 | G | C | -1.343 | 0.1794 | -? | 0     | 0     | 0 | 1      |
| rs78621482  | 11 | 120790033 | G | C | -1.343 | 0.1794 | -? | 0     | 0     | 0 | 1      |
| rs654423    | 11 | 118511757 | A | G | 1.342  | 0.1796 | ++ | 0     | 0.122 | 1 | 0.7274 |
| rs672499    | 11 | 119351636 | A | G | -1.342 | 0.1796 | -? | 0     | 0     | 0 | 1      |
| rs34238850  | 11 | 120462315 | T | C | 1.341  | 0.1798 | +? | 0     | 0     | 0 | 1      |
| rs556436    | 11 | 116352523 | C | T | -1.341 | 0.1799 | -? | 0     | 0     | 0 | 1      |
| rs11218103  | 11 | 120871324 | T | C | -1.341 | 0.18   | -? | 0     | 0     | 0 | 1      |
| rs12721031  | 11 | 116704505 | T | C | 1.34   | 0.1802 | +? | 0     | 0     | 0 | 1      |
| rs2370112   | 11 | 121192240 | C | T | -1.34  | 0.1802 | -? | 0     | 0     | 0 | 1      |
| rs12363335  | 11 | 119890299 | C | T | -1.34  | 0.1803 | -? | 0     | 0     | 0 | 1      |

|              |    |           |   |   |        |        |    |        |       |   |        |
|--------------|----|-----------|---|---|--------|--------|----|--------|-------|---|--------|
| rs7120174    | 11 | 120349310 | C | A | -1.34  | 0.1803 | -? | 0      | 0     | 0 | 1      |
| rs613018     | 11 | 119355747 | C | T | -1.34  | 0.1804 | -? | 0      | 0     | 0 | 1      |
| rs61900897   | 11 | 120418687 | C | G | -1.339 | 0.1805 | -? | 0      | 0     | 0 | 1      |
| rs11216582   | 11 | 117724493 | A | C | -1.339 | 0.1806 | -- | 0      | 0.051 | 1 | 0.8207 |
| rs11216867   | 11 | 118262407 | G | A | -1.339 | 0.1806 | -- | 0      | 0.143 | 1 | 0.7053 |
| rs7125693    | 11 | 117670651 | C | T | -1.339 | 0.1807 | -? | 0      | 0     | 0 | 1      |
| rs2187490    | 11 | 118713180 | G | T | 1.338  | 0.1808 | ++ | 0      | 0.111 | 1 | 0.7394 |
| rs4544011    | 11 | 120656866 | G | A | 1.338  | 0.1808 | +  | 0      | 0     | 0 | 1      |
| rs7107023    | 11 | 117796722 | T | C | 1.338  | 0.1808 | +  | 0      | 0     | 0 | 1      |
| rs180322     | 11 | 116626735 | C | T | -1.338 | 0.1809 | -+ | -152.3 | 1.189 | 1 | 0.2755 |
| rs500426     | 11 | 116485319 | T | C | 1.338  | 0.181  | +  | 0      | 0     | 0 | 1      |
| rs673841     | 11 | 119351329 | G | A | -1.338 | 0.181  | -? | 0      | 0     | 0 | 1      |
| rs8301       | 11 | 118895495 | G | C | -1.337 | 0.1811 | -- | 0      | 0.027 | 1 | 0.8688 |
| rs1134734    | 11 | 118965479 | A | G | -1.337 | 0.1812 | -? | 0      | 0     | 0 | 1      |
| rs533053     | 11 | 119353577 | C | G | -1.337 | 0.1812 | -? | 0      | 0     | 0 | 1      |
| rs649557     | 11 | 119353188 | T | C | -1.337 | 0.1812 | -? | 0      | 0     | 0 | 1      |
| rs650969     | 11 | 119352890 | C | T | -1.337 | 0.1812 | -? | 0      | 0     | 0 | 1      |
| rs7936556    | 11 | 118501299 | A | G | 1.337  | 0.1812 | ++ | 0      | 0.125 | 1 | 0.7233 |
| rs12361978   | 11 | 116391272 | G | C | 1.336  | 0.1814 | +  | 0      | 0     | 0 | 1      |
| rs12362794   | 11 | 120350393 | G | T | -1.336 | 0.1816 | -? | 0      | 0     | 0 | 1      |
| rs148990923  | 11 | 118722946 | T | C | -1.335 | 0.1817 | -- | 0      | 0.274 | 1 | 0.6007 |
| rs4293153    | 11 | 116416909 | G | A | -1.336 | 0.1817 | -? | 0      | 0     | 0 | 1      |
| rs1108627    | 11 | 116369980 | T | C | 1.335  | 0.1818 | +  | 0      | 0     | 0 | 1      |
| rs11828785   | 11 | 116501918 | T | C | -1.335 | 0.1819 | -? | 0      | 0     | 0 | 1      |
| rs1185802888 | 11 | 116259493 | T | A | -1.335 | 0.1819 | -? | 0      | 0     | 0 | 1      |
| rs17124739   | 11 | 120924671 | G | A | -1.335 | 0.1819 | -? | 0      | 0     | 0 | 1      |
| rs496371     | 11 | 117722715 | T | C | 1.334  | 0.1821 | +  | 0      | 0     | 0 | 1      |
| rs7943887    | 11 | 117670282 | G | C | -1.334 | 0.1821 | -? | 0      | 0     | 0 | 1      |
| rs76347292   | 11 | 117303108 | C | T | 1.333  | 0.1824 | +  | 0      | 0     | 0 | 1      |
| rs605531     | 11 | 117120027 | G | T | 1.333  | 0.1826 | +  | 0      | 0     | 0 | 1      |
| rs547344     | 11 | 119751375 | A | G | -1.332 | 0.1827 | -? | 0      | 0     | 0 | 1      |
| rs659127     | 11 | 119913037 | A | C | 1.332  | 0.1829 | +  | 0      | 0     | 0 | 1      |
| rs548429     | 11 | 119806852 | G | A | -1.331 | 0.1832 | -? | 0      | 0     | 0 | 1      |
| rs11218106   | 11 | 120873529 | A | T | -1.331 | 0.1833 | -? | 0      | 0     | 0 | 1      |
| rs56189546   | 11 | 119435096 | G | T | -1.33  | 0.1834 | -? | 0      | 0     | 0 | 1      |
| rs11216387   | 11 | 117310022 | G | A | -1.33  | 0.1835 | -? | 0      | 0     | 0 | 1      |
| rs7125694    | 11 | 117670657 | C | T | -1.33  | 0.1835 | -? | 0      | 0     | 0 | 1      |
| rs74482798   | 11 | 120565473 | G | C | -1.329 | 0.1839 | -? | 0      | 0     | 0 | 1      |
| rs76003278   | 11 | 120565293 | C | T | -1.329 | 0.1839 | -? | 0      | 0     | 0 | 1      |
| rs545108     | 11 | 116525229 | C | G | 1.328  | 0.1842 | +  | 0      | 0     | 0 | 1      |
| rs548893     | 11 | 117193619 | G | C | 1.328  | 0.1842 | +  | 0      | 0     | 0 | 1      |
| rs142260742  | 11 | 117425169 | T | C | 1.328  | 0.1843 | +  | 0      | 0     | 0 | 1      |
| rs80350215   | 11 | 117426035 | C | T | 1.328  | 0.1843 | +  | 0      | 0     | 0 | 1      |
| rs61901380   | 11 | 120579239 | A | G | 1.327  | 0.1844 | +  | 0      | 0     | 0 | 1      |
| rs7927559    | 11 | 117845564 | G | A | -1.327 | 0.1844 | -- | 0      | 0.002 | 1 | 0.9617 |
| rs10790210   | 11 | 117662639 | G | C | 1.327  | 0.1845 | +  | 0      | 0     | 0 | 1      |
| rs10892247   | 11 | 118490076 | A | G | -1.327 | 0.1845 | -- | 0      | 0.348 | 1 | 0.555  |
| rs73008681   | 11 | 119744365 | G | C | -1.327 | 0.1846 | -? | 0      | 0     | 0 | 1      |
| rs10892619   | 11 | 120571457 | T | C | -1.326 | 0.1847 | -? | 0      | 0     | 0 | 1      |
| rs10892525   | 11 | 119930631 | T | C | -1.326 | 0.1848 | -? | 0      | 0     | 0 | 1      |
| rs4938700    | 11 | 119516805 | C | G | 1.326  | 0.1848 | +  | 0      | 0     | 0 | 1      |
| rs7106292    | 11 | 120830051 | T | C | 1.326  | 0.1848 | +  | 0      | 0     | 0 | 1      |
| rs7123228    | 11 | 120715952 | G | A | 1.326  | 0.1848 | +  | 0      | 0     | 0 | 1      |
| rs11216493   | 11 | 117542149 | T | C | -1.325 | 0.1851 | -? | 0      | 0     | 0 | 1      |
| rs11600004   | 11 | 120708132 | T | C | 1.325  | 0.1851 | +  | 0      | 0     | 0 | 1      |
| rs4936380    | 11 | 117324068 | A | G | 1.325  | 0.1851 | +  | 0      | 0     | 0 | 1      |

|             |    |           |   |   |        |        |    |      |       |   |         |
|-------------|----|-----------|---|---|--------|--------|----|------|-------|---|---------|
| rs7113753   | 11 | 118889378 | A | G | -1.325 | 0.1852 | -- | 0    | 0.342 | 1 | 0.5587  |
| rs1892903   | 11 | 117669619 | T | C | -1.325 | 0.1853 | -? | 0    | 0     | 0 | 1       |
| rs12224952  | 11 | 119736232 | T | G | -1.324 | 0.1854 | -? | 0    | 0     | 0 | 1       |
| rs61897936  | 11 | 119933153 | T | C | -1.324 | 0.1854 | -? | 0    | 0     | 0 | 1       |
| rs11216806  | 11 | 118060549 | C | T | -1.324 | 0.1856 | +  | 17.2 | 3.625 | 1 | 0.05691 |
| rs6589547   | 11 | 116361705 | A | C | -1.323 | 0.1857 | -? | 0    | 0     | 0 | 1       |
| rs3016352   | 11 | 116521748 | G | A | 1.323  | 0.1859 | +  | 0    | 0     | 0 | 1       |
| rs600937    | 11 | 120985032 | G | A | -1.323 | 0.1859 | -- | 0    | 0.024 | 1 | 0.8776  |
| rs10892324  | 11 | 118903039 | G | T | 1.323  | 0.186  | +  | 0    | 0     | 0 | 1       |
| rs561791    | 11 | 117305418 | T | C | -1.322 | 0.1861 | -? | 0    | 0     | 0 | 1       |
| rs11217987  | 11 | 120579826 | A | T | 1.322  | 0.1863 | +  | 0    | 0     | 0 | 1       |
| rs17245326  | 11 | 119778929 | A | G | 1.322  | 0.1863 | +  | 0    | 0     | 0 | 1       |
| rs2305830   | 11 | 117266312 | G | C | -1.322 | 0.1863 | -? | 0    | 0     | 0 | 1       |
| rs6589580   | 11 | 116819873 | A | G | -1.322 | 0.1863 | -? | 0    | 0     | 0 | 1       |
| rs12363806  | 11 | 117658211 | A | G | 1.32   | 0.1867 | +  | 0    | 0     | 0 | 1       |
| rs10790280  | 11 | 118902609 | T | A | 1.32   | 0.1869 | +  | 0    | 0     | 0 | 1       |
| rs11218240  | 11 | 121151902 | T | C | -1.319 | 0.1872 | -? | 0    | 0     | 0 | 1       |
| rs3016347   | 11 | 116486664 | C | G | 1.319  | 0.1872 | +  | 0    | 0     | 0 | 1       |
| rs11216393  | 11 | 117314053 | A | G | -1.318 | 0.1875 | -? | 0    | 0     | 0 | 1       |
| rs10892322  | 11 | 118902749 | T | C | 1.317  | 0.188  | +  | 0    | 0     | 0 | 1       |
| rs12365956  | 11 | 117798431 | A | G | 1.317  | 0.188  | +  | 0    | 0     | 0 | 1       |
| rs12419866  | 11 | 119240624 | T | C | 1.317  | 0.188  | +  | 0    | 0     | 0 | 1       |
| rs73022500  | 11 | 117798073 | A | C | 1.317  | 0.188  | +  | 0    | 0     | 0 | 1       |
| rs1866683   | 11 | 116199624 | C | A | -1.316 | 0.1882 | -? | 0    | 0     | 0 | 1       |
| rs77642243  | 11 | 117795578 | C | T | 1.316  | 0.1882 | +  | 0    | 0     | 0 | 1       |
| rs7932967   | 11 | 117207665 | T | G | -1.316 | 0.1882 | -? | 0    | 0     | 0 | 1       |
| rs12292552  | 11 | 120565023 | A | G | 1.316  | 0.1883 | +  | 0    | 0     | 0 | 1       |
| rs4567478   | 11 | 120577423 | C | T | 1.315  | 0.1886 | +  | 0    | 0     | 0 | 1       |
| rs112464350 | 11 | 116539058 | A | C | 1.314  | 0.1887 | +  | 0    | 0     | 0 | 1       |
| rs4938471   | 11 | 117924986 | G | T | -1.314 | 0.1887 | -? | 0    | 0     | 0 | 1       |
| rs4499034   | 11 | 117323004 | T | C | 1.314  | 0.1889 | +  | 0    | 0     | 0 | 1       |
| rs541366    | 11 | 119744160 | C | A | -1.314 | 0.1889 | -? | 0    | 0     | 0 | 1       |
| rs56926846  | 11 | 120526291 | A | G | 1.314  | 0.1889 | +  | 0    | 0     | 0 | 1       |
| rs1940040   | 11 | 117393294 | C | G | -1.314 | 0.189  | -? | 0    | 0     | 0 | 1       |
| rs2276340   | 11 | 117391966 | A | G | -1.314 | 0.189  | -? | 0    | 0     | 0 | 1       |
| rs12800011  | 11 | 116501098 | G | A | -1.313 | 0.1892 | -? | 0    | 0     | 0 | 1       |
| rs77683570  | 11 | 118495287 | C | T | -1.313 | 0.1892 | -- | 0    | 0.347 | 1 | 0.5556  |
| rs7935609   | 11 | 116202035 | C | T | -1.313 | 0.1892 | -? | 0    | 0     | 0 | 1       |
| rs10892075  | 11 | 116982821 | T | C | -1.313 | 0.1893 | -? | 0    | 0     | 0 | 1       |
| rs138536663 | 11 | 121148641 | C | T | -1.312 | 0.1894 | -? | 0    | 0     | 0 | 1       |
| rs113708750 | 11 | 116198542 | T | C | -1.312 | 0.1895 | -? | 0    | 0     | 0 | 1       |
| rs17122154  | 11 | 118273019 | A | G | -1.312 | 0.1895 | -- | 0    | 0.109 | 1 | 0.7409  |
| rs61013776  | 11 | 120993723 | A | G | -1.312 | 0.1896 | -- | 0    | 0.286 | 1 | 0.5931  |
| rs9735317   | 11 | 118725383 | T | C | -1.312 | 0.1896 | -- | 0    | 0.027 | 1 | 0.8696  |
| rs7946325   | 11 | 120578917 | G | A | 1.311  | 0.1897 | +  | 0    | 0     | 0 | 1       |
| rs11217130  | 11 | 118902933 | T | A | 1.311  | 0.1899 | +  | 0    | 0     | 0 | 1       |
| rs3133855   | 11 | 120584851 | T | C | -1.311 | 0.19   | -? | 0    | 0     | 0 | 1       |
| rs3825060   | 11 | 118973112 | A | G | 1.311  | 0.19   | +  | 0    | 0     | 0 | 1       |
| rs75809806  | 11 | 117418077 | A | G | 1.31   | 0.1901 | +  | 0    | 0     | 0 | 1       |
| rs77342459  | 11 | 117420369 | G | C | 1.31   | 0.1901 | +  | 0    | 0     | 0 | 1       |
| rs80041541  | 11 | 117417384 | T | G | 1.31   | 0.1901 | +  | 0    | 0     | 0 | 1       |
| rs113784020 | 11 | 118559731 | T | C | 1.31   | 0.1902 | ++ | 0    | 0.168 | 1 | 0.6818  |
| rs494200    | 11 | 116352697 | A | G | -1.31  | 0.1902 | -? | 0    | 0     | 0 | 1       |
| rs60348146  | 11 | 117939413 | A | G | 1.31   | 0.1903 | ++ | 0    | 0.014 | 1 | 0.9071  |
| rs659705    | 11 | 119245349 | G | A | 1.31   | 0.1903 | ++ | 0    | 0.67  | 1 | 0.4132  |
| rs11215957  | 11 | 116355233 | C | T | -1.309 | 0.1907 | -? | 0    | 0     | 0 | 1       |

|              |    |           |   |   |        |        |    |        |       |   |        |
|--------------|----|-----------|---|---|--------|--------|----|--------|-------|---|--------|
| rs61901379   | 11 | 120577940 | A | G | 1.309  | 0.1907 | +? | 0      | 0     | 0 | 1      |
| rs535831     | 11 | 119346198 | C | T | -1.308 | 0.1908 | -? | 0      | 0     | 0 | 1      |
| rs647369     | 11 | 119347074 | A | T | -1.308 | 0.1908 | -? | 0      | 0     | 0 | 1      |
| rs686882     | 11 | 121023992 | G | A | 1.307  | 0.1911 | +? | 0      | 0     | 0 | 1      |
| rs112548685  | 11 | 116548489 | T | C | -1.307 | 0.1912 | -? | 0      | 0     | 0 | 1      |
| rs483598     | 11 | 118509668 | A | G | 1.307  | 0.1912 | ++ | 0      | 0.066 | 1 | 0.7979 |
| rs57401958   | 11 | 120947699 | G | A | -1.306 | 0.1914 | -? | 0      | 0     | 0 | 1      |
| rs111494641  | 11 | 119673277 | T | C | 1.306  | 0.1915 | ++ | 0      | 0.112 | 1 | 0.7375 |
| rs4936535    | 11 | 120505771 | G | A | 1.306  | 0.1916 | +? | 0      | 0     | 0 | 1      |
| rs61903853   | 11 | 117600518 | G | T | -1.306 | 0.1917 | -? | 0      | 0     | 0 | 1      |
| rs1939004    | 11 | 120920649 | G | A | -1.304 | 0.1922 | -? | 0      | 0     | 0 | 1      |
| rs11218239   | 11 | 121149531 | G | A | -1.304 | 0.1923 | -? | 0      | 0     | 0 | 1      |
| rs4938400    | 11 | 117399604 | A | C | -1.304 | 0.1923 | -? | 0      | 0     | 0 | 1      |
| rs4938401    | 11 | 117399605 | G | T | -1.304 | 0.1923 | -? | 0      | 0     | 0 | 1      |
| rs6589713    | 11 | 118872404 | C | T | -1.304 | 0.1923 | -- | 0      | 0.019 | 1 | 0.8902 |
| rs744983     | 11 | 120166358 | G | A | -1.304 | 0.1924 | -? | 0      | 0     | 0 | 1      |
| rs7942757    | 11 | 118903651 | A | G | 1.303  | 0.1925 | +? | 0      | 0     | 0 | 1      |
| rs11216934   | 11 | 118501459 | A | G | 1.303  | 0.1926 | ++ | 0      | 0.063 | 1 | 0.8014 |
| rs12286112   | 11 | 117755580 | G | A | 1.303  | 0.1927 | +? | 0      | 0     | 0 | 1      |
| rs6589663    | 11 | 118255278 | A | G | -1.303 | 0.1927 | -- | 0      | 0.181 | 1 | 0.6707 |
| rs28781001   | 11 | 120580572 | G | A | 1.302  | 0.1929 | +? | 0      | 0     | 0 | 1      |
| rs577396     | 11 | 118499469 | C | G | 1.302  | 0.1929 | ++ | 0      | 0.073 | 1 | 0.7873 |
| rs144716047  | 11 | 120871636 | G | C | -1.302 | 0.193  | -? | 0      | 0     | 0 | 1      |
| rs667125     | 11 | 120984999 | G | A | -1.302 | 0.193  | -- | 0      | 0.028 | 1 | 0.8682 |
| rs12276408   | 11 | 120568254 | G | A | 1.301  | 0.1931 | +? | 0      | 0     | 0 | 1      |
| rs73580459   | 11 | 116309713 | A | G | -1.301 | 0.1931 | -? | 0      | 0     | 0 | 1      |
| rs10892379   | 11 | 119393309 | G | A | -1.301 | 0.1932 | -? | 0      | 0     | 0 | 1      |
| rs1045947297 | 11 | 121003604 | G | T | 1.301  | 0.1934 | +? | 0      | 0     | 0 | 1      |
| rs17120523   | 11 | 117094591 | G | A | -1.3   | 0.1937 | -? | 0      | 0     | 0 | 1      |
| rs613442     | 11 | 119355678 | T | C | -1.299 | 0.1939 | -? | 0      | 0     | 0 | 1      |
| rs619585     | 11 | 117947433 | T | C | -1.299 | 0.1939 | -- | -187.5 | 1.044 | 1 | 0.307  |
| rs671160     | 11 | 117952387 | T | C | -1.299 | 0.1939 | -? | 0      | 0     | 0 | 1      |
| rs10892323   | 11 | 118902758 | C | G | 1.298  | 0.1943 | +? | 0      | 0     | 0 | 1      |
| rs1302598824 | 11 | 117700629 | T | C | -1.298 | 0.1943 | -? | 0      | 0     | 0 | 1      |
| rs1189010881 | 11 | 117314931 | T | G | -1.297 | 0.1947 | -? | 0      | 0     | 0 | 1      |
| rs12289923   | 11 | 121112889 | G | A | -1.297 | 0.1947 | -- | 0      | 0.278 | 1 | 0.5979 |
| rs34259384   | 11 | 120860524 | T | G | 1.297  | 0.1948 | +? | 0      | 0     | 0 | 1      |
| rs620236     | 11 | 119355134 | A | T | -1.296 | 0.1949 | -? | 0      | 0     | 0 | 1      |
| rs10892204   | 11 | 117906510 | T | C | -1.296 | 0.195  | -? | 0      | 0     | 0 | 1      |
| rs883245     | 11 | 119217311 | G | A | 1.296  | 0.1951 | +? | 0      | 0     | 0 | 1      |
| rs531280     | 11 | 119353746 | C | A | -1.295 | 0.1952 | -? | 0      | 0     | 0 | 1      |
| rs2277286    | 11 | 117102706 | G | C | 1.295  | 0.1953 | +? | 0      | 0     | 0 | 1      |
| rs12276533   | 11 | 118724116 | A | G | -1.295 | 0.1954 | -- | 0      | 0.014 | 1 | 0.9051 |
| rs613406     | 11 | 119355695 | C | T | -1.294 | 0.1955 | -? | 0      | 0     | 0 | 1      |
| rs45565037   | 11 | 118496119 | A | G | -1.294 | 0.1956 | -- | 0      | 0.236 | 1 | 0.6272 |
| rs1893970    | 11 | 117432034 | T | C | 1.294  | 0.1957 | +? | 0      | 0     | 0 | 1      |
| rs587069     | 11 | 119351324 | G | A | -1.294 | 0.1957 | -? | 0      | 0     | 0 | 1      |
| rs59489957   | 11 | 118284984 | T | C | -1.294 | 0.1957 | -- | 0      | 0.203 | 1 | 0.652  |
| rs7122879    | 11 | 120897295 | T | C | -1.294 | 0.1957 | -? | 0      | 0     | 0 | 1      |
| rs61904777   | 11 | 116362669 | C | T | -1.293 | 0.1959 | -? | 0      | 0     | 0 | 1      |
| rs1508108    | 11 | 116356720 | G | A | -1.293 | 0.1961 | -? | 0      | 0     | 0 | 1      |
| rs584092     | 11 | 120823396 | T | C | 1.293  | 0.1961 | +? | 0      | 0     | 0 | 1      |
| rs61900623   | 11 | 118012623 | T | C | -1.293 | 0.1961 | -? | 0      | 0     | 0 | 1      |
| rs112550319  | 11 | 116539809 | G | C | 1.292  | 0.1962 | +? | 0      | 0     | 0 | 1      |
| rs12802672   | 11 | 116534963 | G | A | 1.292  | 0.1962 | +? | 0      | 0     | 0 | 1      |
| rs618827     | 11 | 119355438 | A | G | -1.292 | 0.1962 | -? | 0      | 0     | 0 | 1      |

|             |    |           |   |   |        |        |    |      |       |   |         |
|-------------|----|-----------|---|---|--------|--------|----|------|-------|---|---------|
| rs7121764   | 11 | 118271759 | G | A | -1.292 | 0.1962 | -- | 0    | 0.129 | 1 | 0.7195  |
| rs10891988  | 11 | 116421056 | C | T | -1.292 | 0.1964 | -? | 0    | 0     | 0 | 1       |
| rs11605788  | 11 | 116232577 | A | C | -1.292 | 0.1965 | -? | 0    | 0     | 0 | 1       |
| rs61901488  | 11 | 117731990 | T | A | 1.292  | 0.1965 | +? | 0    | 0     | 0 | 1       |
| rs11218107  | 11 | 120875634 | C | T | -1.29  | 0.1969 | -? | 0    | 0     | 0 | 1       |
| rs118003247 | 11 | 118834322 | G | A | -1.29  | 0.1969 | -? | 0    | 0     | 0 | 1       |
| rs79237143  | 11 | 120876637 | G | T | -1.29  | 0.1969 | -? | 0    | 0     | 0 | 1       |
| rs10892078  | 11 | 116993929 | T | A | 1.29   | 0.1971 | +? | 0    | 0     | 0 | 1       |
| rs525588    | 11 | 119774225 | C | G | -1.29  | 0.1971 | -? | 0    | 0     | 0 | 1       |
| rs6589689   | 11 | 118622744 | G | A | 1.289  | 0.1973 | ++ | 0    | 0.261 | 1 | 0.6094  |
| rs12805373  | 11 | 119518822 | A | T | -1.289 | 0.1974 | -? | 0    | 0     | 0 | 1       |
| rs73018291  | 11 | 118224123 | A | G | -1.289 | 0.1974 | -? | 0    | 0     | 0 | 1       |
| rs11217129  | 11 | 118902841 | T | C | 1.289  | 0.1975 | +? | 0    | 0     | 0 | 1       |
| rs1815888   | 11 | 119815915 | G | C | -1.288 | 0.1977 | -? | 0    | 0     | 0 | 1       |
| rs7936795   | 11 | 117391736 | G | A | -1.288 | 0.1977 | -? | 0    | 0     | 0 | 1       |
| rs113579428 | 11 | 118006853 | T | C | 1.288  | 0.1978 | +? | 0    | 0     | 0 | 1       |
| rs77074463  | 11 | 118748170 | C | G | -1.288 | 0.1978 | -+ | 16.1 | 3.577 | 1 | 0.05857 |
| rs11217423  | 11 | 119586134 | T | C | -1.287 | 0.1981 | -? | 0    | 0     | 0 | 1       |
| rs12791103  | 11 | 116673315 | T | G | -1.287 | 0.1982 | -+ | 0    | 0.716 | 1 | 0.3976  |
| rs7119568   | 11 | 118723753 | A | T | -1.286 | 0.1985 | -- | 0    | 0.021 | 1 | 0.8838  |
| rs56359135  | 11 | 117569931 | T | A | 1.286  | 0.1986 | +? | 0    | 0     | 0 | 1       |
| rs618523    | 11 | 121061986 | T | C | 1.283  | 0.1994 | +? | 0    | 0     | 0 | 1       |
| rs7943490   | 11 | 120845912 | A | G | -1.283 | 0.1994 | -? | 0    | 0     | 0 | 1       |
| rs11216436  | 11 | 117391374 | A | G | -1.282 | 0.1997 | -? | 0    | 0     | 0 | 1       |
| rs531273    | 11 | 119353755 | A | G | -1.282 | 0.1997 | -? | 0    | 0     | 0 | 1       |
| rs9666861   | 11 | 117829855 | G | A | -1.282 | 0.1997 | -- | 0    | 0     | 1 | 0.9984  |
| rs76429987  | 11 | 120876772 | T | C | -1.282 | 0.1998 | -? | 0    | 0     | 0 | 1       |
| rs111446534 | 11 | 117317947 | A | C | -1.282 | 0.1999 | -? | 0    | 0     | 0 | 1       |
| rs602104    | 11 | 120809383 | C | T | 1.282  | 0.1999 | +? | 0    | 0     | 0 | 1       |
| rs60385993  | 11 | 117316605 | A | G | -1.282 | 0.1999 | -? | 0    | 0     | 0 | 1       |
| rs634838    | 11 | 119354137 | T | C | -1.282 | 0.1999 | -? | 0    | 0     | 0 | 1       |
| rs4935763   | 11 | 121064513 | T | C | 1.282  | 0.2    | +? | 0    | 0     | 0 | 1       |
| rs11217977  | 11 | 120572727 | T | C | -1.28  | 0.2004 | -? | 0    | 0     | 0 | 1       |
| rs74361939  | 11 | 117547710 | A | G | -1.28  | 0.2005 | -? | 0    | 0     | 0 | 1       |
| rs73008675  | 11 | 119742642 | C | T | -1.28  | 0.2006 | -? | 0    | 0     | 0 | 1       |
| rs73008677  | 11 | 119743088 | A | G | -1.28  | 0.2006 | -? | 0    | 0     | 0 | 1       |
| rs73008679  | 11 | 119743230 | T | C | -1.28  | 0.2006 | -? | 0    | 0     | 0 | 1       |
| rs78040959  | 11 | 119324268 | G | A | 1.28   | 0.2006 | +? | 0    | 0     | 0 | 1       |
| rs35310980  | 11 | 119236410 | A | T | 1.28   | 0.2007 | +? | 0    | 0     | 0 | 1       |
| rs3802873   | 11 | 117776471 | T | C | 1.279  | 0.2008 | +? | 0    | 0     | 0 | 1       |
| rs948464    | 11 | 117966185 | G | T | -1.279 | 0.2008 | -? | 0    | 0     | 0 | 1       |
| rs948465    | 11 | 117966178 | G | A | -1.279 | 0.2008 | -? | 0    | 0     | 0 | 1       |
| rs11216093  | 11 | 116557882 | C | A | 1.279  | 0.2009 | +? | 0    | 0     | 0 | 1       |
| rs11217511  | 11 | 119671550 | C | G | 1.279  | 0.201  | +? | 0    | 0     | 0 | 1       |
| rs11605165  | 11 | 119670624 | A | G | 1.279  | 0.201  | +? | 0    | 0     | 0 | 1       |
| rs11824108  | 11 | 116501944 | G | A | -1.279 | 0.201  | -? | 0    | 0     | 0 | 1       |
| rs182928887 | 11 | 117682935 | G | A | 1.278  | 0.2011 | +? | 0    | 0     | 0 | 1       |
| rs35181812  | 11 | 120497465 | T | C | 1.278  | 0.2012 | +? | 0    | 0     | 0 | 1       |
| rs4936593   | 11 | 121064264 | A | G | 1.277  | 0.2017 | +? | 0    | 0     | 0 | 1       |
| rs118170232 | 11 | 121040934 | G | A | -1.276 | 0.202  | -? | 0    | 0     | 0 | 1       |
| rs949056    | 11 | 120779359 | G | A | -1.276 | 0.2021 | -? | 0    | 0     | 0 | 1       |
| rs750059    | 11 | 116202995 | T | G | -1.275 | 0.2022 | -? | 0    | 0     | 0 | 1       |
| rs117164485 | 11 | 116620377 | A | G | -1.275 | 0.2023 | -? | 0    | 0     | 0 | 1       |
| rs595407    | 11 | 118904015 | C | T | 1.275  | 0.2023 | +? | 0    | 0     | 0 | 1       |
| rs11216625  | 11 | 117793989 | A | C | 1.275  | 0.2024 | +? | 0    | 0     | 0 | 1       |
| rs4562840   | 11 | 120834272 | C | G | -1.275 | 0.2024 | -? | 0    | 0     | 0 | 1       |

|              |    |           |   |   |        |        |    |        |       |   |        |
|--------------|----|-----------|---|---|--------|--------|----|--------|-------|---|--------|
| rs3863315    | 11 | 117313231 | C | T | -1.274 | 0.2025 | -? | 0      | 0     | 0 | 1      |
| rs1392314200 | 11 | 119929853 | T | C | 1.273  | 0.2029 | +? | 0      | 0     | 0 | 1      |
| rs10750106   | 11 | 117324964 | T | C | 1.273  | 0.203  | +? | 0      | 0     | 0 | 1      |
| rs1785899    | 11 | 119356682 | T | C | -1.272 | 0.2033 | -? | 0      | 0     | 0 | 1      |
| rs55720349   | 11 | 117796139 | C | T | 1.272  | 0.2034 | +? | 0      | 0     | 0 | 1      |
| rs10790136   | 11 | 116201751 | G | A | -1.271 | 0.2038 | -? | 0      | 0     | 0 | 1      |
| rs641620     | 11 | 117074229 | C | T | 1.271  | 0.2039 | +? | 0      | 0     | 0 | 1      |
| rs10750144   | 11 | 119337504 | A | G | -1.269 | 0.2044 | -? | 0      | 0     | 0 | 1      |
| rs504068     | 11 | 117008946 | T | C | 1.269  | 0.2044 | +? | 0      | 0     | 0 | 1      |
| rs76530395   | 11 | 117899993 | A | G | -1.269 | 0.2045 | -? | 0      | 0     | 0 | 1      |
| rs509565     | 11 | 117120473 | T | C | -1.269 | 0.2046 | -? | 0      | 0     | 0 | 1      |
| rs3016797    | 11 | 117409884 | C | G | -1.268 | 0.2049 | -? | 0      | 0     | 0 | 1      |
| rs520289     | 11 | 117350137 | A | G | -1.267 | 0.2051 | -? | 0      | 0     | 0 | 1      |
| rs6589806    | 11 | 120166817 | C | T | -1.267 | 0.2051 | -? | 0      | 0     | 0 | 1      |
| rs7121294    | 11 | 117845835 | T | C | 1.267  | 0.2051 | +? | 0      | 0     | 0 | 1      |
| rs6589568    | 11 | 116670738 | G | A | -1.267 | 0.2053 | -- | 0      | 0.378 | 1 | 0.5385 |
| rs113447691  | 11 | 119848376 | T | C | -1.266 | 0.2055 | -? | 0      | 0     | 0 | 1      |
| rs56116614   | 11 | 119673271 | G | A | 1.266  | 0.2056 | +? | 0      | 0     | 0 | 1      |
| rs56220026   | 11 | 119673235 | C | G | 1.266  | 0.2056 | +? | 0      | 0     | 0 | 1      |
| rs509728     | 11 | 116533167 | C | G | 1.265  | 0.2057 | +? | 0      | 0     | 0 | 1      |
| rs9651686    | 11 | 117967839 | G | T | -1.265 | 0.2058 | -? | 0      | 0     | 0 | 1      |
| rs115325870  | 11 | 117361165 | T | C | 1.265  | 0.2059 | +? | 0      | 0     | 0 | 1      |
| rs2508450    | 11 | 117863829 | T | C | 1.265  | 0.2059 | ++ | 0      | 0.008 | 1 | 0.927  |
| rs4526780    | 11 | 120730621 | A | G | 1.265  | 0.2059 | +? | 0      | 0     | 0 | 1      |
| rs11216647   | 11 | 117825852 | C | T | -1.264 | 0.2062 | -- | 0      | 0     | 1 | 0.9845 |
| rs2850808    | 11 | 120797604 | A | G | 1.264  | 0.2062 | +? | 0      | 0     | 0 | 1      |
| rs12281464   | 11 | 120576351 | T | A | 1.264  | 0.2063 | +? | 0      | 0     | 0 | 1      |
| rs12294858   | 11 | 120576489 | A | G | 1.264  | 0.2063 | +? | 0      | 0     | 0 | 1      |
| rs4936418    | 11 | 117904049 | T | A | -1.264 | 0.2063 | -? | 0      | 0     | 0 | 1      |
| rs549507     | 11 | 121035618 | T | C | -1.263 | 0.2066 | -? | 0      | 0     | 0 | 1      |
| rs74387077   | 11 | 119669993 | A | G | 1.263  | 0.2067 | +? | 0      | 0     | 0 | 1      |
| rs517918     | 11 | 119771968 | C | T | -1.262 | 0.2068 | -? | 0      | 0     | 0 | 1      |
| rs605805     | 11 | 117949807 | G | A | -1.262 | 0.2068 | -? | 0      | 0     | 0 | 1      |
| rs2847502    | 11 | 120118498 | T | C | -1.262 | 0.2069 | -? | 0      | 0     | 0 | 1      |
| rs1240771    | 11 | 116518889 | G | A | -1.262 | 0.207  | -? | 0      | 0     | 0 | 1      |
| rs12574613   | 11 | 117636729 | T | C | 1.262  | 0.2071 | +? | 0      | 0     | 0 | 1      |
| rs1729407    | 11 | 116677370 | C | G | -1.262 | 0.2071 | -+ | -136.5 | 1.268 | 1 | 0.2601 |
| rs2089648    | 11 | 119512770 | A | G | 1.262  | 0.2071 | +? | 0      | 0     | 0 | 1      |
| rs10892425   | 11 | 119516100 | T | C | 1.261  | 0.2074 | +? | 0      | 0     | 0 | 1      |
| rs11217131   | 11 | 118903589 | G | C | 1.261  | 0.2074 | +? | 0      | 0     | 0 | 1      |
| rs11217369   | 11 | 119515905 | T | C | 1.261  | 0.2074 | +? | 0      | 0     | 0 | 1      |
| rs12788122   | 11 | 121083183 | A | G | 1.26   | 0.2076 | +? | 0      | 0     | 0 | 1      |
| rs580948     | 11 | 119699827 | T | C | 1.26   | 0.2077 | +? | 0      | 0     | 0 | 1      |
| rs10790244   | 11 | 118059557 | C | T | -1.258 | 0.2082 | -+ | -50.4  | 1.994 | 1 | 0.1579 |
| rs6589548    | 11 | 116362136 | G | A | -1.259 | 0.2082 | -? | 0      | 0     | 0 | 1      |
| rs11217984   | 11 | 120576154 | T | C | 1.257  | 0.2086 | +? | 0      | 0     | 0 | 1      |
| rs1599810    | 11 | 118179197 | A | G | 1.257  | 0.2087 | +? | 0      | 0     | 0 | 1      |
| rs3892497    | 11 | 120411267 | A | G | -1.257 | 0.2088 | -? | 0      | 0     | 0 | 1      |
| rs1729405    | 11 | 116678760 | C | T | -1.257 | 0.2089 | -+ | -139.8 | 1.251 | 1 | 0.2634 |
| rs4936525    | 11 | 120470521 | A | C | 1.256  | 0.2091 | +? | 0      | 0     | 0 | 1      |
| rs1815889    | 11 | 119815967 | A | G | -1.256 | 0.2092 | -? | 0      | 0     | 0 | 1      |
| rs653764     | 11 | 117948080 | T | C | -1.256 | 0.2092 | -? | 0      | 0     | 0 | 1      |
| rs73009147   | 11 | 116361536 | T | C | -1.256 | 0.2092 | -? | 0      | 0     | 0 | 1      |
| rs1261672    | 11 | 116518960 | G | A | -1.255 | 0.2093 | -? | 0      | 0     | 0 | 1      |
| rs35857852   | 11 | 117448312 | C | T | 1.255  | 0.2093 | +? | 0      | 0     | 0 | 1      |
| rs10790200   | 11 | 117567949 | C | T | 1.254  | 0.2097 | +? | 0      | 0     | 0 | 1      |

|            |    |           |   |   |        |        |    |       |       |   |        |
|------------|----|-----------|---|---|--------|--------|----|-------|-------|---|--------|
| rs4488208  | 11 | 118877621 | C | G | -1.254 | 0.2097 | -? | 0     | 0     | 0 | 1      |
| rs17119839 | 11 | 116478432 | G | A | -1.254 | 0.2099 | -? | 0     | 0     | 0 | 1      |
| rs534082   | 11 | 116287337 | T | C | -1.254 | 0.21   | -? | 0     | 0     | 0 | 1      |
| rs657389   | 11 | 117670752 | A | G | -1.254 | 0.21   | -? | 0     | 0     | 0 | 1      |
| rs60798124 | 11 | 118282241 | G | A | -1.253 | 0.2101 | -- | 0     | 0.245 | 1 | 0.6209 |
| rs752796   | 11 | 117434983 | G | A | 1.253  | 0.2102 | +  | 0     | 0     | 0 | 1      |
| rs77855139 | 11 | 117455203 | G | A | 1.253  | 0.2102 | +  | 0     | 0     | 0 | 1      |
| rs78466564 | 11 | 117795494 | T | C | 1.253  | 0.2102 | +  | 0     | 0     | 0 | 1      |
| rs10892441 | 11 | 119586418 | T | C | -1.253 | 0.2103 | -? | 0     | 0     | 0 | 1      |
| rs12278852 | 11 | 117934598 | A | G | -1.253 | 0.2103 | -? | 0     | 0     | 0 | 1      |
| rs10892658 | 11 | 120868246 | T | C | 1.252  | 0.2104 | +  | 0     | 0     | 0 | 1      |
| rs626984   | 11 | 119041659 | T | C | 1.252  | 0.2105 | +  | 0     | 0     | 0 | 1      |
| rs10892426 | 11 | 119516473 | T | C | 1.252  | 0.2107 | +  | 0     | 0     | 0 | 1      |
| rs2212358  | 11 | 117914386 | A | G | -1.252 | 0.2107 | -? | 0     | 0     | 0 | 1      |
| rs1784130  | 11 | 116539412 | C | G | -1.251 | 0.2109 | -? | 0     | 0     | 0 | 1      |
| rs12806934 | 11 | 117397482 | T | C | -1.251 | 0.211  | -? | 0     | 0     | 0 | 1      |
| rs634351   | 11 | 119815248 | C | T | -1.251 | 0.211  | -? | 0     | 0     | 0 | 1      |
| rs9666004  | 11 | 121131331 | T | C | 1.25   | 0.2114 | ++ | 0     | 0.27  | 1 | 0.6032 |
| rs11605781 | 11 | 120178632 | C | T | -1.249 | 0.2117 | -? | 0     | 0     | 0 | 1      |
| rs2156120  | 11 | 116557155 | G | A | 1.248  | 0.2119 | +  | 0     | 0     | 0 | 1      |
| rs528147   | 11 | 120036845 | A | G | 1.248  | 0.2119 | +  | 0     | 0     | 0 | 1      |
| rs11217512 | 11 | 119673722 | C | G | 1.248  | 0.212  | +  | 0     | 0     | 0 | 1      |
| rs11217513 | 11 | 119673977 | C | T | 1.248  | 0.212  | +  | 0     | 0     | 0 | 1      |
| rs76070443 | 11 | 119672890 | G | A | 1.248  | 0.212  | +  | 0     | 0     | 0 | 1      |
| rs586370   | 11 | 118816353 | A | G | -1.248 | 0.2121 | -- | 0     | 0.067 | 1 | 0.7951 |
| rs4603339  | 11 | 117656916 | G | A | -1.248 | 0.2122 | -? | 0     | 0     | 0 | 1      |
| rs11216626 | 11 | 117794282 | A | T | 1.247  | 0.2124 | +  | 0     | 0     | 0 | 1      |
| rs45497100 | 11 | 117158168 | T | A | 1.247  | 0.2124 | +  | 0     | 0     | 0 | 1      |
| rs573554   | 11 | 116355860 | C | T | -1.247 | 0.2124 | -? | 0     | 0     | 0 | 1      |
| rs10750146 | 11 | 119341145 | C | T | -1.247 | 0.2125 | -? | 0     | 0     | 0 | 1      |
| rs7105816  | 11 | 117934295 | G | A | -1.247 | 0.2125 | -? | 0     | 0     | 0 | 1      |
| rs9665995  | 11 | 121131224 | T | C | 1.247  | 0.2125 | ++ | 0     | 0.272 | 1 | 0.6019 |
| rs10892620 | 11 | 120587319 | G | A | -1.246 | 0.2127 | -? | 0     | 0     | 0 | 1      |
| rs11216831 | 11 | 118117018 | A | G | 1.246  | 0.2129 | +  | 0     | 0     | 0 | 1      |
| rs2156121  | 11 | 116557142 | A | C | 1.246  | 0.2129 | +  | 0     | 0     | 0 | 1      |
| rs4938399  | 11 | 117398399 | T | C | -1.245 | 0.2133 | -? | 0     | 0     | 0 | 1      |
| rs73008683 | 11 | 119744714 | A | G | -1.245 | 0.2133 | -? | 0     | 0     | 0 | 1      |
| rs9645664  | 11 | 118873987 | C | T | -1.245 | 0.2133 | -- | 0     | 0.088 | 1 | 0.7662 |
| rs1440184  | 11 | 116203460 | A | C | -1.244 | 0.2134 | -? | 0     | 0     | 0 | 1      |
| rs1784104  | 11 | 116551538 | C | T | -1.244 | 0.2136 | -? | 0     | 0     | 0 | 1      |
| rs2846012  | 11 | 116551449 | C | T | -1.244 | 0.2136 | -? | 0     | 0     | 0 | 1      |
| rs11217980 | 11 | 120575997 | A | G | 1.243  | 0.2137 | +  | 0     | 0     | 0 | 1      |
| rs4367952  | 11 | 120475940 | T | C | 1.243  | 0.2137 | +  | 0     | 0     | 0 | 1      |
| rs6589876  | 11 | 121192382 | C | G | 1.243  | 0.2137 | +  | 0     | 0     | 0 | 1      |
| rs11826104 | 11 | 117914627 | T | C | -1.243 | 0.2139 | -? | 0     | 0     | 0 | 1      |
| rs10891987 | 11 | 116417181 | C | G | -1.243 | 0.214  | -? | 0     | 0     | 0 | 1      |
| rs11217664 | 11 | 119929632 | G | A | -1.243 | 0.214  | -? | 0     | 0     | 0 | 1      |
| rs7952568  | 11 | 119672221 | T | C | 1.243  | 0.214  | +  | 0     | 0     | 0 | 1      |
| rs10892689 | 11 | 121088158 | G | A | -1.242 | 0.2141 | -? | 0     | 0     | 0 | 1      |
| rs11216437 | 11 | 117394685 | A | G | -1.242 | 0.2143 | -? | 0     | 0     | 0 | 1      |
| rs609305   | 11 | 119392654 | G | A | -1.242 | 0.2144 | -? | 0     | 0     | 0 | 1      |
| rs7936924  | 11 | 118978319 | C | T | 1.241  | 0.2145 | +  | 0     | 0     | 0 | 1      |
| rs4553405  | 11 | 118061798 | T | C | -1.241 | 0.2146 | -+ | -35.5 | 2.215 | 1 | 0.1367 |
| rs61901382 | 11 | 120581323 | A | G | 1.241  | 0.2146 | +  | 0     | 0     | 0 | 1      |
| rs7944756  | 11 | 120581609 | A | T | 1.241  | 0.2146 | +  | 0     | 0     | 0 | 1      |
| rs56074246 | 11 | 117384450 | C | T | -1.241 | 0.2147 | -? | 0     | 0     | 0 | 1      |

|              |    |           |   |   |        |        |    |   |       |   |        |
|--------------|----|-----------|---|---|--------|--------|----|---|-------|---|--------|
| rs4423192    | 11 | 121128543 | T | C | 1.241  | 0.2148 | ++ | 0 | 0.276 | 1 | 0.5995 |
| rs7113439    | 11 | 119674742 | T | C | 1.241  | 0.2148 | ++ | 0 | 0.089 | 1 | 0.766  |
| rs73014296   | 11 | 118187216 | G | A | -1.24  | 0.2149 | -? | 0 | 0     | 0 | 1      |
| rs4936468    | 11 | 119087122 | A | G | -1.24  | 0.215  | -? | 0 | 0     | 0 | 1      |
| rs4148172    | 11 | 119030759 | G | A | -1.24  | 0.2151 | -? | 0 | 0     | 0 | 1      |
| rs551031     | 11 | 121018725 | C | T | -1.239 | 0.2152 | -? | 0 | 0     | 0 | 1      |
| rs11601887   | 11 | 120932667 | C | T | 1.239  | 0.2155 | +  | 0 | 0     | 0 | 1      |
| rs12802185   | 11 | 121005464 | A | T | -1.239 | 0.2155 | -? | 0 | 0     | 0 | 1      |
| rs1217688880 | 11 | 117845618 | C | T | 1.238  | 0.2156 | +  | 0 | 0     | 0 | 1      |
| rs597670     | 11 | 120824094 | T | C | 1.238  | 0.2156 | +  | 0 | 0     | 0 | 1      |
| rs1939981    | 11 | 117608613 | C | T | -1.238 | 0.2157 | -? | 0 | 0     | 0 | 1      |
| rs4936526    | 11 | 120470867 | A | G | 1.238  | 0.2157 | +  | 0 | 0     | 0 | 1      |
| rs56765654   | 11 | 120177530 | T | C | -1.238 | 0.2157 | -? | 0 | 0     | 0 | 1      |
| rs75432677   | 11 | 120567135 | A | G | -1.238 | 0.2157 | -? | 0 | 0     | 0 | 1      |
| rs72645479   | 11 | 120083118 | C | T | 1.238  | 0.2158 | +  | 0 | 0     | 0 | 1      |
| rs76200167   | 11 | 116307648 | A | C | 1.238  | 0.2158 | +  | 0 | 0     | 0 | 1      |
| rs7929011    | 11 | 116464194 | A | G | 1.238  | 0.2159 | +  | 0 | 0     | 0 | 1      |
| rs480009     | 11 | 116711974 | T | C | -1.236 | 0.2163 | -? | 0 | 0     | 0 | 1      |
| rs10892424   | 11 | 119515046 | T | G | 1.236  | 0.2165 | +  | 0 | 0     | 0 | 1      |
| rs1784132    | 11 | 116539921 | A | G | -1.235 | 0.2168 | -? | 0 | 0     | 0 | 1      |
| rs35412484   | 11 | 116669428 | C | T | 1.235  | 0.2168 | +  | 0 | 0     | 0 | 1      |
| rs59371082   | 11 | 116547745 | G | A | 1.235  | 0.2169 | +  | 0 | 0     | 0 | 1      |
| rs7103821    | 11 | 120435024 | C | A | -1.235 | 0.217  | -? | 0 | 0     | 0 | 1      |
| rs73009144   | 11 | 116356422 | A | G | 1.234  | 0.2171 | +  | 0 | 0     | 0 | 1      |
| rs7932330    | 11 | 116555207 | G | A | 1.234  | 0.2173 | +  | 0 | 0     | 0 | 1      |
| rs4938408    | 11 | 117434629 | A | C | 1.233  | 0.2175 | +  | 0 | 0     | 0 | 1      |
| rs593061     | 11 | 119343329 | G | A | -1.233 | 0.2175 | -? | 0 | 0     | 0 | 1      |
| rs4938469    | 11 | 117911637 | C | T | -1.233 | 0.2177 | -? | 0 | 0     | 0 | 1      |
| rs236916     | 11 | 117089628 | A | G | 1.232  | 0.2178 | +  | 0 | 0     | 0 | 1      |
| rs74954439   | 11 | 116437742 | A | G | -1.231 | 0.2183 | -? | 0 | 0     | 0 | 1      |
| rs2849169    | 11 | 116680448 | A | C | -1.231 | 0.2184 | -? | 0 | 0     | 0 | 1      |
| rs1945764    | 11 | 118182801 | G | A | 1.23   | 0.2187 | +  | 0 | 0     | 0 | 1      |
| rs61898346   | 11 | 120189261 | A | G | -1.23  | 0.2187 | -? | 0 | 0     | 0 | 1      |
| rs12273147   | 11 | 117570395 | A | G | 1.23   | 0.2188 | +  | 0 | 0     | 0 | 1      |
| rs35820582   | 11 | 116470552 | C | G | 1.229  | 0.2189 | +  | 0 | 0     | 0 | 1      |
| rs57156480   | 11 | 118896959 | A | G | -1.229 | 0.2191 | -- | 0 | 0.324 | 1 | 0.5695 |
| rs1784107    | 11 | 116549427 | T | A | -1.229 | 0.2192 | -? | 0 | 0     | 0 | 1      |
| rs7940751    | 11 | 120860425 | T | C | 1.228  | 0.2193 | +  | 0 | 0     | 0 | 1      |
| rs2253134    | 11 | 120411963 | A | C | -1.228 | 0.2195 | -? | 0 | 0     | 0 | 1      |
| rs4938474    | 11 | 117934048 | A | G | -1.228 | 0.2195 | -? | 0 | 0     | 0 | 1      |
| rs12797743   | 11 | 117775198 | G | A | 1.227  | 0.2198 | +  | 0 | 0     | 0 | 1      |
| rs655116     | 11 | 117934704 | C | G | -1.226 | 0.22   | -- | 0 | 0.562 | 1 | 0.4536 |
| rs71480349   | 11 | 117520361 | C | T | 1.227  | 0.22   | ++ | 0 | 0.568 | 1 | 0.4511 |
| rs79136224   | 11 | 117795537 | T | C | 1.227  | 0.22   | +  | 0 | 0     | 0 | 1      |
| rs4271390    | 11 | 119526136 | T | C | -1.226 | 0.2202 | -? | 0 | 0     | 0 | 1      |
| rs2156634    | 11 | 120776001 | G | A | -1.226 | 0.2203 | -? | 0 | 0     | 0 | 1      |
| rs12800036   | 11 | 120871485 | T | C | 1.225  | 0.2205 | +  | 0 | 0     | 0 | 1      |
| rs2850810    | 11 | 120785857 | A | G | -1.225 | 0.2205 | -? | 0 | 0     | 0 | 1      |
| rs750058     | 11 | 116203044 | G | C | -1.225 | 0.2205 | -? | 0 | 0     | 0 | 1      |
| rs11217982   | 11 | 120576090 | A | T | 1.225  | 0.2206 | +  | 0 | 0     | 0 | 1      |
| rs11217983   | 11 | 120576091 | C | T | 1.225  | 0.2206 | +  | 0 | 0     | 0 | 1      |
| rs1440185    | 11 | 116203721 | A | T | -1.224 | 0.2208 | -? | 0 | 0     | 0 | 1      |
| rs12281217   | 11 | 116543514 | T | C | -1.224 | 0.221  | -? | 0 | 0     | 0 | 1      |
| rs632818     | 11 | 119386473 | C | T | -1.224 | 0.221  | -? | 0 | 0     | 0 | 1      |
| rs78264252   | 11 | 117795373 | A | C | 1.224  | 0.2211 | +  | 0 | 0     | 0 | 1      |
| rs893839     | 11 | 116198680 | T | A | -1.224 | 0.2211 | -? | 0 | 0     | 0 | 1      |

|             |    |           |   |   |        |        |    |        |       |   |        |
|-------------|----|-----------|---|---|--------|--------|----|--------|-------|---|--------|
| rs17530451  | 11 | 118031950 | A | C | -1.223 | 0.2215 | -? | 0      | 0     | 0 | 1      |
| rs7928550   | 11 | 120887491 | T | A | -1.223 | 0.2215 | -? | 0      | 0     | 0 | 1      |
| rs10892622  | 11 | 120624486 | G | T | -1.222 | 0.2216 | -? | 0      | 0     | 0 | 1      |
| rs11216629  | 11 | 117794650 | G | C | 1.222  | 0.2216 | +  | 0      | 0     | 0 | 1      |
| rs112732949 | 11 | 116491465 | G | A | -1.222 | 0.2216 | -? | 0      | 0     | 0 | 1      |
| rs7924647   | 11 | 118728479 | G | A | -1.222 | 0.2216 | -- | 0      | 0.016 | 1 | 0.9001 |
| rs4936422   | 11 | 117917156 | C | A | -1.222 | 0.2217 | -? | 0      | 0     | 0 | 1      |
| rs12273341  | 11 | 117931924 | T | C | -1.222 | 0.2218 | -? | 0      | 0     | 0 | 1      |
| rs7122782   | 11 | 117569523 | A | G | 1.222  | 0.2218 | +  | 0      | 0     | 0 | 1      |
| rs733762    | 11 | 119384847 | C | G | -1.221 | 0.2219 | -? | 0      | 0     | 0 | 1      |
| rs11606105  | 11 | 120706014 | T | A | 1.22   | 0.2224 | +  | 0      | 0     | 0 | 1      |
| rs6589622   | 11 | 117646330 | C | T | -1.219 | 0.2227 | -? | 0      | 0     | 0 | 1      |
| rs79517065  | 11 | 117450936 | T | C | 1.219  | 0.2227 | +  | 0      | 0     | 0 | 1      |
| rs625267    | 11 | 117932630 | T | C | -1.219 | 0.223  | -- | 0      | 0.942 | 1 | 0.3319 |
| rs6421572   | 11 | 118977926 | A | C | 1.218  | 0.2232 | +  | 0      | 0     | 0 | 1      |
| rs1787688   | 11 | 116545723 | C | T | 1.218  | 0.2234 | +  | 0      | 0     | 0 | 1      |
| rs643115    | 11 | 119788251 | T | A | 1.218  | 0.2234 | +  | 0      | 0     | 0 | 1      |
| rs6589822   | 11 | 120507564 | G | A | -1.217 | 0.2236 | -? | 0      | 0     | 0 | 1      |
| rs659092    | 11 | 117917962 | C | T | -1.217 | 0.2236 | -? | 0      | 0     | 0 | 1      |
| rs76046563  | 11 | 117795082 | G | C | 1.217  | 0.2237 | +  | 0      | 0     | 0 | 1      |
| rs7123343   | 11 | 120826623 | T | C | -1.216 | 0.2239 | -? | 0      | 0     | 0 | 1      |
| rs10891964  | 11 | 116197173 | G | T | -1.216 | 0.224  | -? | 0      | 0     | 0 | 1      |
| rs2004506   | 11 | 117700588 | A | G | 1.216  | 0.224  | +  | 0      | 0     | 0 | 1      |
| rs56168028  | 11 | 119026384 | G | A | -1.216 | 0.224  | -? | 0      | 0     | 0 | 1      |
| rs12577725  | 11 | 120500339 | T | C | 1.215  | 0.2242 | +  | 0      | 0     | 0 | 1      |
| rs5095      | 11 | 116693163 | G | A | -1.215 | 0.2242 | -? | 0      | 0     | 0 | 1      |
| rs61898761  | 11 | 120342855 | G | A | -1.215 | 0.2242 | -? | 0      | 0     | 0 | 1      |
| rs10892688  | 11 | 121082729 | C | G | -1.215 | 0.2243 | -? | 0      | 0     | 0 | 1      |
| rs1784129   | 11 | 116539233 | A | G | -1.215 | 0.2243 | -? | 0      | 0     | 0 | 1      |
| rs12801338  | 11 | 117714145 | A | G | -1.215 | 0.2245 | -- | 0      | 0.053 | 1 | 0.8174 |
| rs533203    | 11 | 117133219 | T | C | 1.215  | 0.2245 | +  | 0      | 0     | 0 | 1      |
| rs7938067   | 11 | 117924278 | C | T | -1.214 | 0.2247 | -? | 0      | 0     | 0 | 1      |
| rs17124602  | 11 | 120834199 | C | G | 1.214  | 0.2248 | +  | 0      | 0     | 0 | 1      |
| rs652469    | 11 | 117906706 | A | G | 1.214  | 0.2248 | +  | 0      | 0     | 0 | 1      |
| rs11216788  | 11 | 118034201 | A | G | 1.214  | 0.2249 | +  | 0      | 0     | 0 | 1      |
| rs139831408 | 11 | 120473450 | T | C | -1.214 | 0.2249 | -? | 0      | 0     | 0 | 1      |
| rs11216630  | 11 | 117794735 | T | A | 1.213  | 0.2253 | +  | 0      | 0     | 0 | 1      |
| rs61900795  | 11 | 120276903 | C | T | -1.212 | 0.2254 | -? | 0      | 0     | 0 | 1      |
| rs77637745  | 11 | 117795397 | A | C | 1.212  | 0.2254 | +  | 0      | 0     | 0 | 1      |
| rs7945999   | 11 | 117646291 | C | T | -1.212 | 0.2254 | -? | 0      | 0     | 0 | 1      |
| rs1786188   | 11 | 117937131 | A | G | -1.212 | 0.2255 | -- | 0      | 0.761 | 1 | 0.383  |
| rs11216807  | 11 | 118063030 | C | T | -1.212 | 0.2256 | +  | -51.4  | 1.982 | 1 | 0.1592 |
| rs610675    | 11 | 116640094 | A | T | -1.212 | 0.2256 | +  | -96.4  | 1.528 | 1 | 0.2164 |
| rs622604    | 11 | 116640062 | C | T | -1.212 | 0.2256 | +  | -96.4  | 1.528 | 1 | 0.2164 |
| rs623908    | 11 | 116640368 | G | A | -1.212 | 0.2256 | +  | -96.4  | 1.528 | 1 | 0.2164 |
| rs592828    | 11 | 117219305 | C | G | 1.212  | 0.2257 | +  | 0      | 0     | 0 | 1      |
| rs12799825  | 11 | 117448013 | A | C | 1.211  | 0.2258 | +  | 0      | 0     | 0 | 1      |
| rs617357    | 11 | 117899803 | A | G | 1.211  | 0.2258 | +  | -163.1 | 1.14  | 1 | 0.2856 |
| rs10892380  | 11 | 119400052 | A | C | -1.211 | 0.2259 | -? | 0      | 0     | 0 | 1      |
| rs623796    | 11 | 117719316 | T | C | 1.211  | 0.2259 | +  | 0      | 0     | 0 | 1      |
| rs201359394 | 11 | 118536950 | T | A | 1.21   | 0.2263 | ++ | 0      | 0.643 | 1 | 0.4225 |
| rs10892496  | 11 | 119803839 | C | A | -1.209 | 0.2265 | -? | 0      | 0     | 0 | 1      |
| rs595167    | 11 | 119853430 | T | C | 1.209  | 0.2265 | +  | 0      | 0     | 0 | 1      |
| rs61905084  | 11 | 116610294 | C | T | -1.21  | 0.2265 | -- | 0      | 0.197 | 1 | 0.657  |
| rs7125177   | 11 | 121143882 | T | C | 1.209  | 0.2265 | ++ | 0      | 0.295 | 1 | 0.5871 |
| rs11217560  | 11 | 119777403 | G | A | -1.209 | 0.2266 | -? | 0      | 0     | 0 | 1      |

|              |    |           |   |   |        |        |    |   |       |   |        |
|--------------|----|-----------|---|---|--------|--------|----|---|-------|---|--------|
| rs12281614   | 11 | 120583803 | T | C | 1.208  | 0.2269 | +? | 0 | 0     | 0 | 1      |
| rs532150     | 11 | 119353671 | C | T | -1.208 | 0.2269 | -? | 0 | 0     | 0 | 1      |
| rs11218083   | 11 | 120827003 | T | C | -1.208 | 0.227  | -? | 0 | 0     | 0 | 1      |
| rs10892188   | 11 | 117754524 | C | A | 1.208  | 0.2271 | +? | 0 | 0     | 0 | 1      |
| rs1488779268 | 11 | 118964330 | A | G | -1.208 | 0.2271 | -? | 0 | 0     | 0 | 1      |
| rs11217583   | 11 | 119801338 | T | C | -1.207 | 0.2273 | -? | 0 | 0     | 0 | 1      |
| rs117950757  | 11 | 117974397 | A | G | 1.207  | 0.2273 | +? | 0 | 0     | 0 | 1      |
| rs59868549   | 11 | 121113812 | T | A | 1.206  | 0.2277 | ++ | 0 | 0.279 | 1 | 0.5976 |
| rs1815890    | 11 | 119816115 | T | C | -1.206 | 0.2278 | -? | 0 | 0     | 0 | 1      |
| rs7104501    | 11 | 121126386 | T | A | 1.206  | 0.2278 | ++ | 0 | 0.297 | 1 | 0.5858 |
| rs17547832   | 11 | 119344568 | G | A | -1.206 | 0.228  | -? | 0 | 0     | 0 | 1      |
| rs2887176    | 11 | 117312429 | G | A | -1.206 | 0.228  | -? | 0 | 0     | 0 | 1      |
| rs10892495   | 11 | 119803564 | G | C | -1.205 | 0.2281 | -? | 0 | 0     | 0 | 1      |
| rs948379     | 11 | 121120130 | T | C | -1.205 | 0.2281 | -- | 0 | 0.015 | 1 | 0.9029 |
| rs10892010   | 11 | 116536656 | C | A | 1.205  | 0.2282 | +? | 0 | 0     | 0 | 1      |
| rs74526104   | 11 | 117446003 | G | A | 1.205  | 0.2282 | +? | 0 | 0     | 0 | 1      |
| rs10891997   | 11 | 116464675 | G | A | -1.204 | 0.2284 | -? | 0 | 0     | 0 | 1      |
| rs190143695  | 11 | 117938674 | C | A | -1.204 | 0.2284 | -? | 0 | 0     | 0 | 1      |
| rs12295930   | 11 | 121079190 | T | C | -1.204 | 0.2286 | -? | 0 | 0     | 0 | 1      |
| rs2115926    | 11 | 121145524 | A | G | 1.204  | 0.2286 | ++ | 0 | 0.298 | 1 | 0.585  |
| rs4936507    | 11 | 119934563 | A | G | -1.204 | 0.2286 | -? | 0 | 0     | 0 | 1      |
| rs80085590   | 11 | 117795232 | A | G | 1.204  | 0.2287 | +? | 0 | 0     | 0 | 1      |
| rs1787686    | 11 | 116541472 | A | G | 1.203  | 0.2288 | +? | 0 | 0     | 0 | 1      |
| rs4936523    | 11 | 120470159 | C | T | 1.203  | 0.2288 | +? | 0 | 0     | 0 | 1      |
| rs534839     | 11 | 119353388 | C | T | -1.203 | 0.2288 | -? | 0 | 0     | 0 | 1      |
| rs11216026   | 11 | 116464800 | G | A | 1.203  | 0.2289 | +? | 0 | 0     | 0 | 1      |
| rs12286892   | 11 | 119776710 | T | C | -1.203 | 0.2289 | -? | 0 | 0     | 0 | 1      |
| rs12363999   | 11 | 121144114 | T | C | 1.203  | 0.2289 | ++ | 0 | 0.299 | 1 | 0.5847 |
| rs2515798    | 11 | 117819480 | C | A | -1.203 | 0.2289 | -? | 0 | 0     | 0 | 1      |
| rs10790164   | 11 | 116699389 | A | G | 1.203  | 0.229  | +? | 0 | 0     | 0 | 1      |
| rs9667438    | 11 | 117327680 | T | C | 1.203  | 0.2291 | +? | 0 | 0     | 0 | 1      |
| rs11217584   | 11 | 119802832 | A | G | -1.202 | 0.2292 | -? | 0 | 0     | 0 | 1      |
| rs494356     | 11 | 117071970 | T | C | 1.202  | 0.2292 | +? | 0 | 0     | 0 | 1      |
| rs681569     | 11 | 119914616 | A | C | 1.202  | 0.2292 | +? | 0 | 0     | 0 | 1      |
| rs7479331    | 11 | 118829521 | T | G | -1.202 | 0.2292 | -? | 0 | 0     | 0 | 1      |
| rs750056     | 11 | 116202506 | T | C | -1.202 | 0.2292 | -? | 0 | 0     | 0 | 1      |
| rs10892485   | 11 | 119787519 | A | G | -1.202 | 0.2294 | -? | 0 | 0     | 0 | 1      |
| rs12419879   | 11 | 119240757 | T | C | 1.202  | 0.2294 | +? | 0 | 0     | 0 | 1      |
| rs71480312   | 11 | 116554088 | T | C | 1.202  | 0.2294 | +? | 0 | 0     | 0 | 1      |
| rs1941302    | 11 | 121132370 | T | A | 1.202  | 0.2295 | ++ | 0 | 0.3   | 1 | 0.5841 |
| rs7130538    | 11 | 121132553 | T | G | 1.202  | 0.2295 | ++ | 0 | 0.3   | 1 | 0.5841 |
| rs77233977   | 11 | 121057146 | T | C | 1.202  | 0.2295 | ++ | 0 | 0.717 | 1 | 0.3973 |
| rs41467444   | 11 | 119889516 | T | C | -1.201 | 0.2297 | -? | 0 | 0     | 0 | 1      |
| rs11216648   | 11 | 117830429 | G | A | -1.201 | 0.2299 | -- | 0 | 0.012 | 1 | 0.9141 |
| rs9971587    | 11 | 117131286 | A | G | 1.201  | 0.2299 | +? | 0 | 0     | 0 | 1      |
| rs644613     | 11 | 119347715 | T | C | -1.2   | 0.23   | -? | 0 | 0     | 0 | 1      |
| rs7924795    | 11 | 117924263 | T | G | -1.2   | 0.2301 | -? | 0 | 0     | 0 | 1      |
| rs11603672   | 11 | 117563212 | G | A | 1.2    | 0.2302 | +? | 0 | 0     | 0 | 1      |
| rs7105658    | 11 | 118712270 | T | C | -1.199 | 0.2306 | -- | 0 | 0.001 | 1 | 0.9775 |
| rs7114641    | 11 | 117628287 | G | A | -1.199 | 0.2306 | -? | 0 | 0     | 0 | 1      |
| rs17245664   | 11 | 120569528 | A | G | -1.199 | 0.2307 | -? | 0 | 0     | 0 | 1      |
| rs669812     | 11 | 119901422 | T | C | 1.199  | 0.2307 | +? | 0 | 0     | 0 | 1      |
| rs732480     | 11 | 120828827 | A | G | 1.199  | 0.2307 | +? | 0 | 0     | 0 | 1      |
| rs1319166    | 11 | 119942557 | C | G | -1.198 | 0.2308 | -? | 0 | 0     | 0 | 1      |
| rs633683     | 11 | 118504742 | T | C | 1.198  | 0.2308 | ++ | 0 | 0.115 | 1 | 0.734  |
| rs58856586   | 11 | 116366118 | A | G | 1.198  | 0.2309 | +? | 0 | 0     | 0 | 1      |

|              |    |           |   |   |        |        |    |        |       |   |        |
|--------------|----|-----------|---|---|--------|--------|----|--------|-------|---|--------|
| rs4936600    | 11 | 121133458 | C | T | 1.198  | 0.231  | ++ | 0      | 0.302 | 1 | 0.5826 |
| rs474201     | 11 | 118958229 | G | A | 1.198  | 0.2311 | +? | 0      | 0     | 0 | 1      |
| rs4936415    | 11 | 117875313 | C | G | -1.197 | 0.2311 | -+ | 0      | 0.685 | 1 | 0.4077 |
| rs117920151  | 11 | 116759706 | C | G | 1.197  | 0.2312 | +? | 0      | 0     | 0 | 1      |
| rs4403813    | 11 | 119816331 | C | T | -1.197 | 0.2312 | -? | 0      | 0     | 0 | 1      |
| rs56895810   | 11 | 119934071 | A | C | -1.197 | 0.2314 | -? | 0      | 0     | 0 | 1      |
| rs7122510    | 11 | 118708785 | A | C | -1.197 | 0.2314 | -- | 0      | 0.046 | 1 | 0.8307 |
| rs12276440   | 11 | 120575481 | T | C | 1.197  | 0.2315 | +? | 0      | 0     | 0 | 1      |
| rs1263164    | 11 | 116675291 | C | A | -1.197 | 0.2315 | -? | 0      | 0     | 0 | 1      |
| rs6589651    | 11 | 118058156 | G | A | -1.196 | 0.2316 | -+ | -72    | 1.745 | 1 | 0.1866 |
| rs139447106  | 11 | 116737302 | T | C | -1.195 | 0.2319 | -? | 0      | 0     | 0 | 1      |
| rs4938758    | 11 | 119892030 | T | C | -1.195 | 0.2319 | -? | 0      | 0     | 0 | 1      |
| rs55644928   | 11 | 117303430 | T | C | -1.195 | 0.2319 | -? | 0      | 0     | 0 | 1      |
| rs11217579   | 11 | 119798293 | T | A | -1.195 | 0.232  | -? | 0      | 0     | 0 | 1      |
| rs34616770   | 11 | 120279132 | C | G | 1.195  | 0.2322 | ++ | 0      | 0.927 | 1 | 0.3358 |
| rs503175     | 11 | 119753926 | C | T | -1.195 | 0.2322 | -? | 0      | 0     | 0 | 1      |
| rs893837     | 11 | 116198048 | C | T | -1.194 | 0.2323 | -? | 0      | 0     | 0 | 1      |
| rs7122511    | 11 | 118708786 | A | C | -1.194 | 0.2324 | -- | 0      | 0.044 | 1 | 0.8344 |
| rs10892135   | 11 | 117392826 | A | G | -1.194 | 0.2325 | -? | 0      | 0     | 0 | 1      |
| rs540469     | 11 | 117346513 | C | T | 1.194  | 0.2325 | +? | 0      | 0     | 0 | 1      |
| rs10892645   | 11 | 120794509 | G | A | 1.193  | 0.2327 | +? | 0      | 0     | 0 | 1      |
| rs1170855838 | 11 | 119889758 | T | C | 1.193  | 0.2327 | +? | 0      | 0     | 0 | 1      |
| rs7103366    | 11 | 118057867 | G | T | -1.193 | 0.2327 | -+ | -72.4  | 1.74  | 1 | 0.1871 |
| rs554422     | 11 | 119778270 | T | C | -1.193 | 0.233  | -? | 0      | 0     | 0 | 1      |
| rs1145211    | 11 | 116557216 | A | C | 1.192  | 0.2331 | +? | 0      | 0     | 0 | 1      |
| rs752795     | 11 | 117434985 | G | C | 1.192  | 0.2331 | +? | 0      | 0     | 0 | 1      |
| rs12270409   | 11 | 120568566 | C | T | 1.192  | 0.2332 | +? | 0      | 0     | 0 | 1      |
| rs11217783   | 11 | 120151510 | T | A | -1.192 | 0.2333 | -? | 0      | 0     | 0 | 1      |
| rs1786190    | 11 | 117946720 | G | A | -1.191 | 0.2335 | -? | 0      | 0     | 0 | 1      |
| rs604411     | 11 | 117946386 | T | C | -1.191 | 0.2335 | -? | 0      | 0     | 0 | 1      |
| rs647593     | 11 | 117461576 | C | T | -1.191 | 0.2335 | -? | 0      | 0     | 0 | 1      |
| rs9630199    | 11 | 120575671 | C | T | 1.191  | 0.2338 | +? | 0      | 0     | 0 | 1      |
| rs2542062    | 11 | 116680449 | A | G | -1.19  | 0.2339 | -? | 0      | 0     | 0 | 1      |
| rs80062985   | 11 | 119817324 | T | C | -1.19  | 0.2339 | -? | 0      | 0     | 0 | 1      |
| rs10892695   | 11 | 121112943 | G | T | -1.19  | 0.234  | -- | -112.7 | 1.41  | 1 | 0.235  |
| rs580119     | 11 | 117216213 | G | T | 1.19   | 0.234  | +? | 0      | 0     | 0 | 1      |
| rs577975     | 11 | 116722910 | C | T | -1.19  | 0.2341 | -? | 0      | 0     | 0 | 1      |
| rs10219396   | 11 | 117927766 | A | G | -1.189 | 0.2345 | -? | 0      | 0     | 0 | 1      |
| rs11218115   | 11 | 120893187 | A | C | -1.189 | 0.2346 | -? | 0      | 0     | 0 | 1      |
| rs589348     | 11 | 119797699 | T | C | 1.188  | 0.2348 | +? | 0      | 0     | 0 | 1      |
| rs610775     | 11 | 117124696 | A | G | 1.188  | 0.2348 | +? | 0      | 0     | 0 | 1      |
| rs7103918    | 11 | 118061480 | T | C | -1.188 | 0.2349 | -+ | -51.2  | 1.984 | 1 | 0.159  |
| rs138897098  | 11 | 117599488 | C | T | 1.187  | 0.2351 | +? | 0      | 0     | 0 | 1      |
| rs17588728   | 11 | 117604604 | T | C | 1.187  | 0.2351 | +? | 0      | 0     | 0 | 1      |
| rs948377     | 11 | 121120917 | T | C | -1.186 | 0.2354 | -- | 0      | 0.012 | 1 | 0.9114 |
| rs10790166   | 11 | 116779499 | G | A | -1.186 | 0.2358 | -? | 0      | 0     | 0 | 1      |
| rs12275681   | 11 | 120173845 | G | A | -1.186 | 0.2358 | -? | 0      | 0     | 0 | 1      |
| rs12364606   | 11 | 117680787 | T | C | -1.185 | 0.2359 | -? | 0      | 0     | 0 | 1      |
| rs11217981   | 11 | 120576039 | A | G | 1.185  | 0.2362 | +? | 0      | 0     | 0 | 1      |
| rs36195057   | 11 | 116542247 | A | G | 1.185  | 0.2362 | +? | 0      | 0     | 0 | 1      |
| rs7101905    | 11 | 119844937 | T | C | -1.185 | 0.2362 | -? | 0      | 0     | 0 | 1      |
| rs9630200    | 11 | 120575845 | A | G | 1.185  | 0.2362 | +? | 0      | 0     | 0 | 1      |
| rs575280     | 11 | 116527728 | G | A | -1.184 | 0.2366 | -? | 0      | 0     | 0 | 1      |
| rs11821451   | 11 | 117312301 | A | G | -1.183 | 0.2368 | -? | 0      | 0     | 0 | 1      |
| rs642896     | 11 | 119353666 | G | A | -1.183 | 0.2368 | -? | 0      | 0     | 0 | 1      |
| rs7120765    | 11 | 121122021 | A | G | -1.183 | 0.2368 | -- | 0      | 0.012 | 1 | 0.9129 |

|             |    |           |   |   |        |        |    |   |       |   |        |
|-------------|----|-----------|---|---|--------|--------|----|---|-------|---|--------|
| rs75195166  | 11 | 117795189 | A | G | 1.183  | 0.2369 | +  | 0 | 0     | 0 | 1      |
| rs7928669   | 11 | 121121448 | T | C | -1.183 | 0.2369 | -- | 0 | 0.012 | 1 | 0.9131 |
| rs536141    | 11 | 117104536 | A | C | 1.183  | 0.237  | +  | 0 | 0     | 0 | 1      |
| rs74365486  | 11 | 116482449 | A | C | -1.183 | 0.237  | -  | 0 | 0     | 0 | 1      |
| rs77964702  | 11 | 117391421 | A | G | 1.182  | 0.2371 | +  | 0 | 0     | 0 | 1      |
| rs34994677  | 11 | 116472577 | G | A | 1.182  | 0.2372 | +  | 0 | 0     | 0 | 1      |
| rs487298    | 11 | 117205844 | T | G | 1.182  | 0.2372 | +  | 0 | 0     | 0 | 1      |
| rs55966937  | 11 | 120705938 | G | A | 1.182  | 0.2372 | +  | 0 | 0     | 0 | 1      |
| rs601842    | 11 | 119350396 | C | T | -1.182 | 0.2372 | -  | 0 | 0     | 0 | 1      |
| rs11217917  | 11 | 120441767 | G | C | 1.181  | 0.2375 | +  | 0 | 0     | 0 | 1      |
| rs594603    | 11 | 117923079 | T | C | -1.181 | 0.2375 | -  | 0 | 0     | 0 | 1      |
| rs4938467   | 11 | 117875171 | T | C | -1.181 | 0.2378 | +  | 0 | 0.67  | 1 | 0.4132 |
| rs7105395   | 11 | 120152148 | T | C | 1.18   | 0.2379 | +  | 0 | 0     | 0 | 1      |
| rs611719    | 11 | 119349454 | A | G | -1.18  | 0.2381 | -  | 0 | 0     | 0 | 1      |
| rs1893817   | 11 | 120824400 | T | C | 1.179  | 0.2382 | +  | 0 | 0     | 0 | 1      |
| rs714053    | 11 | 117946138 | T | C | 1.179  | 0.2383 | ++ | 0 | 0.025 | 1 | 0.8746 |
| rs906540    | 11 | 116440439 | A | T | -1.179 | 0.2384 | -  | 0 | 0     | 0 | 1      |
| rs948102    | 11 | 117656310 | A | G | -1.179 | 0.2384 | -  | 0 | 0     | 0 | 1      |
| rs2845696   | 11 | 117947103 | G | A | -1.179 | 0.2385 | -  | 0 | 0     | 0 | 1      |
| rs1240660   | 11 | 116493738 | G | A | 1.178  | 0.2387 | +  | 0 | 0     | 0 | 1      |
| rs11216736  | 11 | 117944485 | C | T | 1.178  | 0.2389 | ++ | 0 | 0.098 | 1 | 0.7548 |
| rs576190    | 11 | 117205766 | C | T | 1.177  | 0.2391 | +  | 0 | 0     | 0 | 1      |
| rs7117594   | 11 | 118714492 | T | C | -1.177 | 0.2391 | -- | 0 | 0.005 | 1 | 0.9462 |
| rs11217854  | 11 | 120267537 | G | A | 1.177  | 0.2392 | ++ | 0 | 0.946 | 1 | 0.3307 |
| rs609530    | 11 | 119349933 | T | C | -1.177 | 0.2392 | -  | 0 | 0     | 0 | 1      |
| rs2075295   | 11 | 116628401 | C | T | -1.176 | 0.2395 | -- | 0 | 0.45  | 1 | 0.5021 |
| rs12364363  | 11 | 119500880 | C | T | -1.176 | 0.2396 | -  | 0 | 0     | 0 | 1      |
| rs11217865  | 11 | 120300327 | C | A | -1.175 | 0.2398 | -  | 0 | 0     | 0 | 1      |
| rs61898763  | 11 | 120343650 | T | C | -1.175 | 0.2398 | -  | 0 | 0     | 0 | 1      |
| rs74391474  | 11 | 117795283 | C | G | 1.175  | 0.2398 | +  | 0 | 0     | 0 | 1      |
| rs74578710  | 11 | 117795285 | A | G | 1.175  | 0.2398 | +  | 0 | 0     | 0 | 1      |
| rs1011664   | 11 | 119796458 | G | C | -1.175 | 0.24   | -  | 0 | 0     | 0 | 1      |
| rs4938738   | 11 | 119778544 | T | G | -1.175 | 0.24   | -  | 0 | 0     | 0 | 1      |
| rs145076512 | 11 | 117466661 | G | T | 1.174  | 0.2403 | +  | 0 | 0     | 0 | 1      |
| rs12361791  | 11 | 118100176 | G | T | 1.174  | 0.2404 | +  | 0 | 0     | 0 | 1      |
| rs7106859   | 11 | 121125452 | A | C | 1.174  | 0.2404 | ++ | 0 | 0.315 | 1 | 0.5745 |
| rs10219389  | 11 | 119520783 | C | A | -1.174 | 0.2405 | -  | 0 | 0     | 0 | 1      |
| rs7102869   | 11 | 120580623 | T | C | 1.174  | 0.2405 | +  | 0 | 0     | 0 | 1      |
| rs638405    | 11 | 117163824 | G | C | 1.173  | 0.2407 | +  | 0 | 0     | 0 | 1      |
| rs11216020  | 11 | 116452961 | C | G | -1.173 | 0.2408 | -  | 0 | 0     | 0 | 1      |
| rs77259443  | 11 | 117474492 | G | A | 1.173  | 0.2409 | +  | 0 | 0     | 0 | 1      |
| rs906827    | 11 | 119514129 | A | C | 1.173  | 0.2409 | +  | 0 | 0     | 0 | 1      |
| rs596770    | 11 | 119773548 | G | A | -1.172 | 0.241  | -  | 0 | 0     | 0 | 1      |
| rs662646    | 11 | 119345979 | T | C | -1.172 | 0.2411 | -  | 0 | 0     | 0 | 1      |
| rs7130866   | 11 | 119636942 | G | A | 1.172  | 0.2413 | ++ | 0 | 0.123 | 1 | 0.7256 |
| rs7121490   | 11 | 120152147 | C | T | 1.171  | 0.2414 | +  | 0 | 0     | 0 | 1      |
| rs10892628  | 11 | 120707383 | A | G | 1.171  | 0.2415 | +  | 0 | 0     | 0 | 1      |
| rs12785765  | 11 | 120890960 | C | A | -1.171 | 0.2415 | -  | 0 | 0     | 0 | 1      |
| rs7928488   | 11 | 116203828 | T | C | -1.171 | 0.2415 | -  | 0 | 0     | 0 | 1      |
| rs11217928  | 11 | 120495969 | T | C | 1.171  | 0.2416 | +  | 0 | 0     | 0 | 1      |
| rs500787    | 11 | 117725333 | T | C | 1.171  | 0.2417 | +  | 0 | 0     | 0 | 1      |
| rs11822909  | 11 | 119520995 | T | C | -1.17  | 0.2418 | -  | 0 | 0     | 0 | 1      |
| rs1320721   | 11 | 120466336 | C | G | 1.17   | 0.2419 | +  | 0 | 0     | 0 | 1      |
| rs4938815   | 11 | 120441647 | G | T | 1.17   | 0.2419 | +  | 0 | 0     | 0 | 1      |
| rs11825297  | 11 | 117642376 | T | C | -1.17  | 0.242  | -  | 0 | 0     | 0 | 1      |
| rs881517    | 11 | 116370871 | T | G | 1.17   | 0.242  | +  | 0 | 0     | 0 | 1      |

|              |    |           |   |   |        |        |    |        |       |   |        |
|--------------|----|-----------|---|---|--------|--------|----|--------|-------|---|--------|
| rs12291772   | 11 | 121076227 | A | G | -1.17  | 0.2421 | -? | 0      | 0     | 0 | 1      |
| rs55973262   | 11 | 117566305 | C | G | 1.17   | 0.2421 | +  | 0      | 0     | 0 | 1      |
| rs56406822   | 11 | 120219546 | A | G | 1.17   | 0.2421 | ++ | 0      | 0.95  | 1 | 0.3296 |
| rs624882     | 11 | 119386445 | T | C | -1.17  | 0.2422 | -? | 0      | 0     | 0 | 1      |
| rs112885596  | 11 | 120833690 | C | T | -1.169 | 0.2423 | -? | 0      | 0     | 0 | 1      |
| rs2155387    | 11 | 117654176 | A | C | -1.169 | 0.2423 | -? | 0      | 0     | 0 | 1      |
| rs11217548   | 11 | 119742803 | T | C | -1.169 | 0.2425 | -? | 0      | 0     | 0 | 1      |
| rs11217562   | 11 | 119777416 | T | C | -1.168 | 0.2427 | -? | 0      | 0     | 0 | 1      |
| rs11217148   | 11 | 118957735 | T | G | 1.168  | 0.2429 | +  | 0      | 0     | 0 | 1      |
| rs11607987   | 11 | 119856928 | T | C | -1.168 | 0.2429 | -? | 0      | 0     | 0 | 1      |
| rs7947506    | 11 | 116359612 | T | C | -1.168 | 0.2429 | -? | 0      | 0     | 0 | 1      |
| rs2305826    | 11 | 117241760 | T | A | 1.167  | 0.2432 | +  | 0      | 0     | 0 | 1      |
| rs80072373   | 11 | 116485420 | G | C | -1.167 | 0.2432 | -? | 0      | 0     | 0 | 1      |
| rs147634995  | 11 | 120067199 | A | C | 1.167  | 0.2434 | +  | 0      | 0     | 0 | 1      |
| rs76785396   | 11 | 119702716 | A | T | 1.167  | 0.2434 | +  | 0      | 0     | 0 | 1      |
| rs7927356    | 11 | 120950632 | C | T | -1.167 | 0.2434 | -? | 0      | 0     | 0 | 1      |
| rs7940619    | 11 | 120950521 | A | G | -1.167 | 0.2434 | -? | 0      | 0     | 0 | 1      |
| rs77586292   | 11 | 116821525 | T | C | -1.166 | 0.2435 | -? | 0      | 0     | 0 | 1      |
| rs77963671   | 11 | 116434951 | T | C | -1.166 | 0.2435 | -? | 0      | 0     | 0 | 1      |
| rs1790469    | 11 | 119930569 | A | G | 1.166  | 0.2437 | +  | 0      | 0     | 0 | 1      |
| rs559430     | 11 | 119775597 | C | T | -1.166 | 0.2437 | -? | 0      | 0     | 0 | 1      |
| rs11218139   | 11 | 120959225 | G | A | -1.166 | 0.2438 | -? | 0      | 0     | 0 | 1      |
| rs4938397    | 11 | 117392337 | T | G | -1.166 | 0.2438 | -? | 0      | 0     | 0 | 1      |
| rs2511050    | 11 | 117338912 | A | G | 1.165  | 0.244  | +  | 0      | 0     | 0 | 1      |
| rs4936564    | 11 | 120800376 | A | G | -1.165 | 0.2442 | -+ | -182.9 | 1.06  | 1 | 0.3031 |
| rs12796185   | 11 | 120446830 | C | T | 1.164  | 0.2443 | +  | 0      | 0     | 0 | 1      |
| rs10892429   | 11 | 119548052 | A | G | 1.164  | 0.2444 | +  | 0      | 0     | 0 | 1      |
| rs487827     | 11 | 119772922 | T | G | -1.164 | 0.2445 | -? | 0      | 0     | 0 | 1      |
| rs494606     | 11 | 116714118 | G | T | -1.164 | 0.2445 | -? | 0      | 0     | 0 | 1      |
| rs115894834  | 11 | 117347073 | G | A | -1.164 | 0.2446 | -? | 0      | 0     | 0 | 1      |
| rs61902685   | 11 | 120566146 | C | T | 1.164  | 0.2446 | +  | 0      | 0     | 0 | 1      |
| rs77346757   | 11 | 117347029 | A | G | -1.164 | 0.2446 | -? | 0      | 0     | 0 | 1      |
| rs685540     | 11 | 117908079 | C | G | -1.163 | 0.2449 | -- | -188.5 | 1.04  | 1 | 0.3078 |
| rs10892635   | 11 | 120759130 | A | G | -1.162 | 0.2451 | -? | 0      | 0     | 0 | 1      |
| rs539858     | 11 | 116729013 | C | T | -1.162 | 0.2453 | -? | 0      | 0     | 0 | 1      |
| rs10892421   | 11 | 119498403 | C | T | -1.161 | 0.2455 | -? | 0      | 0     | 0 | 1      |
| rs527347     | 11 | 117203633 | G | A | 1.161  | 0.2456 | +  | 0      | 0     | 0 | 1      |
| rs61898358   | 11 | 120222480 | A | G | -1.161 | 0.2457 | -? | 0      | 0     | 0 | 1      |
| rs508479     | 11 | 119775811 | A | C | -1.16  | 0.2459 | -? | 0      | 0     | 0 | 1      |
| rs7942167    | 11 | 121121501 | G | A | -1.16  | 0.246  | -- | 0      | 0.009 | 1 | 0.9233 |
| rs4373935    | 11 | 120273301 | G | A | -1.159 | 0.2463 | -? | 0      | 0     | 0 | 1      |
| rs474867     | 11 | 120808714 | A | G | 1.159  | 0.2463 | +  | 0      | 0     | 0 | 1      |
| rs10892074   | 11 | 116980641 | T | G | 1.159  | 0.2466 | +  | 0      | 0     | 0 | 1      |
| rs11217515   | 11 | 119674099 | C | T | 1.159  | 0.2466 | +  | 0      | 0     | 0 | 1      |
| rs116904534  | 11 | 117554617 | G | A | -1.159 | 0.2466 | -? | 0      | 0     | 0 | 1      |
| rs11216785   | 11 | 118030633 | A | G | 1.158  | 0.2467 | +  | 0      | 0     | 0 | 1      |
| rs4537767    | 11 | 120273686 | G | A | -1.158 | 0.2468 | -? | 0      | 0     | 0 | 1      |
| rs67617613   | 11 | 120331916 | C | A | -1.158 | 0.247  | -? | 0      | 0     | 0 | 1      |
| rs10892422   | 11 | 119498748 | G | A | -1.157 | 0.2472 | -? | 0      | 0     | 0 | 1      |
| rs1448722646 | 11 | 120018127 | T | C | 1.157  | 0.2473 | +  | 0      | 0     | 0 | 1      |
| rs3016357    | 11 | 116555415 | T | C | 1.157  | 0.2473 | +  | 0      | 0     | 0 | 1      |
| rs10892381   | 11 | 119400817 | C | T | -1.157 | 0.2474 | -? | 0      | 0     | 0 | 1      |
| rs1893818    | 11 | 120819939 | G | A | 1.157  | 0.2474 | +  | 0      | 0     | 0 | 1      |
| rs1940039    | 11 | 117393102 | T | C | -1.157 | 0.2474 | -? | 0      | 0     | 0 | 1      |
| rs73024419   | 11 | 117801857 | T | C | 1.157  | 0.2474 | +  | 0      | 0     | 0 | 1      |
| rs76663629   | 11 | 120826260 | A | G | -1.157 | 0.2474 | -? | 0      | 0     | 0 | 1      |

|              |    |           |   |   |        |        |    |        |       |   |        |
|--------------|----|-----------|---|---|--------|--------|----|--------|-------|---|--------|
| rs686624     | 11 | 118955509 | T | A | -1.156 | 0.2476 | -? | 0      | 0     | 0 | 1      |
| rs7948072    | 11 | 117312197 | G | A | -1.156 | 0.2478 | -? | 0      | 0     | 0 | 1      |
| rs12225735   | 11 | 120800039 | T | C | -1.155 | 0.2479 | -+ | -185.9 | 1.049 | 1 | 0.3056 |
| rs611279     | 11 | 119349531 | A | G | -1.155 | 0.2479 | -? | 0      | 0     | 0 | 1      |
| rs77810230   | 11 | 120170012 | C | T | -1.155 | 0.2479 | -? | 0      | 0     | 0 | 1      |
| rs112266857  | 11 | 117564845 | T | C | 1.155  | 0.248  | +? | 0      | 0     | 0 | 1      |
| rs528056     | 11 | 118317907 | T | C | 1.155  | 0.2481 | +- | 0      | 0.459 | 1 | 0.4983 |
| rs641896     | 11 | 119775435 | T | C | -1.155 | 0.2481 | -? | 0      | 0     | 0 | 1      |
| rs512443     | 11 | 117339893 | T | C | 1.155  | 0.2482 | +? | 0      | 0     | 0 | 1      |
| rs11607580   | 11 | 120713605 | G | A | 1.154  | 0.2483 | +? | 0      | 0     | 0 | 1      |
| rs6589541    | 11 | 116208396 | G | A | -1.154 | 0.2483 | -? | 0      | 0     | 0 | 1      |
| rs611616     | 11 | 119349526 | A | G | -1.154 | 0.2486 | -? | 0      | 0     | 0 | 1      |
| rs11608113   | 11 | 120714220 | G | A | 1.154  | 0.2487 | +? | 0      | 0     | 0 | 1      |
| rs512481     | 11 | 117718880 | A | G | 1.153  | 0.2488 | +? | 0      | 0     | 0 | 1      |
| rs519294     | 11 | 118573743 | A | C | 1.153  | 0.2488 | ++ | -148.4 | 1.208 | 1 | 0.2718 |
| rs4643089    | 11 | 120941583 | G | A | -1.153 | 0.2489 | -? | 0      | 0     | 0 | 1      |
| rs148838027  | 11 | 118290459 | C | G | -1.153 | 0.249  | -- | 0      | 0.354 | 1 | 0.5517 |
| rs1317586    | 11 | 119881176 | G | A | 1.153  | 0.2491 | +? | 0      | 0     | 0 | 1      |
| rs9666435    | 11 | 120310978 | C | A | -1.153 | 0.2491 | -? | 0      | 0     | 0 | 1      |
| rs116997303  | 11 | 117447871 | C | T | 1.152  | 0.2492 | +? | 0      | 0     | 0 | 1      |
| rs142639145  | 11 | 117447735 | G | A | 1.152  | 0.2492 | +? | 0      | 0     | 0 | 1      |
| rs7108596    | 11 | 120310959 | A | G | -1.152 | 0.2492 | -? | 0      | 0     | 0 | 1      |
| rs7948299    | 11 | 120316589 | C | T | -1.152 | 0.2492 | -? | 0      | 0     | 0 | 1      |
| rs1729410    | 11 | 116665661 | C | G | -1.152 | 0.2494 | -+ | -67.7  | 1.789 | 1 | 0.181  |
| rs61902688   | 11 | 120567441 | A | C | 1.152  | 0.2494 | +? | 0      | 0     | 0 | 1      |
| rs12279833   | 11 | 121119605 | C | T | -1.152 | 0.2495 | -- | 0      | 0.008 | 1 | 0.9273 |
| rs1614444    | 11 | 116547548 | G | A | -1.151 | 0.2498 | -? | 0      | 0     | 0 | 1      |
| rs112845302  | 11 | 117570168 | A | G | 1.15   | 0.2502 | +? | 0      | 0     | 0 | 1      |
| rs1482502236 | 11 | 116528047 | A | T | 1.15   | 0.2502 | +? | 0      | 0     | 0 | 1      |
| rs10892655   | 11 | 120838878 | A | G | -1.149 | 0.2505 | -? | 0      | 0     | 0 | 1      |
| rs112793334  | 11 | 117429793 | A | C | 1.149  | 0.2506 | +? | 0      | 0     | 0 | 1      |
| rs4144286    | 11 | 121126349 | A | G | 1.149  | 0.2506 | ++ | 0      | 0.334 | 1 | 0.5635 |
| rs4382920    | 11 | 121115877 | G | C | -1.148 | 0.2508 | -? | 0      | 0     | 0 | 1      |
| rs1002179    | 11 | 119344407 | C | T | -1.148 | 0.2509 | -? | 0      | 0     | 0 | 1      |
| rs10502236   | 11 | 120307742 | G | A | -1.148 | 0.2509 | -? | 0      | 0     | 0 | 1      |
| rs57912596   | 11 | 120306759 | C | T | -1.148 | 0.2509 | -? | 0      | 0     | 0 | 1      |
| rs4572163    | 11 | 117661200 | T | C | 1.148  | 0.2511 | +? | 0      | 0     | 0 | 1      |
| rs10750098   | 11 | 116705568 | G | T | 1.147  | 0.2512 | +? | 0      | 0     | 0 | 1      |
| rs145518466  | 11 | 117633482 | G | A | -1.147 | 0.2512 | -? | 0      | 0     | 0 | 1      |
| rs73587425   | 11 | 117633690 | C | G | -1.147 | 0.2512 | -? | 0      | 0     | 0 | 1      |
| rs12363974   | 11 | 120277388 | G | C | -1.147 | 0.2513 | -? | 0      | 0     | 0 | 1      |
| rs582343     | 11 | 119772693 | C | G | -1.146 | 0.2516 | -? | 0      | 0     | 0 | 1      |
| rs17245518   | 11 | 120327817 | C | T | -1.146 | 0.2517 | -? | 0      | 0     | 0 | 1      |
| rs587521     | 11 | 119351220 | G | A | -1.146 | 0.2519 | -? | 0      | 0     | 0 | 1      |
| rs635335     | 11 | 119917798 | T | C | 1.146  | 0.2519 | +? | 0      | 0     | 0 | 1      |
| rs1784042    | 11 | 117065476 | A | G | 1.146  | 0.252  | +? | 0      | 0     | 0 | 1      |
| rs505128     | 11 | 116273511 | C | T | -1.145 | 0.2521 | -? | 0      | 0     | 0 | 1      |
| rs619360     | 11 | 117168402 | T | A | 1.145  | 0.2521 | +? | 0      | 0     | 0 | 1      |
| rs4936522    | 11 | 120469504 | G | C | 1.145  | 0.2522 | +? | 0      | 0     | 0 | 1      |
| rs117839774  | 11 | 120585311 | T | C | 1.145  | 0.2523 | +? | 0      | 0     | 0 | 1      |
| rs75707401   | 11 | 117560438 | A | G | 1.144  | 0.2525 | +? | 0      | 0     | 0 | 1      |
| rs583219     | 11 | 116723171 | C | T | -1.144 | 0.2526 | -? | 0      | 0     | 0 | 1      |
| rs4938412    | 11 | 117463436 | T | G | 1.144  | 0.2528 | +? | 0      | 0     | 0 | 1      |
| rs654776     | 11 | 119346737 | A | G | -1.144 | 0.2528 | -? | 0      | 0     | 0 | 1      |
| rs76630213   | 11 | 117466663 | G | T | 1.144  | 0.2528 | +? | 0      | 0     | 0 | 1      |
| rs10892579   | 11 | 120330728 | G | A | -1.143 | 0.253  | -? | 0      | 0     | 0 | 1      |

|             |    |           |   |   |        |        |    |        |       |   |        |
|-------------|----|-----------|---|---|--------|--------|----|--------|-------|---|--------|
| rs12788462  | 11 | 120151784 | C | T | -1.143 | 0.253  | -? | 0      | 0     | 0 | 1      |
| rs10790434  | 11 | 121191782 | G | C | 1.143  | 0.2531 | +? | 0      | 0     | 0 | 1      |
| rs138450618 | 11 | 117775903 | T | C | -1.143 | 0.2531 | -? | 0      | 0     | 0 | 1      |
| rs3901422   | 11 | 118837272 | A | G | -1.143 | 0.2531 | -? | 0      | 0     | 0 | 1      |
| rs529681    | 11 | 120042082 | A | G | 1.143  | 0.2531 | +? | 0      | 0     | 0 | 1      |
| rs11600723  | 11 | 120249395 | T | C | -1.142 | 0.2533 | -? | 0      | 0     | 0 | 1      |
| rs11216624  | 11 | 117792471 | A | G | -1.142 | 0.2534 | -? | 0      | 0     | 0 | 1      |
| rs4245039   | 11 | 120485547 | C | A | 1.141  | 0.2537 | +? | 0      | 0     | 0 | 1      |
| rs12361642  | 11 | 120266477 | T | C | -1.141 | 0.2538 | -? | 0      | 0     | 0 | 1      |
| rs12363073  | 11 | 117352086 | T | C | 1.141  | 0.2538 | +? | 0      | 0     | 0 | 1      |
| rs583687    | 11 | 119772958 | T | C | -1.141 | 0.2538 | -? | 0      | 0     | 0 | 1      |
| rs73020470  | 11 | 117771769 | C | T | 1.141  | 0.2539 | +? | 0      | 0     | 0 | 1      |
| rs78528013  | 11 | 120826272 | T | C | -1.141 | 0.254  | -? | 0      | 0     | 0 | 1      |
| rs7935816   | 11 | 119665842 | T | C | 1.141  | 0.254  | +? | 0      | 0     | 0 | 1      |
| rs80159023  | 11 | 119845446 | A | G | -1.141 | 0.254  | -? | 0      | 0     | 0 | 1      |
| rs2510152   | 11 | 119148573 | G | T | -1.14  | 0.2541 | -? | 0      | 0     | 0 | 1      |
| rs4245166   | 11 | 116194551 | G | A | -1.14  | 0.2541 | -? | 0      | 0     | 0 | 1      |
| rs4938603   | 11 | 118846482 | G | A | -1.14  | 0.2541 | -? | 0      | 0     | 0 | 1      |
| rs6589652   | 11 | 118058358 | G | A | -1.14  | 0.2543 | +  | -62.5  | 1.846 | 1 | 0.1743 |
| rs947917    | 11 | 117773537 | G | A | 1.14   | 0.2543 | +? | 0      | 0     | 0 | 1      |
| rs61904847  | 11 | 116453885 | C | T | -1.14  | 0.2544 | -? | 0      | 0     | 0 | 1      |
| rs2515797   | 11 | 117818680 | G | A | -1.139 | 0.2547 | -? | 0      | 0     | 0 | 1      |
| rs34607201  | 11 | 120803734 | A | G | -1.139 | 0.2547 | -? | 0      | 0     | 0 | 1      |
| rs10892499  | 11 | 119808864 | A | G | -1.139 | 0.2549 | -? | 0      | 0     | 0 | 1      |
| rs6589819   | 11 | 120479103 | A | G | 1.138  | 0.255  | +? | 0      | 0     | 0 | 1      |
| rs73587426  | 11 | 117633791 | G | C | -1.138 | 0.255  | -? | 0      | 0     | 0 | 1      |
| rs73587428  | 11 | 117633827 | G | A | -1.138 | 0.255  | -? | 0      | 0     | 0 | 1      |
| rs73587429  | 11 | 117633869 | A | G | -1.138 | 0.255  | -? | 0      | 0     | 0 | 1      |
| rs61903857  | 11 | 117633297 | T | G | -1.138 | 0.2552 | -? | 0      | 0     | 0 | 1      |
| rs61903858  | 11 | 117633349 | A | G | -1.138 | 0.2552 | -? | 0      | 0     | 0 | 1      |
| rs74702343  | 11 | 120715471 | A | G | 1.137  | 0.2556 | +? | 0      | 0     | 0 | 1      |
| rs589925    | 11 | 118955679 | T | C | 1.137  | 0.2557 | +? | 0      | 0     | 0 | 1      |
| rs592190    | 11 | 118955314 | A | G | 1.137  | 0.2557 | +? | 0      | 0     | 0 | 1      |
| rs11216129  | 11 | 116620256 | A | C | -1.136 | 0.2559 | +  | 0      | 0.883 | 1 | 0.3475 |
| rs2252520   | 11 | 120115570 | A | T | -1.136 | 0.2561 | -? | 0      | 0     | 0 | 1      |
| rs512393    | 11 | 119823440 | C | G | 1.136  | 0.2561 | +? | 0      | 0     | 0 | 1      |
| rs17311024  | 11 | 117644124 | A | T | -1.135 | 0.2564 | -? | 0      | 0     | 0 | 1      |
| rs602445    | 11 | 117958148 | C | T | -1.135 | 0.2565 | -? | 0      | 0     | 0 | 1      |
| rs12223674  | 11 | 117451256 | G | C | 1.134  | 0.2568 | +? | 0      | 0     | 0 | 1      |
| rs688911    | 11 | 118036532 | C | T | 1.134  | 0.2568 | +? | 0      | 0     | 0 | 1      |
| rs77806521  | 11 | 118232026 | T | C | -1.134 | 0.2568 | -? | 0      | 0     | 0 | 1      |
| rs948378    | 11 | 121120845 | A | T | -1.134 | 0.2568 | -- | 0      | 0.007 | 1 | 0.9353 |
| rs142108356 | 11 | 119749609 | G | A | -1.134 | 0.257  | -? | 0      | 0     | 0 | 1      |
| rs591252    | 11 | 120809279 | C | T | 1.134  | 0.257  | +? | 0      | 0     | 0 | 1      |
| rs11216021  | 11 | 116458660 | T | C | -1.133 | 0.2571 | -? | 0      | 0     | 0 | 1      |
| rs142724980 | 11 | 119882823 | T | C | 1.133  | 0.2573 | +? | 0      | 0     | 0 | 1      |
| rs4938502   | 11 | 118179941 | T | G | 1.133  | 0.2573 | +? | 0      | 0     | 0 | 1      |
| rs57258844  | 11 | 116538407 | C | G | 1.133  | 0.2573 | +? | 0      | 0     | 0 | 1      |
| rs77571870  | 11 | 120826325 | A | G | -1.133 | 0.2574 | -? | 0      | 0     | 0 | 1      |
| rs12796452  | 11 | 120800956 | C | G | -1.132 | 0.2575 | +  | -193.4 | 1.023 | 1 | 0.3119 |
| rs111226844 | 11 | 117895854 | C | T | 1.131  | 0.2582 | +? | 0      | 0     | 0 | 1      |
| rs11607997  | 11 | 119941330 | T | C | -1.131 | 0.2582 | -? | 0      | 0     | 0 | 1      |
| rs4938411   | 11 | 117444884 | A | G | 1.13   | 0.2583 | +? | 0      | 0     | 0 | 1      |
| rs61903856  | 11 | 117632463 | A | G | -1.13  | 0.2583 | -? | 0      | 0     | 0 | 1      |
| rs78034012  | 11 | 116324006 | C | G | -1.13  | 0.2583 | -? | 0      | 0     | 0 | 1      |
| rs9681206   | 11 | 116539518 | T | C | 1.13   | 0.2583 | +? | 0      | 0     | 0 | 1      |

|              |    |           |   |   |        |        |    |       |       |   |         |
|--------------|----|-----------|---|---|--------|--------|----|-------|-------|---|---------|
| rs12804621   | 11 | 120622385 | T | C | -1.129 | 0.2589 | -? | 0     | 0     | 0 | 1       |
| rs577166     | 11 | 117351353 | T | C | 1.129  | 0.2589 | +  | 0     | 0     | 0 | 1       |
| rs7110955    | 11 | 120323909 | G | A | -1.129 | 0.2589 | -? | 0     | 0     | 0 | 1       |
| rs11216713   | 11 | 117903942 | A | G | 1.129  | 0.2591 | ++ | 0     | 0     | 1 | 0.9836  |
| rs74236011   | 11 | 120154647 | G | T | -1.128 | 0.2593 | -? | 0     | 0     | 0 | 1       |
| rs1893460    | 11 | 116603677 | A | G | -1.128 | 0.2594 | -- | 0     | 0.049 | 1 | 0.8248  |
| rs7116690    | 11 | 118837742 | G | A | -1.128 | 0.2594 | -? | 0     | 0     | 0 | 1       |
| rs10790413   | 11 | 121113880 | C | A | -1.128 | 0.2595 | -- | 0     | 0.006 | 1 | 0.9382  |
| rs523267     | 11 | 116523279 | C | T | 1.127  | 0.2596 | +  | 0     | 0     | 0 | 1       |
| rs117083922  | 11 | 117906282 | A | G | 1.127  | 0.2597 | ++ | 0     | 0     | 1 | 1       |
| rs11217470   | 11 | 119629249 | C | T | 1.126  | 0.26   | ++ | 0     | 0.164 | 1 | 0.6857  |
| rs7924359    | 11 | 117960590 | G | C | -1.126 | 0.2601 | -- | 0     | 0.146 | 1 | 0.702   |
| rs7928767    | 11 | 117650439 | A | G | -1.126 | 0.2602 | -? | 0     | 0     | 0 | 1       |
| rs11822940   | 11 | 119520997 | C | G | -1.125 | 0.2604 | -? | 0     | 0     | 0 | 1       |
| rs7946299    | 11 | 116587849 | C | T | 1.125  | 0.2604 | +  | 0     | 0     | 0 | 1       |
| rs10892654   | 11 | 120837407 | G | A | -1.125 | 0.2605 | -? | 0     | 0     | 0 | 1       |
| rs10892497   | 11 | 119804776 | T | C | -1.125 | 0.2606 | -? | 0     | 0     | 0 | 1       |
| rs4936490    | 11 | 119506749 | A | G | 1.125  | 0.2606 | +  | 0     | 0     | 0 | 1       |
| rs555577     | 11 | 117726697 | A | G | 1.125  | 0.2606 | +  | 0     | 0     | 0 | 1       |
| rs3018521    | 11 | 117818878 | A | G | -1.125 | 0.2607 | -? | 0     | 0     | 0 | 1       |
| rs688968     | 11 | 117406739 | G | C | -1.125 | 0.2607 | -? | 0     | 0     | 0 | 1       |
| rs34028064   | 11 | 120075878 | A | C | -1.125 | 0.2608 | -? | 0     | 0     | 0 | 1       |
| rs17120893   | 11 | 117443936 | T | C | 1.124  | 0.2609 | +  | 0     | 0     | 0 | 1       |
| rs74999919   | 11 | 119829794 | G | A | -1.124 | 0.2609 | -? | 0     | 0     | 0 | 1       |
| rs1430595649 | 11 | 116435383 | T | C | -1.124 | 0.261  | -? | 0     | 0     | 0 | 1       |
| rs61904808   | 11 | 116436102 | G | A | -1.124 | 0.261  | -? | 0     | 0     | 0 | 1       |
| rs61904809   | 11 | 116436589 | T | C | -1.124 | 0.261  | -? | 0     | 0     | 0 | 1       |
| rs12794408   | 11 | 116494803 | G | A | -1.124 | 0.2612 | -? | 0     | 0     | 0 | 1       |
| rs1838947    | 11 | 119691200 | C | T | 1.124  | 0.2612 | ++ | 0     | 0.12  | 1 | 0.7295  |
| rs10160642   | 11 | 121114248 | T | C | -1.123 | 0.2615 | -- | 0     | 0.006 | 1 | 0.9403  |
| rs6589854    | 11 | 120954446 | G | T | -1.123 | 0.2615 | -? | 0     | 0     | 0 | 1       |
| rs2174876    | 11 | 116439684 | A | G | -1.123 | 0.2616 | -? | 0     | 0     | 0 | 1       |
| rs4938730    | 11 | 119689931 | C | T | 1.123  | 0.2616 | ++ | 0     | 0.049 | 1 | 0.8257  |
| rs639785     | 11 | 118062268 | T | C | -1.123 | 0.2616 | +  | -66.4 | 1.803 | 1 | 0.1794  |
| rs73003760   | 11 | 120710519 | C | T | 1.123  | 0.2616 | +  | 0     | 0     | 0 | 1       |
| rs2276071    | 11 | 118896116 | C | A | -1.122 | 0.2617 | -- | 0     | 0.209 | 1 | 0.6472  |
| rs74442127   | 11 | 119828201 | A | G | -1.122 | 0.2617 | -? | 0     | 0     | 0 | 1       |
| rs35301288   | 11 | 119578224 | A | G | -1.122 | 0.2619 | -? | 0     | 0     | 0 | 1       |
| rs7938295    | 11 | 120644115 | A | G | 1.121  | 0.2621 | +  | 0     | 0     | 0 | 1       |
| rs59238367   | 11 | 117920100 | A | G | -1.121 | 0.2622 | -? | 0     | 0     | 0 | 1       |
| rs674576     | 11 | 117919097 | A | G | -1.121 | 0.2623 | -? | 0     | 0     | 0 | 1       |
| rs9667364    | 11 | 119785124 | G | A | -1.121 | 0.2623 | -? | 0     | 0     | 0 | 1       |
| rs180351     | 11 | 116607641 | T | C | 1.121  | 0.2625 | +- | -49.3 | 2.009 | 1 | 0.1563  |
| rs76521293   | 11 | 116253907 | C | T | -1.12  | 0.2626 | -? | 0     | 0     | 0 | 1       |
| rs4936356    | 11 | 116431521 | G | A | -1.12  | 0.2627 | -? | 0     | 0     | 0 | 1       |
| rs7929825    | 11 | 118788081 | G | C | 1.12   | 0.2628 | +- | 20.4  | 3.77  | 1 | 0.05217 |
| rs10892696   | 11 | 121114116 | C | A | -1.12  | 0.2629 | -- | 0     | 0.005 | 1 | 0.9419  |
| rs11605509   | 11 | 117396433 | C | T | -1.12  | 0.2629 | -? | 0     | 0     | 0 | 1       |
| rs12800264   | 11 | 117396269 | A | G | -1.12  | 0.2629 | -? | 0     | 0     | 0 | 1       |
| rs1941390    | 11 | 117396991 | A | G | -1.12  | 0.2629 | -? | 0     | 0     | 0 | 1       |
| rs10892364   | 11 | 119301608 | T | C | 1.119  | 0.263  | +  | 0     | 0     | 0 | 1       |
| rs2156850    | 11 | 118030186 | A | G | 1.119  | 0.263  | +  | 0     | 0     | 0 | 1       |
| rs4445646    | 11 | 120556341 | C | T | -1.119 | 0.2631 | -? | 0     | 0     | 0 | 1       |
| rs4938732    | 11 | 119690068 | T | C | 1.119  | 0.2631 | ++ | 0     | 0.048 | 1 | 0.8272  |
| rs61904807   | 11 | 116434463 | G | C | -1.118 | 0.2635 | -? | 0     | 0     | 0 | 1       |
| rs78012672   | 11 | 117443368 | A | G | 1.118  | 0.2635 | +  | 0     | 0     | 0 | 1       |

|             |    |           |   |   |        |        |    |   |       |   |        |
|-------------|----|-----------|---|---|--------|--------|----|---|-------|---|--------|
| rs11217860  | 11 | 120279620 | T | G | -1.118 | 0.2636 | -? | 0 | 0     | 0 | 1      |
| rs4938384   | 11 | 117333952 | A | G | 1.118  | 0.2636 | +  | 0 | 0     | 0 | 1      |
| rs79656669  | 11 | 117477245 | C | T | 1.118  | 0.2637 | +  | 0 | 0     | 0 | 1      |
| rs947987    | 11 | 116507107 | A | G | 1.117  | 0.2638 | +  | 0 | 0     | 0 | 1      |
| rs147189349 | 11 | 117302538 | A | G | 1.117  | 0.2642 | +  | 0 | 0     | 0 | 1      |
| rs11217608  | 11 | 119849828 | G | A | -1.116 | 0.2644 | -? | 0 | 0     | 0 | 1      |
| rs10892105  | 11 | 117312962 | G | A | -1.116 | 0.2645 | -? | 0 | 0     | 0 | 1      |
| rs643377    | 11 | 119907628 | A | G | 1.116  | 0.2645 | +  | 0 | 0     | 0 | 1      |
| rs9651694   | 11 | 119857422 | G | A | -1.116 | 0.2645 | -? | 0 | 0     | 0 | 1      |
| rs582545    | 11 | 119906741 | G | C | 1.116  | 0.2646 | +  | 0 | 0     | 0 | 1      |
| rs10892145  | 11 | 117496301 | A | G | -1.115 | 0.2648 | -? | 0 | 0     | 0 | 1      |
| rs4938288   | 11 | 116452534 | G | C | 1.115  | 0.2648 | +  | 0 | 0     | 0 | 1      |
| rs2511856   | 11 | 119144148 | G | T | -1.115 | 0.2649 | -? | 0 | 0     | 0 | 1      |
| rs518932    | 11 | 119771843 | C | T | -1.115 | 0.2649 | -? | 0 | 0     | 0 | 1      |
| rs4938737   | 11 | 119769492 | T | C | -1.114 | 0.2651 | -? | 0 | 0     | 0 | 1      |
| rs35503235  | 11 | 117392110 | G | A | 1.114  | 0.2652 | +  | 0 | 0     | 0 | 1      |
| rs4573680   | 11 | 118872741 | C | T | -1.114 | 0.2652 | -- | 0 | 0.095 | 1 | 0.7582 |
| rs7101412   | 11 | 120488476 | T | C | 1.114  | 0.2653 | +  | 0 | 0     | 0 | 1      |
| rs7117565   | 11 | 116408615 | C | T | -1.114 | 0.2653 | -? | 0 | 0     | 0 | 1      |
| rs12284644  | 11 | 120450016 | G | A | -1.113 | 0.2655 | -? | 0 | 0     | 0 | 1      |
| rs11217859  | 11 | 120278166 | C | G | -1.113 | 0.2657 | -? | 0 | 0     | 0 | 1      |
| rs2305011   | 11 | 120338040 | G | A | 1.113  | 0.2657 | ++ | 0 | 0.842 | 1 | 0.3588 |
| rs4514433   | 11 | 119492158 | C | T | -1.112 | 0.2662 | -? | 0 | 0     | 0 | 1      |
| rs11217881  | 11 | 120344551 | G | A | -1.112 | 0.2663 | -? | 0 | 0     | 0 | 1      |
| rs11217882  | 11 | 120345002 | G | T | -1.112 | 0.2663 | -? | 0 | 0     | 0 | 1      |
| rs11217883  | 11 | 120345004 | G | A | -1.112 | 0.2663 | -? | 0 | 0     | 0 | 1      |
| rs11217890  | 11 | 120357547 | A | G | -1.111 | 0.2664 | -? | 0 | 0     | 0 | 1      |
| rs11217889  | 11 | 120356317 | G | C | -1.111 | 0.2665 | -? | 0 | 0     | 0 | 1      |
| rs12420339  | 11 | 116328597 | G | T | 1.111  | 0.2666 | +  | 0 | 0     | 0 | 1      |
| rs12421652  | 11 | 116625875 | T | G | -1.111 | 0.2666 | -+ | 0 | 0.856 | 1 | 0.3549 |
| rs2276339   | 11 | 117395481 | A | G | -1.111 | 0.2666 | -? | 0 | 0     | 0 | 1      |
| rs11216539  | 11 | 117631784 | C | T | -1.11  | 0.2668 | -? | 0 | 0     | 0 | 1      |
| rs648740    | 11 | 117447373 | A | G | 1.11   | 0.2668 | +  | 0 | 0     | 0 | 1      |
| rs80294967  | 11 | 119795416 | A | G | -1.11  | 0.2668 | -? | 0 | 0     | 0 | 1      |
| rs497548    | 11 | 117343399 | T | C | 1.11   | 0.2669 | +  | 0 | 0     | 0 | 1      |
| rs503281    | 11 | 117430971 | C | G | 1.11   | 0.2671 | +  | 0 | 0     | 0 | 1      |
| rs575030    | 11 | 121092398 | C | T | 1.11   | 0.2672 | +  | 0 | 0     | 0 | 1      |
| rs579078    | 11 | 116229947 | C | G | -1.11  | 0.2672 | -? | 0 | 0     | 0 | 1      |
| rs583606    | 11 | 119860625 | C | G | 1.11   | 0.2672 | +  | 0 | 0     | 0 | 1      |
| rs7102492   | 11 | 119300712 | T | C | 1.11   | 0.2672 | +  | 0 | 0     | 0 | 1      |
| rs7105316   | 11 | 119791050 | T | C | -1.11  | 0.2672 | -? | 0 | 0     | 0 | 1      |
| rs653598    | 11 | 118036538 | C | T | 1.109  | 0.2673 | +  | 0 | 0     | 0 | 1      |
| rs4245207   | 11 | 119688442 | A | G | 1.109  | 0.2675 | ++ | 0 | 0.04  | 1 | 0.8411 |
| rs2847498   | 11 | 120113664 | C | T | -1.109 | 0.2676 | -? | 0 | 0     | 0 | 1      |
| rs2512159   | 11 | 117826191 | G | C | 1.108  | 0.2677 | ++ | 0 | 0.333 | 1 | 0.564  |
| rs5128      | 11 | 116703640 | G | C | 1.108  | 0.2677 | +  | 0 | 0     | 0 | 1      |
| rs2044545   | 11 | 119765318 | T | C | -1.108 | 0.2678 | -? | 0 | 0     | 0 | 1      |
| rs12282721  | 11 | 117151412 | A | G | -1.108 | 0.2679 | -? | 0 | 0     | 0 | 1      |
| rs61898317  | 11 | 120163184 | G | A | -1.108 | 0.268  | -? | 0 | 0     | 0 | 1      |
| rs34172399  | 11 | 120073521 | C | A | -1.107 | 0.2682 | -? | 0 | 0     | 0 | 1      |
| rs10892698  | 11 | 121118260 | C | T | -1.107 | 0.2684 | -- | 0 | 0.004 | 1 | 0.9477 |
| rs10892699  | 11 | 121119493 | C | G | -1.107 | 0.2684 | -- | 0 | 0.004 | 1 | 0.9477 |
| rs4936597   | 11 | 121118878 | G | A | -1.107 | 0.2684 | -- | 0 | 0.004 | 1 | 0.9477 |
| rs542467    | 11 | 119770931 | C | T | -1.107 | 0.2684 | -? | 0 | 0     | 0 | 1      |
| rs80138815  | 11 | 117470795 | G | A | 1.107  | 0.2684 | +  | 0 | 0     | 0 | 1      |
| rs11216714  | 11 | 117904550 | A | G | 1.106  | 0.2686 | ++ | 0 | 0     | 1 | 0.9937 |

|             |    |           |   |   |        |        |    |       |       |   |        |
|-------------|----|-----------|---|---|--------|--------|----|-------|-------|---|--------|
| rs11216715  | 11 | 117905217 | T | A | 1.106  | 0.2686 | ++ | 0     | 0     | 1 | 0.9937 |
| rs11216716  | 11 | 117905394 | A | G | 1.106  | 0.2686 | ++ | 0     | 0     | 1 | 0.9937 |
| rs12223224  | 11 | 117904710 | T | C | 1.106  | 0.2686 | ++ | 0     | 0     | 1 | 0.9937 |
| rs12223683  | 11 | 117905654 | A | G | 1.106  | 0.2686 | ++ | 0     | 0     | 1 | 0.9937 |
| rs12226036  | 11 | 117904793 | G | A | 1.106  | 0.2686 | ++ | 0     | 0     | 1 | 0.9937 |
| rs77212554  | 11 | 119840963 | T | C | -1.106 | 0.2686 | -? | 0     | 0     | 0 | 1      |
| rs79075579  | 11 | 117905786 | T | C | 1.106  | 0.2686 | ++ | 0     | 0     | 1 | 0.9937 |
| rs80001712  | 11 | 117905495 | T | C | 1.106  | 0.2686 | ++ | 0     | 0     | 1 | 0.9937 |
| rs11216517  | 11 | 117595511 | T | C | -1.106 | 0.2688 | -? | 0     | 0     | 0 | 1      |
| rs603826    | 11 | 118970878 | C | A | -1.106 | 0.2688 | -? | 0     | 0     | 0 | 1      |
| rs11603340  | 11 | 117396527 | G | C | -1.106 | 0.2689 | -? | 0     | 0     | 0 | 1      |
| rs3802882   | 11 | 118889822 | G | C | 1.106  | 0.2689 | +  | 0     | 0     | 0 | 1      |
| rs1145207   | 11 | 116715688 | G | A | -1.105 | 0.269  | -? | 0     | 0     | 0 | 1      |
| rs2849179   | 11 | 116620796 | T | C | 1.105  | 0.2691 | +- | -38.7 | 2.163 | 1 | 0.1414 |
| rs61902060  | 11 | 118839828 | G | C | -1.105 | 0.2692 | -? | 0     | 0     | 0 | 1      |
| rs10790414  | 11 | 121115895 | T | G | -1.105 | 0.2693 | -- | 0     | 0.004 | 1 | 0.9486 |
| rs10790415  | 11 | 121115951 | C | G | -1.104 | 0.2694 | -- | 0     | 0.004 | 1 | 0.9487 |
| rs2276072   | 11 | 118896115 | G | A | -1.104 | 0.2696 | -- | 0     | 0.235 | 1 | 0.628  |
| rs631932    | 11 | 119768853 | C | A | -1.104 | 0.2696 | -? | 0     | 0     | 0 | 1      |
| rs599385    | 11 | 118974485 | G | A | -1.104 | 0.2697 | -? | 0     | 0     | 0 | 1      |
| rs7102696   | 11 | 119300694 | A | G | 1.104  | 0.2697 | +  | 0     | 0     | 0 | 1      |
| rs7111358   | 11 | 119089831 | A | T | -1.104 | 0.2697 | -? | 0     | 0     | 0 | 1      |
| rs10892573  | 11 | 120287803 | G | A | -1.104 | 0.2698 | -? | 0     | 0     | 0 | 1      |
| rs7947677   | 11 | 120478670 | G | T | 1.104  | 0.2698 | +  | 0     | 0     | 0 | 1      |
| rs10502226  | 11 | 117441703 | G | T | 1.103  | 0.2701 | +  | 0     | 0     | 0 | 1      |
| rs10892449  | 11 | 119628238 | G | C | 1.103  | 0.2701 | ++ | 0     | 0.153 | 1 | 0.6957 |
| rs636783    | 11 | 117539715 | C | A | -1.103 | 0.2701 | -? | 0     | 0     | 0 | 1      |
| rs7129717   | 11 | 119853069 | G | T | -1.102 | 0.2703 | -? | 0     | 0     | 0 | 1      |
| rs116006647 | 11 | 117200974 | T | C | -1.102 | 0.2704 | -? | 0     | 0     | 0 | 1      |
| rs55869319  | 11 | 120302729 | T | C | 1.102  | 0.2704 | ++ | 0     | 0.995 | 1 | 0.3185 |
| rs625404    | 11 | 117954350 | C | T | -1.102 | 0.2705 | -? | 0     | 0     | 0 | 1      |
| rs688857    | 11 | 119909507 | T | C | 1.102  | 0.2705 | +  | 0     | 0     | 0 | 1      |
| rs11217188  | 11 | 119088176 | A | G | -1.101 | 0.2707 | -? | 0     | 0     | 0 | 1      |
| rs11826230  | 11 | 119412939 | T | G | -1.101 | 0.2707 | -? | 0     | 0     | 0 | 1      |
| rs543577    | 11 | 121039069 | A | G | -1.101 | 0.2707 | -? | 0     | 0     | 0 | 1      |
| rs11217107  | 11 | 118839268 | C | G | -1.101 | 0.271  | -? | 0     | 0     | 0 | 1      |
| rs61900159  | 11 | 118839133 | C | G | -1.101 | 0.271  | -? | 0     | 0     | 0 | 1      |
| rs12575317  | 11 | 120414641 | C | T | 1.101  | 0.2711 | +  | 0     | 0     | 0 | 1      |
| rs553578    | 11 | 119778355 | G | A | -1.1   | 0.2714 | -? | 0     | 0     | 0 | 1      |
| rs7115337   | 11 | 121116773 | T | G | -1.1   | 0.2714 | -- | 0     | 0.004 | 1 | 0.9508 |
| rs11218066  | 11 | 120808928 | T | C | 1.1    | 0.2715 | +  | 0     | 0     | 0 | 1      |
| rs10160459  | 11 | 121114571 | C | T | -1.099 | 0.2716 | -- | 0     | 0.004 | 1 | 0.9511 |
| rs2849165   | 11 | 116688478 | T | C | -1.099 | 0.2716 | -? | 0     | 0     | 0 | 1      |
| rs36109901  | 11 | 119083318 | C | A | 1.099  | 0.2718 | +  | 0     | 0     | 0 | 1      |
| rs4938263   | 11 | 116210212 | G | A | -1.099 | 0.2718 | -? | 0     | 0     | 0 | 1      |
| rs7103283   | 11 | 121117803 | A | T | -1.098 | 0.272  | -- | 0     | 0.004 | 1 | 0.9515 |
| rs7103470   | 11 | 121117684 | G | T | -1.098 | 0.272  | -- | 0     | 0.004 | 1 | 0.9515 |
| rs76085613  | 11 | 119835845 | A | G | -1.098 | 0.2722 | -? | 0     | 0     | 0 | 1      |
| rs77142768  | 11 | 119835506 | G | A | -1.098 | 0.2722 | -? | 0     | 0     | 0 | 1      |
| rs9667310   | 11 | 119342678 | A | G | -1.098 | 0.2722 | -? | 0     | 0     | 0 | 1      |
| rs10160458  | 11 | 121114375 | G | A | -1.098 | 0.2723 | -- | 0     | 0.004 | 1 | 0.9518 |
| rs11218016  | 11 | 120694754 | T | C | -1.098 | 0.2723 | -? | 0     | 0     | 0 | 1      |
| rs12793150  | 11 | 118180667 | G | C | 1.098  | 0.2723 | +  | 0     | 0     | 0 | 1      |
| rs3802883   | 11 | 118889813 | G | C | 1.098  | 0.2723 | +  | 0     | 0     | 0 | 1      |
| rs522843    | 11 | 117175934 | C | T | 1.098  | 0.2724 | +  | 0     | 0     | 0 | 1      |
| rs508731    | 11 | 116244267 | A | T | -1.097 | 0.2726 | -? | 0     | 0     | 0 | 1      |

|             |    |           |   |   |        |        |    |        |       |   |        |
|-------------|----|-----------|---|---|--------|--------|----|--------|-------|---|--------|
| rs604714    | 11 | 118970696 | A | C | -1.097 | 0.2727 | -? | 0      | 0     | 0 | 1      |
| rs12224853  | 11 | 117394822 | T | C | -1.097 | 0.2728 | -? | 0      | 0     | 0 | 1      |
| rs567797    | 11 | 119692211 | A | T | 1.097  | 0.2728 | ++ | 0      | 0.042 | 1 | 0.8374 |
| rs7929781   | 11 | 120441139 | T | C | -1.097 | 0.2728 | -? | 0      | 0     | 0 | 1      |
| rs1893248   | 11 | 121120755 | T | C | 1.096  | 0.2729 | ++ | 0      | 0.367 | 1 | 0.5446 |
| rs896690    | 11 | 119932578 | A | G | 1.096  | 0.2729 | +  | 0      | 0     | 0 | 1      |
| rs918143    | 11 | 116630600 | T | C | 1.096  | 0.2729 | +- | -61.1  | 1.862 | 1 | 0.1724 |
| rs73002932  | 11 | 119466427 | T | C | 1.096  | 0.2731 | +  | 0      | 0     | 0 | 1      |
| rs561830    | 11 | 119043745 | T | C | 1.096  | 0.2732 | ++ | 0      | 0.105 | 1 | 0.746  |
| rs1263176   | 11 | 116690123 | T | C | -1.095 | 0.2735 | -? | 0      | 0     | 0 | 1      |
| rs148143761 | 11 | 116950556 | G | A | -1.095 | 0.2737 | -? | 0      | 0     | 0 | 1      |
| rs1939235   | 11 | 117477867 | T | C | 1.095  | 0.2737 | +  | 0      | 0     | 0 | 1      |
| rs2298725   | 11 | 120823608 | A | G | -1.095 | 0.2737 | -? | 0      | 0     | 0 | 1      |
| rs1787687   | 11 | 116549896 | G | A | -1.094 | 0.2738 | -? | 0      | 0     | 0 | 1      |
| rs7940298   | 11 | 119635453 | T | C | 1.094  | 0.2738 | ++ | 0      | 0.149 | 1 | 0.6992 |
| rs11603366  | 11 | 117396505 | T | G | -1.094 | 0.2739 | -? | 0      | 0     | 0 | 1      |
| rs34306783  | 11 | 117841718 | T | C | 1.094  | 0.2739 | ++ | 0      | 0.651 | 1 | 0.4197 |
| rs79300298  | 11 | 119625373 | C | G | 1.094  | 0.2739 | ++ | 0      | 0.149 | 1 | 0.6993 |
| rs17540777  | 11 | 118150259 | G | T | 1.093  | 0.2744 | +  | 0      | 0     | 0 | 1      |
| rs74582224  | 11 | 117906289 | T | G | 1.093  | 0.2745 | ++ | 0      | 0     | 1 | 1      |
| rs766894    | 11 | 120328858 | C | T | -1.093 | 0.2745 | -? | 0      | 0     | 0 | 1      |
| rs78197730  | 11 | 117906408 | T | C | 1.093  | 0.2745 | ++ | 0      | 0     | 1 | 1      |
| rs79791963  | 11 | 117906406 | G | C | 1.093  | 0.2745 | ++ | 0      | 0     | 1 | 1      |
| rs61900794  | 11 | 120274893 | C | T | -1.093 | 0.2746 | -? | 0      | 0     | 0 | 1      |
| rs11217879  | 11 | 120341723 | C | T | -1.092 | 0.2747 | -? | 0      | 0     | 0 | 1      |
| rs538079    | 11 | 117342221 | G | A | -1.092 | 0.2747 | -? | 0      | 0     | 0 | 1      |
| rs11216080  | 11 | 116530998 | T | G | 1.092  | 0.2749 | +  | 0      | 0     | 0 | 1      |
| rs1440183   | 11 | 116203433 | C | T | -1.092 | 0.2749 | -? | 0      | 0     | 0 | 1      |
| rs2005529   | 11 | 120798714 | C | G | -1.092 | 0.275  | -? | 0      | 0     | 0 | 1      |
| rs77020062  | 11 | 119654894 | T | C | -1.091 | 0.2752 | -? | 0      | 0     | 0 | 1      |
| rs45539032  | 11 | 118015832 | A | G | -1.091 | 0.2753 | -? | 0      | 0     | 0 | 1      |
| rs4938800   | 11 | 120209386 | A | G | 1.091  | 0.2753 | ++ | -197.6 | 1.008 | 1 | 0.3153 |
| rs6589722   | 11 | 119085783 | C | A | -1.091 | 0.2753 | -? | 0      | 0     | 0 | 1      |
| rs7121930   | 11 | 117494246 | T | G | -1.091 | 0.2754 | -? | 0      | 0     | 0 | 1      |
| rs663191    | 11 | 117335991 | T | C | 1.09   | 0.2757 | +  | 0      | 0     | 0 | 1      |
| rs677954    | 11 | 117336947 | T | C | 1.09   | 0.2757 | +  | 0      | 0     | 0 | 1      |
| rs12294322  | 11 | 116543552 | G | A | -1.09  | 0.2758 | -? | 0      | 0     | 0 | 1      |
| rs3016355   | 11 | 116545495 | T | A | -1.09  | 0.2758 | -? | 0      | 0     | 0 | 1      |
| rs7103097   | 11 | 120728827 | A | C | 1.09   | 0.2758 | +  | 0      | 0     | 0 | 1      |
| rs7121331   | 11 | 116362253 | C | T | -1.09  | 0.2758 | -? | 0      | 0     | 0 | 1      |
| rs4938618   | 11 | 118867803 | C | G | -1.089 | 0.2762 | -- | 0      | 0.197 | 1 | 0.657  |
| rs590917    | 11 | 117902914 | T | G | -1.089 | 0.2762 | -- | 0      | 0.746 | 1 | 0.3879 |
| rs7931603   | 11 | 120965687 | A | G | -1.088 | 0.2765 | -? | 0      | 0     | 0 | 1      |
| rs616314    | 11 | 118956867 | A | T | -1.088 | 0.2766 | -? | 0      | 0     | 0 | 1      |
| rs10892581  | 11 | 120334863 | C | A | -1.088 | 0.2767 | -? | 0      | 0     | 0 | 1      |
| rs11600200  | 11 | 120334680 | G | T | -1.088 | 0.2767 | -? | 0      | 0     | 0 | 1      |
| rs113381053 | 11 | 119757989 | A | G | -1.087 | 0.277  | -? | 0      | 0     | 0 | 1      |
| rs117508216 | 11 | 120795955 | C | A | 1.087  | 0.277  | +  | 0      | 0     | 0 | 1      |
| rs12270510  | 11 | 119506018 | T | C | 1.087  | 0.277  | +  | 0      | 0     | 0 | 1      |
| rs1287394   | 11 | 120093606 | C | T | -1.087 | 0.277  | -? | 0      | 0     | 0 | 1      |
| rs10790287  | 11 | 119084914 | A | G | -1.087 | 0.2771 | -? | 0      | 0     | 0 | 1      |
| rs2887193   | 11 | 117825368 | A | G | 1.087  | 0.2771 | +  | 0      | 0     | 0 | 1      |
| rs11217871  | 11 | 120315637 | C | T | -1.087 | 0.2772 | -? | 0      | 0     | 0 | 1      |
| rs11600558  | 11 | 120310322 | C | T | -1.087 | 0.2772 | -? | 0      | 0     | 0 | 1      |
| rs61898768  | 11 | 120353237 | A | G | -1.087 | 0.2772 | -? | 0      | 0     | 0 | 1      |
| rs9625      | 11 | 120355791 | T | G | -1.087 | 0.2772 | -? | 0      | 0     | 0 | 1      |

|             |    |           |   |   |        |        |    |        |       |   |        |
|-------------|----|-----------|---|---|--------|--------|----|--------|-------|---|--------|
| rs9666441   | 11 | 120311054 | G | A | -1.087 | 0.2772 | -? | 0      | 0     | 0 | 1      |
| rs12290699  | 11 | 120195702 | C | T | -1.086 | 0.2775 | -? | 0      | 0     | 0 | 1      |
| rs61898318  | 11 | 120171371 | A | G | -1.086 | 0.2775 | -? | 0      | 0     | 0 | 1      |
| rs77436344  | 11 | 119839219 | A | G | -1.086 | 0.2775 | -? | 0      | 0     | 0 | 1      |
| rs79652828  | 11 | 119838717 | T | C | -1.086 | 0.2775 | -? | 0      | 0     | 0 | 1      |
| rs7108905   | 11 | 118712427 | G | C | -1.086 | 0.2776 | -- | 0      | 0     | 1 | 0.9881 |
| rs35912781  | 11 | 120360271 | A | G | -1.086 | 0.2777 | -? | 0      | 0     | 0 | 1      |
| rs6589636   | 11 | 117824500 | C | T | 1.086  | 0.2777 | +? | 0      | 0     | 0 | 1      |
| rs6589710   | 11 | 118837460 | T | A | -1.086 | 0.2777 | -? | 0      | 0     | 0 | 1      |
| rs4936350   | 11 | 116314513 | T | C | 1.085  | 0.2778 | +? | 0      | 0     | 0 | 1      |
| rs574383    | 11 | 118573668 | C | T | 1.085  | 0.2778 | ++ | -157.8 | 1.164 | 1 | 0.2807 |
| rs3016345   | 11 | 116471264 | G | A | 1.085  | 0.2779 | +? | 0      | 0     | 0 | 1      |
| rs11217853  | 11 | 120263022 | G | A | -1.085 | 0.278  | -? | 0      | 0     | 0 | 1      |
| rs7925390   | 11 | 119455846 | T | C | 1.085  | 0.278  | +? | 0      | 0     | 0 | 1      |
| rs12574365  | 11 | 120441225 | C | T | -1.085 | 0.2781 | -? | 0      | 0     | 0 | 1      |
| rs12799401  | 11 | 117491758 | C | G | -1.085 | 0.2781 | -? | 0      | 0     | 0 | 1      |
| rs1941306   | 11 | 121115129 | C | A | -1.084 | 0.2782 | -- | 0      | 0.003 | 1 | 0.9579 |
| rs6589866   | 11 | 121115359 | A | G | -1.084 | 0.2782 | -- | 0      | 0.003 | 1 | 0.9579 |
| rs4936384   | 11 | 117398591 | T | C | -1.084 | 0.2783 | -? | 0      | 0     | 0 | 1      |
| rs150854359 | 11 | 117440220 | G | T | 1.084  | 0.2785 | +? | 0      | 0     | 0 | 1      |
| rs625464    | 11 | 118033545 | T | C | -1.084 | 0.2785 | -? | 0      | 0     | 0 | 1      |
| rs7127427   | 11 | 118805138 | A | G | -1.084 | 0.2785 | -- | 0      | 0.409 | 1 | 0.5226 |
| rs12800487  | 11 | 117396386 | A | G | -1.083 | 0.2786 | -? | 0      | 0     | 0 | 1      |
| rs11217472  | 11 | 119630763 | C | T | 1.083  | 0.2787 | ++ | 0      | 0.144 | 1 | 0.704  |
| rs3741300   | 11 | 116631690 | A | G | 1.083  | 0.2787 | +- | -53.3  | 1.956 | 1 | 0.1619 |
| rs659434    | 11 | 120984898 | G | C | 1.083  | 0.2788 | +? | 0      | 0     | 0 | 1      |
| rs2105670   | 11 | 121117142 | A | C | -1.083 | 0.2789 | -- | 0      | 0.003 | 1 | 0.9586 |
| rs118029883 | 11 | 119566235 | A | G | 1.083  | 0.279  | +? | 0      | 0     | 0 | 1      |
| rs4938604   | 11 | 118846574 | C | T | -1.082 | 0.2791 | -? | 0      | 0     | 0 | 1      |
| rs112549212 | 11 | 116495780 | C | T | -1.082 | 0.2792 | -? | 0      | 0     | 0 | 1      |
| rs180340    | 11 | 116616402 | C | T | 1.082  | 0.2792 | +- | -39.1  | 2.157 | 1 | 0.1419 |
| rs4936457   | 11 | 118875727 | G | A | -1.082 | 0.2792 | -- | 0      | 0.093 | 1 | 0.7598 |
| rs4936458   | 11 | 118875761 | G | T | -1.082 | 0.2792 | -- | 0      | 0.093 | 1 | 0.7598 |
| rs7111618   | 11 | 117848926 | G | T | -1.082 | 0.2792 | -- | 0      | 0.329 | 1 | 0.5661 |
| rs747419    | 11 | 120313539 | T | C | -1.082 | 0.2792 | -? | 0      | 0     | 0 | 1      |
| rs1784133   | 11 | 116541417 | T | C | -1.082 | 0.2793 | -? | 0      | 0     | 0 | 1      |
| rs2846016   | 11 | 116541539 | T | C | -1.082 | 0.2793 | -? | 0      | 0     | 0 | 1      |
| rs1269330   | 11 | 116701833 | A | G | -1.082 | 0.2794 | -? | 0      | 0     | 0 | 1      |
| rs34298632  | 11 | 119342143 | C | T | -1.081 | 0.2796 | -? | 0      | 0     | 0 | 1      |
| rs515871    | 11 | 117335517 | A | G | 1.081  | 0.2797 | +? | 0      | 0     | 0 | 1      |
| rs7107776   | 11 | 119080313 | T | C | -1.081 | 0.2798 | -? | 0      | 0     | 0 | 1      |
| rs139289629 | 11 | 117564084 | C | G | 1.081  | 0.2799 | +? | 0      | 0     | 0 | 1      |
| rs145253564 | 11 | 117563458 | T | C | 1.081  | 0.2799 | +? | 0      | 0     | 0 | 1      |
| rs6589865   | 11 | 121115206 | C | T | -1.08  | 0.28   | -- | 0      | 0.003 | 1 | 0.9598 |
| rs71480309  | 11 | 116529956 | T | C | 1.08   | 0.2801 | +? | 0      | 0     | 0 | 1      |
| rs77708326  | 11 | 119794526 | C | T | -1.08  | 0.2801 | -? | 0      | 0     | 0 | 1      |
| rs3758991   | 11 | 117945161 | T | C | -1.079 | 0.2806 | -- | 0      | 0.169 | 1 | 0.6809 |
| rs751370    | 11 | 120610402 | C | T | 1.079  | 0.2807 | +? | 0      | 0     | 0 | 1      |
| rs56880203  | 11 | 121190696 | G | A | 1.079  | 0.2808 | +? | 0      | 0     | 0 | 1      |
| rs12363975  | 11 | 120277392 | A | C | -1.078 | 0.2811 | -? | 0      | 0     | 0 | 1      |
| rs17120560  | 11 | 117161006 | G | C | 1.077  | 0.2813 | +? | 0      | 0     | 0 | 1      |
| rs2115645   | 11 | 119249488 | G | A | 1.077  | 0.2814 | +? | 0      | 0     | 0 | 1      |
| rs10750124  | 11 | 117964339 | C | T | -1.077 | 0.2815 | -? | 0      | 0     | 0 | 1      |
| rs2120430   | 11 | 120261934 | G | C | -1.077 | 0.2817 | -? | 0      | 0     | 0 | 1      |
| rs7129582   | 11 | 121116720 | G | A | -1.077 | 0.2817 | -- | 0      | 0.002 | 1 | 0.9615 |
| rs35401859  | 11 | 116475538 | G | T | 1.076  | 0.2819 | +? | 0      | 0     | 0 | 1      |

|             |    |           |   |   |        |        |    |        |       |   |        |
|-------------|----|-----------|---|---|--------|--------|----|--------|-------|---|--------|
| rs59565018  | 11 | 120124302 | A | G | -1.076 | 0.2821 | -? | 0      | 0     | 0 | 1      |
| rs10891985  | 11 | 116392191 | T | A | 1.075  | 0.2824 | +  | 0      | 0     | 0 | 1      |
| rs7924948   | 11 | 120498024 | T | C | -1.075 | 0.2825 | -? | 0      | 0     | 0 | 1      |
| rs948468    | 11 | 117962732 | C | G | -1.074 | 0.2826 | -? | 0      | 0     | 0 | 1      |
| rs11603937  | 11 | 117367838 | A | G | 1.074  | 0.2827 | +  | 0      | 0     | 0 | 1      |
| rs12795589  | 11 | 116473704 | G | A | 1.074  | 0.2827 | +  | 0      | 0     | 0 | 1      |
| rs5141      | 11 | 116702123 | T | C | 1.074  | 0.2828 | +  | 0      | 0     | 0 | 1      |
| rs579674    | 11 | 116528224 | G | T | -1.074 | 0.2828 | -? | 0      | 0     | 0 | 1      |
| rs1268833   | 11 | 116694866 | G | A | -1.074 | 0.2829 | -? | 0      | 0     | 0 | 1      |
| rs657539    | 11 | 118572021 | T | C | 1.074  | 0.2829 | ++ | -125.5 | 1.33  | 1 | 0.2488 |
| rs3802884   | 11 | 118889810 | T | C | 1.073  | 0.2832 | +  | 0      | 0     | 0 | 1      |
| rs7128382   | 11 | 117023487 | A | C | 1.073  | 0.2832 | +  | 0      | 0     | 0 | 1      |
| rs59095933  | 11 | 118885161 | A | G | -1.073 | 0.2834 | -- | 0      | 0.327 | 1 | 0.5672 |
| rs677428    | 11 | 119849440 | T | C | -1.073 | 0.2834 | -? | 0      | 0     | 0 | 1      |
| rs7944542   | 11 | 116200726 | G | A | -1.072 | 0.2835 | -? | 0      | 0     | 0 | 1      |
| rs117315666 | 11 | 116937074 | T | G | 1.072  | 0.2837 | +  | 0      | 0     | 0 | 1      |
| rs623500    | 11 | 118828942 | G | A | 1.072  | 0.2837 | +  | 0      | 0     | 0 | 1      |
| rs3133227   | 11 | 120595653 | A | G | 1.072  | 0.2838 | +  | 0      | 0     | 0 | 1      |
| rs10892580  | 11 | 120334149 | A | G | -1.072 | 0.2839 | -? | 0      | 0     | 0 | 1      |
| rs61901404  | 11 | 120606763 | T | C | -1.072 | 0.2839 | -- | 0      | 0.271 | 1 | 0.6026 |
| rs681046    | 11 | 117452212 | C | T | 1.072  | 0.2839 | +  | 0      | 0     | 0 | 1      |
| rs871897    | 11 | 119881446 | T | C | 1.072  | 0.2839 | +  | 0      | 0     | 0 | 1      |
| rs7103570   | 11 | 118964577 | C | T | 1.071  | 0.284  | +  | 0      | 0     | 0 | 1      |
| rs78768102  | 11 | 121141095 | G | A | -1.071 | 0.284  | -? | 0      | 0     | 0 | 1      |
| rs484232    | 11 | 118708564 | T | G | 1.071  | 0.2842 | ++ | 0      | 0.472 | 1 | 0.492  |
| rs78928955  | 11 | 119823254 | C | T | -1.071 | 0.2843 | -? | 0      | 0     | 0 | 1      |
| rs11217868  | 11 | 120305787 | G | A | -1.07  | 0.2844 | -? | 0      | 0     | 0 | 1      |
| rs11217869  | 11 | 120313899 | G | T | -1.07  | 0.2844 | -? | 0      | 0     | 0 | 1      |
| rs12361340  | 11 | 120311409 | A | T | -1.07  | 0.2844 | -? | 0      | 0     | 0 | 1      |
| rs4936467   | 11 | 119086629 | T | A | -1.07  | 0.2847 | -? | 0      | 0     | 0 | 1      |
| rs7105187   | 11 | 118887581 | T | C | -1.07  | 0.2848 | -- | 0      | 0.379 | 1 | 0.5381 |
| rs7105962   | 11 | 119507477 | A | G | 1.07   | 0.2848 | +  | 0      | 0     | 0 | 1      |
| rs2253440   | 11 | 117308795 | A | G | -1.069 | 0.2849 | -? | 0      | 0     | 0 | 1      |
| rs11216045  | 11 | 116492411 | C | T | -1.069 | 0.285  | -? | 0      | 0     | 0 | 1      |
| rs11607944  | 11 | 120282566 | A | G | -1.069 | 0.285  | -? | 0      | 0     | 0 | 1      |
| rs637753    | 11 | 118041894 | C | G | -1.069 | 0.285  | -? | 0      | 0     | 0 | 1      |
| rs72999483  | 11 | 118523799 | C | T | -1.068 | 0.2853 | -- | -33.1  | 2.255 | 1 | 0.1332 |
| rs76474385  | 11 | 117581459 | C | T | 1.068  | 0.2853 | +  | 0      | 0     | 0 | 1      |
| rs10892169  | 11 | 117633054 | A | G | 1.068  | 0.2856 | +  | 0      | 0     | 0 | 1      |
| rs678914    | 11 | 119849798 | C | T | -1.068 | 0.2856 | -? | 0      | 0     | 0 | 1      |
| rs3020913   | 11 | 117831809 | G | A | 1.068  | 0.2857 | ++ | 0      | 0.582 | 1 | 0.4455 |
| rs12286723  | 11 | 118734640 | T | C | -1.067 | 0.2858 | -- | 0      | 0.011 | 1 | 0.9183 |
| rs5142      | 11 | 116701850 | T | C | 1.067  | 0.2859 | +  | 0      | 0     | 0 | 1      |
| rs12796351  | 11 | 116473789 | A | G | 1.067  | 0.2861 | +  | 0      | 0     | 0 | 1      |
| rs35777932  | 11 | 116214441 | C | T | -1.067 | 0.2862 | -- | -144.3 | 1.228 | 1 | 0.2678 |
| rs74586480  | 11 | 117906273 | G | A | 1.066  | 0.2863 | ++ | 0      | 0.001 | 1 | 0.9724 |
| rs11217656  | 11 | 119918703 | A | G | -1.066 | 0.2864 | -? | 0      | 0     | 0 | 1      |
| rs7122959   | 11 | 118804283 | G | A | -1.066 | 0.2864 | -- | 0      | 0.015 | 1 | 0.9027 |
| rs7123066   | 11 | 118804266 | T | C | -1.066 | 0.2864 | -- | 0      | 0.015 | 1 | 0.9027 |
| rs11602796  | 11 | 120268491 | A | G | -1.066 | 0.2865 | -? | 0      | 0     | 0 | 1      |
| rs11216559  | 11 | 117685169 | C | T | 1.065  | 0.2868 | ++ | 0      | 0.175 | 1 | 0.6758 |
| rs112776148 | 11 | 117683284 | C | G | 1.065  | 0.2868 | ++ | 0      | 0.185 | 1 | 0.6668 |
| rs7103418   | 11 | 120581080 | A | C | 1.065  | 0.2868 | +  | 0      | 0     | 0 | 1      |
| rs61362984  | 11 | 116450463 | G | A | -1.065 | 0.287  | -? | 0      | 0     | 0 | 1      |
| rs61898342  | 11 | 120182796 | A | G | -1.065 | 0.287  | -? | 0      | 0     | 0 | 1      |
| rs653788    | 11 | 117910111 | T | C | -1.065 | 0.287  | -? | 0      | 0     | 0 | 1      |

|              |    |           |   |   |        |        |    |        |       |   |        |
|--------------|----|-----------|---|---|--------|--------|----|--------|-------|---|--------|
| rs7119619    | 11 | 120581105 | C | T | 1.065  | 0.287  | +  | 0      | 0     | 0 | 1      |
| rs60954647   | 11 | 116566933 | T | C | 1.064  | 0.2872 | +  | 0      | 0     | 0 | 1      |
| rs10790354   | 11 | 119787531 | T | C | 1.064  | 0.2873 | +  | 0      | 0     | 0 | 1      |
| rs12276890   | 11 | 121112938 | G | C | -1.064 | 0.2873 | -- | 0      | 0.546 | 1 | 0.46   |
| rs3922       | 11 | 118765600 | G | A | -1.064 | 0.2873 | -- | 0      | 0.179 | 1 | 0.6725 |
| rs9665750    | 11 | 119781695 | T | C | -1.064 | 0.2873 | -? | 0      | 0     | 0 | 1      |
| rs11608153   | 11 | 117716663 | G | A | -1.064 | 0.2874 | -? | 0      | 0     | 0 | 1      |
| rs17119975   | 11 | 116634557 | C | T | -1.064 | 0.2874 | +  | 0      | 0.755 | 1 | 0.3848 |
| rs765814     | 11 | 119779799 | T | G | -1.063 | 0.2876 | -? | 0      | 0     | 0 | 1      |
| rs11215933   | 11 | 116312186 | A | C | 1.063  | 0.2877 | +  | 0      | 0     | 0 | 1      |
| rs78809001   | 11 | 119548402 | T | C | 1.063  | 0.2879 | +  | 0      | 0     | 0 | 1      |
| rs4936349    | 11 | 116314370 | G | A | 1.062  | 0.2881 | +  | 0      | 0     | 0 | 1      |
| rs687172     | 11 | 116731260 | A | T | -1.062 | 0.2881 | -? | 0      | 0     | 0 | 1      |
| rs528806     | 11 | 116529914 | T | C | -1.062 | 0.2882 | -? | 0      | 0     | 0 | 1      |
| rs652107     | 11 | 117909799 | G | A | -1.062 | 0.2882 | -- | -194.9 | 1.017 | 1 | 0.3132 |
| rs519356     | 11 | 117350033 | C | T | 1.062  | 0.2884 | +  | 0      | 0     | 0 | 1      |
| rs10736490   | 11 | 117964465 | T | C | -1.061 | 0.2887 | -? | 0      | 0     | 0 | 1      |
| rs10736491   | 11 | 117964490 | T | A | -1.061 | 0.2887 | -? | 0      | 0     | 0 | 1      |
| rs10790361   | 11 | 119844041 | T | C | 1.061  | 0.2887 | +  | 0      | 0     | 0 | 1      |
| rs1941629    | 11 | 117964873 | C | G | -1.061 | 0.2887 | -? | 0      | 0     | 0 | 1      |
| rs1941630    | 11 | 117964902 | C | G | -1.061 | 0.2887 | -? | 0      | 0     | 0 | 1      |
| rs7104016    | 11 | 117964598 | T | G | -1.061 | 0.2887 | -? | 0      | 0     | 0 | 1      |
| rs180329     | 11 | 116622958 | A | G | 1.06   | 0.2889 | +  | -45.2  | 2.067 | 1 | 0.1505 |
| rs12796311   | 11 | 116473730 | T | G | 1.06   | 0.2891 | +  | 0      | 0     | 0 | 1      |
| rs2512153    | 11 | 117889224 | G | A | 1.06   | 0.2891 | +  | -46.9  | 2.042 | 1 | 0.153  |
| rs486978     | 11 | 119789537 | T | G | 1.06   | 0.2891 | +  | 0      | 0     | 0 | 1      |
| rs112704487  | 11 | 119663058 | C | T | 1.06   | 0.2892 | ++ | 0      | 0.099 | 1 | 0.753  |
| rs74908422   | 11 | 120794058 | C | T | -1.059 | 0.2895 | -? | 0      | 0     | 0 | 1      |
| rs111527819  | 11 | 116481175 | A | G | -1.059 | 0.2896 | -? | 0      | 0     | 0 | 1      |
| rs7103021    | 11 | 120580795 | T | C | 1.059  | 0.2896 | +  | 0      | 0     | 0 | 1      |
| rs138159885  | 11 | 117565794 | A | G | 1.059  | 0.2897 | +  | 0      | 0     | 0 | 1      |
| rs150057425  | 11 | 117567237 | G | A | 1.059  | 0.2897 | +  | 0      | 0     | 0 | 1      |
| rs17587869   | 11 | 117565876 | T | G | 1.059  | 0.2897 | +  | 0      | 0     | 0 | 1      |
| rs17664522   | 11 | 117566372 | G | T | 1.059  | 0.2897 | +  | 0      | 0     | 0 | 1      |
| rs35664944   | 11 | 116471898 | A | G | 1.059  | 0.2897 | +  | 0      | 0     | 0 | 1      |
| rs10790291   | 11 | 119232913 | A | G | 1.059  | 0.2898 | +  | 0      | 0     | 0 | 1      |
| rs1268354    | 11 | 116690578 | C | T | -1.059 | 0.2898 | -? | 0      | 0     | 0 | 1      |
| rs540659     | 11 | 117342462 | C | T | -1.059 | 0.2898 | -? | 0      | 0     | 0 | 1      |
| rs4936549    | 11 | 120652075 | C | T | -1.058 | 0.2899 | -? | 0      | 0     | 0 | 1      |
| rs11216734   | 11 | 117921554 | A | T | -1.058 | 0.29   | -? | 0      | 0     | 0 | 1      |
| rs1263177    | 11 | 116690712 | C | T | -1.058 | 0.29   | -? | 0      | 0     | 0 | 1      |
| rs11822103   | 11 | 118869539 | A | G | -1.058 | 0.2901 | -- | 0      | 0.152 | 1 | 0.6963 |
| rs658358     | 11 | 119787190 | C | G | 1.058  | 0.2901 | +  | 0      | 0     | 0 | 1      |
| rs75195561   | 11 | 120397891 | T | C | 1.058  | 0.2901 | +  | 0      | 0     | 0 | 1      |
| rs1039094777 | 11 | 119757789 | T | C | -1.058 | 0.2902 | -? | 0      | 0     | 0 | 1      |
| rs17666283   | 11 | 117685824 | A | G | 1.058  | 0.2902 | ++ | 0      | 0.166 | 1 | 0.6835 |
| rs1209756219 | 11 | 117681924 | C | T | 1.058  | 0.2903 | ++ | 0      | 0.182 | 1 | 0.67   |
| rs2155195    | 11 | 117781618 | G | A | 1.057  | 0.2903 | +  | 0      | 0     | 0 | 1      |
| rs77045391   | 11 | 117885423 | T | C | 1.057  | 0.2903 | +  | 0      | 0     | 0 | 1      |
| rs496958     | 11 | 116528876 | C | T | -1.057 | 0.2904 | -? | 0      | 0     | 0 | 1      |
| rs7129508    | 11 | 121116786 | C | A | -1.057 | 0.2904 | -- | 0      | 0.001 | 1 | 0.9703 |
| rs116848264  | 11 | 118049817 | A | T | 1.057  | 0.2905 | +  | -133.5 | 1.285 | 1 | 0.257  |
| rs180350     | 11 | 116610048 | T | C | 1.057  | 0.2905 | +  | -34.6  | 2.23  | 1 | 0.1354 |
| rs61904846   | 11 | 116449692 | A | G | -1.057 | 0.2906 | -? | 0      | 0     | 0 | 1      |
| rs670294     | 11 | 117935840 | G | T | -1.057 | 0.2906 | -? | 0      | 0     | 0 | 1      |
| rs10892523   | 11 | 119923484 | G | A | -1.056 | 0.2908 | -? | 0      | 0     | 0 | 1      |

|             |    |           |   |   |        |        |    |        |       |   |        |
|-------------|----|-----------|---|---|--------|--------|----|--------|-------|---|--------|
| rs2852238   | 11 | 120784855 | G | C | -1.056 | 0.2908 | -? | 0      | 0     | 0 | 1      |
| rs4936366   | 11 | 117026885 | G | A | 1.056  | 0.2908 | +? | 0      | 0     | 0 | 1      |
| rs12275373  | 11 | 119165129 | T | C | 1.056  | 0.2909 | +? | 0      | 0     | 0 | 1      |
| rs656287    | 11 | 118571790 | G | A | 1.055  | 0.2912 | ++ | -120.6 | 1.36  | 1 | 0.2435 |
| rs79235532  | 11 | 119382089 | A | G | 1.055  | 0.2915 | +? | 0      | 0     | 0 | 1      |
| rs550388    | 11 | 117804926 | C | T | 1.054  | 0.2917 | +? | 0      | 0     | 0 | 1      |
| rs73006585  | 11 | 116943912 | C | G | 1.054  | 0.2917 | +? | 0      | 0     | 0 | 1      |
| rs7934084   | 11 | 120478622 | T | G | 1.054  | 0.2917 | +? | 0      | 0     | 0 | 1      |
| rs4938316   | 11 | 116764582 | T | C | -1.054 | 0.2918 | -? | 0      | 0     | 0 | 1      |
| rs11217847  | 11 | 120247436 | T | C | -1.054 | 0.2919 | -? | 0      | 0     | 0 | 1      |
| rs570083    | 11 | 117343392 | A | G | 1.054  | 0.2919 | +? | 0      | 0     | 0 | 1      |
| rs12805801  | 11 | 120798482 | A | G | -1.054 | 0.292  | -+ | 0      | 0.934 | 1 | 0.3339 |
| rs611217    | 11 | 118572611 | T | C | 1.054  | 0.292  | ++ | -116   | 1.389 | 1 | 0.2386 |
| rs672113    | 11 | 119386594 | C | T | -1.054 | 0.292  | -? | 0      | 0     | 0 | 1      |
| rs7943722   | 11 | 119252448 | T | C | 1.054  | 0.292  | +? | 0      | 0     | 0 | 1      |
| rs588901    | 11 | 119882059 | C | T | 1.054  | 0.2921 | +? | 0      | 0     | 0 | 1      |
| rs7482092   | 11 | 119082706 | C | T | 1.053  | 0.2922 | +? | 0      | 0     | 0 | 1      |
| rs524467    | 11 | 116529641 | G | T | -1.053 | 0.2923 | -? | 0      | 0     | 0 | 1      |
| rs647769    | 11 | 118812512 | T | C | 1.053  | 0.2923 | ++ | -189.1 | 1.038 | 1 | 0.3083 |
| rs7129292   | 11 | 121116638 | A | G | -1.053 | 0.2923 | -- | 0      | 0.001 | 1 | 0.9722 |
| rs11217873  | 11 | 120321653 | T | C | -1.053 | 0.2925 | -? | 0      | 0     | 0 | 1      |
| rs11217861  | 11 | 120288060 | T | C | -1.052 | 0.2927 | -? | 0      | 0     | 0 | 1      |
| rs648067    | 11 | 119949927 | A | C | 1.052  | 0.2929 | +? | 0      | 0     | 0 | 1      |
| rs75210328  | 11 | 118801296 | T | G | -1.052 | 0.2929 | -- | 0      | 0.34  | 1 | 0.5597 |
| rs7926958   | 11 | 117097222 | G | T | -1.052 | 0.2929 | -? | 0      | 0     | 0 | 1      |
| rs90192     | 11 | 117059347 | C | T | 1.052  | 0.2929 | +? | 0      | 0     | 0 | 1      |
| rs12807410  | 11 | 116308355 | A | G | -1.052 | 0.293  | -? | 0      | 0     | 0 | 1      |
| rs11215985  | 11 | 116398764 | G | A | 1.051  | 0.2931 | +? | 0      | 0     | 0 | 1      |
| rs4936529   | 11 | 120476746 | T | A | 1.051  | 0.2931 | +? | 0      | 0     | 0 | 1      |
| rs664657    | 11 | 117349617 | T | C | 1.051  | 0.2931 | +? | 0      | 0     | 0 | 1      |
| rs7115562   | 11 | 117020470 | A | G | 1.051  | 0.2931 | +? | 0      | 0     | 0 | 1      |
| rs7116454   | 11 | 117021134 | A | T | 1.051  | 0.2931 | +? | 0      | 0     | 0 | 1      |
| rs1540191   | 11 | 118090432 | G | A | -1.051 | 0.2932 | -? | 0      | 0     | 0 | 1      |
| rs180344    | 11 | 116613184 | C | T | 1.051  | 0.2932 | +- | -35.6  | 2.212 | 1 | 0.1369 |
| rs190567289 | 11 | 117458098 | T | C | 1.051  | 0.2934 | +? | 0      | 0     | 0 | 1      |
| rs73578545  | 11 | 116496416 | C | T | -1.051 | 0.2934 | -? | 0      | 0     | 0 | 1      |
| rs11218075  | 11 | 120820885 | C | A | 1.05   | 0.2937 | +? | 0      | 0     | 0 | 1      |
| rs1287581   | 11 | 119948738 | T | G | 1.05   | 0.2937 | +? | 0      | 0     | 0 | 1      |
| rs514808    | 11 | 119241120 | A | G | 1.05   | 0.2938 | ++ | -188.9 | 1.039 | 1 | 0.3082 |
| rs685879    | 11 | 119341075 | G | A | -1.05  | 0.2938 | -? | 0      | 0     | 0 | 1      |
| rs7106980   | 11 | 119854322 | G | T | -1.05  | 0.2938 | -? | 0      | 0     | 0 | 1      |
| rs10892526  | 11 | 119930706 | T | C | -1.049 | 0.2941 | -? | 0      | 0     | 0 | 1      |
| rs2512152   | 11 | 117887757 | T | C | 1.049  | 0.2941 | +- | -46.9  | 2.042 | 1 | 0.153  |
| rs67551874  | 11 | 120235574 | C | T | -1.049 | 0.2941 | -? | 0      | 0     | 0 | 1      |
| rs71478235  | 11 | 116214490 | T | C | -1.049 | 0.2943 | -- | -153.9 | 1.181 | 1 | 0.2771 |
| rs56246162  | 11 | 119658388 | G | C | -1.049 | 0.2944 | -? | 0      | 0     | 0 | 1      |
| rs147019067 | 11 | 117600086 | A | C | 1.048  | 0.2945 | +? | 0      | 0     | 0 | 1      |
| rs4938343   | 11 | 117003528 | G | C | 1.048  | 0.2945 | +? | 0      | 0     | 0 | 1      |
| rs580363    | 11 | 116325156 | C | G | -1.048 | 0.2947 | -? | 0      | 0     | 0 | 1      |
| rs9610      | 11 | 117872086 | A | G | -1.047 | 0.2949 | -+ | 0      | 0.974 | 1 | 0.3237 |
| rs10892584  | 11 | 120399726 | T | G | -1.047 | 0.2951 | -? | 0      | 0     | 0 | 1      |
| rs180376    | 11 | 116590039 | C | G | 1.047  | 0.2951 | +- | -32.5  | 2.264 | 1 | 0.1324 |
| rs677027    | 11 | 119849389 | A | G | -1.047 | 0.2951 | -? | 0      | 0     | 0 | 1      |
| rs12274273  | 11 | 116471121 | C | T | 1.047  | 0.2953 | +? | 0      | 0     | 0 | 1      |
| rs12280450  | 11 | 116471149 | G | A | 1.047  | 0.2953 | +? | 0      | 0     | 0 | 1      |
| rs78991803  | 11 | 120161987 | A | G | -1.046 | 0.2955 | -? | 0      | 0     | 0 | 1      |

|              |    |           |   |   |        |        |     |        |       |   |        |
|--------------|----|-----------|---|---|--------|--------|-----|--------|-------|---|--------|
| rs7941202    | 11 | 117653576 | G | C | -1.046 | 0.2956 | -?  | 0      | 0     | 0 | 1      |
| rs7945051    | 11 | 116201218 | C | A | -1.046 | 0.2956 | -?  | 0      | 0     | 0 | 1      |
| rs115933113  | 11 | 120620840 | C | G | 1.046  | 0.2957 | +?  | 0      | 0     | 0 | 1      |
| rs180346     | 11 | 116612659 | C | A | 1.045  | 0.2958 | +-- | -36.2  | 2.203 | 1 | 0.1378 |
| rs142438429  | 11 | 118533042 | T | C | -1.045 | 0.296  | --  | 0      | 0.117 | 1 | 0.7321 |
| rs2510139    | 11 | 119164677 | C | T | -1.045 | 0.296  | -?  | 0      | 0     | 0 | 1      |
| rs634182     | 11 | 119341038 | C | T | -1.045 | 0.296  | -?  | 0      | 0     | 0 | 1      |
| rs655929     | 11 | 119893179 | C | A | 1.045  | 0.2961 | +?  | 0      | 0     | 0 | 1      |
| rs2511854    | 11 | 119146659 | G | C | -1.044 | 0.2963 | -?  | 0      | 0     | 0 | 1      |
| rs117414016  | 11 | 120649337 | T | G | -1.044 | 0.2964 | -?  | 0      | 0     | 0 | 1      |
| rs498736     | 11 | 116485334 | C | G | -1.044 | 0.2964 | -?  | 0      | 0     | 0 | 1      |
| rs544452     | 11 | 118571357 | T | G | 1.044  | 0.2965 | ++  | -122.5 | 1.348 | 1 | 0.2456 |
| rs570949     | 11 | 118571911 | T | G | 1.044  | 0.2965 | ++  | -122.5 | 1.348 | 1 | 0.2456 |
| rs658040     | 11 | 118572171 | G | A | 1.044  | 0.2965 | ++  | -122.5 | 1.348 | 1 | 0.2456 |
| rs948091     | 11 | 121091762 | G | C | 1.044  | 0.2965 | +?  | 0      | 0     | 0 | 1      |
| rs12576276   | 11 | 119337109 | C | T | -1.044 | 0.2966 | -?  | 0      | 0     | 0 | 1      |
| rs11216043   | 11 | 116489979 | C | T | -1.044 | 0.2967 | -?  | 0      | 0     | 0 | 1      |
| rs12288877   | 11 | 117684522 | C | G | 1.044  | 0.2967 | ++  | 0      | 0.175 | 1 | 0.6758 |
| rs12793860   | 11 | 119335915 | T | G | -1.044 | 0.2967 | -?  | 0      | 0     | 0 | 1      |
| rs17492366   | 11 | 116438810 | A | G | -1.043 | 0.2968 | -?  | 0      | 0     | 0 | 1      |
| rs140557493  | 11 | 119474608 | G | C | 1.043  | 0.297  | +?  | 0      | 0     | 0 | 1      |
| rs1939332    | 11 | 119907973 | C | T | -1.042 | 0.2973 | -?  | 0      | 0     | 0 | 1      |
| rs4620730    | 11 | 119507180 | G | C | 1.042  | 0.2973 | +?  | 0      | 0     | 0 | 1      |
| rs149861300  | 11 | 117362331 | C | A | 1.042  | 0.2974 | +?  | 0      | 0     | 0 | 1      |
| rs58174358   | 11 | 120647015 | T | C | 1.041  | 0.2977 | +?  | 0      | 0     | 0 | 1      |
| rs11604012   | 11 | 120292040 | C | T | 1.041  | 0.2978 | ++  | -171.9 | 1.104 | 1 | 0.2935 |
| rs5096       | 11 | 116693095 | G | A | -1.041 | 0.2978 | -?  | 0      | 0     | 0 | 1      |
| rs5100       | 11 | 116692694 | G | A | -1.041 | 0.2978 | -?  | 0      | 0     | 0 | 1      |
| rs7936503    | 11 | 119689251 | T | G | 1.041  | 0.2978 | ++  | 0      | 0.026 | 1 | 0.8716 |
| rs2509049    | 11 | 118966521 | T | C | -1.041 | 0.2979 | -?  | 0      | 0     | 0 | 1      |
| rs684384     | 11 | 120977529 | A | G | 1.041  | 0.2979 | +?  | 0      | 0     | 0 | 1      |
| rs11217837   | 11 | 120232766 | G | A | -1.041 | 0.298  | -?  | 0      | 0     | 0 | 1      |
| rs643536     | 11 | 119788154 | T | C | 1.041  | 0.298  | +?  | 0      | 0     | 0 | 1      |
| rs7118009    | 11 | 118707559 | T | C | -1.041 | 0.298  | --  | 0      | 0.003 | 1 | 0.9587 |
| rs12575295   | 11 | 119337241 | T | C | -1.04  | 0.2984 | -?  | 0      | 0     | 0 | 1      |
| rs488141     | 11 | 118571168 | G | A | 1.04   | 0.2984 | ++  | -121.6 | 1.354 | 1 | 0.2446 |
| rs541631     | 11 | 118571023 | G | A | 1.04   | 0.2984 | ++  | -121.6 | 1.354 | 1 | 0.2446 |
| rs55935223   | 11 | 119337381 | C | T | -1.04  | 0.2984 | -?  | 0      | 0     | 0 | 1      |
| rs57737334   | 11 | 119337436 | T | A | -1.04  | 0.2984 | -?  | 0      | 0     | 0 | 1      |
| rs642224     | 11 | 118570919 | A | G | 1.04   | 0.2984 | ++  | -121.6 | 1.354 | 1 | 0.2446 |
| rs657769     | 11 | 118571316 | T | C | 1.04   | 0.2984 | ++  | -121.6 | 1.354 | 1 | 0.2446 |
| rs658676     | 11 | 118571123 | T | C | 1.04   | 0.2984 | ++  | -121.6 | 1.354 | 1 | 0.2446 |
| rs659564     | 11 | 118570914 | A | C | 1.04   | 0.2984 | ++  | -121.6 | 1.354 | 1 | 0.2446 |
| rs4611216    | 11 | 120472667 | A | G | 1.04   | 0.2985 | +?  | 0      | 0     | 0 | 1      |
| rs74426327   | 11 | 119756067 | C | T | -1.04  | 0.2985 | -?  | 0      | 0     | 0 | 1      |
| rs2298650    | 11 | 119155618 | T | G | 1.039  | 0.2986 | +?  | 0      | 0     | 0 | 1      |
| rs57228309   | 11 | 116502706 | T | A | -1.039 | 0.2986 | -?  | 0      | 0     | 0 | 1      |
| rs8551       | 11 | 118967524 | T | C | -1.039 | 0.2987 | -?  | 0      | 0     | 0 | 1      |
| rs10892125   | 11 | 117355782 | C | A | -1.039 | 0.2988 | -?  | 0      | 0     | 0 | 1      |
| rs2508922    | 11 | 118681088 | A | G | -1.039 | 0.2988 | -+  | 0      | 0.384 | 1 | 0.5353 |
| rs150824999  | 11 | 117564067 | T | C | 1.039  | 0.2989 | +?  | 0      | 0     | 0 | 1      |
| rs4639966    | 11 | 118573519 | C | T | -1.038 | 0.2991 | --  | 0      | 0.008 | 1 | 0.9304 |
| rs2168673    | 11 | 117196901 | A | C | 1.038  | 0.2992 | +?  | 0      | 0     | 0 | 1      |
| rs598696     | 11 | 121006976 | T | A | -1.038 | 0.2992 | -?  | 0      | 0     | 0 | 1      |
| rs73578551   | 11 | 116498120 | T | C | -1.038 | 0.2992 | -?  | 0      | 0     | 0 | 1      |
| rs1013366746 | 11 | 119501639 | T | C | 1.038  | 0.2993 | +?  | 0      | 0     | 0 | 1      |

|             |    |           |   |   |        |        |    |        |       |   |        |
|-------------|----|-----------|---|---|--------|--------|----|--------|-------|---|--------|
| rs1240769   | 11 | 116517591 | G | T | -1.038 | 0.2993 | -? | 0      | 0     | 0 | 1      |
| rs12419730  | 11 | 120816203 | A | G | 1.038  | 0.2995 | +  | 0      | 0     | 0 | 1      |
| rs1892975   | 11 | 120614538 | T | A | 1.038  | 0.2995 | +  | 0      | 0     | 0 | 1      |
| rs965312    | 11 | 119942972 | A | G | -1.038 | 0.2995 | -? | 0      | 0     | 0 | 1      |
| rs2368238   | 11 | 118091761 | T | G | -1.037 | 0.2996 | -? | 0      | 0     | 0 | 1      |
| rs17311233  | 11 | 120157850 | T | C | -1.037 | 0.2997 | -? | 0      | 0     | 0 | 1      |
| rs653177    | 11 | 119337199 | A | G | -1.037 | 0.2998 | -? | 0      | 0     | 0 | 1      |
| rs490460    | 11 | 117163765 | C | A | -1.037 | 0.2999 | -? | 0      | 0     | 0 | 1      |
| rs73578554  | 11 | 116501134 | G | A | -1.037 | 0.2999 | -? | 0      | 0     | 0 | 1      |
| rs7932906   | 11 | 119338245 | T | C | -1.037 | 0.2999 | -? | 0      | 0     | 0 | 1      |
| rs11217527  | 11 | 119697584 | A | G | 1.036  | 0.3    | +  | 0      | 0     | 0 | 1      |
| rs497678    | 11 | 118567881 | C | T | 1.036  | 0.3001 | ++ | -51.4  | 1.981 | 1 | 0.1592 |
| rs7123811   | 11 | 118569469 | G | T | 1.036  | 0.3001 | ++ | -120.8 | 1.359 | 1 | 0.2438 |
| rs10892199  | 11 | 117832675 | A | G | 1.036  | 0.3002 | +  | 0      | 0     | 0 | 1      |
| rs517445    | 11 | 118573535 | G | A | 1.036  | 0.3004 | ++ | -124.6 | 1.336 | 1 | 0.2478 |
| rs9326250   | 11 | 117902620 | A | C | -1.036 | 0.3004 | -? | 0      | 0     | 0 | 1      |
| rs734104    | 11 | 116700860 | C | T | 1.035  | 0.3005 | +  | 0      | 0     | 0 | 1      |
| rs80282202  | 11 | 120986075 | C | G | 1.035  | 0.3005 | +  | 0      | 0     | 0 | 1      |
| rs1546465   | 11 | 119507035 | G | T | 1.035  | 0.3007 | +  | 0      | 0     | 0 | 1      |
| rs1939667   | 11 | 120600151 | T | C | 1.035  | 0.3007 | +  | 0      | 0     | 0 | 1      |
| rs10790138  | 11 | 116209430 | C | G | -1.035 | 0.3008 | -? | 0      | 0     | 0 | 1      |
| rs7115463   | 11 | 121116824 | T | C | -1.035 | 0.3008 | -- | 0      | 0.001 | 1 | 0.9806 |
| rs1939976   | 11 | 117686829 | T | C | 1.034  | 0.3009 | ++ | 0      | 0.146 | 1 | 0.702  |
| rs55683640  | 11 | 120976311 | C | A | -1.034 | 0.301  | -? | 0      | 0     | 0 | 1      |
| rs78198334  | 11 | 116532283 | C | G | -1.034 | 0.3011 | -? | 0      | 0     | 0 | 1      |
| rs10444337  | 11 | 119929276 | A | G | -1.034 | 0.3012 | -? | 0      | 0     | 0 | 1      |
| rs56159851  | 11 | 116271858 | T | C | 1.034  | 0.3013 | +  | 0      | 0     | 0 | 1      |
| rs11216504  | 11 | 117562505 | T | C | 1.033  | 0.3014 | +  | 0      | 0     | 0 | 1      |
| rs12272981  | 11 | 118709600 | G | A | -1.033 | 0.3014 | -- | 0      | 0.002 | 1 | 0.9656 |
| rs73008610  | 11 | 119686252 | C | G | -1.033 | 0.3014 | -? | 0      | 0     | 0 | 1      |
| rs10891961  | 11 | 116196429 | C | T | -1.033 | 0.3015 | -? | 0      | 0     | 0 | 1      |
| rs1263174   | 11 | 116681243 | G | T | -1.033 | 0.3015 | -? | 0      | 0     | 0 | 1      |
| rs184243297 | 11 | 120874890 | A | G | -1.033 | 0.3015 | -? | 0      | 0     | 0 | 1      |
| rs11218235  | 11 | 121144673 | T | C | -1.033 | 0.3016 | -- | 0      | 0.294 | 1 | 0.5874 |
| rs75243489  | 11 | 116457115 | A | T | -1.033 | 0.3016 | -? | 0      | 0     | 0 | 1      |
| rs11215897  | 11 | 116196643 | G | A | -1.033 | 0.3017 | -? | 0      | 0     | 0 | 1      |
| rs58499675  | 11 | 117574923 | C | T | 1.033  | 0.3018 | +  | 0      | 0     | 0 | 1      |
| rs141169729 | 11 | 118510642 | T | C | -1.032 | 0.3019 | -- | 0      | 0.01  | 1 | 0.9204 |
| rs611733    | 11 | 118572760 | T | C | 1.032  | 0.3019 | ++ | -126.9 | 1.322 | 1 | 0.2502 |
| rs1005705   | 11 | 116549116 | C | A | -1.032 | 0.3021 | -? | 0      | 0     | 0 | 1      |
| rs108533    | 11 | 116601711 | T | A | 1.032  | 0.3021 | +- | -40.2  | 2.14  | 1 | 0.1435 |
| rs116944258 | 11 | 116546633 | A | C | -1.032 | 0.3021 | -? | 0      | 0     | 0 | 1      |
| rs117830617 | 11 | 116549971 | A | G | -1.032 | 0.3021 | -? | 0      | 0     | 0 | 1      |
| rs12793594  | 11 | 118569900 | C | T | 1.032  | 0.3021 | ++ | -119.9 | 1.364 | 1 | 0.2428 |
| rs482889    | 11 | 118570098 | T | G | 1.032  | 0.3021 | ++ | -119.9 | 1.364 | 1 | 0.2428 |
| rs523793    | 11 | 118570697 | T | C | 1.032  | 0.3021 | ++ | -119.9 | 1.364 | 1 | 0.2428 |
| rs554456    | 11 | 118570062 | C | T | 1.032  | 0.3021 | ++ | -119.9 | 1.364 | 1 | 0.2428 |
| rs7108144   | 11 | 118569694 | A | G | 1.032  | 0.3021 | ++ | -119.9 | 1.364 | 1 | 0.2428 |
| rs79493947  | 11 | 119810375 | G | C | -1.032 | 0.3021 | -? | 0      | 0     | 0 | 1      |
| rs79678269  | 11 | 116548972 | C | G | -1.032 | 0.3021 | -? | 0      | 0     | 0 | 1      |
| rs673547    | 11 | 118573339 | A | G | 1.032  | 0.3022 | ++ | -127.3 | 1.32  | 1 | 0.2506 |
| rs606683    | 11 | 117904127 | G | C | -1.032 | 0.3023 | -- | 0      | 0.189 | 1 | 0.6639 |
| rs10891999  | 11 | 116488882 | T | A | -1.031 | 0.3027 | -? | 0      | 0     | 0 | 1      |
| rs76235142  | 11 | 116480813 | A | G | -1.031 | 0.3027 | -? | 0      | 0     | 0 | 1      |
| rs573396    | 11 | 119239375 | G | A | 1.03   | 0.3028 | +  | 0      | 0     | 0 | 1      |
| rs74888816  | 11 | 118897962 | T | C | 1.029  | 0.3033 | +  | 0      | 0     | 0 | 1      |

|             |    |           |   |   |        |        |    |        |       |   |        |
|-------------|----|-----------|---|---|--------|--------|----|--------|-------|---|--------|
| rs552079    | 11 | 118573022 | C | T | 1.029  | 0.3034 | ++ | -129   | 1.31  | 1 | 0.2524 |
| rs58601794  | 11 | 118884726 | C | T | -1.029 | 0.3035 | -- | 0      | 0.229 | 1 | 0.6324 |
| rs10732855  | 11 | 116209589 | C | G | -1.029 | 0.3036 | -? | 0      | 0     | 0 | 1      |
| rs10891962  | 11 | 116196666 | C | T | -1.029 | 0.3036 | -? | 0      | 0     | 0 | 1      |
| rs11215896  | 11 | 116196502 | A | C | -1.029 | 0.3036 | -? | 0      | 0     | 0 | 1      |
| rs628861    | 11 | 119925575 | A | C | -1.029 | 0.3037 | -? | 0      | 0     | 0 | 1      |
| rs1240513   | 11 | 116528202 | T | A | -1.028 | 0.3038 | -? | 0      | 0     | 0 | 1      |
| rs7932565   | 11 | 119219913 | G | A | 1.027  | 0.3043 | +? | 0      | 0     | 0 | 1      |
| rs10790231  | 11 | 117967476 | C | T | -1.027 | 0.3046 | -? | 0      | 0     | 0 | 1      |
| rs4938717   | 11 | 119576911 | T | C | -1.027 | 0.3046 | -? | 0      | 0     | 0 | 1      |
| rs612941    | 11 | 117934115 | C | A | -1.027 | 0.3046 | -? | 0      | 0     | 0 | 1      |
| rs67023719  | 11 | 117282742 | T | C | 1.027  | 0.3046 | +? | 0      | 0     | 0 | 1      |
| rs10892184  | 11 | 117707229 | T | C | -1.026 | 0.3048 | -? | 0      | 0     | 0 | 1      |
| rs7759      | 11 | 118967291 | G | A | -1.026 | 0.3049 | -? | 0      | 0     | 0 | 1      |
| rs10736483  | 11 | 116210084 | A | G | -1.026 | 0.3051 | -? | 0      | 0     | 0 | 1      |
| rs11217988  | 11 | 120581395 | C | T | 1.025  | 0.3052 | +? | 0      | 0     | 0 | 1      |
| rs1508102   | 11 | 116379889 | A | G | -1.025 | 0.3052 | -? | 0      | 0     | 0 | 1      |
| rs60651507  | 11 | 118751898 | A | G | 1.025  | 0.3052 | ++ | 0      | 0.001 | 1 | 0.9783 |
| rs61898767  | 11 | 120353153 | G | A | -1.025 | 0.3052 | -? | 0      | 0     | 0 | 1      |
| rs10891963  | 11 | 116196711 | G | T | -1.025 | 0.3053 | -? | 0      | 0     | 0 | 1      |
| rs2028960   | 11 | 119697626 | T | C | -1.025 | 0.3053 | -? | 0      | 0     | 0 | 1      |
| rs144188664 | 11 | 116541034 | T | A | -1.025 | 0.3055 | -? | 0      | 0     | 0 | 1      |
| rs144256947 | 11 | 116543025 | C | T | -1.025 | 0.3055 | -? | 0      | 0     | 0 | 1      |
| rs148462279 | 11 | 116542737 | G | A | -1.025 | 0.3055 | -? | 0      | 0     | 0 | 1      |
| rs665406    | 11 | 117347058 | C | T | -1.024 | 0.3056 | -? | 0      | 0     | 0 | 1      |
| rs73001093  | 11 | 119440387 | T | G | 1.024  | 0.3056 | +? | 0      | 0     | 0 | 1      |
| rs11828580  | 11 | 117923983 | A | G | -1.024 | 0.3057 | -? | 0      | 0     | 0 | 1      |
| rs45506400  | 11 | 117164246 | C | A | 1.024  | 0.3057 | +? | 0      | 0     | 0 | 1      |
| rs1396131   | 11 | 116395458 | C | A | -1.024 | 0.3059 | -? | 0      | 0     | 0 | 1      |
| rs11217796  | 11 | 120162250 | G | A | -1.023 | 0.3061 | -? | 0      | 0     | 0 | 1      |
| rs2051480   | 11 | 118094513 | A | G | -1.023 | 0.3063 | -? | 0      | 0     | 0 | 1      |
| rs6589721   | 11 | 119081215 | T | C | -1.023 | 0.3063 | -? | 0      | 0     | 0 | 1      |
| rs10891974  | 11 | 116302144 | T | C | -1.023 | 0.3064 | -? | 0      | 0     | 0 | 1      |
| rs11216425  | 11 | 117363426 | A | C | 1.022  | 0.3067 | +? | 0      | 0     | 0 | 1      |
| rs662318    | 11 | 119848438 | G | A | -1.022 | 0.3068 | -? | 0      | 0     | 0 | 1      |
| rs619115    | 11 | 120987253 | C | T | 1.022  | 0.307  | +? | 0      | 0     | 0 | 1      |
| rs597124    | 11 | 119949821 | T | C | 1.021  | 0.3072 | +? | 0      | 0     | 0 | 1      |
| rs600720    | 11 | 119948997 | T | C | 1.021  | 0.3072 | +? | 0      | 0     | 0 | 1      |
| rs649921    | 11 | 119949498 | T | G | 1.021  | 0.3072 | +? | 0      | 0     | 0 | 1      |
| rs662549    | 11 | 119947801 | C | T | 1.021  | 0.3072 | +? | 0      | 0     | 0 | 1      |
| rs2155811   | 11 | 120164799 | C | G | -1.021 | 0.3074 | -? | 0      | 0     | 0 | 1      |
| rs143620404 | 11 | 117941082 | T | G | 1.021  | 0.3075 | ++ | 0      | 0.01  | 1 | 0.9213 |
| rs2509851   | 11 | 118966780 | C | A | -1.02  | 0.3078 | -? | 0      | 0     | 0 | 1      |
| rs948376    | 11 | 121092505 | C | T | 1.02   | 0.3078 | +? | 0      | 0     | 0 | 1      |
| rs661621    | 11 | 119944195 | T | A | 1.02   | 0.3079 | +? | 0      | 0     | 0 | 1      |
| rs745517    | 11 | 121092052 | C | T | 1.02   | 0.3079 | +? | 0      | 0     | 0 | 1      |
| rs34068367  | 11 | 116479185 | A | C | -1.019 | 0.308  | -? | 0      | 0     | 0 | 1      |
| rs600620    | 11 | 117458539 | G | A | 1.019  | 0.308  | +? | 0      | 0     | 0 | 1      |
| rs61897924  | 11 | 119903718 | T | C | -1.019 | 0.308  | -? | 0      | 0     | 0 | 1      |
| rs17124120  | 11 | 120505628 | T | C | 1.019  | 0.3081 | +? | 0      | 0     | 0 | 1      |
| rs12276544  | 11 | 120117951 | A | T | -1.019 | 0.3082 | -? | 0      | 0     | 0 | 1      |
| rs511451    | 11 | 118568639 | T | C | 1.018  | 0.3086 | ++ | -122.1 | 1.351 | 1 | 0.2452 |
| rs61016803  | 11 | 119697261 | A | T | -1.018 | 0.3086 | -? | 0      | 0     | 0 | 1      |
| rs610226    | 11 | 117688225 | G | C | 1.018  | 0.3086 | +? | 0      | 0     | 0 | 1      |
| rs10444338  | 11 | 119929445 | C | T | -1.018 | 0.3089 | -? | 0      | 0     | 0 | 1      |
| rs638775    | 11 | 120977922 | G | C | 1.018  | 0.3089 | +? | 0      | 0     | 0 | 1      |

|             |    |           |   |   |        |        |    |       |       |   |        |
|-------------|----|-----------|---|---|--------|--------|----|-------|-------|---|--------|
| rs17124305  | 11 | 120646975 | G | A | 1.017  | 0.309  | +  | 0     | 0     | 0 | 1      |
| rs12420994  | 11 | 117846083 | G | C | -1.017 | 0.3091 | -- | 0     | 0.012 | 1 | 0.9128 |
| rs3133856   | 11 | 120584612 | C | T | -1.017 | 0.3091 | -? | 0     | 0     | 0 | 1      |
| rs2929176   | 11 | 117106282 | C | T | -1.017 | 0.3092 | -? | 0     | 0     | 0 | 1      |
| rs3016582   | 11 | 117106280 | A | T | -1.017 | 0.3092 | -? | 0     | 0     | 0 | 1      |
| rs949138    | 11 | 117330669 | G | A | 1.017  | 0.3092 | +  | 0     | 0     | 0 | 1      |
| rs35508996  | 11 | 119502547 | A | G | 1.017  | 0.3093 | +  | 0     | 0     | 0 | 1      |
| rs73024427  | 11 | 117803627 | T | C | 1.017  | 0.3093 | +  | 0     | 0     | 0 | 1      |
| rs11218069  | 11 | 120816408 | A | C | 1.016  | 0.3095 | +  | 0     | 0     | 0 | 1      |
| rs56329702  | 11 | 120222475 | T | C | -1.016 | 0.3095 | -? | 0     | 0     | 0 | 1      |
| rs11217662  | 11 | 119924999 | T | A | -1.016 | 0.3096 | -? | 0     | 0     | 0 | 1      |
| rs7117145   | 11 | 116531969 | T | A | -1.016 | 0.3096 | -? | 0     | 0     | 0 | 1      |
| rs1145186   | 11 | 116528660 | A | T | -1.016 | 0.3097 | -? | 0     | 0     | 0 | 1      |
| rs35200015  | 11 | 117383215 | A | G | -1.016 | 0.3097 | -? | 0     | 0     | 0 | 1      |
| rs148108200 | 11 | 116480236 | C | T | -1.016 | 0.3098 | -? | 0     | 0     | 0 | 1      |
| rs3741301   | 11 | 116631391 | C | T | 1.016  | 0.3098 | +- | -65.9 | 1.809 | 1 | 0.1787 |
| rs1939127   | 11 | 117890681 | C | T | 1.015  | 0.3099 | +- | -49.1 | 2.012 | 1 | 0.1561 |
| rs116987336 | 11 | 117175658 | A | G | 1.015  | 0.31   | +  | 0     | 0     | 0 | 1      |
| rs4999180   | 11 | 121092522 | T | C | 1.015  | 0.31   | +  | 0     | 0     | 0 | 1      |
| rs78577252  | 11 | 116492477 | T | C | -1.015 | 0.31   | -? | 0     | 0     | 0 | 1      |
| rs10892325  | 11 | 118912702 | C | T | 1.015  | 0.3101 | +  | 0     | 0     | 0 | 1      |
| rs11607355  | 11 | 118093547 | C | T | -1.015 | 0.3101 | -? | 0     | 0     | 0 | 1      |
| rs7101613   | 11 | 117572288 | G | A | 1.015  | 0.3101 | +  | 0     | 0     | 0 | 1      |
| rs10750090  | 11 | 116209785 | C | T | -1.015 | 0.3102 | -? | 0     | 0     | 0 | 1      |
| rs948092    | 11 | 121091888 | C | T | 1.015  | 0.3102 | +  | 0     | 0     | 0 | 1      |
| rs12419497  | 11 | 119334628 | T | C | -1.015 | 0.3103 | -? | 0     | 0     | 0 | 1      |
| rs12419764  | 11 | 121134395 | G | A | -1.014 | 0.3106 | -- | 0     | 0.217 | 1 | 0.6412 |
| rs11218068  | 11 | 120816319 | C | T | 1.014  | 0.3108 | +  | 0     | 0     | 0 | 1      |
| rs12280288  | 11 | 118892940 | C | T | -1.014 | 0.3108 | -- | 0     | 0.059 | 1 | 0.8087 |
| rs12366111  | 11 | 117990553 | C | T | -1.013 | 0.3108 | -- | 0     | 0.369 | 1 | 0.5435 |
| rs10736485  | 11 | 116210182 | G | C | -1.013 | 0.3109 | -? | 0     | 0     | 0 | 1      |
| rs11217474  | 11 | 119631726 | G | C | -1.013 | 0.311  | -? | 0     | 0     | 0 | 1      |
| rs11216443  | 11 | 117409700 | A | C | 1.013  | 0.3111 | +  | 0     | 0     | 0 | 1      |
| rs675929    | 11 | 117892050 | A | G | 1.013  | 0.3111 | +- | -45.8 | 2.057 | 1 | 0.1515 |
| rs4938352   | 11 | 117027481 | G | A | 1.013  | 0.3112 | +  | 0     | 0     | 0 | 1      |
| rs1893264   | 11 | 119193721 | C | A | -1.012 | 0.3113 | -? | 0     | 0     | 0 | 1      |
| rs147507811 | 11 | 116854683 | A | C | 1.012  | 0.3115 | +  | 0     | 0     | 0 | 1      |
| rs1944496   | 11 | 119879488 | A | G | -1.012 | 0.3115 | -? | 0     | 0     | 0 | 1      |
| rs4938348   | 11 | 117021877 | G | C | 1.012  | 0.3115 | +  | 0     | 0     | 0 | 1      |
| rs12099002  | 11 | 117571475 | A | G | 1.012  | 0.3116 | +  | 0     | 0     | 0 | 1      |
| rs11827471  | 11 | 120122394 | G | A | -1.011 | 0.3118 | -? | 0     | 0     | 0 | 1      |
| rs2508449   | 11 | 117890273 | C | T | 1.011  | 0.3119 | +- | -47.6 | 2.033 | 1 | 0.1539 |
| rs56249090  | 11 | 117810532 | A | C | 1.011  | 0.3119 | +  | 0     | 0     | 0 | 1      |
| rs11217496  | 11 | 119648956 | T | G | -1.011 | 0.312  | -? | 0     | 0     | 0 | 1      |
| rs11218062  | 11 | 120804014 | C | T | -1.011 | 0.312  | -+ | 0     | 0.903 | 1 | 0.3419 |
| rs76046245  | 11 | 120193461 | A | C | -1.011 | 0.3122 | -? | 0     | 0     | 0 | 1      |
| rs2186621   | 11 | 120821263 | C | T | 1.01   | 0.3124 | +  | 0     | 0     | 0 | 1      |
| rs4936416   | 11 | 117896454 | A | G | -1.01  | 0.3124 | -? | 0     | 0     | 0 | 1      |
| rs10790151  | 11 | 116452887 | T | C | 1.01   | 0.3125 | +  | 0     | 0     | 0 | 1      |
| rs11217629  | 11 | 119880076 | A | C | -1.01  | 0.3126 | -? | 0     | 0     | 0 | 1      |
| rs11217872  | 11 | 120321201 | C | G | -1.01  | 0.3126 | -? | 0     | 0     | 0 | 1      |
| rs948466    | 11 | 117966100 | A | G | -1.01  | 0.3126 | -? | 0     | 0     | 0 | 1      |
| rs4938645   | 11 | 119163319 | G | A | 1.009  | 0.3129 | +  | 0     | 0     | 0 | 1      |
| rs61381062  | 11 | 118884708 | A | G | -1.009 | 0.313  | -- | 0     | 0.206 | 1 | 0.6499 |
| rs57877069  | 11 | 119962800 | C | G | 1.009  | 0.3132 | +  | 0     | 0     | 0 | 1      |
| rs7120309   | 11 | 117042816 | T | A | 1.009  | 0.3132 | +  | 0     | 0     | 0 | 1      |

|            |    |           |   |   |        |        |    |        |       |   |        |
|------------|----|-----------|---|---|--------|--------|----|--------|-------|---|--------|
| rs7120449  | 11 | 117042899 | T | C | 1.009  | 0.3132 | +  | 0      | 0     | 0 | 1      |
| rs7124732  | 11 | 119959273 | G | A | 1.009  | 0.3132 | +  | 0      | 0     | 0 | 1      |
| rs11215966 | 11 | 116366547 | C | T | -1.008 | 0.3133 | -  | 0      | 0     | 0 | 1      |
| rs1145192  | 11 | 116570894 | A | G | -1.008 | 0.3133 | -  | 0      | 0     | 0 | 1      |
| rs36119355 | 11 | 117845195 | T | G | 1.008  | 0.3134 | ++ | 0      | 0.522 | 1 | 0.47   |
| rs1892947  | 11 | 116530061 | A | G | -1.008 | 0.3135 | -  | 0      | 0     | 0 | 1      |
| rs2727793  | 11 | 116683374 | C | T | -1.008 | 0.3136 | -  | 0      | 0     | 0 | 1      |
| rs7930793  | 11 | 119825176 | G | T | -1.007 | 0.3137 | -  | 0      | 0     | 0 | 1      |
| rs10892471 | 11 | 119679283 | A | G | 1.007  | 0.3138 | ++ | 0      | 0.025 | 1 | 0.8744 |
| rs564989   | 11 | 117709754 | C | T | -1.007 | 0.3138 | -  | 0      | 0     | 0 | 1      |
| rs11217989 | 11 | 120583983 | C | T | 1.007  | 0.314  | +  | 0      | 0     | 0 | 1      |
| rs493721   | 11 | 116247770 | G | A | -1.007 | 0.314  | -  | 0      | 0     | 0 | 1      |
| rs536648   | 11 | 117143185 | G | C | -1.007 | 0.3141 | -  | 0      | 0     | 0 | 1      |
| rs540277   | 11 | 117362074 | T | C | 1.007  | 0.3141 | +  | 0      | 0     | 0 | 1      |
| rs4938347  | 11 | 117021759 | T | A | 1.006  | 0.3142 | +  | 0      | 0     | 0 | 1      |
| rs4938350  | 11 | 117022276 | A | G | 1.006  | 0.3142 | +  | 0      | 0     | 0 | 1      |
| rs76499613 | 11 | 119829348 | C | T | -1.006 | 0.3142 | -  | 0      | 0     | 0 | 1      |
| rs78289484 | 11 | 119870561 | T | C | 1.006  | 0.3142 | +  | 0      | 0     | 0 | 1      |
| rs2256111  | 11 | 117864047 | A | G | 1.006  | 0.3143 | ++ | 0      | 0.288 | 1 | 0.5916 |
| rs61659529 | 11 | 116533628 | G | A | -1.006 | 0.3143 | -  | 0      | 0     | 0 | 1      |
| rs75942205 | 11 | 116533595 | C | T | -1.006 | 0.3143 | -  | 0      | 0     | 0 | 1      |
| rs1263173  | 11 | 116681008 | G | A | -1.006 | 0.3145 | -  | 0      | 0     | 0 | 1      |
| rs2186882  | 11 | 119168370 | A | G | 1.006  | 0.3145 | +  | 0      | 0     | 0 | 1      |
| rs11217421 | 11 | 119583751 | C | T | -1.006 | 0.3146 | -  | 0      | 0     | 0 | 1      |
| rs554233   | 11 | 117194929 | G | A | 1.005  | 0.3147 | +  | 0      | 0     | 0 | 1      |
| rs627532   | 11 | 120826131 | C | T | -1.005 | 0.3148 | -  | 0      | 0     | 0 | 1      |
| rs7935678  | 11 | 119665733 | C | T | 1.005  | 0.3148 | +  | 0      | 0     | 0 | 1      |
| rs11218199 | 11 | 121064524 | T | C | -1.005 | 0.3149 | -  | 0      | 0     | 0 | 1      |
| rs1893969  | 11 | 117432434 | T | C | 1.005  | 0.3151 | +  | 0      | 0     | 0 | 1      |
| rs3819210  | 11 | 117389517 | G | A | -1.005 | 0.3151 | -  | 0      | 0     | 0 | 1      |
| rs11217678 | 11 | 119951347 | C | G | -1.004 | 0.3154 | -  | 0      | 0     | 0 | 1      |
| rs7126476  | 11 | 118834784 | G | A | -1.004 | 0.3154 | -  | 0      | 0     | 0 | 1      |
| rs1939666  | 11 | 120600346 | G | A | 1.004  | 0.3156 | +  | 0      | 0     | 0 | 1      |
| rs672295   | 11 | 119894514 | G | A | 1.003  | 0.3157 | +  | 0      | 0     | 0 | 1      |
| rs688587   | 11 | 118032242 | A | C | 1.003  | 0.3157 | +  | 0      | 0     | 0 | 1      |
| rs750057   | 11 | 116203045 | G | A | -1.003 | 0.3157 | -  | 0      | 0     | 0 | 1      |
| rs7926229  | 11 | 119675718 | C | T | 1.003  | 0.3157 | +  | 0      | 0     | 0 | 1      |
| rs2512156  | 11 | 117891216 | T | A | 1.003  | 0.3158 | +  | -44.7  | 2.074 | 1 | 0.1499 |
| rs489126   | 11 | 118572747 | A | G | 1.003  | 0.3159 | ++ | -148.6 | 1.207 | 1 | 0.272  |
| rs9651687  | 11 | 117967986 | A | T | -1.003 | 0.3159 | -  | 0      | 0     | 0 | 1      |
| rs2155130  | 11 | 117506565 | C | T | 1.003  | 0.3161 | +  | 0      | 0     | 0 | 1      |
| rs11215963 | 11 | 116361658 | G | C | 1.002  | 0.3162 | +  | 0      | 0     | 0 | 1      |
| rs1632755  | 11 | 116538851 | C | A | -1.002 | 0.3163 | -  | 0      | 0     | 0 | 1      |
| rs180361   | 11 | 116598649 | T | C | 1.002  | 0.3164 | +  | -37.4  | 2.183 | 1 | 0.1396 |
| rs180365   | 11 | 116596174 | T | C | 1.002  | 0.3165 | +  | -37.2  | 2.186 | 1 | 0.1392 |
| rs2071523  | 11 | 116697344 | C | T | -1.002 | 0.3165 | -  | 0      | 0     | 0 | 1      |
| rs6589826  | 11 | 120517643 | A | G | -1.002 | 0.3165 | -  | 0      | 0     | 0 | 1      |
| rs7121901  | 11 | 119824699 | T | C | -1.002 | 0.3165 | -  | 0      | 0     | 0 | 1      |
| rs10892353 | 11 | 119221449 | A | G | -1.001 | 0.3166 | -  | 0      | 0     | 0 | 1      |
| rs563372   | 11 | 119767864 | G | A | -1.001 | 0.3166 | -  | 0      | 0     | 0 | 1      |
| rs688563   | 11 | 118032228 | C | T | 1.001  | 0.3166 | +  | 0      | 0     | 0 | 1      |
| rs7927239  | 11 | 116326570 | C | G | -1.001 | 0.3167 | -  | 0      | 0     | 0 | 1      |
| rs7932145  | 11 | 119219819 | A | C | 1.001  | 0.3168 | +  | 0      | 0     | 0 | 1      |
| rs1786186  | 11 | 117945632 | T | C | -1.001 | 0.3169 | -  | 0      | 0     | 0 | 1      |
| rs17509752 | 11 | 117432779 | T | C | 1.001  | 0.317  | +  | 0      | 0     | 0 | 1      |
| rs61900957 | 11 | 118501723 | T | C | 1.001  | 0.317  | ++ | -24.3  | 2.414 | 1 | 0.1203 |

|              |    |           |   |   |        |        |    |        |       |   |        |
|--------------|----|-----------|---|---|--------|--------|----|--------|-------|---|--------|
| rs12416826   | 11 | 118165955 | C | T | 1      | 0.3172 | +  | 0      | 0     | 0 | 1      |
| rs3737504    | 11 | 118869460 | G | A | -1     | 0.3172 | -- | 0      | 0.06  | 1 | 0.8072 |
| rs78347813   | 11 | 116529130 | T | C | -1     | 0.3172 | -? | 0      | 0     | 0 | 1      |
| rs2195525    | 11 | 119235404 | C | T | 1      | 0.3173 | +  | 0      | 0     | 0 | 1      |
| rs643788     | 11 | 118967758 | C | T | -1     | 0.3173 | -? | 0      | 0     | 0 | 1      |
| rs505848     | 11 | 116484741 | T | C | 0.999  | 0.3176 | +  | 0      | 0     | 0 | 1      |
| rs562422     | 11 | 117428278 | A | G | -0.999 | 0.3176 | -? | 0      | 0     | 0 | 1      |
| rs7130852    | 11 | 117571426 | G | A | 0.999  | 0.3176 | +  | 0      | 0     | 0 | 1      |
| rs1375742714 | 11 | 119146129 | C | T | 0.999  | 0.3177 | +  | 0      | 0     | 0 | 1      |
| rs1783855    | 11 | 117914504 | A | C | -0.999 | 0.3177 | -- | 0      | 0.145 | 1 | 0.7034 |
| rs2216311    | 11 | 116696043 | G | A | -0.999 | 0.3177 | -? | 0      | 0     | 0 | 1      |
| rs2887378    | 11 | 119916226 | A | G | -0.999 | 0.3177 | -? | 0      | 0     | 0 | 1      |
| rs2367794    | 11 | 116198031 | G | A | -0.999 | 0.3179 | -? | 0      | 0     | 0 | 1      |
| rs113863182  | 11 | 119220395 | T | C | 0.999  | 0.318  | +  | 0      | 0     | 0 | 1      |
| rs1508103    | 11 | 116379978 | G | A | -0.998 | 0.3183 | -? | 0      | 0     | 0 | 1      |
| rs117014628  | 11 | 116535631 | T | C | -0.998 | 0.3184 | -? | 0      | 0     | 0 | 1      |
| rs118103820  | 11 | 116537116 | G | A | -0.998 | 0.3184 | -? | 0      | 0     | 0 | 1      |
| rs140973748  | 11 | 116537798 | C | T | -0.998 | 0.3184 | -? | 0      | 0     | 0 | 1      |
| rs143380339  | 11 | 116538103 | A | C | -0.998 | 0.3184 | -? | 0      | 0     | 0 | 1      |
| rs190069353  | 11 | 116535624 | A | C | -0.998 | 0.3184 | -? | 0      | 0     | 0 | 1      |
| rs76547220   | 11 | 116534550 | G | T | -0.998 | 0.3184 | -? | 0      | 0     | 0 | 1      |
| rs77226464   | 11 | 116535435 | T | C | -0.998 | 0.3184 | -? | 0      | 0     | 0 | 1      |
| rs79063991   | 11 | 116536820 | T | C | -0.998 | 0.3184 | -? | 0      | 0     | 0 | 1      |
| rs79291519   | 11 | 116533310 | T | C | -0.997 | 0.3186 | -? | 0      | 0     | 0 | 1      |
| rs588763     | 11 | 117116781 | G | A | -0.997 | 0.3188 | -? | 0      | 0     | 0 | 1      |
| rs2515793    | 11 | 117815759 | A | G | -0.996 | 0.3191 | -? | 0      | 0     | 0 | 1      |
| rs12286525   | 11 | 117116450 | G | A | 0.996  | 0.3192 | +  | 0      | 0     | 0 | 1      |
| rs59608621   | 11 | 118885163 | G | A | -0.996 | 0.3192 | -- | 0      | 0.188 | 1 | 0.6644 |
| rs7479114    | 11 | 118568813 | T | C | 0.996  | 0.3192 | ++ | -131   | 1.299 | 1 | 0.2544 |
| rs12289816   | 11 | 116519950 | C | T | -0.996 | 0.3193 | -? | 0      | 0     | 0 | 1      |
| rs2298724    | 11 | 120823721 | G | A | -0.996 | 0.3193 | -? | 0      | 0     | 0 | 1      |
| rs56984853   | 11 | 117238478 | A | G | 0.994  | 0.3201 | +  | 0      | 0     | 0 | 1      |
| rs3133861    | 11 | 120659485 | T | G | 0.994  | 0.3202 | +  | 0      | 0     | 0 | 1      |
| rs4938736    | 11 | 119760977 | A | G | -0.994 | 0.3202 | -? | 0      | 0     | 0 | 1      |
| rs11216949   | 11 | 118568668 | T | C | 0.994  | 0.3203 | ++ | -132.7 | 1.289 | 1 | 0.2562 |
| rs12791838   | 11 | 118144209 | A | G | 0.994  | 0.3203 | +  | 0      | 0     | 0 | 1      |
| rs1630252    | 11 | 117952899 | C | T | -0.994 | 0.3204 | -? | 0      | 0     | 0 | 1      |
| rs73014974   | 11 | 118028648 | T | C | 0.994  | 0.3204 | +  | 0      | 0     | 0 | 1      |
| rs7113018    | 11 | 120804533 | G | T | 0.993  | 0.3207 | +  | 0      | 0     | 0 | 1      |
| rs117293980  | 11 | 116531475 | G | T | -0.993 | 0.3209 | -? | 0      | 0     | 0 | 1      |
| rs117889066  | 11 | 116531050 | C | G | -0.993 | 0.3209 | -? | 0      | 0     | 0 | 1      |
| rs9651691    | 11 | 119527227 | T | G | 0.993  | 0.3209 | +  | 0      | 0     | 0 | 1      |
| rs10790225   | 11 | 117805786 | T | C | 0.992  | 0.321  | ++ | -185.6 | 1.05  | 1 | 0.3054 |
| rs2100357    | 11 | 119915395 | T | C | -0.992 | 0.3212 | -? | 0      | 0     | 0 | 1      |
| rs369816532  | 11 | 118887887 | T | G | -0.992 | 0.3212 | -- | 0      | 0.371 | 1 | 0.5422 |
| rs906546     | 11 | 116389102 | T | C | 0.992  | 0.3212 | +  | 0      | 0     | 0 | 1      |
| rs79995246   | 11 | 119769724 | C | T | -0.992 | 0.3213 | -? | 0      | 0     | 0 | 1      |
| rs591221     | 11 | 121090597 | G | A | 0.992  | 0.3214 | +  | 0      | 0     | 0 | 1      |
| rs7934092    | 11 | 120643090 | A | C | 0.991  | 0.3216 | +  | 0      | 0     | 0 | 1      |
| rs523366     | 11 | 117119552 | A | G | -0.991 | 0.3218 | -? | 0      | 0     | 0 | 1      |
| rs550999     | 11 | 118811684 | G | C | 0.991  | 0.3218 | ++ | 0      | 0.895 | 1 | 0.344  |
| rs649586     | 11 | 119885674 | G | C | -0.991 | 0.3218 | -? | 0      | 0     | 0 | 1      |
| rs117170835  | 11 | 120131553 | A | G | -0.99  | 0.3222 | -? | 0      | 0     | 0 | 1      |
| rs2542063    | 11 | 116684767 | G | A | -0.99  | 0.3222 | -? | 0      | 0     | 0 | 1      |
| rs677409     | 11 | 119946763 | G | T | 0.99   | 0.3222 | +  | 0      | 0     | 0 | 1      |
| rs1396132    | 11 | 116395238 | A | T | -0.989 | 0.3225 | -? | 0      | 0     | 0 | 1      |

|              |    |           |   |   |        |        |   |        |       |   |        |
|--------------|----|-----------|---|---|--------|--------|---|--------|-------|---|--------|
| rs35610956   | 11 | 118144280 | G | A | 0.989  | 0.3225 | + | 0      | 0     | 0 | 1      |
| rs6589863    | 11 | 121098770 | C | G | 0.989  | 0.3226 | + | 0      | 0     | 0 | 1      |
| rs678275     | 11 | 121006298 | G | C | -0.989 | 0.3226 | - | 0      | 0     | 0 | 1      |
| rs10892505   | 11 | 119838718 | A | G | 0.989  | 0.3228 | + | 0      | 0     | 0 | 1      |
| rs2098453    | 11 | 116696680 | C | T | -0.989 | 0.3228 | - | 0      | 0     | 0 | 1      |
| rs4594010    | 11 | 120935558 | C | A | -0.989 | 0.3228 | - | 0      | 0     | 0 | 1      |
| rs7127199    | 11 | 120494516 | T | C | 0.988  | 0.323  | + | 0      | 0     | 0 | 1      |
| rs948105     | 11 | 117591654 | A | T | 0.988  | 0.3231 | + | 0      | 0     | 0 | 1      |
| rs11217999   | 11 | 120623637 | A | C | 0.988  | 0.3232 | + | 0      | 0     | 0 | 1      |
| rs11215908   | 11 | 116253905 | A | G | -0.988 | 0.3233 | - | 0      | 0     | 0 | 1      |
| rs1871757    | 11 | 117030581 | T | A | 0.988  | 0.3233 | + | 0      | 0     | 0 | 1      |
| rs2084892    | 11 | 119915651 | A | G | -0.987 | 0.3234 | - | 0      | 0     | 0 | 1      |
| rs1784559    | 11 | 118901614 | T | A | 0.987  | 0.3235 | + | 0      | 0     | 0 | 1      |
| rs2515800    | 11 | 117824592 | C | T | 0.987  | 0.3238 | + | 0      | 0     | 0 | 1      |
| rs11216639   | 11 | 117805473 | T | C | 0.986  | 0.3239 | + | 0      | 0     | 0 | 1      |
| rs180370     | 11 | 116592365 | T | C | 0.986  | 0.3242 | + | -43.5  | 2.09  | 1 | 0.1483 |
| rs1043314    | 11 | 118915944 | G | A | 0.986  | 0.3243 | + | 0      | 0     | 0 | 1      |
| rs4935746    | 11 | 120518653 | G | A | -0.986 | 0.3243 | - | 0      | 0     | 0 | 1      |
| rs1278081233 | 11 | 121135004 | G | T | -0.985 | 0.3244 | - | 0      | 0.233 | 1 | 0.6296 |
| rs633892     | 11 | 117112630 | C | A | 0.985  | 0.3246 | + | 0      | 0     | 0 | 1      |
| rs1007369    | 11 | 119700031 | C | A | 0.984  | 0.3249 | + | 0      | 0     | 0 | 1      |
| rs112711662  | 11 | 118882138 | T | C | 0.984  | 0.325  | + | 0      | 0     | 0 | 1      |
| rs678837     | 11 | 117109270 | G | T | -0.984 | 0.325  | - | 0      | 0     | 0 | 1      |
| rs12274094   | 11 | 120968462 | G | A | -0.984 | 0.3251 | - | 0      | 0     | 0 | 1      |
| rs7952159    | 11 | 120622379 | G | A | 0.984  | 0.3252 | + | 0      | 0     | 0 | 1      |
| rs582942     | 11 | 118515876 | T | C | -0.984 | 0.3253 | - | 0      | 0     | 0 | 1      |
| rs3916582    | 11 | 118887888 | T | C | -0.983 | 0.3256 | - | 0      | 0.352 | 1 | 0.5528 |
| rs75582258   | 11 | 117477761 | G | A | 0.982  | 0.3259 | + | 0      | 0     | 0 | 1      |
| rs1786177    | 11 | 117904029 | A | G | -0.981 | 0.3264 | - | -194.7 | 1.018 | 1 | 0.313  |
| rs7114961    | 11 | 118914388 | C | G | 0.981  | 0.3264 | + | 0      | 0     | 0 | 1      |
| rs586407     | 11 | 119994765 | A | G | 0.981  | 0.3267 | + | 0      | 0     | 0 | 1      |
| rs73559126   | 11 | 118880727 | A | T | 0.981  | 0.3267 | + | 0      | 0     | 0 | 1      |
| rs2276060    | 11 | 118919132 | A | G | 0.981  | 0.3268 | + | 0      | 0     | 0 | 1      |
| rs496391     | 11 | 116311186 | G | C | -0.98  | 0.3269 | - | 0      | 0     | 0 | 1      |
| rs57495164   | 11 | 118095148 | T | C | -0.98  | 0.327  | - | 0      | 0     | 0 | 1      |
| rs11607701   | 11 | 118169825 | G | A | 0.98   | 0.3271 | + | 0      | 0     | 0 | 1      |
| rs112337443  | 11 | 118530068 | C | T | -0.979 | 0.3274 | + | 0      | 0.321 | 1 | 0.571  |
| rs2276083    | 11 | 119145274 | G | A | 0.979  | 0.3276 | + | 0      | 0     | 0 | 1      |
| rs1939665    | 11 | 120600361 | T | C | 0.979  | 0.3278 | + | 0      | 0     | 0 | 1      |
| rs948093     | 11 | 121092641 | A | T | 0.978  | 0.3279 | + | 0      | 0     | 0 | 1      |
| rs10892001   | 11 | 116505440 | A | G | -0.978 | 0.328  | - | 0      | 0     | 0 | 1      |
| rs9787748    | 11 | 121101075 | T | G | 0.978  | 0.328  | + | 0      | 0     | 0 | 1      |
| rs1001973    | 11 | 119923643 | A | G | -0.978 | 0.3281 | - | 0      | 0     | 0 | 1      |
| rs11217676   | 11 | 119951167 | G | C | -0.978 | 0.3281 | - | 0      | 0     | 0 | 1      |
| rs1783850    | 11 | 117904561 | G | C | -0.978 | 0.3281 | - | -192.3 | 1.026 | 1 | 0.311  |
| rs521976     | 11 | 119758831 | T | C | -0.978 | 0.3281 | - | 0      | 0     | 0 | 1      |
| rs10437696   | 11 | 121140086 | C | T | -0.978 | 0.3282 | - | 0      | 0.23  | 1 | 0.6317 |
| rs11217429   | 11 | 119594057 | T | G | 0.977  | 0.3285 | + | 0      | 0     | 0 | 1      |
| rs1790475    | 11 | 119943201 | G | A | 0.977  | 0.3286 | + | 0      | 0     | 0 | 1      |
| rs7940405    | 11 | 118142666 | G | A | 0.977  | 0.3286 | + | 0      | 0     | 0 | 1      |
| rs948106     | 11 | 117591584 | C | T | 0.977  | 0.3287 | + | 0      | 0     | 0 | 1      |
| rs1263171    | 11 | 116680330 | G | A | -0.977 | 0.3288 | - | 0      | 0     | 0 | 1      |
| rs2156763    | 11 | 120624525 | G | A | 0.977  | 0.3288 | + | 0      | 0     | 0 | 1      |
| rs56230940   | 11 | 119039028 | T | C | -0.977 | 0.3288 | - | 0      | 0     | 0 | 1      |
| rs10790422   | 11 | 121136604 | T | C | -0.976 | 0.3291 | - | 0      | 0.238 | 1 | 0.6257 |
| rs2849172    | 11 | 116698332 | T | C | -0.976 | 0.3291 | - | 0      | 0     | 0 | 1      |

|             |    |           |   |   |        |        |    |        |       |   |         |
|-------------|----|-----------|---|---|--------|--------|----|--------|-------|---|---------|
| rs502789    | 11 | 119784133 | A | G | 0.976  | 0.3291 | +  | 0      | 0     | 0 | 1       |
| rs12807148  | 11 | 116471492 | C | T | 0.976  | 0.3292 | +  | 0      | 0     | 0 | 1       |
| rs572063    | 11 | 117105572 | G | T | 0.976  | 0.3293 | +  | 0      | 0     | 0 | 1       |
| rs11217374  | 11 | 119520730 | G | A | 0.975  | 0.3294 | +  | 0      | 0     | 0 | 1       |
| rs55960868  | 11 | 116391666 | A | G | -0.975 | 0.3297 | -  | 0      | 0     | 0 | 1       |
| rs77973629  | 11 | 117469122 | T | G | 0.975  | 0.3297 | +  | 0      | 0     | 0 | 1       |
| rs11218071  | 11 | 120816860 | G | A | 0.975  | 0.3298 | +  | 0      | 0     | 0 | 1       |
| rs12421541  | 11 | 119922558 | T | A | -0.974 | 0.3299 | -  | 0      | 0     | 0 | 1       |
| rs61898347  | 11 | 120195689 | A | G | -0.974 | 0.3299 | -  | 0      | 0     | 0 | 1       |
| rs61150131  | 11 | 118752178 | C | T | 0.974  | 0.33   | ++ | 0      | 0.065 | 1 | 0.7985  |
| rs7950159   | 11 | 119625735 | T | C | -0.974 | 0.33   | -  | 0      | 0     | 0 | 1       |
| rs948094    | 11 | 121092679 | T | C | 0.974  | 0.3302 | +  | 0      | 0     | 0 | 1       |
| rs11216825  | 11 | 118099617 | G | A | -0.973 | 0.3304 | -  | 0      | 0     | 0 | 1       |
| rs11216826  | 11 | 118099713 | A | T | -0.973 | 0.3304 | -  | 0      | 0     | 0 | 1       |
| rs3781823   | 11 | 121057430 | A | G | -0.973 | 0.3305 | -  | 0      | 0     | 0 | 1       |
| rs11216338  | 11 | 117131719 | A | G | -0.973 | 0.3306 | -  | 0      | 0     | 0 | 1       |
| rs570371    | 11 | 118568472 | G | A | 0.973  | 0.3306 | ++ | -133.6 | 1.284 | 1 | 0.2571  |
| rs79844114  | 11 | 120334905 | G | A | 0.973  | 0.3306 | +  | 0      | 0     | 0 | 1       |
| rs11217356  | 11 | 119496258 | T | C | -0.973 | 0.3307 | -  | 0      | 0     | 0 | 1       |
| rs471814    | 11 | 119794509 | G | A | -0.973 | 0.3307 | -  | 0      | 0     | 0 | 1       |
| rs7936752   | 11 | 118978132 | G | C | -0.973 | 0.3307 | -  | 0      | 0     | 0 | 1       |
| rs585809    | 11 | 119949979 | T | C | 0.973  | 0.3308 | +  | 0      | 0     | 0 | 1       |
| rs2032397   | 11 | 118153697 | A | G | 0.972  | 0.331  | +  | 0      | 0     | 0 | 1       |
| rs2032398   | 11 | 118153708 | C | G | 0.972  | 0.331  | +  | 0      | 0     | 0 | 1       |
| rs7104819   | 11 | 118769442 | G | A | -0.972 | 0.331  | -- | 0      | 0.336 | 1 | 0.5624  |
| rs11217440  | 11 | 119611348 | G | A | 0.972  | 0.3311 | +  | 0      | 0     | 0 | 1       |
| rs11217441  | 11 | 119611360 | A | G | 0.972  | 0.3311 | +  | 0      | 0     | 0 | 1       |
| rs12801855  | 11 | 117780744 | T | C | -0.972 | 0.3311 | -  | 0      | 0     | 0 | 1       |
| rs10790180  | 11 | 117246150 | C | T | 0.972  | 0.3312 | +  | 0      | 0     | 0 | 1       |
| rs73576552  | 11 | 120623361 | T | C | 0.972  | 0.3312 | +  | 0      | 0     | 0 | 1       |
| rs117179746 | 11 | 116545251 | A | G | -0.971 | 0.3315 | -  | 0      | 0     | 0 | 1       |
| rs1893318   | 11 | 117974541 | G | A | -0.971 | 0.3315 | -  | 0      | 0     | 0 | 1       |
| rs580287    | 11 | 117758658 | G | C | -0.971 | 0.3316 | -  | 0      | 0     | 0 | 1       |
| rs61426083  | 11 | 116439118 | A | G | -0.971 | 0.3316 | -  | 0      | 0     | 0 | 1       |
| rs948463    | 11 | 117969122 | G | A | -0.971 | 0.3316 | -  | 0      | 0     | 0 | 1       |
| rs73007850  | 11 | 120800291 | C | G | 0.971  | 0.3317 | +  | 0      | 0     | 0 | 1       |
| rs2186698   | 11 | 120657934 | C | G | 0.97   | 0.3319 | +  | 0      | 0     | 0 | 1       |
| rs75137105  | 11 | 116481066 | T | C | -0.97  | 0.3319 | -  | 0      | 0     | 0 | 1       |
| rs649870    | 11 | 118971251 | G | A | -0.97  | 0.3321 | -  | 0      | 0     | 0 | 1       |
| rs664011    | 11 | 117108318 | T | A | -0.97  | 0.3321 | -  | 0      | 0     | 0 | 1       |
| rs2105609   | 11 | 116535087 | A | G | -0.97  | 0.3322 | -  | 0      | 0     | 0 | 1       |
| rs7949670   | 11 | 117530935 | A | C | 0.97   | 0.3322 | ++ | 0      | 0.288 | 1 | 0.5917  |
| rs4935747   | 11 | 120518870 | C | G | -0.969 | 0.3323 | -  | 0      | 0     | 0 | 1       |
| rs10892503  | 11 | 119826815 | G | A | -0.969 | 0.3324 | -  | 0      | 0     | 0 | 1       |
| rs11218070  | 11 | 120816711 | C | T | 0.969  | 0.3324 | +  | 0      | 0     | 0 | 1       |
| rs11218072  | 11 | 120817046 | G | A | 0.969  | 0.3324 | +  | 0      | 0     | 0 | 1       |
| rs1268353   | 11 | 116639692 | T | C | -0.969 | 0.3324 | +  | 31.5   | 4.377 | 1 | 0.03642 |
| rs141414463 | 11 | 116598315 | T | C | 0.969  | 0.3324 | +  | 0      | 0     | 0 | 1       |
| rs10892226  | 11 | 118096618 | G | A | -0.969 | 0.3327 | -  | 0      | 0     | 0 | 1       |
| rs7943727   | 11 | 120839015 | C | T | 0.969  | 0.3327 | +  | 0      | 0     | 0 | 1       |
| rs6589777   | 11 | 119668742 | C | A | 0.968  | 0.333  | +  | 0      | 0     | 0 | 1       |
| rs1263167   | 11 | 116677723 | G | A | -0.967 | 0.3333 | -  | 0      | 0     | 0 | 1       |
| rs3132776   | 11 | 120601807 | A | G | 0.967  | 0.3333 | +  | 0      | 0     | 0 | 1       |
| rs10790358  | 11 | 119836955 | G | A | 0.967  | 0.3334 | +  | 0      | 0     | 0 | 1       |
| rs145111226 | 11 | 117570297 | T | C | 0.967  | 0.3334 | +  | 0      | 0     | 0 | 1       |
| rs147776682 | 11 | 117569803 | T | C | 0.967  | 0.3334 | +  | 0      | 0     | 0 | 1       |

|             |    |           |   |   |        |        |    |        |       |   |        |
|-------------|----|-----------|---|---|--------|--------|----|--------|-------|---|--------|
| rs149084104 | 11 | 117570660 | C | G | 0.967  | 0.3334 | +  | 0      | 0     | 0 | 1      |
| rs34721671  | 11 | 116467920 | G | C | 0.967  | 0.3335 | +  | 0      | 0     | 0 | 1      |
| rs7952619   | 11 | 120914370 | C | T | -0.967 | 0.3336 | -  | 0      | 0     | 0 | 1      |
| rs61900882  | 11 | 118130199 | T | C | -0.967 | 0.3337 | -  | 0      | 0     | 0 | 1      |
| rs615144    | 11 | 118028167 | A | C | -0.966 | 0.3338 | -  | 0      | 0     | 0 | 1      |
| rs7937208   | 11 | 119229374 | T | C | 0.966  | 0.334  | +  | 0      | 0     | 0 | 1      |
| rs76741837  | 11 | 116210400 | T | C | -0.966 | 0.3341 | -  | 0      | 0     | 0 | 1      |
| rs10892002  | 11 | 116505492 | C | G | -0.966 | 0.3342 | -  | 0      | 0     | 0 | 1      |
| rs604096    | 11 | 118475098 | G | A | -0.965 | 0.3343 | -- | -187.4 | 1.044 | 1 | 0.3069 |
| rs12791282  | 11 | 120066044 | G | C | -0.965 | 0.3344 | -  | 0      | 0     | 0 | 1      |
| rs12799241  | 11 | 119980729 | A | G | -0.965 | 0.3344 | -  | 0      | 0     | 0 | 1      |
| rs17119671  | 11 | 116325220 | T | C | -0.965 | 0.3344 | -  | 0      | 0     | 0 | 1      |
| rs552176    | 11 | 117133672 | A | G | -0.965 | 0.3344 | -  | 0      | 0     | 0 | 1      |
| rs145192391 | 11 | 120334126 | T | C | -0.965 | 0.3345 | -  | 0      | 0     | 0 | 1      |
| rs3802881   | 11 | 118890022 | T | C | 0.965  | 0.3346 | +  | 0      | 0     | 0 | 1      |
| rs1597866   | 11 | 119914915 | G | A | -0.965 | 0.3347 | -  | 0      | 0     | 0 | 1      |
| rs2084893   | 11 | 119914182 | G | C | -0.965 | 0.3347 | -  | 0      | 0     | 0 | 1      |
| rs509894    | 11 | 117199870 | T | C | 0.964  | 0.3349 | +  | 0      | 0     | 0 | 1      |
| rs11216337  | 11 | 117131664 | C | T | -0.964 | 0.3351 | -  | 0      | 0     | 0 | 1      |
| rs597345    | 11 | 120988124 | G | A | 0.964  | 0.3352 | +  | 0      | 0     | 0 | 1      |
| rs7931335   | 11 | 117036805 | C | T | 0.964  | 0.3352 | +  | 0      | 0     | 0 | 1      |
| rs115791680 | 11 | 120648746 | T | C | 0.963  | 0.3353 | +  | 0      | 0     | 0 | 1      |
| rs56275759  | 11 | 120728916 | C | T | 0.963  | 0.3354 | +  | 0      | 0     | 0 | 1      |
| rs4486664   | 11 | 118569067 | C | A | 0.963  | 0.3357 | ++ | -156.7 | 1.169 | 1 | 0.2796 |
| rs11545858  | 11 | 118889073 | T | G | 0.962  | 0.3359 | +  | 0      | 0     | 0 | 1      |
| rs618166    | 11 | 119937335 | A | T | 0.962  | 0.336  | +  | 0      | 0     | 0 | 1      |
| rs6589729   | 11 | 119166651 | A | G | -0.962 | 0.336  | -  | 0      | 0     | 0 | 1      |
| rs79540430  | 11 | 120603160 | T | A | 0.962  | 0.336  | +  | 0      | 0     | 0 | 1      |
| rs11218154  | 11 | 121006301 | A | G | 0.962  | 0.3361 | +  | 0      | 0     | 0 | 1      |
| rs523518    | 11 | 116529524 | A | G | 0.962  | 0.3362 | +  | 0      | 0     | 0 | 1      |
| rs7932692   | 11 | 119220012 | G | C | 0.962  | 0.3362 | +  | 0      | 0     | 0 | 1      |
| rs4938762   | 11 | 119927043 | T | C | -0.962 | 0.3363 | -  | 0      | 0     | 0 | 1      |
| rs488931    | 11 | 117344243 | A | G | -0.961 | 0.3366 | -  | 0      | 0     | 0 | 1      |
| rs11826646  | 11 | 117890754 | C | G | 0.961  | 0.3367 | +  | 0      | 0     | 0 | 1      |
| rs77262524  | 11 | 117123218 | G | C | 0.96   | 0.3369 | +  | 0      | 0     | 0 | 1      |
| rs34224649  | 11 | 119503576 | A | G | 0.96   | 0.337  | +  | 0      | 0     | 0 | 1      |
| rs10892618  | 11 | 120568392 | C | A | -0.96  | 0.3371 | -  | 0      | 0     | 0 | 1      |
| rs12363004  | 11 | 117342333 | C | T | -0.96  | 0.3372 | -  | 0      | 0     | 0 | 1      |
| rs1945009   | 11 | 120627141 | A | G | 0.96   | 0.3372 | +  | 0      | 0     | 0 | 1      |
| rs4938416   | 11 | 117467582 | T | C | 0.959  | 0.3374 | +  | 0      | 0     | 0 | 1      |
| rs4938417   | 11 | 117467586 | C | T | 0.959  | 0.3374 | +  | 0      | 0     | 0 | 1      |
| rs56031122  | 11 | 119773520 | G | A | -0.959 | 0.3374 | -  | 0      | 0     | 0 | 1      |
| rs61899037  | 11 | 119814550 | A | G | 0.959  | 0.3374 | +  | 0      | 0     | 0 | 1      |
| rs11217660  | 11 | 119920139 | A | G | -0.959 | 0.3376 | -  | 0      | 0     | 0 | 1      |
| rs75137878  | 11 | 119945024 | A | C | -0.959 | 0.3376 | -  | 0      | 0     | 0 | 1      |
| rs76200908  | 11 | 119774817 | A | G | -0.959 | 0.3377 | -  | 0      | 0     | 0 | 1      |
| rs78755429  | 11 | 118777978 | A | C | 0.959  | 0.3377 | ++ | 0      | 0.001 | 1 | 0.9791 |
| rs650585    | 11 | 117110740 | T | C | 0.959  | 0.3378 | +  | 0      | 0     | 0 | 1      |
| rs73024501  | 11 | 117808400 | G | C | 0.958  | 0.3381 | +  | 0      | 0     | 0 | 1      |
| rs12290911  | 11 | 117773917 | T | A | 0.957  | 0.3386 | +  | 0      | 0     | 0 | 1      |
| rs637065    | 11 | 117133025 | A | G | -0.956 | 0.3391 | -  | 0      | 0     | 0 | 1      |
| rs17119659  | 11 | 116312246 | C | G | -0.956 | 0.3392 | -  | 0      | 0     | 0 | 1      |
| rs7933728   | 11 | 117923031 | A | G | -0.956 | 0.3393 | -  | 0      | 0     | 0 | 1      |
| rs12274032  | 11 | 120940461 | A | G | -0.955 | 0.3394 | -  | 0      | 0     | 0 | 1      |
| rs2071521   | 11 | 116697848 | G | A | -0.955 | 0.3395 | -  | 0      | 0     | 0 | 1      |
| rs73564406  | 11 | 119033850 | A | G | -0.955 | 0.3395 | -  | 0      | 0     | 0 | 1      |

|             |    |           |   |   |        |        |    |        |       |   |        |
|-------------|----|-----------|---|---|--------|--------|----|--------|-------|---|--------|
| rs488222    | 11 | 119987576 | C | T | 0.955  | 0.3396 | +  | 0      | 0     | 0 | 1      |
| rs59711149  | 11 | 120774749 | C | T | -0.955 | 0.3396 | -  | 0      | 0     | 0 | 1      |
| rs10892668  | 11 | 120937637 | C | T | -0.955 | 0.3397 | -  | 0      | 0     | 0 | 1      |
| rs472611    | 11 | 119824102 | G | A | 0.955  | 0.3397 | +  | 0      | 0     | 0 | 1      |
| rs78830794  | 11 | 120972112 | C | T | 0.955  | 0.3397 | +  | 0      | 0     | 0 | 1      |
| rs1263166   | 11 | 116677371 | A | G | -0.954 | 0.3399 | -  | 0      | 0     | 0 | 1      |
| rs138488120 | 11 | 120144571 | A | C | 0.954  | 0.3399 | +  | 0      | 0     | 0 | 1      |
| rs35284897  | 11 | 117775895 | A | C | 0.954  | 0.3399 | +  | 0      | 0     | 0 | 1      |
| rs584231    | 11 | 117927676 | A | G | -0.954 | 0.34   | -  | 0      | 0     | 0 | 1      |
| rs7928123   | 11 | 120498337 | T | C | -0.954 | 0.3401 | -  | 0      | 0     | 0 | 1      |
| rs2509211   | 11 | 117137633 | C | T | -0.954 | 0.3402 | -  | 0      | 0     | 0 | 1      |
| rs477269    | 11 | 117138291 | G | T | -0.954 | 0.3402 | -  | 0      | 0     | 0 | 1      |
| rs507880    | 11 | 117137255 | G | T | -0.954 | 0.3402 | -  | 0      | 0     | 0 | 1      |
| rs524085    | 11 | 117137647 | G | A | -0.954 | 0.3402 | -  | 0      | 0     | 0 | 1      |
| rs540103    | 11 | 119782250 | G | A | 0.954  | 0.3403 | +  | 0      | 0     | 0 | 1      |
| rs12420795  | 11 | 118161885 | G | C | 0.953  | 0.3404 | +  | 0      | 0     | 0 | 1      |
| rs4938498   | 11 | 118162147 | G | C | 0.953  | 0.3404 | +  | 0      | 0     | 0 | 1      |
| rs4936353   | 11 | 116397649 | A | G | 0.953  | 0.3405 | +  | 0      | 0     | 0 | 1      |
| rs6589550   | 11 | 116367567 | C | A | 0.953  | 0.3407 | +  | 0      | 0     | 0 | 1      |
| rs2727789   | 11 | 116696887 | G | T | -0.952 | 0.3409 | -  | 0      | 0     | 0 | 1      |
| rs644324    | 11 | 119946171 | G | A | 0.952  | 0.341  | +  | 0      | 0     | 0 | 1      |
| rs7927785   | 11 | 116452142 | G | C | 0.952  | 0.341  | +  | 0      | 0     | 0 | 1      |
| rs4144287   | 11 | 121126285 | G | A | -0.952 | 0.3412 | -- | 0      | 0.252 | 1 | 0.616  |
| rs10892083  | 11 | 117042580 | C | G | 0.952  | 0.3413 | +  | 0      | 0     | 0 | 1      |
| rs4148173   | 11 | 119030812 | G | A | -0.952 | 0.3413 | -  | 0      | 0     | 0 | 1      |
| rs499713    | 11 | 117061961 | T | C | 0.952  | 0.3413 | +  | 0      | 0     | 0 | 1      |
| rs7118694   | 11 | 119676300 | A | G | 0.952  | 0.3413 | +  | 0      | 0     | 0 | 1      |
| rs75581341  | 11 | 117345415 | T | C | -0.952 | 0.3413 | -  | 0      | 0     | 0 | 1      |
| rs7935656   | 11 | 116364065 | C | T | 0.951  | 0.3415 | +  | 0      | 0     | 0 | 1      |
| rs79723893  | 11 | 117818515 | G | A | -0.951 | 0.3416 | -  | 0      | 0     | 0 | 1      |
| rs7939968   | 11 | 120531435 | A | T | -0.951 | 0.3418 | -  | 0      | 0     | 0 | 1      |
| rs180372    | 11 | 116591934 | A | G | 0.951  | 0.3419 | +  | -42.8  | 2.101 | 1 | 0.1472 |
| rs7928058   | 11 | 118171239 | T | G | 0.95   | 0.3419 | +  | 0      | 0     | 0 | 1      |
| rs535602    | 11 | 117107775 | A | G | -0.95  | 0.3422 | -  | 0      | 0     | 0 | 1      |
| rs7931384   | 11 | 116453047 | C | T | 0.949  | 0.3426 | +  | 0      | 0     | 0 | 1      |
| rs12280043  | 11 | 116450185 | T | A | 0.949  | 0.3428 | +  | 0      | 0     | 0 | 1      |
| rs584282    | 11 | 119945841 | G | T | 0.949  | 0.3428 | +  | 0      | 0     | 0 | 1      |
| rs11216730  | 11 | 117918702 | T | C | 0.948  | 0.3429 | ++ | 0      | 0     | 1 | 0.9888 |
| rs1145185   | 11 | 116514699 | A | G | 0.948  | 0.3429 | +  | 0      | 0     | 0 | 1      |
| rs56296109  | 11 | 118698170 | A | C | -0.948 | 0.3429 | -- | 0      | 0.352 | 1 | 0.5528 |
| rs58618446  | 11 | 117916692 | T | C | 0.948  | 0.3429 | ++ | 0      | 0     | 1 | 0.9888 |
| rs11217793  | 11 | 120161886 | T | C | -0.948 | 0.343  | -  | 0      | 0     | 0 | 1      |
| rs552879    | 11 | 117348907 | T | C | -0.948 | 0.343  | -  | 0      | 0     | 0 | 1      |
| rs11217124  | 11 | 118889132 | G | A | -0.948 | 0.3432 | -- | 0      | 0.225 | 1 | 0.635  |
| rs869638    | 11 | 118100411 | G | C | -0.948 | 0.3433 | -  | 0      | 0     | 0 | 1      |
| rs9651685   | 11 | 117967798 | C | T | -0.948 | 0.3433 | -  | 0      | 0     | 0 | 1      |
| rs55797357  | 11 | 119034374 | T | C | -0.947 | 0.3434 | -  | 0      | 0     | 0 | 1      |
| rs73001451  | 11 | 118614115 | C | T | 0.947  | 0.3437 | +  | -195.7 | 1.014 | 1 | 0.3139 |
| rs11217125  | 11 | 118889185 | C | T | -0.947 | 0.3438 | -- | 0      | 0.21  | 1 | 0.6469 |
| rs7949316   | 11 | 120495204 | T | C | 0.947  | 0.3438 | +  | 0      | 0     | 0 | 1      |
| rs1784124   | 11 | 116537618 | A | G | -0.946 | 0.3439 | -  | 0      | 0     | 0 | 1      |
| rs56703842  | 11 | 117364180 | T | C | -0.946 | 0.3439 | -  | 0      | 0     | 0 | 1      |
| rs7127949   | 11 | 119989590 | C | A | -0.946 | 0.3439 | -  | 0      | 0     | 0 | 1      |
| rs2852214   | 11 | 120613416 | A | G | 0.946  | 0.344  | +  | 0      | 0     | 0 | 1      |
| rs73008667  | 11 | 119727693 | T | C | -0.946 | 0.344  | -  | 0      | 0     | 0 | 1      |
| rs1787682   | 11 | 116539203 | G | C | -0.946 | 0.3441 | -  | 0      | 0     | 0 | 1      |

|             |    |           |   |   |        |        |   |        |       |   |        |
|-------------|----|-----------|---|---|--------|--------|---|--------|-------|---|--------|
| rs4938369   | 11 | 117188120 | T | C | 0.946  | 0.3442 | + | 0      | 0     | 0 | 1      |
| rs73557344  | 11 | 118810054 | C | G | 0.946  | 0.3442 | + | -114.1 | 1.401 | 1 | 0.2365 |
| rs75460330  | 11 | 118809767 | A | G | 0.946  | 0.3442 | + | -114.1 | 1.401 | 1 | 0.2365 |
| rs1263169   | 11 | 116678139 | A | T | -0.946 | 0.3444 | - | 0      | 0     | 0 | 1      |
| rs56153022  | 11 | 117587224 | G | C | 0.945  | 0.3445 | + | 0      | 0     | 0 | 1      |
| rs590648    | 11 | 119753355 | T | G | -0.945 | 0.3447 | - | 0      | 0     | 0 | 1      |
| rs56784564  | 11 | 118857809 | A | G | 0.945  | 0.3449 | + | 0      | 0     | 0 | 1      |
| rs3016242   | 11 | 120979316 | A | C | 0.944  | 0.3452 | + | 0      | 0     | 0 | 1      |
| rs595782    | 11 | 118985151 | C | T | -0.944 | 0.3452 | - | 0      | 0     | 0 | 1      |
| rs12807240  | 11 | 120064556 | G | A | -0.944 | 0.3453 | - | 0      | 0     | 0 | 1      |
| rs2542051   | 11 | 116697738 | C | A | -0.944 | 0.3453 | - | 0      | 0     | 0 | 1      |
| rs4936387   | 11 | 117435160 | T | C | -0.943 | 0.3455 | - | 0      | 0     | 0 | 1      |
| rs60501859  | 11 | 117806383 | C | T | 0.943  | 0.3455 | + | 0      | 0     | 0 | 1      |
| rs117341026 | 11 | 116555126 | A | G | -0.943 | 0.3456 | - | 0      | 0     | 0 | 1      |
| rs10750165  | 11 | 119638088 | G | A | -0.943 | 0.3457 | - | 0      | 0     | 0 | 1      |
| rs143605660 | 11 | 118707035 | A | G | 0.943  | 0.3457 | + | 0      | 0.475 | 1 | 0.4909 |
| rs12807541  | 11 | 120064501 | A | G | -0.943 | 0.3458 | - | 0      | 0     | 0 | 1      |
| rs61898760  | 11 | 120330904 | G | A | -0.943 | 0.3458 | - | 0      | 0     | 0 | 1      |
| rs4938615   | 11 | 118865319 | G | C | -0.942 | 0.346  | - | 0      | 0     | 0 | 1      |
| rs1784131   | 11 | 116539868 | C | T | -0.942 | 0.3461 | - | 0      | 0     | 0 | 1      |
| rs78048464  | 11 | 119761810 | T | G | -0.942 | 0.3461 | - | 0      | 0     | 0 | 1      |
| rs11217245  | 11 | 119219311 | G | A | 0.942  | 0.3462 | + | 0      | 0     | 0 | 1      |
| rs66879136  | 11 | 116392920 | A | C | -0.942 | 0.3464 | - | 0      | 0     | 0 | 1      |
| rs78952625  | 11 | 120155549 | T | C | -0.942 | 0.3464 | - | 0      | 0.151 | 1 | 0.6976 |
| rs180375    | 11 | 116591040 | T | C | 0.941  | 0.3466 | + | -43.9  | 2.085 | 1 | 0.1487 |
| rs2136420   | 11 | 119600316 | G | A | 0.941  | 0.3468 | + | 0      | 0     | 0 | 1      |
| rs35248712  | 11 | 119609714 | G | T | 0.94   | 0.347  | + | 0      | 0     | 0 | 1      |
| rs4938720   | 11 | 119609846 | C | T | 0.94   | 0.347  | + | 0      | 0     | 0 | 1      |
| rs78957222  | 11 | 119826890 | T | C | -0.94  | 0.347  | - | 0      | 0     | 0 | 1      |
| rs6589869   | 11 | 121142453 | G | C | -0.94  | 0.3471 | - | 0      | 0.251 | 1 | 0.6165 |
| rs10790402  | 11 | 120560994 | A | G | -0.94  | 0.3472 | - | 0      | 0     | 0 | 1      |
| rs2071522   | 11 | 116697538 | T | C | -0.94  | 0.3472 | - | 0      | 0     | 0 | 1      |
| rs7929799   | 11 | 119055362 | G | A | 0.94   | 0.3472 | + | 0      | 0     | 0 | 1      |
| rs11820504  | 11 | 116529442 | C | T | 0.94   | 0.3474 | + | 0      | 0     | 0 | 1      |
| rs61898345  | 11 | 120188964 | C | A | -0.94  | 0.3474 | - | 0      | 0     | 0 | 1      |
| rs883247    | 11 | 119217254 | C | T | 0.94   | 0.3474 | + | 0      | 0     | 0 | 1      |
| rs2014552   | 11 | 119504482 | A | G | 0.939  | 0.3475 | + | 0      | 0     | 0 | 1      |
| rs587726    | 11 | 119240825 | T | C | 0.939  | 0.3476 | + | 0      | 0     | 0 | 1      |
| rs7129284   | 11 | 117354904 | A | G | 0.939  | 0.3476 | + | 0      | 0     | 0 | 1      |
| rs12421434  | 11 | 119603867 | C | T | 0.939  | 0.3477 | + | 0      | 0     | 0 | 1      |
| rs12421466  | 11 | 119603983 | G | A | 0.939  | 0.3477 | + | 0      | 0     | 0 | 1      |
| rs1837509   | 11 | 116225440 | A | G | -0.939 | 0.3477 | - | 0      | 0.101 | 1 | 0.7501 |
| rs4938719   | 11 | 119603559 | G | A | 0.939  | 0.3477 | + | 0      | 0     | 0 | 1      |
| rs2509210   | 11 | 117136070 | T | C | -0.939 | 0.3478 | - | 0      | 0     | 0 | 1      |
| rs4936390   | 11 | 117498314 | A | G | 0.939  | 0.3478 | + | 0      | 0     | 0 | 1      |
| rs4936392   | 11 | 117498656 | T | G | 0.939  | 0.3478 | + | 0      | 0     | 0 | 1      |
| rs672177    | 11 | 117136378 | G | C | -0.939 | 0.3478 | - | 0      | 0     | 0 | 1      |
| rs7111678   | 11 | 117135806 | T | C | -0.939 | 0.3478 | - | 0      | 0     | 0 | 1      |
| rs78696556  | 11 | 117499830 | C | T | 0.939  | 0.3478 | + | 0      | 0     | 0 | 1      |
| rs10750177  | 11 | 120727836 | T | A | -0.939 | 0.3479 | - | 0      | 0     | 0 | 1      |
| rs7952478   | 11 | 120495486 | T | C | 0.939  | 0.3479 | + | 0      | 0     | 0 | 1      |
| rs111447379 | 11 | 117116312 | T | C | 0.938  | 0.348  | + | 0      | 0     | 0 | 1      |
| rs4938418   | 11 | 117472019 | C | T | 0.938  | 0.3481 | + | 0      | 0     | 0 | 1      |
| rs581063    | 11 | 118767077 | C | T | -0.938 | 0.3481 | - | 0      | 0.221 | 1 | 0.6384 |
| rs78136547  | 11 | 117470412 | G | C | 0.938  | 0.3481 | + | 0      | 0     | 0 | 1      |
| rs78853831  | 11 | 117411223 | T | C | 0.938  | 0.3481 | + | 0      | 0     | 0 | 1      |

|              |    |           |   |   |        |        |    |        |       |   |        |
|--------------|----|-----------|---|---|--------|--------|----|--------|-------|---|--------|
| rs12787658   | 11 | 120179563 | G | A | -0.938 | 0.3483 | -? | 0      | 0     | 0 | 1      |
| rs11217818   | 11 | 120196897 | C | T | 0.937  | 0.3486 | ++ | -151.5 | 1.193 | 1 | 0.2748 |
| rs4245206    | 11 | 119609264 | A | T | 0.937  | 0.3486 | +  | 0      | 0     | 0 | 1      |
| rs8258       | 11 | 117283676 | T | C | 0.937  | 0.3486 | +  | 0      | 0     | 0 | 1      |
| rs10892446   | 11 | 119611734 | A | G | 0.937  | 0.3487 | +  | 0      | 0     | 0 | 1      |
| rs11216555   | 11 | 117684613 | A | G | 0.937  | 0.3488 | +  | 0      | 0     | 0 | 1      |
| rs2186627    | 11 | 117774146 | G | C | 0.937  | 0.349  | +  | 0      | 0     | 0 | 1      |
| rs45573242   | 11 | 118853995 | C | A | 0.937  | 0.349  | +  | 0      | 0     | 0 | 1      |
| rs7128000    | 11 | 119989380 | A | G | -0.937 | 0.349  | -? | 0      | 0     | 0 | 1      |
| rs7128133    | 11 | 119989497 | A | G | -0.937 | 0.349  | -? | 0      | 0     | 0 | 1      |
| rs560355     | 11 | 117256384 | C | G | 0.936  | 0.3492 | +  | 0      | 0     | 0 | 1      |
| rs601122     | 11 | 117757345 | T | G | -0.936 | 0.3493 | -? | 0      | 0     | 0 | 1      |
| rs675539     | 11 | 117929001 | C | G | -0.936 | 0.3493 | -? | 0      | 0     | 0 | 1      |
| rs472785     | 11 | 117134766 | C | T | -0.935 | 0.3496 | -? | 0      | 0     | 0 | 1      |
| rs540922     | 11 | 117134761 | G | A | -0.935 | 0.3496 | -? | 0      | 0     | 0 | 1      |
| rs60657140   | 11 | 119505336 | T | G | 0.935  | 0.3499 | +  | 0      | 0     | 0 | 1      |
| rs664845     | 11 | 119923652 | A | G | -0.935 | 0.3499 | -? | 0      | 0     | 0 | 1      |
| rs3889525    | 11 | 118856537 | C | G | 0.934  | 0.3501 | +  | 0      | 0     | 0 | 1      |
| rs12362636   | 11 | 117341466 | C | T | -0.934 | 0.3502 | -? | 0      | 0     | 0 | 1      |
| rs77398170   | 11 | 118792278 | G | A | -0.934 | 0.3502 | -- | 0      | 0.013 | 1 | 0.9089 |
| rs7951668    | 11 | 119383037 | T | C | -0.934 | 0.3502 | -? | 0      | 0     | 0 | 1      |
| rs11217246   | 11 | 119219360 | C | A | 0.934  | 0.3503 | +  | 0      | 0     | 0 | 1      |
| rs12291317   | 11 | 119794853 | C | T | -0.934 | 0.3505 | -? | 0      | 0     | 0 | 1      |
| rs34599893   | 11 | 120505562 | C | T | 0.933  | 0.3506 | +  | 0      | 0     | 0 | 1      |
| rs11217434   | 11 | 119602067 | C | T | 0.933  | 0.3508 | +  | 0      | 0     | 0 | 1      |
| rs1315236635 | 11 | 117357085 | G | T | -0.933 | 0.3508 | -? | 0      | 0     | 0 | 1      |
| rs2368936    | 11 | 119601779 | C | T | 0.933  | 0.3508 | +  | 0      | 0     | 0 | 1      |
| rs4938718    | 11 | 119601497 | G | C | 0.933  | 0.3508 | +  | 0      | 0     | 0 | 1      |
| rs72645469   | 11 | 119828651 | A | C | -0.933 | 0.3508 | -? | 0      | 0     | 0 | 1      |
| rs1939219    | 11 | 117686660 | C | T | 0.933  | 0.3509 | ++ | 0      | 0.112 | 1 | 0.7379 |
| rs4415772    | 11 | 121151102 | G | T | -0.933 | 0.351  | -- | 0      | 0.642 | 1 | 0.4228 |
| rs77084900   | 11 | 117906061 | C | T | 0.933  | 0.351  | ++ | 0      | 0.001 | 1 | 0.9816 |
| rs2849176    | 11 | 116696921 | T | C | -0.932 | 0.3511 | -? | 0      | 0     | 0 | 1      |
| rs61904854   | 11 | 116467100 | T | G | 0.932  | 0.3511 | +  | 0      | 0     | 0 | 1      |
| rs79679004   | 11 | 116265581 | C | T | -0.932 | 0.3511 | -? | 0      | 0     | 0 | 1      |
| rs12417736   | 11 | 119220946 | T | C | 0.932  | 0.3512 | +  | 0      | 0     | 0 | 1      |
| rs4935749    | 11 | 120518929 | A | G | -0.932 | 0.3514 | -? | 0      | 0     | 0 | 1      |
| rs657685     | 11 | 118912982 | C | G | 0.932  | 0.3514 | +  | 0      | 0     | 0 | 1      |
| rs588534     | 11 | 117068504 | A | G | 0.931  | 0.3518 | +  | 0      | 0     | 0 | 1      |
| rs10892663   | 11 | 120911203 | C | T | -0.931 | 0.352  | -? | 0      | 0     | 0 | 1      |
| rs11216726   | 11 | 117912267 | T | C | 0.931  | 0.352  | ++ | 0      | 0.001 | 1 | 0.9808 |
| rs20337      | 11 | 119502870 | A | G | 0.931  | 0.352  | +  | 0      | 0     | 0 | 1      |
| rs7480948    | 11 | 119220483 | G | C | 0.931  | 0.352  | +  | 0      | 0     | 0 | 1      |
| rs666640     | 11 | 119923259 | T | A | -0.931 | 0.3521 | -? | 0      | 0     | 0 | 1      |
| rs116958147  | 11 | 121159481 | C | T | -0.93  | 0.3522 | -? | 0      | 0     | 0 | 1      |
| rs1783846    | 11 | 117928962 | A | C | -0.93  | 0.3522 | -? | 0      | 0     | 0 | 1      |
| rs144891162  | 11 | 117821885 | T | C | -0.93  | 0.3524 | -? | 0      | 0     | 0 | 1      |
| rs7102851    | 11 | 116269470 | C | T | -0.93  | 0.3524 | -? | 0      | 0     | 0 | 1      |
| rs11216518   | 11 | 117595599 | T | G | -0.93  | 0.3525 | -? | 0      | 0     | 0 | 1      |
| rs1007530    | 11 | 119948049 | A | G | -0.929 | 0.3527 | -? | 0      | 0     | 0 | 1      |
| rs948095     | 11 | 121092828 | A | G | 0.929  | 0.3527 | +  | 0      | 0     | 0 | 1      |
| rs12421941   | 11 | 120194357 | G | A | -0.929 | 0.3528 | -? | 0      | 0     | 0 | 1      |
| rs4472950    | 11 | 120807892 | T | C | -0.929 | 0.3529 | -? | 0      | 0     | 0 | 1      |
| rs7083       | 11 | 117156552 | T | C | -0.929 | 0.3529 | -? | 0      | 0     | 0 | 1      |
| rs73024430   | 11 | 117804535 | T | C | 0.929  | 0.353  | +  | 0      | 0     | 0 | 1      |
| rs10790290   | 11 | 119218542 | T | C | 0.929  | 0.3531 | +  | 0      | 0     | 0 | 1      |

|             |    |           |   |   |        |        |    |      |       |   |        |
|-------------|----|-----------|---|---|--------|--------|----|------|-------|---|--------|
| rs10892352  | 11 | 119218553 | T | C | 0.929  | 0.3531 | +? | 0    | 0     | 0 | 1      |
| rs12575199  | 11 | 120192509 | A | G | -0.929 | 0.3531 | -? | 0    | 0     | 0 | 1      |
| rs7938191   | 11 | 117806283 | A | G | 0.928  | 0.3532 | +? | 0    | 0     | 0 | 1      |
| rs2509050   | 11 | 118977911 | G | A | -0.928 | 0.3533 | -? | 0    | 0     | 0 | 1      |
| rs4393358   | 11 | 118569097 | T | C | 0.928  | 0.3533 | ++ | -152 | 1.19  | 1 | 0.2753 |
| rs112998705 | 11 | 118890397 | G | T | 0.928  | 0.3534 | +? | 0    | 0     | 0 | 1      |
| rs2542050   | 11 | 116697117 | C | A | -0.928 | 0.3534 | -? | 0    | 0     | 0 | 1      |
| rs73010757  | 11 | 117950199 | A | G | -0.928 | 0.3534 | -- | 0    | 0.064 | 1 | 0.801  |
| rs11217437  | 11 | 119606985 | C | G | 0.928  | 0.3536 | +? | 0    | 0     | 0 | 1      |
| rs11217438  | 11 | 119607019 | C | T | 0.928  | 0.3536 | +? | 0    | 0     | 0 | 1      |
| rs7358397   | 11 | 119221078 | A | G | 0.928  | 0.3536 | +? | 0    | 0     | 0 | 1      |
| rs10466596  | 11 | 119989123 | T | G | -0.927 | 0.3537 | -? | 0    | 0     | 0 | 1      |
| rs3759001   | 11 | 118135745 | T | C | -0.927 | 0.3537 | -? | 0    | 0     | 0 | 1      |
| rs1240777   | 11 | 116536476 | C | T | -0.927 | 0.3538 | -? | 0    | 0     | 0 | 1      |
| rs35338327  | 11 | 120691871 | A | G | 0.927  | 0.3539 | +? | 0    | 0     | 0 | 1      |
| rs1876795   | 11 | 119596147 | C | G | 0.927  | 0.354  | +? | 0    | 0     | 0 | 1      |
| rs17092740  | 11 | 118117614 | G | A | -0.926 | 0.3543 | -? | 0    | 0     | 0 | 1      |
| rs12577053  | 11 | 118121421 | G | A | -0.926 | 0.3544 | -? | 0    | 0     | 0 | 1      |
| rs12577061  | 11 | 118121553 | G | C | -0.926 | 0.3544 | -? | 0    | 0     | 0 | 1      |
| rs7928348   | 11 | 119218712 | G | C | 0.926  | 0.3546 | +? | 0    | 0     | 0 | 1      |
| rs1954787   | 11 | 120663363 | T | C | 0.926  | 0.3547 | +? | 0    | 0     | 0 | 1      |
| rs474488    | 11 | 117068977 | A | G | 0.926  | 0.3547 | +? | 0    | 0     | 0 | 1      |
| rs500713    | 11 | 117320976 | C | T | -0.926 | 0.3547 | -? | 0    | 0     | 0 | 1      |
| rs11217450  | 11 | 119617639 | G | A | 0.925  | 0.3549 | ++ | 0    | 0.125 | 1 | 0.7236 |
| rs12226639  | 11 | 120963327 | A | T | -0.925 | 0.355  | -? | 0    | 0     | 0 | 1      |
| rs111804650 | 11 | 118878960 | T | C | 0.925  | 0.3552 | +? | 0    | 0     | 0 | 1      |
| rs2136421   | 11 | 119600410 | C | T | 0.925  | 0.3552 | +? | 0    | 0     | 0 | 1      |
| rs11216464  | 11 | 117456464 | T | C | 0.924  | 0.3553 | +? | 0    | 0     | 0 | 1      |
| rs12290653  | 11 | 119632975 | A | G | -0.924 | 0.3553 | -? | 0    | 0     | 0 | 1      |
| rs10790176  | 11 | 117047852 | G | T | 0.924  | 0.3554 | +? | 0    | 0     | 0 | 1      |
| rs147189138 | 11 | 121149360 | A | G | -0.924 | 0.3554 | -? | 0    | 0     | 0 | 1      |
| rs4938353   | 11 | 117046197 | G | A | 0.924  | 0.3554 | +? | 0    | 0     | 0 | 1      |
| rs473210    | 11 | 117177800 | T | C | 0.924  | 0.3555 | +? | 0    | 0     | 0 | 1      |
| rs512188    | 11 | 117126710 | A | G | -0.924 | 0.3555 | -? | 0    | 0     | 0 | 1      |
| rs10892444  | 11 | 119604854 | A | G | 0.924  | 0.3556 | +? | 0    | 0     | 0 | 1      |
| rs11217663  | 11 | 119927491 | C | T | -0.924 | 0.3556 | -? | 0    | 0     | 0 | 1      |
| rs113373988 | 11 | 119620677 | T | G | 0.924  | 0.3556 | ++ | 0    | 0.083 | 1 | 0.7728 |
| rs6589827   | 11 | 120517844 | C | T | -0.924 | 0.3556 | -? | 0    | 0     | 0 | 1      |
| rs12574203  | 11 | 119901007 | G | A | -0.923 | 0.3558 | -? | 0    | 0     | 0 | 1      |
| rs2155380   | 11 | 119080037 | G | A | 0.923  | 0.3559 | +? | 0    | 0     | 0 | 1      |
| rs630775    | 11 | 119885547 | C | A | 0.923  | 0.3559 | +? | 0    | 0     | 0 | 1      |
| rs75646928  | 11 | 120161546 | T | C | -0.923 | 0.3559 | -- | 0    | 0.141 | 1 | 0.7074 |
| rs10736484  | 11 | 116210133 | T | C | -0.923 | 0.356  | -? | 0    | 0     | 0 | 1      |
| rs1320708   | 11 | 119881259 | C | T | 0.923  | 0.356  | +? | 0    | 0     | 0 | 1      |
| rs34805238  | 11 | 121149050 | T | C | -0.923 | 0.356  | -- | 0    | 0.48  | 1 | 0.4885 |
| rs75669750  | 11 | 120130716 | C | T | -0.923 | 0.356  | -? | 0    | 0     | 0 | 1      |
| rs12269901  | 11 | 116973929 | C | G | -0.923 | 0.3561 | -? | 0    | 0     | 0 | 1      |
| rs669316    | 11 | 117931576 | T | C | -0.923 | 0.3561 | -? | 0    | 0     | 0 | 1      |
| rs670225    | 11 | 117931353 | A | G | -0.923 | 0.3561 | -? | 0    | 0     | 0 | 1      |
| rs505390    | 11 | 116316813 | A | G | -0.923 | 0.3562 | -? | 0    | 0     | 0 | 1      |
| rs75873912  | 11 | 117465314 | G | C | 0.923  | 0.3562 | +? | 0    | 0     | 0 | 1      |
| rs79944284  | 11 | 117924155 | A | G | 0.923  | 0.3562 | ++ | 0    | 0     | 1 | 0.9869 |
| rs4514426   | 11 | 120526184 | C | T | -0.922 | 0.3563 | -? | 0    | 0     | 0 | 1      |
| rs77346448  | 11 | 117473537 | C | T | 0.922  | 0.3563 | +? | 0    | 0     | 0 | 1      |
| rs2849173   | 11 | 116697321 | G | C | -0.922 | 0.3567 | -? | 0    | 0     | 0 | 1      |
| rs117041834 | 11 | 117498920 | A | T | 0.921  | 0.3568 | +? | 0    | 0     | 0 | 1      |

|             |    |           |   |   |        |        |    |   |       |   |        |
|-------------|----|-----------|---|---|--------|--------|----|---|-------|---|--------|
| rs117870205 | 11 | 117496666 | A | G | 0.921  | 0.3568 | +  | 0 | 0     | 0 | 1      |
| rs147793723 | 11 | 117496750 | C | T | 0.921  | 0.3568 | +  | 0 | 0     | 0 | 1      |
| rs584115    | 11 | 118938880 | G | A | 0.921  | 0.3568 | +  | 0 | 0     | 0 | 1      |
| rs74681797  | 11 | 117497996 | T | C | 0.921  | 0.3568 | +  | 0 | 0     | 0 | 1      |
| rs76205818  | 11 | 117499828 | A | T | 0.921  | 0.3568 | +  | 0 | 0     | 0 | 1      |
| rs7940041   | 11 | 120690039 | A | G | 0.921  | 0.3568 | +  | 0 | 0     | 0 | 1      |
| rs78221919  | 11 | 120190141 | C | T | -0.921 | 0.3569 | -  | 0 | 0     | 0 | 1      |
| rs7927959   | 11 | 119218616 | A | T | 0.921  | 0.3569 | +  | 0 | 0     | 0 | 1      |
| rs528837    | 11 | 117179176 | A | G | 0.921  | 0.357  | +  | 0 | 0     | 0 | 1      |
| rs7105874   | 11 | 120820615 | T | C | 0.921  | 0.357  | +  | 0 | 0     | 0 | 1      |
| rs35154750  | 11 | 116462431 | C | A | 0.921  | 0.3571 | +  | 0 | 0     | 0 | 1      |
| rs7130104   | 11 | 119823316 | C | T | -0.921 | 0.3571 | -  | 0 | 0     | 0 | 1      |
| rs503023    | 11 | 116270219 | A | G | -0.921 | 0.3572 | -  | 0 | 0     | 0 | 1      |
| rs567209    | 11 | 116534828 | T | C | -0.92  | 0.3574 | -  | 0 | 0     | 0 | 1      |
| rs11217122  | 11 | 118880740 | C | T | -0.92  | 0.3576 | -- | 0 | 0.011 | 1 | 0.9181 |
| rs76190886  | 11 | 117921563 | T | C | 0.92   | 0.3578 | ++ | 0 | 0.004 | 1 | 0.9517 |
| rs117028204 | 11 | 120154445 | G | C | -0.919 | 0.3579 | -- | 0 | 0.141 | 1 | 0.707  |
| rs77223730  | 11 | 120697844 | A | G | 0.919  | 0.3579 | +  | 0 | 0     | 0 | 1      |
| rs78653140  | 11 | 120697845 | T | C | 0.919  | 0.3579 | +  | 0 | 0     | 0 | 1      |
| rs11216718  | 11 | 117908922 | A | G | 0.919  | 0.358  | ++ | 0 | 0.001 | 1 | 0.9755 |
| rs11216719  | 11 | 117908985 | C | A | 0.919  | 0.358  | ++ | 0 | 0.001 | 1 | 0.9755 |
| rs11216720  | 11 | 117909101 | T | C | 0.919  | 0.358  | ++ | 0 | 0.001 | 1 | 0.9755 |
| rs11216721  | 11 | 117909531 | T | C | 0.919  | 0.358  | ++ | 0 | 0.001 | 1 | 0.9755 |
| rs11216722  | 11 | 117910244 | A | G | 0.919  | 0.358  | ++ | 0 | 0.001 | 1 | 0.9755 |
| rs11216725  | 11 | 117911450 | T | C | 0.919  | 0.358  | ++ | 0 | 0.001 | 1 | 0.9755 |
| rs12223165  | 11 | 117910017 | A | G | 0.919  | 0.358  | ++ | 0 | 0.001 | 1 | 0.9755 |
| rs12223183  | 11 | 117910116 | A | G | 0.919  | 0.358  | ++ | 0 | 0.001 | 1 | 0.9755 |
| rs12223876  | 11 | 117907713 | A | T | 0.919  | 0.358  | ++ | 0 | 0.001 | 1 | 0.9755 |
| rs513841    | 11 | 119241249 | T | A | 0.919  | 0.358  | +  | 0 | 0     | 0 | 1      |
| rs2925771   | 11 | 117118481 | T | C | 0.919  | 0.3582 | +  | 0 | 0     | 0 | 1      |
| rs11216616  | 11 | 117781192 | A | G | -0.919 | 0.3583 | -  | 0 | 0     | 0 | 1      |
| rs17119667  | 11 | 116316617 | C | T | -0.918 | 0.3586 | -  | 0 | 0     | 0 | 1      |
| rs1355191   | 11 | 119496472 | C | T | -0.918 | 0.3587 | -  | 0 | 0     | 0 | 1      |
| rs505045    | 11 | 117152540 | G | T | -0.918 | 0.3587 | -  | 0 | 0     | 0 | 1      |
| rs10892531  | 11 | 119950934 | C | T | 0.918  | 0.3588 | +  | 0 | 0     | 0 | 1      |
| rs4938452   | 11 | 117760253 | A | T | -0.918 | 0.3588 | -  | 0 | 0     | 0 | 1      |
| rs12721080  | 11 | 116699681 | A | G | -0.917 | 0.3589 | -  | 0 | 0     | 0 | 1      |
| rs12796806  | 11 | 119612572 | G | A | 0.917  | 0.3592 | +  | 0 | 0     | 0 | 1      |
| rs4310630   | 11 | 118836638 | G | A | -0.917 | 0.3594 | -  | 0 | 0     | 0 | 1      |
| rs10892423  | 11 | 119506483 | A | G | 0.916  | 0.3595 | +  | 0 | 0     | 0 | 1      |
| rs34952981  | 11 | 119620339 | T | A | -0.916 | 0.3595 | -  | 0 | 0     | 0 | 1      |
| rs4938794   | 11 | 120160262 | A | G | -0.916 | 0.3595 | -- | 0 | 0.138 | 1 | 0.7104 |
| rs77483431  | 11 | 120158933 | G | A | -0.916 | 0.3595 | -- | 0 | 0.138 | 1 | 0.7104 |
| rs11607835  | 11 | 118835258 | C | T | -0.916 | 0.3596 | -  | 0 | 0     | 0 | 1      |
| rs4525243   | 11 | 120527341 | G | A | -0.916 | 0.3596 | -  | 0 | 0     | 0 | 1      |
| rs540261    | 11 | 118947634 | T | C | 0.916  | 0.3596 | +  | 0 | 0     | 0 | 1      |
| rs2850814   | 11 | 120772254 | A | G | -0.916 | 0.3599 | -  | 0 | 0     | 0 | 1      |
| rs11218238  | 11 | 121149254 | G | A | -0.915 | 0.36   | -- | 0 | 0.541 | 1 | 0.462  |
| rs655023    | 11 | 117127620 | C | T | -0.915 | 0.36   | -  | 0 | 0     | 0 | 1      |
| rs673357    | 11 | 119940156 | G | A | 0.915  | 0.3601 | +  | 0 | 0     | 0 | 1      |
| rs3814760   | 11 | 119217556 | G | A | 0.915  | 0.3602 | +  | 0 | 0     | 0 | 1      |
| rs73024441  | 11 | 117808145 | G | A | 0.914  | 0.3605 | +  | 0 | 0     | 0 | 1      |
| rs751369    | 11 | 120610564 | G | A | 0.914  | 0.3606 | +  | 0 | 0     | 0 | 1      |
| rs1783778   | 11 | 120978982 | A | C | 0.914  | 0.3608 | +  | 0 | 0     | 0 | 1      |
| rs113137102 | 11 | 117953132 | A | C | -0.914 | 0.3609 | -  | 0 | 0     | 0 | 1      |
| rs1320679   | 11 | 119219124 | G | T | 0.914  | 0.3609 | +  | 0 | 0     | 0 | 1      |

|             |    |           |   |   |        |        |   |   |       |   |        |
|-------------|----|-----------|---|---|--------|--------|---|---|-------|---|--------|
| rs1893265   | 11 | 119218930 | C | T | 0.913  | 0.3611 | + | 0 | 0     | 0 | 1      |
| rs538478    | 11 | 118925341 | A | G | 0.913  | 0.3611 | + | 0 | 0     | 0 | 1      |
| rs114855326 | 11 | 117347592 | C | T | -0.913 | 0.3612 | - | 0 | 0     | 0 | 1      |
| rs78284541  | 11 | 119847951 | T | C | -0.913 | 0.3613 | - | 0 | 0     | 0 | 1      |
| rs1263170   | 11 | 116678413 | T | C | -0.913 | 0.3615 | - | 0 | 0     | 0 | 1      |
| rs10444336  | 11 | 119928883 | A | C | -0.912 | 0.3616 | - | 0 | 0     | 0 | 1      |
| rs1263168   | 11 | 116677999 | C | T | -0.912 | 0.3618 | - | 0 | 0     | 0 | 1      |
| rs113941645 | 11 | 118545589 | G | C | 0.912  | 0.3619 | + | 0 | 0.705 | 1 | 0.4011 |
| rs3814754   | 11 | 119217957 | C | T | 0.912  | 0.3619 | + | 0 | 0     | 0 | 1      |
| rs12282752  | 11 | 118793918 | C | T | -0.912 | 0.362  | - | 0 | 0.086 | 1 | 0.7697 |
| rs12793075  | 11 | 119608316 | G | A | 0.911  | 0.3621 | + | 0 | 0     | 0 | 1      |
| rs6589820   | 11 | 120493629 | G | A | 0.911  | 0.3623 | + | 0 | 0     | 0 | 1      |
| rs4936496   | 11 | 119601313 | G | A | 0.911  | 0.3624 | + | 0 | 0     | 0 | 1      |
| rs11216663  | 11 | 117848632 | T | G | 0.911  | 0.3625 | + | 0 | 0     | 0 | 1      |
| rs113067228 | 11 | 120697913 | C | T | 0.91   | 0.3626 | + | 0 | 0     | 0 | 1      |
| rs1893899   | 11 | 117436936 | T | G | 0.91   | 0.3626 | + | 0 | 0     | 0 | 1      |
| rs2542052   | 11 | 116699984 | A | C | -0.91  | 0.3626 | - | 0 | 0     | 0 | 1      |
| rs4938448   | 11 | 117757547 | C | A | -0.91  | 0.3626 | - | 0 | 0     | 0 | 1      |
| rs1715456   | 11 | 118123517 | A | G | -0.91  | 0.3627 | - | 0 | 0     | 0 | 1      |
| rs681311    | 11 | 120976413 | A | G | 0.91   | 0.3627 | + | 0 | 0     | 0 | 1      |
| rs4938551   | 11 | 118707249 | C | G | 0.91   | 0.3628 | + | 0 | 0.227 | 1 | 0.6337 |
| rs4938451   | 11 | 117760135 | T | C | -0.91  | 0.3629 | - | 0 | 0     | 0 | 1      |
| rs10892318  | 11 | 118848725 | A | G | -0.91  | 0.363  | - | 0 | 0     | 0 | 1      |
| rs73564493  | 11 | 119056273 | A | G | -0.91  | 0.363  | - | 0 | 0     | 0 | 1      |
| rs11217249  | 11 | 119220551 | G | A | 0.909  | 0.3631 | + | 0 | 0     | 0 | 1      |
| rs2512146   | 11 | 117867008 | A | G | 0.91   | 0.3631 | + | 0 | 0.132 | 1 | 0.7167 |
| rs10892557  | 11 | 120138723 | T | C | -0.909 | 0.3632 | - | 0 | 0     | 0 | 1      |
| rs34953153  | 11 | 119530129 | T | C | -0.909 | 0.3632 | - | 0 | 0     | 0 | 1      |
| rs74235117  | 11 | 117923742 | T | C | 0.909  | 0.3632 | + | 0 | 0.004 | 1 | 0.947  |
| rs77731159  | 11 | 118691975 | A | T | 0.909  | 0.3632 | + | 0 | 0.557 | 1 | 0.4554 |
| rs10892649  | 11 | 120813148 | T | C | 0.909  | 0.3633 | + | 0 | 0     | 0 | 1      |
| rs4938395   | 11 | 117384673 | G | A | -0.909 | 0.3633 | - | 0 | 0     | 0 | 1      |
| rs2276122   | 11 | 117965530 | G | A | 0.909  | 0.3634 | + | 0 | 0.018 | 1 | 0.8945 |
| rs12364013  | 11 | 118119575 | C | T | -0.909 | 0.3635 | - | 0 | 0     | 0 | 1      |
| rs61904853  | 11 | 116466495 | G | C | 0.909  | 0.3635 | + | 0 | 0     | 0 | 1      |
| rs11218032  | 11 | 120724322 | A | T | 0.908  | 0.3638 | + | 0 | 0     | 0 | 1      |
| rs10892133  | 11 | 117383694 | T | C | -0.908 | 0.364  | - | 0 | 0     | 0 | 1      |
| rs73006796  | 11 | 119680375 | G | T | 0.908  | 0.364  | + | 0 | 0.019 | 1 | 0.8899 |
| rs150773762 | 11 | 119478010 | G | A | 0.907  | 0.3643 | + | 0 | 0     | 0 | 1      |
| rs6589804   | 11 | 120161641 | A | G | -0.907 | 0.3643 | - | 0 | 0.12  | 1 | 0.7296 |
| rs75736698  | 11 | 119823133 | A | G | -0.907 | 0.3643 | - | 0 | 0     | 0 | 1      |
| rs10790137  | 11 | 116205687 | G | T | -0.907 | 0.3644 | - | 0 | 0     | 0 | 1      |
| rs11217364  | 11 | 119501021 | A | G | 0.907  | 0.3644 | + | 0 | 0     | 0 | 1      |
| rs11218074  | 11 | 120819045 | G | A | 0.907  | 0.3645 | + | 0 | 0     | 0 | 1      |
| rs11824600  | 11 | 120406723 | A | G | -0.907 | 0.3645 | - | 0 | 0     | 0 | 1      |
| rs4414229   | 11 | 120472569 | G | A | 0.907  | 0.3645 | + | 0 | 0     | 0 | 1      |
| rs528508    | 11 | 117123173 | C | T | 0.907  | 0.3645 | + | 0 | 0     | 0 | 1      |
| rs680511    | 11 | 121005824 | G | A | -0.907 | 0.3646 | - | 0 | 0     | 0 | 1      |
| rs1783776   | 11 | 120979047 | G | A | 0.906  | 0.3647 | + | 0 | 0     | 0 | 1      |
| rs1783777   | 11 | 120979036 | C | T | 0.906  | 0.3647 | + | 0 | 0     | 0 | 1      |
| rs7937779   | 11 | 119957107 | G | A | -0.906 | 0.3647 | - | 0 | 0     | 0 | 1      |
| rs12802011  | 11 | 119531135 | G | A | -0.906 | 0.3648 | - | 0 | 0     | 0 | 1      |
| rs1939367   | 11 | 117761400 | A | C | -0.906 | 0.3648 | - | 0 | 0     | 0 | 1      |
| rs11824351  | 11 | 120816284 | C | T | -0.906 | 0.3649 | - | 0 | 0     | 0 | 1      |
| rs639373    | 11 | 118976719 | A | G | -0.906 | 0.3649 | - | 0 | 0     | 0 | 1      |
| rs7478880   | 11 | 120261791 | T | C | -0.906 | 0.365  | - | 0 | 0     | 0 | 1      |

|             |    |           |   |   |        |        |    |        |       |   |        |
|-------------|----|-----------|---|---|--------|--------|----|--------|-------|---|--------|
| rs12797914  | 11 | 119613092 | G | A | 0.906  | 0.3651 | +  | 0      | 0     | 0 | 1      |
| rs548636    | 11 | 119759466 | C | T | -0.906 | 0.3651 | -  | 0      | 0     | 0 | 1      |
| rs7480302   | 11 | 116583017 | G | A | -0.906 | 0.3651 | -- | -62    | 1.852 | 1 | 0.1736 |
| rs73008513  | 11 | 117004112 | G | A | 0.906  | 0.3652 | +  | 0      | 0     | 0 | 1      |
| rs481903    | 11 | 118567733 | C | T | 0.905  | 0.3653 | ++ | -193.9 | 1.021 | 1 | 0.3123 |
| rs11218230  | 11 | 121134420 | G | T | -0.905 | 0.3654 | -- | 0      | 0.495 | 1 | 0.4818 |
| rs488538    | 11 | 117118038 | G | T | 0.905  | 0.3655 | +  | 0      | 0     | 0 | 1      |
| rs7932037   | 11 | 120259430 | A | T | -0.905 | 0.3655 | -  | 0      | 0     | 0 | 1      |
| rs7949956   | 11 | 117501072 | C | T | 0.905  | 0.3656 | +  | 0      | 0     | 0 | 1      |
| rs4938447   | 11 | 117757443 | C | A | -0.904 | 0.3658 | -  | 0      | 0     | 0 | 1      |
| rs61900655  | 11 | 118120802 | G | C | -0.904 | 0.3658 | -  | 0      | 0     | 0 | 1      |
| rs73024604  | 11 | 118120351 | C | T | -0.904 | 0.3658 | -  | 0      | 0     | 0 | 1      |
| rs73024606  | 11 | 118120366 | G | C | -0.904 | 0.3658 | -  | 0      | 0     | 0 | 1      |
| rs77492882  | 11 | 117475763 | T | C | 0.904  | 0.3662 | +  | 0      | 0     | 0 | 1      |
| rs79198917  | 11 | 117475976 | A | G | 0.904  | 0.3662 | +  | 0      | 0     | 0 | 1      |
| rs12794050  | 11 | 117244255 | A | C | -0.903 | 0.3663 | -  | 0      | 0     | 0 | 1      |
| rs12785979  | 11 | 116303839 | C | A | -0.903 | 0.3665 | -  | 0      | 0     | 0 | 1      |
| rs653330    | 11 | 117906882 | A | G | -0.903 | 0.3665 | -- | 0      | 0.851 | 1 | 0.3563 |
| rs12277255  | 11 | 119632722 | G | A | -0.903 | 0.3666 | -  | 0      | 0     | 0 | 1      |
| rs565312    | 11 | 117666712 | A | G | -0.903 | 0.3666 | -  | 0      | 0     | 0 | 1      |
| rs111932453 | 11 | 120696771 | T | C | 0.903  | 0.3667 | +  | 0      | 0     | 0 | 1      |
| rs11216740  | 11 | 117963766 | A | G | 0.903  | 0.3667 | ++ | 0      | 0.019 | 1 | 0.8916 |
| rs4936566   | 11 | 120815238 | A | G | 0.903  | 0.3667 | +  | 0      | 0     | 0 | 1      |
| rs75622430  | 11 | 120696085 | T | G | 0.903  | 0.3667 | +  | 0      | 0     | 0 | 1      |
| rs79304595  | 11 | 120697009 | G | C | 0.903  | 0.3667 | +  | 0      | 0     | 0 | 1      |
| rs9633950   | 11 | 120248249 | G | T | -0.903 | 0.3667 | -  | 0      | 0     | 0 | 1      |
| rs1784281   | 11 | 120978834 | C | A | 0.902  | 0.3668 | +  | 0      | 0     | 0 | 1      |
| rs11216136  | 11 | 116647120 | G | T | -0.902 | 0.3671 | -- | 0      | 0.196 | 1 | 0.6577 |
| rs4537792   | 11 | 117723059 | G | A | 0.902  | 0.3672 | +  | 0      | 0     | 0 | 1      |
| rs686245    | 11 | 117722587 | C | T | 0.902  | 0.3672 | +  | 0      | 0     | 0 | 1      |
| rs2226635   | 11 | 117687120 | T | C | 0.901  | 0.3676 | ++ | 0      | 0.085 | 1 | 0.7711 |
| rs4938454   | 11 | 117769598 | A | C | 0.901  | 0.3676 | +  | 0      | 0     | 0 | 1      |
| rs2851460   | 11 | 118716563 | A | G | 0.901  | 0.3678 | ++ | 0      | 0.298 | 1 | 0.585  |
| rs633983    | 11 | 117460028 | G | A | 0.901  | 0.3678 | +  | 0      | 0     | 0 | 1      |
| rs11827023  | 11 | 120406694 | C | T | -0.9   | 0.3681 | -  | 0      | 0     | 0 | 1      |
| rs56315433  | 11 | 118114576 | C | A | -0.9   | 0.3681 | -  | 0      | 0     | 0 | 1      |
| rs56356019  | 11 | 118114893 | A | G | -0.9   | 0.3681 | -  | 0      | 0     | 0 | 1      |
| rs12363923  | 11 | 120791799 | T | C | 0.9    | 0.3683 | +  | 0      | 0     | 0 | 1      |
| rs10790286  | 11 | 119054488 | T | C | 0.899  | 0.3684 | +  | 0      | 0     | 0 | 1      |
| rs3915715   | 11 | 119960260 | A | G | -0.899 | 0.3684 | -  | 0      | 0     | 0 | 1      |
| rs12800445  | 11 | 119595355 | A | C | 0.899  | 0.3687 | +  | 0      | 0     | 0 | 1      |
| rs7924314   | 11 | 117960809 | A | G | -0.899 | 0.3687 | -- | 0      | 0.024 | 1 | 0.878  |
| rs145533092 | 11 | 117472684 | A | G | 0.899  | 0.3688 | +  | 0      | 0     | 0 | 1      |
| rs666741    | 11 | 118911350 | C | A | 0.899  | 0.3689 | +  | 0      | 0     | 0 | 1      |
| rs75734044  | 11 | 117652288 | A | G | 0.899  | 0.3689 | ++ | 0      | 0.023 | 1 | 0.8792 |
| rs17124575  | 11 | 120808850 | G | A | 0.898  | 0.369  | +  | 0      | 0     | 0 | 1      |
| rs11216125  | 11 | 116612274 | A | G | -0.898 | 0.3691 | -+ | 0      | 0.69  | 1 | 0.4063 |
| rs11820112  | 11 | 116212436 | A | G | -0.898 | 0.3691 | -  | 0      | 0     | 0 | 1      |
| rs77314777  | 11 | 117495305 | A | G | 0.898  | 0.3691 | +  | 0      | 0     | 0 | 1      |
| rs113264811 | 11 | 116543111 | T | C | -0.898 | 0.3692 | -  | 0      | 0     | 0 | 1      |
| rs1551241   | 11 | 120084509 | C | T | 0.898  | 0.3692 | +  | 0      | 0     | 0 | 1      |
| rs1551242   | 11 | 120084221 | T | C | 0.898  | 0.3692 | +  | 0      | 0     | 0 | 1      |
| rs621858    | 11 | 117128971 | A | G | -0.898 | 0.3692 | -  | 0      | 0     | 0 | 1      |
| rs117604511 | 11 | 117382799 | C | A | -0.898 | 0.3694 | -  | 0      | 0     | 0 | 1      |
| rs79936530  | 11 | 119847788 | A | G | -0.898 | 0.3694 | -  | 0      | 0     | 0 | 1      |
| rs673738    | 11 | 117143581 | T | C | -0.896 | 0.37   | -  | 0      | 0     | 0 | 1      |

|             |    |           |   |   |        |        |    |        |       |   |        |
|-------------|----|-----------|---|---|--------|--------|----|--------|-------|---|--------|
| rs12421814  | 11 | 119220839 | G | A | 0.896  | 0.3701 | +  | 0      | 0     | 0 | 1      |
| rs7938081   | 11 | 120701623 | C | G | 0.896  | 0.3702 | +  | 0      | 0     | 0 | 1      |
| rs531855    | 11 | 117726427 | T | C | 0.896  | 0.3704 | +  | 0      | 0     | 0 | 1      |
| rs4936565   | 11 | 120802006 | A | G | 0.896  | 0.3705 | +  | 0      | 0     | 0 | 1      |
| rs55869870  | 11 | 117446931 | A | C | 0.896  | 0.3705 | +  | 0      | 0     | 0 | 1      |
| rs11600022  | 11 | 117769430 | T | C | 0.895  | 0.3706 | +  | 0      | 0     | 0 | 1      |
| rs3016354   | 11 | 116540792 | C | T | -0.895 | 0.3707 | -  | 0      | 0     | 0 | 1      |
| rs3814759   | 11 | 119217580 | C | T | 0.894  | 0.3711 | +  | 0      | 0     | 0 | 1      |
| rs79795409  | 11 | 117229833 | T | G | 0.894  | 0.3711 | +  | 0      | 0     | 0 | 1      |
| rs11216068  | 11 | 116505239 | T | C | -0.894 | 0.3713 | -  | 0      | 0     | 0 | 1      |
| rs12789727  | 11 | 117435785 | A | C | -0.894 | 0.3714 | -- | 0      | 0.236 | 1 | 0.6275 |
| rs10892139  | 11 | 117449297 | G | A | 0.894  | 0.3715 | +  | 0      | 0     | 0 | 1      |
| rs11605293  | 11 | 116437756 | T | C | -0.894 | 0.3715 | -- | 0      | 0.544 | 1 | 0.461  |
| rs117328724 | 11 | 117378697 | T | C | 0.894  | 0.3715 | +  | 0      | 0     | 0 | 1      |
| rs10892129  | 11 | 117366111 | G | C | 0.893  | 0.3716 | +  | 0      | 0     | 0 | 1      |
| rs4462362   | 11 | 121151411 | C | G | -0.893 | 0.3717 | -- | 0      | 0.474 | 1 | 0.491  |
| rs9651695   | 11 | 120562898 | A | G | -0.893 | 0.3717 | -  | 0      | 0     | 0 | 1      |
| rs76478216  | 11 | 118605352 | C | T | -0.893 | 0.3718 | +  | -124.6 | 1.336 | 1 | 0.2477 |
| rs686598    | 11 | 117423936 | C | G | -0.893 | 0.3719 | -  | 0      | 0     | 0 | 1      |
| rs2368242   | 11 | 118115526 | T | C | -0.893 | 0.372  | -  | 0      | 0     | 0 | 1      |
| rs10892709  | 11 | 121136915 | C | T | -0.893 | 0.3721 | -- | 0      | 0.561 | 1 | 0.4539 |
| rs619772    | 11 | 117138836 | T | A | -0.893 | 0.3721 | -  | 0      | 0     | 0 | 1      |
| rs12804550  | 11 | 118011860 | A | G | -0.892 | 0.3724 | -- | -184.8 | 1.054 | 1 | 0.3047 |
| rs4935757   | 11 | 120819657 | G | A | 0.892  | 0.3726 | +  | 0      | 0     | 0 | 1      |
| rs79357714  | 11 | 116902639 | G | A | 0.891  | 0.3727 | +  | 0      | 0     | 0 | 1      |
| rs12293490  | 11 | 121137332 | T | C | -0.891 | 0.3728 | -- | 0      | 0.557 | 1 | 0.4554 |
| rs17121997  | 11 | 118131049 | T | C | -0.891 | 0.3728 | -  | 0      | 0     | 0 | 1      |
| rs34138305  | 11 | 117376413 | A | G | 0.891  | 0.3728 | +  | 0      | 0     | 0 | 1      |
| rs7126179   | 11 | 117574062 | C | T | 0.891  | 0.3729 | +  | 0      | 0     | 0 | 1      |
| rs10892559  | 11 | 120156378 | T | C | -0.891 | 0.3731 | -  | 0      | 0     | 0 | 1      |
| rs2846015   | 11 | 116540439 | T | C | -0.891 | 0.3731 | -  | 0      | 0     | 0 | 1      |
| rs3017337   | 11 | 116540807 | T | C | -0.89  | 0.3732 | -  | 0      | 0     | 0 | 1      |
| rs10892711  | 11 | 121137543 | T | G | -0.89  | 0.3735 | -- | 0      | 0.554 | 1 | 0.4567 |
| rs10892713  | 11 | 121137629 | C | G | -0.89  | 0.3735 | -- | 0      | 0.554 | 1 | 0.4567 |
| rs10892714  | 11 | 121137690 | A | G | -0.89  | 0.3735 | -- | 0      | 0.554 | 1 | 0.4567 |
| rs2305829   | 11 | 117257876 | T | G | 0.89   | 0.3735 | +  | 0      | 0     | 0 | 1      |
| rs2508807   | 11 | 120613199 | C | T | 0.89   | 0.3735 | +  | 0      | 0     | 0 | 1      |
| rs7935472   | 11 | 121137754 | G | A | -0.89  | 0.3735 | -- | 0      | 0.554 | 1 | 0.4567 |
| rs493139    | 11 | 117145949 | T | C | -0.89  | 0.3736 | -  | 0      | 0     | 0 | 1      |
| rs2276319   | 11 | 120837821 | G | A | 0.89   | 0.3737 | +  | 0      | 0     | 0 | 1      |
| rs550319    | 11 | 117168564 | G | A | 0.89   | 0.3737 | +  | 0      | 0     | 0 | 1      |
| rs561775    | 11 | 118341212 | G | A | 0.89   | 0.3737 | +  | 0      | 0.791 | 1 | 0.3739 |
| rs644215    | 11 | 117145918 | T | A | -0.89  | 0.3737 | -  | 0      | 0     | 0 | 1      |
| rs4622278   | 11 | 120527541 | C | T | -0.889 | 0.374  | -  | 0      | 0     | 0 | 1      |
| rs1145188   | 11 | 116532314 | A | G | -0.889 | 0.3741 | -  | 0      | 0     | 0 | 1      |
| rs118110450 | 11 | 117319240 | C | A | -0.889 | 0.3741 | -  | 0      | 0     | 0 | 1      |
| rs677008    | 11 | 119240071 | A | G | 0.889  | 0.3741 | +  | 0      | 0     | 0 | 1      |
| rs116989966 | 11 | 120128055 | G | A | -0.889 | 0.3742 | -  | 0      | 0     | 0 | 1      |
| rs2252356   | 11 | 120418072 | A | G | -0.889 | 0.3742 | -  | 0      | 0     | 0 | 1      |
| rs4520      | 11 | 116701535 | T | C | 0.889  | 0.3742 | +  | 0      | 0     | 0 | 1      |
| rs10892710  | 11 | 121137123 | G | A | -0.888 | 0.3743 | -- | 0      | 0.55  | 1 | 0.4582 |
| rs2512145   | 11 | 117863032 | A | G | 0.888  | 0.3743 | ++ | 0      | 0.231 | 1 | 0.6306 |
| rs73007893  | 11 | 120823074 | A | G | 0.888  | 0.3743 | +  | 0      | 0     | 0 | 1      |
| rs495438    | 11 | 117144727 | A | C | -0.888 | 0.3744 | -  | 0      | 0     | 0 | 1      |
| rs573956    | 11 | 117143605 | G | A | -0.888 | 0.3744 | -  | 0      | 0     | 0 | 1      |
| rs7925044   | 11 | 117147987 | G | A | -0.888 | 0.3744 | -  | 0      | 0     | 0 | 1      |

|             |    |           |   |   |        |        |    |   |       |   |        |
|-------------|----|-----------|---|---|--------|--------|----|---|-------|---|--------|
| rs79297443  | 11 | 119684904 | T | C | 0.888  | 0.3744 | +  | 0 | 0     | 0 | 1      |
| rs10892507  | 11 | 119859948 | G | A | 0.888  | 0.3745 | +  | 0 | 0     | 0 | 1      |
| rs73007896  | 11 | 120823269 | T | C | 0.888  | 0.3745 | +  | 0 | 0     | 0 | 1      |
| rs17120765  | 11 | 117316546 | A | G | -0.887 | 0.375  | -  | 0 | 0     | 0 | 1      |
| rs57643685  | 11 | 116897124 | G | A | 0.887  | 0.3752 | +  | 0 | 0     | 0 | 1      |
| rs584356    | 11 | 117930428 | A | G | -0.886 | 0.3756 | -  | 0 | 0     | 0 | 1      |
| rs954319    | 11 | 117686194 | A | G | -0.886 | 0.3756 | -  | 0 | 0     | 0 | 1      |
| rs77031353  | 11 | 119839762 | A | C | -0.886 | 0.3757 | -  | 0 | 0     | 0 | 1      |
| rs7950796   | 11 | 120728304 | G | A | 0.886  | 0.3757 | +  | 0 | 0     | 0 | 1      |
| rs11600703  | 11 | 120249287 | T | C | -0.886 | 0.3758 | -  | 0 | 0     | 0 | 1      |
| rs12420378  | 11 | 120250699 | G | A | -0.886 | 0.3758 | -  | 0 | 0     | 0 | 1      |
| rs9633919   | 11 | 120249493 | A | G | -0.886 | 0.3758 | -  | 0 | 0     | 0 | 1      |
| rs1271170   | 11 | 117775345 | A | G | 0.885  | 0.3759 | +  | 0 | 0     | 0 | 1      |
| rs3814755   | 11 | 119217945 | G | A | 0.885  | 0.3759 | +  | 0 | 0     | 0 | 1      |
| rs579941    | 11 | 116279292 | T | C | 0.885  | 0.376  | +  | 0 | 0     | 0 | 1      |
| rs510435    | 11 | 118980039 | T | C | -0.884 | 0.3766 | -  | 0 | 0     | 0 | 1      |
| rs6589833   | 11 | 120561883 | G | C | -0.884 | 0.3766 | -  | 0 | 0     | 0 | 1      |
| rs12280328  | 11 | 121137458 | G | A | -0.884 | 0.3767 | -- | 0 | 0.55  | 1 | 0.4584 |
| rs12293637  | 11 | 121137477 | A | G | -0.884 | 0.3767 | -- | 0 | 0.55  | 1 | 0.4584 |
| rs12420651  | 11 | 121150839 | G | T | -0.884 | 0.3767 | -- | 0 | 0.581 | 1 | 0.4458 |
| rs112799932 | 11 | 118585146 | G | T | -0.884 | 0.3769 | -- | 0 | 0.017 | 1 | 0.8948 |
| rs4414232   | 11 | 120730638 | C | T | -0.884 | 0.3769 | -  | 0 | 0     | 0 | 1      |
| rs7950819   | 11 | 121137859 | A | T | -0.884 | 0.3769 | -- | 0 | 0.538 | 1 | 0.4634 |
| rs2155993   | 11 | 119858605 | T | C | -0.883 | 0.377  | -  | 0 | 0     | 0 | 1      |
| rs35266957  | 11 | 117411730 | T | C | 0.883  | 0.377  | +  | 0 | 0     | 0 | 1      |
| rs7118520   | 11 | 117568781 | G | A | 0.883  | 0.377  | +  | 0 | 0     | 0 | 1      |
| rs2851410   | 11 | 120399287 | T | C | -0.883 | 0.3773 | -  | 0 | 0     | 0 | 1      |
| rs3814758   | 11 | 119217818 | A | G | 0.883  | 0.3775 | +  | 0 | 0     | 0 | 1      |
| rs7935970   | 11 | 121138191 | G | A | -0.883 | 0.3775 | -- | 0 | 0.535 | 1 | 0.4645 |
| rs34150933  | 11 | 118911039 | T | C | 0.882  | 0.3776 | +  | 0 | 0     | 0 | 1      |
| rs5104      | 11 | 116692334 | C | T | 0.882  | 0.3777 | +  | 0 | 0     | 0 | 1      |
| rs73580632  | 11 | 116518901 | T | C | -0.882 | 0.3778 | -  | 0 | 0     | 0 | 1      |
| rs9943622   | 11 | 121129412 | T | G | -0.882 | 0.3778 | -- | 0 | 0.405 | 1 | 0.5244 |
| rs491292    | 11 | 117755082 | T | C | -0.882 | 0.3779 | -  | 0 | 0     | 0 | 1      |
| rs6589807   | 11 | 120166860 | A | G | -0.881 | 0.3781 | -  | 0 | 0     | 0 | 1      |
| rs7943989   | 11 | 117311169 | G | A | -0.881 | 0.3781 | -  | 0 | 0     | 0 | 1      |
| rs638415    | 11 | 117913024 | C | A | -0.881 | 0.3782 | -- | 0 | 0.697 | 1 | 0.4037 |
| rs117373043 | 11 | 117616156 | T | C | -0.881 | 0.3783 | -  | 0 | 0     | 0 | 1      |
| rs10892712  | 11 | 121137603 | C | T | -0.881 | 0.3784 | -- | 0 | 0.531 | 1 | 0.4663 |
| rs492151    | 11 | 117145815 | G | A | -0.881 | 0.3784 | -  | 0 | 0     | 0 | 1      |
| rs1374565   | 11 | 119669797 | G | A | 0.88   | 0.3789 | +  | 0 | 0     | 0 | 1      |
| rs7936408   | 11 | 121138302 | T | G | -0.88  | 0.3789 | -- | 0 | 0.529 | 1 | 0.4672 |
| rs7951282   | 11 | 121138260 | C | T | -0.88  | 0.3789 | -- | 0 | 0.529 | 1 | 0.4672 |
| rs7951286   | 11 | 121138262 | A | T | -0.88  | 0.3789 | -- | 0 | 0.529 | 1 | 0.4672 |
| rs7937927   | 11 | 119382758 | C | T | -0.88  | 0.379  | -  | 0 | 0     | 0 | 1      |
| rs11600311  | 11 | 119641843 | T | C | 0.88   | 0.3791 | ++ | 0 | 0.034 | 1 | 0.8542 |
| rs11603208  | 11 | 117290963 | T | G | -0.879 | 0.3792 | -  | 0 | 0     | 0 | 1      |
| rs3862647   | 11 | 119949832 | C | T | -0.879 | 0.3792 | -  | 0 | 0     | 0 | 1      |
| rs4938476   | 11 | 117947181 | C | A | -0.879 | 0.3794 | -- | 0 | 0.058 | 1 | 0.8105 |
| rs10790248  | 11 | 118125672 | G | A | -0.879 | 0.3795 | -  | 0 | 0     | 0 | 1      |
| rs10892701  | 11 | 121132812 | C | T | -0.879 | 0.3795 | -- | 0 | 0.483 | 1 | 0.4871 |
| rs117598476 | 11 | 120277110 | C | T | -0.879 | 0.3795 | -  | 0 | 0     | 0 | 1      |
| rs34070113  | 11 | 118911139 | G | T | 0.878  | 0.3799 | +  | 0 | 0     | 0 | 1      |
| rs7112758   | 11 | 118836821 | A | G | -0.878 | 0.3799 | -  | 0 | 0     | 0 | 1      |
| rs12802294  | 11 | 116466039 | T | C | 0.878  | 0.38   | +  | 0 | 0     | 0 | 1      |
| rs11218034  | 11 | 120726562 | A | G | 0.878  | 0.3801 | +  | 0 | 0     | 0 | 1      |

|             |    |           |   |   |        |        |    |       |       |   |        |
|-------------|----|-----------|---|---|--------|--------|----|-------|-------|---|--------|
| rs472648    | 11 | 117307265 | C | T | 0.878  | 0.3801 | +  | 0     | 0     | 0 | 1      |
| rs685044    | 11 | 118942928 | A | G | 0.878  | 0.3801 | +  | 0     | 0     | 0 | 1      |
| rs7118101   | 11 | 117737382 | C | T | 0.878  | 0.3801 | +  | 0     | 0     | 0 | 1      |
| rs876798    | 11 | 117737440 | C | T | 0.878  | 0.3801 | +  | 0     | 0     | 0 | 1      |
| rs11601799  | 11 | 119659912 | A | G | 0.878  | 0.3802 | ++ | 0     | 0.021 | 1 | 0.8846 |
| rs118101513 | 11 | 119324831 | A | C | 0.878  | 0.3802 | +  | 0     | 0     | 0 | 1      |
| rs72993408  | 11 | 116225035 | T | A | -0.877 | 0.3802 | -- | 0     | 0.128 | 1 | 0.7205 |
| rs2852218   | 11 | 120618334 | G | A | 0.877  | 0.3806 | +  | 0     | 0     | 0 | 1      |
| rs4075786   | 11 | 120697162 | C | T | 0.877  | 0.3806 | +  | 0     | 0     | 0 | 1      |
| rs4076169   | 11 | 120696635 | C | T | 0.877  | 0.3806 | +  | 0     | 0     | 0 | 1      |
| rs78757430  | 11 | 119505431 | T | C | 0.877  | 0.3807 | +  | 0     | 0     | 0 | 1      |
| rs58745438  | 11 | 118848315 | C | T | -0.876 | 0.3809 | -? | 0     | 0     | 0 | 1      |
| rs12291064  | 11 | 119502703 | T | C | 0.876  | 0.3811 | +  | 0     | 0     | 0 | 1      |
| rs4245197   | 11 | 119507723 | C | T | 0.876  | 0.3813 | +  | 0     | 0     | 0 | 1      |
| rs12276124  | 11 | 121138583 | C | T | -0.875 | 0.3814 | -- | 0     | 0.604 | 1 | 0.4371 |
| rs9971517   | 11 | 121148154 | C | T | -0.875 | 0.3814 | -- | 0     | 0.535 | 1 | 0.4646 |
| rs11216022  | 11 | 116458862 | T | C | -0.875 | 0.3816 | -? | 0     | 0     | 0 | 1      |
| rs72995842  | 11 | 120630028 | T | C | 0.875  | 0.3816 | +  | 0     | 0     | 0 | 1      |
| rs1145189   | 11 | 116532856 | A | G | -0.875 | 0.3817 | -? | 0     | 0     | 0 | 1      |
| rs558590    | 11 | 117139121 | G | A | -0.875 | 0.3817 | -? | 0     | 0     | 0 | 1      |
| rs11218229  | 11 | 121134392 | G | T | -0.875 | 0.3818 | -- | 0     | 0.448 | 1 | 0.5033 |
| rs676685    | 11 | 118036942 | A | G | 0.875  | 0.3818 | +  | 0     | 0     | 0 | 1      |
| rs79164518  | 11 | 120162368 | C | T | -0.875 | 0.3818 | -- | 0     | 0.121 | 1 | 0.7283 |
| rs9667343   | 11 | 120622881 | C | G | 0.875  | 0.3818 | +  | 0     | 0     | 0 | 1      |
| rs61897706  | 11 | 119679280 | A | G | -0.874 | 0.3819 | -? | 0     | 0     | 0 | 1      |
| rs2511848   | 11 | 119201699 | A | G | -0.874 | 0.3821 | -? | 0     | 0     | 0 | 1      |
| rs35112163  | 11 | 116465552 | T | G | 0.874  | 0.3821 | +  | 0     | 0     | 0 | 1      |
| rs4938492   | 11 | 118126675 | T | C | -0.874 | 0.3821 | -? | 0     | 0     | 0 | 1      |
| rs61901381  | 11 | 120580148 | C | T | 0.874  | 0.3822 | +  | 0     | 0     | 0 | 1      |
| rs565530    | 11 | 117727735 | G | T | 0.874  | 0.3823 | +  | 0     | 0     | 0 | 1      |
| rs60790095  | 11 | 117651730 | T | C | -0.874 | 0.3823 | -- | 0     | 0.241 | 1 | 0.6237 |
| rs1104542   | 11 | 118129340 | C | T | -0.873 | 0.3824 | -? | 0     | 0     | 0 | 1      |
| rs55813570  | 11 | 117772021 | A | G | -0.873 | 0.3824 | -? | 0     | 0     | 0 | 1      |
| rs602492    | 11 | 119241743 | T | G | 0.873  | 0.3827 | +  | 0     | 0     | 0 | 1      |
| rs11602240  | 11 | 116632798 | C | T | -0.873 | 0.3828 | +  | 0     | 0.612 | 1 | 0.4341 |
| rs7110791   | 11 | 116458278 | C | A | 0.872  | 0.3832 | +  | 0     | 0     | 0 | 1      |
| rs2512154   | 11 | 117889402 | A | G | 0.872  | 0.3834 | +- | 0     | 0.498 | 1 | 0.4802 |
| rs75693006  | 11 | 117651600 | A | G | 0.872  | 0.3835 | ++ | 0     | 0.019 | 1 | 0.8915 |
| rs4533044   | 11 | 121127518 | C | T | -0.871 | 0.3837 | -- | 0     | 0.433 | 1 | 0.5105 |
| rs4938507   | 11 | 118231584 | G | A | -0.871 | 0.3837 | +  | 0     | 0.485 | 1 | 0.486  |
| rs56970059  | 11 | 116448578 | T | C | 0.871  | 0.3838 | +  | 0     | 0     | 0 | 1      |
| rs667584    | 11 | 118911544 | T | C | 0.871  | 0.3838 | +  | 0     | 0     | 0 | 1      |
| rs76219905  | 11 | 120699480 | T | C | 0.871  | 0.3839 | +  | 0     | 0     | 0 | 1      |
| rs2441939   | 11 | 119733445 | T | C | -0.87  | 0.3842 | -? | 0     | 0     | 0 | 1      |
| rs12804924  | 11 | 117425383 | T | C | -0.87  | 0.3845 | -? | 0     | 0     | 0 | 1      |
| rs4936425   | 11 | 118126904 | C | T | -0.869 | 0.3846 | -? | 0     | 0     | 0 | 1      |
| rs60727471  | 11 | 119624396 | C | T | 0.869  | 0.3847 | ++ | 0     | 0.066 | 1 | 0.7968 |
| rs11216827  | 11 | 118110202 | A | T | -0.869 | 0.3849 | -? | 0     | 0     | 0 | 1      |
| rs7937438   | 11 | 120731495 | G | A | -0.869 | 0.385  | -? | 0     | 0     | 0 | 1      |
| rs10892212  | 11 | 117958179 | A | T | 0.868  | 0.3852 | +  | 0     | 0     | 0 | 1      |
| rs4938302   | 11 | 116584504 | C | T | -0.868 | 0.3853 | -- | -55.3 | 1.932 | 1 | 0.1645 |
| rs10892189  | 11 | 117758431 | T | C | -0.868 | 0.3854 | -? | 0     | 0     | 0 | 1      |
| rs10892371  | 11 | 119367674 | G | A | -0.868 | 0.3854 | -? | 0     | 0     | 0 | 1      |
| rs474749    | 11 | 117455669 | A | G | -0.868 | 0.3855 | -? | 0     | 0     | 0 | 1      |
| rs11825298  | 11 | 117642382 | T | C | -0.868 | 0.3856 | -- | -45.9 | 2.056 | 1 | 0.1516 |
| rs9667661   | 11 | 121131225 | A | G | -0.868 | 0.3856 | -- | 0     | 0.507 | 1 | 0.4766 |

|              |    |           |   |   |        |        |    |       |       |   |        |
|--------------|----|-----------|---|---|--------|--------|----|-------|-------|---|--------|
| rs4938703    | 11 | 119524950 | T | C | -0.867 | 0.3857 | -? | 0     | 0     | 0 | 1      |
| rs7128147    | 11 | 119989636 | T | C | -0.867 | 0.3858 | -? | 0     | 0     | 0 | 1      |
| rs1009364    | 11 | 119505025 | A | G | 0.867  | 0.386  | +  | 0     | 0     | 0 | 1      |
| rs12575964   | 11 | 117127159 | A | G | 0.867  | 0.3861 | +  | 0     | 0     | 0 | 1      |
| rs4938413    | 11 | 117464204 | G | C | -0.866 | 0.3864 | -- | 0     | 0.227 | 1 | 0.634  |
| rs12417431   | 11 | 118137383 | G | A | 0.866  | 0.3865 | +  | 0     | 0     | 0 | 1      |
| rs11216005   | 11 | 116429253 | C | A | -0.866 | 0.3866 | -? | 0     | 0     | 0 | 1      |
| rs4517527    | 11 | 121128562 | G | T | -0.866 | 0.3867 | -- | 0     | 0.435 | 1 | 0.5096 |
| rs1367711737 | 11 | 116542812 | T | G | -0.865 | 0.3869 | -? | 0     | 0     | 0 | 1      |
| rs1145187    | 11 | 116532066 | G | T | -0.865 | 0.387  | -? | 0     | 0     | 0 | 1      |
| rs117239953  | 11 | 116513188 | C | T | -0.865 | 0.387  | -? | 0     | 0     | 0 | 1      |
| rs12788483   | 11 | 117410852 | C | G | 0.865  | 0.387  | +  | 0     | 0     | 0 | 1      |
| rs1560403    | 11 | 121138891 | A | G | -0.865 | 0.3871 | -- | 0     | 0.505 | 1 | 0.4771 |
| rs4376915    | 11 | 121128752 | G | A | -0.865 | 0.3872 | -- | 0     | 0.433 | 1 | 0.5106 |
| rs498684     | 11 | 118316960 | A | G | 0.865  | 0.3872 | ++ | 0     | 0.01  | 1 | 0.9205 |
| rs2508454    | 11 | 117867397 | T | C | 0.864  | 0.3873 | ++ | 0     | 0.014 | 1 | 0.9048 |
| rs7131046    | 11 | 120238534 | A | G | -0.865 | 0.3873 | -? | 0     | 0     | 0 | 1      |
| rs112377532  | 11 | 118866550 | G | C | 0.864  | 0.3874 | +  | 0     | 0     | 0 | 1      |
| rs113032308  | 11 | 118866515 | A | G | 0.864  | 0.3874 | +  | 0     | 0     | 0 | 1      |
| rs71480357   | 11 | 117665267 | G | C | -0.864 | 0.3874 | -? | 0     | 0     | 0 | 1      |
| rs1560404    | 11 | 121139062 | C | T | -0.864 | 0.3875 | -- | 0     | 0.504 | 1 | 0.4779 |
| rs12419859   | 11 | 121127974 | G | C | -0.864 | 0.3876 | -- | 0     | 0.438 | 1 | 0.5079 |
| rs1652024    | 11 | 119242556 | C | A | 0.864  | 0.3876 | +  | 0     | 0     | 0 | 1      |
| rs4307734    | 11 | 121127491 | A | C | -0.864 | 0.3876 | -- | 0     | 0.438 | 1 | 0.5079 |
| rs4370953    | 11 | 121127870 | G | A | -0.864 | 0.3876 | -- | 0     | 0.438 | 1 | 0.5079 |
| rs4938303    | 11 | 116584987 | C | T | -0.864 | 0.3877 | -- | -54.7 | 1.939 | 1 | 0.1638 |
| rs12421355   | 11 | 121128034 | A | T | -0.863 | 0.388  | -- | 0     | 0.437 | 1 | 0.5087 |
| rs4938602    | 11 | 118846466 | A | G | -0.863 | 0.3881 | -? | 0     | 0     | 0 | 1      |
| rs78015      | 11 | 119757111 | T | G | -0.862 | 0.3885 | -? | 0     | 0     | 0 | 1      |
| rs12417414   | 11 | 121131965 | C | T | -0.862 | 0.3886 | -- | 0     | 0.509 | 1 | 0.4757 |
| rs1941304    | 11 | 121132279 | A | G | -0.862 | 0.3886 | -- | 0     | 0.509 | 1 | 0.4757 |
| rs1941305    | 11 | 121132211 | A | G | -0.862 | 0.3886 | -- | 0     | 0.509 | 1 | 0.4757 |
| rs4936599    | 11 | 121129931 | T | C | -0.862 | 0.3886 | -- | 0     | 0.435 | 1 | 0.5097 |
| rs9943676    | 11 | 121129552 | C | T | -0.862 | 0.3886 | -- | 0     | 0.435 | 1 | 0.5097 |
| rs116862564  | 11 | 120874281 | G | C | 0.862  | 0.3889 | +  | 0     | 0     | 0 | 1      |
| rs12577611   | 11 | 120897987 | C | T | -0.862 | 0.3889 | -? | 0     | 0     | 0 | 1      |
| rs1942479    | 11 | 116566117 | T | C | -0.861 | 0.389  | -? | 0     | 0     | 0 | 1      |
| rs138435357  | 11 | 120081510 | A | C | 0.861  | 0.3891 | +  | 0     | 0     | 0 | 1      |
| rs6589706    | 11 | 118747813 | A | G | 0.861  | 0.3892 | +  | 0     | 0     | 0 | 1      |
| rs7111010    | 11 | 119962890 | C | A | -0.861 | 0.3895 | -? | 0     | 0     | 0 | 1      |
| rs117445862  | 11 | 117500587 | C | T | 0.86   | 0.3896 | +  | 0     | 0     | 0 | 1      |
| rs12575215   | 11 | 117341209 | C | T | -0.86  | 0.3896 | -? | 0     | 0     | 0 | 1      |
| rs141182805  | 11 | 117500633 | G | T | 0.86   | 0.3896 | +  | 0     | 0     | 0 | 1      |
| rs17123366   | 11 | 119698359 | A | G | -0.86  | 0.3896 | -? | 0     | 0     | 0 | 1      |
| rs4938747    | 11 | 119867224 | A | G | 0.86   | 0.3896 | +  | 0     | 0     | 0 | 1      |
| rs10790373   | 11 | 120155564 | T | C | -0.86  | 0.3899 | -? | 0     | 0     | 0 | 1      |
| rs12284449   | 11 | 120148845 | G | A | -0.86  | 0.3899 | -? | 0     | 0     | 0 | 1      |
| rs4936512    | 11 | 120155336 | C | T | -0.86  | 0.3899 | -? | 0     | 0     | 0 | 1      |
| rs11218228   | 11 | 121134099 | G | A | -0.86  | 0.39   | -- | 0     | 0.45  | 1 | 0.5022 |
| rs74500359   | 11 | 117680478 | T | C | 0.859  | 0.3902 | +  | 0     | 0     | 0 | 1      |
| rs35633147   | 11 | 119633448 | T | C | -0.858 | 0.3908 | -? | 0     | 0     | 0 | 1      |
| rs495132     | 11 | 118335927 | A | G | 0.858  | 0.3908 | +- | 0     | 0.821 | 1 | 0.3649 |
| rs77101533   | 11 | 119924508 | G | A | -0.858 | 0.3908 | -? | 0     | 0     | 0 | 1      |
| rs10790197   | 11 | 117501603 | T | C | 0.858  | 0.3909 | +  | 0     | 0     | 0 | 1      |
| rs10892707   | 11 | 121136762 | T | C | -0.858 | 0.3909 | -- | 0     | 0.56  | 1 | 0.4541 |
| rs143427408  | 11 | 120910225 | T | C | 0.858  | 0.391  | +  | 0     | 0     | 0 | 1      |

|             |    |           |   |   |        |        |    |       |       |   |        |
|-------------|----|-----------|---|---|--------|--------|----|-------|-------|---|--------|
| rs4938309   | 11 | 116627055 | T | C | -0.857 | 0.3912 | -+ | 0     | 0.608 | 1 | 0.4355 |
| rs76034797  | 11 | 120347586 | T | C | -0.857 | 0.3912 | -? | 0     | 0     | 0 | 1      |
| rs4340086   | 11 | 117775847 | T | A | -0.857 | 0.3915 | -? | 0     | 0     | 0 | 1      |
| rs4938439   | 11 | 117639526 | C | T | -0.857 | 0.3915 | -? | 0     | 0     | 0 | 1      |
| rs12274926  | 11 | 118295117 | C | T | 0.857  | 0.3916 | ++ | 0     | 0.014 | 1 | 0.9047 |
| rs73562872  | 11 | 119002768 | T | G | -0.857 | 0.3917 | -? | 0     | 0     | 0 | 1      |
| rs73562877  | 11 | 119010392 | A | G | -0.857 | 0.3917 | -? | 0     | 0     | 0 | 1      |
| rs498314    | 11 | 117722487 | A | G | 0.856  | 0.392  | +? | 0     | 0     | 0 | 1      |
| rs79530554  | 11 | 120627270 | T | C | 0.856  | 0.392  | +? | 0     | 0     | 0 | 1      |
| rs656199    | 11 | 117954309 | A | G | -0.856 | 0.3921 | -- | 0     | 0.132 | 1 | 0.7162 |
| rs77699630  | 11 | 117578142 | C | T | 0.855  | 0.3925 | +? | 0     | 0     | 0 | 1      |
| rs638273    | 11 | 117339926 | A | G | 0.855  | 0.3926 | +? | 0     | 0     | 0 | 1      |
| rs1940804   | 11 | 119237217 | C | T | 0.855  | 0.3927 | +? | 0     | 0     | 0 | 1      |
| rs4936601   | 11 | 121133909 | T | G | -0.855 | 0.3927 | -- | 0     | 0.52  | 1 | 0.4711 |
| rs9943623   | 11 | 121129528 | A | C | -0.855 | 0.3927 | -- | 0     | 0.503 | 1 | 0.4783 |
| rs4310650   | 11 | 116998879 | T | C | 0.855  | 0.3928 | +? | 0     | 0     | 0 | 1      |
| rs4394850   | 11 | 119504257 | C | G | 0.854  | 0.3929 | +? | 0     | 0     | 0 | 1      |
| rs895652    | 11 | 119671453 | A | G | 0.854  | 0.393  | +? | 0     | 0     | 0 | 1      |
| rs12804723  | 11 | 117425313 | T | A | -0.854 | 0.3931 | -? | 0     | 0     | 0 | 1      |
| rs57259536  | 11 | 116754753 | T | A | 0.854  | 0.3931 | +? | 0     | 0     | 0 | 1      |
| rs113684204 | 11 | 119965635 | A | T | -0.854 | 0.3932 | -? | 0     | 0     | 0 | 1      |
| rs7479050   | 11 | 120154801 | C | T | -0.854 | 0.3932 | -? | 0     | 0     | 0 | 1      |
| rs9666820   | 11 | 117327648 | C | T | 0.854  | 0.3932 | +? | 0     | 0     | 0 | 1      |
| rs10790370  | 11 | 120078393 | A | G | -0.853 | 0.3936 | -? | 0     | 0     | 0 | 1      |
| rs12272258  | 11 | 117926158 | A | G | -0.853 | 0.3936 | -? | 0     | 0     | 0 | 1      |
| rs61899015  | 11 | 119764214 | C | A | -0.853 | 0.3938 | -? | 0     | 0     | 0 | 1      |
| rs11217083  | 11 | 118770321 | G | A | -0.852 | 0.3939 | -- | 0     | 0.427 | 1 | 0.5136 |
| rs1793141   | 11 | 118108003 | G | A | -0.853 | 0.3939 | -? | 0     | 0     | 0 | 1      |
| rs2508448   | 11 | 117880688 | T | G | 0.853  | 0.3939 | +- | 0     | 0.483 | 1 | 0.487  |
| rs180327    | 11 | 116623659 | C | T | -0.852 | 0.3941 | -- | 0     | 0.027 | 1 | 0.8703 |
| rs681133    | 11 | 119798934 | T | C | 0.852  | 0.3941 | +? | 0     | 0     | 0 | 1      |
| rs536256    | 11 | 118327321 | G | A | 0.852  | 0.3943 | ++ | 0     | 0.023 | 1 | 0.8792 |
| rs4938379   | 11 | 117322782 | T | C | 0.851  | 0.3947 | +? | 0     | 0     | 0 | 1      |
| rs534845    | 11 | 116311210 | A | G | -0.851 | 0.3948 | -? | 0     | 0     | 0 | 1      |
| rs76871374  | 11 | 120699050 | G | A | 0.85   | 0.3951 | +? | 0     | 0     | 0 | 1      |
| rs12791310  | 11 | 119951884 | G | A | -0.85  | 0.3952 | -? | 0     | 0     | 0 | 1      |
| rs78097928  | 11 | 119847840 | A | G | -0.85  | 0.3952 | -? | 0     | 0     | 0 | 1      |
| rs116859831 | 11 | 116513428 | C | T | -0.85  | 0.3953 | -? | 0     | 0     | 0 | 1      |
| rs1784125   | 11 | 116537962 | C | G | -0.85  | 0.3956 | -? | 0     | 0     | 0 | 1      |
| rs7948928   | 11 | 120273224 | G | C | -0.849 | 0.3957 | -? | 0     | 0     | 0 | 1      |
| rs11217234  | 11 | 119177938 | G | A | 0.849  | 0.3959 | ++ | 0     | 0.193 | 1 | 0.6607 |
| rs7946869   | 11 | 116963312 | T | C | -0.849 | 0.3959 | -? | 0     | 0     | 0 | 1      |
| rs4259862   | 11 | 117775760 | C | T | -0.849 | 0.396  | -? | 0     | 0     | 0 | 1      |
| rs45439091  | 11 | 119054208 | T | G | -0.849 | 0.396  | -? | 0     | 0     | 0 | 1      |
| rs7128327   | 11 | 119631281 | G | A | 0.849  | 0.396  | ++ | 0     | 0.06  | 1 | 0.8059 |
| rs61899012  | 11 | 119756282 | C | G | -0.848 | 0.3962 | -? | 0     | 0     | 0 | 1      |
| rs143648302 | 11 | 117397094 | T | C | 0.848  | 0.3963 | +? | 0     | 0     | 0 | 1      |
| rs518684    | 11 | 116329917 | A | C | -0.848 | 0.3963 | -? | 0     | 0     | 0 | 1      |
| rs948415    | 11 | 119217455 | C | T | 0.848  | 0.3963 | +? | 0     | 0     | 0 | 1      |
| rs1009363   | 11 | 119505032 | G | A | 0.848  | 0.3965 | +? | 0     | 0     | 0 | 1      |
| rs116727415 | 11 | 120650530 | T | A | 0.848  | 0.3965 | +? | 0     | 0     | 0 | 1      |
| rs184841209 | 11 | 118466646 | T | G | 0.848  | 0.3965 | +- | -31.8 | 2.276 | 1 | 0.1314 |
| rs4935748   | 11 | 120518871 | A | G | -0.848 | 0.3965 | -? | 0     | 0     | 0 | 1      |
| rs7941534   | 11 | 116400382 | G | A | -0.848 | 0.3965 | -? | 0     | 0     | 0 | 1      |
| rs112186392 | 11 | 119622367 | G | A | 0.848  | 0.3966 | ++ | 0     | 0.06  | 1 | 0.8064 |
| rs948772    | 11 | 117590911 | C | G | 0.847  | 0.3969 | +? | 0     | 0     | 0 | 1      |

|             |    |           |   |   |        |        |    |        |       |   |        |
|-------------|----|-----------|---|---|--------|--------|----|--------|-------|---|--------|
| rs10750111  | 11 | 117631234 | C | T | 0.847  | 0.397  | +  | 0      | 0     | 0 | 1      |
| rs10892167  | 11 | 117619027 | C | A | 0.847  | 0.397  | +  | 0      | 0     | 0 | 1      |
| rs73011741  | 11 | 117890685 | G | A | -0.847 | 0.397  | -- | 0      | 0.219 | 1 | 0.6399 |
| rs11601133  | 11 | 117424953 | G | A | -0.847 | 0.3971 | -? | 0      | 0     | 0 | 1      |
| rs1793146   | 11 | 118113045 | T | A | -0.846 | 0.3973 | -? | 0      | 0     | 0 | 1      |
| rs78764865  | 11 | 119832901 | T | C | -0.846 | 0.3973 | -? | 0      | 0     | 0 | 1      |
| rs4936399   | 11 | 117591292 | T | C | 0.846  | 0.3977 | +  | 0      | 0     | 0 | 1      |
| rs10892373  | 11 | 119368120 | T | G | -0.846 | 0.3978 | -? | 0      | 0     | 0 | 1      |
| rs490458    | 11 | 117436190 | T | C | 0.844  | 0.3986 | +  | 0      | 0     | 0 | 1      |
| rs116979369 | 11 | 117502942 | T | C | 0.844  | 0.3987 | +  | 0      | 0     | 0 | 1      |
| rs1715453   | 11 | 118125077 | T | C | -0.844 | 0.3988 | -? | 0      | 0     | 0 | 1      |
| rs1941303   | 11 | 121132347 | C | G | -0.844 | 0.3988 | -- | 0      | 0.451 | 1 | 0.5019 |
| rs73011555  | 11 | 120912139 | G | A | -0.844 | 0.3988 | -? | 0      | 0     | 0 | 1      |
| rs10892563  | 11 | 120224544 | C | T | -0.844 | 0.3989 | -? | 0      | 0     | 0 | 1      |
| rs74860176  | 11 | 117484221 | T | C | 0.843  | 0.399  | +  | 0      | 0     | 0 | 1      |
| rs74941224  | 11 | 117483626 | T | C | 0.843  | 0.399  | +  | 0      | 0     | 0 | 1      |
| rs75500945  | 11 | 117483022 | T | C | 0.843  | 0.399  | +  | 0      | 0     | 0 | 1      |
| rs114461031 | 11 | 119932617 | T | G | 0.843  | 0.3992 | +  | 0      | 0     | 0 | 1      |
| rs492471    | 11 | 118689745 | T | C | -0.843 | 0.3992 | -+ | -81.3  | 1.655 | 1 | 0.1983 |
| rs4938289   | 11 | 116458785 | T | G | -0.843 | 0.3993 | -? | 0      | 0     | 0 | 1      |
| rs2853006   | 11 | 118110977 | T | C | -0.843 | 0.3995 | -? | 0      | 0     | 0 | 1      |
| rs76517460  | 11 | 116500411 | A | G | -0.843 | 0.3995 | -? | 0      | 0     | 0 | 1      |
| rs12280323  | 11 | 121137448 | G | A | -0.842 | 0.3997 | -- | 0      | 0.528 | 1 | 0.4674 |
| rs11217679  | 11 | 119951678 | G | A | 0.842  | 0.3998 | +  | 0      | 0     | 0 | 1      |
| rs694574    | 11 | 117145053 | A | C | 0.842  | 0.3998 | +  | 0      | 0     | 0 | 1      |
| rs9971567   | 11 | 121147950 | G | A | -0.841 | 0.4002 | -- | 0      | 0.387 | 1 | 0.5336 |
| rs4938637   | 11 | 119075323 | A | G | -0.841 | 0.4003 | -? | 0      | 0     | 0 | 1      |
| rs61897958  | 11 | 119965045 | G | T | -0.841 | 0.4003 | -? | 0      | 0     | 0 | 1      |
| rs6589851   | 11 | 120835068 | T | C | 0.841  | 0.4004 | +  | 0      | 0     | 0 | 1      |
| rs7933086   | 11 | 120269308 | A | G | -0.841 | 0.4005 | -? | 0      | 0     | 0 | 1      |
| rs1056562   | 11 | 118125625 | T | C | -0.84  | 0.401  | -? | 0      | 0     | 0 | 1      |
| rs11217490  | 11 | 119645757 | A | G | 0.84   | 0.401  | ++ | 0      | 0.026 | 1 | 0.8722 |
| rs145069523 | 11 | 119844325 | G | A | -0.839 | 0.4012 | -? | 0      | 0     | 0 | 1      |
| rs1652025   | 11 | 119360083 | G | C | 0.839  | 0.4014 | +  | 0      | 0     | 0 | 1      |
| rs4604899   | 11 | 121127540 | C | T | -0.839 | 0.4014 | -- | 0      | 0.535 | 1 | 0.4645 |
| rs613808    | 11 | 116710968 | A | G | 0.839  | 0.4016 | +  | 0      | 0     | 0 | 1      |
| rs3759004   | 11 | 118136836 | T | C | 0.839  | 0.4017 | +  | 0      | 0     | 0 | 1      |
| rs75067211  | 11 | 118854372 | T | C | -0.839 | 0.4017 | -- | 0      | 0.135 | 1 | 0.7135 |
| rs17120841  | 11 | 117407435 | G | A | 0.838  | 0.4018 | +  | 0      | 0     | 0 | 1      |
| rs74735117  | 11 | 117409971 | C | T | 0.838  | 0.4018 | +  | 0      | 0     | 0 | 1      |
| rs2282537   | 11 | 120187971 | A | G | -0.838 | 0.4019 | -? | 0      | 0     | 0 | 1      |
| rs4936400   | 11 | 117592546 | A | G | 0.838  | 0.4019 | +  | 0      | 0     | 0 | 1      |
| rs1899052   | 11 | 116224964 | G | C | -0.838 | 0.402  | -? | 0      | 0     | 0 | 1      |
| rs500389    | 11 | 117100594 | G | A | 0.838  | 0.4021 | +  | 0      | 0     | 0 | 1      |
| rs79862998  | 11 | 116525319 | A | G | -0.838 | 0.4023 | -? | 0      | 0     | 0 | 1      |
| rs4935765   | 11 | 121134781 | C | T | -0.837 | 0.4025 | -- | 0      | 0.413 | 1 | 0.5206 |
| rs4936602   | 11 | 121134532 | A | G | -0.837 | 0.4025 | -- | 0      | 0.413 | 1 | 0.5206 |
| rs4938378   | 11 | 117322357 | C | T | 0.837  | 0.4025 | +  | 0      | 0     | 0 | 1      |
| rs7113731   | 11 | 118831824 | G | A | -0.837 | 0.4025 | -? | 0      | 0     | 0 | 1      |
| rs41297897  | 11 | 120838141 | A | G | -0.837 | 0.4026 | -? | 0      | 0     | 0 | 1      |
| rs11218226  | 11 | 121130758 | C | T | -0.837 | 0.4027 | -- | 0      | 0.525 | 1 | 0.4687 |
| rs59156491  | 11 | 117287082 | T | C | 0.837  | 0.4027 | +  | 0      | 0     | 0 | 1      |
| rs4936379   | 11 | 117322454 | A | C | 0.837  | 0.4028 | +  | 0      | 0     | 0 | 1      |
| rs76651078  | 11 | 118316006 | A | G | -0.836 | 0.4029 | -+ | -100.4 | 1.497 | 1 | 0.2211 |
| rs499272    | 11 | 116485496 | G | C | -0.836 | 0.403  | -? | 0      | 0     | 0 | 1      |
| rs12286677  | 11 | 117424807 | T | C | -0.836 | 0.4031 | -? | 0      | 0     | 0 | 1      |

|             |    |           |   |   |        |        |   |      |       |   |         |
|-------------|----|-----------|---|---|--------|--------|---|------|-------|---|---------|
| rs11215943  | 11 | 116331172 | T | G | 0.836  | 0.4032 | + | 0    | 0     | 0 | 1       |
| rs12799960  | 11 | 117425206 | T | C | -0.836 | 0.4032 | - | 0    | 0     | 0 | 1       |
| rs115767079 | 11 | 120128088 | T | C | -0.836 | 0.4034 | - | 0    | 0     | 0 | 1       |
| rs11217462  | 11 | 119622613 | G | A | 0.835  | 0.4035 | + | 0    | 0.057 | 1 | 0.8119  |
| rs11607829  | 11 | 119504481 | C | G | 0.835  | 0.4036 | + | 0    | 0     | 0 | 1       |
| rs10892700  | 11 | 121132675 | T | C | -0.835 | 0.4037 | - | 0    | 0.458 | 1 | 0.4987  |
| rs4936604   | 11 | 121134903 | T | C | -0.835 | 0.4038 | - | 0    | 0.409 | 1 | 0.5225  |
| rs679022    | 11 | 117125216 | C | T | 0.834  | 0.404  | + | 0    | 0     | 0 | 1       |
| rs4635088   | 11 | 118832924 | C | G | -0.834 | 0.4042 | - | 0    | 0     | 0 | 1       |
| rs9633947   | 11 | 119644360 | A | G | 0.834  | 0.4042 | + | 0    | 0.025 | 1 | 0.8747  |
| rs3781816   | 11 | 120813959 | A | G | 0.834  | 0.4043 | + | 0    | 0     | 0 | 1       |
| rs10892708  | 11 | 121136763 | G | C | -0.834 | 0.4046 | - | 0    | 0.582 | 1 | 0.4457  |
| rs11218231  | 11 | 121134434 | G | A | -0.834 | 0.4046 | - | 0    | 0.406 | 1 | 0.5242  |
| rs10892651  | 11 | 120817653 | A | G | 0.833  | 0.4048 | + | 0    | 0     | 0 | 1       |
| rs11607245  | 11 | 118843448 | T | C | -0.833 | 0.4049 | - | 0    | 0     | 0 | 1       |
| rs574223    | 11 | 116329043 | G | T | -0.833 | 0.4051 | - | 0    | 0     | 0 | 1       |
| rs581580    | 11 | 117538453 | G | A | -0.833 | 0.4051 | - | 0    | 0     | 0 | 1       |
| rs113447930 | 11 | 120696251 | C | T | 0.832  | 0.4052 | + | 0    | 0     | 0 | 1       |
| rs73003797  | 11 | 116229491 | C | T | -0.832 | 0.4052 | - | 0    | 0.139 | 1 | 0.7091  |
| rs12279572  | 11 | 117952960 | G | A | -0.832 | 0.4053 | - | 0    | 0.145 | 1 | 0.7034  |
| rs949050    | 11 | 119885204 | T | C | 0.832  | 0.4054 | + | 0    | 0     | 0 | 1       |
| rs3781981   | 11 | 117256436 | C | T | -0.832 | 0.4056 | - | 0    | 0     | 0 | 1       |
| rs4938765   | 11 | 119943485 | T | G | -0.832 | 0.4056 | - | 0    | 0     | 0 | 1       |
| rs6589731   | 11 | 119185133 | C | T | 0.832  | 0.4056 | + | 0    | 0     | 0 | 1       |
| rs12800734  | 11 | 120836754 | G | A | 0.831  | 0.4057 | + | 0    | 0     | 0 | 1       |
| rs145993550 | 11 | 119499747 | A | G | 0.831  | 0.4058 | + | 0    | 0     | 0 | 1       |
| rs1583126   | 11 | 121135578 | T | G | -0.831 | 0.4059 | - | 0    | 0.412 | 1 | 0.5211  |
| rs7113635   | 11 | 117434146 | G | A | -0.831 | 0.4059 | - | 0    | 0.187 | 1 | 0.6657  |
| rs4936603   | 11 | 121134854 | A | C | -0.831 | 0.406  | - | 0    | 0.412 | 1 | 0.521   |
| rs2508948   | 11 | 118951642 | A | T | 0.831  | 0.4061 | + | 0    | 0     | 0 | 1       |
| rs4936607   | 11 | 121135897 | G | A | -0.831 | 0.4061 | - | 0    | 0.411 | 1 | 0.5215  |
| rs57216066  | 11 | 118861849 | A | G | 0.831  | 0.4061 | + | 0    | 0     | 0 | 1       |
| rs10892702  | 11 | 121135196 | A | T | -0.83  | 0.4063 | - | 0    | 0.411 | 1 | 0.5214  |
| rs10892703  | 11 | 121135199 | A | T | -0.83  | 0.4063 | - | 0    | 0.411 | 1 | 0.5214  |
| rs10892704  | 11 | 121135240 | T | C | -0.83  | 0.4063 | - | 0    | 0.411 | 1 | 0.5214  |
| rs10892705  | 11 | 121135286 | T | A | -0.83  | 0.4063 | - | 0    | 0.411 | 1 | 0.5214  |
| rs12787592  | 11 | 116537974 | C | G | -0.83  | 0.4063 | - | 0    | 0     | 0 | 1       |
| rs1583125   | 11 | 121135479 | A | C | -0.83  | 0.4063 | - | 0    | 0.411 | 1 | 0.5214  |
| rs535327    | 11 | 118341785 | G | A | 0.831  | 0.4063 | + | 0    | 0.727 | 1 | 0.394   |
| rs7929336   | 11 | 119961624 | C | G | -0.83  | 0.4063 | - | 0    | 0     | 0 | 1       |
| rs113271112 | 11 | 118860598 | C | A | 0.83   | 0.4065 | + | 0    | 0     | 0 | 1       |
| rs117470649 | 11 | 117493342 | G | A | 0.83   | 0.4065 | + | 0    | 0     | 0 | 1       |
| rs74335840  | 11 | 117492693 | A | T | 0.83   | 0.4065 | + | 0    | 0     | 0 | 1       |
| rs78505713  | 11 | 118860457 | T | C | 0.83   | 0.4065 | + | 0    | 0     | 0 | 1       |
| rs117580094 | 11 | 117317855 | G | T | -0.83  | 0.4066 | - | 0    | 0     | 0 | 1       |
| rs4936598   | 11 | 121129841 | A | G | -0.83  | 0.4066 | - | 0    | 0.523 | 1 | 0.4695  |
| rs73020440  | 11 | 117750926 | T | C | -0.829 | 0.407  | - | 0    | 0     | 0 | 1       |
| rs7942136   | 11 | 117760895 | C | T | -0.829 | 0.4071 | - | 0    | 0     | 0 | 1       |
| rs499434    | 11 | 120086918 | T | C | 0.829  | 0.4073 | + | 0    | 0     | 0 | 1       |
| rs11603274  | 11 | 120163930 | A | G | -0.828 | 0.4075 | - | 0    | 0.09  | 1 | 0.7639  |
| rs11607289  | 11 | 120163574 | G | A | -0.828 | 0.4075 | - | 0    | 0.09  | 1 | 0.7639  |
| rs651232    | 11 | 119764295 | T | G | -0.828 | 0.4076 | - | 0    | 0     | 0 | 1       |
| rs11602393  | 11 | 118750967 | A | T | 0.828  | 0.4079 | + | 27.4 | 4.134 | 1 | 0.04204 |
| rs10892570  | 11 | 120274501 | T | G | -0.827 | 0.4081 | - | 0    | 0     | 0 | 1       |
| rs3132778   | 11 | 120611793 | C | T | -0.827 | 0.4083 | - | 0    | 0     | 0 | 1       |
| rs76619306  | 11 | 119002868 | T | C | -0.827 | 0.4083 | - | 0    | 0     | 0 | 1       |

|             |    |           |   |   |        |        |    |       |       |   |        |
|-------------|----|-----------|---|---|--------|--------|----|-------|-------|---|--------|
| rs4936605   | 11 | 121135037 | G | A | -0.827 | 0.4084 | -- | 0     | 0.415 | 1 | 0.5194 |
| rs1573559   | 11 | 118104627 | G | A | -0.827 | 0.4085 | -? | 0     | 0     | 0 | 1      |
| rs111064597 | 11 | 116566546 | C | T | -0.826 | 0.4086 | -? | 0     | 0     | 0 | 1      |
| rs111774429 | 11 | 117335160 | T | C | 0.826  | 0.4086 | +? | 0     | 0     | 0 | 1      |
| rs4936538   | 11 | 120530316 | T | C | -0.826 | 0.4086 | -? | 0     | 0     | 0 | 1      |
| rs1583127   | 11 | 121135791 | G | A | -0.826 | 0.4087 | -- | 0     | 0.414 | 1 | 0.5199 |
| rs627291    | 11 | 118061767 | G | A | 0.826  | 0.4088 | +? | 0     | 0     | 0 | 1      |
| rs74408867  | 11 | 119558815 | C | T | -0.826 | 0.4088 | -? | 0     | 0     | 0 | 1      |
| rs114513135 | 11 | 120129129 | C | A | -0.826 | 0.4089 | -? | 0     | 0     | 0 | 1      |
| rs116667143 | 11 | 120128828 | G | C | -0.826 | 0.4089 | -? | 0     | 0     | 0 | 1      |
| rs17123747  | 11 | 120128451 | T | C | -0.826 | 0.4089 | -? | 0     | 0     | 0 | 1      |
| rs536613    | 11 | 119782588 | G | A | 0.826  | 0.4089 | +? | 0     | 0     | 0 | 1      |
| rs78314944  | 11 | 120128668 | C | G | -0.826 | 0.4089 | -? | 0     | 0     | 0 | 1      |
| rs575623    | 11 | 116278812 | C | T | 0.826  | 0.409  | +? | 0     | 0     | 0 | 1      |
| rs150628867 | 11 | 119466907 | A | G | -0.825 | 0.4091 | -? | 0     | 0     | 0 | 1      |
| rs77096386  | 11 | 117129232 | G | A | -0.825 | 0.4091 | -? | 0     | 0     | 0 | 1      |
| rs45510391  | 11 | 118936410 | A | G | -0.825 | 0.4092 | -? | 0     | 0     | 0 | 1      |
| rs61897959  | 11 | 119967825 | A | G | -0.825 | 0.4092 | -? | 0     | 0     | 0 | 1      |
| rs1941411   | 11 | 120130512 | G | A | -0.825 | 0.4094 | -? | 0     | 0     | 0 | 1      |
| rs12416965  | 11 | 121130464 | C | T | -0.825 | 0.4096 | -- | 0     | 0.51  | 1 | 0.4753 |
| rs35255208  | 11 | 121130611 | G | A | -0.825 | 0.4096 | -- | 0     | 0.51  | 1 | 0.4753 |
| rs4938497   | 11 | 118160851 | A | G | 0.824  | 0.4098 | +? | 0     | 0     | 0 | 1      |
| rs1793149   | 11 | 118127347 | A | G | -0.823 | 0.4104 | -? | 0     | 0     | 0 | 1      |
| rs4148170   | 11 | 119027545 | A | G | -0.823 | 0.4105 | -? | 0     | 0     | 0 | 1      |
| rs4938805   | 11 | 120274211 | G | A | -0.823 | 0.4106 | -? | 0     | 0     | 0 | 1      |
| rs11603307  | 11 | 120164141 | A | G | -0.822 | 0.4109 | -- | 0     | 0.088 | 1 | 0.7664 |
| rs1893317   | 11 | 117960427 | A | G | -0.822 | 0.411  | -- | 0     | 0.011 | 1 | 0.9168 |
| rs503425    | 11 | 118692727 | C | T | -0.822 | 0.411  | +  | 0     | 0.851 | 1 | 0.3564 |
| rs947890    | 11 | 117874493 | A | G | 0.822  | 0.4112 | +  | 0     | 0.591 | 1 | 0.4422 |
| rs11217108  | 11 | 118841761 | T | C | -0.821 | 0.4114 | -? | 0     | 0     | 0 | 1      |
| rs11606461  | 11 | 120593745 | T | C | 0.821  | 0.4114 | +? | 0     | 0     | 0 | 1      |
| rs149395240 | 11 | 116480033 | T | C | -0.821 | 0.4116 | -? | 0     | 0     | 0 | 1      |
| rs10892564  | 11 | 120224650 | G | A | -0.821 | 0.4117 | -? | 0     | 0     | 0 | 1      |
| rs955917    | 11 | 118016039 | A | G | -0.821 | 0.4117 | -? | 0     | 0     | 0 | 1      |
| rs2000872   | 11 | 120520364 | G | A | -0.821 | 0.4118 | -? | 0     | 0     | 0 | 1      |
| rs514635    | 11 | 119313929 | A | G | 0.82   | 0.412  | ++ | -46.5 | 2.048 | 1 | 0.1524 |
| rs2852232   | 11 | 120606290 | G | A | -0.82  | 0.4122 | -? | 0     | 0     | 0 | 1      |
| rs7112522   | 11 | 120630452 | G | A | 0.82   | 0.4122 | +? | 0     | 0     | 0 | 1      |
| rs2845939   | 11 | 117727963 | T | C | 0.82   | 0.4124 | +? | 0     | 0     | 0 | 1      |
| rs615001    | 11 | 119242277 | T | C | 0.82   | 0.4124 | +? | 0     | 0     | 0 | 1      |
| rs880812    | 11 | 117454157 | C | G | 0.82   | 0.4125 | +? | 0     | 0     | 0 | 1      |
| rs906828    | 11 | 119456168 | T | C | 0.82   | 0.4125 | +? | 0     | 0     | 0 | 1      |
| rs4938271   | 11 | 116279191 | C | T | 0.819  | 0.4126 | +? | 0     | 0     | 0 | 1      |
| rs73023041  | 11 | 116741840 | A | G | 0.819  | 0.4126 | +? | 0     | 0     | 0 | 1      |
| rs12805320  | 11 | 117425540 | T | C | -0.819 | 0.4127 | -? | 0     | 0     | 0 | 1      |
| rs2298480   | 11 | 119002439 | G | A | -0.819 | 0.4127 | -? | 0     | 0     | 0 | 1      |
| rs77852530  | 11 | 116859675 | C | A | -0.819 | 0.4127 | -? | 0     | 0     | 0 | 1      |
| rs476130    | 11 | 117727883 | T | C | 0.819  | 0.4128 | +? | 0     | 0     | 0 | 1      |
| rs113184379 | 11 | 120695351 | G | C | 0.819  | 0.413  | +? | 0     | 0     | 0 | 1      |
| rs1793150   | 11 | 118127314 | G | A | -0.819 | 0.413  | -? | 0     | 0     | 0 | 1      |
| rs1793151   | 11 | 118126920 | C | T | -0.819 | 0.413  | -? | 0     | 0     | 0 | 1      |
| rs10892718  | 11 | 121156870 | A | C | -0.818 | 0.4133 | -? | 0     | 0     | 0 | 1      |
| rs2512144   | 11 | 117862298 | A | G | 0.818  | 0.4134 | ++ | 0     | 0.172 | 1 | 0.6783 |
| rs2077620   | 11 | 117687412 | T | G | -0.817 | 0.4138 | -? | 0     | 0     | 0 | 1      |
| rs4412764   | 11 | 119507925 | A | G | 0.817  | 0.4138 | +? | 0     | 0     | 0 | 1      |
| rs2512150   | 11 | 117883208 | C | G | 0.817  | 0.4139 | +  | 0     | 0.455 | 1 | 0.4998 |

|             |    |           |   |   |        |        |    |        |       |   |        |
|-------------|----|-----------|---|---|--------|--------|----|--------|-------|---|--------|
| rs12808266  | 11 | 119649903 | T | C | -0.817 | 0.4141 | -? | 0      | 0     | 0 | 1      |
| rs1787700   | 11 | 116564408 | T | C | -0.817 | 0.4141 | -? | 0      | 0     | 0 | 1      |
| rs524936    | 11 | 118341921 | A | G | 0.817  | 0.4141 | +- | 0      | 0.744 | 1 | 0.3884 |
| rs667944    | 11 | 117128271 | G | A | 0.817  | 0.4141 | +  | 0      | 0     | 0 | 1      |
| rs11603757  | 11 | 120164658 | T | G | -0.817 | 0.4142 | -- | 0      | 0.086 | 1 | 0.769  |
| rs4148171   | 11 | 119027830 | G | A | -0.816 | 0.4143 | -? | 0      | 0     | 0 | 1      |
| rs7108508   | 11 | 119026052 | A | G | -0.816 | 0.4143 | -? | 0      | 0     | 0 | 1      |
| rs78642155  | 11 | 116514092 | C | G | -0.816 | 0.4143 | -? | 0      | 0     | 0 | 1      |
| rs17245873  | 11 | 121066137 | A | T | -0.816 | 0.4144 | -? | 0      | 0     | 0 | 1      |
| rs659471    | 11 | 119822879 | G | A | 0.816  | 0.4145 | +  | 0      | 0     | 0 | 1      |
| rs12800456  | 11 | 120063441 | G | A | -0.816 | 0.4146 | -? | 0      | 0     | 0 | 1      |
| rs1942924   | 11 | 117554338 | T | G | 0.815  | 0.4148 | +  | 0      | 0     | 0 | 1      |
| rs3802870   | 11 | 117789242 | G | C | 0.815  | 0.4149 | +  | 0      | 0     | 0 | 1      |
| rs687740    | 11 | 117177603 | C | A | -0.815 | 0.4149 | -? | 0      | 0     | 0 | 1      |
| rs11217081  | 11 | 118769032 | G | A | -0.815 | 0.415  | -- | 0      | 0.292 | 1 | 0.5887 |
| rs4252261   | 11 | 117862575 | G | T | 0.815  | 0.4151 | +- | 0      | 0.233 | 1 | 0.6293 |
| rs4604900   | 11 | 121127696 | A | T | -0.815 | 0.4151 | -- | 0      | 0.486 | 1 | 0.4859 |
| rs7104543   | 11 | 120724121 | G | A | -0.815 | 0.4151 | -? | 0      | 0     | 0 | 1      |
| rs1715449   | 11 | 118128455 | G | A | -0.814 | 0.4154 | -? | 0      | 0     | 0 | 1      |
| rs1715450   | 11 | 118128445 | C | G | -0.814 | 0.4154 | -? | 0      | 0     | 0 | 1      |
| rs12292453  | 11 | 120554278 | T | C | 0.814  | 0.4158 | +  | 0      | 0     | 0 | 1      |
| rs625447    | 11 | 117661100 | C | T | 0.813  | 0.416  | +  | 0      | 0     | 0 | 1      |
| rs147710683 | 11 | 118121356 | T | C | 0.813  | 0.4163 | +- | -185.7 | 1.05  | 1 | 0.3055 |
| rs10750181  | 11 | 121136531 | T | C | -0.813 | 0.4164 | -- | 0      | 0.446 | 1 | 0.5043 |
| rs12797625  | 11 | 120897776 | A | G | -0.813 | 0.4164 | -? | 0      | 0     | 0 | 1      |
| rs3802885   | 11 | 119032689 | C | A | -0.813 | 0.4165 | -? | 0      | 0     | 0 | 1      |
| rs117619191 | 11 | 117248283 | C | T | -0.812 | 0.4167 | -? | 0      | 0     | 0 | 1      |
| rs12362596  | 11 | 118105473 | G | C | -0.812 | 0.4167 | -? | 0      | 0     | 0 | 1      |
| rs12800503  | 11 | 117426506 | T | G | -0.812 | 0.4168 | -? | 0      | 0     | 0 | 1      |
| rs7128320   | 11 | 120835246 | G | A | 0.812  | 0.4168 | +  | 0      | 0     | 0 | 1      |
| rs10892706  | 11 | 121136756 | A | T | -0.812 | 0.417  | -- | 0      | 0.537 | 1 | 0.4637 |
| rs11600065  | 11 | 117556714 | C | A | 0.812  | 0.417  | +  | 0      | 0     | 0 | 1      |
| rs151127828 | 11 | 118206121 | A | G | 0.812  | 0.4171 | ++ | 0      | 0.294 | 1 | 0.5878 |
| rs1893038   | 11 | 117617379 | C | T | 0.811  | 0.4172 | +  | 0      | 0     | 0 | 1      |
| rs2084291   | 11 | 119697231 | G | A | 0.811  | 0.4172 | +  | 0      | 0     | 0 | 1      |
| rs57210824  | 11 | 117842344 | T | A | -0.811 | 0.4173 | -- | 0      | 0.488 | 1 | 0.4846 |
| rs574603    | 11 | 117177741 | C | T | -0.811 | 0.4173 | -? | 0      | 0     | 0 | 1      |
| rs73010962  | 11 | 116221255 | G | A | -0.811 | 0.4173 | -- | 0      | 0.125 | 1 | 0.7236 |
| rs515756    | 11 | 117201165 | G | T | 0.811  | 0.4174 | +  | 0      | 0     | 0 | 1      |
| rs10892451  | 11 | 119628589 | T | G | -0.811 | 0.4175 | -? | 0      | 0     | 0 | 1      |
| rs4936347   | 11 | 116210119 | T | C | 0.811  | 0.4175 | +  | 0      | 0     | 0 | 1      |
| rs55831600  | 11 | 119817902 | A | G | 0.811  | 0.4176 | +  | 0      | 0     | 0 | 1      |
| rs35024210  | 11 | 120817865 | A | C | 0.81   | 0.4178 | +  | 0      | 0     | 0 | 1      |
| rs17311059  | 11 | 119694933 | A | T | -0.81  | 0.418  | -? | 0      | 0     | 0 | 1      |
| rs3890562   | 11 | 118837113 | G | A | -0.81  | 0.4181 | -? | 0      | 0     | 0 | 1      |
| rs11217451  | 11 | 119618503 | A | G | 0.809  | 0.4183 | ++ | 0      | 0.05  | 1 | 0.8234 |
| rs474981    | 11 | 117008881 | A | G | 0.809  | 0.4183 | +  | 0      | 0     | 0 | 1      |
| rs45507395  | 11 | 117155696 | T | G | -0.809 | 0.4185 | -? | 0      | 0     | 0 | 1      |
| rs11607141  | 11 | 117294022 | G | T | -0.809 | 0.4186 | -? | 0      | 0     | 0 | 1      |
| rs4505073   | 11 | 119613788 | G | C | 0.809  | 0.4186 | +  | 0      | 0     | 0 | 1      |
| rs117689643 | 11 | 116514329 | T | G | -0.808 | 0.4189 | -? | 0      | 0     | 0 | 1      |
| rs652455    | 11 | 117071449 | C | T | 0.808  | 0.4189 | +  | 0      | 0     | 0 | 1      |
| rs640483    | 11 | 117770505 | G | A | -0.808 | 0.419  | -? | 0      | 0     | 0 | 1      |
| rs10750180  | 11 | 121136349 | C | T | -0.808 | 0.4191 | -- | 0      | 0.362 | 1 | 0.5476 |
| rs10790418  | 11 | 121136428 | T | C | -0.808 | 0.4191 | -- | 0      | 0.362 | 1 | 0.5476 |
| rs10790420  | 11 | 121136458 | T | C | -0.808 | 0.4191 | -- | 0      | 0.362 | 1 | 0.5476 |

|             |    |           |   |   |        |        |    |       |       |   |        |
|-------------|----|-----------|---|---|--------|--------|----|-------|-------|---|--------|
| rs10790421  | 11 | 121136529 | C | T | -0.808 | 0.4191 | -- | 0     | 0.362 | 1 | 0.5476 |
| rs4936608   | 11 | 121136069 | T | C | -0.808 | 0.4191 | -- | 0     | 0.362 | 1 | 0.5476 |
| rs145811313 | 11 | 117433042 | A | C | 0.808  | 0.4193 | +? | 0     | 0     | 0 | 1      |
| rs17123976  | 11 | 120396329 | C | T | 0.807  | 0.4196 | +? | 0     | 0     | 0 | 1      |
| rs116948654 | 11 | 116514319 | C | T | -0.807 | 0.4198 | -? | 0     | 0     | 0 | 1      |
| rs73578248  | 11 | 120154200 | T | C | 0.807  | 0.4198 | +? | 0     | 0     | 0 | 1      |
| rs45445895  | 11 | 117952091 | A | G | -0.807 | 0.4199 | -? | 0     | 0     | 0 | 1      |
| rs11216396  | 11 | 117319720 | G | A | 0.806  | 0.4201 | +? | 0     | 0     | 0 | 1      |
| rs12271856  | 11 | 118791532 | T | G | -0.806 | 0.4203 | -- | 0     | 0.002 | 1 | 0.9657 |
| rs1060211   | 11 | 117039797 | G | A | 0.806  | 0.4204 | +? | 0     | 0     | 0 | 1      |
| rs6589785   | 11 | 119878605 | T | G | -0.806 | 0.4205 | -? | 0     | 0     | 0 | 1      |
| rs679556    | 11 | 119242715 | C | G | 0.806  | 0.4205 | +? | 0     | 0     | 0 | 1      |
| rs4938779   | 11 | 119966884 | C | T | -0.805 | 0.4206 | -? | 0     | 0     | 0 | 1      |
| rs7101592   | 11 | 116668867 | A | T | -0.805 | 0.4207 | -- | 0     | 0.947 | 1 | 0.3304 |
| rs476469    | 11 | 117173560 | T | C | 0.805  | 0.421  | +? | 0     | 0     | 0 | 1      |
| rs74422681  | 11 | 118312870 | G | A | -0.805 | 0.421  | +  | -25.8 | 2.385 | 1 | 0.1225 |
| rs4935767   | 11 | 121153312 | G | A | -0.805 | 0.4211 | -? | 0     | 0     | 0 | 1      |
| rs114667713 | 11 | 120128223 | C | T | -0.804 | 0.4213 | -? | 0     | 0     | 0 | 1      |
| rs10790425  | 11 | 121139395 | T | C | -0.804 | 0.4214 | -- | 0     | 0.615 | 1 | 0.4331 |
| rs3887652   | 11 | 118856582 | C | G | -0.804 | 0.4214 | -- | 0     | 0.124 | 1 | 0.7246 |
| rs894678    | 11 | 118172520 | A | G | 0.804  | 0.4214 | +? | 0     | 0     | 0 | 1      |
| rs141859855 | 11 | 117634408 | A | G | 0.804  | 0.4216 | +? | 0     | 0     | 0 | 1      |
| rs608811    | 11 | 117538059 | A | G | -0.804 | 0.4216 | -? | 0     | 0     | 0 | 1      |
| rs58248287  | 11 | 117476375 | G | A | 0.803  | 0.4217 | +? | 0     | 0     | 0 | 1      |
| rs7939570   | 11 | 121145962 | A | C | -0.803 | 0.4217 | -- | 0     | 0.579 | 1 | 0.4467 |
| rs7103203   | 11 | 119501720 | G | A | 0.803  | 0.4218 | +? | 0     | 0     | 0 | 1      |
| rs59258276  | 11 | 117488572 | C | T | 0.803  | 0.4219 | +? | 0     | 0     | 0 | 1      |
| rs7110616   | 11 | 116458051 | T | C | 0.803  | 0.422  | +? | 0     | 0     | 0 | 1      |
| rs10790423  | 11 | 121136688 | C | A | -0.803 | 0.4221 | -- | 0     | 0.351 | 1 | 0.5537 |
| rs10892556  | 11 | 120131591 | G | A | -0.803 | 0.4221 | -? | 0     | 0     | 0 | 1      |
| rs61906081  | 11 | 116537059 | A | G | -0.803 | 0.4221 | -? | 0     | 0     | 0 | 1      |
| rs7105077   | 11 | 119760867 | G | A | -0.803 | 0.4222 | -? | 0     | 0     | 0 | 1      |
| rs12286470  | 11 | 117688517 | C | G | -0.802 | 0.4223 | -? | 0     | 0     | 0 | 1      |
| rs582973    | 11 | 119320333 | T | C | 0.802  | 0.4224 | ++ | -68.4 | 1.781 | 1 | 0.182  |
| rs11601506  | 11 | 116215109 | T | G | -0.802 | 0.4225 | -- | -67.7 | 1.789 | 1 | 0.181  |
| rs3802872   | 11 | 117776526 | G | A | -0.802 | 0.4227 | -? | 0     | 0     | 0 | 1      |
| rs1981988   | 11 | 119365380 | C | G | -0.801 | 0.4229 | -? | 0     | 0     | 0 | 1      |
| rs2041967   | 11 | 116645149 | G | A | -0.801 | 0.4229 | -- | 0     | 0.855 | 1 | 0.355  |
| rs12225131  | 11 | 120090348 | G | A | 0.801  | 0.4231 | +? | 0     | 0     | 0 | 1      |
| rs144199381 | 11 | 117384372 | T | C | 0.801  | 0.4232 | +? | 0     | 0     | 0 | 1      |
| rs17121102  | 11 | 117579111 | C | G | 0.801  | 0.4232 | +? | 0     | 0     | 0 | 1      |
| rs10892375  | 11 | 119368188 | T | C | -0.801 | 0.4234 | -? | 0     | 0     | 0 | 1      |
| rs79914174  | 11 | 116375302 | C | T | 0.801  | 0.4234 | +? | 0     | 0     | 0 | 1      |
| rs34518191  | 11 | 119680745 | G | C | -0.8   | 0.4236 | -? | 0     | 0     | 0 | 1      |
| rs10892374  | 11 | 119368153 | G | A | -0.8   | 0.4238 | -? | 0     | 0     | 0 | 1      |
| rs117843905 | 11 | 120332795 | T | C | 0.8    | 0.4239 | +? | 0     | 0     | 0 | 1      |
| rs12270574  | 11 | 119799851 | T | A | 0.8    | 0.4239 | +? | 0     | 0     | 0 | 1      |
| rs492227    | 11 | 119799829 | T | C | 0.8    | 0.4239 | +? | 0     | 0     | 0 | 1      |
| rs572287    | 11 | 119798818 | A | T | 0.8    | 0.4239 | +? | 0     | 0     | 0 | 1      |
| rs553492    | 11 | 119817670 | A | C | 0.8    | 0.424  | +? | 0     | 0     | 0 | 1      |
| rs562015    | 11 | 119992149 | T | C | 0.8    | 0.424  | +? | 0     | 0     | 0 | 1      |
| rs78238602  | 11 | 116226195 | A | G | -0.8   | 0.424  | -? | 0     | 0     | 0 | 1      |
| rs4938330   | 11 | 116928514 | G | C | -0.799 | 0.4242 | -? | 0     | 0     | 0 | 1      |
| rs607491    | 11 | 119360054 | G | C | 0.799  | 0.4244 | +? | 0     | 0     | 0 | 1      |
| rs72645461  | 11 | 117213847 | G | A | 0.798  | 0.4246 | +? | 0     | 0     | 0 | 1      |
| rs11826841  | 11 | 117790794 | G | A | -0.798 | 0.4249 | -? | 0     | 0     | 0 | 1      |

|              |    |           |   |   |        |        |    |        |       |   |        |
|--------------|----|-----------|---|---|--------|--------|----|--------|-------|---|--------|
| rs35933073   | 11 | 116537846 | A | C | -0.798 | 0.4249 | -? | 0      | 0     | 0 | 1      |
| rs1000315943 | 11 | 121162486 | A | T | -0.798 | 0.425  | -? | 0      | 0     | 0 | 1      |
| rs1787714    | 11 | 116560610 | A | G | 0.798  | 0.425  | +  | 0      | 0     | 0 | 1      |
| rs20493      | 11 | 119957516 | A | G | 0.798  | 0.4251 | +  | 0      | 0     | 0 | 1      |
| rs61899038   | 11 | 119817309 | A | T | 0.797  | 0.4254 | +  | 0      | 0     | 0 | 1      |
| rs80238987   | 11 | 119634544 | A | G | 0.797  | 0.4256 | +  | 0      | 0     | 0 | 1      |
| rs117216310  | 11 | 117457472 | A | C | -0.797 | 0.4257 | -? | 0      | 0     | 0 | 1      |
| rs11216474   | 11 | 117497778 | G | A | -0.796 | 0.4258 | -? | 0      | 0     | 0 | 1      |
| rs2276342    | 11 | 117375489 | C | G | 0.796  | 0.4258 | +  | 0      | 0     | 0 | 1      |
| rs73008621   | 11 | 119693592 | G | C | -0.796 | 0.4259 | -? | 0      | 0     | 0 | 1      |
| rs584994     | 11 | 117751994 | G | T | 0.796  | 0.426  | +  | 0      | 0     | 0 | 1      |
| rs76109832   | 11 | 118755946 | T | C | 0.796  | 0.426  | ++ | 0      | 0.075 | 1 | 0.7847 |
| rs549303     | 11 | 119362888 | C | T | 0.795  | 0.4264 | +  | 0      | 0     | 0 | 1      |
| rs141047910  | 11 | 117436510 | C | G | 0.795  | 0.4268 | +  | 0      | 0     | 0 | 1      |
| rs7112232    | 11 | 119320444 | A | G | 0.795  | 0.4268 | -+ | -43.5  | 2.09  | 1 | 0.1482 |
| rs573442     | 11 | 117177920 | T | C | -0.795 | 0.4269 | -? | 0      | 0     | 0 | 1      |
| rs7116918    | 11 | 117492654 | G | A | -0.794 | 0.427  | -? | 0      | 0     | 0 | 1      |
| rs11216646   | 11 | 117824158 | G | A | -0.794 | 0.4271 | -- | 0      | 0.43  | 1 | 0.512  |
| rs3782042    | 11 | 118185919 | A | G | 0.794  | 0.4272 | +  | 0      | 0     | 0 | 1      |
| rs507622     | 11 | 119764234 | A | G | -0.794 | 0.4272 | -? | 0      | 0     | 0 | 1      |
| rs10892455   | 11 | 119647079 | C | T | 0.794  | 0.4273 | ++ | 0      | 0.018 | 1 | 0.8929 |
| rs593380     | 11 | 117538766 | C | T | -0.794 | 0.4274 | -? | 0      | 0     | 0 | 1      |
| rs7939478    | 11 | 121145976 | C | A | -0.794 | 0.4274 | -- | 0      | 0.537 | 1 | 0.4637 |
| rs12793790   | 11 | 118140372 | A | G | 0.793  | 0.4275 | +  | 0      | 0     | 0 | 1      |
| rs11217467   | 11 | 119628785 | A | G | -0.793 | 0.4276 | -? | 0      | 0     | 0 | 1      |
| rs6589695    | 11 | 118644323 | C | G | 0.793  | 0.4276 | ++ | 0      | 0.134 | 1 | 0.7143 |
| rs141270315  | 11 | 119000331 | T | C | -0.793 | 0.4277 | -? | 0      | 0     | 0 | 1      |
| rs148543195  | 11 | 117488030 | T | C | 0.793  | 0.4277 | +  | 0      | 0     | 0 | 1      |
| rs3863318    | 11 | 117811167 | A | C | 0.793  | 0.4277 | ++ | -175.3 | 1.09  | 1 | 0.2965 |
| rs79487987   | 11 | 119006788 | A | G | -0.793 | 0.4277 | -? | 0      | 0     | 0 | 1      |
| rs7123597    | 11 | 117594443 | A | C | 0.792  | 0.4282 | +  | 0      | 0     | 0 | 1      |
| rs12808105   | 11 | 117637213 | T | C | 0.792  | 0.4283 | +  | 0      | 0     | 0 | 1      |
| rs1941298    | 11 | 121108865 | T | C | 0.792  | 0.4283 | +  | 0      | 0     | 0 | 1      |
| rs34986626   | 11 | 117494151 | A | G | -0.792 | 0.4284 | -? | 0      | 0     | 0 | 1      |
| rs476636     | 11 | 120326277 | G | A | 0.792  | 0.4285 | ++ | -117.1 | 1.382 | 1 | 0.2398 |
| rs7121512    | 11 | 116455707 | G | T | 0.792  | 0.4286 | +  | 0      | 0     | 0 | 1      |
| rs74883244   | 11 | 120200571 | G | A | -0.792 | 0.4286 | -? | 0      | 0     | 0 | 1      |
| rs10790195   | 11 | 117496132 | C | T | -0.791 | 0.4287 | -? | 0      | 0     | 0 | 1      |
| rs149703780  | 11 | 118993801 | A | G | -0.791 | 0.4288 | -? | 0      | 0     | 0 | 1      |
| rs571812     | 11 | 116246514 | T | C | -0.791 | 0.4288 | -? | 0      | 0     | 0 | 1      |
| rs624588     | 11 | 118995353 | C | G | 0.791  | 0.4289 | +  | 0      | 0     | 0 | 1      |
| rs10892351   | 11 | 119218530 | T | G | 0.791  | 0.429  | +  | 0      | 0     | 0 | 1      |
| rs2257206    | 11 | 120401656 | T | C | 0.791  | 0.429  | +  | 0      | 0     | 0 | 1      |
| rs7113362    | 11 | 116454261 | A | G | 0.791  | 0.4291 | +  | 0      | 0     | 0 | 1      |
| rs7128378    | 11 | 119989630 | A | G | -0.791 | 0.4291 | -? | 0      | 0     | 0 | 1      |
| rs7948174    | 11 | 121141005 | T | G | -0.791 | 0.4291 | -- | 0      | 0.553 | 1 | 0.4572 |
| rs10790152   | 11 | 116457650 | G | A | 0.79   | 0.4293 | +  | 0      | 0     | 0 | 1      |
| rs150339153  | 11 | 118285369 | T | C | 0.79   | 0.4294 | +- | 0      | 0.343 | 1 | 0.5579 |
| rs497768     | 11 | 117750740 | C | G | 0.79   | 0.4294 | +  | 0      | 0     | 0 | 1      |
| rs6589624    | 11 | 117717297 | G | A | 0.79   | 0.4295 | +  | 0      | 0     | 0 | 1      |
| rs7115714    | 11 | 120294861 | A | G | -0.79  | 0.4295 | -? | 0      | 0     | 0 | 1      |
| rs11216655   | 11 | 117836519 | T | C | -0.79  | 0.4296 | -- | 0      | 0.526 | 1 | 0.4684 |
| rs1423902581 | 11 | 116688765 | C | A | 0.79   | 0.4298 | +  | 0      | 0     | 0 | 1      |
| rs10790241   | 11 | 118013034 | A | G | -0.789 | 0.43   | -- | 0      | 0.676 | 1 | 0.4109 |
| rs73008622   | 11 | 119693648 | T | C | -0.789 | 0.43   | -? | 0      | 0     | 0 | 1      |
| rs10892110   | 11 | 117322917 | C | A | 0.789  | 0.4301 | +  | 0      | 0     | 0 | 1      |

|             |    |           |   |   |        |        |   |       |       |   |         |
|-------------|----|-----------|---|---|--------|--------|---|-------|-------|---|---------|
| rs2846097   | 11 | 120649962 | C | G | 0.789  | 0.4301 | + | 0     | 0     | 0 | 1       |
| rs10892442  | 11 | 119592454 | G | A | 0.789  | 0.4302 | + | 0     | 0     | 0 | 1       |
| rs12800436  | 11 | 116558802 | T | G | -0.789 | 0.4303 | - | 0     | 0     | 0 | 1       |
| rs7130716   | 11 | 119318306 | A | G | 0.789  | 0.4303 | + | -42.9 | 2.1   | 1 | 0.1473  |
| rs12795905  | 11 | 118140597 | T | C | 0.789  | 0.4304 | + | 0     | 0     | 0 | 1       |
| rs111716733 | 11 | 120784745 | T | C | -0.788 | 0.4305 | - | 0     | 0     | 0 | 1       |
| rs11216024  | 11 | 116461333 | G | A | 0.788  | 0.4306 | + | 0     | 0     | 0 | 1       |
| rs11216433  | 11 | 117380103 | G | A | 0.788  | 0.4306 | + | 0     | 0     | 0 | 1       |
| rs2070669   | 11 | 116701122 | C | G | 0.788  | 0.4306 | + | 0     | 0     | 0 | 1       |
| rs73010439  | 11 | 117132315 | G | T | 0.788  | 0.4306 | + | 0     | 0     | 0 | 1       |
| rs76860051  | 11 | 116525306 | C | A | -0.788 | 0.4306 | - | 0     | 0     | 0 | 1       |
| rs118176355 | 11 | 117696521 | C | G | 0.788  | 0.4307 | + | 0     | 0     | 0 | 1       |
| rs2727784   | 11 | 116711141 | C | T | 0.788  | 0.4307 | + | 0     | 0     | 0 | 1       |
| rs7942226   | 11 | 117617279 | C | T | 0.788  | 0.4308 | + | 0     | 0     | 0 | 1       |
| rs12420418  | 11 | 118840857 | T | C | -0.787 | 0.4313 | - | 0     | 0     | 0 | 1       |
| rs2017122   | 11 | 118314849 | T | C | -0.787 | 0.4314 | + | -110  | 1.428 | 1 | 0.232   |
| rs11606047  | 11 | 119985246 | G | A | -0.787 | 0.4315 | - | 0     | 0     | 0 | 1       |
| rs56410112  | 11 | 118193468 | C | T | 0.787  | 0.4315 | + | 0     | 0     | 0 | 1       |
| rs7105861   | 11 | 119070910 | G | C | -0.787 | 0.4315 | - | 0     | 0     | 0 | 1       |
| rs621150    | 11 | 119847991 | T | C | -0.786 | 0.4318 | - | 0     | 0     | 0 | 1       |
| rs6589737   | 11 | 119295647 | C | T | 0.786  | 0.432  | + | -34.8 | 2.225 | 1 | 0.1358  |
| rs641382    | 11 | 119006300 | A | C | 0.786  | 0.4321 | + | 0     | 0     | 0 | 1       |
| rs7126377   | 11 | 119223386 | A | G | 0.785  | 0.4324 | + | 0     | 0     | 0 | 1       |
| rs1941297   | 11 | 121108679 | T | C | 0.785  | 0.4325 | + | 0     | 0     | 0 | 1       |
| rs652824    | 11 | 119884981 | C | T | 0.785  | 0.4325 | + | 0     | 0     | 0 | 1       |
| rs4938307   | 11 | 116604514 | A | G | -0.785 | 0.4326 | + | 0     | 0.586 | 1 | 0.444   |
| rs10790331  | 11 | 119552057 | C | A | 0.785  | 0.4327 | + | 0     | 0     | 0 | 1       |
| rs12786234  | 11 | 117638032 | A | G | 0.785  | 0.4327 | + | 0     | 0     | 0 | 1       |
| rs3132780   | 11 | 120620159 | G | A | -0.784 | 0.4328 | - | 0     | 0     | 0 | 1       |
| rs1366878   | 11 | 119367405 | T | C | -0.784 | 0.4329 | - | 0     | 0     | 0 | 1       |
| rs671111    | 11 | 117988539 | A | G | 0.784  | 0.4331 | + | 0     | 0.088 | 1 | 0.7669  |
| rs72995856  | 11 | 120647474 | C | T | 0.784  | 0.4331 | + | 0     | 0     | 0 | 1       |
| rs75905572  | 11 | 119005900 | G | C | -0.784 | 0.4331 | - | 0     | 0     | 0 | 1       |
| rs2305821   | 11 | 117153420 | C | T | -0.783 | 0.4334 | - | 0     | 0     | 0 | 1       |
| rs491812    | 11 | 117328559 | T | C | 0.783  | 0.4334 | + | 0     | 0     | 0 | 1       |
| rs1545509   | 11 | 119927888 | A | G | -0.783 | 0.4335 | - | 0     | 0     | 0 | 1       |
| rs3740724   | 11 | 119859475 | T | C | -0.783 | 0.4335 | - | 0     | 0     | 0 | 1       |
| rs4938633   | 11 | 119026328 | A | G | -0.783 | 0.4335 | - | 0     | 0     | 0 | 1       |
| rs7110192   | 11 | 116457744 | G | C | 0.783  | 0.4335 | + | 0     | 0     | 0 | 1       |
| rs17123780  | 11 | 120157863 | A | G | -0.783 | 0.4336 | - | 0     | 0.075 | 1 | 0.7836  |
| rs1047857   | 11 | 117158858 | G | A | -0.782 | 0.4341 | - | 0     | 0     | 0 | 1       |
| rs187164533 | 11 | 118709275 | A | G | -0.782 | 0.4341 | + | 0     | 0.755 | 1 | 0.3848  |
| rs12789276  | 11 | 118140203 | G | A | 0.782  | 0.4342 | + | 0     | 0     | 0 | 1       |
| rs6589740   | 11 | 119311477 | T | C | 0.782  | 0.4342 | + | -34.4 | 2.232 | 1 | 0.1352  |
| rs9645661   | 11 | 116269032 | A | G | -0.782 | 0.4342 | - | 0     | 0     | 0 | 1       |
| rs540716    | 11 | 118685015 | T | C | -0.781 | 0.4345 | + | 0     | 0.719 | 1 | 0.3964  |
| rs71480344  | 11 | 117442767 | G | A | -0.781 | 0.4346 | - | 0     | 0     | 0 | 1       |
| rs2622935   | 11 | 117010758 | A | G | 0.781  | 0.4349 | + | 0     | 0     | 0 | 1       |
| rs2068412   | 11 | 117574296 | G | A | 0.781  | 0.435  | + | 0     | 0     | 0 | 1       |
| rs11217852  | 11 | 120261187 | G | A | -0.78  | 0.4351 | - | 0     | 0     | 0 | 1       |
| rs61900905  | 11 | 118185492 | C | T | -0.78  | 0.4351 | + | 3     | 3.094 | 1 | 0.07861 |
| rs112552940 | 11 | 118509877 | T | C | -0.78  | 0.4352 | + | 0     | 0.859 | 1 | 0.3539  |
| rs11602073  | 11 | 116646858 | T | C | -0.78  | 0.4352 | + | 0     | 0.492 | 1 | 0.4832  |
| rs11217773  | 11 | 120115450 | A | G | -0.78  | 0.4354 | - | 0     | 0     | 0 | 1       |
| rs12274203  | 11 | 117111913 | A | C | -0.78  | 0.4354 | - | 0     | 0     | 0 | 1       |
| rs34786601  | 11 | 118140136 | C | T | 0.78   | 0.4354 | + | 0     | 0     | 0 | 1       |

|             |    |           |   |   |        |        |   |       |       |   |         |
|-------------|----|-----------|---|---|--------|--------|---|-------|-------|---|---------|
| rs11216187  | 11 | 116787148 | T | C | 0.78   | 0.4355 | + | 0     | 0     | 0 | 1       |
| rs11608135  | 11 | 119941819 | A | G | -0.78  | 0.4355 | - | 0     | 0     | 0 | 1       |
| rs12286404  | 11 | 117144355 | C | T | -0.78  | 0.4356 | - | 0     | 0     | 0 | 1       |
| rs12292027  | 11 | 117149405 | G | A | -0.78  | 0.4356 | - | 0     | 0     | 0 | 1       |
| rs75562690  | 11 | 117655971 | T | C | 0.78   | 0.4356 | + | 0     | 0.007 | 1 | 0.9332  |
| rs12789293  | 11 | 117532692 | T | C | 0.779  | 0.4359 | + | 0     | 0.008 | 1 | 0.9266  |
| rs1944497   | 11 | 119877773 | G | A | -0.779 | 0.4359 | - | 0     | 0     | 0 | 1       |
| rs17570978  | 11 | 116457391 | T | C | 0.779  | 0.4361 | + | 0     | 0.003 | 1 | 0.9565  |
| rs10892228  | 11 | 118111346 | G | A | -0.779 | 0.4362 | - | 0     | 0     | 0 | 1       |
| rs10750140  | 11 | 119323284 | T | C | 0.778  | 0.4363 | - | -41.7 | 2.117 | 1 | 0.1456  |
| rs59255055  | 11 | 118296735 | A | C | 0.778  | 0.4363 | + | 0     | 0.018 | 1 | 0.8932  |
| rs11216678  | 11 | 117883941 | G | C | -0.778 | 0.4364 | - | 0     | 0.168 | 1 | 0.6816  |
| rs61900902  | 11 | 118159684 | C | T | 0.778  | 0.4365 | + | 0     | 0     | 0 | 1       |
| rs4252254   | 11 | 117861055 | T | C | 0.778  | 0.4366 | + | 0     | 0.308 | 1 | 0.5789  |
| rs7924975   | 11 | 120233564 | C | G | -0.778 | 0.4366 | - | 0     | 0     | 0 | 1       |
| rs10790339  | 11 | 119594525 | C | T | 0.777  | 0.4369 | + | 0     | 0     | 0 | 1       |
| rs11606588  | 11 | 117302038 | C | G | 0.777  | 0.4369 | + | 0     | 0     | 0 | 1       |
| rs7952138   | 11 | 118953952 | G | A | -0.777 | 0.4369 | - | 0     | 0     | 0 | 1       |
| rs11217768  | 11 | 120086680 | A | G | 0.777  | 0.437  | + | 0     | 0     | 0 | 1       |
| rs1942478   | 11 | 116651463 | G | T | -0.777 | 0.4371 | - | 0     | 0.495 | 1 | 0.4816  |
| rs12364374  | 11 | 117849268 | A | G | 0.777  | 0.4372 | + | 0     | 0.437 | 1 | 0.5088  |
| rs1530919   | 11 | 119905908 | A | G | -0.777 | 0.4372 | - | 0     | 0     | 0 | 1       |
| rs3824978   | 11 | 120732508 | T | C | -0.777 | 0.4373 | - | 0     | 0     | 0 | 1       |
| rs11607103  | 11 | 117582279 | C | T | 0.777  | 0.4374 | + | 0     | 0     | 0 | 1       |
| rs76200019  | 11 | 120701346 | A | G | 0.776  | 0.4376 | + | 0     | 0     | 0 | 1       |
| rs644252    | 11 | 119043500 | T | G | -0.776 | 0.4378 | - | 0     | 0     | 0 | 1       |
| rs59005463  | 11 | 121139928 | A | G | -0.776 | 0.4379 | - | 0     | 0     | 0 | 1       |
| rs4938754   | 11 | 119877246 | T | C | -0.776 | 0.438  | - | 0     | 0     | 0 | 1       |
| rs616458    | 11 | 119000044 | C | G | 0.776  | 0.438  | + | 0     | 0     | 0 | 1       |
| rs1373270   | 11 | 120324080 | A | G | -0.775 | 0.4382 | - | 0     | 0     | 0 | 1       |
| rs549289    | 11 | 117358220 | C | A | 0.775  | 0.4383 | + | 0     | 0     | 0 | 1       |
| rs2155169   | 11 | 119857163 | G | A | -0.775 | 0.4384 | - | 0     | 0     | 0 | 1       |
| rs4938634   | 11 | 119026330 | C | A | -0.775 | 0.4384 | - | 0     | 0     | 0 | 1       |
| rs7125990   | 11 | 117105726 | G | A | -0.775 | 0.4384 | - | 0     | 0     | 0 | 1       |
| rs140967993 | 11 | 118264353 | G | A | 0.775  | 0.4385 | + | 3.4   | 3.105 | 1 | 0.07804 |
| rs73014325  | 11 | 117196435 | A | C | -0.775 | 0.4385 | - | 0     | 0     | 0 | 1       |
| rs652872    | 11 | 118996781 | A | G | 0.774  | 0.4387 | + | 0     | 0     | 0 | 1       |
| rs67422215  | 11 | 117776003 | T | C | 0.774  | 0.4387 | + | 0     | 0     | 0 | 1       |
| rs11218041  | 11 | 120749953 | G | C | -0.774 | 0.4389 | - | 0     | 0     | 0 | 1       |
| rs117745694 | 11 | 118218491 | A | G | 0.774  | 0.4389 | + | 0     | 0.008 | 1 | 0.9304  |
| rs11216135  | 11 | 116646062 | G | C | -0.774 | 0.4391 | - | 0     | 0.486 | 1 | 0.4856  |
| rs1892904   | 11 | 117117973 | G | A | -0.774 | 0.4392 | - | 0     | 0     | 0 | 1       |
| rs79990075  | 11 | 118267686 | T | C | 0.773  | 0.4393 | + | 2.1   | 3.064 | 1 | 0.08005 |
| rs61897956  | 11 | 119958757 | A | G | -0.773 | 0.4394 | - | 0     | 0     | 0 | 1       |
| rs484553    | 11 | 117201097 | T | G | 0.773  | 0.4398 | + | 0     | 0     | 0 | 1       |
| rs4938635   | 11 | 119026460 | T | C | -0.773 | 0.4398 | - | 0     | 0     | 0 | 1       |
| rs2096884   | 11 | 120173354 | A | G | 0.772  | 0.4399 | + | 0     | 0     | 0 | 1       |
| rs7126048   | 11 | 121140526 | G | A | -0.772 | 0.4399 | - | 0     | 0.578 | 1 | 0.4471  |
| rs100803    | 11 | 119005132 | T | C | 0.772  | 0.4401 | + | 0     | 0     | 0 | 1       |
| rs662069    | 11 | 119003322 | A | C | 0.772  | 0.4401 | + | 0     | 0     | 0 | 1       |
| rs7116825   | 11 | 116454503 | A | C | 0.772  | 0.4401 | + | 0     | 0     | 0 | 1       |
| rs7234      | 11 | 119005485 | T | C | 0.772  | 0.4401 | + | 0     | 0     | 0 | 1       |
| rs880487    | 11 | 120063980 | C | T | -0.772 | 0.4401 | - | 0     | 0     | 0 | 1       |
| rs4417316   | 11 | 116652301 | T | C | -0.772 | 0.4402 | - | 0     | 0.491 | 1 | 0.4835  |
| rs4938636   | 11 | 119026469 | T | A | -0.772 | 0.4402 | - | 0     | 0     | 0 | 1       |
| rs59511712  | 11 | 116945762 | T | C | -0.772 | 0.4403 | - | 0     | 0     | 0 | 1       |

|             |    |           |   |   |        |        |    |       |       |   |        |
|-------------|----|-----------|---|---|--------|--------|----|-------|-------|---|--------|
| rs1838757   | 11 | 116785083 | G | C | 0.772  | 0.4404 | +  | 0     | 0     | 0 | 1      |
| rs74886004  | 11 | 116457471 | T | C | 0.771  | 0.4404 | ++ | 0     | 0.003 | 1 | 0.9532 |
| rs12787452  | 11 | 117769938 | G | C | -0.771 | 0.4405 | -? | 0     | 0     | 0 | 1      |
| rs2715883   | 11 | 120133494 | G | A | -0.771 | 0.4405 | -? | 0     | 0     | 0 | 1      |
| rs599343    | 11 | 117994430 | A | G | 0.771  | 0.4405 | ++ | 0     | 0.089 | 1 | 0.7658 |
| rs185433085 | 11 | 117106069 | T | C | -0.771 | 0.4406 | -? | 0     | 0     | 0 | 1      |
| rs7931316   | 11 | 119585681 | C | T | -0.771 | 0.4409 | -? | 0     | 0     | 0 | 1      |
| rs10892578  | 11 | 120308290 | G | A | -0.77  | 0.4411 | -? | 0     | 0     | 0 | 1      |
| rs117236359 | 11 | 119573655 | T | C | -0.77  | 0.4412 | -? | 0     | 0     | 0 | 1      |
| rs2512148   | 11 | 117873048 | A | C | 0.77   | 0.4412 | ++ | 0     | 0.011 | 1 | 0.9148 |
| rs948028    | 11 | 120644447 | C | A | 0.77   | 0.4413 | +  | 0     | 0     | 0 | 1      |
| rs116857027 | 11 | 116525995 | T | C | -0.77  | 0.4414 | -? | 0     | 0     | 0 | 1      |
| rs1784128   | 11 | 116538689 | A | G | 0.77   | 0.4414 | +  | 0     | 0     | 0 | 1      |
| rs10790189  | 11 | 117327216 | C | A | 0.77   | 0.4415 | +  | 0     | 0     | 0 | 1      |
| rs672189    | 11 | 119004009 | T | G | 0.769  | 0.4417 | +  | 0     | 0     | 0 | 1      |
| rs7941794   | 11 | 117499026 | A | C | 0.769  | 0.4417 | +  | 0     | 0     | 0 | 1      |
| rs11218073  | 11 | 120817900 | T | C | -0.769 | 0.442  | -+ | 0     | 0.659 | 1 | 0.4171 |
| rs113460600 | 11 | 119765177 | A | G | -0.769 | 0.4421 | -? | 0     | 0     | 0 | 1      |
| rs12275546  | 11 | 118109097 | G | A | -0.769 | 0.4421 | -? | 0     | 0     | 0 | 1      |
| rs7924968   | 11 | 117619538 | A | T | 0.769  | 0.4421 | +  | 0     | 0     | 0 | 1      |
| rs7952199   | 11 | 121142126 | G | C | -0.768 | 0.4423 | -- | 0     | 0.512 | 1 | 0.4745 |
| rs10790190  | 11 | 117361447 | G | A | 0.768  | 0.4424 | +  | 0     | 0     | 0 | 1      |
| rs2512143   | 11 | 117860582 | A | G | 0.768  | 0.4424 | ++ | 0     | 0.157 | 1 | 0.6917 |
| rs12420530  | 11 | 119907605 | T | G | -0.768 | 0.4426 | -? | 0     | 0     | 0 | 1      |
| rs4531505   | 11 | 116427570 | C | G | 0.768  | 0.4426 | ++ | 0     | 0.188 | 1 | 0.6645 |
| rs10502242  | 11 | 120641004 | G | A | 0.768  | 0.4427 | +  | 0     | 0     | 0 | 1      |
| rs17124301  | 11 | 120642698 | C | T | 0.768  | 0.4427 | +  | 0     | 0     | 0 | 1      |
| rs72995844  | 11 | 120642631 | G | A | 0.768  | 0.4427 | +  | 0     | 0     | 0 | 1      |
| rs7118414   | 11 | 117811548 | C | G | -0.767 | 0.443  | -? | 0     | 0     | 0 | 1      |
| rs79876834  | 11 | 117584155 | T | C | 0.767  | 0.443  | +  | 0     | 0     | 0 | 1      |
| rs11216777  | 11 | 117997722 | G | T | -0.767 | 0.4432 | -- | 0     | 0.455 | 1 | 0.5    |
| rs35963862  | 11 | 116549897 | C | T | -0.767 | 0.4432 | -? | 0     | 0     | 0 | 1      |
| rs895649    | 11 | 119751585 | G | A | 0.767  | 0.4432 | +  | 0     | 0     | 0 | 1      |
| rs693147    | 11 | 117266754 | A | C | 0.767  | 0.4433 | +  | 0     | 0     | 0 | 1      |
| rs7951250   | 11 | 120309036 | G | A | -0.766 | 0.4437 | -? | 0     | 0     | 0 | 1      |
| rs4938657   | 11 | 119314718 | C | T | 0.766  | 0.4438 | -+ | -32.8 | 2.259 | 1 | 0.1328 |
| rs1374563   | 11 | 119762569 | A | G | -0.766 | 0.4439 | -? | 0     | 0     | 0 | 1      |
| rs11606452  | 11 | 120498485 | C | G | 0.765  | 0.4441 | +  | 0     | 0     | 0 | 1      |
| rs7128900   | 11 | 116363446 | G | T | -0.765 | 0.4441 | -? | 0     | 0     | 0 | 1      |
| rs4936515   | 11 | 120208185 | G | A | 0.765  | 0.4442 | +  | 0     | 0     | 0 | 1      |
| rs75013797  | 11 | 117200129 | T | C | 0.765  | 0.4443 | +  | 0     | 0     | 0 | 1      |
| rs7927300   | 11 | 117791132 | A | C | -0.765 | 0.4445 | -? | 0     | 0     | 0 | 1      |
| rs10790427  | 11 | 121139585 | G | A | -0.764 | 0.4448 | -- | 0     | 0.695 | 1 | 0.4044 |
| rs537153    | 11 | 119004026 | T | C | 0.764  | 0.4448 | +  | 0     | 0     | 0 | 1      |
| rs17121106  | 11 | 117581866 | C | T | 0.764  | 0.445  | +  | 0     | 0     | 0 | 1      |
| rs75160858  | 11 | 119876827 | A | G | -0.764 | 0.445  | -? | 0     | 0     | 0 | 1      |
| rs4936406   | 11 | 117618437 | C | T | 0.764  | 0.4451 | +  | 0     | 0     | 0 | 1      |
| rs56679414  | 11 | 119016547 | T | C | -0.764 | 0.4451 | -? | 0     | 0     | 0 | 1      |
| rs584057    | 11 | 117331503 | C | T | 0.763  | 0.4452 | +  | 0     | 0     | 0 | 1      |
| rs10790296  | 11 | 119310379 | A | G | 0.763  | 0.4453 | -+ | -43.3 | 2.093 | 1 | 0.148  |
| rs2070667   | 11 | 116701669 | A | G | -0.762 | 0.4459 | -? | 0     | 0     | 0 | 1      |
| rs587099    | 11 | 117509143 | G | A | -0.762 | 0.446  | -? | 0     | 0     | 0 | 1      |
| rs55927184  | 11 | 119015371 | A | G | -0.762 | 0.4463 | -? | 0     | 0     | 0 | 1      |
| rs517599    | 11 | 116329185 | C | T | -0.761 | 0.4464 | -? | 0     | 0     | 0 | 1      |
| rs10790362  | 11 | 119865290 | T | C | 0.761  | 0.4465 | +  | 0     | 0     | 0 | 1      |
| rs10892198  | 11 | 117801262 | G | C | 0.761  | 0.4466 | +  | 0     | 0     | 0 | 1      |

|              |    |           |   |   |        |        |    |     |       |   |         |
|--------------|----|-----------|---|---|--------|--------|----|-----|-------|---|---------|
| rs58359402   | 11 | 120702378 | G | A | 0.761  | 0.4468 | +? | 0   | 0     | 0 | 1       |
| rs118013839  | 11 | 116561514 | A | G | -0.761 | 0.4469 | -- | 0   | 0.004 | 1 | 0.9521  |
| rs7108217    | 11 | 120183794 | T | C | -0.76  | 0.4471 | -? | 0   | 0     | 0 | 1       |
| rs7395055    | 11 | 119703507 | C | T | 0.759  | 0.4476 | +? | 0   | 0     | 0 | 1       |
| rs7930587    | 11 | 116388998 | A | T | -0.759 | 0.4478 | -? | 0   | 0     | 0 | 1       |
| rs1125618    | 11 | 119970300 | T | C | -0.759 | 0.4479 | -? | 0   | 0     | 0 | 1       |
| rs77772751   | 11 | 120872008 | A | G | -0.759 | 0.448  | -? | 0   | 0     | 0 | 1       |
| rs11606421   | 11 | 120623682 | T | C | 0.758  | 0.4482 | +? | 0   | 0     | 0 | 1       |
| rs541563     | 11 | 116329750 | A | G | -0.758 | 0.4482 | -? | 0   | 0     | 0 | 1       |
| rs55852239   | 11 | 118139755 | A | G | 0.758  | 0.4482 | +? | 0   | 0     | 0 | 1       |
| rs7117063    | 11 | 120238824 | C | T | -0.758 | 0.4482 | -? | 0   | 0     | 0 | 1       |
| rs2015914    | 11 | 120137818 | A | G | -0.758 | 0.4483 | -? | 0   | 0     | 0 | 1       |
| rs1939234    | 11 | 117557380 | T | C | 0.758  | 0.4484 | +? | 0   | 0     | 0 | 1       |
| rs876479     | 11 | 118028094 | T | C | 0.758  | 0.4485 | +? | 0   | 0     | 0 | 1       |
| rs12790585   | 11 | 120000608 | A | G | -0.758 | 0.4486 | -? | 0   | 0     | 0 | 1       |
| rs471714     | 11 | 119817579 | A | T | 0.758  | 0.4486 | +? | 0   | 0     | 0 | 1       |
| rs472665     | 11 | 119817708 | T | C | 0.758  | 0.4486 | +? | 0   | 0     | 0 | 1       |
| rs476877     | 11 | 119819087 | C | T | 0.758  | 0.4486 | +? | 0   | 0     | 0 | 1       |
| rs580318     | 11 | 119817426 | C | A | 0.758  | 0.4486 | +? | 0   | 0     | 0 | 1       |
| rs34172482   | 11 | 120278477 | G | A | 0.758  | 0.4487 | +? | 0   | 0     | 0 | 1       |
| rs7131597    | 11 | 120303939 | T | G | -0.757 | 0.4488 | -? | 0   | 0     | 0 | 1       |
| rs75050717   | 11 | 120960054 | A | G | -0.757 | 0.4488 | -? | 0   | 0     | 0 | 1       |
| rs10892498   | 11 | 119806226 | T | G | -0.757 | 0.449  | -? | 0   | 0     | 0 | 1       |
| rs755537     | 11 | 117768409 | G | A | 0.757  | 0.449  | +? | 0   | 0     | 0 | 1       |
| rs11216397   | 11 | 117319998 | C | T | 0.757  | 0.4491 | +? | 0   | 0     | 0 | 1       |
| rs688790     | 11 | 117541521 | A | T | -0.757 | 0.4492 | -? | 0   | 0     | 0 | 1       |
| rs12574466   | 11 | 119813518 | A | G | -0.757 | 0.4493 | -? | 0   | 0     | 0 | 1       |
| rs180326     | 11 | 116624703 | G | T | -0.757 | 0.4493 | -- | 0   | 0.066 | 1 | 0.797   |
| rs3802878    | 11 | 117414844 | C | A | 0.756  | 0.4497 | +? | 0   | 0     | 0 | 1       |
| rs472232     | 11 | 119701826 | A | C | 0.756  | 0.4497 | +? | 0   | 0     | 0 | 1       |
| rs73010960   | 11 | 116221203 | A | C | -0.756 | 0.4497 | -- | 0   | 0.136 | 1 | 0.7121  |
| rs12803249   | 11 | 116536418 | G | A | -0.756 | 0.4498 | -? | 0   | 0     | 0 | 1       |
| rs4298914    | 11 | 120443983 | T | C | -0.756 | 0.4498 | -? | 0   | 0     | 0 | 1       |
| rs3819250    | 11 | 118185346 | A | G | -0.755 | 0.4501 | ++ | 1.4 | 3.043 | 1 | 0.08108 |
| rs1784119    | 11 | 116562805 | T | C | 0.755  | 0.4503 | +? | 0   | 0     | 0 | 1       |
| rs476362     | 11 | 116485599 | A | G | -0.755 | 0.4503 | -? | 0   | 0     | 0 | 1       |
| rs61903699   | 11 | 117145582 | T | C | -0.755 | 0.4503 | -? | 0   | 0     | 0 | 1       |
| rs11822160   | 11 | 116577558 | A | T | -0.755 | 0.4505 | -- | 0   | 0.933 | 1 | 0.334   |
| rs79112951   | 11 | 116621972 | T | C | -0.754 | 0.4509 | -? | 0   | 0     | 0 | 1       |
| rs10790338   | 11 | 119586389 | G | T | 0.754  | 0.451  | +? | 0   | 0     | 0 | 1       |
| rs10892440   | 11 | 119584274 | T | C | 0.754  | 0.451  | +? | 0   | 0     | 0 | 1       |
| rs7931978    | 11 | 119586117 | G | A | 0.754  | 0.451  | +? | 0   | 0     | 0 | 1       |
| rs12418744   | 11 | 117084537 | A | G | -0.753 | 0.4513 | -? | 0   | 0     | 0 | 1       |
| rs17245504   | 11 | 120178753 | G | T | -0.753 | 0.4513 | -? | 0   | 0     | 0 | 1       |
| rs7107756    | 11 | 118717708 | A | G | 0.753  | 0.4514 | ++ | 0   | 0.014 | 1 | 0.9047  |
| rs12270280   | 11 | 118791150 | T | C | -0.753 | 0.4515 | -- | 0   | 0.007 | 1 | 0.9338  |
| rs11824814   | 11 | 120632841 | T | A | 0.753  | 0.4517 | +? | 0   | 0     | 0 | 1       |
| rs73562888   | 11 | 119016361 | C | T | -0.752 | 0.4521 | -? | 0   | 0     | 0 | 1       |
| rs73014900   | 11 | 116554198 | G | T | 0.752  | 0.4523 | +? | 0   | 0     | 0 | 1       |
| rs10790429   | 11 | 121147301 | A | T | -0.751 | 0.4524 | -- | 0   | 0.472 | 1 | 0.4919  |
| rs7126328    | 11 | 120244577 | T | C | -0.751 | 0.4524 | -? | 0   | 0     | 0 | 1       |
| rs4252241    | 11 | 117855295 | G | A | 0.751  | 0.4525 | +- | 0   | 0.27  | 1 | 0.6035  |
| rs191301146  | 11 | 116271393 | T | C | 0.751  | 0.4526 | +? | 0   | 0     | 0 | 1       |
| rs12278200   | 11 | 116367859 | C | G | 0.751  | 0.4527 | +? | 0   | 0     | 0 | 1       |
| rs77073823   | 11 | 117129083 | T | C | -0.751 | 0.4529 | -? | 0   | 0     | 0 | 1       |
| rs1157011088 | 11 | 120807571 | T | G | 0.75   | 0.4531 | +? | 0   | 0     | 0 | 1       |

|              |    |           |   |   |        |        |    |        |       |   |         |
|--------------|----|-----------|---|---|--------|--------|----|--------|-------|---|---------|
| rs61903746   | 11 | 117255283 | T | C | -0.75  | 0.4531 | -? | 0      | 0     | 0 | 1       |
| rs17569676   | 11 | 116399249 | C | T | -0.75  | 0.4533 | -? | 0      | 0     | 0 | 1       |
| rs688415     | 11 | 117541577 | G | A | -0.749 | 0.4536 | -? | 0      | 0     | 0 | 1       |
| rs7945884    | 11 | 119062889 | C | T | -0.749 | 0.4537 | -? | 0      | 0     | 0 | 1       |
| rs11218114   | 11 | 120893054 | A | G | -0.749 | 0.4538 | -? | 0      | 0     | 0 | 1       |
| rs2298767    | 11 | 117374470 | T | C | -0.749 | 0.4539 | -? | 0      | 0     | 0 | 1       |
| rs751417     | 11 | 121164440 | G | A | -0.749 | 0.4539 | -? | 0      | 0     | 0 | 1       |
| rs9651696    | 11 | 120562930 | C | T | -0.749 | 0.4539 | -? | 0      | 0     | 0 | 1       |
| rs2298821    | 11 | 118185140 | C | T | -0.749 | 0.454  | +  | 1      | 3.03  | 1 | 0.08174 |
| rs11826839   | 11 | 117790769 | G | A | -0.748 | 0.4542 | -? | 0      | 0     | 0 | 1       |
| rs2155808    | 11 | 120133107 | T | A | -0.748 | 0.4542 | -? | 0      | 0     | 0 | 1       |
| rs7939408    | 11 | 117845302 | T | A | 0.748  | 0.4542 | ++ | -197.4 | 1.009 | 1 | 0.3152  |
| rs7932658    | 11 | 120211212 | A | G | -0.748 | 0.4543 | -? | 0      | 0     | 0 | 1       |
| rs12804173   | 11 | 117465988 | A | T | -0.748 | 0.4546 | -- | 0      | 0.173 | 1 | 0.6775  |
| rs2508446    | 11 | 117873372 | A | G | 0.748  | 0.4546 | ++ | 0      | 0.014 | 1 | 0.9047  |
| rs748771     | 11 | 117615502 | G | A | 0.748  | 0.4546 | +  | 0      | 0     | 0 | 1       |
| rs11217841   | 11 | 120238721 | A | C | -0.748 | 0.4547 | -? | 0      | 0     | 0 | 1       |
| rs648384     | 11 | 117328700 | G | A | 0.747  | 0.455  | +  | 0      | 0     | 0 | 1       |
| rs80064625   | 11 | 119801612 | C | T | -0.747 | 0.455  | -? | 0      | 0     | 0 | 1       |
| rs12273996   | 11 | 117500940 | A | G | -0.747 | 0.4552 | -? | 0      | 0     | 0 | 1       |
| rs1145194    | 11 | 116570968 | A | C | 0.747  | 0.4553 | +  | 0      | 0     | 0 | 1       |
| rs73020495   | 11 | 117775943 | A | C | 0.747  | 0.4553 | +  | 0      | 0     | 0 | 1       |
| rs10790247   | 11 | 118113629 | T | G | -0.746 | 0.4554 | -? | 0      | 0     | 0 | 1       |
| rs12798851   | 11 | 118135973 | G | T | 0.746  | 0.4555 | +  | 17.9   | 3.655 | 1 | 0.05589 |
| rs1596979    | 11 | 119800142 | C | A | -0.746 | 0.4555 | -? | 0      | 0     | 0 | 1       |
| rs1892894    | 11 | 120254684 | T | C | -0.746 | 0.4556 | -? | 0      | 0     | 0 | 1       |
| rs680268     | 11 | 119239689 | C | T | 0.746  | 0.4557 | +  | 0      | 0     | 0 | 1       |
| rs4938799    | 11 | 120208257 | G | T | -0.746 | 0.4558 | -? | 0      | 0     | 0 | 1       |
| rs146786560  | 11 | 117106458 | C | T | -0.746 | 0.4559 | -? | 0      | 0     | 0 | 1       |
| rs2508950    | 11 | 118993549 | T | C | 0.745  | 0.4564 | +  | 0      | 0     | 0 | 1       |
| rs7939363    | 11 | 119225134 | T | C | 0.745  | 0.4564 | +  | 0      | 0     | 0 | 1       |
| rs61010648   | 11 | 118206890 | G | C | 0.745  | 0.4565 | +  | 0      | 0     | 0 | 1       |
| rs61906102   | 11 | 116546503 | C | T | -0.744 | 0.4566 | -? | 0      | 0     | 0 | 1       |
| rs12277914   | 11 | 117733223 | T | C | 0.744  | 0.4567 | +  | 0      | 0     | 0 | 1       |
| rs2034643    | 11 | 119935789 | T | G | -0.744 | 0.4567 | -? | 0      | 0     | 0 | 1       |
| rs553080     | 11 | 116702345 | C | T | -0.744 | 0.4567 | -? | 0      | 0     | 0 | 1       |
| rs10892045   | 11 | 116784824 | A | C | 0.744  | 0.457  | +  | 0      | 0     | 0 | 1       |
| rs4938756    | 11 | 119878269 | C | T | -0.744 | 0.457  | -? | 0      | 0     | 0 | 1       |
| rs2847494    | 11 | 120133012 | T | C | -0.744 | 0.4571 | -? | 0      | 0     | 0 | 1       |
| rs12099358   | 11 | 116726048 | A | C | 0.743  | 0.4572 | +  | 0      | 0     | 0 | 1       |
| rs148189915  | 11 | 120187422 | T | A | 0.743  | 0.4572 | +  | 0      | 0     | 0 | 1       |
| rs61906104   | 11 | 116550115 | G | A | -0.743 | 0.4572 | -? | 0      | 0     | 0 | 1       |
| rs9667927    | 11 | 120622625 | C | T | 0.743  | 0.4572 | +  | 0      | 0     | 0 | 1       |
| rs61686122   | 11 | 119016539 | C | G | -0.743 | 0.4573 | -? | 0      | 0     | 0 | 1       |
| rs1793145    | 11 | 118112433 | C | T | -0.743 | 0.4574 | -? | 0      | 0     | 0 | 1       |
| rs11216631   | 11 | 117795679 | T | G | 0.743  | 0.4576 | +  | 0      | 0     | 0 | 1       |
| rs12281564   | 11 | 119923231 | A | G | 0.743  | 0.4577 | +  | 0      | 0     | 0 | 1       |
| rs1406347456 | 11 | 117709645 | G | T | 0.742  | 0.4579 | +  | 0      | 0     | 0 | 1       |
| rs67145274   | 11 | 117136277 | G | C | -0.742 | 0.4579 | -? | 0      | 0     | 0 | 1       |
| rs11607146   | 11 | 119662084 | G | A | 0.742  | 0.4581 | ++ | 0      | 0.005 | 1 | 0.9461  |
| rs1893035    | 11 | 117596086 | A | G | 0.741  | 0.4585 | +  | 0      | 0     | 0 | 1       |
| rs76589374   | 11 | 117490095 | T | G | 0.741  | 0.4585 | +  | 0      | 0     | 0 | 1       |
| rs723937     | 11 | 120312746 | A | G | -0.74  | 0.4591 | -? | 0      | 0     | 0 | 1       |
| rs11820186   | 11 | 120632745 | A | G | 0.74   | 0.4594 | +  | 0      | 0     | 0 | 1       |
| rs2850805    | 11 | 120793387 | G | A | 0.74   | 0.4594 | +  | 0      | 0     | 0 | 1       |
| rs76248354   | 11 | 118042606 | A | G | 0.74   | 0.4594 | +- | 43.8   | 5.341 | 1 | 0.02083 |

|              |    |           |   |   |        |        |    |        |       |   |         |
|--------------|----|-----------|---|---|--------|--------|----|--------|-------|---|---------|
| rs10790430   | 11 | 121154837 | T | C | -0.74  | 0.4595 | -? | 0      | 0     | 0 | 1       |
| rs10790431   | 11 | 121155070 | C | T | -0.74  | 0.4595 | -? | 0      | 0     | 0 | 1       |
| rs12801136   | 11 | 116548349 | A | G | -0.74  | 0.4596 | -? | 0      | 0     | 0 | 1       |
| rs516169     | 11 | 116247262 | C | G | -0.739 | 0.4598 | -? | 0      | 0     | 0 | 1       |
| rs880745     | 11 | 119864575 | T | C | 0.739  | 0.4598 | +  | 0      | 0     | 0 | 1       |
| rs2853005    | 11 | 118120104 | C | T | -0.739 | 0.4599 | -? | 0      | 0     | 0 | 1       |
| rs56693116   | 11 | 120361394 | T | G | 0.739  | 0.4602 | +  | 0      | 0     | 0 | 1       |
| rs1551240    | 11 | 120087541 | T | C | 0.738  | 0.4605 | +  | 0      | 0     | 0 | 1       |
| rs11217840   | 11 | 120238655 | G | A | -0.738 | 0.4606 | -? | 0      | 0     | 0 | 1       |
| rs12804597   | 11 | 120391473 | A | G | 0.738  | 0.4606 | +  | 0      | 0     | 0 | 1       |
| rs7950969    | 11 | 117583898 | G | A | 0.738  | 0.4606 | +  | 0      | 0     | 0 | 1       |
| rs2846098    | 11 | 120650053 | C | T | 0.738  | 0.4607 | +  | 0      | 0     | 0 | 1       |
| rs4936388    | 11 | 117440404 | G | T | -0.738 | 0.4607 | -- | 0      | 0.157 | 1 | 0.6923  |
| rs10790239   | 11 | 118001445 | T | C | -0.737 | 0.461  | -- | 0      | 0.435 | 1 | 0.5096  |
| rs3759007    | 11 | 118137667 | T | C | 0.737  | 0.4612 | +  | 0      | 0     | 0 | 1       |
| rs4252248    | 11 | 117858983 | G | A | 0.737  | 0.4612 | ++ | 0      | 0.218 | 1 | 0.6408  |
| rs4938796    | 11 | 120184678 | A | G | 0.737  | 0.4613 | +  | 0      | 0     | 0 | 1       |
| rs1939979    | 11 | 117611162 | T | C | 0.737  | 0.4614 | +  | 0      | 0     | 0 | 1       |
| rs34180117   | 11 | 118138629 | T | C | 0.737  | 0.4614 | +  | 0      | 0     | 0 | 1       |
| rs35850218   | 11 | 118138922 | C | T | 0.737  | 0.4614 | +  | 0      | 0     | 0 | 1       |
| rs633223     | 11 | 119846524 | A | G | 0.736  | 0.4615 | +  | 0      | 0     | 0 | 1       |
| rs595049     | 11 | 116699445 | C | A | -0.736 | 0.4616 | -? | 0      | 0     | 0 | 1       |
| rs80125068   | 11 | 116996445 | G | A | 0.736  | 0.4617 | +  | 0      | 0     | 0 | 1       |
| rs145034678  | 11 | 120857142 | A | G | -0.735 | 0.4621 | -? | 0      | 0     | 0 | 1       |
| rs10892376   | 11 | 119370899 | A | C | -0.735 | 0.4622 | -? | 0      | 0     | 0 | 1       |
| rs11216832   | 11 | 118119073 | A | C | -0.735 | 0.4622 | -? | 0      | 0     | 0 | 1       |
| rs11216833   | 11 | 118119957 | T | G | -0.735 | 0.4622 | -? | 0      | 0     | 0 | 1       |
| rs76080778   | 11 | 119501013 | G | A | 0.735  | 0.4622 | +  | 0      | 0     | 0 | 1       |
| rs10892567   | 11 | 120244192 | G | A | -0.735 | 0.4623 | -? | 0      | 0     | 0 | 1       |
| rs6589829    | 11 | 120530973 | C | T | -0.735 | 0.4623 | -? | 0      | 0     | 0 | 1       |
| rs10790293   | 11 | 119304090 | A | C | 0.735  | 0.4624 | +- | -29.7  | 2.313 | 1 | 0.1283  |
| rs4456287    | 11 | 118298252 | C | T | 0.735  | 0.4624 | ++ | 0      | 0.003 | 1 | 0.9552  |
| rs11216126   | 11 | 116617240 | C | A | -0.735 | 0.4626 | +- | 0      | 0.524 | 1 | 0.469   |
| rs11216341   | 11 | 117134094 | T | C | -0.735 | 0.4626 | -? | 0      | 0     | 0 | 1       |
| rs117527146  | 11 | 118150882 | A | C | -0.735 | 0.4626 | -? | 0      | 0     | 0 | 1       |
| rs12295268   | 11 | 117133378 | A | G | -0.735 | 0.4626 | -? | 0      | 0     | 0 | 1       |
| rs5134       | 11 | 116702579 | C | T | -0.734 | 0.4627 | -? | 0      | 0     | 0 | 1       |
| rs35681250   | 11 | 116555386 | T | A | -0.734 | 0.4631 | -? | 0      | 0     | 0 | 1       |
| rs481473     | 11 | 116250624 | C | A | -0.734 | 0.4631 | -? | 0      | 0     | 0 | 1       |
| rs1481148807 | 11 | 116960078 | A | G | -0.733 | 0.4633 | +- | 45.2   | 5.478 | 1 | 0.01926 |
| rs10160827   | 11 | 117814506 | T | C | 0.733  | 0.4634 | ++ | -189.3 | 1.037 | 1 | 0.3085  |
| rs1573580    | 11 | 118069269 | G | C | 0.733  | 0.4634 | +  | 0      | 0     | 0 | 1       |
| rs56128937   | 11 | 118139478 | A | T | 0.733  | 0.4634 | +  | 0      | 0     | 0 | 1       |
| rs12284730   | 11 | 120560459 | T | C | 0.733  | 0.4635 | +  | 0      | 0     | 0 | 1       |
| rs1317514    | 11 | 120513914 | C | T | -0.733 | 0.4636 | -? | 0      | 0     | 0 | 1       |
| rs73008630   | 11 | 119697476 | G | A | -0.733 | 0.4636 | -? | 0      | 0     | 0 | 1       |
| rs12291550   | 11 | 116436362 | C | T | 0.733  | 0.4637 | ++ | 0      | 0.027 | 1 | 0.8694  |
| rs145749713  | 11 | 117488010 | A | G | 0.733  | 0.4637 | +  | 0      | 0     | 0 | 1       |
| rs3863317    | 11 | 117804109 | A | G | 0.733  | 0.4637 | +  | 0      | 0     | 0 | 1       |
| rs61734721   | 11 | 119692261 | C | T | -0.733 | 0.4637 | -? | 0      | 0     | 0 | 1       |
| rs3809046    | 11 | 119018766 | T | G | -0.733 | 0.4638 | -? | 0      | 0     | 0 | 1       |
| rs4936354    | 11 | 116398417 | T | G | -0.733 | 0.4638 | -? | 0      | 0     | 0 | 1       |
| rs55750089   | 11 | 119019152 | T | C | -0.733 | 0.4638 | -? | 0      | 0     | 0 | 1       |
| rs55752358   | 11 | 119019475 | T | A | -0.733 | 0.4638 | -? | 0      | 0     | 0 | 1       |
| rs56013883   | 11 | 119018774 | T | G | -0.733 | 0.4638 | -? | 0      | 0     | 0 | 1       |
| rs78951297   | 11 | 119714120 | A | G | 0.733  | 0.4638 | +  | 0      | 0     | 0 | 1       |

|             |    |           |   |   |        |        |   |       |       |   |         |
|-------------|----|-----------|---|---|--------|--------|---|-------|-------|---|---------|
| rs3759006   | 11 | 118137560 | A | G | 0.732  | 0.4639 | + | 0     | 0     | 0 | 1       |
| rs10892472  | 11 | 119683607 | A | C | 0.732  | 0.464  | + | 0     | 0     | 0 | 1       |
| rs17092638  | 11 | 116556236 | G | C | -0.732 | 0.464  | - | 0     | 0     | 0 | 1       |
| rs76610415  | 11 | 119900407 | A | G | -0.732 | 0.4641 | - | 0     | 0     | 0 | 1       |
| rs7948683   | 11 | 118137911 | A | G | 0.732  | 0.4641 | + | 0     | 0     | 0 | 1       |
| rs11601480  | 11 | 117430741 | C | A | -0.732 | 0.4643 | - | 0     | 0     | 0 | 1       |
| rs12270661  | 11 | 117140148 | A | G | -0.731 | 0.4645 | - | 0     | 0     | 0 | 1       |
| rs550893    | 11 | 117129617 | A | G | 0.731  | 0.4645 | + | 0     | 0     | 0 | 1       |
| rs56966127  | 11 | 120163449 | T | G | 0.731  | 0.4646 | + | 0     | 0     | 0 | 1       |
| rs11604424  | 11 | 116651115 | C | T | -0.731 | 0.4647 | + | 41.3  | 5.11  | 1 | 0.02379 |
| rs7937284   | 11 | 120731363 | G | A | -0.731 | 0.465  | - | 0     | 0     | 0 | 1       |
| rs10488782  | 11 | 117673828 | G | T | 0.73   | 0.4652 | + | 0     | 0.009 | 1 | 0.9224  |
| rs616889    | 11 | 119884781 | G | A | 0.73   | 0.4652 | + | 0     | 0     | 0 | 1       |
| rs35724134  | 11 | 116306907 | A | C | -0.73  | 0.4653 | - | 0     | 0     | 0 | 1       |
| rs4938358   | 11 | 117084091 | T | C | -0.73  | 0.4653 | - | 0     | 0     | 0 | 1       |
| rs4938652   | 11 | 119305593 | T | C | 0.73   | 0.4653 | + | -29.2 | 2.321 | 1 | 0.1276  |
| rs4938653   | 11 | 119305611 | C | T | 0.73   | 0.4653 | + | -29.2 | 2.321 | 1 | 0.1276  |
| rs6589811   | 11 | 120235703 | T | C | -0.73  | 0.4653 | - | 0     | 0     | 0 | 1       |
| rs57833493  | 11 | 120764256 | C | T | -0.73  | 0.4656 | - | 0     | 0     | 0 | 1       |
| rs191917960 | 11 | 119957452 | G | C | 0.729  | 0.4657 | + | 0     | 0     | 0 | 1       |
| rs145892119 | 11 | 119013740 | T | C | -0.729 | 0.4658 | - | 0     | 0     | 0 | 1       |
| rs1942929   | 11 | 117605098 | C | T | 0.729  | 0.4658 | + | 0     | 0     | 0 | 1       |
| rs1902627   | 11 | 117291975 | T | C | 0.729  | 0.4659 | + | 0     | 0     | 0 | 1       |
| rs7104866   | 11 | 116493328 | T | C | 0.729  | 0.466  | + | 0     | 0     | 0 | 1       |
| rs146990932 | 11 | 116392086 | T | C | 0.729  | 0.4661 | + | 0     | 0     | 0 | 1       |
| rs12806041  | 11 | 118138998 | G | A | 0.729  | 0.4662 | + | 0     | 0     | 0 | 1       |
| rs657317    | 11 | 119816766 | A | C | 0.729  | 0.4663 | + | 0     | 0     | 0 | 1       |
| rs6589831   | 11 | 120558738 | T | C | -0.728 | 0.4665 | - | 0     | 0     | 0 | 1       |
| rs7107783   | 11 | 116375253 | G | A | 0.728  | 0.4665 | + | 0     | 0     | 0 | 1       |
| rs8192613   | 11 | 118037813 | T | G | 0.728  | 0.4667 | + | 0     | 0     | 0 | 1       |
| rs115946185 | 11 | 117775361 | A | T | 0.728  | 0.4669 | + | 0     | 0     | 0 | 1       |
| rs79347839  | 11 | 117775374 | A | T | 0.728  | 0.4669 | + | 0     | 0     | 0 | 1       |
| rs482090    | 11 | 119695491 | T | C | -0.727 | 0.467  | - | 0     | 0     | 0 | 1       |
| rs10892566  | 11 | 120241923 | C | T | -0.727 | 0.4672 | - | 0     | 0     | 0 | 1       |
| rs74827927  | 11 | 120702968 | A | G | 0.727  | 0.4673 | + | 0     | 0     | 0 | 1       |
| rs11216617  | 11 | 117783176 | T | G | -0.726 | 0.4676 | - | 0     | 0     | 0 | 1       |
| rs1715437   | 11 | 118096891 | C | T | -0.726 | 0.4676 | - | 0     | 0     | 0 | 1       |
| rs7121779   | 11 | 120213360 | T | A | -0.726 | 0.4676 | - | 0     | 0     | 0 | 1       |
| rs11216137  | 11 | 116669828 | A | G | -0.726 | 0.4677 | + | 0     | 0.441 | 1 | 0.5069  |
| rs643423    | 11 | 119043656 | C | T | -0.726 | 0.4677 | - | 0     | 0     | 0 | 1       |
| rs665597    | 11 | 117900074 | A | G | 0.726  | 0.4677 | + | 0     | 0.684 | 1 | 0.4084  |
| rs58594771  | 11 | 120116018 | C | T | 0.726  | 0.468  | + | 0     | 0     | 0 | 1       |
| rs7342200   | 11 | 120726066 | A | G | 0.726  | 0.4681 | + | 0     | 0     | 0 | 1       |
| rs7952529   | 11 | 120216260 | C | A | -0.726 | 0.4681 | - | 0     | 0     | 0 | 1       |
| rs7342199   | 11 | 120726044 | A | G | 0.725  | 0.4683 | + | 0     | 0     | 0 | 1       |
| rs2512147   | 11 | 117872734 | T | C | 0.725  | 0.4684 | + | 0     | 0.015 | 1 | 0.9023  |
| rs681120    | 11 | 117173019 | C | A | -0.725 | 0.4686 | - | 0     | 0     | 0 | 1       |
| rs7350507   | 11 | 117321606 | G | A | 0.725  | 0.4686 | + | 0     | 0     | 0 | 1       |
| rs7924963   | 11 | 120233536 | A | G | -0.725 | 0.4687 | - | 0     | 0     | 0 | 1       |
| rs11218131  | 11 | 120928722 | A | G | -0.724 | 0.4688 | - | 0     | 0     | 0 | 1       |
| rs6589645   | 11 | 117971971 | G | A | -0.724 | 0.4688 | - | 0     | 0     | 0 | 1       |
| rs117587198 | 11 | 120879138 | A | T | -0.724 | 0.469  | - | 0     | 0     | 0 | 1       |
| rs145936741 | 11 | 116470289 | G | A | 0.724  | 0.469  | + | 0     | 0     | 0 | 1       |
| rs11218067  | 11 | 120815567 | A | G | -0.724 | 0.4692 | + | 0     | 0.617 | 1 | 0.432   |
| rs11216047  | 11 | 116493715 | G | A | -0.724 | 0.4693 | - | 0     | 0     | 0 | 1       |
| rs11216608  | 11 | 117764726 | G | A | 0.724  | 0.4693 | + | 0     | 0     | 0 | 1       |

|              |    |           |   |   |        |        |   |       |       |   |        |
|--------------|----|-----------|---|---|--------|--------|---|-------|-------|---|--------|
| rs12786734   | 11 | 120239610 | G | A | 0.723  | 0.4695 | + | 0     | 0     | 0 | 1      |
| rs4331110    | 11 | 120730669 | A | G | -0.723 | 0.4695 | - | 0     | 0     | 0 | 1      |
| rs7926317    | 11 | 120807747 | C | T | 0.723  | 0.4696 | + | 0     | 0     | 0 | 1      |
| rs12799299   | 11 | 120193956 | T | C | 0.723  | 0.4697 | + | 0     | 0     | 0 | 1      |
| rs11217250   | 11 | 119222337 | T | C | 0.723  | 0.4698 | + | 0     | 0     | 0 | 1      |
| rs2510902    | 11 | 118700218 | A | G | -0.723 | 0.4698 | - | 0     | 0.566 | 1 | 0.4517 |
| rs77245011   | 11 | 117902428 | C | A | 0.723  | 0.4698 | + | 0     | 0.081 | 1 | 0.7758 |
| rs10790404   | 11 | 120731903 | T | C | -0.722 | 0.47   | - | 0     | 0     | 0 | 1      |
| rs477408     | 11 | 117775056 | G | A | -0.722 | 0.4701 | - | 0     | 0     | 0 | 1      |
| rs73578569   | 11 | 120657978 | T | C | 0.722  | 0.4702 | + | 0     | 0     | 0 | 1      |
| rs2080586    | 11 | 116733316 | C | T | 0.722  | 0.4703 | + | 0     | 0     | 0 | 1      |
| rs3910017    | 11 | 119295082 | A | G | 0.722  | 0.4703 | - | -57.4 | 1.906 | 1 | 0.1674 |
| rs7929916    | 11 | 119874301 | A | G | -0.722 | 0.4704 | - | 0     | 0     | 0 | 1      |
| rs1480516974 | 11 | 117245988 | T | C | 0.722  | 0.4705 | + | 0     | 0     | 0 | 1      |
| rs34955847   | 11 | 119805189 | T | C | -0.722 | 0.4705 | - | 0     | 0     | 0 | 1      |
| rs657137     | 11 | 117441495 | T | C | -0.722 | 0.4705 | - | 0     | 0.028 | 1 | 0.8671 |
| rs879858     | 11 | 116573120 | A | G | -0.722 | 0.4705 | - | 0     | 0     | 0 | 1      |
| rs11217523   | 11 | 119691772 | G | A | -0.722 | 0.4706 | - | 0     | 0     | 0 | 1      |
| rs10790380   | 11 | 120233158 | A | G | -0.721 | 0.4708 | - | 0     | 0     | 0 | 1      |
| rs112045567  | 11 | 118804989 | G | A | 0.721  | 0.4709 | + | -66.4 | 1.803 | 1 | 0.1794 |
| rs475178     | 11 | 119818914 | G | A | 0.721  | 0.4711 | + | 0     | 0     | 0 | 1      |
| rs475867     | 11 | 119818937 | A | G | 0.721  | 0.4711 | + | 0     | 0     | 0 | 1      |
| rs554338     | 11 | 119817739 | C | T | 0.721  | 0.4711 | + | 0     | 0     | 0 | 1      |
| rs628244     | 11 | 119818657 | T | C | 0.721  | 0.4711 | + | 0     | 0     | 0 | 1      |
| rs550764     | 11 | 119817385 | A | T | 0.721  | 0.4712 | + | 0     | 0     | 0 | 1      |
| rs77262931   | 11 | 119968674 | A | G | -0.721 | 0.4712 | - | 0     | 0     | 0 | 1      |
| rs688803     | 11 | 117953050 | T | C | -0.72  | 0.4713 | - | 0     | 0     | 0 | 1      |
| rs1179920    | 11 | 118993632 | G | A | 0.72   | 0.4714 | + | 0     | 0     | 0 | 1      |
| rs3891896    | 11 | 117291936 | G | T | -0.72  | 0.4714 | - | 0     | 0     | 0 | 1      |
| rs1787712    | 11 | 116560738 | G | C | -0.72  | 0.4715 | - | 0     | 0     | 0 | 1      |
| rs12294065   | 11 | 116671540 | C | G | -0.72  | 0.4716 | - | 0     | 0.436 | 1 | 0.5092 |
| rs4938740    | 11 | 119794036 | A | G | -0.72  | 0.4716 | - | 0     | 0     | 0 | 1      |
| rs76861941   | 11 | 119728139 | G | A | -0.72  | 0.4716 | - | 0     | 0     | 0 | 1      |
| rs17120652   | 11 | 117235647 | T | C | 0.72   | 0.4717 | + | 0     | 0     | 0 | 1      |
| rs10892170   | 11 | 117633470 | G | A | -0.72  | 0.4718 | - | 0     | 0     | 0 | 1      |
| rs11216607   | 11 | 117764641 | A | G | 0.72   | 0.4718 | + | 0     | 0     | 0 | 1      |
| rs492517     | 11 | 116311642 | T | C | 0.72   | 0.4718 | + | 0     | 0     | 0 | 1      |
| rs1893907    | 11 | 120524884 | G | C | -0.719 | 0.4719 | - | 0     | 0     | 0 | 1      |
| rs4297478    | 11 | 120435854 | C | T | -0.719 | 0.4723 | - | 0     | 0     | 0 | 1      |
| rs2515796    | 11 | 117817358 | G | A | -0.718 | 0.4725 | - | 0     | 0     | 0 | 1      |
| rs3017229    | 11 | 116560967 | A | G | 0.718  | 0.4726 | + | 0     | 0     | 0 | 1      |
| rs76716142   | 11 | 120695126 | T | C | 0.718  | 0.4726 | + | 0     | 0     | 0 | 1      |
| rs10892553   | 11 | 120110775 | C | T | -0.718 | 0.4727 | - | 0     | 0     | 0 | 1      |
| rs7107211    | 11 | 120262922 | A | G | -0.718 | 0.473  | - | 0     | 0     | 0 | 1      |
| rs61903703   | 11 | 117169874 | A | G | -0.717 | 0.4731 | - | 0     | 0     | 0 | 1      |
| rs117666845  | 11 | 118143062 | A | T | 0.717  | 0.4733 | + | 0     | 0.123 | 1 | 0.7254 |
| rs2852213    | 11 | 120789293 | T | C | 0.717  | 0.4733 | + | 0     | 0     | 0 | 1      |
| rs35606865   | 11 | 116668843 | C | T | -0.717 | 0.4733 | - | 0     | 0.434 | 1 | 0.5102 |
| rs10892354   | 11 | 119238381 | T | C | 0.717  | 0.4734 | + | 0     | 0     | 0 | 1      |
| rs6589598    | 11 | 117002403 | A | G | 0.717  | 0.4735 | + | 0     | 0     | 0 | 1      |
| rs12803154   | 11 | 117466151 | T | C | -0.717 | 0.4736 | - | 0     | 0.158 | 1 | 0.6906 |
| rs1941409    | 11 | 120150500 | G | A | -0.717 | 0.4736 | - | 0     | 0     | 0 | 1      |
| rs35262372   | 11 | 118704751 | G | A | -0.717 | 0.4736 | - | 0     | 0.348 | 1 | 0.5552 |
| rs1793187    | 11 | 118091747 | C | G | -0.716 | 0.4737 | - | 0     | 0     | 0 | 1      |
| rs58073046   | 11 | 120248493 | G | A | -0.716 | 0.4738 | - | 0     | 0     | 0 | 1      |
| rs10790383   | 11 | 120344526 | T | C | -0.716 | 0.4739 | - | 0     | 0     | 0 | 1      |

|             |    |           |   |   |        |        |    |      |       |   |        |
|-------------|----|-----------|---|---|--------|--------|----|------|-------|---|--------|
| rs1793139   | 11 | 118106875 | G | A | -0.716 | 0.474  | -? | 0    | 0     | 0 | 1      |
| rs4936410   | 11 | 117785260 | C | T | 0.716  | 0.474  | +  | 0    | 0     | 0 | 1      |
| rs7126413   | 11 | 120207405 | G | A | -0.716 | 0.4742 | -? | 0    | 0     | 0 | 1      |
| rs10892372  | 11 | 119368006 | A | G | 0.715  | 0.4747 | +  | 0    | 0     | 0 | 1      |
| rs11217821  | 11 | 120202099 | C | T | -0.715 | 0.4747 | -? | 0    | 0     | 0 | 1      |
| rs4569018   | 11 | 120733632 | C | T | -0.715 | 0.4747 | -? | 0    | 0     | 0 | 1      |
| rs58111676  | 11 | 117122831 | G | C | -0.715 | 0.4749 | -? | 0    | 0     | 0 | 1      |
| rs78972478  | 11 | 116398667 | T | C | -0.715 | 0.4749 | -? | 0    | 0     | 0 | 1      |
| rs10502233  | 11 | 119893752 | C | G | -0.714 | 0.4751 | -? | 0    | 0     | 0 | 1      |
| rs948469    | 11 | 117972721 | A | C | -0.714 | 0.4754 | -? | 0    | 0     | 0 | 1      |
| rs1944504   | 11 | 119843219 | T | C | -0.714 | 0.4755 | -? | 0    | 0     | 0 | 1      |
| rs7944850   | 11 | 119842786 | A | G | -0.713 | 0.4758 | -? | 0    | 0     | 0 | 1      |
| rs141784177 | 11 | 120916015 | G | C | 0.713  | 0.4759 | +  | 0    | 0     | 0 | 1      |
| rs1902625   | 11 | 117291793 | C | T | 0.713  | 0.476  | +  | 0    | 0     | 0 | 1      |
| rs668213    | 11 | 117577674 | G | A | 0.713  | 0.476  | +  | 0    | 0     | 0 | 1      |
| rs686992    | 11 | 117775034 | C | T | -0.713 | 0.476  | -? | 0    | 0     | 0 | 1      |
| rs1124874   | 11 | 116518008 | A | G | -0.712 | 0.4764 | -? | 0    | 0     | 0 | 1      |
| rs12293222  | 11 | 116565309 | A | G | -0.712 | 0.4765 | -? | 0    | 0     | 0 | 1      |
| rs7123209   | 11 | 117988654 | C | G | -0.712 | 0.4765 | -- | 0    | 0.24  | 1 | 0.6239 |
| rs1715438   | 11 | 118098041 | A | G | -0.712 | 0.4766 | -? | 0    | 0     | 0 | 1      |
| rs4252267   | 11 | 117863292 | A | G | 0.712  | 0.4768 | ++ | 0    | 0.141 | 1 | 0.7069 |
| rs4252270   | 11 | 117863846 | T | C | 0.712  | 0.4768 | ++ | 0    | 0.141 | 1 | 0.7069 |
| rs55713240  | 11 | 119019282 | T | C | -0.711 | 0.4769 | -? | 0    | 0     | 0 | 1      |
| rs73010950  | 11 | 116220070 | A | G | -0.711 | 0.477  | -- | 0    | 0.078 | 1 | 0.7796 |
| rs79459688  | 11 | 117582709 | G | A | 0.711  | 0.477  | +  | 0    | 0     | 0 | 1      |
| rs529411    | 11 | 116311777 | C | T | 0.711  | 0.4771 | +  | 0    | 0     | 0 | 1      |
| rs7115177   | 11 | 117239173 | C | A | -0.711 | 0.4771 | -? | 0    | 0     | 0 | 1      |
| rs4936414   | 11 | 117853613 | C | T | 0.71   | 0.4776 | ++ | 0    | 0.173 | 1 | 0.6775 |
| rs184607052 | 11 | 117482186 | G | A | 0.71   | 0.4777 | +  | 0    | 0     | 0 | 1      |
| rs7127194   | 11 | 119875060 | A | T | -0.71  | 0.4777 | -? | 0    | 0     | 0 | 1      |
| rs61906492  | 11 | 117107978 | A | G | -0.709 | 0.4781 | -? | 0    | 0     | 0 | 1      |
| rs10892582  | 11 | 120347715 | T | C | -0.709 | 0.4785 | -? | 0    | 0     | 0 | 1      |
| rs529796    | 11 | 117331864 | A | G | -0.709 | 0.4785 | -? | 0    | 0     | 0 | 1      |
| rs61905271  | 11 | 117312865 | A | G | -0.709 | 0.4785 | -? | 0    | 0     | 0 | 1      |
| rs74761525  | 11 | 117225982 | T | C | 0.709  | 0.4785 | +  | 0    | 0     | 0 | 1      |
| rs6589810   | 11 | 120233908 | A | G | -0.709 | 0.4786 | -? | 0    | 0     | 0 | 1      |
| rs715849    | 11 | 119575724 | A | G | -0.709 | 0.4786 | -? | 0    | 0     | 0 | 1      |
| rs7924772   | 11 | 120233626 | G | A | -0.709 | 0.4786 | -? | 0    | 0     | 0 | 1      |
| rs11216618  | 11 | 117784714 | C | T | -0.708 | 0.4787 | -? | 0    | 0     | 0 | 1      |
| rs486896    | 11 | 117173468 | A | G | 0.708  | 0.4788 | +  | 0    | 0     | 0 | 1      |
| rs76844341  | 11 | 116789849 | G | A | 0.708  | 0.4789 | +  | 0    | 0     | 0 | 1      |
| rs1944503   | 11 | 119813552 | A | G | -0.708 | 0.4791 | -? | 0    | 0     | 0 | 1      |
| rs7118391   | 11 | 120270709 | T | C | -0.707 | 0.4793 | -? | 0    | 0     | 0 | 1      |
| rs2277289   | 11 | 118182660 | C | T | -0.707 | 0.4795 | +  | -6.8 | 2.81  | 1 | 0.0937 |
| rs7117321   | 11 | 120239051 | C | T | -0.707 | 0.4795 | -? | 0    | 0     | 0 | 1      |
| rs12288729  | 11 | 116463208 | C | G | 0.707  | 0.4796 | +  | 0    | 0     | 0 | 1      |
| rs117092333 | 11 | 120302456 | A | G | 0.707  | 0.4797 | +  | 0    | 0     | 0 | 1      |
| rs1793186   | 11 | 118091089 | T | C | -0.707 | 0.4798 | -? | 0    | 0     | 0 | 1      |
| rs11216399  | 11 | 117323389 | A | C | -0.706 | 0.4799 | -? | 0    | 0     | 0 | 1      |
| rs4938804   | 11 | 120273865 | A | G | -0.706 | 0.4801 | -? | 0    | 0     | 0 | 1      |
| rs559545    | 11 | 117763868 | A | C | -0.706 | 0.4801 | -? | 0    | 0     | 0 | 1      |
| rs2077276   | 11 | 117700410 | A | C | 0.706  | 0.4802 | +  | 0    | 0     | 0 | 1      |
| rs59627935  | 11 | 119307070 | C | T | -0.706 | 0.4802 | -? | 0    | 0     | 0 | 1      |
| rs117607796 | 11 | 116565603 | A | C | -0.705 | 0.4808 | -- | 0    | 0.008 | 1 | 0.9268 |
| rs7103544   | 11 | 118994516 | G | A | 0.705  | 0.4809 | +  | 0    | 0     | 0 | 1      |
| rs10892193  | 11 | 117791979 | T | C | -0.705 | 0.4811 | -? | 0    | 0     | 0 | 1      |

|             |    |           |   |   |        |        |    |        |       |   |         |
|-------------|----|-----------|---|---|--------|--------|----|--------|-------|---|---------|
| rs118125468 | 11 | 120117394 | A | G | -0.705 | 0.4811 | -? | 0      | 0     | 0 | 1       |
| rs638270    | 11 | 117151378 | G | C | 0.704  | 0.4812 | +? | 0      | 0     | 0 | 1       |
| rs61898351  | 11 | 120199924 | C | T | -0.704 | 0.4813 | -? | 0      | 0     | 0 | 1       |
| rs75436216  | 11 | 119756962 | C | T | 0.704  | 0.4813 | +? | 0      | 0     | 0 | 1       |
| rs76467987  | 11 | 117390488 | C | T | 0.704  | 0.4813 | +? | 0      | 0     | 0 | 1       |
| rs1939984   | 11 | 117604158 | T | A | 0.704  | 0.4814 | +? | 0      | 0     | 0 | 1       |
| rs11216855  | 11 | 118208750 | C | T | -0.704 | 0.4815 | -- | 0      | 0.392 | 1 | 0.5313  |
| rs4354701   | 11 | 119488812 | A | G | -0.704 | 0.4816 | -? | 0      | 0     | 0 | 1       |
| rs1793162   | 11 | 118103972 | A | C | -0.703 | 0.4818 | -? | 0      | 0     | 0 | 1       |
| rs7104639   | 11 | 120239456 | G | C | -0.703 | 0.4819 | -? | 0      | 0     | 0 | 1       |
| rs1787702   | 11 | 116562288 | A | G | -0.703 | 0.4821 | -? | 0      | 0     | 0 | 1       |
| rs500943    | 11 | 116312643 | T | C | 0.702  | 0.4824 | +? | 0      | 0     | 0 | 1       |
| rs7129197   | 11 | 121107345 | T | G | 0.702  | 0.4824 | +? | 0      | 0     | 0 | 1       |
| rs4539328   | 11 | 120218243 | C | T | -0.702 | 0.4825 | -? | 0      | 0     | 0 | 1       |
| rs2370113   | 11 | 121192287 | T | G | -0.702 | 0.4826 | -? | 0      | 0     | 0 | 1       |
| rs28989504  | 11 | 117162762 | C | T | -0.701 | 0.4832 | -? | 0      | 0     | 0 | 1       |
| rs566174    | 11 | 116250106 | C | G | -0.701 | 0.4832 | -? | 0      | 0     | 0 | 1       |
| rs78058743  | 11 | 119577677 | T | C | -0.701 | 0.4832 | -? | 0      | 0     | 0 | 1       |
| rs2096882   | 11 | 120137465 | T | G | -0.701 | 0.4833 | -? | 0      | 0     | 0 | 1       |
| rs10750169  | 11 | 120136108 | C | G | -0.701 | 0.4834 | -? | 0      | 0     | 0 | 1       |
| rs56933877  | 11 | 118804643 | A | G | 0.701  | 0.4834 | +- | -62.5  | 1.846 | 1 | 0.1742  |
| rs617711    | 11 | 119366595 | T | C | 0.701  | 0.4834 | +? | 0      | 0     | 0 | 1       |
| rs10892562  | 11 | 120221618 | G | A | -0.701 | 0.4835 | -? | 0      | 0     | 0 | 1       |
| rs721487    | 11 | 117557886 | T | G | 0.701  | 0.4835 | +? | 0      | 0     | 0 | 1       |
| rs180349    | 11 | 116611827 | A | T | -0.7   | 0.4836 | +- | 0      | 0.552 | 1 | 0.4575  |
| rs948381    | 11 | 121111458 | C | A | 0.701  | 0.4836 | +? | 0      | 0     | 0 | 1       |
| rs2515794   | 11 | 117816152 | C | A | -0.7   | 0.4837 | -? | 0      | 0     | 0 | 1       |
| rs12280992  | 11 | 119692457 | T | C | -0.7   | 0.4838 | -? | 0      | 0     | 0 | 1       |
| rs7119384   | 11 | 118994357 | T | A | 0.7    | 0.4839 | +? | 0      | 0     | 0 | 1       |
| rs80079694  | 11 | 119975192 | A | G | -0.7   | 0.4839 | -? | 0      | 0     | 0 | 1       |
| rs10892307  | 11 | 118754649 | G | C | 0.7    | 0.4842 | +- | 33.1   | 4.482 | 1 | 0.03425 |
| rs656924    | 11 | 119364461 | T | G | 0.7    | 0.4842 | +? | 0      | 0     | 0 | 1       |
| rs6589812   | 11 | 120278359 | C | T | -0.699 | 0.4843 | -? | 0      | 0     | 0 | 1       |
| rs7937612   | 11 | 120278688 | C | T | -0.699 | 0.4843 | -? | 0      | 0     | 0 | 1       |
| rs1793166   | 11 | 118116052 | A | G | 0.699  | 0.4844 | +? | 0      | 0     | 0 | 1       |
| rs2212428   | 11 | 116516587 | T | C | -0.699 | 0.4845 | -? | 0      | 0     | 0 | 1       |
| rs7940051   | 11 | 120690057 | A | G | 0.699  | 0.4845 | +? | 0      | 0     | 0 | 1       |
| rs7937697   | 11 | 120731470 | A | G | -0.699 | 0.4846 | -? | 0      | 0     | 0 | 1       |
| rs4938361   | 11 | 117099941 | C | G | 0.699  | 0.4847 | +? | 0      | 0     | 0 | 1       |
| rs79770434  | 11 | 116523165 | T | C | -0.699 | 0.4847 | -? | 0      | 0     | 0 | 1       |
| rs12366157  | 11 | 120029638 | G | A | -0.699 | 0.4848 | -? | 0      | 0     | 0 | 1       |
| rs2231445   | 11 | 118184271 | C | T | 0.699  | 0.4848 | +- | 25.6   | 4.034 | 1 | 0.04458 |
| rs2306473   | 11 | 117097952 | T | C | 0.699  | 0.4848 | +? | 0      | 0     | 0 | 1       |
| rs7928238   | 11 | 119490180 | G | A | -0.699 | 0.4848 | -? | 0      | 0     | 0 | 1       |
| rs10736497  | 11 | 119309664 | C | T | 0.698  | 0.4849 | +- | -54.4  | 1.944 | 1 | 0.1633  |
| rs56326825  | 11 | 120690372 | C | T | 0.698  | 0.485  | +? | 0      | 0     | 0 | 1       |
| rs1558860   | 11 | 116607368 | A | C | -0.698 | 0.4851 | -- | -135.6 | 1.273 | 1 | 0.2591  |
| rs1974718   | 11 | 116606766 | G | A | -0.698 | 0.4851 | -- | -135.6 | 1.273 | 1 | 0.2591  |
| rs2229113   | 11 | 117869670 | A | G | 0.698  | 0.4851 | ++ | 0      | 0.067 | 1 | 0.7954  |
| rs521556    | 11 | 120036997 | T | C | 0.698  | 0.4851 | +? | 0      | 0     | 0 | 1       |
| rs34298380  | 11 | 120203559 | G | A | -0.698 | 0.4852 | -? | 0      | 0     | 0 | 1       |
| rs2100358   | 11 | 119939519 | A | C | -0.698 | 0.4853 | -? | 0      | 0     | 0 | 1       |
| rs608365    | 11 | 117951521 | C | G | -0.698 | 0.4853 | -? | 0      | 0     | 0 | 1       |
| rs3018382   | 11 | 118069563 | G | C | 0.697  | 0.4855 | +? | 0      | 0     | 0 | 1       |
| rs7122785   | 11 | 119222706 | G | A | 0.697  | 0.4855 | +? | 0      | 0     | 0 | 1       |
| rs906830    | 11 | 119549825 | T | C | 0.697  | 0.4855 | +? | 0      | 0     | 0 | 1       |

|              |    |           |   |   |        |        |    |       |       |   |        |
|--------------|----|-----------|---|---|--------|--------|----|-------|-------|---|--------|
| rs76273814   | 11 | 120489650 | T | C | -0.697 | 0.4856 | -? | 0     | 0     | 0 | 1      |
| rs11216430   | 11 | 117376111 | C | A | 0.697  | 0.4857 | +  | 0     | 0     | 0 | 1      |
| rs45535039   | 11 | 119060963 | C | T | 0.697  | 0.4857 | +  | 0     | 0     | 0 | 1      |
| rs4938752    | 11 | 119877101 | G | C | -0.697 | 0.4857 | -? | 0     | 0     | 0 | 1      |
| rs10790378   | 11 | 120220268 | C | T | -0.697 | 0.4858 | -? | 0     | 0     | 0 | 1      |
| rs10790426   | 11 | 121139566 | C | T | -0.697 | 0.4858 | -- | 0     | 0.58  | 1 | 0.4462 |
| rs4938801    | 11 | 120223399 | T | C | -0.697 | 0.4858 | -? | 0     | 0     | 0 | 1      |
| rs7107144    | 11 | 119854514 | C | T | -0.697 | 0.486  | -? | 0     | 0     | 0 | 1      |
| rs76344204   | 11 | 121132474 | A | G | 0.697  | 0.486  | +  | 0     | 0     | 0 | 1      |
| rs10790372   | 11 | 120136078 | T | G | -0.696 | 0.4862 | -? | 0     | 0     | 0 | 1      |
| rs521053     | 11 | 119362151 | T | C | 0.696  | 0.4867 | +  | 0     | 0     | 0 | 1      |
| rs10892591   | 11 | 120521766 | T | C | -0.695 | 0.4871 | -? | 0     | 0     | 0 | 1      |
| rs78503991   | 11 | 117481112 | T | A | 0.695  | 0.4871 | +  | 0     | 0     | 0 | 1      |
| rs948026     | 11 | 120683594 | A | G | 0.695  | 0.4871 | +  | 0     | 0     | 0 | 1      |
| rs117010140  | 11 | 117773027 | A | G | -0.695 | 0.4873 | -? | 0     | 0     | 0 | 1      |
| rs3802871    | 11 | 117776648 | C | A | -0.695 | 0.4873 | -? | 0     | 0     | 0 | 1      |
| rs7940347    | 11 | 120690291 | T | G | 0.695  | 0.4873 | +  | 0     | 0     | 0 | 1      |
| rs7101415    | 11 | 120239088 | A | G | -0.694 | 0.4874 | -? | 0     | 0     | 0 | 1      |
| rs76169968   | 11 | 117082966 | A | G | -0.694 | 0.4875 | -? | 0     | 0     | 0 | 1      |
| rs17075      | 11 | 118959331 | G | A | 0.694  | 0.4876 | +  | 0     | 0     | 0 | 1      |
| rs61897696   | 11 | 119642855 | A | G | -0.694 | 0.4877 | -? | 0     | 0     | 0 | 1      |
| rs654946     | 11 | 117456034 | A | G | 0.694  | 0.4877 | +  | 0     | 0     | 0 | 1      |
| rs4482041    | 11 | 119875343 | T | C | -0.694 | 0.4878 | -? | 0     | 0     | 0 | 1      |
| rs61897867   | 11 | 119842049 | T | C | -0.694 | 0.4878 | -? | 0     | 0     | 0 | 1      |
| rs7928100    | 11 | 119377274 | A | G | -0.693 | 0.488  | -? | 0     | 0     | 0 | 1      |
| rs12806740   | 11 | 120203628 | A | G | -0.693 | 0.4882 | -? | 0     | 0     | 0 | 1      |
| rs138526953  | 11 | 118793479 | A | C | -0.693 | 0.4882 | -- | 0     | 0.107 | 1 | 0.7435 |
| rs1793163    | 11 | 118114813 | T | C | -0.693 | 0.4883 | -? | 0     | 0     | 0 | 1      |
| rs1793164    | 11 | 118114853 | T | A | -0.693 | 0.4883 | -? | 0     | 0     | 0 | 1      |
| rs2853033    | 11 | 118114344 | A | G | -0.693 | 0.4884 | -? | 0     | 0     | 0 | 1      |
| rs618627     | 11 | 119366779 | C | T | 0.693  | 0.4884 | +  | 0     | 0     | 0 | 1      |
| rs7112876    | 11 | 116363370 | C | G | -0.693 | 0.4884 | -? | 0     | 0     | 0 | 1      |
| rs1371711774 | 11 | 116368043 | T | C | 0.693  | 0.4886 | +  | 0     | 0     | 0 | 1      |
| rs668678     | 11 | 119364555 | A | G | 0.692  | 0.4888 | +  | 0     | 0     | 0 | 1      |
| rs4499013    | 11 | 119488646 | C | T | -0.692 | 0.4889 | -? | 0     | 0     | 0 | 1      |
| rs644920     | 11 | 117898231 | A | T | 0.691  | 0.4893 | +- | 0     | 0.363 | 1 | 0.5466 |
| rs73575441   | 11 | 118804919 | C | T | 0.691  | 0.4894 | +- | -63.8 | 1.832 | 1 | 0.1759 |
| rs77004360   | 11 | 120687126 | T | C | 0.691  | 0.4894 | +  | 0     | 0     | 0 | 1      |
| rs1787698    | 11 | 116564562 | T | C | 0.691  | 0.4896 | +  | 0     | 0     | 0 | 1      |
| rs1787699    | 11 | 116564553 | G | A | 0.691  | 0.4896 | +  | 0     | 0     | 0 | 1      |
| rs7939137    | 11 | 120343271 | T | C | -0.691 | 0.4896 | -? | 0     | 0     | 0 | 1      |
| rs7945424    | 11 | 119569802 | G | T | -0.691 | 0.4897 | -? | 0     | 0     | 0 | 1      |
| rs11218201   | 11 | 121086234 | C | T | -0.69  | 0.4899 | -? | 0     | 0     | 0 | 1      |
| rs12421432   | 11 | 119603847 | T | C | -0.69  | 0.49   | -? | 0     | 0     | 0 | 1      |
| rs678202     | 11 | 117899573 | G | A | 0.69   | 0.49   | +- | 0     | 0.449 | 1 | 0.503  |
| rs1047417    | 11 | 119172536 | G | A | 0.69   | 0.4901 | ++ | 0     | 0.299 | 1 | 0.5847 |
| rs4570590    | 11 | 120523139 | C | G | -0.69  | 0.4901 | -? | 0     | 0     | 0 | 1      |
| rs7950743    | 11 | 117613781 | A | G | 0.69   | 0.4902 | +  | 0     | 0     | 0 | 1      |
| rs1787703    | 11 | 116562266 | T | C | -0.69  | 0.4903 | -? | 0     | 0     | 0 | 1      |
| rs4938755    | 11 | 119878219 | G | A | -0.69  | 0.4903 | -? | 0     | 0     | 0 | 1      |
| rs556727     | 11 | 116250285 | G | A | -0.69  | 0.4903 | -? | 0     | 0     | 0 | 1      |
| rs10892511   | 11 | 119875093 | T | C | -0.69  | 0.4904 | -? | 0     | 0     | 0 | 1      |
| rs11827828   | 11 | 116755584 | A | G | 0.689  | 0.4906 | +  | 0     | 0     | 0 | 1      |
| rs2004507    | 11 | 117700725 | G | T | 0.689  | 0.4907 | +  | 0     | 0     | 0 | 1      |
| rs1533051    | 11 | 119551498 | T | C | 0.688  | 0.4912 | +  | 0     | 0     | 0 | 1      |
| rs1960036    | 11 | 116547409 | A | C | -0.688 | 0.4912 | -? | 0     | 0     | 0 | 1      |

|             |    |           |   |   |        |        |    |       |       |   |        |
|-------------|----|-----------|---|---|--------|--------|----|-------|-------|---|--------|
| rs3018368   | 11 | 118113907 | G | C | -0.688 | 0.4912 | -? | 0     | 0     | 0 | 1      |
| rs11217176  | 11 | 119065044 | A | G | 0.688  | 0.4913 | +  | 0     | 0     | 0 | 1      |
| rs78390305  | 11 | 120702933 | A | G | 0.688  | 0.4913 | +  | 0     | 0     | 0 | 1      |
| rs12295634  | 11 | 118054431 | T | C | 0.688  | 0.4916 | ++ | 0     | 0.137 | 1 | 0.7117 |
| rs61898297  | 11 | 120109766 | T | C | 0.688  | 0.4916 | +  | 0     | 0     | 0 | 1      |
| rs12799449  | 11 | 116558525 | G | A | -0.688 | 0.4917 | -? | 0     | 0     | 0 | 1      |
| rs117758225 | 11 | 120165444 | T | C | -0.688 | 0.4918 | -- | 0     | 0.061 | 1 | 0.8048 |
| rs1793140   | 11 | 118107805 | A | G | -0.687 | 0.4919 | -? | 0     | 0     | 0 | 1      |
| rs4938450   | 11 | 117760117 | T | C | 0.687  | 0.492  | +  | 0     | 0     | 0 | 1      |
| rs482002    | 11 | 119330588 | T | A | 0.687  | 0.4922 | +  | -52.9 | 1.962 | 1 | 0.1613 |
| rs59346420  | 11 | 117388656 | T | C | 0.687  | 0.4922 | +  | 0     | 0     | 0 | 1      |
| rs1790047   | 11 | 116251739 | C | T | -0.686 | 0.4924 | -? | 0     | 0     | 0 | 1      |
| rs603075    | 11 | 119365632 | C | G | 0.686  | 0.4924 | +  | 0     | 0     | 0 | 1      |
| rs689580    | 11 | 119365287 | A | G | 0.686  | 0.4924 | +  | 0     | 0     | 0 | 1      |
| rs76124005  | 11 | 116575614 | G | T | -0.687 | 0.4924 | -- | 0     | 0.003 | 1 | 0.9534 |
| rs11217803  | 11 | 120167566 | A | C | -0.686 | 0.4926 | -- | 0     | 0.013 | 1 | 0.909  |
| rs549893    | 11 | 118959732 | C | T | 0.686  | 0.4926 | +  | 0     | 0     | 0 | 1      |
| rs111551597 | 11 | 116375518 | T | C | 0.686  | 0.4927 | +  | 0     | 0     | 0 | 1      |
| rs12361680  | 11 | 119489210 | C | G | -0.686 | 0.4927 | -? | 0     | 0     | 0 | 1      |
| rs4936568   | 11 | 120825575 | A | G | 0.686  | 0.4927 | +  | 0     | 0     | 0 | 1      |
| rs116892227 | 11 | 116512747 | A | G | -0.686 | 0.493  | -? | 0     | 0     | 0 | 1      |
| rs7914      | 11 | 119180316 | A | G | -0.686 | 0.493  | -? | 0     | 0     | 0 | 1      |
| rs7931206   | 11 | 118056092 | C | T | 0.685  | 0.4932 | ++ | 0     | 0.079 | 1 | 0.7785 |
| rs7944087   | 11 | 118055733 | T | C | 0.685  | 0.4932 | ++ | 0     | 0.079 | 1 | 0.7785 |
| rs3782041   | 11 | 118184092 | T | C | 0.685  | 0.4933 | +  | 0     | 0     | 0 | 1      |
| rs12799766  | 11 | 116558427 | A | G | -0.685 | 0.4935 | -? | 0     | 0     | 0 | 1      |
| rs3759003   | 11 | 118136745 | G | T | 0.685  | 0.4936 | +  | 0     | 0     | 0 | 1      |
| rs117742492 | 11 | 116523657 | A | G | -0.684 | 0.4938 | -? | 0     | 0     | 0 | 1      |
| rs583713    | 11 | 118992177 | T | C | 0.684  | 0.4938 | +  | 0     | 0     | 0 | 1      |
| rs10892434  | 11 | 119573389 | T | C | -0.684 | 0.4941 | -? | 0     | 0     | 0 | 1      |
| rs2511841   | 11 | 119206375 | G | A | -0.684 | 0.4941 | -? | 0     | 0     | 0 | 1      |
| rs10750097  | 11 | 116664040 | G | A | -0.684 | 0.4942 | +- | -35.5 | 2.214 | 1 | 0.1368 |
| rs2512158   | 11 | 117823425 | A | G | 0.684  | 0.4942 | ++ | 0     | 0.019 | 1 | 0.8907 |
| rs6589650   | 11 | 118055217 | C | T | 0.684  | 0.4942 | ++ | 0     | 0.078 | 1 | 0.7805 |
| rs7940757   | 11 | 118055273 | T | C | 0.684  | 0.4942 | ++ | 0     | 0.078 | 1 | 0.7805 |
| rs75235704  | 11 | 117199742 | G | T | -0.683 | 0.4943 | -? | 0     | 0     | 0 | 1      |
| rs10892348  | 11 | 119194035 | T | C | -0.683 | 0.4944 | -? | 0     | 0     | 0 | 1      |
| rs35503012  | 11 | 119811841 | G | A | -0.683 | 0.4944 | -? | 0     | 0     | 0 | 1      |
| rs12222464  | 11 | 119224773 | C | T | 0.683  | 0.4945 | +  | 0     | 0     | 0 | 1      |
| rs1893392   | 11 | 119936695 | T | C | -0.683 | 0.4945 | -? | 0     | 0     | 0 | 1      |
| rs512168    | 11 | 116268668 | A | T | 0.683  | 0.4946 | +  | 0     | 0     | 0 | 1      |
| rs61906115  | 11 | 116558245 | A | T | -0.683 | 0.4947 | -? | 0     | 0     | 0 | 1      |
| rs7947338   | 11 | 117613203 | C | T | 0.683  | 0.4948 | +  | 0     | 0     | 0 | 1      |
| rs3809042   | 11 | 117749120 | G | C | -0.682 | 0.4951 | -? | 0     | 0     | 0 | 1      |
| rs582146    | 11 | 117952771 | T | G | -0.682 | 0.4951 | -? | 0     | 0     | 0 | 1      |
| rs10892108  | 11 | 117320727 | T | C | -0.682 | 0.4952 | -? | 0     | 0     | 0 | 1      |
| rs138877884 | 11 | 117135014 | A | G | -0.682 | 0.4952 | -? | 0     | 0     | 0 | 1      |
| rs12417581  | 11 | 120216906 | A | T | -0.682 | 0.4953 | -? | 0     | 0     | 0 | 1      |
| rs10892592  | 11 | 120522003 | T | C | -0.681 | 0.4956 | -? | 0     | 0     | 0 | 1      |
| rs4938362   | 11 | 117100029 | A | G | 0.681  | 0.4957 | +  | 0     | 0     | 0 | 1      |
| rs78443404  | 11 | 119935473 | C | G | 0.681  | 0.4957 | +  | 0     | 0     | 0 | 1      |
| rs11216180  | 11 | 116773378 | T | A | 0.681  | 0.4958 | +  | 0     | 0     | 0 | 1      |
| rs1715418   | 11 | 118112841 | T | A | -0.681 | 0.4958 | -? | 0     | 0     | 0 | 1      |
| rs628721    | 11 | 120987937 | G | A | -0.681 | 0.4958 | -- | 0     | 0.268 | 1 | 0.6046 |
| rs12419440  | 11 | 117318324 | C | T | 0.681  | 0.4959 | +  | 0     | 0     | 0 | 1      |
| rs2368940   | 11 | 120070770 | A | G | -0.681 | 0.4959 | -? | 0     | 0     | 0 | 1      |

|             |    |           |   |   |        |        |    |       |       |   |         |
|-------------|----|-----------|---|---|--------|--------|----|-------|-------|---|---------|
| rs546734014 | 11 | 116762829 | A | G | 0.681  | 0.496  | +  | 0     | 0     | 0 | 1       |
| rs34236286  | 11 | 117642289 | C | T | 0.681  | 0.4961 | +  | 0     | 0     | 0 | 1       |
| rs518326    | 11 | 119710918 | A | T | 0.681  | 0.4961 | +  | 0     | 0     | 0 | 1       |
| rs12274740  | 11 | 118054128 | C | T | 0.68   | 0.4963 | ++ | 0     | 0.14  | 1 | 0.7085  |
| rs3759005   | 11 | 118136871 | G | A | 0.68   | 0.4963 | +  | 0     | 0     | 0 | 1       |
| rs78144220  | 11 | 117466755 | T | G | 0.68   | 0.4963 | +  | 0     | 0     | 0 | 1       |
| rs10790332  | 11 | 119553678 | T | C | 0.68   | 0.4966 | +  | 0     | 0     | 0 | 1       |
| rs3751026   | 11 | 119291688 | A | G | 0.68   | 0.4967 | -+ | -46.2 | 2.052 | 1 | 0.152   |
| rs4148167   | 11 | 119024931 | G | A | -0.68  | 0.4967 | -? | 0     | 0     | 0 | 1       |
| rs73000741  | 11 | 119935372 | A | G | -0.68  | 0.4967 | -? | 0     | 0     | 0 | 1       |
| rs73012959  | 11 | 116489644 | T | C | 0.68   | 0.4968 | +  | 0     | 0     | 0 | 1       |
| rs17123753  | 11 | 120131001 | G | C | -0.679 | 0.4969 | -? | 0     | 0     | 0 | 1       |
| rs117338034 | 11 | 116518743 | G | T | -0.679 | 0.497  | -? | 0     | 0     | 0 | 1       |
| rs74939223  | 11 | 116575880 | G | A | -0.679 | 0.497  | -- | 0     | 0.003 | 1 | 0.9568  |
| rs620566    | 11 | 119367238 | A | C | 0.679  | 0.4973 | +  | 0     | 0     | 0 | 1       |
| rs4938276   | 11 | 116393980 | T | C | -0.679 | 0.4974 | -? | 0     | 0     | 0 | 1       |
| rs77944184  | 11 | 117388657 | A | G | 0.679  | 0.4974 | +  | 0     | 0     | 0 | 1       |
| rs7944321   | 11 | 118055801 | A | G | 0.679  | 0.4974 | ++ | 0     | 0.077 | 1 | 0.7813  |
| rs7944366   | 11 | 118056047 | G | A | 0.679  | 0.4974 | ++ | 0     | 0.077 | 1 | 0.7813  |
| rs11822437  | 11 | 120637669 | A | T | 0.678  | 0.4975 | +  | 0     | 0     | 0 | 1       |
| rs4936517   | 11 | 120228286 | G | C | -0.678 | 0.4975 | -? | 0     | 0     | 0 | 1       |
| rs1145206   | 11 | 116718521 | C | G | 0.678  | 0.4978 | +  | 0     | 0     | 0 | 1       |
| rs1942925   | 11 | 117599235 | G | A | 0.678  | 0.4978 | +  | 0     | 0     | 0 | 1       |
| rs1942927   | 11 | 117599647 | G | A | 0.678  | 0.4978 | +  | 0     | 0     | 0 | 1       |
| rs948103    | 11 | 117597375 | C | A | 0.678  | 0.4978 | +  | 0     | 0     | 0 | 1       |
| rs533636    | 11 | 120036267 | A | G | 0.678  | 0.4979 | +  | 0     | 0     | 0 | 1       |
| rs11602075  | 11 | 120448992 | C | T | -0.677 | 0.4981 | -? | 0     | 0     | 0 | 1       |
| rs12293635  | 11 | 116305930 | C | G | 0.677  | 0.4981 | +  | 0     | 0     | 0 | 1       |
| rs4938503   | 11 | 118180155 | C | G | -0.677 | 0.4982 | -+ | -1.4  | 2.959 | 1 | 0.08541 |
| rs535860    | 11 | 117159878 | T | A | 0.677  | 0.4982 | +  | 0     | 0     | 0 | 1       |
| rs10892590  | 11 | 120515734 | G | A | -0.677 | 0.4983 | -? | 0     | 0     | 0 | 1       |
| rs4018665   | 11 | 119282086 | T | C | 0.677  | 0.4985 | -+ | -66.5 | 1.802 | 1 | 0.1795  |
| rs10892181  | 11 | 117699586 | G | T | 0.677  | 0.4987 | +  | 0     | 0     | 0 | 1       |
| rs12291852  | 11 | 120694915 | T | G | 0.676  | 0.4988 | +  | 0     | 0     | 0 | 1       |
| rs73575454  | 11 | 118807639 | A | G | 0.676  | 0.4988 | +- | -47.4 | 2.035 | 1 | 0.1537  |
| rs2853032   | 11 | 118114258 | G | C | -0.676 | 0.4989 | -? | 0     | 0     | 0 | 1       |
| rs58293014  | 11 | 119685035 | C | T | -0.676 | 0.4989 | -? | 0     | 0     | 0 | 1       |
| rs9888142   | 11 | 119197843 | G | A | -0.676 | 0.4989 | -? | 0     | 0     | 0 | 1       |
| rs12361632  | 11 | 120215843 | G | C | -0.676 | 0.499  | -? | 0     | 0     | 0 | 1       |
| rs1614945   | 11 | 118116522 | C | A | -0.676 | 0.499  | -? | 0     | 0     | 0 | 1       |
| rs75461585  | 11 | 118287568 | G | A | 0.676  | 0.4991 | +- | 0     | 0.932 | 1 | 0.3345  |
| rs117434119 | 11 | 119509845 | T | C | 0.676  | 0.4992 | +  | 0     | 0     | 0 | 1       |
| rs138568456 | 11 | 120915270 | G | A | -0.676 | 0.4992 | -? | 0     | 0     | 0 | 1       |
| rs73576603  | 11 | 116917885 | A | G | -0.676 | 0.4992 | +- | 46.7  | 5.634 | 1 | 0.01762 |
| rs10750147  | 11 | 119375180 | A | G | -0.676 | 0.4993 | -? | 0     | 0     | 0 | 1       |
| rs11216462  | 11 | 117456121 | C | G | 0.676  | 0.4993 | +  | 0     | 0     | 0 | 1       |
| rs2515795   | 11 | 117817276 | A | G | -0.675 | 0.4994 | -? | 0     | 0     | 0 | 1       |
| rs11217974  | 11 | 120562489 | G | A | -0.675 | 0.4995 | -? | 0     | 0     | 0 | 1       |
| rs56130750  | 11 | 119762963 | A | G | -0.675 | 0.4997 | -? | 0     | 0     | 0 | 1       |
| rs598494    | 11 | 119366884 | C | G | 0.675  | 0.4997 | +  | 0     | 0     | 0 | 1       |
| rs619180    | 11 | 119366947 | T | C | 0.675  | 0.4997 | +  | 0     | 0     | 0 | 1       |
| rs620109    | 11 | 119367127 | T | C | 0.675  | 0.4997 | +  | 0     | 0     | 0 | 1       |
| rs10790185  | 11 | 117320352 | T | C | 0.675  | 0.4998 | +  | 0     | 0     | 0 | 1       |
| rs12799480  | 11 | 120194024 | T | C | 0.675  | 0.4999 | +  | 0     | 0     | 0 | 1       |
| rs11218080  | 11 | 120825271 | T | C | 0.674  | 0.5    | +  | 0     | 0     | 0 | 1       |
| rs5093      | 11 | 116693354 | A | G | 0.674  | 0.5    | +  | 0     | 0     | 0 | 1       |

|              |    |           |   |   |        |        |    |       |       |   |         |
|--------------|----|-----------|---|---|--------|--------|----|-------|-------|---|---------|
| rs4938656    | 11 | 119309436 | T | C | 0.674  | 0.5001 | -+ | -51.3 | 1.982 | 1 | 0.1591  |
| rs7113959    | 11 | 118379096 | A | T | -0.674 | 0.5002 | -+ | 0     | 0.913 | 1 | 0.3394  |
| rs11217506   | 11 | 119661809 | T | C | 0.674  | 0.5003 | ++ | 0     | 0.001 | 1 | 0.974   |
| rs146556537  | 11 | 117794456 | A | G | -0.674 | 0.5004 | -? | 0     | 0     | 0 | 1       |
| rs575021     | 11 | 119363369 | A | G | 0.674  | 0.5004 | +  | 0     | 0     | 0 | 1       |
| rs515278     | 11 | 119772239 | C | G | 0.674  | 0.5005 | +  | 0     | 0     | 0 | 1       |
| rs6589632    | 11 | 117759825 | T | C | 0.673  | 0.5007 | +  | 0     | 0     | 0 | 1       |
| rs7930658    | 11 | 117791353 | G | A | -0.673 | 0.5008 | -? | 0     | 0     | 0 | 1       |
| rs7940717    | 11 | 118055110 | T | G | 0.673  | 0.5008 | ++ | 0     | 0.077 | 1 | 0.7816  |
| rs111728839  | 11 | 120694966 | A | G | 0.673  | 0.5009 | +  | 0     | 0     | 0 | 1       |
| rs1240776    | 11 | 116536281 | T | C | 0.673  | 0.5009 | +  | 0     | 0     | 0 | 1       |
| rs1939674    | 11 | 120630546 | G | T | 0.673  | 0.501  | +  | 0     | 0     | 0 | 1       |
| rs7115526    | 11 | 117239190 | T | G | -0.673 | 0.501  | -? | 0     | 0     | 0 | 1       |
| rs1787690    | 11 | 116568516 | T | G | 0.673  | 0.5011 | +  | 0     | 0     | 0 | 1       |
| rs612979     | 11 | 117404179 | G | T | 0.672  | 0.5013 | +  | 0     | 0     | 0 | 1       |
| rs3018367    | 11 | 118119020 | T | C | -0.672 | 0.5014 | -? | 0     | 0     | 0 | 1       |
| rs73009916   | 11 | 117848134 | T | C | 0.672  | 0.5016 | +  | 0     | 0     | 0 | 1       |
| rs76477544   | 11 | 116308634 | G | A | 0.672  | 0.5017 | +  | 0     | 0     | 0 | 1       |
| rs477756     | 11 | 119702432 | C | T | 0.672  | 0.5018 | +  | 0     | 0     | 0 | 1       |
| rs1793135    | 11 | 118129705 | T | C | -0.672 | 0.5019 | -? | 0     | 0     | 0 | 1       |
| rs1418140540 | 11 | 120619909 | C | T | -0.671 | 0.502  | -? | 0     | 0     | 0 | 1       |
| rs28423005   | 11 | 118183733 | T | C | -0.671 | 0.502  | -+ | 1.8   | 3.055 | 1 | 0.08048 |
| rs139352710  | 11 | 117233378 | A | G | 0.671  | 0.5021 | +  | 0     | 0     | 0 | 1       |
| rs4938750    | 11 | 119876697 | A | G | -0.671 | 0.5021 | -? | 0     | 0     | 0 | 1       |
| rs4938753    | 11 | 119877108 | T | C | -0.671 | 0.5021 | -? | 0     | 0     | 0 | 1       |
| rs140110112  | 11 | 118629959 | A | G | 0.671  | 0.5022 | ++ | 0     | 0.247 | 1 | 0.6194  |
| rs34239965   | 11 | 119810909 | T | C | -0.671 | 0.5022 | -? | 0     | 0     | 0 | 1       |
| rs11218118   | 11 | 120896549 | G | A | -0.671 | 0.5024 | -? | 0     | 0     | 0 | 1       |
| rs10892433   | 11 | 119573259 | T | C | -0.67  | 0.5026 | -? | 0     | 0     | 0 | 1       |
| rs1715457    | 11 | 118123488 | A | G | -0.67  | 0.5026 | -? | 0     | 0     | 0 | 1       |
| rs1715458    | 11 | 118122737 | A | G | -0.67  | 0.5026 | -? | 0     | 0     | 0 | 1       |
| rs1939983    | 11 | 117604229 | G | C | 0.67   | 0.5026 | +  | 0     | 0     | 0 | 1       |
| rs7935561    | 11 | 118056722 | A | G | 0.67   | 0.5026 | ++ | 0     | 0.08  | 1 | 0.7777  |
| rs10790232   | 11 | 117976332 | A | C | -0.67  | 0.5027 | -? | 0     | 0     | 0 | 1       |
| rs10892214   | 11 | 117977388 | G | C | -0.67  | 0.5027 | -? | 0     | 0     | 0 | 1       |
| rs12361041   | 11 | 120821862 | G | A | 0.67   | 0.5028 | +  | 0     | 0     | 0 | 1       |
| rs11217815   | 11 | 120190262 | A | G | 0.67   | 0.503  | +  | 0     | 0     | 0 | 1       |
| rs4252279    | 11 | 117867187 | T | C | 0.669  | 0.5033 | +- | 0     | 0.238 | 1 | 0.6257  |
| rs947986     | 11 | 116569204 | A | G | 0.669  | 0.5035 | +  | 0     | 0     | 0 | 1       |
| rs55771168   | 11 | 119070949 | C | T | 0.669  | 0.5036 | +  | 0     | 0     | 0 | 1       |
| rs9651682    | 11 | 117240357 | A | G | -0.669 | 0.5036 | -? | 0     | 0     | 0 | 1       |
| rs11216804   | 11 | 118057320 | G | A | 0.669  | 0.5037 | ++ | 0     | 0.087 | 1 | 0.7676  |
| rs604361     | 11 | 119365917 | T | C | 0.668  | 0.5039 | +  | 0     | 0     | 0 | 1       |
| rs4936494    | 11 | 119568715 | A | G | -0.668 | 0.504  | -? | 0     | 0     | 0 | 1       |
| rs4936495    | 11 | 119568719 | C | T | -0.668 | 0.504  | -? | 0     | 0     | 0 | 1       |
| rs12796722   | 11 | 117473770 | T | C | -0.668 | 0.5041 | -+ | 0     | 0.153 | 1 | 0.6961  |
| rs579427     | 11 | 119363885 | T | C | 0.668  | 0.5041 | +  | 0     | 0     | 0 | 1       |
| rs73006770   | 11 | 119648394 | A | G | -0.668 | 0.5043 | -? | 0     | 0     | 0 | 1       |
| rs2155168    | 11 | 119876028 | T | C | -0.668 | 0.5044 | -? | 0     | 0     | 0 | 1       |
| rs885430     | 11 | 119572441 | G | A | -0.668 | 0.5044 | -? | 0     | 0     | 0 | 1       |
| rs2000874    | 11 | 120516717 | G | A | -0.667 | 0.5045 | -? | 0     | 0     | 0 | 1       |
| rs4142636    | 11 | 117604479 | T | C | 0.667  | 0.5047 | +  | 0     | 0     | 0 | 1       |
| rs1022081    | 11 | 119509746 | G | C | 0.667  | 0.5048 | +  | 0     | 0     | 0 | 1       |
| rs867899     | 11 | 116388314 | A | G | -0.667 | 0.5048 | -? | 0     | 0     | 0 | 1       |
| rs11218065   | 11 | 120808289 | T | G | -0.667 | 0.505  | -+ | 0     | 0.567 | 1 | 0.4514  |
| rs45509899   | 11 | 119217633 | T | C | 0.667  | 0.505  | +  | 0     | 0     | 0 | 1       |

|             |    |           |   |   |        |        |   |      |       |   |         |
|-------------|----|-----------|---|---|--------|--------|---|------|-------|---|---------|
| rs4936492   | 11 | 119560449 | A | G | 0.667  | 0.505  | + | 0    | 0     | 0 | 1       |
| rs626258    | 11 | 119943918 | A | G | 0.667  | 0.505  | + | 0    | 0     | 0 | 1       |
| rs11607356  | 11 | 116558455 | C | A | 0.666  | 0.5051 | + | 0    | 0     | 0 | 1       |
| rs7934906   | 11 | 119488133 | T | C | -0.666 | 0.5055 | - | 0    | 0     | 0 | 1       |
| rs17124570  | 11 | 120805056 | A | G | 0.666  | 0.5056 | + | 0    | 0     | 0 | 1       |
| rs11217613  | 11 | 119858093 | G | A | -0.666 | 0.5057 | - | 0    | 0     | 0 | 1       |
| rs4936561   | 11 | 120741935 | C | G | 0.666  | 0.5057 | + | 0    | 0     | 0 | 1       |
| rs10750139  | 11 | 119065709 | G | C | -0.665 | 0.5058 | - | 0    | 0     | 0 | 1       |
| rs673454    | 11 | 118992919 | A | C | 0.665  | 0.5058 | + | 0    | 0     | 0 | 1       |
| rs3902979   | 11 | 120515929 | C | T | -0.665 | 0.5059 | - | 0    | 0     | 0 | 1       |
| rs481716    | 11 | 119747312 | G | A | -0.665 | 0.5059 | - | 0    | 0     | 0 | 1       |
| rs78740143  | 11 | 116486030 | A | G | -0.665 | 0.5059 | - | 0    | 0     | 0 | 1       |
| rs57811256  | 11 | 117705239 | C | G | 0.665  | 0.506  | + | 0    | 0     | 0 | 1       |
| rs629272    | 11 | 119365993 | A | G | 0.665  | 0.5061 | + | 0    | 0     | 0 | 1       |
| rs10750172  | 11 | 120270253 | G | A | -0.665 | 0.5062 | - | 0    | 0     | 0 | 1       |
| rs606630    | 11 | 119384079 | T | C | 0.665  | 0.5063 | + | 0    | 0     | 0 | 1       |
| rs11216802  | 11 | 118057227 | T | C | 0.664  | 0.5065 | + | 0    | 0.082 | 1 | 0.775   |
| rs117275185 | 11 | 119690540 | T | C | -0.664 | 0.5065 | - | 0    | 0     | 0 | 1       |
| rs12794946  | 11 | 120353298 | C | A | -0.664 | 0.5066 | - | 0    | 0     | 0 | 1       |
| rs1343789   | 11 | 120516014 | C | T | -0.664 | 0.5066 | - | 0    | 0     | 0 | 1       |
| rs7125256   | 11 | 119926054 | G | A | 0.664  | 0.5067 | + | 0    | 0     | 0 | 1       |
| rs619054    | 11 | 116660813 | A | G | -0.664 | 0.5068 | - | 24   | 3.949 | 1 | 0.04691 |
| rs79446094  | 11 | 120694926 | G | A | 0.664  | 0.5068 | + | 0    | 0     | 0 | 1       |
| rs4938638   | 11 | 119075429 | G | A | -0.664 | 0.507  | - | 0    | 0     | 0 | 1       |
| rs7126918   | 11 | 119874855 | A | T | -0.663 | 0.5071 | - | 0    | 0     | 0 | 1       |
| rs17245511  | 11 | 120186190 | A | G | -0.663 | 0.5073 | - | 0    | 0     | 0 | 1       |
| rs4245210   | 11 | 119831773 | A | G | -0.663 | 0.5073 | - | 0    | 0     | 0 | 1       |
| rs4936567   | 11 | 120819893 | T | G | -0.663 | 0.5073 | - | 0    | 0.564 | 1 | 0.4527  |
| rs10892508  | 11 | 119860539 | G | C | 0.663  | 0.5075 | + | 0    | 0     | 0 | 1       |
| rs1784118   | 11 | 116565055 | T | C | 0.663  | 0.5076 | + | 0    | 0     | 0 | 1       |
| rs1787717   | 11 | 116552766 | T | C | 0.663  | 0.5076 | + | 0    | 0     | 0 | 1       |
| rs669226    | 11 | 117450432 | C | A | 0.662  | 0.5079 | + | 0    | 0     | 0 | 1       |
| rs10892098  | 11 | 117238491 | T | C | -0.661 | 0.5083 | - | 0    | 0     | 0 | 1       |
| rs12797135  | 11 | 117473944 | T | C | -0.662 | 0.5083 | - | 0    | 0.15  | 1 | 0.6989  |
| rs1784126   | 11 | 116538215 | T | G | 0.661  | 0.5084 | + | 0    | 0     | 0 | 1       |
| rs1787709   | 11 | 116561328 | G | C | -0.661 | 0.5085 | - | 0    | 0     | 0 | 1       |
| rs61582023  | 11 | 116911784 | G | A | -0.661 | 0.5085 | - | 47.1 | 5.673 | 1 | 0.01723 |
| rs11217257  | 11 | 119238455 | G | A | 0.661  | 0.5088 | + | 0    | 0     | 0 | 1       |
| rs35176806  | 11 | 120851210 | G | C | -0.661 | 0.5089 | - | 0    | 0     | 0 | 1       |
| rs11216803  | 11 | 118057244 | A | C | 0.66   | 0.509  | + | 0    | 0.083 | 1 | 0.7733  |
| rs11216857  | 11 | 118235246 | A | G | 0.66   | 0.5093 | - | 6.7  | 3.214 | 1 | 0.07302 |
| rs882398    | 11 | 116573838 | C | T | -0.66  | 0.5093 | - | 0    | 0     | 0 | 1       |
| rs948775    | 11 | 117586698 | C | T | 0.66   | 0.5093 | + | 0    | 0     | 0 | 1       |
| rs667319    | 11 | 119364258 | G | A | 0.66   | 0.5094 | + | 0    | 0     | 0 | 1       |
| rs79481471  | 11 | 118296658 | A | G | 0.66   | 0.5096 | + | 0    | 0.165 | 1 | 0.6846  |
| rs1893261   | 11 | 120198093 | A | G | -0.659 | 0.5099 | - | 0    | 0     | 0 | 1       |
| rs2508445   | 11 | 117872544 | T | G | 0.659  | 0.51   | + | 0    | 0.006 | 1 | 0.9364  |
| rs534761    | 11 | 117662248 | T | C | -0.659 | 0.5102 | - | 0    | 0     | 0 | 1       |
| rs577651    | 11 | 117471825 | T | C | -0.658 | 0.5104 | - | 0    | 0     | 0 | 1       |
| rs74661474  | 11 | 117250530 | A | G | -0.658 | 0.5106 | - | 0    | 0     | 0 | 1       |
| rs1263160   | 11 | 116744447 | C | T | -0.657 | 0.5109 | - | 49.8 | 5.977 | 1 | 0.0145  |
| rs3020103   | 11 | 120685533 | G | A | 0.657  | 0.5109 | + | 0    | 0     | 0 | 1       |
| rs10892474  | 11 | 119687133 | C | T | 0.657  | 0.511  | + | 0    | 0     | 0 | 1       |
| rs79845538  | 11 | 119686891 | C | T | 0.657  | 0.511  | + | 0    | 0     | 0 | 1       |
| rs2305010   | 11 | 120330149 | C | G | -0.657 | 0.5112 | - | 0    | 0     | 0 | 1       |
| rs75954141  | 11 | 120694254 | C | A | 0.657  | 0.5112 | + | 0    | 0     | 0 | 1       |

|             |    |           |   |   |        |        |    |        |       |   |         |
|-------------|----|-----------|---|---|--------|--------|----|--------|-------|---|---------|
| rs630403    | 11 | 118027074 | A | G | -0.657 | 0.5114 | -? | 0      | 0     | 0 | 1       |
| rs7126576   | 11 | 117420748 | C | T | -0.657 | 0.5114 | -? | 0      | 0     | 0 | 1       |
| rs35462788  | 11 | 119811909 | T | C | -0.657 | 0.5115 | -? | 0      | 0     | 0 | 1       |
| rs139254418 | 11 | 117380309 | G | A | 0.656  | 0.5116 | +  | 0      | 0     | 0 | 1       |
| rs45555132  | 11 | 118064030 | T | G | -0.656 | 0.5116 | -? | 0      | 0     | 0 | 1       |
| rs7118773   | 11 | 119969933 | A | G | 0.656  | 0.5116 | +  | 0      | 0     | 0 | 1       |
| rs1784127   | 11 | 116538576 | A | G | 0.656  | 0.5118 | +  | 0      | 0     | 0 | 1       |
| rs11216447  | 11 | 117416832 | A | G | 0.656  | 0.5119 | +  | 0      | 0     | 0 | 1       |
| rs7104454   | 11 | 120636167 | G | A | 0.656  | 0.512  | +  | 0      | 0     | 0 | 1       |
| rs10892647  | 11 | 120804291 | G | A | 0.656  | 0.5121 | +  | 0      | 0     | 0 | 1       |
| rs117476293 | 11 | 120898097 | C | A | 0.656  | 0.5121 | +  | 0      | 0     | 0 | 1       |
| rs4573685   | 11 | 120696297 | A | G | 0.656  | 0.5121 | +  | 0      | 0     | 0 | 1       |
| rs144553689 | 11 | 119381144 | C | T | -0.655 | 0.5123 | -? | 0      | 0     | 0 | 1       |
| rs76181827  | 11 | 120275039 | G | C | -0.655 | 0.5123 | -? | 0      | 0     | 0 | 1       |
| rs77779915  | 11 | 116232179 | T | G | -0.655 | 0.5124 | -? | 0      | 0     | 0 | 1       |
| rs11216432  | 11 | 117379572 | T | C | 0.655  | 0.5125 | +  | 0      | 0     | 0 | 1       |
| rs12271393  | 11 | 120149004 | A | G | -0.655 | 0.5125 | -? | 0      | 0     | 0 | 1       |
| rs1473177   | 11 | 116759332 | C | T | 0.655  | 0.5125 | +  | 0      | 0     | 0 | 1       |
| rs75208530  | 11 | 120694466 | G | A | 0.654  | 0.5129 | +  | 0      | 0     | 0 | 1       |
| rs117889337 | 11 | 116564493 | T | C | -0.654 | 0.5132 | -- | 0      | 0.015 | 1 | 0.9035  |
| rs61903734  | 11 | 117201056 | A | T | -0.654 | 0.5132 | -? | 0      | 0     | 0 | 1       |
| rs71482170  | 11 | 119019877 | A | G | 0.654  | 0.5132 | +  | 0      | 0     | 0 | 1       |
| rs1126924   | 11 | 118178007 | T | C | -0.654 | 0.5133 | +  | -4.5   | 2.871 | 1 | 0.09016 |
| rs151336980 | 11 | 120470737 | T | C | -0.654 | 0.5134 | -? | 0      | 0     | 0 | 1       |
| rs74676521  | 11 | 116335869 | A | C | -0.654 | 0.5134 | -? | 0      | 0     | 0 | 1       |
| rs1942928   | 11 | 117605046 | G | A | 0.653  | 0.5136 | +  | 0      | 0     | 0 | 1       |
| rs1558861   | 11 | 116607437 | C | T | -0.653 | 0.5137 | +  | -125.2 | 1.332 | 1 | 0.2484  |
| rs35734851  | 11 | 120206746 | A | G | 0.653  | 0.5138 | +  | 0      | 0     | 0 | 1       |
| rs4938449   | 11 | 117757685 | A | T | 0.653  | 0.5138 | +  | 0      | 0     | 0 | 1       |
| rs12419495  | 11 | 117383816 | C | T | 0.652  | 0.5142 | +  | 0      | 0     | 0 | 1       |
| rs36011588  | 11 | 120196433 | G | C | -0.652 | 0.5144 | -? | 0      | 0     | 0 | 1       |
| rs60016568  | 11 | 121062777 | T | C | -0.652 | 0.5144 | -? | 0      | 0     | 0 | 1       |
| rs1784123   | 11 | 116561381 | C | T | -0.652 | 0.5145 | -? | 0      | 0     | 0 | 1       |
| rs4561221   | 11 | 120444179 | T | C | -0.651 | 0.5149 | -? | 0      | 0     | 0 | 1       |
| rs9326246   | 11 | 116611733 | C | G | -0.651 | 0.5149 | +  | -124.8 | 1.335 | 1 | 0.248   |
| rs683630    | 11 | 119365552 | T | C | 0.651  | 0.5151 | +  | 0      | 0     | 0 | 1       |
| rs74490241  | 11 | 117309494 | A | C | 0.651  | 0.5151 | +  | 0      | 0     | 0 | 1       |
| rs79423267  | 11 | 117312576 | A | G | 0.651  | 0.5151 | +  | 0      | 0     | 0 | 1       |
| rs11216379  | 11 | 117291756 | G | A | -0.651 | 0.5152 | -? | 0      | 0     | 0 | 1       |
| rs1145184   | 11 | 116513182 | A | G | 0.651  | 0.5152 | +  | 0      | 0     | 0 | 1       |
| rs888246    | 11 | 116724232 | T | C | 0.651  | 0.5153 | +  | 0      | 0     | 0 | 1       |
| rs11216622  | 11 | 117791929 | A | C | -0.65  | 0.5154 | -? | 0      | 0     | 0 | 1       |
| rs4252243   | 11 | 117855727 | T | C | 0.65   | 0.5154 | +  | 0      | 0.213 | 1 | 0.6444  |
| rs57584368  | 11 | 120783331 | C | T | -0.65  | 0.5157 | -? | 0      | 0     | 0 | 1       |
| rs111765459 | 11 | 117083373 | C | T | -0.65  | 0.5158 | -? | 0      | 0     | 0 | 1       |
| rs574387    | 11 | 118337003 | C | A | 0.65   | 0.5158 | ++ | 0      | 0.003 | 1 | 0.96    |
| rs608840    | 11 | 117150210 | A | G | 0.65   | 0.5158 | +  | 0      | 0     | 0 | 1       |
| rs10892003  | 11 | 116507479 | G | A | -0.65  | 0.5159 | -? | 0      | 0     | 0 | 1       |
| rs4537793   | 11 | 118053156 | A | C | 0.65   | 0.5159 | ++ | 0      | 0.705 | 1 | 0.4011  |
| rs11217526  | 11 | 119697028 | A | T | 0.649  | 0.5161 | +  | 0      | 0     | 0 | 1       |
| rs12273260  | 11 | 118137524 | T | C | 0.649  | 0.5161 | +  | 18.9   | 3.697 | 1 | 0.0545  |
| rs11217547  | 11 | 119742279 | A | G | 0.649  | 0.5162 | +  | 0      | 0     | 0 | 1       |
| rs4936562   | 11 | 120741937 | C | T | 0.649  | 0.5162 | +  | 0      | 0     | 0 | 1       |
| rs680210    | 11 | 117172820 | T | C | -0.649 | 0.5165 | -? | 0      | 0     | 0 | 1       |
| rs501171    | 11 | 117692394 | T | C | -0.649 | 0.5166 | -? | 0      | 0     | 0 | 1       |
| rs183832950 | 11 | 120633447 | T | G | 0.648  | 0.5168 | +  | 0      | 0     | 0 | 1       |

|             |    |           |   |   |        |        |    |       |       |   |         |
|-------------|----|-----------|---|---|--------|--------|----|-------|-------|---|---------|
| rs1970750   | 11 | 118149122 | T | C | 0.648  | 0.5169 | +  | 0     | 0     | 0 | 1       |
| rs7950804   | 11 | 119683867 | G | A | 0.648  | 0.5169 | ++ | 0     | 0.003 | 1 | 0.9564  |
| rs721486    | 11 | 117557540 | G | A | 0.648  | 0.517  | +  | 0     | 0     | 0 | 1       |
| rs7950719   | 11 | 119683955 | C | T | 0.648  | 0.5172 | ++ | 0     | 0.003 | 1 | 0.9562  |
| rs891291    | 11 | 119376478 | C | G | -0.648 | 0.5172 | -? | 0     | 0     | 0 | 1       |
| rs1793165   | 11 | 118115879 | A | C | -0.648 | 0.5173 | -? | 0     | 0     | 0 | 1       |
| rs7950042   | 11 | 119683473 | A | C | 0.647  | 0.5173 | ++ | 0     | 0.003 | 1 | 0.9545  |
| rs3176905   | 11 | 118755630 | C | T | 0.647  | 0.5174 | +- | 29    | 4.223 | 1 | 0.03988 |
| rs6589796   | 11 | 119970538 | A | C | 0.647  | 0.5174 | +  | 0     | 0     | 0 | 1       |
| rs9804646   | 11 | 116665079 | T | C | -0.647 | 0.5174 | -- | 0     | 0.127 | 1 | 0.7216  |
| rs4381380   | 11 | 120273316 | A | G | -0.647 | 0.5176 | -? | 0     | 0     | 0 | 1       |
| rs11218169  | 11 | 121029733 | G | A | -0.647 | 0.5179 | -? | 0     | 0     | 0 | 1       |
| rs78053944  | 11 | 117795742 | T | C | 0.647  | 0.5179 | +  | 0     | 0     | 0 | 1       |
| rs2850804   | 11 | 120793972 | A | G | 0.646  | 0.5181 | +- | -77.7 | 1.688 | 1 | 0.1938  |
| rs11215931  | 11 | 116308090 | G | A | -0.646 | 0.5183 | -? | 0     | 0     | 0 | 1       |
| rs3935405   | 11 | 119572103 | T | C | -0.645 | 0.5189 | -? | 0     | 0     | 0 | 1       |
| rs611478    | 11 | 119784330 | A | G | 0.645  | 0.519  | +  | 0     | 0     | 0 | 1       |
| rs2512155   | 11 | 117889448 | T | C | 0.645  | 0.5192 | +- | -115  | 1.396 | 1 | 0.2375  |
| rs3018284   | 11 | 120612223 | G | T | 0.645  | 0.5192 | +  | 0     | 0     | 0 | 1       |
| rs7115491   | 11 | 117295150 | G | T | -0.645 | 0.5192 | -? | 0     | 0     | 0 | 1       |
| rs7950403   | 11 | 119683777 | A | G | 0.644  | 0.5194 | ++ | 0     | 0.003 | 1 | 0.9546  |
| rs111444487 | 11 | 119853252 | C | T | -0.644 | 0.5195 | -? | 0     | 0     | 0 | 1       |
| rs7107003   | 11 | 116532855 | C | T | 0.644  | 0.5196 | +  | 0     | 0     | 0 | 1       |
| rs891292    | 11 | 119376672 | G | A | -0.644 | 0.5196 | -? | 0     | 0     | 0 | 1       |
| rs751368    | 11 | 120610584 | T | G | 0.644  | 0.5198 | +  | 0     | 0     | 0 | 1       |
| rs689291    | 11 | 119361783 | C | G | 0.643  | 0.5199 | +  | 0     | 0     | 0 | 1       |
| rs10160375  | 11 | 117954250 | C | T | 0.643  | 0.5201 | ++ | 0     | 0.129 | 1 | 0.7194  |
| rs686593    | 11 | 119362414 | G | C | 0.643  | 0.5201 | +  | 0     | 0     | 0 | 1       |
| rs28989473  | 11 | 117179535 | A | G | 0.643  | 0.5203 | +  | 0     | 0     | 0 | 1       |
| rs12226432  | 11 | 120093920 | C | A | 0.642  | 0.5207 | +  | 0     | 0     | 0 | 1       |
| rs2155809   | 11 | 120148567 | A | T | -0.642 | 0.5207 | -? | 0     | 0     | 0 | 1       |
| rs4936368   | 11 | 117093486 | T | C | -0.642 | 0.5207 | -? | 0     | 0     | 0 | 1       |
| rs4938359   | 11 | 117093560 | G | A | -0.642 | 0.5207 | -? | 0     | 0     | 0 | 1       |
| rs4938749   | 11 | 119876516 | G | A | -0.642 | 0.5208 | -? | 0     | 0     | 0 | 1       |
| rs79219038  | 11 | 120159612 | T | C | -0.642 | 0.5209 | -? | 0     | 0     | 0 | 1       |
| rs10790224  | 11 | 117805536 | C | T | -0.642 | 0.5211 | -? | 0     | 0     | 0 | 1       |
| rs502483    | 11 | 116251791 | T | A | -0.642 | 0.5211 | -? | 0     | 0     | 0 | 1       |
| rs7105258   | 11 | 120657044 | T | C | 0.641  | 0.5212 | +  | 0     | 0     | 0 | 1       |
| rs747061    | 11 | 117330736 | G | C | 0.641  | 0.5213 | +  | 0     | 0     | 0 | 1       |
| rs4445645   | 11 | 118868750 | C | G | -0.641 | 0.5215 | -- | 0     | 0.004 | 1 | 0.9526  |
| rs11601535  | 11 | 120333801 | G | A | -0.641 | 0.5217 | -? | 0     | 0     | 0 | 1       |
| rs11600380  | 11 | 116670182 | C | T | -0.641 | 0.5218 | -+ | 0     | 0.388 | 1 | 0.5331  |
| rs61905260  | 11 | 117300380 | A | G | -0.641 | 0.5218 | -? | 0     | 0     | 0 | 1       |
| rs3133864   | 11 | 120628012 | T | C | -0.64  | 0.5219 | -? | 0     | 0     | 0 | 1       |
| rs79326407  | 11 | 116778293 | T | C | 0.64   | 0.5219 | +  | 0     | 0     | 0 | 1       |
| rs111809212 | 11 | 117099537 | C | T | 0.64   | 0.5222 | +  | 0     | 0     | 0 | 1       |
| rs17475957  | 11 | 116241411 | A | G | 0.64   | 0.5224 | +  | 0     | 0     | 0 | 1       |
| rs642548    | 11 | 120988792 | C | T | -0.64  | 0.5224 | -- | 0     | 0.293 | 1 | 0.5881  |
| rs6589620   | 11 | 117612254 | A | T | 0.64   | 0.5224 | +  | 0     | 0     | 0 | 1       |
| rs7110219   | 11 | 117420336 | A | G | -0.639 | 0.5225 | -? | 0     | 0     | 0 | 1       |
| rs74900182  | 11 | 121164050 | T | C | 0.639  | 0.5226 | +  | 0     | 0     | 0 | 1       |
| rs10892648  | 11 | 120812025 | A | C | 0.639  | 0.5228 | +  | 0     | 0     | 0 | 1       |
| rs71480317  | 11 | 116572169 | C | T | 0.639  | 0.5228 | +  | 0     | 0     | 0 | 1       |
| rs7483350   | 11 | 119040463 | G | C | -0.639 | 0.5228 | -? | 0     | 0     | 0 | 1       |
| rs470941    | 11 | 119999755 | C | T | 0.639  | 0.5229 | +  | 0     | 0     | 0 | 1       |
| rs536859    | 11 | 117362425 | A | G | 0.639  | 0.523  | +  | 0     | 0     | 0 | 1       |

|              |    |           |   |   |        |        |   |       |       |   |         |
|--------------|----|-----------|---|---|--------|--------|---|-------|-------|---|---------|
| rs117754274  | 11 | 117225247 | C | G | 0.639  | 0.5231 | + | 0     | 0     | 0 | 1       |
| rs12281635   | 11 | 120496044 | G | A | 0.638  | 0.5233 | + | 0     | 0     | 0 | 1       |
| rs1374117    | 11 | 116709438 | T | C | 0.638  | 0.5233 | + | 0     | 0     | 0 | 1       |
| rs113078426  | 11 | 119795996 | G | A | -0.638 | 0.5234 | - | 0     | 0     | 0 | 1       |
| rs34458464   | 11 | 117628944 | G | A | 0.638  | 0.5235 | + | 0     | 0     | 0 | 1       |
| rs56257632   | 11 | 116959601 | C | T | -0.638 | 0.5235 | + | 47.7  | 5.737 | 1 | 0.01661 |
| rs71484170   | 11 | 120341938 | C | T | 0.637  | 0.524  | + | 0     | 0     | 0 | 1       |
| rs2105610    | 11 | 116535126 | C | T | -0.637 | 0.5241 | - | 0     | 0     | 0 | 1       |
| rs28917234   | 11 | 117186506 | A | G | 0.637  | 0.5241 | + | 0     | 0     | 0 | 1       |
| rs7927820    | 11 | 116682156 | G | A | 0.637  | 0.5243 | + | 0     | 0     | 0 | 1       |
| rs10892624   | 11 | 120651537 | A | G | 0.637  | 0.5244 | + | 0     | 0     | 0 | 1       |
| rs576642     | 11 | 119987219 | C | T | -0.636 | 0.5245 | - | 0     | 0     | 0 | 1       |
| rs949295     | 11 | 120789852 | C | T | 0.636  | 0.5245 | + | 0     | 0     | 0 | 1       |
| rs4252246    | 11 | 117858185 | A | C | 0.636  | 0.5247 | + | 0     | 0.231 | 1 | 0.6307  |
| rs3902978    | 11 | 120515939 | A | G | -0.636 | 0.5248 | - | 0     | 0     | 0 | 1       |
| rs895645     | 11 | 119684321 | G | A | 0.636  | 0.525  | + | 0     | 0.004 | 1 | 0.9507  |
| rs895647     | 11 | 119684145 | T | G | 0.636  | 0.525  | + | 0     | 0.004 | 1 | 0.9507  |
| rs61122660   | 11 | 120069087 | A | G | 0.635  | 0.5253 | + | 0     | 0     | 0 | 1       |
| rs11601826   | 11 | 120440043 | G | A | -0.635 | 0.5256 | - | 0     | 0     | 0 | 1       |
| rs744984     | 11 | 120166410 | G | A | -0.635 | 0.5256 | - | 0     | 0.047 | 1 | 0.8283  |
| rs1787708    | 11 | 116561393 | A | G | -0.634 | 0.5258 | - | 0     | 0     | 0 | 1       |
| rs10750143   | 11 | 119332065 | G | A | -0.634 | 0.5259 | - | 0     | 0     | 0 | 1       |
| rs113048801  | 11 | 118827925 | A | G | -0.634 | 0.5259 | - | 0     | 0     | 0 | 1       |
| rs74808315   | 11 | 117107520 | G | C | -0.634 | 0.5259 | - | 0     | 0     | 0 | 1       |
| rs1207849774 | 11 | 119989572 | A | T | 0.634  | 0.526  | + | 0     | 0     | 0 | 1       |
| rs525028     | 11 | 116705516 | G | A | 0.634  | 0.5262 | + | 0     | 0     | 0 | 1       |
| rs12222094   | 11 | 119163540 | C | G | 0.634  | 0.5263 | + | 0     | 0.339 | 1 | 0.5606  |
| rs77451506   | 11 | 117142440 | G | C | -0.634 | 0.5264 | - | 0     | 0     | 0 | 1       |
| rs75723689   | 11 | 116468539 | A | G | 0.633  | 0.5265 | + | 0     | 0     | 0 | 1       |
| rs592525     | 11 | 119383853 | A | G | 0.633  | 0.5266 | + | 0     | 0     | 0 | 1       |
| rs12576431   | 11 | 116225940 | G | C | 0.633  | 0.5267 | + | -66.4 | 1.803 | 1 | 0.1793  |
| rs3133851    | 11 | 120600950 | A | G | 0.633  | 0.5267 | + | 0     | 0     | 0 | 1       |
| rs11217231   | 11 | 119162720 | C | G | 0.633  | 0.5268 | + | 0     | 0.339 | 1 | 0.5604  |
| rs4245191    | 11 | 119052826 | C | A | -0.633 | 0.5268 | - | 0     | 0     | 0 | 1       |
| rs481400     | 11 | 119784002 | G | A | 0.633  | 0.5268 | + | 0     | 0     | 0 | 1       |
| rs4245040    | 11 | 120520629 | T | C | -0.632 | 0.5271 | - | 0     | 0     | 0 | 1       |
| rs531411     | 11 | 119786013 | A | G | 0.632  | 0.5271 | + | 0     | 0     | 0 | 1       |
| rs895646     | 11 | 119684301 | T | G | 0.632  | 0.5272 | + | 0     | 0.004 | 1 | 0.9492  |
| rs34352231   | 11 | 117632531 | G | A | 0.632  | 0.5273 | + | 0     | 0     | 0 | 1       |
| rs58709307   | 11 | 118877563 | T | C | -0.631 | 0.5277 | - | 0     | 0.013 | 1 | 0.9095  |
| rs592347     | 11 | 119969030 | T | C | -0.631 | 0.5278 | - | 0     | 0     | 0 | 1       |
| rs75808396   | 11 | 117309527 | A | G | 0.631  | 0.5279 | + | 0     | 0     | 0 | 1       |
| rs7934690    | 11 | 117011299 | A | T | 0.631  | 0.5279 | + | 0     | 0     | 0 | 1       |
| rs143291574  | 11 | 116365421 | T | C | -0.631 | 0.5281 | - | 0     | 0     | 0 | 1       |
| rs523223     | 11 | 119763417 | A | G | 0.631  | 0.5283 | + | 0     | 0     | 0 | 1       |
| rs78459638   | 11 | 116972339 | A | G | 0.631  | 0.5283 | + | 0     | 0     | 0 | 1       |
| rs2121576    | 11 | 119683031 | G | A | 0.63   | 0.5288 | + | 0     | 0.005 | 1 | 0.9465  |
| rs2121577    | 11 | 119682999 | G | A | 0.63   | 0.5288 | + | 0     | 0.005 | 1 | 0.9465  |
| rs7936274    | 11 | 117324393 | T | C | 0.63   | 0.5289 | + | 0     | 0     | 0 | 1       |
| rs11218081   | 11 | 120825332 | C | T | -0.629 | 0.5292 | - | 0     | 0.535 | 1 | 0.4644  |
| rs7937319    | 11 | 119683964 | T | C | 0.629  | 0.5293 | + | 0     | 0.004 | 1 | 0.9477  |
| rs78760381   | 11 | 117922310 | T | C | 0.629  | 0.5294 | + | 0     | 0     | 0 | 1       |
| rs2239012    | 11 | 117088362 | G | A | -0.629 | 0.5295 | - | 0     | 0     | 0 | 1       |
| rs34172923   | 11 | 120145046 | G | C | -0.629 | 0.5295 | - | 0     | 0     | 0 | 1       |
| rs695083     | 11 | 117508837 | G | A | -0.629 | 0.5295 | - | 0     | 0     | 0 | 1       |
| rs7396851    | 11 | 116684164 | T | C | 0.629  | 0.5296 | + | 0     | 0     | 0 | 1       |

|             |    |           |   |   |        |        |    |        |       |   |         |
|-------------|----|-----------|---|---|--------|--------|----|--------|-------|---|---------|
| rs4252249   | 11 | 117859209 | A | G | 0.628  | 0.5297 | ++ | 0      | 0.113 | 1 | 0.737   |
| rs2305008   | 11 | 120319064 | C | A | -0.628 | 0.5298 | -? | 0      | 0     | 0 | 1       |
| rs11216435  | 11 | 117388932 | T | C | -0.628 | 0.5299 | -? | 0      | 0     | 0 | 1       |
| rs117243996 | 11 | 119940917 | T | C | 0.628  | 0.53   | +  | 0      | 0     | 0 | 1       |
| rs45514102  | 11 | 119061879 | C | G | -0.628 | 0.5301 | -? | 0      | 0     | 0 | 1       |
| rs4938727   | 11 | 119684565 | C | T | 0.628  | 0.5301 | ++ | 0      | 0.004 | 1 | 0.9472  |
| rs4245213   | 11 | 120273597 | A | G | -0.628 | 0.5303 | -? | 0      | 0     | 0 | 1       |
| rs73022414  | 11 | 117787277 | C | T | 0.628  | 0.5303 | +  | 0      | 0     | 0 | 1       |
| rs2846104   | 11 | 120652371 | G | C | 0.627  | 0.5306 | +  | 0      | 0     | 0 | 1       |
| rs4938728   | 11 | 119684646 | T | C | 0.627  | 0.5306 | ++ | 0      | 0.004 | 1 | 0.9468  |
| rs10111     | 11 | 118886117 | T | C | -0.627 | 0.5307 | -- | 0      | 0.018 | 1 | 0.8926  |
| rs1790474   | 11 | 119942571 | A | G | -0.627 | 0.5307 | -? | 0      | 0     | 0 | 1       |
| rs2121575   | 11 | 119683218 | C | G | 0.627  | 0.5308 | ++ | 0      | 0.005 | 1 | 0.9451  |
| rs3825050   | 11 | 117952097 | T | C | -0.627 | 0.5308 | -? | 0      | 0     | 0 | 1       |
| rs76468794  | 11 | 116576744 | A | G | -0.627 | 0.5308 | -- | 0      | 0     | 1 | 0.9922  |
| rs6589572   | 11 | 116681563 | G | A | 0.626  | 0.5312 | +  | 0      | 0     | 0 | 1       |
| rs71486352  | 11 | 121010048 | A | T | -0.626 | 0.5312 | -? | 0      | 0     | 0 | 1       |
| rs78302438  | 11 | 120184575 | G | T | -0.626 | 0.5313 | -? | 0      | 0     | 0 | 1       |
| rs11216665  | 11 | 117851174 | G | T | 0.626  | 0.5314 | ++ | 0      | 0.245 | 1 | 0.6203  |
| rs4936511   | 11 | 120150059 | C | A | -0.626 | 0.5314 | -? | 0      | 0     | 0 | 1       |
| rs477047    | 11 | 116485583 | A | T | 0.626  | 0.5315 | +  | 0      | 0     | 0 | 1       |
| rs79053194  | 11 | 116257372 | G | T | 0.626  | 0.5315 | +  | 0      | 0     | 0 | 1       |
| rs1073635   | 11 | 119972626 | T | C | -0.625 | 0.5321 | -? | 0      | 0     | 0 | 1       |
| rs11218005  | 11 | 120652936 | T | G | 0.625  | 0.5321 | +  | 0      | 0     | 0 | 1       |
| rs189431300 | 11 | 120034758 | A | G | -0.624 | 0.5323 | -? | 0      | 0     | 0 | 1       |
| rs11218082  | 11 | 120825348 | C | G | -0.624 | 0.5324 | -+ | 0      | 0.531 | 1 | 0.4661  |
| rs17492429  | 11 | 116453270 | C | G | 0.624  | 0.5325 | ++ | 0      | 0.02  | 1 | 0.8881  |
| rs2509390   | 11 | 119196915 | C | A | -0.624 | 0.5326 | -? | 0      | 0     | 0 | 1       |
| rs75343916  | 11 | 117311365 | T | C | 0.624  | 0.5326 | +  | 0      | 0     | 0 | 1       |
| rs3882895   | 11 | 117090545 | C | T | -0.624 | 0.5327 | -? | 0      | 0     | 0 | 1       |
| rs4938434   | 11 | 117592602 | G | T | 0.624  | 0.5327 | +  | 0      | 0     | 0 | 1       |
| rs2239010   | 11 | 117089006 | C | G | -0.624 | 0.5328 | -? | 0      | 0     | 0 | 1       |
| rs2239011   | 11 | 117088994 | G | A | -0.624 | 0.5328 | -? | 0      | 0     | 0 | 1       |
| rs10750110  | 11 | 117614307 | G | T | 0.624  | 0.5329 | +  | 0      | 0     | 0 | 1       |
| rs10892481  | 11 | 119742360 | T | C | 0.623  | 0.533  | +  | 0      | 0     | 0 | 1       |
| rs504485    | 11 | 119767614 | A | C | 0.623  | 0.5332 | +  | 0      | 0     | 0 | 1       |
| rs71480343  | 11 | 117421276 | A | G | -0.623 | 0.5332 | -? | 0      | 0     | 0 | 1       |
| rs4938477   | 11 | 117956579 | G | A | 0.623  | 0.5333 | +- | 0      | 0.248 | 1 | 0.6188  |
| rs10750174  | 11 | 120292097 | T | C | -0.623 | 0.5334 | -? | 0      | 0     | 0 | 1       |
| rs10892576  | 11 | 120294423 | T | C | -0.623 | 0.5334 | -? | 0      | 0     | 0 | 1       |
| rs1787710   | 11 | 116561202 | A | G | -0.623 | 0.5334 | -? | 0      | 0     | 0 | 1       |
| rs1787711   | 11 | 116560778 | G | A | -0.623 | 0.5334 | -? | 0      | 0     | 0 | 1       |
| rs7104655   | 11 | 119577632 | A | G | 0.623  | 0.5334 | +  | 0      | 0     | 0 | 1       |
| rs671182    | 11 | 119363485 | C | T | 0.622  | 0.5337 | +  | 0      | 0     | 0 | 1       |
| rs61906112  | 11 | 116555765 | A | T | -0.622 | 0.5339 | -? | 0      | 0     | 0 | 1       |
| rs622373    | 11 | 120256845 | G | A | -0.622 | 0.5339 | -? | 0      | 0     | 0 | 1       |
| rs7113994   | 11 | 118382327 | G | A | -0.622 | 0.5339 | -+ | -174.1 | 1.095 | 1 | 0.2954  |
| rs495420    | 11 | 117456360 | C | G | 0.622  | 0.5341 | +  | 0      | 0     | 0 | 1       |
| rs4245208   | 11 | 119688712 | C | T | 0.622  | 0.5342 | ++ | 0      | 0.005 | 1 | 0.9443  |
| rs2513099   | 11 | 116811057 | C | T | -0.621 | 0.5343 | +- | 48.1   | 5.782 | 1 | 0.01619 |
| rs1979023   | 11 | 116778180 | C | T | -0.621 | 0.5344 | +- | 51.2   | 6.151 | 1 | 0.01314 |
| rs67691204  | 11 | 117775367 | A | C | 0.621  | 0.5344 | +  | 0      | 0     | 0 | 1       |
| rs12799706  | 11 | 117521490 | C | T | 0.621  | 0.5347 | ++ | -155.8 | 1.173 | 1 | 0.2788  |
| rs4529912   | 11 | 117585788 | G | A | 0.621  | 0.5347 | +  | 0      | 0     | 0 | 1       |
| rs4936398   | 11 | 117586059 | G | A | 0.621  | 0.5347 | +  | 0      | 0     | 0 | 1       |
| rs61451669  | 11 | 117853666 | C | T | 0.621  | 0.5347 | ++ | 0      | 0.085 | 1 | 0.7709  |

|             |    |           |   |   |        |        |    |        |       |   |         |
|-------------|----|-----------|---|---|--------|--------|----|--------|-------|---|---------|
| rs4938806   | 11 | 120274353 | A | C | -0.621 | 0.5348 | -? | 0      | 0     | 0 | 1       |
| rs11216107  | 11 | 116579663 | C | T | -0.62  | 0.535  | -? | 0      | 0     | 0 | 1       |
| rs11600991  | 11 | 117600616 | C | T | 0.62   | 0.535  | +  | 0      | 0     | 0 | 1       |
| rs191347151 | 11 | 120702478 | T | C | 0.62   | 0.535  | +  | 0      | 0     | 0 | 1       |
| rs2368938   | 11 | 119684574 | C | T | 0.62   | 0.535  | ++ | 0      | 0.005 | 1 | 0.9437  |
| rs540780    | 11 | 117745418 | T | G | 0.62   | 0.535  | +  | 0      | 0     | 0 | 1       |
| rs11217770  | 11 | 120090735 | C | A | -0.62  | 0.5351 | -? | 0      | 0     | 0 | 1       |
| rs146525935 | 11 | 118180887 | C | T | 0.62   | 0.5352 | +- | 22.9   | 3.891 | 1 | 0.04855 |
| rs17311114  | 11 | 119872703 | C | T | -0.62  | 0.5352 | -? | 0      | 0     | 0 | 1       |
| rs676305    | 11 | 117133078 | T | C | 0.62   | 0.5352 | +  | 0      | 0     | 0 | 1       |
| rs73018464  | 11 | 117694399 | A | G | -0.62  | 0.5352 | -? | 0      | 0     | 0 | 1       |
| rs3017232   | 11 | 116560883 | T | C | -0.62  | 0.5353 | -? | 0      | 0     | 0 | 1       |
| rs623989    | 11 | 119359257 | G | T | 0.619  | 0.5357 | +  | 0      | 0     | 0 | 1       |
| rs6589571   | 11 | 116680418 | T | C | 0.619  | 0.5358 | +  | 0      | 0     | 0 | 1       |
| rs11216657  | 11 | 117839187 | C | A | 0.619  | 0.536  | ++ | 0      | 0.013 | 1 | 0.909   |
| rs1784120   | 11 | 116561859 | G | C | -0.619 | 0.536  | -? | 0      | 0     | 0 | 1       |
| rs1784122   | 11 | 116561701 | A | T | -0.619 | 0.536  | -? | 0      | 0     | 0 | 1       |
| rs1787705   | 11 | 116561938 | A | G | -0.619 | 0.536  | -? | 0      | 0     | 0 | 1       |
| rs668363    | 11 | 117144816 | C | A | 0.618  | 0.5363 | +  | 0      | 0     | 0 | 1       |
| rs2512149   | 11 | 117881601 | C | T | 0.618  | 0.5364 | +- | -143.3 | 1.233 | 1 | 0.2668  |
| rs11216440  | 11 | 117406111 | A | G | 0.618  | 0.5368 | +  | 0      | 0     | 0 | 1       |
| rs557773    | 11 | 119693206 | C | T | 0.618  | 0.5368 | ++ | 0      | 0.004 | 1 | 0.9521  |
| rs10892134  | 11 | 117386925 | T | C | 0.618  | 0.5369 | +  | 0      | 0     | 0 | 1       |
| rs6589803   | 11 | 120139700 | T | C | 0.618  | 0.5369 | +  | 0      | 0     | 0 | 1       |
| rs3802913   | 11 | 120738221 | G | C | 0.617  | 0.537  | +  | 0      | 0     | 0 | 1       |
| rs78849359  | 11 | 120565240 | T | C | 0.617  | 0.537  | +  | 0      | 0     | 0 | 1       |
| rs560320    | 11 | 116310757 | T | A | -0.617 | 0.5371 | -? | 0      | 0     | 0 | 1       |
| rs61898343  | 11 | 120182926 | C | G | -0.617 | 0.5371 | -? | 0      | 0     | 0 | 1       |
| rs10892211  | 11 | 117956409 | C | T | 0.617  | 0.5375 | +- | 0      | 0.225 | 1 | 0.6351  |
| rs2368939   | 11 | 119684789 | T | C | 0.617  | 0.5375 | ++ | 0      | 0.005 | 1 | 0.942   |
| rs11216037  | 11 | 116471044 | A | G | -0.616 | 0.5376 | -? | 0      | 0     | 0 | 1       |
| rs117498381 | 11 | 120242812 | T | A | -0.616 | 0.5378 | -? | 0      | 0     | 0 | 1       |
| rs142100881 | 11 | 119923914 | G | A | 0.616  | 0.5378 | +  | 0      | 0     | 0 | 1       |
| rs3016350   | 11 | 116474519 | T | C | -0.616 | 0.5378 | -? | 0      | 0     | 0 | 1       |
| rs11601357  | 11 | 116302248 | A | G | 0.616  | 0.5379 | +  | 0      | 0     | 0 | 1       |
| rs61905308  | 11 | 117357402 | T | C | -0.616 | 0.538  | -? | 0      | 0     | 0 | 1       |
| rs7926736   | 11 | 117549808 | A | G | -0.616 | 0.538  | -? | 0      | 0     | 0 | 1       |
| rs17121153  | 11 | 117603231 | T | C | 0.616  | 0.5382 | +  | 0      | 0     | 0 | 1       |
| rs17311414  | 11 | 120598007 | A | C | -0.615 | 0.5383 | -- | 0      | 0.729 | 1 | 0.3931  |
| rs675834    | 11 | 116737736 | A | T | -0.615 | 0.5383 | +- | 26.2   | 4.066 | 1 | 0.04376 |
| rs495981    | 11 | 119709638 | T | C | 0.615  | 0.5386 | +  | 0      | 0     | 0 | 1       |
| rs7113913   | 11 | 119941114 | T | C | -0.615 | 0.5386 | -? | 0      | 0     | 0 | 1       |
| rs79699220  | 11 | 118550841 | C | G | 0.615  | 0.5388 | ++ | 0      | 0.059 | 1 | 0.8087  |
| rs1787706   | 11 | 116561928 | A | G | -0.614 | 0.5394 | -? | 0      | 0     | 0 | 1       |
| rs4938300   | 11 | 116567619 | T | C | -0.614 | 0.5395 | -? | 0      | 0     | 0 | 1       |
| rs522848    | 11 | 116792445 | C | T | -0.614 | 0.5395 | +- | 48.3   | 5.804 | 1 | 0.01599 |
| rs6589573   | 11 | 116685766 | C | G | 0.613  | 0.5397 | +  | 0      | 0     | 0 | 1       |
| rs11218006  | 11 | 120653034 | A | G | 0.613  | 0.5401 | +  | 0      | 0     | 0 | 1       |
| rs12281008  | 11 | 120558389 | A | G | 0.613  | 0.5402 | +  | 0      | 0     | 0 | 1       |
| rs3802912   | 11 | 120738397 | A | G | 0.613  | 0.5402 | +  | 0      | 0     | 0 | 1       |
| rs11218198  | 11 | 121064444 | G | A | -0.612 | 0.5403 | -? | 0      | 0     | 0 | 1       |
| rs648374    | 11 | 119879425 | C | T | -0.612 | 0.5403 | -? | 0      | 0     | 0 | 1       |
| rs4938313   | 11 | 116671005 | A | G | -0.612 | 0.5404 | +- | -31.3  | 2.285 | 1 | 0.1306  |
| rs522742    | 11 | 117433965 | A | G | -0.612 | 0.5404 | -? | 0      | 0     | 0 | 1       |
| rs10892377  | 11 | 119381784 | A | G | -0.612 | 0.5405 | -? | 0      | 0     | 0 | 1       |
| rs12793410  | 11 | 120074907 | A | T | -0.612 | 0.5407 | -? | 0      | 0     | 0 | 1       |

|             |    |           |   |   |        |        |    |        |       |   |         |
|-------------|----|-----------|---|---|--------|--------|----|--------|-------|---|---------|
| rs61903662  | 11 | 117123782 | A | G | -0.612 | 0.5407 | -? | 0      | 0     | 0 | 1       |
| rs1061332   | 11 | 121178302 | A | C | -0.611 | 0.5409 | -? | 0      | 0     | 0 | 1       |
| rs2115649   | 11 | 119267694 | A | C | 0.611  | 0.5409 | -+ | -61.2  | 1.861 | 1 | 0.1725  |
| rs113872393 | 11 | 116331421 | A | G | -0.611 | 0.541  | -? | 0      | 0     | 0 | 1       |
| rs74236028  | 11 | 120589740 | G | T | 0.611  | 0.5411 | +? | 0      | 0     | 0 | 1       |
| rs61903747  | 11 | 117281264 | A | G | -0.611 | 0.5412 | -? | 0      | 0     | 0 | 1       |
| rs11217775  | 11 | 120121323 | C | T | -0.611 | 0.5415 | -? | 0      | 0     | 0 | 1       |
| rs615166    | 11 | 118803536 | A | G | 0.61   | 0.5415 | -+ | -100.1 | 1.499 | 1 | 0.2208  |
| rs7113973   | 11 | 119940945 | A | G | -0.611 | 0.5415 | -? | 0      | 0     | 0 | 1       |
| rs35801991  | 11 | 120507687 | C | T | 0.61   | 0.5416 | +? | 0      | 0     | 0 | 1       |
| rs4581461   | 11 | 119198092 | C | T | -0.61  | 0.5416 | -? | 0      | 0     | 0 | 1       |
| rs12290383  | 11 | 120170915 | A | T | -0.61  | 0.5418 | -? | 0      | 0     | 0 | 1       |
| rs4938277   | 11 | 116397532 | T | C | -0.61  | 0.5419 | -? | 0      | 0     | 0 | 1       |
| rs10790382  | 11 | 120288372 | C | T | -0.61  | 0.542  | -? | 0      | 0     | 0 | 1       |
| rs12224796  | 11 | 117776819 | G | A | -0.61  | 0.542  | -? | 0      | 0     | 0 | 1       |
| rs4936514   | 11 | 120168201 | C | G | -0.61  | 0.5421 | -- | 0      | 0.005 | 1 | 0.9438  |
| rs57232565  | 11 | 116611457 | T | C | -0.61  | 0.5421 | +- | -47    | 2.041 | 1 | 0.1531  |
| rs6589569   | 11 | 116671476 | T | C | -0.61  | 0.5421 | +- | -36.3  | 2.2   | 1 | 0.138   |
| rs2292293   | 11 | 119548698 | G | T | 0.609  | 0.5422 | +? | 0      | 0     | 0 | 1       |
| rs73020491  | 11 | 117775043 | A | G | 0.609  | 0.5423 | +? | 0      | 0     | 0 | 1       |
| rs75618086  | 11 | 121031731 | A | T | -0.609 | 0.5423 | -? | 0      | 0     | 0 | 1       |
| rs12793354  | 11 | 120084056 | C | A | -0.609 | 0.5425 | -? | 0      | 0     | 0 | 1       |
| rs2253006   | 11 | 120111853 | C | G | -0.609 | 0.5426 | -? | 0      | 0     | 0 | 1       |
| rs12284383  | 11 | 120148717 | G | A | -0.609 | 0.5428 | -? | 0      | 0     | 0 | 1       |
| rs58848374  | 11 | 116938655 | A | G | -0.609 | 0.5428 | +- | 41.3   | 5.11  | 1 | 0.02378 |
| rs2715888   | 11 | 120124953 | A | G | -0.608 | 0.5429 | -? | 0      | 0     | 0 | 1       |
| rs11216132  | 11 | 116634585 | C | T | -0.608 | 0.543  | -+ | 10     | 3.333 | 1 | 0.0679  |
| rs891441    | 11 | 121165092 | G | T | -0.608 | 0.543  | -? | 0      | 0     | 0 | 1       |
| rs592529    | 11 | 120981195 | T | C | 0.608  | 0.5431 | +? | 0      | 0     | 0 | 1       |
| rs655824    | 11 | 120834480 | C | T | 0.608  | 0.5431 | +? | 0      | 0     | 0 | 1       |
| rs71480342  | 11 | 117421267 | T | C | -0.608 | 0.5431 | -? | 0      | 0     | 0 | 1       |
| rs644867    | 11 | 118567545 | G | A | 0.608  | 0.5432 | ++ | 0      | 0.767 | 1 | 0.3812  |
| rs4938435   | 11 | 117594364 | G | A | 0.608  | 0.5434 | +? | 0      | 0     | 0 | 1       |
| rs11217802  | 11 | 120167230 | T | C | -0.608 | 0.5435 | -- | 0      | 0.005 | 1 | 0.9448  |
| rs12225696  | 11 | 120167220 | G | A | -0.608 | 0.5435 | -- | 0      | 0.005 | 1 | 0.9448  |
| rs2156233   | 11 | 117584368 | T | C | 0.608  | 0.5435 | +? | 0      | 0     | 0 | 1       |
| rs58577143  | 11 | 118291210 | G | A | 0.608  | 0.5435 | ++ | 0      | 0.48  | 1 | 0.4882  |
| rs2044544   | 11 | 119744600 | T | C | 0.607  | 0.5436 | +? | 0      | 0     | 0 | 1       |
| rs11823300  | 11 | 120199080 | A | G | -0.607 | 0.5438 | -? | 0      | 0     | 0 | 1       |
| rs12576574  | 11 | 120898196 | T | G | -0.607 | 0.5438 | -? | 0      | 0     | 0 | 1       |
| rs12790943  | 11 | 120058623 | T | C | -0.607 | 0.5438 | -- | 0      | 0.163 | 1 | 0.6862  |
| rs12791292  | 11 | 120058640 | C | G | -0.607 | 0.5438 | -- | 0      | 0.163 | 1 | 0.6862  |
| rs947988    | 11 | 116528983 | C | G | 0.607  | 0.5438 | +? | 0      | 0     | 0 | 1       |
| rs1145210   | 11 | 116559002 | T | C | -0.607 | 0.5439 | -? | 0      | 0     | 0 | 1       |
| rs581491    | 11 | 119880792 | C | T | -0.607 | 0.5439 | -? | 0      | 0     | 0 | 1       |
| rs7928408   | 11 | 117593985 | T | C | 0.607  | 0.5439 | +? | 0      | 0     | 0 | 1       |
| rs78342015  | 11 | 118298428 | T | C | 0.607  | 0.5441 | +- | -7.7   | 2.786 | 1 | 0.09507 |
| rs10892482  | 11 | 119742989 | C | T | 0.606  | 0.5442 | +? | 0      | 0     | 0 | 1       |
| rs4142654   | 11 | 120167057 | G | A | -0.606 | 0.5443 | -- | 0      | 0.005 | 1 | 0.9453  |
| rs498889    | 11 | 117459662 | C | T | 0.606  | 0.5443 | +? | 0      | 0     | 0 | 1       |
| rs4938808   | 11 | 120336902 | T | G | -0.606 | 0.5445 | -? | 0      | 0     | 0 | 1       |
| rs629060    | 11 | 117581772 | G | T | 0.606  | 0.5447 | +? | 0      | 0     | 0 | 1       |
| rs6589619   | 11 | 117582263 | T | C | 0.606  | 0.5447 | +? | 0      | 0     | 0 | 1       |
| rs948777    | 11 | 117582054 | C | T | 0.606  | 0.5447 | +? | 0      | 0     | 0 | 1       |
| rs10892616  | 11 | 120559070 | G | A | 0.605  | 0.5449 | +? | 0      | 0     | 0 | 1       |
| rs12294046  | 11 | 120558487 | T | A | 0.605  | 0.5449 | +? | 0      | 0     | 0 | 1       |

|             |    |           |   |   |        |        |   |       |       |   |         |
|-------------|----|-----------|---|---|--------|--------|---|-------|-------|---|---------|
| rs2075647   | 11 | 118037964 | C | G | 0.605  | 0.5449 | + | 0     | 0     | 0 | 1       |
| rs12281001  | 11 | 120558364 | T | G | 0.605  | 0.545  | + | 0     | 0     | 0 | 1       |
| rs619250    | 11 | 118064582 | A | T | 0.605  | 0.545  | + | 0     | 0     | 0 | 1       |
| rs10892361  | 11 | 119269081 | G | A | 0.605  | 0.5453 | - | -58.5 | 1.892 | 1 | 0.1689  |
| rs149668068 | 11 | 118099735 | A | G | 0.605  | 0.5453 | - | 0     | 0.868 | 1 | 0.3515  |
| rs6589856   | 11 | 120954911 | A | T | -0.605 | 0.5453 | - | 0     | 0     | 0 | 1       |
| rs17124538  | 11 | 120783369 | G | A | -0.605 | 0.5454 | - | 0     | 0     | 0 | 1       |
| rs72995858  | 11 | 120649949 | T | C | 0.605  | 0.5454 | + | 0     | 0     | 0 | 1       |
| rs10892210  | 11 | 117956338 | T | G | 0.604  | 0.5455 | - | 0     | 0.237 | 1 | 0.6264  |
| rs11217669  | 11 | 119938625 | A | G | 0.604  | 0.5456 | + | 0     | 0     | 0 | 1       |
| rs61899022  | 11 | 119802948 | A | G | -0.604 | 0.5456 | - | 0     | 0     | 0 | 1       |
| rs111255936 | 11 | 116710993 | T | C | 0.604  | 0.5457 | + | 0     | 0     | 0 | 1       |
| rs4935750   | 11 | 120521066 | C | T | -0.604 | 0.5457 | - | 0     | 0     | 0 | 1       |
| rs2509668   | 11 | 119361345 | G | A | 0.604  | 0.5458 | + | 0     | 0     | 0 | 1       |
| rs869005    | 11 | 117614796 | T | C | 0.604  | 0.5459 | + | 0     | 0     | 0 | 1       |
| rs609332    | 11 | 117175158 | G | C | 0.604  | 0.5461 | + | 0     | 0     | 0 | 1       |
| rs6589832   | 11 | 120559480 | G | A | -0.604 | 0.5461 | - | 0     | 0     | 0 | 1       |
| rs496034    | 11 | 120322079 | A | G | 0.603  | 0.5463 | + | 0     | 0     | 0 | 1       |
| rs1263057   | 11 | 116575754 | T | C | -0.603 | 0.5464 | - | 0     | 0     | 0 | 1       |
| rs7124930   | 11 | 120687529 | C | T | 0.603  | 0.5468 | + | 0     | 0     | 0 | 1       |
| rs10891996  | 11 | 116457340 | A | G | 0.602  | 0.5469 | + | 0     | 0     | 0 | 1       |
| rs2510873   | 11 | 116243868 | G | A | -0.602 | 0.5469 | - | 0     | 0     | 0 | 1       |
| rs658274    | 11 | 117542353 | G | A | -0.602 | 0.5469 | - | 0     | 0     | 0 | 1       |
| rs10892209  | 11 | 117956263 | T | C | 0.602  | 0.547  | - | 0     | 0.241 | 1 | 0.6236  |
| rs11600226  | 11 | 117690423 | C | T | 0.602  | 0.547  | + | 0     | 0     | 0 | 1       |
| rs11216140  | 11 | 116672013 | T | C | -0.602 | 0.5474 | - | -35.5 | 2.214 | 1 | 0.1368  |
| rs35574604  | 11 | 119361057 | A | G | 0.601  | 0.5477 | + | 0     | 0     | 0 | 1       |
| rs4245204   | 11 | 119580472 | A | G | 0.601  | 0.5477 | + | 0     | 0     | 0 | 1       |
| rs4938478   | 11 | 117956943 | G | A | 0.601  | 0.5479 | - | 0     | 0.303 | 1 | 0.5818  |
| rs550791    | 11 | 116322819 | T | C | 0.601  | 0.5479 | + | 0     | 0     | 0 | 1       |
| rs10892202  | 11 | 117857338 | C | G | 0.601  | 0.548  | + | 0     | 0.089 | 1 | 0.7654  |
| rs519390    | 11 | 116238815 | C | T | -0.601 | 0.548  | - | 44.5  | 5.406 | 1 | 0.02007 |
| rs10750173  | 11 | 120288368 | C | T | -0.601 | 0.5481 | - | 0     | 0     | 0 | 1       |
| rs1242696   | 11 | 117217391 | T | G | 0.601  | 0.5481 | + | 0     | 0     | 0 | 1       |
| rs3017231   | 11 | 116560948 | A | G | -0.601 | 0.5481 | - | 0     | 0     | 0 | 1       |
| rs11218140  | 11 | 120968162 | A | G | -0.6   | 0.5482 | - | 0     | 0     | 0 | 1       |
| rs3934628   | 11 | 120707644 | T | C | 0.6    | 0.5482 | + | 0     | 0     | 0 | 1       |
| rs58254802  | 11 | 120120523 | T | G | -0.6   | 0.5482 | - | 0     | 0     | 0 | 1       |
| rs60758080  | 11 | 120120435 | A | G | -0.6   | 0.5482 | - | 0     | 0     | 0 | 1       |
| rs79475413  | 11 | 119666800 | A | G | 0.6    | 0.5484 | + | 0     | 0     | 0 | 1       |
| rs67514601  | 11 | 118189477 | G | A | -0.6   | 0.5487 | - | 0     | 0.556 | 1 | 0.4558  |
| rs79831199  | 11 | 116236334 | A | C | -0.6   | 0.5488 | - | 0     | 0.192 | 1 | 0.6616  |
| rs34708086  | 11 | 119331254 | C | G | -0.599 | 0.5489 | - | 0     | 0     | 0 | 1       |
| rs73011181  | 11 | 116464824 | T | A | -0.599 | 0.5491 | - | 0     | 0     | 0 | 1       |
| rs10892232  | 11 | 118146884 | T | A | 0.599  | 0.5492 | - | 11.5  | 3.39  | 1 | 0.06558 |
| rs10892438  | 11 | 119579346 | T | A | -0.599 | 0.5492 | - | 0     | 0     | 0 | 1       |
| rs11606357  | 11 | 118878222 | C | T | -0.599 | 0.5492 | - | 0     | 0.017 | 1 | 0.8948  |
| rs34573317  | 11 | 117342672 | C | T | 0.599  | 0.5492 | + | 0     | 0     | 0 | 1       |
| rs59814528  | 11 | 119634962 | C | T | -0.599 | 0.5492 | - | 0     | 0     | 0 | 1       |
| rs3132781   | 11 | 120621358 | A | G | -0.599 | 0.5495 | - | 0     | 0     | 0 | 1       |
| rs12287882  | 11 | 120558338 | C | T | 0.598  | 0.5496 | + | 0     | 0     | 0 | 1       |
| rs2238006   | 11 | 117087792 | C | A | -0.598 | 0.5498 | - | 0     | 0     | 0 | 1       |
| rs34198109  | 11 | 119332549 | G | C | -0.598 | 0.5501 | - | 0     | 0     | 0 | 1       |
| rs7930786   | 11 | 116624727 | C | G | -0.597 | 0.5502 | - | -61.4 | 1.859 | 1 | 0.1728  |
| rs480053    | 11 | 116314419 | A | G | 0.597  | 0.5505 | + | 0     | 0     | 0 | 1       |
| rs11217552  | 11 | 119750091 | T | C | 0.597  | 0.5507 | + | 0     | 0     | 0 | 1       |

|              |    |           |   |   |        |        |    |        |       |   |         |
|--------------|----|-----------|---|---|--------|--------|----|--------|-------|---|---------|
| rs73022413   | 11 | 117787228 | C | T | 0.597  | 0.5507 | +  | 0      | 0     | 0 | 1       |
| rs17092642   | 11 | 116557248 | C | T | -0.596 | 0.5509 | -  | 0      | 0     | 0 | 1       |
| rs1079071    | 11 | 120628922 | C | T | 0.596  | 0.551  | +  | 0      | 0     | 0 | 1       |
| rs948404     | 11 | 120150533 | A | G | -0.596 | 0.551  | -  | 0      | 0     | 0 | 1       |
| rs11216403   | 11 | 117333214 | C | T | -0.596 | 0.5511 | -  | 0      | 0     | 0 | 1       |
| rs3017230    | 11 | 116560961 | C | G | -0.596 | 0.5511 | -  | 0      | 0     | 0 | 1       |
| rs4936499    | 11 | 119682612 | C | T | 0.596  | 0.5512 | ++ | 0      | 0.007 | 1 | 0.9326  |
| rs118188470  | 11 | 119692025 | C | G | 0.596  | 0.5513 | ++ | 0      | 0.047 | 1 | 0.8292  |
| rs7105363    | 11 | 120687069 | T | G | 0.596  | 0.5515 | +  | 0      | 0     | 0 | 1       |
| rs55768116   | 11 | 118108331 | A | C | 0.595  | 0.5516 | +  | 0      | 0     | 0 | 1       |
| rs4252253    | 11 | 117859925 | A | C | 0.595  | 0.5517 | +- | -191.8 | 1.028 | 1 | 0.3106  |
| rs4938436    | 11 | 117594591 | G | A | 0.595  | 0.5519 | +  | 0      | 0     | 0 | 1       |
| rs74940535   | 11 | 120182487 | C | G | -0.595 | 0.5519 | -  | 0      | 0     | 0 | 1       |
| rs518863     | 11 | 120053300 | T | C | 0.595  | 0.552  | +  | 0      | 0     | 0 | 1       |
| rs56754533   | 11 | 118188276 | A | G | -0.594 | 0.5525 | +- | -140.7 | 1.247 | 1 | 0.2642  |
| rs4252287    | 11 | 117868638 | A | G | 0.594  | 0.5526 | +- | 0      | 0.297 | 1 | 0.586   |
| rs10790365   | 11 | 119945567 | T | C | -0.594 | 0.5527 | -  | 0      | 0     | 0 | 1       |
| rs12279889   | 11 | 121119712 | T | C | 0.594  | 0.5528 | +  | 0      | 0     | 0 | 1       |
| rs11217586   | 11 | 119805109 | A | G | -0.593 | 0.553  | -  | 0      | 0     | 0 | 1       |
| rs10790203   | 11 | 117610387 | G | A | 0.593  | 0.5531 | +  | 0      | 0     | 0 | 1       |
| rs4936405    | 11 | 117611495 | G | A | 0.593  | 0.5531 | +  | 0      | 0     | 0 | 1       |
| rs56125819   | 11 | 116961617 | A | G | -0.593 | 0.5531 | +- | 48.8   | 5.86  | 1 | 0.01548 |
| rs61244196   | 11 | 116961510 | A | G | -0.593 | 0.5531 | +- | 48.8   | 5.86  | 1 | 0.01548 |
| rs2166658    | 11 | 119682874 | T | C | 0.593  | 0.5533 | ++ | 0      | 0.008 | 1 | 0.9296  |
| rs3882897    | 11 | 117091227 | A | G | -0.593 | 0.5533 | -  | 0      | 0     | 0 | 1       |
| rs11216920   | 11 | 118462554 | G | A | 0.593  | 0.5534 | +- | 0      | 0.274 | 1 | 0.6004  |
| rs10892124   | 11 | 117354818 | G | C | 0.592  | 0.5536 | +  | 0      | 0     | 0 | 1       |
| rs1309012690 | 11 | 119166047 | A | G | 0.592  | 0.5536 | ++ | 0      | 0.363 | 1 | 0.5469  |
| rs12790242   | 11 | 117842292 | A | G | 0.592  | 0.5537 | ++ | 0      | 0.012 | 1 | 0.9138  |
| rs7107887    | 11 | 117585714 | A | C | 0.592  | 0.5539 | +  | 0      | 0     | 0 | 1       |
| rs61904848   | 11 | 116454342 | C | A | 0.592  | 0.554  | +  | 0      | 0     | 0 | 1       |
| rs117273824  | 11 | 117458169 | T | C | 0.591  | 0.5542 | +  | 0      | 0     | 0 | 1       |
| rs1829       | 11 | 120981408 | T | C | 0.591  | 0.5542 | +- | -147.8 | 1.211 | 1 | 0.2712  |
| rs77080891   | 11 | 121040073 | A | G | -0.591 | 0.5543 | -  | 0      | 0     | 0 | 1       |
| rs948025     | 11 | 120679052 | T | G | 0.591  | 0.5543 | +  | 0      | 0     | 0 | 1       |
| rs10502225   | 11 | 116939724 | T | A | -0.591 | 0.5544 | +- | 48.9   | 5.866 | 1 | 0.01544 |
| rs10750091   | 11 | 116296641 | A | G | -0.591 | 0.5544 | -  | 0      | 0     | 0 | 1       |
| rs111426457  | 11 | 116931087 | G | C | -0.591 | 0.5544 | +- | 48.9   | 5.866 | 1 | 0.01544 |
| rs111641976  | 11 | 116941382 | A | G | -0.591 | 0.5544 | +- | 48.9   | 5.866 | 1 | 0.01544 |
| rs1982679    | 11 | 116936488 | A | G | -0.591 | 0.5544 | +- | 48.9   | 5.866 | 1 | 0.01544 |
| rs56188860   | 11 | 116948173 | A | T | -0.591 | 0.5544 | +- | 48.9   | 5.866 | 1 | 0.01544 |
| rs57787606   | 11 | 116942479 | A | G | -0.591 | 0.5544 | +- | 48.9   | 5.866 | 1 | 0.01544 |
| rs59752757   | 11 | 116950278 | C | A | -0.591 | 0.5544 | +- | 48.9   | 5.866 | 1 | 0.01544 |
| rs7108830    | 11 | 116948761 | A | G | -0.591 | 0.5544 | +- | 48.9   | 5.866 | 1 | 0.01544 |
| rs7121475    | 11 | 116951615 | A | G | -0.591 | 0.5544 | +- | 48.9   | 5.866 | 1 | 0.01544 |
| rs73576634   | 11 | 116944304 | T | G | -0.591 | 0.5544 | +- | 48.9   | 5.866 | 1 | 0.01544 |
| rs73576637   | 11 | 116945074 | G | A | -0.591 | 0.5544 | +- | 48.9   | 5.866 | 1 | 0.01544 |
| rs73576652   | 11 | 116950567 | A | G | -0.591 | 0.5544 | +- | 48.9   | 5.866 | 1 | 0.01544 |
| rs73576656   | 11 | 116953604 | T | C | -0.591 | 0.5544 | +- | 48.9   | 5.866 | 1 | 0.01544 |
| rs73576658   | 11 | 116953784 | A | G | -0.591 | 0.5544 | +- | 48.9   | 5.866 | 1 | 0.01544 |
| rs7946101    | 11 | 116934869 | A | G | -0.591 | 0.5544 | +- | 48.9   | 5.866 | 1 | 0.01544 |
| rs7123666    | 11 | 116667083 | A | G | -0.591 | 0.5545 | +- | -154   | 1.181 | 1 | 0.2772  |
| rs12576572   | 11 | 120922228 | T | G | -0.591 | 0.5546 | -  | 0      | 0     | 0 | 1       |
| rs3758891    | 11 | 120929197 | A | G | -0.591 | 0.5546 | -  | 0      | 0     | 0 | 1       |
| rs57826163   | 11 | 120933051 | T | G | -0.591 | 0.5546 | -  | 0      | 0     | 0 | 1       |
| rs7947565    | 11 | 120927469 | T | G | -0.591 | 0.5546 | -  | 0      | 0     | 0 | 1       |

|             |    |           |   |   |        |        |    |       |       |   |         |
|-------------|----|-----------|---|---|--------|--------|----|-------|-------|---|---------|
| rs111537986 | 11 | 117763500 | T | C | 0.591  | 0.5547 | +? | 0     | 0     | 0 | 1       |
| rs17120197  | 11 | 116845104 | C | T | 0.591  | 0.5548 | +? | 0     | 0     | 0 | 1       |
| rs1787028   | 11 | 119964758 | G | C | 0.591  | 0.5548 | +? | 0     | 0     | 0 | 1       |
| rs525302    | 11 | 116762583 | C | G | -0.591 | 0.5548 | -? | 0     | 0     | 0 | 1       |
| rs11217461  | 11 | 119622391 | A | G | -0.59  | 0.555  | -? | 0     | 0     | 0 | 1       |
| rs59873384  | 11 | 116576210 | T | C | -0.59  | 0.555  | -- | 0     | 0     | 1 | 0.9974  |
| rs10892466  | 11 | 119661317 | C | G | 0.59   | 0.5551 | ++ | 0     | 0     | 1 | 0.9878  |
| rs3132782   | 11 | 120622656 | A | G | -0.59  | 0.5551 | -? | 0     | 0     | 0 | 1       |
| rs4935755   | 11 | 120735982 | T | C | 0.59   | 0.5551 | +? | 0     | 0     | 0 | 1       |
| rs470725    | 11 | 119997599 | T | C | 0.59   | 0.5552 | +? | 0     | 0     | 0 | 1       |
| rs11217520  | 11 | 119686250 | A | G | 0.59   | 0.5553 | ++ | 0     | 0.008 | 1 | 0.9299  |
| rs12575628  | 11 | 121020150 | T | C | -0.59  | 0.5553 | -? | 0     | 0     | 0 | 1       |
| rs4936501   | 11 | 119685493 | A | G | 0.59   | 0.5553 | ++ | 0     | 0.008 | 1 | 0.9299  |
| rs4936502   | 11 | 119685596 | T | C | 0.59   | 0.5553 | ++ | 0     | 0.008 | 1 | 0.9299  |
| rs501433    | 11 | 116293739 | T | C | -0.59  | 0.5554 | -? | 0     | 0     | 0 | 1       |
| rs114428118 | 11 | 120564627 | T | G | 0.589  | 0.5557 | +? | 0     | 0     | 0 | 1       |
| rs3133865   | 11 | 120623605 | A | C | -0.589 | 0.5558 | -? | 0     | 0     | 0 | 1       |
| rs4938790   | 11 | 120054202 | T | C | 0.589  | 0.5559 | +? | 0     | 0     | 0 | 1       |
| rs10892574  | 11 | 120288944 | C | G | -0.589 | 0.556  | -? | 0     | 0     | 0 | 1       |
| rs61898298  | 11 | 120119848 | T | G | -0.589 | 0.5561 | -? | 0     | 0     | 0 | 1       |
| rs11216549  | 11 | 117668104 | G | C | -0.588 | 0.5562 | -? | 0     | 0     | 0 | 1       |
| rs61593876  | 11 | 116450579 | C | T | 0.588  | 0.5562 | ++ | 0     | 0.024 | 1 | 0.8775  |
| rs141752759 | 11 | 118194647 | G | C | 0.588  | 0.5563 | ++ | 0     | 0.462 | 1 | 0.4969  |
| rs79700393  | 11 | 117551222 | A | G | 0.588  | 0.5563 | +? | 0     | 0     | 0 | 1       |
| rs1790471   | 11 | 119968219 | T | C | 0.588  | 0.5564 | +? | 0     | 0     | 0 | 1       |
| rs2854116   | 11 | 116700169 | C | T | -0.588 | 0.5564 | -? | 0     | 0     | 0 | 1       |
| rs78484152  | 11 | 119657893 | A | G | 0.588  | 0.5564 | ++ | 0     | 0     | 1 | 0.9836  |
| rs4367956   | 11 | 119490921 | A | C | 0.588  | 0.5566 | +? | 0     | 0     | 0 | 1       |
| rs12576376  | 11 | 116225239 | T | C | 0.588  | 0.5567 | +- | -73   | 1.734 | 1 | 0.1879  |
| rs2186601   | 11 | 120955028 | T | C | -0.588 | 0.5567 | -? | 0     | 0     | 0 | 1       |
| rs4936500   | 11 | 119682703 | G | C | 0.588  | 0.5567 | ++ | 0     | 0.008 | 1 | 0.9289  |
| rs7104999   | 11 | 120686999 | G | C | 0.588  | 0.5568 | +? | 0     | 0     | 0 | 1       |
| rs78062662  | 11 | 116482573 | T | C | -0.588 | 0.5568 | -? | 0     | 0     | 0 | 1       |
| rs2852224   | 11 | 120619202 | T | C | 0.587  | 0.5569 | +? | 0     | 0     | 0 | 1       |
| rs12806754  | 11 | 119784889 | A | G | -0.587 | 0.557  | -? | 0     | 0     | 0 | 1       |
| rs12575073  | 11 | 121188747 | T | C | -0.587 | 0.5571 | -? | 0     | 0     | 0 | 1       |
| rs3017228   | 11 | 116560992 | G | A | -0.587 | 0.5572 | -? | 0     | 0     | 0 | 1       |
| rs11216781  | 11 | 118012310 | A | G | -0.587 | 0.5573 | +- | 0     | 0.119 | 1 | 0.7299  |
| rs11217521  | 11 | 119686328 | C | T | 0.587  | 0.5573 | ++ | 0     | 0.008 | 1 | 0.9285  |
| rs34570367  | 11 | 117991116 | G | A | 0.587  | 0.5573 | +- | 0     | 0.44  | 1 | 0.5073  |
| rs35676325  | 11 | 119686548 | A | G | 0.587  | 0.5573 | ++ | 0     | 0.008 | 1 | 0.9285  |
| rs653106    | 11 | 119357305 | G | A | -0.587 | 0.5573 | -? | 0     | 0     | 0 | 1       |
| rs79280888  | 11 | 116560529 | G | A | -0.587 | 0.5573 | -? | 0     | 0     | 0 | 1       |
| rs11216500  | 11 | 117555150 | C | T | 0.586  | 0.5577 | +? | 0     | 0     | 0 | 1       |
| rs75964569  | 11 | 119853613 | C | T | -0.586 | 0.5578 | -? | 0     | 0     | 0 | 1       |
| rs2277288   | 11 | 117782638 | G | A | 0.586  | 0.5579 | +? | 0     | 0     | 0 | 1       |
| rs118138924 | 11 | 116803634 | G | C | 0.586  | 0.5581 | +? | 0     | 0     | 0 | 1       |
| rs547919    | 11 | 116800154 | T | A | -0.586 | 0.5581 | +- | 49    | 5.881 | 1 | 0.0153  |
| rs7119690   | 11 | 119656902 | G | A | -0.586 | 0.5581 | -? | 0     | 0     | 0 | 1       |
| rs3133224   | 11 | 120614787 | T | C | -0.586 | 0.5582 | -? | 0     | 0     | 0 | 1       |
| rs7105286   | 11 | 120687234 | G | A | 0.586  | 0.5582 | +? | 0     | 0     | 0 | 1       |
| rs7926015   | 11 | 119261867 | T | G | 0.586  | 0.5582 | +- | -57.7 | 1.902 | 1 | 0.1678  |
| rs11601508  | 11 | 118178757 | A | G | 0.585  | 0.5583 | +- | 21.3  | 3.813 | 1 | 0.05087 |
| rs12576759  | 11 | 120898253 | T | C | -0.585 | 0.5585 | -? | 0     | 0     | 0 | 1       |
| rs11217587  | 11 | 119809217 | C | T | -0.585 | 0.5587 | -? | 0     | 0     | 0 | 1       |
| rs11218123  | 11 | 120899492 | T | G | -0.585 | 0.5587 | -? | 0     | 0     | 0 | 1       |

|              |    |           |   |   |        |        |     |        |       |   |         |
|--------------|----|-----------|---|---|--------|--------|-----|--------|-------|---|---------|
| rs35004487   | 11 | 116631542 | C | G | -0.585 | 0.5587 | -?  | 0      | 0     | 0 | 1       |
| rs606916     | 11 | 120982105 | G | C | 0.585  | 0.5587 | +-- | -148.3 | 1.208 | 1 | 0.2717  |
| rs1202587279 | 11 | 116299004 | T | C | 0.584  | 0.559  | +?  | 0      | 0     | 0 | 1       |
| rs12283240   | 11 | 120559953 | A | G | 0.584  | 0.559  | +?  | 0      | 0     | 0 | 1       |
| rs948690     | 11 | 116529468 | C | T | -0.584 | 0.5591 | -?  | 0      | 0     | 0 | 1       |
| rs609066     | 11 | 119879255 | G | A | -0.584 | 0.5592 | -?  | 0      | 0     | 0 | 1       |
| rs475422     | 11 | 117431708 | C | T | 0.584  | 0.5593 | +?  | 0      | 0     | 0 | 1       |
| rs35059164   | 11 | 119686554 | G | A | 0.584  | 0.5594 | ++  | 0      | 0.008 | 1 | 0.927   |
| rs57903286   | 11 | 116417966 | T | C | 0.584  | 0.5596 | ++  | 0      | 0.33  | 1 | 0.5659  |
| rs3181261    | 11 | 118212671 | T | C | -0.583 | 0.5597 | -?  | 0      | 0     | 0 | 1       |
| rs73003745   | 11 | 120703464 | A | G | 0.583  | 0.5597 | +?  | 0      | 0     | 0 | 1       |
| rs7129335    | 11 | 121107473 | A | T | -0.583 | 0.5598 | -?  | 0      | 0     | 0 | 1       |
| rs180364     | 11 | 116596752 | G | A | -0.583 | 0.5599 | +-  | 0      | 0.151 | 1 | 0.6974  |
| rs34937367   | 11 | 116560524 | C | T | -0.583 | 0.5599 | -?  | 0      | 0     | 0 | 1       |
| rs11218222   | 11 | 121112467 | G | C | 0.583  | 0.5601 | +?  | 0      | 0     | 0 | 1       |
| rs4936403    | 11 | 117606193 | G | T | 0.582  | 0.5603 | +?  | 0      | 0     | 0 | 1       |
| rs948024     | 11 | 120679042 | T | A | 0.582  | 0.5604 | +?  | 0      | 0     | 0 | 1       |
| rs10892445   | 11 | 119607933 | G | A | 0.582  | 0.5605 | +?  | 0      | 0     | 0 | 1       |
| rs117684324  | 11 | 116577971 | T | A | -0.582 | 0.5605 | --  | 0      | 0     | 1 | 0.9989  |
| rs61901232   | 11 | 121093389 | T | C | -0.582 | 0.5605 | -?  | 0      | 0     | 0 | 1       |
| rs4936404    | 11 | 117606320 | G | A | 0.582  | 0.5606 | +?  | 0      | 0     | 0 | 1       |
| rs72994672   | 11 | 119844641 | G | T | -0.582 | 0.5607 | -?  | 0      | 0     | 0 | 1       |
| rs10892512   | 11 | 119878901 | A | G | -0.582 | 0.5608 | -?  | 0      | 0     | 0 | 1       |
| rs6589813    | 11 | 120293490 | G | A | -0.582 | 0.5608 | -?  | 0      | 0     | 0 | 1       |
| rs4938726    | 11 | 119681110 | T | C | 0.582  | 0.5609 | ++  | 0      | 0.009 | 1 | 0.9261  |
| rs634406     | 11 | 117460123 | G | C | 0.581  | 0.561  | +?  | 0      | 0     | 0 | 1       |
| rs4936505    | 11 | 119740612 | T | C | 0.581  | 0.5611 | +?  | 0      | 0     | 0 | 1       |
| rs3759009    | 11 | 118173850 | A | G | -0.581 | 0.5615 | +-  | -7.1   | 2.8   | 1 | 0.09423 |
| rs117388325  | 11 | 120236793 | T | C | -0.58  | 0.5617 | -?  | 0      | 0     | 0 | 1       |
| rs9332852    | 11 | 118381069 | T | C | -0.58  | 0.5618 | +-  | -191.3 | 1.03  | 1 | 0.3102  |
| rs1573880    | 11 | 120465556 | T | C | -0.58  | 0.5619 | -?  | 0      | 0     | 0 | 1       |
| rs2006949    | 11 | 119575104 | C | T | -0.58  | 0.5619 | -?  | 0      | 0     | 0 | 1       |
| rs10892613   | 11 | 120558084 | A | G | 0.58   | 0.5622 | +?  | 0      | 0     | 0 | 1       |
| rs10892614   | 11 | 120558136 | G | T | 0.58   | 0.5622 | +?  | 0      | 0     | 0 | 1       |
| rs10892615   | 11 | 120558143 | T | A | 0.58   | 0.5622 | +?  | 0      | 0     | 0 | 1       |
| rs11216054   | 11 | 116498951 | C | T | 0.58   | 0.5622 | +?  | 0      | 0     | 0 | 1       |
| rs12286467   | 11 | 120558155 | G | T | 0.58   | 0.5622 | +?  | 0      | 0     | 0 | 1       |
| rs59818386   | 11 | 116320603 | A | G | 0.58   | 0.5622 | +?  | 0      | 0     | 0 | 1       |
| rs73594168   | 11 | 116899414 | T | C | -0.579 | 0.5626 | +-  | 49.2   | 5.9   | 1 | 0.01514 |
| rs73594169   | 11 | 116899617 | T | C | -0.579 | 0.5626 | +-  | 49.2   | 5.9   | 1 | 0.01514 |
| rs2003013    | 11 | 116372575 | A | G | -0.579 | 0.5627 | -?  | 0      | 0     | 0 | 1       |
| rs1145195    | 11 | 116571250 | A | G | 0.579  | 0.5628 | +?  | 0      | 0     | 0 | 1       |
| rs1941453    | 11 | 119331500 | T | C | -0.579 | 0.5628 | -?  | 0      | 0     | 0 | 1       |
| rs541586     | 11 | 116729196 | C | T | -0.579 | 0.5628 | +-  | 29.7   | 4.269 | 1 | 0.0388  |
| rs7115168    | 11 | 120737184 | G | A | 0.579  | 0.5629 | +?  | 0      | 0     | 0 | 1       |
| rs524929     | 11 | 116260862 | G | A | 0.578  | 0.5633 | +?  | 0      | 0     | 0 | 1       |
| rs17124937   | 11 | 121065198 | C | G | -0.578 | 0.5635 | -?  | 0      | 0     | 0 | 1       |
| rs1787023    | 11 | 119903704 | T | C | -0.578 | 0.5635 | -?  | 0      | 0     | 0 | 1       |
| rs11217365   | 11 | 119501085 | C | T | 0.577  | 0.5637 | +?  | 0      | 0     | 0 | 1       |
| rs7129597    | 11 | 117555933 | T | C | 0.577  | 0.5637 | +?  | 0      | 0     | 0 | 1       |
| rs61903663   | 11 | 117133242 | C | T | 0.577  | 0.5639 | +?  | 0      | 0     | 0 | 1       |
| rs11216662   | 11 | 117848129 | C | A | -0.577 | 0.564  | --  | 0      | 0.534 | 1 | 0.465   |
| rs1567378    | 11 | 119480880 | G | A | 0.577  | 0.5642 | +?  | 0      | 0     | 0 | 1       |
| rs11216982   | 11 | 118590864 | A | G | -0.576 | 0.5643 | -?  | 0      | 0     | 0 | 1       |
| rs1245791313 | 11 | 120703432 | G | A | 0.576  | 0.5643 | +?  | 0      | 0     | 0 | 1       |
| rs2212641    | 11 | 120191828 | C | T | 0.576  | 0.5644 | +?  | 0      | 0     | 0 | 1       |

|             |    |           |   |   |        |        |     |        |       |   |         |
|-------------|----|-----------|---|---|--------|--------|-----|--------|-------|---|---------|
| rs571025    | 11 | 116292614 | T | C | -0.576 | 0.5646 | -?  | 0      | 0     | 0 | 1       |
| rs602716    | 11 | 118801235 | A | G | 0.576  | 0.5647 | -+  | -100.1 | 1.499 | 1 | 0.2208  |
| rs10790141  | 11 | 116296520 | A | G | -0.576 | 0.5648 | -?  | 0      | 0     | 0 | 1       |
| rs550646    | 11 | 116314641 | A | G | 0.575  | 0.565  | +?  | 0      | 0     | 0 | 1       |
| rs57471964  | 11 | 117109155 | G | A | -0.575 | 0.565  | -?  | 0      | 0     | 0 | 1       |
| rs964184    | 11 | 116648917 | G | C | -0.575 | 0.565  | +-- | 16.1   | 3.575 | 1 | 0.05866 |
| rs139034795 | 11 | 120212377 | G | A | 0.575  | 0.5652 | +?  | 0      | 0     | 0 | 1       |
| rs73020457  | 11 | 117762694 | T | C | 0.575  | 0.5652 | +?  | 0      | 0     | 0 | 1       |
| rs505009    | 11 | 116293365 | A | G | -0.575 | 0.5654 | -?  | 0      | 0     | 0 | 1       |
| rs78435918  | 11 | 120566473 | G | A | 0.575  | 0.5655 | +?  | 0      | 0     | 0 | 1       |
| rs10892192  | 11 | 117763538 | T | C | 0.575  | 0.5656 | +?  | 0      | 0     | 0 | 1       |
| rs585533    | 11 | 117927961 | A | G | -0.575 | 0.5656 | -?  | 0      | 0     | 0 | 1       |
| rs118114248 | 11 | 120313999 | A | G | -0.574 | 0.5657 | -?  | 0      | 0     | 0 | 1       |
| rs663319    | 11 | 121007374 | G | A | -0.574 | 0.5657 | -?  | 0      | 0     | 0 | 1       |
| rs7116997   | 11 | 120060673 | C | T | -0.574 | 0.5657 | --  | 0      | 0.182 | 1 | 0.6695  |
| rs145433737 | 11 | 121117590 | A | G | 0.574  | 0.5658 | +?  | 0      | 0     | 0 | 1       |
| rs4936402   | 11 | 117600876 | C | T | 0.574  | 0.5658 | +?  | 0      | 0     | 0 | 1       |
| rs12798518  | 11 | 119971934 | A | G | -0.574 | 0.566  | -?  | 0      | 0     | 0 | 1       |
| rs1945011   | 11 | 120621602 | A | G | 0.574  | 0.566  | +?  | 0      | 0     | 0 | 1       |
| rs7928868   | 11 | 121165498 | A | G | 0.574  | 0.566  | +?  | 0      | 0     | 0 | 1       |
| rs2060008   | 11 | 121179847 | A | T | -0.574 | 0.5662 | -?  | 0      | 0     | 0 | 1       |
| rs3741298   | 11 | 116657561 | C | T | -0.574 | 0.5662 | +-- | 51.3   | 6.157 | 1 | 0.01309 |
| rs77873962  | 11 | 117199317 | T | C | -0.574 | 0.5662 | -?  | 0      | 0     | 0 | 1       |
| rs17120111  | 11 | 116744018 | T | C | 0.573  | 0.5664 | +?  | 0      | 0     | 0 | 1       |
| rs4938466   | 11 | 117845068 | G | A | 0.573  | 0.5664 | ++  | 0      | 0.003 | 1 | 0.9556  |
| rs7126172   | 11 | 118567257 | G | A | 0.573  | 0.5664 | ++  | 0      | 0.825 | 1 | 0.3638  |
| rs112933729 | 11 | 117246566 | A | G | -0.573 | 0.5667 | -?  | 0      | 0     | 0 | 1       |
| rs7104210   | 11 | 119073886 | G | T | 0.573  | 0.5667 | +?  | 0      | 0     | 0 | 1       |
| rs4631889   | 11 | 120494034 | A | G | 0.573  | 0.5668 | +?  | 0      | 0     | 0 | 1       |
| rs12278045  | 11 | 119796344 | A | G | -0.573 | 0.5669 | -?  | 0      | 0     | 0 | 1       |
| rs10750117  | 11 | 117762288 | G | C | 0.572  | 0.567  | +?  | 0      | 0     | 0 | 1       |
| rs11216470  | 11 | 117485422 | T | C | 0.572  | 0.567  | +?  | 0      | 0     | 0 | 1       |
| rs73022412  | 11 | 117787018 | C | T | 0.572  | 0.5671 | +?  | 0      | 0     | 0 | 1       |
| rs7112341   | 11 | 121110846 | A | T | -0.572 | 0.5673 | --  | 0      | 0.2   | 1 | 0.6545  |
| rs11216489  | 11 | 117535285 | A | G | 0.572  | 0.5674 | +?  | 0      | 0     | 0 | 1       |
| rs4489755   | 11 | 119605480 | T | G | 0.572  | 0.5676 | +?  | 0      | 0     | 0 | 1       |
| rs618923    | 11 | 116654159 | G | A | -0.572 | 0.5677 | -+  | 20.8   | 3.788 | 1 | 0.05163 |
| rs61900351  | 11 | 117801589 | A | T | 0.571  | 0.5678 | +?  | 0      | 0     | 0 | 1       |
| rs11217878  | 11 | 120340383 | A | G | 0.571  | 0.5679 | +?  | 0      | 0     | 0 | 1       |
| rs2276035   | 11 | 120346360 | A | G | 0.571  | 0.5679 | +?  | 0      | 0     | 0 | 1       |
| rs79022222  | 11 | 121021970 | T | C | -0.571 | 0.568  | -?  | 0      | 0     | 0 | 1       |
| rs11218007  | 11 | 120653294 | A | G | 0.571  | 0.5681 | +?  | 0      | 0     | 0 | 1       |
| rs56311339  | 11 | 116566161 | T | C | 0.571  | 0.5681 | +?  | 0      | 0     | 0 | 1       |
| rs948104    | 11 | 117596927 | G | T | 0.571  | 0.5681 | +?  | 0      | 0     | 0 | 1       |
| rs111750658 | 11 | 120695729 | C | G | 0.571  | 0.5683 | +?  | 0      | 0     | 0 | 1       |
| rs17120968  | 11 | 117493839 | T | C | 0.571  | 0.5683 | +?  | 0      | 0     | 0 | 1       |
| rs73020492  | 11 | 117775130 | A | C | 0.57   | 0.5684 | +?  | 0      | 0     | 0 | 1       |
| rs12806865  | 11 | 117404769 | G | A | 0.57   | 0.5685 | +?  | 0      | 0     | 0 | 1       |
| rs1632452   | 11 | 119967615 | C | T | 0.57   | 0.5685 | +?  | 0      | 0     | 0 | 1       |
| rs11823721  | 11 | 117772002 | C | T | 0.57   | 0.5686 | +?  | 0      | 0     | 0 | 1       |
| rs1241550   | 11 | 116726651 | C | T | -0.57  | 0.5686 | +-- | 28.7   | 4.207 | 1 | 0.04025 |
| rs61901402  | 11 | 120598054 | A | G | -0.57  | 0.5686 | --  | 0      | 0.774 | 1 | 0.3788  |
| rs633389    | 11 | 116667337 | T | C | 0.57   | 0.5686 | +-- | -42.3  | 2.109 | 1 | 0.1465  |
| rs551417    | 11 | 119742372 | T | C | -0.57  | 0.5687 | -?  | 0      | 0     | 0 | 1       |
| rs551662    | 11 | 117179003 | C | T | -0.57  | 0.5687 | -?  | 0      | 0     | 0 | 1       |
| rs9332857   | 11 | 118389440 | T | C | -0.57  | 0.569  | -+  | -191.5 | 1.029 | 1 | 0.3104  |

|             |    |           |   |   |        |        |    |       |       |   |         |
|-------------|----|-----------|---|---|--------|--------|----|-------|-------|---|---------|
| rs61904855  | 11 | 116476668 | A | C | -0.569 | 0.5691 | -? | 0     | 0     | 0 | 1       |
| rs1941408   | 11 | 120150430 | A | G | -0.569 | 0.5692 | -? | 0     | 0     | 0 | 1       |
| rs627995    | 11 | 118054324 | T | C | 0.569  | 0.5692 | +  | 0     | 0     | 0 | 1       |
| rs555179364 | 11 | 117218685 | C | T | 0.569  | 0.5696 | +  | 0     | 0     | 0 | 1       |
| rs79110667  | 11 | 121167114 | T | C | 0.568  | 0.5697 | +  | 0     | 0     | 0 | 1       |
| rs727422    | 11 | 121168178 | A | G | 0.568  | 0.5698 | +  | 0     | 0     | 0 | 1       |
| rs3863309   | 11 | 117293818 | C | T | 0.568  | 0.57   | +  | 0     | 0     | 0 | 1       |
| rs11217973  | 11 | 120553706 | T | C | 0.568  | 0.5701 | +  | 0     | 0     | 0 | 1       |
| rs7924573   | 11 | 119571342 | C | G | -0.568 | 0.5703 | -? | 0     | 0     | 0 | 1       |
| rs4372482   | 11 | 117839307 | C | T | 0.567  | 0.5709 | ++ | 0     | 0.001 | 1 | 0.9782  |
| rs12225989  | 11 | 120930947 | A | C | -0.567 | 0.571  | -? | 0     | 0     | 0 | 1       |
| rs1145193   | 11 | 116570942 | G | A | 0.566  | 0.5712 | +  | 0     | 0     | 0 | 1       |
| rs1145196   | 11 | 116572205 | T | C | 0.566  | 0.5713 | +  | 0     | 0     | 0 | 1       |
| rs7106851   | 11 | 118554259 | A | G | 0.566  | 0.5715 | ++ | 0     | 0.885 | 1 | 0.3468  |
| rs3830008   | 11 | 117093764 | C | A | -0.566 | 0.5716 | -? | 0     | 0     | 0 | 1       |
| rs11217693  | 11 | 119975273 | G | A | 0.566  | 0.5717 | +  | 0     | 0     | 0 | 1       |
| rs6589564   | 11 | 116624153 | C | G | -0.565 | 0.5718 | +- | -99.3 | 1.505 | 1 | 0.2198  |
| rs180865175 | 11 | 117250419 | G | T | 0.565  | 0.5719 | +  | 0     | 0     | 0 | 1       |
| rs478296    | 11 | 118567375 | C | T | 0.565  | 0.5719 | ++ | 0     | 0.914 | 1 | 0.3391  |
| rs12361100  | 11 | 121022231 | T | A | -0.565 | 0.572  | -? | 0     | 0     | 0 | 1       |
| rs1263499   | 11 | 117081709 | G | A | 0.565  | 0.5722 | +  | 0     | 0     | 0 | 1       |
| rs77130505  | 11 | 116448927 | T | C | 0.564  | 0.5725 | ++ | 0     | 0.028 | 1 | 0.8666  |
| rs896691    | 11 | 120048958 | C | A | 0.564  | 0.5725 | +  | 0     | 0     | 0 | 1       |
| rs11006     | 11 | 118895202 | G | A | -0.564 | 0.5726 | -- | 0     | 0.007 | 1 | 0.9321  |
| rs6589570   | 11 | 116675294 | A | T | 0.564  | 0.5726 | +  | 0     | 0     | 0 | 1       |
| rs7952366   | 11 | 119597943 | T | G | 0.564  | 0.5729 | +  | 0     | 0     | 0 | 1       |
| rs78659090  | 11 | 117558035 | G | A | 0.564  | 0.573  | +  | 0     | 0     | 0 | 1       |
| rs11217180  | 11 | 119072976 | T | C | 0.564  | 0.5731 | ++ | 0     | 0.393 | 1 | 0.5309  |
| rs578780    | 11 | 116288558 | T | C | -0.563 | 0.5731 | -? | 0     | 0     | 0 | 1       |
| rs11825655  | 11 | 117630867 | G | A | 0.563  | 0.5733 | +  | 0     | 0     | 0 | 1       |
| rs55728834  | 11 | 119682166 | C | T | 0.563  | 0.5733 | ++ | 0     | 0.008 | 1 | 0.9273  |
| rs10736502  | 11 | 119981785 | G | C | 0.563  | 0.5737 | +  | 0     | 0     | 0 | 1       |
| rs36088800  | 11 | 116223240 | C | T | 0.563  | 0.5737 | +- | -76.8 | 1.697 | 1 | 0.1927  |
| rs2156762   | 11 | 120624339 | C | T | 0.562  | 0.574  | +  | 0     | 0     | 0 | 1       |
| rs3016360   | 11 | 116559743 | C | T | -0.562 | 0.5741 | -? | 0     | 0     | 0 | 1       |
| rs2846114   | 11 | 120610144 | C | T | 0.562  | 0.5742 | +  | 0     | 0     | 0 | 1       |
| rs74341458  | 11 | 116751549 | A | G | 0.562  | 0.5742 | +  | 0     | 0     | 0 | 1       |
| rs61900350  | 11 | 117800481 | C | G | -0.562 | 0.5743 | -+ | 3.5   | 3.108 | 1 | 0.07792 |
| rs1145191   | 11 | 116570718 | G | C | 0.562  | 0.5744 | +  | 0     | 0     | 0 | 1       |
| rs1144036   | 11 | 116584421 | C | T | -0.561 | 0.5746 | -? | 0     | 0     | 0 | 1       |
| rs2155369   | 11 | 121038810 | T | C | -0.561 | 0.5746 | -? | 0     | 0     | 0 | 1       |
| rs6589802   | 11 | 119972011 | G | A | 0.561  | 0.5746 | +  | 0     | 0     | 0 | 1       |
| rs7396835   | 11 | 116684028 | T | C | 0.561  | 0.5747 | +  | 0     | 0     | 0 | 1       |
| rs3759002   | 11 | 118136160 | A | G | 0.561  | 0.5749 | -+ | -9.1  | 2.75  | 1 | 0.09725 |
| rs1939982   | 11 | 117605574 | G | A | 0.561  | 0.575  | +  | 0     | 0     | 0 | 1       |
| rs531260    | 11 | 120050515 | C | T | 0.56   | 0.5753 | +  | 0     | 0     | 0 | 1       |
| rs1240781   | 11 | 116574817 | T | C | 0.56   | 0.5756 | +  | 0     | 0     | 0 | 1       |
| rs12420005  | 11 | 119256303 | T | C | -0.56  | 0.5757 | -? | 0     | 0     | 0 | 1       |
| rs499744    | 11 | 117225033 | T | C | -0.56  | 0.5758 | -? | 0     | 0     | 0 | 1       |
| rs8192696   | 11 | 118895686 | T | C | -0.56  | 0.5758 | -- | 0     | 0.005 | 1 | 0.9423  |
| rs11216017  | 11 | 116451308 | G | C | 0.559  | 0.5759 | +  | 0     | 0     | 0 | 1       |
| rs78540725  | 11 | 119766827 | C | A | 0.559  | 0.5759 | +  | 0     | 0     | 0 | 1       |
| rs11217817  | 11 | 120191872 | G | C | 0.559  | 0.576  | +  | 0     | 0     | 0 | 1       |
| rs72994633  | 11 | 119824803 | C | T | 0.559  | 0.5763 | +  | 0     | 0     | 0 | 1       |
| rs7935369   | 11 | 119482594 | T | C | 0.559  | 0.5763 | +  | 0     | 0     | 0 | 1       |
| rs10790202  | 11 | 117597995 | C | A | 0.558  | 0.5766 | +  | 0     | 0     | 0 | 1       |

|              |    |           |   |   |        |        |    |       |       |   |         |
|--------------|----|-----------|---|---|--------|--------|----|-------|-------|---|---------|
| rs116324528  | 11 | 120633977 | T | A | 0.558  | 0.5766 | +  | 0     | 0     | 0 | 1       |
| rs12292959   | 11 | 116466714 | C | T | 0.558  | 0.5766 | +  | 0     | 0     | 0 | 1       |
| rs17120244   | 11 | 116919511 | T | C | -0.558 | 0.5766 | -  | 0     | 0     | 0 | 1       |
| rs61905717   | 11 | 116919208 | A | G | -0.558 | 0.5766 | -  | 0     | 0     | 0 | 1       |
| rs11216656   | 11 | 117838400 | A | G | 0.558  | 0.5771 | ++ | 0     | 0.023 | 1 | 0.8789  |
| rs483367     | 11 | 116297397 | T | C | -0.558 | 0.5771 | -  | 0     | 0     | 0 | 1       |
| rs12577176   | 11 | 116224822 | C | T | 0.558  | 0.5772 | +- | -77.6 | 1.689 | 1 | 0.1937  |
| rs4938751    | 11 | 119876939 | C | T | -0.557 | 0.5772 | -  | 0     | 0     | 0 | 1       |
| rs79820276   | 11 | 120356832 | G | A | -0.557 | 0.5773 | -  | 0     | 0     | 0 | 1       |
| rs10437694   | 11 | 121110312 | G | T | -0.557 | 0.5776 | -- | 0     | 0.207 | 1 | 0.6488  |
| rs1787715    | 11 | 116560325 | T | C | -0.557 | 0.5776 | -  | 0     | 0     | 0 | 1       |
| rs12418662   | 11 | 119596772 | C | T | 0.557  | 0.5778 | +  | 0     | 0     | 0 | 1       |
| rs59071712   | 11 | 117557224 | A | T | 0.557  | 0.5778 | +  | 0     | 0     | 0 | 1       |
| rs79489590   | 11 | 116791391 | T | C | 0.557  | 0.5778 | +  | 0     | 0     | 0 | 1       |
| rs644498     | 11 | 118567486 | C | T | 0.556  | 0.578  | ++ | 0     | 0.708 | 1 | 0.4002  |
| rs1003081    | 11 | 118913993 | T | C | 0.556  | 0.5781 | +  | 0     | 0     | 0 | 1       |
| rs12799630   | 11 | 116393611 | T | C | 0.556  | 0.5783 | +  | 0     | 0     | 0 | 1       |
| rs11604139   | 11 | 120480291 | A | T | 0.556  | 0.5784 | +  | 0     | 0     | 0 | 1       |
| rs2252359    | 11 | 120400149 | A | G | 0.556  | 0.5784 | +  | 0     | 0     | 0 | 1       |
| rs4423191    | 11 | 120752044 | G | T | -0.556 | 0.5784 | -  | 0     | 0     | 0 | 1       |
| rs145762171  | 11 | 118748789 | A | G | 0.556  | 0.5785 | +- | 0     | 0.614 | 1 | 0.4333  |
| rs150586315  | 11 | 120636195 | A | G | 0.555  | 0.5786 | +  | 0     | 0     | 0 | 1       |
| rs10892186   | 11 | 117729274 | A | G | -0.555 | 0.5788 | -  | 0     | 0     | 0 | 1       |
| rs493602     | 11 | 116297866 | C | G | -0.555 | 0.5788 | -  | 0     | 0     | 0 | 1       |
| rs12364542   | 11 | 116468132 | A | G | -0.555 | 0.5789 | -  | 0     | 0     | 0 | 1       |
| rs180740269  | 11 | 117183277 | T | C | -0.555 | 0.5789 | -  | 0     | 0     | 0 | 1       |
| rs111313044  | 11 | 118803596 | A | G | 0.555  | 0.579  | +- | -84.5 | 1.626 | 1 | 0.2022  |
| rs73575440   | 11 | 118803160 | A | G | 0.555  | 0.579  | +- | -84.5 | 1.626 | 1 | 0.2022  |
| rs10790150   | 11 | 116450713 | T | C | 0.555  | 0.5791 | +  | 0     | 0     | 0 | 1       |
| rs113111994  | 11 | 119876350 | T | G | 0.555  | 0.5791 | +  | 0     | 0     | 0 | 1       |
| rs1240770    | 11 | 116518438 | T | G | -0.555 | 0.5791 | -  | 0     | 0     | 0 | 1       |
| rs28990986   | 11 | 118963291 | T | C | -0.554 | 0.5793 | -  | 0     | 0     | 0 | 1       |
| rs10892720   | 11 | 121169193 | T | G | -0.554 | 0.5794 | -  | 0     | 0     | 0 | 1       |
| rs1025130228 | 11 | 120480136 | T | A | 0.554  | 0.5796 | +  | 0     | 0     | 0 | 1       |
| rs11601552   | 11 | 120480191 | A | C | 0.554  | 0.5796 | +  | 0     | 0     | 0 | 1       |
| rs2231450    | 11 | 118186312 | A | C | 0.554  | 0.5796 | +- | 19.9  | 3.746 | 1 | 0.05294 |
| rs2511846    | 11 | 119203939 | C | G | -0.554 | 0.5796 | -  | 0     | 0     | 0 | 1       |
| rs7941246    | 11 | 117646354 | G | T | 0.554  | 0.5797 | +  | 0     | 0     | 0 | 1       |
| rs509712     | 11 | 116728029 | G | A | -0.554 | 0.5798 | +- | 29.4  | 4.252 | 1 | 0.0392  |
| rs11216075   | 11 | 116524832 | A | G | -0.554 | 0.5799 | -  | 0     | 0     | 0 | 1       |
| rs11215991   | 11 | 116407867 | T | C | 0.553  | 0.5801 | +  | 0     | 0     | 0 | 1       |
| rs147834459  | 11 | 116325615 | T | C | 0.553  | 0.5804 | +  | 0     | 0     | 0 | 1       |
| rs2231441    | 11 | 118175540 | G | A | -0.553 | 0.5804 | -+ | -11.2 | 2.697 | 1 | 0.1005  |
| rs1039377879 | 11 | 118068100 | T | A | 0.553  | 0.5806 | +  | 0     | 0     | 0 | 1       |
| rs1240782    | 11 | 116574584 | A | G | 0.552  | 0.5809 | +  | 0     | 0     | 0 | 1       |
| rs17124548   | 11 | 120788631 | T | A | -0.552 | 0.581  | -  | 0     | 0     | 0 | 1       |
| rs1006160    | 11 | 117739616 | A | T | 0.552  | 0.5811 | +  | 0     | 0     | 0 | 1       |
| rs7932655    | 11 | 116962563 | A | T | -0.552 | 0.5811 | -  | 0     | 0     | 0 | 1       |
| rs12421080   | 11 | 120790862 | A | T | -0.552 | 0.5812 | -  | 0     | 0     | 0 | 1       |
| rs59839888   | 11 | 116949853 | C | T | -0.551 | 0.5813 | +- | 43    | 5.259 | 1 | 0.02183 |
| rs17124764   | 11 | 120959463 | T | A | -0.551 | 0.5814 | -  | 0     | 0     | 0 | 1       |
| rs11217186   | 11 | 119083906 | T | C | 0.551  | 0.5815 | ++ | 0     | 0.383 | 1 | 0.536   |
| rs1787716    | 11 | 116560174 | A | G | -0.551 | 0.5816 | -  | 0     | 0     | 0 | 1       |
| rs1942926    | 11 | 117599333 | A | C | 0.551  | 0.5819 | +  | 0     | 0     | 0 | 1       |
| rs56016514   | 11 | 116961588 | A | G | -0.551 | 0.5819 | -  | 0     | 0     | 0 | 1       |
| rs57582454   | 11 | 116961892 | A | G | -0.551 | 0.5819 | -  | 0     | 0     | 0 | 1       |

|             |    |           |   |   |        |        |    |       |       |   |        |
|-------------|----|-----------|---|---|--------|--------|----|-------|-------|---|--------|
| rs61903423  | 11 | 116962078 | A | G | -0.551 | 0.5819 | -? | 0     | 0     | 0 | 1      |
| rs79175131  | 11 | 116375719 | T | C | 0.55   | 0.5822 | +  | 0     | 0     | 0 | 1      |
| rs10750123  | 11 | 117955810 | C | T | 0.55   | 0.5824 | +- | 0     | 0.138 | 1 | 0.7107 |
| rs4938278   | 11 | 116417813 | T | G | 0.55   | 0.5826 | ++ | 0     | 0.265 | 1 | 0.6066 |
| rs73000642  | 11 | 120448042 | A | G | -0.55  | 0.5826 | -? | 0     | 0     | 0 | 1      |
| rs2155364   | 11 | 121017301 | T | C | -0.549 | 0.5828 | -? | 0     | 0     | 0 | 1      |
| rs34841529  | 11 | 116448838 | A | C | 0.549  | 0.5829 | +  | 0     | 0     | 0 | 1      |
| rs558034    | 11 | 119705210 | A | G | 0.549  | 0.5829 | +  | 0     | 0     | 0 | 1      |
| rs514649    | 11 | 119716304 | G | A | -0.549 | 0.583  | -? | 0     | 0     | 0 | 1      |
| rs633867    | 11 | 116667480 | T | C | 0.549  | 0.5833 | +- | -44.7 | 2.073 | 1 | 0.1499 |
| rs949189    | 11 | 119902167 | C | T | 0.548  | 0.5834 | +  | 0     | 0     | 0 | 1      |
| rs10892152  | 11 | 117532543 | G | A | 0.548  | 0.5835 | +  | 0     | 0     | 0 | 1      |
| rs45615131  | 11 | 117989951 | T | A | 0.548  | 0.584  | ++ | 0     | 0     | 1 | 0.9894 |
| rs470876    | 11 | 120013307 | C | T | 0.547  | 0.5842 | +  | 0     | 0     | 0 | 1      |
| rs488672    | 11 | 120047745 | C | T | 0.547  | 0.5844 | +  | 0     | 0     | 0 | 1      |
| rs79118964  | 11 | 117033808 | T | C | 0.547  | 0.5844 | +  | 0     | 0     | 0 | 1      |
| rs118086106 | 11 | 119483599 | C | T | -0.547 | 0.5846 | -? | 0     | 0     | 0 | 1      |
| rs11216023  | 11 | 116460172 | C | G | 0.546  | 0.585  | +  | 0     | 0     | 0 | 1      |
| rs3851576   | 11 | 117638172 | C | A | 0.546  | 0.5853 | +  | 0     | 0     | 0 | 1      |
| rs17124324  | 11 | 120650633 | T | A | 0.546  | 0.5854 | +  | 0     | 0     | 0 | 1      |
| rs61904806  | 11 | 116434082 | C | T | -0.546 | 0.5854 | -- | 0     | 0.004 | 1 | 0.9498 |
| rs7932398   | 11 | 119071897 | G | C | 0.545  | 0.5854 | ++ | 0     | 0.406 | 1 | 0.5241 |
| rs2298491   | 11 | 120959800 | A | G | -0.545 | 0.5855 | -? | 0     | 0     | 0 | 1      |
| rs2257198   | 11 | 120402020 | A | G | 0.545  | 0.5856 | +  | 0     | 0     | 0 | 1      |
| rs35374605  | 11 | 117630114 | C | T | 0.545  | 0.5857 | +  | 0     | 0     | 0 | 1      |
| rs11217183  | 11 | 119078886 | G | A | 0.545  | 0.5858 | ++ | 0     | 0.387 | 1 | 0.5337 |
| rs11217184  | 11 | 119078993 | G | A | 0.545  | 0.5858 | ++ | 0     | 0.387 | 1 | 0.5337 |
| rs12798188  | 11 | 119612677 | T | C | 0.545  | 0.5858 | +  | 0     | 0     | 0 | 1      |
| rs1242598   | 11 | 117129637 | T | C | 0.545  | 0.586  | +  | 0     | 0     | 0 | 1      |
| rs79293731  | 11 | 121155566 | T | C | 0.545  | 0.586  | +  | 0     | 0     | 0 | 1      |
| rs12361543  | 11 | 116467589 | G | A | -0.544 | 0.5862 | -? | 0     | 0     | 0 | 1      |
| rs12794454  | 11 | 117633286 | A | T | 0.544  | 0.5862 | +  | 0     | 0     | 0 | 1      |
| rs4938402   | 11 | 117399918 | A | G | -0.544 | 0.5862 | -? | 0     | 0     | 0 | 1      |
| rs10892000  | 11 | 116498862 | G | T | 0.544  | 0.5864 | +  | 0     | 0     | 0 | 1      |
| rs34884722  | 11 | 120479125 | G | A | 0.544  | 0.5866 | +  | 0     | 0     | 0 | 1      |
| rs113190660 | 11 | 120169537 | T | C | -0.543 | 0.5868 | -- | 0     | 0.001 | 1 | 0.974  |
| rs651474    | 11 | 117961908 | C | T | -0.543 | 0.5869 | -- | 0     | 0.003 | 1 | 0.9574 |
| rs4581455   | 11 | 119481661 | A | G | 0.542  | 0.5876 | +  | 0     | 0     | 0 | 1      |
| rs574233    | 11 | 116295758 | T | G | -0.542 | 0.5878 | -? | 0     | 0     | 0 | 1      |
| rs547761    | 11 | 116314960 | C | T | 0.542  | 0.5881 | +  | 0     | 0     | 0 | 1      |
| rs11216485  | 11 | 117523508 | G | C | -0.541 | 0.5884 | -? | 0     | 0     | 0 | 1      |
| rs542613    | 11 | 118567084 | A | G | 0.541  | 0.5884 | ++ | 0     | 0.802 | 1 | 0.3706 |
| rs10892171  | 11 | 117642030 | A | T | 0.541  | 0.5887 | +  | 0     | 0     | 0 | 1      |
| rs12272862  | 11 | 119848377 | A | G | -0.541 | 0.5888 | -? | 0     | 0     | 0 | 1      |
| rs117287138 | 11 | 116794879 | A | G | 0.54   | 0.5889 | +  | 0     | 0     | 0 | 1      |
| rs604413    | 11 | 120029497 | G | A | -0.54  | 0.5891 | -? | 0     | 0     | 0 | 1      |
| rs590005    | 11 | 120024312 | T | A | -0.54  | 0.5892 | -? | 0     | 0     | 0 | 1      |
| rs491822    | 11 | 117772848 | T | C | -0.54  | 0.5893 | -? | 0     | 0     | 0 | 1      |
| rs4938389   | 11 | 117357696 | A | G | -0.54  | 0.5893 | -? | 0     | 0     | 0 | 1      |
| rs4938661   | 11 | 119384351 | C | G | -0.54  | 0.5894 | -? | 0     | 0     | 0 | 1      |
| rs10750176  | 11 | 120557343 | G | A | -0.54  | 0.5895 | -? | 0     | 0     | 0 | 1      |
| rs602030    | 11 | 119850718 | T | C | -0.54  | 0.5895 | -? | 0     | 0     | 0 | 1      |
| rs11600568  | 11 | 120083648 | G | C | 0.539  | 0.5896 | +  | 0     | 0     | 0 | 1      |
| rs755538    | 11 | 117768454 | T | C | 0.539  | 0.5896 | +  | 0     | 0     | 0 | 1      |
| rs12576806  | 11 | 117483306 | A | G | 0.539  | 0.5898 | +  | 0     | 0     | 0 | 1      |
| rs3741280   | 11 | 117403235 | T | G | 0.539  | 0.5898 | +  | 0     | 0     | 0 | 1      |

|             |    |           |   |   |        |        |    |        |       |   |         |
|-------------|----|-----------|---|---|--------|--------|----|--------|-------|---|---------|
| rs148403721 | 11 | 116757765 | A | C | -0.539 | 0.5899 | -? | 0      | 0     | 0 | 1       |
| rs11216384  | 11 | 117307002 | C | T | 0.539  | 0.59   | +  | 0      | 0     | 0 | 1       |
| rs1579885   | 11 | 119800548 | A | G | -0.539 | 0.59   | -? | 0      | 0     | 0 | 1       |
| rs28917236  | 11 | 117185892 | T | G | -0.539 | 0.59   | -? | 0      | 0     | 0 | 1       |
| rs570081    | 11 | 119740598 | G | A | -0.539 | 0.59   | -? | 0      | 0     | 0 | 1       |
| rs117785509 | 11 | 116586231 | A | G | -0.539 | 0.5901 | -- | 0      | 0.002 | 1 | 0.9664  |
| rs7940527   | 11 | 117398202 | C | G | -0.539 | 0.5901 | -? | 0      | 0     | 0 | 1       |
| rs11216416  | 11 | 117347207 | T | C | -0.538 | 0.5903 | -? | 0      | 0     | 0 | 1       |
| rs577733    | 11 | 120993066 | A | G | -0.538 | 0.5903 | -? | 0      | 0     | 0 | 1       |
| rs1240659   | 11 | 116493950 | G | T | -0.538 | 0.5904 | -? | 0      | 0     | 0 | 1       |
| rs2266788   | 11 | 116660686 | G | A | -0.538 | 0.5904 | +- | -41    | 2.128 | 1 | 0.1446  |
| rs4938793   | 11 | 120146360 | T | G | -0.538 | 0.5906 | -? | 0      | 0     | 0 | 1       |
| rs536069    | 11 | 120996292 | A | G | -0.538 | 0.5907 | -? | 0      | 0     | 0 | 1       |
| rs77196345  | 11 | 116448951 | T | C | 0.538  | 0.5907 | ++ | 0      | 0.034 | 1 | 0.8546  |
| rs113399762 | 11 | 118389698 | C | T | -0.538 | 0.5908 | +- | -148.8 | 1.206 | 1 | 0.2722  |
| rs55987240  | 11 | 119200202 | C | A | -0.537 | 0.5911 | -? | 0      | 0     | 0 | 1       |
| rs6589674   | 11 | 118566039 | G | A | 0.537  | 0.5911 | ++ | 0      | 0.713 | 1 | 0.3984  |
| rs11821311  | 11 | 117772179 | T | C | 0.537  | 0.5914 | +  | 0      | 0     | 0 | 1       |
| rs12574794  | 11 | 119330741 | T | C | -0.537 | 0.5914 | -? | 0      | 0     | 0 | 1       |
| rs3016414   | 11 | 120670765 | G | A | 0.537  | 0.5914 | +  | 0      | 0     | 0 | 1       |
| rs7950536   | 11 | 121154118 | G | A | 0.536  | 0.5917 | +  | 0      | 0     | 0 | 1       |
| rs3133858   | 11 | 120651611 | C | T | 0.536  | 0.5918 | +  | 0      | 0     | 0 | 1       |
| rs55903632  | 11 | 121156412 | C | G | 0.536  | 0.592  | +  | 0      | 0     | 0 | 1       |
| rs56142837  | 11 | 121156037 | G | T | 0.536  | 0.592  | +  | 0      | 0     | 0 | 1       |
| rs78303474  | 11 | 121154642 | C | T | 0.536  | 0.592  | +  | 0      | 0     | 0 | 1       |
| rs11217816  | 11 | 120190997 | G | A | -0.536 | 0.5921 | -? | 0      | 0     | 0 | 1       |
| rs4589313   | 11 | 119236794 | A | G | 0.536  | 0.5921 | +  | 0      | 0     | 0 | 1       |
| rs4938317   | 11 | 116778275 | C | T | 0.536  | 0.5922 | +  | 0      | 0     | 0 | 1       |
| rs79197348  | 11 | 116238176 | G | C | -0.536 | 0.5923 | -- | 0      | 0.192 | 1 | 0.6612  |
| rs888245    | 11 | 116723737 | G | C | 0.535  | 0.5924 | +  | 0      | 0     | 0 | 1       |
| rs9667814   | 11 | 116671823 | C | G | -0.535 | 0.5925 | +- | -28.8  | 2.329 | 1 | 0.127   |
| rs2000525   | 11 | 120907482 | A | G | -0.535 | 0.5926 | -? | 0      | 0     | 0 | 1       |
| rs4245205   | 11 | 119584506 | T | C | 0.535  | 0.5926 | +  | 0      | 0     | 0 | 1       |
| rs4533047   | 11 | 119584347 | T | C | 0.535  | 0.5926 | +  | 0      | 0     | 0 | 1       |
| rs7927510   | 11 | 119584876 | A | T | 0.535  | 0.5926 | +  | 0      | 0     | 0 | 1       |
| rs7946962   | 11 | 119586216 | T | C | 0.535  | 0.5926 | +  | 0      | 0     | 0 | 1       |
| rs2852244   | 11 | 120624775 | C | G | 0.535  | 0.5927 | +  | 0      | 0     | 0 | 1       |
| rs117437529 | 11 | 116512452 | T | C | -0.535 | 0.5928 | -? | 0      | 0     | 0 | 1       |
| rs7948661   | 11 | 118341649 | C | T | -0.535 | 0.5929 | +- | 0      | 0.806 | 1 | 0.3692  |
| rs1783861   | 11 | 117963635 | T | A | -0.535 | 0.593  | -- | 0      | 0.002 | 1 | 0.9634  |
| rs4938403   | 11 | 117409910 | A | C | -0.534 | 0.5931 | -? | 0      | 0     | 0 | 1       |
| rs11218044  | 11 | 120756908 | A | G | -0.534 | 0.5932 | -? | 0      | 0     | 0 | 1       |
| rs12419991  | 11 | 116301251 | T | C | -0.534 | 0.5932 | -? | 0      | 0     | 0 | 1       |
| rs11216034  | 11 | 116470173 | C | A | -0.534 | 0.5933 | -? | 0      | 0     | 0 | 1       |
| rs1240658   | 11 | 116496360 | C | T | -0.534 | 0.5933 | -? | 0      | 0     | 0 | 1       |
| rs635706    | 11 | 117694089 | G | A | -0.534 | 0.5936 | -? | 0      | 0     | 0 | 1       |
| rs17601549  | 11 | 117998077 | T | C | 0.534  | 0.5937 | ++ | 0      | 0.001 | 1 | 0.9749  |
| rs596911    | 11 | 120025476 | A | G | -0.533 | 0.5937 | -? | 0      | 0     | 0 | 1       |
| rs659912    | 11 | 120026241 | G | A | -0.533 | 0.5937 | -? | 0      | 0     | 0 | 1       |
| rs35288685  | 11 | 121183145 | T | C | -0.533 | 0.5938 | -? | 0      | 0     | 0 | 1       |
| rs529657    | 11 | 120042087 | C | T | 0.533  | 0.5938 | +  | 0      | 0     | 0 | 1       |
| rs11602018  | 11 | 120753572 | G | A | -0.533 | 0.594  | -? | 0      | 0     | 0 | 1       |
| rs12361746  | 11 | 119659477 | T | C | 0.533  | 0.594  | ++ | 0      | 0.002 | 1 | 0.9617  |
| rs12794726  | 11 | 118566313 | T | C | 0.533  | 0.5942 | ++ | 0      | 0.718 | 1 | 0.397   |
| rs73578608  | 11 | 120760463 | A | G | -0.533 | 0.5942 | -? | 0      | 0     | 0 | 1       |
| rs2231440   | 11 | 118175439 | A | G | -0.533 | 0.5943 | +- | -10.5  | 2.714 | 1 | 0.09947 |

|              |    |           |   |   |        |        |   |        |       |   |         |
|--------------|----|-----------|---|---|--------|--------|---|--------|-------|---|---------|
| rs2852226    | 11 | 120619586 | A | G | 0.532  | 0.5945 | + | 0      | 0     | 0 | 1       |
| rs1567377    | 11 | 119480810 | C | T | 0.532  | 0.5946 | + | 0      | 0     | 0 | 1       |
| rs1107149    | 11 | 119973745 | C | T | 0.532  | 0.5947 | + | 0      | 0     | 0 | 1       |
| rs117730773  | 11 | 116547972 | T | C | -0.532 | 0.5947 | - | 0      | 0     | 0 | 1       |
| rs894839     | 11 | 120337705 | G | A | -0.532 | 0.5947 | - | 0      | 0     | 0 | 1       |
| rs55942271   | 11 | 118177115 | T | C | 0.532  | 0.5948 | + | 0      | 0     | 0 | 1       |
| rs7122363    | 11 | 116449283 | T | C | 0.532  | 0.5949 | + | 0      | 0     | 0 | 1       |
| rs11216612   | 11 | 117773893 | T | C | -0.531 | 0.5951 | - | 0      | 0     | 0 | 1       |
| rs12146702   | 11 | 117663838 | T | C | -0.531 | 0.5953 | - | 0      | 0     | 0 | 1       |
| rs2854117    | 11 | 116700142 | T | C | 0.531  | 0.5954 | + | 0      | 0     | 0 | 1       |
| rs7124649    | 11 | 116948640 | C | T | -0.531 | 0.5955 | + | 50.3   | 6.034 | 1 | 0.01403 |
| rs11216257   | 11 | 116932561 | C | T | 0.531  | 0.5956 | + | 0      | 0     | 0 | 1       |
| rs10892208   | 11 | 117955759 | G | A | 0.531  | 0.5957 | + | 0      | 0.131 | 1 | 0.7173  |
| rs73012993   | 11 | 116528663 | G | A | 0.531  | 0.5957 | + | 0      | 0     | 0 | 1       |
| rs143408085  | 11 | 119580246 | A | G | 0.53   | 0.5958 | + | 0      | 0     | 0 | 1       |
| rs6589821    | 11 | 120494089 | A | G | 0.53   | 0.5961 | + | 0      | 0     | 0 | 1       |
| rs34250455   | 11 | 118157681 | T | C | -0.53  | 0.5963 | + | -3.9   | 2.887 | 1 | 0.08932 |
| rs61905132   | 11 | 116673464 | T | C | 0.53   | 0.5963 | + | 0      | 0     | 0 | 1       |
| rs12285901   | 11 | 119235960 | A | G | 0.53   | 0.5964 | + | 0      | 0     | 0 | 1       |
| rs3020105    | 11 | 120684447 | G | A | 0.53   | 0.5964 | + | 0      | 0     | 0 | 1       |
| rs562780     | 11 | 118362414 | T | C | 0.53   | 0.5964 | + | 0      | 0.862 | 1 | 0.3531  |
| rs59069289   | 11 | 118802128 | T | G | 0.53   | 0.5964 | + | -88.7  | 1.59  | 1 | 0.2074  |
| rs59480472   | 11 | 118802386 | C | T | 0.53   | 0.5964 | + | -88.7  | 1.59  | 1 | 0.2074  |
| rs11216157   | 11 | 116711180 | G | A | 0.529  | 0.5965 | + | 0      | 0     | 0 | 1       |
| rs4938735    | 11 | 119747470 | T | C | 0.529  | 0.5965 | + | 0      | 0     | 0 | 1       |
| rs76234156   | 11 | 116519181 | A | C | -0.529 | 0.5965 | - | 0      | 0     | 0 | 1       |
| rs7947659    | 11 | 116419981 | C | A | 0.529  | 0.5965 | + | 0      | 0.366 | 1 | 0.5452  |
| rs11216172   | 11 | 116749878 | G | A | -0.529 | 0.5966 | - | 0      | 0     | 0 | 1       |
| rs61900138   | 11 | 118782222 | C | T | 0.529  | 0.5966 | + | -22.6  | 2.447 | 1 | 0.1177  |
| rs7131629    | 11 | 119973299 | A | G | 0.529  | 0.5966 | + | 0      | 0     | 0 | 1       |
| rs7128433    | 11 | 121156755 | T | C | 0.529  | 0.5967 | + | 0      | 0     | 0 | 1       |
| rs3888083    | 11 | 117341163 | C | T | -0.529 | 0.5968 | - | 0      | 0     | 0 | 1       |
| rs11216947   | 11 | 118567218 | A | G | 0.529  | 0.5969 | + | 0      | 0.756 | 1 | 0.3844  |
| rs10219304   | 11 | 121127685 | A | G | -0.529 | 0.597  | - | 0      | 0     | 0 | 1       |
| rs113442800  | 11 | 119818055 | T | C | 0.529  | 0.597  | + | 0      | 0     | 0 | 1       |
| rs111463966  | 11 | 120554375 | G | T | -0.529 | 0.5971 | - | 0      | 0     | 0 | 1       |
| rs1786191    | 11 | 117947208 | C | T | -0.529 | 0.5971 | - | 0      | 0     | 0 | 1       |
| rs7395060    | 11 | 119703617 | G | A | -0.529 | 0.5971 | - | 0      | 0     | 0 | 1       |
| rs11216561   | 11 | 117685575 | C | T | 0.528  | 0.5973 | + | 0      | 0     | 0 | 1       |
| rs3892796    | 11 | 117302910 | A | G | 0.528  | 0.5973 | + | 0      | 0     | 0 | 1       |
| rs73020476   | 11 | 117772389 | C | T | 0.528  | 0.5973 | + | 0      | 0     | 0 | 1       |
| rs10790218   | 11 | 117741995 | A | G | 0.528  | 0.5974 | + | 0      | 0     | 0 | 1       |
| rs599320     | 11 | 116740659 | C | G | -0.528 | 0.5974 | + | 35.7   | 4.667 | 1 | 0.03074 |
| rs186292996  | 11 | 117682332 | T | C | -0.528 | 0.5975 | - | 0      | 0     | 0 | 1       |
| rs615539     | 11 | 119850725 | G | A | -0.528 | 0.5975 | - | 0      | 0     | 0 | 1       |
| rs626225     | 11 | 120034115 | G | A | -0.528 | 0.5975 | - | 0      | 0     | 0 | 1       |
| rs77726126   | 11 | 121153556 | G | T | 0.528  | 0.5975 | + | 0      | 0     | 0 | 1       |
| rs7926828    | 11 | 116586423 | C | T | -0.528 | 0.5977 | - | 0      | 0     | 0 | 1       |
| rs11602560   | 11 | 117415187 | T | C | -0.528 | 0.5978 | - | 0      | 0     | 0 | 1       |
| rs35909519   | 11 | 117416249 | T | C | -0.528 | 0.5978 | - | 0      | 0     | 0 | 1       |
| rs6589799    | 11 | 119971523 | C | T | 0.528  | 0.5978 | + | 0      | 0     | 0 | 1       |
| rs1459783673 | 11 | 119480660 | A | T | 0.527  | 0.598  | + | 0      | 0     | 0 | 1       |
| rs9332871    | 11 | 118393856 | T | G | -0.527 | 0.598  | + | -135.6 | 1.273 | 1 | 0.2591  |
| rs79294438   | 11 | 119341720 | T | C | 0.527  | 0.5982 | + | 0      | 0     | 0 | 1       |
| rs111322300  | 11 | 118893878 | C | T | -0.527 | 0.5985 | - | 0      | 0     | 1 | 0.9941  |
| rs10892177   | 11 | 117685220 | C | G | 0.526  | 0.5986 | + | 0      | 0     | 0 | 1       |

|             |    |           |   |   |        |        |   |        |       |   |         |
|-------------|----|-----------|---|---|--------|--------|---|--------|-------|---|---------|
| rs11216169  | 11 | 116744389 | C | T | 0.526  | 0.5986 | + | 0      | 0     | 0 | 1       |
| rs11218176  | 11 | 121041724 | A | T | -0.526 | 0.5988 | - | 0      | 0     | 0 | 1       |
| rs4938782   | 11 | 119978951 | T | C | 0.526  | 0.5988 | + | 0      | 0     | 0 | 1       |
| rs620924    | 11 | 117947698 | A | G | -0.526 | 0.5988 | - | 0      | 0     | 0 | 1       |
| rs75598010  | 11 | 121041584 | T | C | -0.526 | 0.5988 | - | 0      | 0     | 0 | 1       |
| rs117507766 | 11 | 119396373 | T | C | 0.526  | 0.5989 | + | 0      | 0     | 0 | 1       |
| rs76448372  | 11 | 118045846 | A | G | 0.526  | 0.5989 | + | 32.1   | 4.416 | 1 | 0.03561 |
| rs76908457  | 11 | 116447795 | C | T | 0.526  | 0.5992 | + | 0      | 0.036 | 1 | 0.8491  |
| rs11600216  | 11 | 117690400 | C | T | 0.525  | 0.5993 | + | 0      | 0     | 0 | 1       |
| rs1893906   | 11 | 120525032 | A | G | -0.525 | 0.5993 | - | 0      | 0     | 0 | 1       |
| rs7930409   | 11 | 116958943 | G | A | -0.525 | 0.5994 | - | 0      | 0     | 0 | 1       |
| rs7930783   | 11 | 116959039 | A | G | -0.525 | 0.5994 | - | 0      | 0     | 0 | 1       |
| rs17120280  | 11 | 116942132 | A | G | 0.525  | 0.5996 | + | 0      | 0     | 0 | 1       |
| rs11607610  | 11 | 119595348 | T | C | 0.525  | 0.5997 | + | 0      | 0     | 0 | 1       |
| rs12798944  | 11 | 120149741 | C | T | -0.525 | 0.5997 | - | 0      | 0     | 0 | 1       |
| rs59854309  | 11 | 116566763 | T | C | 0.525  | 0.5998 | + | 0      | 0     | 0 | 1       |
| rs7950072   | 11 | 117525420 | G | A | -0.525 | 0.5998 | - | 0      | 0     | 0 | 1       |
| rs117079525 | 11 | 120331909 | T | C | -0.524 | 0.6001 | - | 0      | 0     | 0 | 1       |
| rs644287    | 11 | 118011805 | T | C | 0.524  | 0.6001 | + | 0      | 0.011 | 1 | 0.9159  |
| rs12294678  | 11 | 119805351 | T | C | -0.524 | 0.6002 | - | 0      | 0     | 0 | 1       |
| rs17311212  | 11 | 120067953 | A | G | 0.524  | 0.6003 | + | 0      | 0     | 0 | 1       |
| rs7114458   | 11 | 118566175 | A | G | 0.524  | 0.6003 | + | 0      | 0.726 | 1 | 0.3942  |
| rs11828621  | 11 | 120614119 | G | A | -0.524 | 0.6004 | - | 0      | 0     | 0 | 1       |
| rs7114565   | 11 | 117963939 | A | G | -0.524 | 0.6004 | - | 0      | 0.005 | 1 | 0.9445  |
| rs12417256  | 11 | 120337519 | C | A | -0.524 | 0.6005 | - | 0      | 0     | 0 | 1       |
| rs4938445   | 11 | 117745003 | A | G | 0.524  | 0.6005 | + | 0      | 0     | 0 | 1       |
| rs12295531  | 11 | 121108515 | T | C | -0.524 | 0.6006 | - | 0      | 0.159 | 1 | 0.6905  |
| rs7114216   | 11 | 118566234 | G | A | 0.523  | 0.6006 | + | 0      | 0.727 | 1 | 0.394   |
| rs75051127  | 11 | 121173349 | A | G | -0.524 | 0.6006 | - | 0      | 0     | 0 | 1       |
| rs78857232  | 11 | 116727465 | T | C | 0.524  | 0.6006 | + | 0      | 0     | 0 | 1       |
| rs3825041   | 11 | 116631707 | T | C | -0.523 | 0.6007 | + | -108   | 1.442 | 1 | 0.2297  |
| rs521609    | 11 | 117407301 | A | G | -0.523 | 0.6007 | - | 0      | 0     | 0 | 1       |
| rs7928435   | 11 | 116439719 | A | C | 0.523  | 0.6007 | + | 0      | 0.044 | 1 | 0.8347  |
| rs7484249   | 11 | 120142118 | C | T | -0.523 | 0.6008 | - | 0      | 0     | 0 | 1       |
| rs11215929  | 11 | 116303270 | G | A | -0.523 | 0.6011 | - | 0      | 0     | 0 | 1       |
| rs7935488   | 11 | 119482705 | T | C | 0.523  | 0.6011 | + | 0      | 0     | 0 | 1       |
| rs528431    | 11 | 117662909 | A | C | -0.522 | 0.6014 | - | 0      | 0     | 0 | 1       |
| rs61903419  | 11 | 116957219 | A | G | -0.522 | 0.6015 | - | 0      | 0     | 0 | 1       |
| rs10790236  | 11 | 117986853 | C | T | -0.522 | 0.6016 | - | 0      | 0.008 | 1 | 0.9304  |
| rs10892102  | 11 | 117308936 | T | G | -0.522 | 0.6018 | - | 0      | 0     | 0 | 1       |
| rs76136280  | 11 | 116788491 | T | C | 0.522  | 0.6019 | + | 0      | 0     | 0 | 1       |
| rs1944156   | 11 | 116396613 | C | A | 0.521  | 0.6023 | + | 0      | 0     | 0 | 1       |
| rs572126    | 11 | 118359161 | G | A | 0.521  | 0.6024 | + | 0      | 0.005 | 1 | 0.9428  |
| rs7130076   | 11 | 118566090 | C | T | 0.521  | 0.6024 | + | 0      | 0.729 | 1 | 0.3932  |
| rs1110705   | 11 | 119974597 | C | T | 0.521  | 0.6025 | + | 0      | 0     | 0 | 1       |
| rs10892502  | 11 | 119818802 | C | T | 0.521  | 0.6026 | + | 0      | 0     | 0 | 1       |
| rs570745    | 11 | 116329090 | A | G | -0.52  | 0.6028 | - | 0      | 0     | 0 | 1       |
| rs7941900   | 11 | 119979007 | C | T | -0.52  | 0.6028 | - | 0      | 0     | 0 | 1       |
| rs1787691   | 11 | 116568713 | A | G | 0.52   | 0.6032 | + | 0      | 0     | 0 | 1       |
| rs11218031  | 11 | 120722457 | A | C | 0.52   | 0.6033 | + | 0      | 0     | 0 | 1       |
| rs2301574   | 11 | 119063908 | T | C | 0.519  | 0.6034 | + | 0      | 0.71  | 1 | 0.3996  |
| rs113566564 | 11 | 118335147 | A | G | -0.519 | 0.6035 | + | -191.7 | 1.028 | 1 | 0.3106  |
| rs4938310   | 11 | 116629949 | T | C | -0.519 | 0.6035 | + | 4.8    | 3.15  | 1 | 0.07594 |
| rs7946219   | 11 | 116962759 | T | C | -0.519 | 0.6035 | - | 0      | 0     | 0 | 1       |
| rs7946729   | 11 | 116963180 | T | C | -0.519 | 0.6035 | - | 0      | 0     | 0 | 1       |
| rs10790211  | 11 | 117701057 | A | G | 0.519  | 0.6036 | + | 0      | 0     | 0 | 1       |

|             |    |           |   |   |        |        |   |        |       |   |         |
|-------------|----|-----------|---|---|--------|--------|---|--------|-------|---|---------|
| rs10892042  | 11 | 116760545 | A | G | 0.519  | 0.6036 | + | 0      | 0     | 0 | 1       |
| rs3759000   | 11 | 118135449 | C | T | -0.519 | 0.6036 | - | 0      | 0     | 0 | 1       |
| rs4938404   | 11 | 117411011 | T | C | -0.519 | 0.6036 | - | 0      | 0     | 0 | 1       |
| rs35235858  | 11 | 118157250 | T | C | -0.519 | 0.6037 | + | -4.7   | 2.866 | 1 | 0.09047 |
| rs11217426  | 11 | 119590878 | T | C | 0.519  | 0.6038 | + | 0      | 0     | 0 | 1       |
| rs17119829  | 11 | 116453571 | A | G | 0.519  | 0.6039 | + | 0      | 0     | 1 | 0.9866  |
| rs7946391   | 11 | 117323952 | C | T | 0.519  | 0.6039 | + | 0      | 0     | 0 | 1       |
| rs117181393 | 11 | 118017538 | C | T | 0.519  | 0.6041 | + | 0      | 0     | 0 | 1       |
| rs1939669   | 11 | 120592483 | A | T | 0.519  | 0.6041 | + | 0      | 0     | 0 | 1       |
| rs79425731  | 11 | 120357341 | A | G | -0.519 | 0.6041 | - | 0      | 0     | 0 | 1       |
| rs480793    | 11 | 116263533 | A | G | 0.518  | 0.6042 | + | 0      | 0     | 0 | 1       |
| rs4635116   | 11 | 116417048 | C | A | 0.518  | 0.6043 | + | 0      | 0.284 | 1 | 0.5941  |
| rs4252251   | 11 | 117859629 | A | C | 0.518  | 0.6044 | + | 0      | 0.076 | 1 | 0.783   |
| rs11607569  | 11 | 118880668 | C | T | -0.518 | 0.6046 | - | 0      | 0.018 | 1 | 0.8931  |
| rs12281156  | 11 | 117677039 | A | T | 0.518  | 0.6046 | + | 0      | 0.208 | 1 | 0.6486  |
| rs3133223   | 11 | 120605232 | A | G | 0.518  | 0.6046 | + | 0      | 0     | 0 | 1       |
| rs2243935   | 11 | 117824960 | A | G | 0.518  | 0.6047 | + | 0      | 0     | 0 | 1       |
| rs558247    | 11 | 117767498 | G | A | 0.518  | 0.6047 | + | 0      | 0     | 0 | 1       |
| rs7129944   | 11 | 120299707 | C | T | 0.518  | 0.6047 | + | 0      | 0     | 0 | 1       |
| rs11216158  | 11 | 116711350 | A | G | 0.518  | 0.6048 | + | 0      | 0     | 0 | 1       |
| rs11826999  | 11 | 116553778 | A | G | -0.517 | 0.6049 | - | 0      | 0     | 0 | 1       |
| rs76747451  | 11 | 116508833 | G | T | -0.517 | 0.6049 | - | 0      | 0     | 0 | 1       |
| rs7949154   | 11 | 119482832 | C | T | 0.517  | 0.6049 | + | 0      | 0     | 0 | 1       |
| rs10892101  | 11 | 117308927 | A | C | -0.517 | 0.605  | - | 0      | 0     | 0 | 1       |
| rs10892114  | 11 | 117324662 | G | C | 0.517  | 0.6051 | + | 0      | 0     | 0 | 1       |
| rs141023293 | 11 | 116772917 | A | G | -0.517 | 0.6051 | - | 0      | 0     | 0 | 1       |
| rs2852242   | 11 | 120796595 | T | A | 0.517  | 0.6053 | + | 0      | 0     | 0 | 1       |
| rs722729    | 11 | 117799804 | T | C | -0.517 | 0.6054 | + | 2.4    | 3.074 | 1 | 0.07954 |
| rs73004764  | 11 | 120055326 | G | C | -0.517 | 0.6054 | - | 0      | 0     | 0 | 1       |
| rs948462    | 11 | 117969163 | C | T | -0.517 | 0.6054 | - | 0      | 0.03  | 1 | 0.8618  |
| rs10790184  | 11 | 117319260 | A | G | -0.517 | 0.6055 | - | 0      | 0     | 0 | 1       |
| rs12808181  | 11 | 120094400 | T | C | -0.517 | 0.6055 | - | 0      | 0     | 0 | 1       |
| rs74660871  | 11 | 117572969 | C | T | 0.517  | 0.6055 | + | 0      | 0     | 0 | 1       |
| rs12361715  | 11 | 119659301 | T | C | 0.516  | 0.6056 | + | 0      | 0     | 1 | 0.9868  |
| rs639978    | 11 | 117953403 | G | A | 0.516  | 0.6058 | + | 0      | 0.621 | 1 | 0.4307  |
| rs11606979  | 11 | 116440214 | A | G | 0.516  | 0.6059 | + | 0      | 0.045 | 1 | 0.8314  |
| rs10160771  | 11 | 119809582 | A | G | -0.516 | 0.606  | - | 0      | 0     | 0 | 1       |
| rs180357    | 11 | 116599504 | C | T | -0.516 | 0.6061 | + | 0      | 0.461 | 1 | 0.4973  |
| rs7941518   | 11 | 116632787 | G | A | -0.515 | 0.6062 | + | 4.5    | 3.142 | 1 | 0.07632 |
| rs7942054   | 11 | 116632975 | A | G | -0.515 | 0.6062 | + | 4.5    | 3.142 | 1 | 0.07632 |
| rs1939670   | 11 | 120679559 | C | T | 0.515  | 0.6064 | + | 0      | 0     | 0 | 1       |
| rs2852217   | 11 | 120647226 | C | T | 0.515  | 0.6065 | + | 0      | 0     | 0 | 1       |
| rs61905145  | 11 | 116718415 | A | G | 0.515  | 0.6065 | + | 0      | 0     | 0 | 1       |
| rs77297809  | 11 | 116370266 | T | C | -0.515 | 0.6066 | - | 0      | 0     | 0 | 1       |
| rs4936518   | 11 | 120311198 | T | A | 0.515  | 0.6067 | + | 0      | 0     | 0 | 1       |
| rs10790428  | 11 | 121140993 | C | T | -0.515 | 0.6068 | - | 0      | 0     | 0 | 1       |
| rs61179449  | 11 | 118892835 | C | G | -0.515 | 0.6068 | - | 0      | 0     | 1 | 0.9827  |
| rs4938446   | 11 | 117745049 | A | T | 0.514  | 0.607  | + | 0      | 0     | 0 | 1       |
| rs79099791  | 11 | 116239244 | C | T | -0.514 | 0.607  | - | 0      | 0.264 | 1 | 0.6074  |
| rs9666263   | 11 | 119589703 | C | G | 0.514  | 0.607  | + | 0      | 0     | 0 | 1       |
| rs111527225 | 11 | 118065830 | A | G | 0.514  | 0.6071 | + | -110.2 | 1.427 | 1 | 0.2322  |
| rs12792619  | 11 | 116222151 | C | T | 0.514  | 0.6071 | + | -84.6  | 1.625 | 1 | 0.2024  |
| rs34759019  | 11 | 120479913 | A | C | 0.514  | 0.6071 | + | 0      | 0     | 0 | 1       |
| rs10790186  | 11 | 117324868 | G | A | 0.514  | 0.6072 | + | 0      | 0     | 0 | 1       |
| rs61901420  | 11 | 120612976 | G | A | -0.514 | 0.6072 | - | 0      | 0     | 0 | 1       |
| rs10790388  | 11 | 120494449 | A | C | 0.514  | 0.6074 | + | 0      | 0     | 0 | 1       |

|              |    |           |   |   |        |        |    |       |       |   |         |
|--------------|----|-----------|---|---|--------|--------|----|-------|-------|---|---------|
| rs11823889   | 11 | 116960403 | A | G | -0.514 | 0.6074 | -? | 0     | 0     | 0 | 1       |
| rs1715441    | 11 | 118072181 | T | C | 0.514  | 0.6074 | +? | 0     | 0     | 0 | 1       |
| rs77657279   | 11 | 120305873 | G | A | -0.513 | 0.6079 | -? | 0     | 0     | 0 | 1       |
| rs12805061   | 11 | 116553025 | G | A | -0.513 | 0.608  | -? | 0     | 0     | 0 | 1       |
| rs12806224   | 11 | 116552815 | C | T | -0.513 | 0.608  | -? | 0     | 0     | 0 | 1       |
| rs3825051    | 11 | 118174629 | G | A | 0.513  | 0.6081 | +? | 0     | 0     | 0 | 1       |
| rs1240783    | 11 | 116572525 | C | T | 0.513  | 0.6082 | +? | 0     | 0     | 0 | 1       |
| rs5012703    | 11 | 119054989 | C | T | -0.513 | 0.6082 | -? | 0     | 0     | 0 | 1       |
| rs10790419   | 11 | 121136455 | T | C | -0.513 | 0.6083 | -? | 0     | 0     | 0 | 1       |
| rs4612814    | 11 | 120594813 | G | A | -0.513 | 0.6083 | +- | 0     | 0.834 | 1 | 0.3612  |
| rs143448490  | 11 | 119923295 | A | G | -0.512 | 0.6084 | -? | 0     | 0     | 0 | 1       |
| rs1942930    | 11 | 117607138 | C | T | 0.512  | 0.6084 | +? | 0     | 0     | 0 | 1       |
| rs7951237    | 11 | 117606937 | A | T | 0.512  | 0.6084 | +? | 0     | 0     | 0 | 1       |
| rs1715455    | 11 | 118124092 | T | C | -0.512 | 0.6086 | -? | 0     | 0     | 0 | 1       |
| rs7120665    | 11 | 118131223 | C | T | -0.512 | 0.6086 | -? | 0     | 0     | 0 | 1       |
| rs11512467   | 11 | 117835174 | T | C | 0.512  | 0.6087 | ++ | 0     | 0.033 | 1 | 0.8558  |
| rs45539536   | 11 | 116617895 | T | C | -0.512 | 0.6087 | -- | 0     | 0.041 | 1 | 0.8396  |
| rs734167     | 11 | 120829359 | A | G | -0.512 | 0.6087 | -+ | 0     | 0.441 | 1 | 0.5065  |
| rs61903661   | 11 | 117113422 | G | A | 0.511  | 0.6091 | +? | 0     | 0     | 0 | 1       |
| rs651013     | 11 | 117947454 | C | T | -0.511 | 0.6091 | -? | 0     | 0     | 0 | 1       |
| rs56083337   | 11 | 118131813 | T | A | 0.511  | 0.6092 | +? | 0     | 0     | 0 | 1       |
| rs11217866   | 11 | 120300804 | A | T | 0.511  | 0.6093 | +? | 0     | 0     | 0 | 1       |
| rs117184822  | 11 | 117989798 | T | C | -0.511 | 0.6093 | -? | 0     | 0     | 0 | 1       |
| rs4938559    | 11 | 118718061 | T | C | 0.511  | 0.6095 | ++ | 0     | 0.174 | 1 | 0.6764  |
| rs4938560    | 11 | 118718062 | G | A | 0.511  | 0.6095 | ++ | 0     | 0.174 | 1 | 0.6764  |
| rs4572168    | 11 | 116555926 | A | G | 0.511  | 0.6096 | +? | 0     | 0     | 0 | 1       |
| rs502607     | 11 | 116474899 | T | C | -0.511 | 0.6097 | -? | 0     | 0     | 0 | 1       |
| rs74984550   | 11 | 119854036 | A | G | -0.511 | 0.6097 | -? | 0     | 0     | 0 | 1       |
| rs493834     | 11 | 118567444 | G | A | 0.51   | 0.6098 | ++ | 0     | 0.757 | 1 | 0.3842  |
| rs77206548   | 11 | 116574463 | A | G | -0.51  | 0.6099 | -- | 0     | 0.002 | 1 | 0.966   |
| rs58955701   | 11 | 118892872 | T | C | -0.51  | 0.6101 | -- | 0     | 0.001 | 1 | 0.9805  |
| rs142744740  | 11 | 116688791 | A | C | 0.51   | 0.6102 | +? | 0     | 0     | 0 | 1       |
| rs75214151   | 11 | 116464362 | A | G | -0.51  | 0.6102 | -? | 0     | 0     | 0 | 1       |
| rs7937589    | 11 | 121133278 | C | G | -0.51  | 0.6102 | -? | 0     | 0     | 0 | 1       |
| rs41440247   | 11 | 117332557 | C | G | 0.51   | 0.6104 | +? | 0     | 0     | 0 | 1       |
| rs4936401    | 11 | 117595260 | C | T | 0.509  | 0.6106 | +? | 0     | 0     | 0 | 1       |
| rs531860     | 11 | 116261676 | A | G | 0.509  | 0.6106 | +? | 0     | 0     | 0 | 1       |
| rs61900894   | 11 | 120398787 | G | C | 0.509  | 0.6107 | +? | 0     | 0     | 0 | 1       |
| rs7479373    | 11 | 118171285 | C | T | -0.509 | 0.611  | -+ | -11.2 | 2.698 | 1 | 0.1005  |
| rs12798115   | 11 | 118156517 | C | G | -0.509 | 0.6111 | -+ | -4.5  | 2.87  | 1 | 0.09025 |
| rs12275106   | 11 | 121170025 | C | A | 0.508  | 0.6112 | +? | 0     | 0     | 0 | 1       |
| rs17125142   | 11 | 121170179 | G | A | 0.508  | 0.6112 | +? | 0     | 0     | 0 | 1       |
| rs7114993    | 11 | 116496310 | T | G | 0.508  | 0.6113 | +? | 0     | 0     | 0 | 1       |
| rs11217558   | 11 | 119776105 | T | G | 0.508  | 0.6114 | +? | 0     | 0     | 0 | 1       |
| rs11828763   | 11 | 116559663 | G | A | 0.508  | 0.6114 | +? | 0     | 0     | 0 | 1       |
| rs12225622   | 11 | 116553924 | T | C | 0.507  | 0.6119 | +? | 0     | 0     | 0 | 1       |
| rs1294767885 | 11 | 116780095 | T | A | 0.507  | 0.6121 | +? | 0     | 0     | 0 | 1       |
| rs1145219    | 11 | 117537799 | T | G | -0.507 | 0.6122 | -? | 0     | 0     | 0 | 1       |
| rs58290590   | 11 | 117308984 | A | G | -0.507 | 0.6122 | -? | 0     | 0     | 0 | 1       |
| rs180323     | 11 | 116626570 | G | A | -0.507 | 0.6123 | -+ | 0     | 0.258 | 1 | 0.6114  |
| rs673292     | 11 | 120019288 | A | G | -0.507 | 0.6124 | -? | 0     | 0     | 0 | 1       |
| rs4245212    | 11 | 120273353 | G | A | 0.507  | 0.6125 | +? | 0     | 0     | 0 | 1       |
| rs10466588   | 11 | 116610249 | G | A | -0.506 | 0.6127 | +- | -46.3 | 2.051 | 1 | 0.1521  |
| rs117788500  | 11 | 116613034 | C | G | -0.506 | 0.6129 | -- | 0     | 0.013 | 1 | 0.9108  |
| rs12280753   | 11 | 116613660 | T | C | -0.506 | 0.6129 | +- | -44.2 | 2.081 | 1 | 0.1492  |
| rs12577638   | 11 | 120755655 | A | G | -0.506 | 0.6131 | -? | 0     | 0     | 0 | 1       |

|             |    |           |   |   |        |        |    |      |       |   |         |
|-------------|----|-----------|---|---|--------|--------|----|------|-------|---|---------|
| rs79530380  | 11 | 116789188 | A | T | 0.506  | 0.6132 | +  | 0    | 0     | 0 | 1       |
| rs79461323  | 11 | 120065462 | G | A | 0.505  | 0.6133 | +  | 0    | 0     | 0 | 1       |
| rs17518841  | 11 | 116615244 | A | G | -0.505 | 0.6134 | -- | 0    | 0.043 | 1 | 0.8365  |
| rs4938621   | 11 | 118892277 | T | C | -0.505 | 0.6134 | -- | 0    | 0.001 | 1 | 0.9746  |
| rs11216480  | 11 | 117515473 | A | G | -0.505 | 0.6138 | -? | 0    | 0     | 0 | 1       |
| rs61905711  | 11 | 116906431 | T | C | -0.505 | 0.6139 | -? | 0    | 0     | 0 | 1       |
| rs3133846   | 11 | 120597136 | C | T | 0.504  | 0.614  | +  | 0    | 0     | 0 | 1       |
| rs1941406   | 11 | 120141165 | A | G | -0.504 | 0.6141 | -? | 0    | 0     | 0 | 1       |
| rs17120035  | 11 | 116663851 | T | C | -0.504 | 0.6142 | -+ | 0    | 0.296 | 1 | 0.5865  |
| rs3802877   | 11 | 117414948 | T | C | -0.504 | 0.6146 | -? | 0    | 0     | 0 | 1       |
| rs4500497   | 11 | 119492095 | T | C | 0.504  | 0.6146 | +  | 0    | 0     | 0 | 1       |
| rs117447786 | 11 | 119859971 | A | C | -0.503 | 0.6147 | -? | 0    | 0     | 0 | 1       |
| rs75355006  | 11 | 117332512 | C | T | 0.503  | 0.6148 | +  | 0    | 0     | 0 | 1       |
| rs4936553   | 11 | 120688599 | A | G | 0.503  | 0.615  | +  | 0    | 0     | 0 | 1       |
| rs78052530  | 11 | 116229010 | C | A | -0.503 | 0.6151 | -? | 0    | 0     | 0 | 1       |
| rs629470    | 11 | 118320553 | A | G | 0.503  | 0.6152 | ++ | 0    | 0.015 | 1 | 0.9018  |
| rs7103224   | 11 | 116663966 | A | G | -0.502 | 0.6156 | -+ | 0    | 0.3   | 1 | 0.5842  |
| rs11217530  | 11 | 119708875 | A | G | 0.502  | 0.6157 | +  | 0    | 0     | 0 | 1       |
| rs2282549   | 11 | 117539771 | C | A | 0.502  | 0.6158 | +  | 0    | 0     | 0 | 1       |
| rs561394    | 11 | 117719605 | G | A | -0.502 | 0.6158 | -? | 0    | 0     | 0 | 1       |
| rs140078194 | 11 | 116568290 | A | C | -0.501 | 0.616  | -- | 0    | 0.004 | 1 | 0.9468  |
| rs2187008   | 11 | 117954657 | G | C | 0.501  | 0.6163 | ++ | 0    | 0.004 | 1 | 0.9469  |
| rs10790353  | 11 | 119782056 | C | G | -0.501 | 0.6164 | -? | 0    | 0     | 0 | 1       |
| rs11823264  | 11 | 120294004 | A | G | 0.501  | 0.6164 | +  | 0    | 0     | 0 | 1       |
| rs906542    | 11 | 116426886 | G | A | 0.5    | 0.6169 | +  | 0    | 0     | 0 | 1       |
| rs12417661  | 11 | 121086572 | A | G | -0.5   | 0.6173 | -? | 0    | 0     | 0 | 1       |
| rs507133    | 11 | 117202437 | A | G | 0.5    | 0.6174 | +  | 0    | 0     | 0 | 1       |
| rs73018457  | 11 | 117688433 | T | C | -0.5   | 0.6174 | -? | 0    | 0     | 0 | 1       |
| rs12794618  | 11 | 120289699 | C | T | 0.499  | 0.6175 | +  | 0    | 0     | 0 | 1       |
| rs34004290  | 11 | 119684793 | C | G | -0.499 | 0.6176 | -? | 0    | 0     | 0 | 1       |
| rs34022886  | 11 | 118155804 | A | G | -0.499 | 0.6176 | -+ | -2.8 | 2.919 | 1 | 0.08756 |
| rs569       | 11 | 118894287 | G | A | -0.499 | 0.6176 | -- | 0    | 0.005 | 1 | 0.9424  |
| rs678262    | 11 | 118021740 | G | C | -0.499 | 0.6179 | -- | 0    | 0.239 | 1 | 0.6247  |
| rs538847    | 11 | 117335722 | T | C | -0.499 | 0.618  | -? | 0    | 0     | 0 | 1       |
| rs11605749  | 11 | 117784434 | G | C | 0.499  | 0.6181 | +  | 0    | 0     | 0 | 1       |
| rs1787689   | 11 | 116568382 | G | A | 0.498  | 0.6182 | +  | 0    | 0     | 0 | 1       |
| rs12786658  | 11 | 120091272 | A | G | -0.498 | 0.6183 | -? | 0    | 0     | 0 | 1       |
| rs10892670  | 11 | 120963898 | T | C | -0.498 | 0.6184 | -? | 0    | 0     | 0 | 1       |
| rs2115925   | 11 | 121181848 | G | A | -0.498 | 0.6184 | -? | 0    | 0     | 0 | 1       |
| rs149021690 | 11 | 119908975 | C | T | 0.498  | 0.6186 | +  | 0    | 0     | 0 | 1       |
| rs731512    | 11 | 120089886 | A | G | 0.498  | 0.6187 | +  | 0    | 0     | 0 | 1       |
| rs73584981  | 11 | 117658934 | C | T | 0.498  | 0.6187 | ++ | 0    | 0.005 | 1 | 0.946   |
| rs141633273 | 11 | 121181207 | T | C | 0.498  | 0.6188 | +  | 0    | 0     | 0 | 1       |
| rs7129707   | 11 | 120396485 | T | C | 0.498  | 0.6188 | +  | 0    | 0     | 0 | 1       |
| rs11605223  | 11 | 117748844 | G | C | 0.497  | 0.6189 | +  | 0    | 0     | 0 | 1       |
| rs3133845   | 11 | 120596053 | A | G | 0.497  | 0.619  | +  | 0    | 0     | 0 | 1       |
| rs57703856  | 11 | 117696211 | A | G | 0.497  | 0.619  | +  | 0    | 0     | 0 | 1       |
| rs12786505  | 11 | 119607659 | A | G | 0.497  | 0.6191 | +  | 0    | 0     | 0 | 1       |
| rs139131517 | 11 | 121176185 | T | C | 0.497  | 0.6191 | +  | 0    | 0     | 0 | 1       |
| rs623353    | 11 | 119969871 | C | A | 0.497  | 0.6191 | +  | 0    | 0     | 0 | 1       |
| rs77452664  | 11 | 117726559 | T | G | 0.497  | 0.6192 | +  | 0    | 0     | 0 | 1       |
| rs112636863 | 11 | 118333510 | C | T | -0.497 | 0.6193 | -+ | 0    | 0.801 | 1 | 0.3707  |
| rs10892143  | 11 | 117484392 | C | G | 0.497  | 0.6194 | +  | 0    | 0     | 0 | 1       |
| rs3133226   | 11 | 120592036 | C | T | 0.497  | 0.6194 | +  | 0    | 0     | 0 | 1       |
| rs7119090   | 11 | 117747110 | C | G | -0.497 | 0.6195 | -? | 0    | 0     | 0 | 1       |
| rs3758893   | 11 | 120975390 | A | G | -0.496 | 0.6196 | -? | 0    | 0     | 0 | 1       |

|             |    |           |   |   |        |        |    |       |       |   |         |
|-------------|----|-----------|---|---|--------|--------|----|-------|-------|---|---------|
| rs11217052  | 11 | 118717732 | G | A | 0.496  | 0.6198 | ++ | 0     | 0.211 | 1 | 0.6463  |
| rs73003743  | 11 | 120703243 | G | A | 0.496  | 0.6199 | +? | 0     | 0     | 0 | 1       |
| rs9783385   | 11 | 120715674 | G | T | 0.496  | 0.6199 | +? | 0     | 0     | 0 | 1       |
| rs10892007  | 11 | 116527609 | T | C | 0.496  | 0.62   | +? | 0     | 0     | 0 | 1       |
| rs7106652   | 11 | 118554248 | T | C | 0.496  | 0.6201 | -+ | 0     | 0.959 | 1 | 0.3275  |
| rs10892411  | 11 | 119457828 | G | C | 0.496  | 0.6202 | +? | 0     | 0     | 0 | 1       |
| rs11218024  | 11 | 120709387 | T | C | 0.495  | 0.6204 | +? | 0     | 0     | 0 | 1       |
| rs17119701  | 11 | 116331582 | G | A | 0.495  | 0.6205 | +? | 0     | 0     | 0 | 1       |
| rs657898    | 11 | 120017974 | C | T | -0.495 | 0.6205 | -? | 0     | 0     | 0 | 1       |
| rs143811287 | 11 | 116628396 | T | C | 0.495  | 0.6208 | +? | 0     | 0     | 0 | 1       |
| rs78893389  | 11 | 116475411 | T | C | 0.494  | 0.6211 | +? | 0     | 0     | 0 | 1       |
| rs60065241  | 11 | 118883491 | A | C | -0.494 | 0.6213 | -- | 0     | 0.001 | 1 | 0.9818  |
| rs642662    | 11 | 118567020 | G | A | 0.494  | 0.6213 | -+ | 0     | 0.816 | 1 | 0.3664  |
| rs4938279   | 11 | 116419268 | A | G | 0.494  | 0.6216 | ++ | 0     | 0.6   | 1 | 0.4387  |
| rs35400250  | 11 | 116398935 | T | C | 0.493  | 0.6217 | +? | 0     | 0     | 0 | 1       |
| rs509733    | 11 | 119738623 | T | C | -0.493 | 0.6217 | -? | 0     | 0     | 0 | 1       |
| rs10750096  | 11 | 116656788 | C | A | -0.493 | 0.6218 | +- | -47.5 | 2.035 | 1 | 0.1538  |
| rs537975    | 11 | 118362869 | T | C | 0.493  | 0.6218 | ++ | 0     | 0     | 1 | 0.9844  |
| rs477908    | 11 | 119702490 | T | G | 0.493  | 0.6219 | +? | 0     | 0     | 0 | 1       |
| rs644057    | 11 | 120827609 | A | G | 0.493  | 0.6222 | +? | 0     | 0     | 0 | 1       |
| rs575535    | 11 | 117772229 | C | G | -0.492 | 0.6224 | -? | 0     | 0     | 0 | 1       |
| rs2850806   | 11 | 120792285 | T | C | 0.492  | 0.6226 | +? | 0     | 0     | 0 | 1       |
| rs7127188   | 11 | 118893023 | C | A | -0.492 | 0.6226 | -- | 0     | 0.001 | 1 | 0.9724  |
| rs7114844   | 11 | 116496187 | A | G | 0.492  | 0.6227 | +? | 0     | 0     | 0 | 1       |
| rs79751425  | 11 | 121089364 | A | G | -0.492 | 0.6227 | -? | 0     | 0     | 0 | 1       |
| rs996888    | 11 | 119428158 | A | G | 0.492  | 0.623  | +? | 0     | 0     | 0 | 1       |
| rs10892715  | 11 | 121140729 | A | G | -0.491 | 0.6231 | -? | 0     | 0     | 0 | 1       |
| rs11606521  | 11 | 120556817 | G | A | 0.491  | 0.6232 | +? | 0     | 0     | 0 | 1       |
| rs78584663  | 11 | 120556631 | G | A | 0.491  | 0.6232 | +? | 0     | 0     | 0 | 1       |
| rs7484090   | 11 | 119458695 | G | A | 0.491  | 0.6237 | +? | 0     | 0     | 0 | 1       |
| rs1508106   | 11 | 116395210 | A | G | 0.49   | 0.624  | +? | 0     | 0     | 0 | 1       |
| rs551826    | 11 | 117138403 | G | C | 0.49   | 0.624  | +? | 0     | 0     | 0 | 1       |
| rs77630867  | 11 | 119598971 | T | A | -0.49  | 0.624  | -? | 0     | 0     | 0 | 1       |
| rs142273276 | 11 | 117176075 | C | T | -0.49  | 0.6241 | -? | 0     | 0     | 0 | 1       |
| rs2000526   | 11 | 120905771 | C | T | -0.489 | 0.6245 | -? | 0     | 0     | 0 | 1       |
| rs61900474  | 11 | 120021171 | A | T | -0.489 | 0.6245 | -? | 0     | 0     | 0 | 1       |
| rs1715425   | 11 | 118077689 | C | T | 0.489  | 0.6246 | +? | 0     | 0     | 0 | 1       |
| rs598503    | 11 | 116724204 | C | T | -0.489 | 0.6246 | +- | 26.3  | 4.071 | 1 | 0.04362 |
| rs75401133  | 11 | 119824399 | T | C | -0.489 | 0.6246 | -? | 0     | 0     | 0 | 1       |
| rs57053294  | 11 | 120711869 | C | T | 0.489  | 0.6247 | +? | 0     | 0     | 0 | 1       |
| rs12362811  | 11 | 116299000 | A | G | 0.489  | 0.6248 | +? | 0     | 0     | 0 | 1       |
| rs5130      | 11 | 116703146 | C | T | 0.489  | 0.6248 | +? | 0     | 0     | 0 | 1       |
| rs4936592   | 11 | 121053985 | T | C | 0.489  | 0.6249 | +? | 0     | 0     | 0 | 1       |
| rs73005121  | 11 | 121145354 | T | A | 0.489  | 0.6249 | +? | 0     | 0     | 0 | 1       |
| rs180360    | 11 | 116598988 | G | A | -0.488 | 0.6252 | -+ | -93.9 | 1.547 | 1 | 0.2136  |
| rs12361192  | 11 | 119603642 | C | T | 0.488  | 0.6253 | +? | 0     | 0     | 0 | 1       |
| rs597583    | 11 | 117421799 | G | C | -0.488 | 0.6254 | -? | 0     | 0     | 0 | 1       |
| rs10790424  | 11 | 121137520 | T | C | -0.488 | 0.6256 | -? | 0     | 0     | 0 | 1       |
| rs17120347  | 11 | 116996539 | A | G | -0.488 | 0.6256 | -? | 0     | 0     | 0 | 1       |
| rs12788624  | 11 | 118022107 | T | C | 0.488  | 0.6258 | +? | 0     | 0     | 0 | 1       |
| rs3809059   | 11 | 120206163 | A | T | 0.487  | 0.626  | +? | 0     | 0     | 0 | 1       |
| rs4938405   | 11 | 117411254 | C | G | -0.487 | 0.626  | -? | 0     | 0     | 0 | 1       |
| rs588930    | 11 | 117581689 | C | T | 0.487  | 0.626  | +? | 0     | 0     | 0 | 1       |
| rs12272993  | 11 | 116214112 | T | G | -0.487 | 0.6263 | -? | 0     | 0     | 0 | 1       |
| rs6589766   | 11 | 119483293 | A | G | 0.487  | 0.6263 | +? | 0     | 0     | 0 | 1       |
| rs7119061   | 11 | 121126530 | G | A | -0.487 | 0.6264 | -? | 0     | 0     | 0 | 1       |

|              |    |           |   |   |        |        |   |      |       |   |         |
|--------------|----|-----------|---|---|--------|--------|---|------|-------|---|---------|
| rs73020466   | 11 | 117770990 | G | A | 0.487  | 0.6266 | + | 0    | 0     | 0 | 1       |
| rs997956     | 11 | 117770775 | T | C | 0.487  | 0.6266 | + | 0    | 0     | 0 | 1       |
| rs112580285  | 11 | 121049649 | G | T | 0.486  | 0.6267 | + | 0    | 0     | 0 | 1       |
| rs4225       | 11 | 116703671 | G | T | -0.486 | 0.6267 | - | 0    | 0     | 0 | 1       |
| rs601052     | 11 | 119850450 | C | T | -0.486 | 0.6269 | - | 0    | 0     | 0 | 1       |
| rs12721030   | 11 | 116705278 | T | C | -0.486 | 0.627  | - | 0    | 0     | 0 | 1       |
| rs77983701   | 11 | 116507056 | C | T | 0.486  | 0.627  | + | 0    | 0     | 0 | 1       |
| rs610664     | 11 | 118556691 | G | A | 0.486  | 0.6272 | + | 0    | 0.912 | 1 | 0.3396  |
| rs11218191   | 11 | 121054619 | T | C | -0.485 | 0.6274 | - | 0    | 0     | 0 | 1       |
| rs533646     | 11 | 118566746 | G | C | 0.485  | 0.6275 | + | 0    | 0.764 | 1 | 0.382   |
| rs1784106    | 11 | 116567449 | A | C | 0.485  | 0.6276 | + | 0    | 0     | 0 | 1       |
| rs7107833    | 11 | 116396188 | C | T | -0.485 | 0.6276 | - | 0    | 0     | 0 | 1       |
| rs11602869   | 11 | 118554448 | A | G | 0.485  | 0.6277 | + | 0    | 0.923 | 1 | 0.3368  |
| rs145141827  | 11 | 119919351 | T | G | -0.485 | 0.6277 | - | 0    | 0     | 0 | 1       |
| rs1287392    | 11 | 120074732 | T | C | -0.485 | 0.6278 | - | 0    | 0     | 0 | 1       |
| rs10892575   | 11 | 120291137 | G | C | 0.485  | 0.628  | + | 0    | 0     | 0 | 1       |
| rs11217177   | 11 | 119065102 | C | T | 0.484  | 0.6281 | + | 0    | 0.597 | 1 | 0.4399  |
| rs2077334    | 11 | 116506410 | A | C | 0.484  | 0.6281 | + | 0    | 0     | 0 | 1       |
| rs4331144    | 11 | 118554100 | G | A | 0.484  | 0.6281 | + | 0    | 0.971 | 1 | 0.3244  |
| rs180363     | 11 | 116597889 | C | T | -0.484 | 0.6283 | + | 0    | 0.106 | 1 | 0.745   |
| rs2848728    | 11 | 120021674 | T | C | -0.484 | 0.6284 | - | 0    | 0     | 0 | 1       |
| rs4252305    | 11 | 117862979 | A | G | 0.484  | 0.6284 | + | 0    | 0     | 0 | 1       |
| rs552035     | 11 | 116265522 | C | T | 0.484  | 0.6284 | + | 0    | 0     | 0 | 1       |
| rs73009944   | 11 | 117863183 | A | G | 0.484  | 0.6284 | + | 0    | 0     | 0 | 1       |
| rs73009948   | 11 | 117863307 | T | G | 0.484  | 0.6284 | + | 0    | 0     | 0 | 1       |
| rs79879928   | 11 | 117252135 | A | G | 0.484  | 0.6284 | + | 0    | 0     | 0 | 1       |
| rs10892109   | 11 | 117321874 | G | C | -0.484 | 0.6285 | - | 0    | 0     | 0 | 1       |
| rs1350280779 | 11 | 119825798 | A | C | 0.484  | 0.6286 | + | 0    | 0     | 0 | 1       |
| rs12574374   | 11 | 120119395 | A | G | -0.484 | 0.6287 | - | 0    | 0     | 0 | 1       |
| rs11216032   | 11 | 116466894 | A | G | -0.483 | 0.6288 | - | 0    | 0     | 0 | 1       |
| rs13377487   | 11 | 118187395 | A | T | 0.483  | 0.6288 | + | 31.4 | 4.373 | 1 | 0.03651 |
| rs75318540   | 11 | 116683862 | T | C | 0.483  | 0.6289 | + | 0    | 0     | 0 | 1       |
| rs1270305911 | 11 | 116915229 | T | C | -0.483 | 0.6293 | + | 51.4 | 6.171 | 1 | 0.01299 |
| rs145339787  | 11 | 116921143 | C | T | -0.483 | 0.6293 | + | 51.4 | 6.171 | 1 | 0.01299 |
| rs717052     | 11 | 120180479 | A | G | -0.483 | 0.6293 | - | 0    | 0     | 0 | 1       |
| rs73594187   | 11 | 116915881 | C | T | -0.483 | 0.6293 | + | 51.4 | 6.171 | 1 | 0.01299 |
| rs505064     | 11 | 116319221 | C | T | -0.483 | 0.6294 | - | 0    | 0     | 0 | 1       |
| rs9332782    | 11 | 118347020 | C | T | 0.482  | 0.6295 | + | 0    | 0.121 | 1 | 0.7275  |
| rs78823230   | 11 | 117904328 | T | G | 0.482  | 0.6296 | + | 0    | 0.322 | 1 | 0.5707  |
| rs76836072   | 11 | 116653762 | T | C | -0.482 | 0.6297 | - | 0    | 0.108 | 1 | 0.7429  |
| rs7940234    | 11 | 120531547 | C | G | -0.482 | 0.6299 | - | 0    | 0     | 0 | 1       |
| rs6589845    | 11 | 120689035 | T | A | 0.482  | 0.6301 | + | 0    | 0     | 0 | 1       |
| rs143660533  | 11 | 118892759 | C | A | -0.481 | 0.6304 | - | 0    | 0     | 1 | 0.9879  |
| rs2852243    | 11 | 120796418 | C | T | 0.481  | 0.6305 | + | 0    | 0     | 0 | 1       |
| rs11600894   | 11 | 120478676 | T | C | 0.481  | 0.6306 | + | 0    | 0     | 0 | 1       |
| rs76820520   | 11 | 120524498 | A | G | -0.481 | 0.6306 | - | 0    | 0     | 0 | 1       |
| rs77132149   | 11 | 120522714 | A | G | -0.481 | 0.6306 | - | 0    | 0     | 0 | 1       |
| rs1268832    | 11 | 116575229 | T | G | 0.481  | 0.6308 | + | 0    | 0     | 0 | 1       |
| rs73020481   | 11 | 117772955 | C | T | 0.481  | 0.6308 | + | 0    | 0     | 0 | 1       |
| rs1793176    | 11 | 118080771 | T | A | 0.48   | 0.631  | + | 0    | 0     | 0 | 1       |
| rs117289748  | 11 | 118892757 | G | C | -0.48  | 0.6311 | - | 0    | 0     | 1 | 0.9893  |
| rs28989476   | 11 | 117177372 | C | T | -0.48  | 0.6311 | - | 0    | 0     | 0 | 1       |
| rs10750138   | 11 | 119055075 | G | A | -0.48  | 0.6312 | - | 0    | 0     | 0 | 1       |
| rs11607675   | 11 | 117333778 | A | G | 0.48   | 0.6314 | + | 0    | 0     | 0 | 1       |
| rs2715890    | 11 | 120110219 | C | G | -0.48  | 0.6314 | - | 0    | 0     | 0 | 1       |
| rs638903     | 11 | 120983264 | A | C | -0.48  | 0.6315 | - | 0    | 0     | 0 | 1       |

|             |    |           |   |   |        |        |   |        |       |   |        |
|-------------|----|-----------|---|---|--------|--------|---|--------|-------|---|--------|
| rs59462353  | 11 | 117690620 | C | T | 0.479  | 0.6316 | + | 0      | 0     | 0 | 1      |
| rs113028342 | 11 | 118333537 | G | A | -0.479 | 0.6318 | - | 0      | 0.982 | 1 | 0.3217 |
| rs7111020   | 11 | 120494400 | T | C | 0.479  | 0.6318 | + | 0      | 0     | 0 | 1      |
| rs111901186 | 11 | 118328052 | G | A | -0.479 | 0.632  | - | 0      | 0.783 | 1 | 0.3762 |
| rs138907015 | 11 | 119599641 | T | C | -0.478 | 0.6323 | - | 0      | 0     | 0 | 1      |
| rs10790162  | 11 | 116639104 | A | G | -0.478 | 0.6324 | + | -126.8 | 1.322 | 1 | 0.2501 |
| rs1263058   | 11 | 116575555 | A | G | 0.478  | 0.6325 | + | 0      | 0     | 0 | 1      |
| rs73014299  | 11 | 118189965 | T | C | 0.478  | 0.6325 | + | 0      | 0     | 0 | 1      |
| rs111982661 | 11 | 121055215 | T | C | 0.478  | 0.6328 | + | 0      | 0     | 0 | 1      |
| rs11217330  | 11 | 119453980 | C | A | -0.478 | 0.6328 | - | 0      | 0     | 0 | 1      |
| rs11216035  | 11 | 116470227 | C | T | -0.478 | 0.6329 | - | 0      | 0     | 0 | 1      |
| rs57192657  | 11 | 116437360 | C | A | 0.477  | 0.633  | + | 0      | 0.056 | 1 | 0.8123 |
| rs57502313  | 11 | 116437347 | C | T | 0.477  | 0.633  | + | 0      | 0.056 | 1 | 0.8123 |
| rs58567678  | 11 | 116437333 | A | G | 0.477  | 0.633  | + | 0      | 0.056 | 1 | 0.8123 |
| rs526602    | 11 | 117070691 | A | G | 0.477  | 0.6331 | + | 0      | 0     | 0 | 1      |
| rs77571570  | 11 | 116438634 | G | C | 0.477  | 0.6331 | + | 0      | 0.055 | 1 | 0.8142 |
| rs11825206  | 11 | 119570128 | C | T | -0.477 | 0.6333 | - | 0      | 0     | 0 | 1      |
| rs35430963  | 11 | 119749018 | T | A | 0.477  | 0.6334 | + | 0      | 0     | 0 | 1      |
| rs10790188  | 11 | 117325456 | A | G | -0.476 | 0.634  | - | 0      | 0     | 0 | 1      |
| rs508994    | 11 | 116280252 | A | C | 0.476  | 0.634  | + | 0      | 0     | 0 | 1      |
| rs594081    | 11 | 119969402 | A | C | 0.476  | 0.634  | + | 0      | 0     | 0 | 1      |
| rs7110261   | 11 | 117810129 | A | G | 0.476  | 0.6343 | - | -24.1  | 2.416 | 1 | 0.1201 |
| rs602168    | 11 | 119883753 | T | C | 0.476  | 0.6344 | + | 0      | 0     | 0 | 1      |
| rs7103239   | 11 | 117325898 | A | G | -0.476 | 0.6344 | - | 0      | 0     | 0 | 1      |
| rs115696360 | 11 | 116304790 | C | G | 0.475  | 0.6345 | + | 0      | 0     | 0 | 1      |
| rs1941631   | 11 | 117966597 | C | A | -0.475 | 0.6345 | - | 0      | 0.014 | 1 | 0.9065 |
| rs2512151   | 11 | 117885694 | G | A | 0.475  | 0.6346 | + | 0      | 0.487 | 1 | 0.4854 |
| rs3016356   | 11 | 116477772 | C | T | 0.474  | 0.6352 | + | 0      | 0     | 0 | 1      |
| rs73010409  | 11 | 117110417 | C | T | 0.474  | 0.6352 | + | 0      | 0     | 0 | 1      |
| rs79487385  | 11 | 116380781 | G | A | -0.474 | 0.6352 | - | 0      | 0     | 0 | 1      |
| rs117207582 | 11 | 120200671 | T | C | 0.474  | 0.6354 | + | 0      | 0     | 0 | 1      |
| rs73019251  | 11 | 116253169 | T | C | -0.474 | 0.6355 | - | 0      | 0     | 0 | 1      |
| rs12286715  | 11 | 119806447 | T | C | -0.474 | 0.6356 | - | 0      | 0     | 0 | 1      |
| rs145968026 | 11 | 118421841 | G | C | -0.474 | 0.6356 | - | 0      | 0.017 | 1 | 0.8949 |
| rs12295249  | 11 | 119806145 | A | G | -0.474 | 0.6357 | - | 0      | 0     | 0 | 1      |
| rs10892117  | 11 | 117325478 | C | T | -0.474 | 0.6358 | - | 0      | 0     | 0 | 1      |
| rs1939672   | 11 | 120675122 | T | C | 0.474  | 0.6358 | + | 0      | 0     | 0 | 1      |
| rs514143    | 11 | 118558449 | A | G | 0.474  | 0.6359 | - | 0      | 0.788 | 1 | 0.3747 |
| rs7927742   | 11 | 117314044 | C | T | 0.473  | 0.636  | + | 0      | 0     | 0 | 1      |
| rs1793173   | 11 | 118074117 | A | G | 0.473  | 0.6362 | + | 0      | 0     | 0 | 1      |
| rs1793174   | 11 | 118074337 | A | G | 0.473  | 0.6362 | + | 0      | 0     | 0 | 1      |
| rs4938425   | 11 | 117523275 | A | G | 0.473  | 0.6362 | + | 0      | 0     | 0 | 1      |
| rs471776    | 11 | 120050959 | A | G | 0.473  | 0.6365 | + | 0      | 0     | 0 | 1      |
| rs546441    | 11 | 120051363 | C | A | 0.473  | 0.6365 | + | 0      | 0     | 0 | 1      |
| rs551843    | 11 | 120052037 | A | G | 0.473  | 0.6365 | + | 0      | 0     | 0 | 1      |
| rs659375    | 11 | 119012846 | A | T | -0.472 | 0.6369 | - | 0      | 0     | 0 | 1      |
| rs6589565   | 11 | 116640237 | A | G | -0.472 | 0.6371 | + | -125.4 | 1.331 | 1 | 0.2486 |
| rs2156122   | 11 | 116496623 | A | C | 0.472  | 0.6372 | + | 0      | 0     | 0 | 1      |
| rs11218025  | 11 | 120710628 | C | T | 0.471  | 0.6373 | + | 0      | 0     | 0 | 1      |
| rs672176    | 11 | 120829249 | A | G | 0.471  | 0.6373 | + | 0      | 0     | 0 | 1      |
| rs7121857   | 11 | 120556389 | G | T | -0.471 | 0.6374 | - | 0      | 0     | 0 | 1      |
| rs7940963   | 11 | 120348444 | A | G | 0.471  | 0.6375 | + | 0      | 0     | 0 | 1      |
| rs867897    | 11 | 116388264 | G | C | 0.471  | 0.6375 | + | 0      | 0     | 0 | 1      |
| rs571751    | 11 | 118556797 | C | A | 0.471  | 0.6376 | - | 0      | 0.864 | 1 | 0.3527 |
| rs621843    | 11 | 119883723 | A | G | 0.471  | 0.6376 | + | 0      | 0     | 0 | 1      |
| rs668361    | 11 | 119883781 | A | G | 0.471  | 0.6376 | + | 0      | 0     | 0 | 1      |

|              |    |           |   |   |        |        |    |        |       |   |         |
|--------------|----|-----------|---|---|--------|--------|----|--------|-------|---|---------|
| rs948034     | 11 | 120677398 | C | T | 0.471  | 0.6378 | +  | 0      | 0     | 0 | 1       |
| rs17492380   | 11 | 116438851 | A | G | 0.47   | 0.6381 | ++ | 0      | 0.057 | 1 | 0.8111  |
| rs20494      | 11 | 119957453 | A | G | 0.47   | 0.6383 | +  | 0      | 0     | 0 | 1       |
| rs4938757    | 11 | 119878632 | T | C | -0.47  | 0.6383 | -  | 0      | 0     | 0 | 1       |
| rs78020509   | 11 | 118384811 | G | A | -0.47  | 0.6384 | -+ | -125.9 | 1.328 | 1 | 0.2491  |
| rs140479252  | 11 | 117111178 | C | T | 0.47   | 0.6385 | +  | 0      | 0     | 0 | 1       |
| rs111218525  | 11 | 116566538 | T | C | -0.47  | 0.6386 | -  | 0      | 0     | 0 | 1       |
| rs509641     | 11 | 118558952 | C | T | 0.47   | 0.6387 | -+ | 0      | 0.792 | 1 | 0.3735  |
| rs563549     | 11 | 118558953 | A | G | 0.47   | 0.6387 | -+ | 0      | 0.792 | 1 | 0.3735  |
| rs77229823   | 11 | 116380855 | G | A | -0.469 | 0.6389 | -  | 0      | 0     | 0 | 1       |
| rs10892161   | 11 | 117555644 | A | G | 0.469  | 0.639  | +  | 0      | 0     | 0 | 1       |
| rs7101554    | 11 | 118078761 | C | T | 0.469  | 0.639  | +  | 0      | 0     | 0 | 1       |
| rs581122     | 11 | 116838615 | T | C | -0.469 | 0.6391 | +- | 51.7   | 6.21  | 1 | 0.0127  |
| rs613377     | 11 | 118556084 | T | C | 0.469  | 0.6392 | -+ | 0      | 0.809 | 1 | 0.3684  |
| rs12223620   | 11 | 120709874 | G | T | 0.469  | 0.6393 | +  | 0      | 0     | 0 | 1       |
| rs11218022   | 11 | 120709008 | A | G | 0.468  | 0.6396 | +  | 0      | 0     | 0 | 1       |
| rs1475614837 | 11 | 116910320 | T | G | -0.468 | 0.6397 | +- | 51.7   | 6.212 | 1 | 0.01269 |
| rs73594175   | 11 | 116909994 | G | A | -0.468 | 0.6397 | +- | 51.7   | 6.212 | 1 | 0.01269 |
| rs73594181   | 11 | 116910427 | A | T | -0.468 | 0.6397 | +- | 51.7   | 6.212 | 1 | 0.01269 |
| rs79340485   | 11 | 116910454 | T | C | -0.468 | 0.6397 | +- | 51.7   | 6.212 | 1 | 0.01269 |
| rs563838     | 11 | 117201997 | T | C | 0.468  | 0.6398 | +  | 0      | 0     | 0 | 1       |
| rs73008690   | 11 | 119750813 | A | G | -0.468 | 0.6398 | -  | 0      | 0     | 0 | 1       |
| rs12366082   | 11 | 117380086 | G | C | 0.468  | 0.64   | +  | 0      | 0     | 0 | 1       |
| rs74743296   | 11 | 120750636 | C | A | -0.468 | 0.6401 | -  | 0      | 0     | 0 | 1       |
| rs717051     | 11 | 120180657 | T | C | -0.467 | 0.6403 | -  | 0      | 0     | 0 | 1       |
| rs4938465    | 11 | 117844785 | T | A | 0.467  | 0.6405 | ++ | 0      | 0.016 | 1 | 0.9006  |
| rs10466533   | 11 | 116612128 | G | A | -0.467 | 0.6407 | +- | -72.9  | 1.736 | 1 | 0.1877  |
| rs4938365    | 11 | 117112138 | C | A | 0.467  | 0.6407 | +  | 0      | 0     | 0 | 1       |
| rs11607656   | 11 | 117333657 | A | G | 0.467  | 0.6408 | +  | 0      | 0     | 0 | 1       |
| rs10892103   | 11 | 117309283 | A | G | -0.466 | 0.6409 | -  | 0      | 0     | 0 | 1       |
| rs4579962    | 11 | 117692334 | A | G | 0.466  | 0.6409 | +  | 0      | 0     | 0 | 1       |
| rs60524902   | 11 | 116380536 | G | T | -0.466 | 0.6409 | -  | 0      | 0     | 0 | 1       |
| rs117164546  | 11 | 119297248 | A | G | 0.466  | 0.6411 | +  | 0      | 0     | 0 | 1       |
| rs7120445    | 11 | 118879285 | C | A | -0.466 | 0.6411 | -- | 0      | 0     | 1 | 0.986   |
| rs11605069   | 11 | 118554436 | G | T | 0.466  | 0.6412 | -+ | 0      | 0.86  | 1 | 0.3537  |
| rs3133852    | 11 | 120602425 | G | T | -0.466 | 0.6412 | -  | 0      | 0     | 0 | 1       |
| rs34228131   | 11 | 119647700 | T | C | -0.466 | 0.6412 | -  | 0      | 0     | 0 | 1       |
| rs142774084  | 11 | 119652997 | A | G | 0.466  | 0.6414 | +  | 0      | 0     | 0 | 1       |
| rs7932832    | 11 | 119573524 | G | A | -0.466 | 0.6414 | -  | 0      | 0     | 0 | 1       |
| rs1320649    | 11 | 120677301 | T | C | 0.465  | 0.6418 | +  | 0      | 0     | 0 | 1       |
| rs17245340   | 11 | 119822015 | C | T | 0.465  | 0.642  | +  | 0      | 0     | 0 | 1       |
| rs2160669    | 11 | 116647607 | C | T | -0.465 | 0.6422 | +- | -75.5  | 1.71  | 1 | 0.191   |
| rs116915994  | 11 | 121142335 | T | C | 0.464  | 0.6423 | +  | 0      | 0     | 0 | 1       |
| rs11825284   | 11 | 118880012 | A | G | -0.464 | 0.6423 | -- | 0      | 0     | 1 | 0.9853  |
| rs73559119   | 11 | 118879824 | C | T | -0.464 | 0.6423 | -- | 0      | 0     | 1 | 0.9853  |
| rs56303695   | 11 | 119823216 | A | G | 0.464  | 0.6424 | +  | 0      | 0     | 0 | 1       |
| rs625513     | 11 | 118555719 | C | A | 0.464  | 0.6424 | -+ | 0      | 0.777 | 1 | 0.378   |
| rs609341     | 11 | 117341808 | T | G | -0.464 | 0.6427 | -  | 0      | 0     | 0 | 1       |
| rs12418028   | 11 | 117790674 | A | G | -0.463 | 0.6431 | -  | 0      | 0     | 0 | 1       |
| rs496288     | 11 | 116266614 | C | A | 0.463  | 0.6431 | +  | 0      | 0     | 0 | 1       |
| rs149239940  | 11 | 120826569 | A | G | -0.463 | 0.6434 | -  | 0      | 0     | 0 | 1       |
| rs117361624  | 11 | 118568427 | T | C | 0.463  | 0.6435 | ++ | 0      | 0.363 | 1 | 0.5469  |
| rs73585234   | 11 | 117618530 | T | C | 0.463  | 0.6435 | +  | 0      | 0     | 0 | 1       |
| rs525485     | 11 | 118555754 | A | G | 0.463  | 0.6436 | -+ | 0      | 0.772 | 1 | 0.3796  |
| rs558781     | 11 | 118564397 | T | G | 0.463  | 0.6436 | -+ | 0      | 0.684 | 1 | 0.4083  |
| rs56363339   | 11 | 119683659 | G | A | -0.462 | 0.6439 | -  | 0      | 0     | 0 | 1       |

|             |    |           |   |   |        |        |   |        |       |   |         |
|-------------|----|-----------|---|---|--------|--------|---|--------|-------|---|---------|
| rs60657131  | 11 | 117679078 | C | T | 0.462  | 0.6439 | + | 0      | 0     | 0 | 1       |
| rs145305155 | 11 | 117330326 | G | A | -0.462 | 0.644  | - | 0      | 0     | 0 | 1       |
| rs638301    | 11 | 118559003 | G | A | 0.462  | 0.644  | + | 0      | 0.8   | 1 | 0.3712  |
| rs117547981 | 11 | 117104900 | A | G | 0.462  | 0.6441 | + | 0      | 0     | 0 | 1       |
| rs510408    | 11 | 118558901 | C | G | 0.462  | 0.6444 | + | 0      | 0.8   | 1 | 0.371   |
| rs561845    | 11 | 118558827 | G | A | 0.462  | 0.6444 | + | 0      | 0.8   | 1 | 0.371   |
| rs638805    | 11 | 118558889 | T | G | 0.462  | 0.6444 | + | 0      | 0.8   | 1 | 0.371   |
| rs75960142  | 11 | 121169052 | C | T | 0.461  | 0.6445 | + | 0      | 0     | 0 | 1       |
| rs10892568  | 11 | 120252828 | G | A | 0.461  | 0.6447 | + | 0      | 0     | 0 | 1       |
| rs117050823 | 11 | 116782202 | G | A | 0.461  | 0.6448 | + | 0      | 0     | 0 | 1       |
| rs626517    | 11 | 120990070 | C | G | -0.461 | 0.6448 | - | 0      | 0     | 0 | 1       |
| rs657405    | 11 | 120989780 | T | C | -0.461 | 0.6448 | - | 0      | 0     | 0 | 1       |
| rs201365537 | 11 | 117138456 | A | G | -0.461 | 0.6449 | - | 0      | 0     | 0 | 1       |
| rs11216083  | 11 | 116537634 | T | C | 0.461  | 0.6451 | + | 0      | 0     | 0 | 1       |
| rs502601    | 11 | 118565679 | A | G | 0.461  | 0.6451 | + | 0      | 0.789 | 1 | 0.3743  |
| rs1145183   | 11 | 116502286 | A | G | -0.46  | 0.6455 | - | 0      | 0     | 0 | 1       |
| rs558593    | 11 | 118562520 | T | C | 0.46   | 0.6455 | + | 0      | 0.752 | 1 | 0.3858  |
| rs4936409   | 11 | 117694392 | G | A | -0.46  | 0.6456 | - | 0      | 0     | 0 | 1       |
| rs4938387   | 11 | 117334519 | A | G | 0.46   | 0.6456 | + | 0      | 0     | 0 | 1       |
| rs6589769   | 11 | 119574060 | G | C | -0.46  | 0.6456 | - | 0      | 0     | 0 | 1       |
| rs7103799   | 11 | 117811563 | T | C | 0.46   | 0.6457 | + | -32.6  | 2.263 | 1 | 0.1325  |
| rs7122174   | 11 | 117842533 | A | T | 0.46   | 0.6457 | + | 0      | 0.004 | 1 | 0.9483  |
| rs6589774   | 11 | 119646732 | A | G | -0.46  | 0.6458 | - | 0      | 0     | 0 | 1       |
| rs61900865  | 11 | 120392401 | T | C | 0.459  | 0.646  | + | 0      | 0     | 0 | 1       |
| rs117268885 | 11 | 117786899 | T | C | -0.459 | 0.6461 | - | 0      | 0     | 0 | 1       |
| rs7942396   | 11 | 121179549 | T | C | 0.459  | 0.6463 | + | 0      | 0     | 0 | 1       |
| rs77654673  | 11 | 119364445 | C | G | 0.459  | 0.6465 | + | 0      | 0     | 0 | 1       |
| rs558582    | 11 | 117328639 | T | C | -0.458 | 0.6467 | - | 0      | 0     | 0 | 1       |
| rs56338557  | 11 | 116409130 | C | T | 0.458  | 0.6468 | + | 0      | 0     | 0 | 1       |
| rs1110703   | 11 | 119974755 | G | A | 0.458  | 0.6469 | + | 0      | 0     | 0 | 1       |
| rs11216486  | 11 | 117524000 | G | T | -0.458 | 0.6469 | - | 0      | 0     | 0 | 1       |
| rs558907    | 11 | 118558455 | G | A | 0.458  | 0.647  | + | 0      | 0.804 | 1 | 0.3699  |
| rs693306    | 11 | 118558333 | G | A | 0.458  | 0.647  | + | 0      | 0.804 | 1 | 0.3699  |
| rs75672383  | 11 | 120790997 | T | C | -0.458 | 0.6472 | - | 0      | 0     | 0 | 1       |
| rs59293325  | 11 | 116327447 | A | G | -0.457 | 0.6476 | - | 0      | 0     | 0 | 1       |
| rs4936433   | 11 | 118552420 | G | A | 0.457  | 0.6477 | + | 0      | 0.831 | 1 | 0.362   |
| rs519848    | 11 | 118552715 | A | G | 0.457  | 0.6477 | + | 0      | 0.831 | 1 | 0.362   |
| rs549370    | 11 | 118552842 | A | C | 0.457  | 0.6477 | + | 0      | 0.831 | 1 | 0.362   |
| rs592280    | 11 | 118553218 | C | T | 0.457  | 0.6477 | + | 0      | 0.831 | 1 | 0.362   |
| rs654792    | 11 | 118552996 | T | G | 0.457  | 0.6477 | + | 0      | 0.831 | 1 | 0.362   |
| rs12291974  | 11 | 117661447 | T | C | 0.456  | 0.6481 | + | 0      | 0     | 1 | 0.9842  |
| rs12577361  | 11 | 117337289 | A | C | -0.456 | 0.6481 | - | 0      | 0     | 0 | 1       |
| rs180352    | 11 | 116606630 | A | G | -0.456 | 0.6481 | + | -2.3   | 2.931 | 1 | 0.08688 |
| rs28989500  | 11 | 117165397 | T | C | -0.456 | 0.6481 | - | 0      | 0     | 0 | 1       |
| rs59138930  | 11 | 118173783 | T | C | 0.456  | 0.6481 | + | 0      | 0     | 0 | 1       |
| rs2845702   | 11 | 120113661 | G | T | -0.456 | 0.6482 | - | 0      | 0     | 0 | 1       |
| rs7933848   | 11 | 119561362 | T | C | 0.456  | 0.6483 | + | 0      | 0     | 0 | 1       |
| rs11218195  | 11 | 121062860 | C | A | -0.456 | 0.6485 | - | 0      | 0     | 0 | 1       |
| rs45555231  | 11 | 116665120 | C | G | 0.456  | 0.6485 | + | 0      | 0     | 0 | 1       |
| rs693037    | 11 | 118553326 | T | C | 0.456  | 0.6485 | + | 0      | 0.815 | 1 | 0.3666  |
| rs9332819   | 11 | 118365263 | T | C | -0.456 | 0.6487 | + | 0      | 0.892 | 1 | 0.345   |
| rs12786590  | 11 | 121161826 | G | A | -0.455 | 0.6488 | - | 0      | 0     | 0 | 1       |
| rs2075290   | 11 | 116653296 | C | T | -0.455 | 0.6488 | + | -75.6  | 1.709 | 1 | 0.1911  |
| rs10790233  | 11 | 117976568 | A | G | -0.455 | 0.6489 | - | 0      | 0     | 1 | 0.9868  |
| rs1715429   | 11 | 118083664 | A | G | 0.455  | 0.6489 | + | 0      | 0     | 0 | 1       |
| rs75128335  | 11 | 118072915 | A | G | 0.455  | 0.6492 | + | -143.4 | 1.232 | 1 | 0.267   |

|             |    |           |   |   |        |        |   |        |       |   |         |
|-------------|----|-----------|---|---|--------|--------|---|--------|-------|---|---------|
| rs117391362 | 11 | 120785542 | A | G | 0.455  | 0.6493 | + | 0      | 0     | 0 | 1       |
| rs118046730 | 11 | 118711376 | C | T | 0.455  | 0.6494 | - | -3.8   | 2.891 | 1 | 0.08906 |
| rs574217358 | 11 | 118559709 | A | G | 0.455  | 0.6494 | - | 0      | 0.808 | 1 | 0.3686  |
| rs753309    | 11 | 120138885 | A | G | -0.455 | 0.6494 | - | 0      | 0     | 0 | 1       |
| rs7926959   | 11 | 118559866 | C | T | 0.455  | 0.6494 | - | 0      | 0.808 | 1 | 0.3686  |
| rs7926970   | 11 | 118559881 | G | T | 0.455  | 0.6494 | - | 0      | 0.808 | 1 | 0.3686  |
| rs1076485   | 11 | 116772441 | T | C | 0.454  | 0.6495 | + | 0      | 0     | 0 | 1       |
| rs10790432  | 11 | 121160519 | C | T | -0.454 | 0.6496 | - | 0      | 0     | 0 | 1       |
| rs486462    | 11 | 118559178 | C | T | 0.454  | 0.6496 | - | 0      | 0.808 | 1 | 0.3688  |
| rs533144    | 11 | 118559247 | A | C | 0.454  | 0.6496 | - | 0      | 0.808 | 1 | 0.3688  |
| rs625918    | 11 | 118559542 | T | C | 0.454  | 0.6496 | - | 0      | 0.808 | 1 | 0.3688  |
| rs7115581   | 11 | 121161041 | A | G | -0.454 | 0.6496 | - | 0      | 0     | 0 | 1       |
| rs7115602   | 11 | 121161106 | A | G | -0.454 | 0.6496 | - | 0      | 0     | 0 | 1       |
| rs518028    | 11 | 118564982 | C | T | 0.454  | 0.6497 | - | 0      | 0.692 | 1 | 0.4056  |
| rs56227539  | 11 | 116964469 | C | T | -0.454 | 0.6497 | - | 0      | 0     | 0 | 1       |
| rs57950207  | 11 | 116620670 | C | T | -0.454 | 0.6497 | - | 0      | 0.055 | 1 | 0.8138  |
| rs77112220  | 11 | 116626226 | T | C | -0.454 | 0.6497 | - | 0      | 0.055 | 1 | 0.8138  |
| rs117792004 | 11 | 120355388 | A | T | -0.454 | 0.6498 | - | 0      | 0     | 0 | 1       |
| rs2071702   | 11 | 118373861 | T | C | -0.454 | 0.6498 | - | -136.4 | 1.269 | 1 | 0.2599  |
| rs487962    | 11 | 116245350 | A | G | -0.454 | 0.6498 | - | 0      | 0     | 0 | 1       |
| rs9332781   | 11 | 118346599 | G | A | -0.454 | 0.6499 | - | 0      | 0.943 | 1 | 0.3316  |
| rs1786185   | 11 | 117922143 | G | A | 0.454  | 0.65   | + | 0      | 0     | 0 | 1       |
| rs508579    | 11 | 118559084 | C | G | 0.454  | 0.65   | - | 0      | 0.808 | 1 | 0.3687  |
| rs518368    | 11 | 117275561 | C | G | -0.454 | 0.65   | - | 0      | 0     | 0 | 1       |
| rs555356    | 11 | 118558078 | T | G | 0.454  | 0.6501 | - | 0      | 0.808 | 1 | 0.3686  |
| rs2513091   | 11 | 116845538 | G | A | -0.453 | 0.6502 | + | 52     | 6.254 | 1 | 0.01239 |
| rs2921655   | 11 | 116836548 | C | G | -0.453 | 0.6502 | + | 52     | 6.254 | 1 | 0.01239 |
| rs493101    | 11 | 116833669 | A | G | -0.453 | 0.6502 | + | 52     | 6.254 | 1 | 0.01239 |
| rs541496    | 11 | 116835362 | T | C | -0.453 | 0.6502 | + | 52     | 6.254 | 1 | 0.01239 |
| rs622302    | 11 | 116831071 | G | A | -0.453 | 0.6502 | + | 52     | 6.254 | 1 | 0.01239 |
| rs667119    | 11 | 116835883 | T | A | -0.453 | 0.6502 | + | 52     | 6.254 | 1 | 0.01239 |
| rs117117915 | 11 | 117113511 | T | C | 0.453  | 0.6505 | + | 0      | 0     | 0 | 1       |
| rs538661    | 11 | 120309851 | T | C | 0.453  | 0.6506 | + | 0      | 0     | 0 | 1       |
| rs11216382  | 11 | 117303858 | C | T | 0.453  | 0.6508 | + | 0      | 0     | 0 | 1       |
| rs35066934  | 11 | 117652665 | T | C | -0.453 | 0.6508 | - | 0      | 0.153 | 1 | 0.6954  |
| rs61903739  | 11 | 117220324 | T | C | -0.453 | 0.6508 | - | 0      | 0     | 0 | 1       |
| rs11215970  | 11 | 116379681 | C | T | -0.453 | 0.6509 | - | 0      | 0     | 0 | 1       |
| rs7116481   | 11 | 120238413 | T | C | 0.453  | 0.6509 | + | 0      | 0     | 0 | 1       |
| rs67859744  | 11 | 118200657 | A | T | 0.452  | 0.651  | + | 0      | 0     | 0 | 1       |
| rs4082031   | 11 | 116227283 | A | T | -0.452 | 0.6513 | - | 0      | 0     | 0 | 1       |
| rs7952521   | 11 | 116385354 | A | G | 0.452  | 0.6515 | + | 0      | 0     | 0 | 1       |
| rs12576486  | 11 | 118235490 | C | T | -0.451 | 0.6517 | - | 0      | 0.299 | 1 | 0.5844  |
| rs12798453  | 11 | 118561410 | G | T | 0.451  | 0.6518 | - | 0      | 0.695 | 1 | 0.4046  |
| rs3132786   | 11 | 118365956 | C | T | 0.451  | 0.6518 | + | 0      | 0     | 1 | 0.9882  |
| rs7945395   | 11 | 119569737 | G | A | -0.451 | 0.6518 | - | 0      | 0     | 0 | 1       |
| rs12796373  | 11 | 118554939 | A | G | 0.451  | 0.6519 | - | 0      | 0.813 | 1 | 0.3674  |
| rs12420972  | 11 | 117337012 | A | G | 0.451  | 0.6521 | + | 0      | 0     | 0 | 1       |
| rs590580    | 11 | 118066104 | A | G | 0.451  | 0.6521 | + | 0      | 0     | 0 | 1       |
| rs7131534   | 11 | 118886656 | A | G | -0.451 | 0.6521 | - | 0      | 0     | 1 | 0.9981  |
| rs2368427   | 11 | 119453770 | C | T | -0.451 | 0.6522 | - | 0      | 0     | 0 | 1       |
| rs10750182  | 11 | 121153455 | A | T | -0.451 | 0.6523 | - | 0      | 0     | 0 | 1       |
| rs10892044  | 11 | 116766899 | C | T | 0.45   | 0.6524 | + | 0      | 0     | 0 | 1       |
| rs11216178  | 11 | 116766390 | T | G | 0.45   | 0.6524 | + | 0      | 0     | 0 | 1       |
| rs2163281   | 11 | 121158682 | A | G | -0.45  | 0.6524 | - | 0      | 0     | 0 | 1       |
| rs516153    | 11 | 118564762 | A | C | 0.45   | 0.6524 | - | 0      | 0.695 | 1 | 0.4044  |
| rs7128047   | 11 | 121156532 | A | G | -0.45  | 0.6524 | - | 0      | 0     | 0 | 1       |

|             |    |           |   |   |        |        |    |       |       |   |        |
|-------------|----|-----------|---|---|--------|--------|----|-------|-------|---|--------|
| rs7128342   | 11 | 121156809 | A | T | -0.45  | 0.6524 | -? | 0     | 0     | 0 | 1      |
| rs74505693  | 11 | 117668721 | A | G | 0.45   | 0.6524 | ++ | 0     | 0.005 | 1 | 0.9436 |
| rs3782040   | 11 | 118176097 | G | A | 0.45   | 0.6526 | +? | 0     | 0     | 0 | 1      |
| rs519982    | 11 | 118565231 | T | C | 0.45   | 0.6527 | -+ | 0     | 0.696 | 1 | 0.4042 |
| rs117170971 | 11 | 116605265 | A | G | -0.449 | 0.6531 | -- | 0     | 0.012 | 1 | 0.9136 |
| rs73577982  | 11 | 117337708 | A | G | 0.449  | 0.6531 | +? | 0     | 0     | 0 | 1      |
| rs10437673  | 11 | 116328809 | A | G | -0.449 | 0.6532 | -? | 0     | 0     | 0 | 1      |
| rs10790379  | 11 | 120221652 | G | A | 0.449  | 0.6532 | +? | 0     | 0     | 0 | 1      |
| rs11215953  | 11 | 116347728 | G | A | -0.449 | 0.6532 | -? | 0     | 0     | 0 | 1      |
| rs656445    | 11 | 118012164 | A | G | 0.449  | 0.6533 | ++ | 0     | 0     | 1 | 0.9834 |
| rs6589872   | 11 | 121158100 | C | T | -0.449 | 0.6533 | -? | 0     | 0     | 0 | 1      |
| rs12277299  | 11 | 119845755 | G | C | -0.449 | 0.6536 | -? | 0     | 0     | 0 | 1      |
| rs12294978  | 11 | 119805884 | A | C | -0.449 | 0.6536 | -? | 0     | 0     | 0 | 1      |
| rs11216162  | 11 | 116728277 | A | G | -0.449 | 0.6537 | -? | 0     | 0     | 0 | 1      |
| rs12417440  | 11 | 117241429 | T | C | -0.448 | 0.6538 | -? | 0     | 0     | 0 | 1      |
| rs569770    | 11 | 118584498 | T | C | 0.448  | 0.6538 | ++ | 0     | 0.46  | 1 | 0.4975 |
| rs6589770   | 11 | 119614499 | G | C | 0.448  | 0.6538 | +? | 0     | 0     | 0 | 1      |
| rs73006720  | 11 | 119609314 | C | A | 0.448  | 0.6538 | +? | 0     | 0     | 0 | 1      |
| rs34033074  | 11 | 119648831 | A | G | -0.448 | 0.654  | -? | 0     | 0     | 0 | 1      |
| rs35904674  | 11 | 116666099 | T | C | -0.448 | 0.654  | -+ | 0     | 0.205 | 1 | 0.6506 |
| rs4388901   | 11 | 119648152 | C | T | -0.448 | 0.654  | -? | 0     | 0     | 0 | 1      |
| rs1349688   | 11 | 119978608 | C | G | 0.448  | 0.6542 | +? | 0     | 0     | 0 | 1      |
| rs4938529   | 11 | 118560569 | T | C | 0.448  | 0.6542 | -+ | 0     | 0.698 | 1 | 0.4036 |
| rs79532870  | 11 | 120636299 | A | G | -0.448 | 0.6542 | -? | 0     | 0     | 0 | 1      |
| rs11216751  | 11 | 117973058 | G | T | 0.448  | 0.6545 | +? | 0     | 0     | 0 | 1      |
| rs6589567   | 11 | 116670676 | A | C | -0.447 | 0.6547 | +- | -21.3 | 2.474 | 1 | 0.1158 |
| rs471227    | 11 | 118564601 | C | T | 0.447  | 0.6548 | -+ | 0     | 0.699 | 1 | 0.4033 |
| rs508640    | 11 | 118564413 | G | A | 0.447  | 0.6548 | -+ | 0     | 0.699 | 1 | 0.4033 |
| rs582630    | 11 | 118562799 | A | C | 0.447  | 0.6548 | -+ | 0     | 0.699 | 1 | 0.4033 |
| rs585039    | 11 | 118563381 | A | C | 0.447  | 0.6548 | -+ | 0     | 0.699 | 1 | 0.4033 |
| rs12278532  | 11 | 120481773 | T | C | 0.447  | 0.6549 | +? | 0     | 0     | 0 | 1      |
| rs73022489  | 11 | 117795838 | A | G | 0.447  | 0.6549 | +- | 0     | 0.961 | 1 | 0.327  |
| rs4938708   | 11 | 119560847 | T | C | 0.447  | 0.6552 | +? | 0     | 0     | 0 | 1      |
| rs4938709   | 11 | 119561042 | A | T | 0.447  | 0.6552 | +? | 0     | 0     | 0 | 1      |
| rs10790401  | 11 | 120557543 | G | A | -0.446 | 0.6556 | -? | 0     | 0     | 0 | 1      |
| rs11217769  | 11 | 120089688 | G | A | 0.446  | 0.6556 | +? | 0     | 0     | 0 | 1      |
| rs12799314  | 11 | 118551597 | A | G | 0.446  | 0.6556 | -+ | 0     | 0.861 | 1 | 0.3535 |
| rs17440396  | 11 | 116621770 | A | G | -0.446 | 0.6556 | -- | 0     | 0.058 | 1 | 0.8102 |
| rs642497    | 11 | 118550784 | A | C | 0.446  | 0.6556 | -+ | 0     | 0.861 | 1 | 0.3535 |
| rs642530    | 11 | 118550756 | C | T | 0.446  | 0.6556 | -+ | 0     | 0.861 | 1 | 0.3535 |
| rs673770    | 11 | 118550601 | G | T | 0.446  | 0.6556 | -+ | 0     | 0.861 | 1 | 0.3535 |
| rs17124945  | 11 | 121068047 | T | C | -0.446 | 0.6559 | -? | 0     | 0     | 0 | 1      |
| rs76693355  | 11 | 120292477 | C | T | -0.446 | 0.6559 | -? | 0     | 0     | 0 | 1      |
| rs10790230  | 11 | 117954384 | A | C | 0.445  | 0.656  | ++ | 0     | 0.081 | 1 | 0.7764 |
| rs1893517   | 11 | 117522237 | A | G | 0.445  | 0.6561 | +? | 0     | 0     | 0 | 1      |
| rs6589864   | 11 | 121109489 | G | A | -0.445 | 0.6561 | -? | 0     | 0     | 0 | 1      |
| rs4614      | 11 | 118952371 | G | A | -0.445 | 0.6562 | -? | 0     | 0     | 0 | 1      |
| rs667982    | 11 | 118562767 | C | T | 0.445  | 0.6564 | -+ | 0     | 0.748 | 1 | 0.3872 |
| rs79255840  | 11 | 119933897 | T | A | 0.445  | 0.6565 | +? | 0     | 0     | 0 | 1      |
| rs7106203   | 11 | 121158551 | A | T | -0.445 | 0.6566 | -? | 0     | 0     | 0 | 1      |
| rs4938524   | 11 | 118552074 | T | G | 0.444  | 0.657  | -+ | 0     | 0.775 | 1 | 0.3788 |
| rs61903660  | 11 | 117113335 | G | A | 0.444  | 0.657  | +? | 0     | 0     | 0 | 1      |
| rs12803325  | 11 | 119643807 | T | A | -0.444 | 0.6571 | -? | 0     | 0     | 0 | 1      |
| rs4420283   | 11 | 119644249 | C | T | -0.444 | 0.6571 | -? | 0     | 0     | 0 | 1      |
| rs4938383   | 11 | 117332917 | C | G | 0.444  | 0.6571 | +? | 0     | 0     | 0 | 1      |
| rs7104562   | 11 | 119577324 | G | A | 0.444  | 0.6571 | +? | 0     | 0     | 0 | 1      |

|             |    |           |   |   |        |        |    |      |       |   |         |
|-------------|----|-----------|---|---|--------|--------|----|------|-------|---|---------|
| rs17123767  | 11 | 120146127 | A | C | -0.444 | 0.6574 | -? | 0    | 0     | 0 | 1       |
| rs557331    | 11 | 116734688 | A | G | -0.444 | 0.6574 | +- | 33.9 | 4.537 | 1 | 0.03317 |
| rs582071    | 11 | 120017875 | A | G | -0.444 | 0.6574 | -? | 0    | 0     | 0 | 1       |
| rs76598600  | 11 | 119738420 | T | C | 0.444  | 0.6574 | +  | 0    | 0     | 0 | 1       |
| rs10892384  | 11 | 119406091 | C | T | -0.443 | 0.6575 | -? | 0    | 0     | 0 | 1       |
| rs45539534  | 11 | 119236192 | T | C | 0.443  | 0.6576 | +  | 0    | 0     | 0 | 1       |
| rs11820814  | 11 | 116765700 | C | T | 0.443  | 0.6577 | +  | 0    | 0     | 0 | 1       |
| rs625790    | 11 | 119358835 | C | T | 0.443  | 0.6578 | +  | 0    | 0     | 0 | 1       |
| rs4938807   | 11 | 120331701 | A | C | 0.443  | 0.658  | +  | 0    | 0     | 0 | 1       |
| rs59097294  | 11 | 116964437 | C | T | -0.443 | 0.658  | -? | 0    | 0     | 0 | 1       |
| rs10466595  | 11 | 119989107 | G | C | -0.443 | 0.6581 | -? | 0    | 0     | 0 | 1       |
| rs41460849  | 11 | 120104859 | A | G | -0.443 | 0.6581 | -? | 0    | 0     | 0 | 1       |
| rs73578234  | 11 | 120146707 | T | C | -0.442 | 0.6582 | -? | 0    | 0     | 0 | 1       |
| rs12364375  | 11 | 117317941 | T | A | 0.442  | 0.6585 | +  | 0    | 0     | 0 | 1       |
| rs76377040  | 11 | 117666548 | G | C | 0.442  | 0.6586 | ++ | 0    | 0.009 | 1 | 0.9226  |
| rs7111290   | 11 | 119574140 | G | A | -0.442 | 0.6587 | -? | 0    | 0     | 0 | 1       |
| rs10790327  | 11 | 119500417 | T | C | -0.442 | 0.6588 | -? | 0    | 0     | 0 | 1       |
| rs73011187  | 11 | 116469461 | T | C | -0.441 | 0.6589 | -? | 0    | 0     | 0 | 1       |
| rs73014332  | 11 | 117201404 | G | A | 0.441  | 0.6589 | +  | 0    | 0     | 0 | 1       |
| rs45584835  | 11 | 118004863 | G | A | 0.441  | 0.659  | ++ | 0    | 0.006 | 1 | 0.9386  |
| rs11216475  | 11 | 117500025 | T | C | -0.441 | 0.6592 | -? | 0    | 0     | 0 | 1       |
| rs3902806   | 11 | 119572051 | G | T | -0.441 | 0.6592 | -? | 0    | 0     | 0 | 1       |
| rs10750183  | 11 | 121154721 | A | G | -0.441 | 0.6593 | -? | 0    | 0     | 0 | 1       |
| rs10892612  | 11 | 120553182 | A | G | -0.441 | 0.6593 | -? | 0    | 0     | 0 | 1       |
| rs1583124   | 11 | 121154941 | G | A | -0.441 | 0.6593 | -? | 0    | 0     | 0 | 1       |
| rs2513092   | 11 | 116844279 | C | T | -0.441 | 0.6593 | +- | 52.3 | 6.29  | 1 | 0.01214 |
| rs6589870   | 11 | 121153921 | G | A | -0.441 | 0.6593 | -? | 0    | 0     | 0 | 1       |
| rs61906076  | 11 | 116521505 | G | C | 0.441  | 0.6595 | +  | 0    | 0     | 0 | 1       |
| rs582800    | 11 | 120861967 | C | T | -0.44  | 0.6596 | +  | 0    | 0.389 | 1 | 0.533   |
| rs486476    | 11 | 116312926 | G | C | -0.44  | 0.6597 | -? | 0    | 0     | 0 | 1       |
| rs117889729 | 11 | 120979833 | G | C | 0.44   | 0.6598 | +  | 0    | 0     | 0 | 1       |
| rs12222405  | 11 | 120090344 | T | C | 0.44   | 0.6601 | +  | 0    | 0     | 0 | 1       |
| rs12223954  | 11 | 120090552 | C | T | 0.44   | 0.6601 | +  | 0    | 0     | 0 | 1       |
| rs11217415  | 11 | 119574609 | C | T | -0.44  | 0.6602 | -? | 0    | 0     | 0 | 1       |
| rs12796257  | 11 | 119830778 | C | T | -0.439 | 0.6603 | -? | 0    | 0     | 0 | 1       |
| rs11216498  | 11 | 117552437 | G | A | 0.439  | 0.6605 | +  | 0    | 0     | 0 | 1       |
| rs1261706   | 11 | 116819991 | A | T | -0.439 | 0.6605 | +- | 52.3 | 6.295 | 1 | 0.01211 |
| rs3133352   | 11 | 116818187 | A | G | -0.439 | 0.6605 | +- | 52.3 | 6.295 | 1 | 0.01211 |
| rs587703    | 11 | 116827565 | G | A | -0.439 | 0.6605 | +- | 52.3 | 6.295 | 1 | 0.01211 |
| rs56129109  | 11 | 120594279 | C | A | -0.439 | 0.6607 | +- | 0    | 0.912 | 1 | 0.3395  |
| rs7119027   | 11 | 120142525 | G | A | -0.439 | 0.6608 | -? | 0    | 0     | 0 | 1       |
| rs682109    | 11 | 116673149 | T | C | -0.439 | 0.6609 | +  | 8.2  | 3.267 | 1 | 0.07069 |
| rs2444240   | 11 | 120040442 | G | T | -0.439 | 0.661  | -? | 0    | 0     | 0 | 1       |
| rs10466532  | 11 | 116407823 | C | T | 0.438  | 0.6611 | +  | 0    | 0     | 0 | 1       |
| rs7103982   | 11 | 120397775 | T | C | 0.438  | 0.6611 | +  | 0    | 0     | 0 | 1       |
| rs72999491  | 11 | 118539151 | A | G | -0.438 | 0.6611 | -? | 0    | 0     | 0 | 1       |
| rs1783839   | 11 | 117905405 | C | T | -0.438 | 0.6613 | +- | 0    | 0.626 | 1 | 0.4286  |
| rs67435655  | 11 | 118196399 | C | T | 0.438  | 0.6613 | +  | 0    | 0     | 0 | 1       |
| rs10790397  | 11 | 120551569 | A | C | -0.438 | 0.6614 | -? | 0    | 0     | 0 | 1       |
| rs11217267  | 11 | 119263703 | C | T | -0.438 | 0.6614 | -? | 0    | 0     | 0 | 1       |
| rs4938268   | 11 | 116272339 | G | A | 0.438  | 0.6614 | +  | 0    | 0     | 0 | 1       |
| rs544201    | 11 | 119702015 | A | T | 0.438  | 0.6614 | +  | 0    | 0     | 0 | 1       |
| rs11217863  | 11 | 120293138 | A | G | -0.438 | 0.6617 | -? | 0    | 0     | 0 | 1       |
| rs117498846 | 11 | 117255837 | A | G | 0.437  | 0.6621 | +  | 0    | 0     | 0 | 1       |
| rs45558732  | 11 | 118402962 | T | G | 0.437  | 0.6621 | ++ | 0    | 0.033 | 1 | 0.8568  |
| rs12277700  | 11 | 119236692 | A | C | 0.437  | 0.6622 | +  | 0    | 0     | 0 | 1       |

|             |    |           |   |   |        |        |    |        |       |   |         |
|-------------|----|-----------|---|---|--------|--------|----|--------|-------|---|---------|
| rs640411    | 11 | 116725303 | C | G | -0.437 | 0.6623 | +- | 43.7   | 5.333 | 1 | 0.02092 |
| rs11216591  | 11 | 117732007 | T | A | -0.437 | 0.6624 | -? | 0      | 0     | 0 | 1       |
| rs2851718   | 11 | 119995447 | C | T | 0.436  | 0.6625 | +- | 0      | 0     | 0 | 1       |
| rs2852229   | 11 | 120604533 | A | G | 0.436  | 0.6629 | +- | 0      | 0     | 0 | 1       |
| rs11217551  | 11 | 119749812 | T | G | 0.436  | 0.6631 | +- | 0      | 0     | 0 | 1       |
| rs10790335  | 11 | 119572905 | C | T | -0.435 | 0.6633 | -? | 0      | 0     | 0 | 1       |
| rs509566    | 11 | 120801460 | T | A | 0.435  | 0.6633 | +- | 0      | 0     | 0 | 1       |
| rs45460396  | 11 | 118005622 | G | T | 0.435  | 0.6635 | ++ | 0      | 0.005 | 1 | 0.9441  |
| rs11217414  | 11 | 119574558 | C | T | -0.435 | 0.6636 | -? | 0      | 0     | 0 | 1       |
| rs692750    | 11 | 118538308 | T | G | 0.435  | 0.6636 | -+ | 0      | 0.694 | 1 | 0.4049  |
| rs112900272 | 11 | 118326445 | T | C | -0.435 | 0.6638 | -+ | 0      | 0.932 | 1 | 0.3343  |
| rs78865628  | 11 | 119835382 | C | T | -0.435 | 0.6638 | -? | 0      | 0     | 0 | 1       |
| rs10892500  | 11 | 119816075 | T | C | -0.435 | 0.6639 | -? | 0      | 0     | 0 | 1       |
| rs35585361  | 11 | 117337965 | A | G | 0.434  | 0.664  | +- | 0      | 0     | 0 | 1       |
| rs6589566   | 11 | 116652423 | G | A | -0.434 | 0.6642 | +- | -117.2 | 1.381 | 1 | 0.2399  |
| rs7483863   | 11 | 116652491 | A | G | -0.434 | 0.6642 | +- | -117.2 | 1.381 | 1 | 0.2399  |
| rs12294669  | 11 | 118041972 | G | A | 0.434  | 0.6643 | +- | 0      | 0.288 | 1 | 0.5914  |
| rs12575015  | 11 | 118197645 | T | A | 0.434  | 0.6644 | +- | 0      | 0     | 0 | 1       |
| rs66962317  | 11 | 118197486 | C | T | 0.434  | 0.6644 | +- | 0      | 0     | 0 | 1       |
| rs10892588  | 11 | 120488347 | A | G | 0.434  | 0.6645 | +- | 0      | 0     | 0 | 1       |
| rs58136657  | 11 | 119610490 | T | C | 0.434  | 0.6646 | +- | 0      | 0     | 0 | 1       |
| rs12418040  | 11 | 120126782 | A | G | -0.433 | 0.6647 | -? | 0      | 0     | 0 | 1       |
| rs2155824   | 11 | 119166280 | A | T | 0.433  | 0.6647 | ++ | 0      | 0.385 | 1 | 0.535   |
| rs10892453  | 11 | 119636367 | T | C | -0.433 | 0.6648 | -? | 0      | 0     | 0 | 1       |
| rs543480    | 11 | 117771069 | T | C | -0.433 | 0.6649 | -? | 0      | 0     | 0 | 1       |
| rs1939673   | 11 | 120618079 | C | T | 0.433  | 0.6653 | +- | 0      | 0     | 0 | 1       |
| rs10160554  | 11 | 117646824 | G | A | 0.432  | 0.6654 | +- | 0      | 0     | 0 | 1       |
| rs4938741   | 11 | 119827163 | C | T | 0.432  | 0.6657 | +- | 0      | 0     | 0 | 1       |
| rs61902683  | 11 | 120555070 | G | T | 0.432  | 0.6658 | +- | 0      | 0     | 0 | 1       |
| rs885429    | 11 | 119572571 | T | G | -0.432 | 0.6658 | -? | 0      | 0     | 0 | 1       |
| rs2846122   | 11 | 120605140 | A | G | 0.432  | 0.6659 | +- | 0      | 0     | 0 | 1       |
| rs3863313   | 11 | 117312602 | G | T | -0.432 | 0.6659 | -? | 0      | 0     | 0 | 1       |
| rs17453205  | 11 | 117801635 | G | A | 0.432  | 0.666  | +- | 0      | 0     | 0 | 1       |
| rs11218175  | 11 | 121041146 | G | T | -0.432 | 0.6661 | -? | 0      | 0     | 0 | 1       |
| rs12577602  | 11 | 120755218 | T | G | -0.431 | 0.6662 | -? | 0      | 0     | 0 | 1       |
| rs686977    | 11 | 117544475 | C | T | -0.431 | 0.6662 | -? | 0      | 0     | 0 | 1       |
| rs11217875  | 11 | 120325559 | A | C | 0.431  | 0.6663 | +- | 0      | 0     | 0 | 1       |
| rs4482033   | 11 | 120713654 | G | A | 0.431  | 0.6663 | +- | 0      | 0     | 0 | 1       |
| rs7121233   | 11 | 120717153 | C | T | 0.431  | 0.6665 | +- | 0      | 0     | 0 | 1       |
| rs7952068   | 11 | 120693133 | G | C | 0.431  | 0.6665 | +- | 0      | 0     | 0 | 1       |
| rs4457755   | 11 | 121150625 | G | A | 0.431  | 0.6666 | +- | 0      | 0     | 0 | 1       |
| rs2249466   | 11 | 119181170 | T | C | -0.431 | 0.6668 | -? | 0      | 0     | 0 | 1       |
| rs11216755  | 11 | 117974937 | C | T | -0.43  | 0.6669 | -+ | 0      | 0.636 | 1 | 0.425   |
| rs582340    | 11 | 119956964 | A | G | 0.43   | 0.667  | +- | 0      | 0     | 0 | 1       |
| rs647437    | 11 | 119879217 | C | T | 0.43   | 0.667  | +- | 0      | 0     | 0 | 1       |
| rs74597362  | 11 | 121189853 | A | G | -0.43  | 0.667  | -? | 0      | 0     | 0 | 1       |
| rs11217529  | 11 | 119701941 | A | G | -0.43  | 0.6674 | -? | 0      | 0     | 0 | 1       |
| rs141734119 | 11 | 120872163 | G | A | 0.43   | 0.6675 | +- | 0      | 0     | 0 | 1       |
| rs76368626  | 11 | 119465670 | C | T | 0.43   | 0.6675 | +- | 0      | 0     | 0 | 1       |
| rs111405302 | 11 | 118385691 | C | T | -0.43  | 0.6676 | -+ | -135.2 | 1.275 | 1 | 0.2588  |
| rs111748140 | 11 | 119872269 | T | C | 0.429  | 0.6676 | +- | 0      | 0     | 0 | 1       |
| rs10892187  | 11 | 117732806 | A | G | -0.429 | 0.6682 | -? | 0      | 0     | 0 | 1       |
| rs11600071  | 11 | 119593452 | G | A | 0.428  | 0.6684 | +- | 0      | 0     | 0 | 1       |
| rs45531834  | 11 | 118096459 | T | C | 0.428  | 0.6685 | +- | 0      | 0     | 0 | 1       |
| rs523715    | 11 | 118574188 | A | G | 0.428  | 0.6685 | +- | 0      | 0     | 0 | 1       |
| rs562089    | 11 | 117710118 | C | A | -0.428 | 0.6685 | -? | 0      | 0     | 0 | 1       |

|             |    |           |   |   |        |        |    |        |       |   |          |
|-------------|----|-----------|---|---|--------|--------|----|--------|-------|---|----------|
| rs687664    | 11 | 118574185 | A | C | 0.428  | 0.6685 | +  | 0      | 0     | 0 | 1        |
| rs868344    | 11 | 118005119 | C | T | 0.428  | 0.6685 | ++ | 0      | 0.005 | 1 | 0.9445   |
| rs10892201  | 11 | 117848292 | T | C | -0.428 | 0.6686 | -- | 0      | 0.468 | 1 | 0.4938   |
| rs113488707 | 11 | 118045876 | T | C | -0.428 | 0.6686 | -? | 0      | 0     | 0 | 1        |
| rs12278678  | 11 | 120481866 | A | G | 0.428  | 0.6686 | +  | 0      | 0     | 0 | 1        |
| rs79315770  | 11 | 116510542 | A | T | -0.428 | 0.6686 | -? | 0      | 0     | 0 | 1        |
| rs112473235 | 11 | 120599666 | T | C | -0.428 | 0.6687 | -? | 0      | 0     | 0 | 1        |
| rs2276045   | 11 | 118365168 | A | G | -0.428 | 0.6688 | -+ | -169   | 1.115 | 1 | 0.2909   |
| rs7101835   | 11 | 117737359 | G | A | 0.428  | 0.6688 | +  | 0      | 0     | 0 | 1        |
| rs9332809   | 11 | 118361472 | A | G | -0.428 | 0.6688 | -+ | -169   | 1.115 | 1 | 0.2909   |
| rs478371    | 11 | 118565336 | A | G | 0.428  | 0.6689 | -+ | 0      | 0.717 | 1 | 0.397    |
| rs12420386  | 11 | 116527281 | A | C | 0.427  | 0.6691 | +  | 0      | 0     | 0 | 1        |
| rs66553012  | 11 | 120067624 | G | A | 0.427  | 0.6691 | +  | 0      | 0     | 0 | 1        |
| rs4502019   | 11 | 116502834 | G | C | 0.427  | 0.6692 | +  | 0      | 0     | 0 | 1        |
| rs147710439 | 11 | 119481969 | A | G | -0.427 | 0.6693 | -? | 0      | 0     | 0 | 1        |
| rs77159892  | 11 | 116436761 | A | C | 0.427  | 0.6693 | ++ | 0      | 0.07  | 1 | 0.792    |
| rs546890    | 11 | 118557198 | C | T | 0.427  | 0.6694 | -+ | 0      | 0.727 | 1 | 0.3939   |
| rs117639653 | 11 | 117113478 | C | G | -0.427 | 0.6695 | -? | 0      | 0     | 0 | 1        |
| rs3020100   | 11 | 120666931 | G | A | 0.427  | 0.6696 | +  | 0      | 0     | 0 | 1        |
| rs113712143 | 11 | 116817785 | A | G | -0.427 | 0.6697 | +- | 52.6   | 6.331 | 1 | 0.01186  |
| rs2441218   | 11 | 116854580 | G | T | -0.427 | 0.6697 | +- | 52.6   | 6.331 | 1 | 0.01186  |
| rs4935754   | 11 | 120708690 | G | A | 0.427  | 0.6697 | +  | 0      | 0     | 0 | 1        |
| rs537431    | 11 | 116856179 | C | T | -0.427 | 0.6697 | +- | 52.6   | 6.331 | 1 | 0.01186  |
| rs548215    | 11 | 120019335 | A | G | 0.427  | 0.6697 | +  | 0      | 0     | 0 | 1        |
| rs560897    | 11 | 116862087 | T | C | -0.427 | 0.6697 | +- | 52.6   | 6.331 | 1 | 0.01186  |
| rs569568    | 11 | 116857400 | C | T | -0.427 | 0.6697 | +- | 52.6   | 6.331 | 1 | 0.01186  |
| rs607756    | 11 | 116862718 | C | T | -0.427 | 0.6697 | +- | 52.6   | 6.331 | 1 | 0.01186  |
| rs623423    | 11 | 116861519 | C | G | -0.427 | 0.6697 | +- | 52.6   | 6.331 | 1 | 0.01186  |
| rs638392    | 11 | 116860456 | A | T | -0.427 | 0.6697 | +- | 52.6   | 6.331 | 1 | 0.01186  |
| rs649084    | 11 | 116815769 | A | G | -0.427 | 0.6697 | +- | 52.6   | 6.331 | 1 | 0.01186  |
| rs73022490  | 11 | 117795859 | A | G | 0.427  | 0.6697 | +- | 0      | 0.938 | 1 | 0.3328   |
| rs6589563   | 11 | 116590787 | A | G | -0.426 | 0.6698 | +- | -92.1  | 1.561 | 1 | 0.2115   |
| rs619473    | 11 | 119342115 | C | A | 0.426  | 0.67   | -+ | -62.9  | 1.842 | 1 | 0.1747   |
| rs17491207  | 11 | 116400897 | A | G | -0.426 | 0.6702 | -? | 0      | 0     | 0 | 1        |
| rs73555296  | 11 | 118445559 | T | G | -0.426 | 0.6702 | -- | 0      | 0     | 1 | 0.9994   |
| rs495033    | 11 | 116352622 | C | T | 0.426  | 0.6703 | +  | 0      | 0     | 0 | 1        |
| rs11828220  | 11 | 118579395 | A | T | 0.426  | 0.6704 | ++ | 0      | 0.133 | 1 | 0.7156   |
| rs491575    | 11 | 116325442 | T | G | 0.425  | 0.6705 | +  | 0      | 0     | 0 | 1        |
| rs4938392   | 11 | 117359386 | T | C | -0.425 | 0.6705 | -? | 0      | 0     | 0 | 1        |
| rs74833570  | 11 | 117573319 | T | G | 0.425  | 0.6705 | +  | 0      | 0     | 0 | 1        |
| rs117432935 | 11 | 116927976 | A | G | -0.425 | 0.6708 | -+ | 69     | 9.684 | 1 | 0.001859 |
| rs75582303  | 11 | 116928302 | C | T | -0.425 | 0.6708 | -+ | 69     | 9.684 | 1 | 0.001859 |
| rs78111243  | 11 | 116925898 | C | T | -0.425 | 0.6708 | -+ | 69     | 9.684 | 1 | 0.001859 |
| rs573971    | 11 | 118393396 | A | G | 0.425  | 0.6709 | ++ | 0      | 0.034 | 1 | 0.8528   |
| rs34166664  | 11 | 116216072 | G | C | 0.424  | 0.6713 | +- | -100.5 | 1.497 | 1 | 0.2212   |
| rs61903743  | 11 | 117238526 | T | A | -0.424 | 0.6713 | -? | 0      | 0     | 0 | 1        |
| rs61903744  | 11 | 117240002 | T | C | -0.424 | 0.6713 | -? | 0      | 0     | 0 | 1        |
| rs61903745  | 11 | 117240214 | T | G | -0.424 | 0.6713 | -? | 0      | 0     | 0 | 1        |
| rs4938500   | 11 | 118166212 | A | C | 0.424  | 0.6714 | +  | 0      | 0     | 0 | 1        |
| rs150758276 | 11 | 117085874 | C | G | -0.424 | 0.6719 | -? | 0      | 0     | 0 | 1        |
| rs61905108  | 11 | 116624601 | A | C | -0.423 | 0.672  | +- | -160.9 | 1.15  | 1 | 0.2836   |
| rs75619771  | 11 | 119833476 | C | T | -0.423 | 0.672  | -? | 0      | 0     | 0 | 1        |
| rs7118517   | 11 | 120166539 | C | T | 0.423  | 0.6722 | +  | 0      | 0     | 0 | 1        |
| rs948100    | 11 | 117660275 | G | C | 0.423  | 0.6722 | ++ | 0      | 0     | 1 | 0.9994   |
| rs503473    | 11 | 120355230 | G | A | 0.423  | 0.6724 | +  | 0      | 0     | 0 | 1        |
| rs17490647  | 11 | 116351099 | C | A | 0.423  | 0.6726 | +  | 0      | 0     | 0 | 1        |

|             |    |           |   |   |        |        |    |       |       |   |          |
|-------------|----|-----------|---|---|--------|--------|----|-------|-------|---|----------|
| rs12797329  | 11 | 120948832 | G | T | 0.422  | 0.6727 | +  | 0     | 0     | 0 | 1        |
| rs7944487   | 11 | 119192956 | G | A | 0.422  | 0.6727 | +  | 0     | 0     | 0 | 1        |
| rs10892234  | 11 | 118194571 | G | A | -0.422 | 0.6728 | -- | 0     | 0.17  | 1 | 0.6803   |
| rs2004901   | 11 | 120608816 | C | T | 0.422  | 0.6728 | +  | 0     | 0     | 0 | 1        |
| rs79886324  | 11 | 116585444 | A | G | -0.422 | 0.6728 | -- | 0     | 0.012 | 1 | 0.9134   |
| rs4589335   | 11 | 118539140 | T | C | 0.422  | 0.6729 | -+ | 0     | 0.706 | 1 | 0.4008   |
| rs117857960 | 11 | 116924439 | C | T | -0.422 | 0.6731 | -+ | 69.1  | 9.717 | 1 | 0.001826 |
| rs143856824 | 11 | 116922585 | A | C | -0.422 | 0.6731 | -+ | 69.1  | 9.717 | 1 | 0.001826 |
| rs3903091   | 11 | 117348145 | C | T | -0.422 | 0.6731 | -? | 0     | 0     | 0 | 1        |
| rs11217874  | 11 | 120325548 | A | G | 0.422  | 0.6733 | +  | 0     | 0     | 0 | 1        |
| rs11217256  | 11 | 119236590 | G | C | 0.421  | 0.6735 | +  | 0     | 0     | 0 | 1        |
| rs2663620   | 11 | 119427293 | A | G | 0.421  | 0.6736 | +  | 0     | 0     | 0 | 1        |
| rs143315658 | 11 | 116592248 | C | T | -0.421 | 0.6738 | -- | 0     | 0.012 | 1 | 0.9127   |
| rs2845664   | 11 | 119425258 | C | A | 0.421  | 0.6738 | +  | 0     | 0     | 0 | 1        |
| rs4935753   | 11 | 120704184 | C | G | 0.421  | 0.6738 | +  | 0     | 0     | 0 | 1        |
| rs1318166   | 11 | 118171058 | G | A | 0.421  | 0.6739 | +  | 0     | 0     | 0 | 1        |
| rs76758319  | 11 | 121192247 | A | G | -0.421 | 0.6739 | -? | 0     | 0     | 0 | 1        |
| rs61900866  | 11 | 120392508 | G | T | 0.42   | 0.6742 | +  | 0     | 0     | 0 | 1        |
| rs10502246  | 11 | 120924200 | C | T | 0.42   | 0.6745 | +  | 0     | 0     | 0 | 1        |
| rs7941217   | 11 | 118349247 | T | C | -0.42  | 0.6746 | -+ | 0     | 0.844 | 1 | 0.3583   |
| rs2186699   | 11 | 120667742 | G | T | 0.42   | 0.6747 | +  | 0     | 0     | 0 | 1        |
| rs625524    | 11 | 116674503 | A | G | 0.42   | 0.6747 | +  | 0     | 0     | 0 | 1        |
| rs139322068 | 11 | 118121180 | G | T | 0.42   | 0.6748 | -+ | -22.1 | 2.457 | 1 | 0.117    |
| rs55837479  | 11 | 116327971 | A | G | -0.419 | 0.675  | -? | 0     | 0     | 0 | 1        |
| rs76835919  | 11 | 117795852 | G | C | 0.419  | 0.675  | +- | 0     | 0.93  | 1 | 0.3349   |
| rs201373950 | 11 | 118463221 | A | T | 0.419  | 0.6755 | +- | 0     | 0.216 | 1 | 0.642    |
| rs11599994  | 11 | 116383064 | A | G | -0.418 | 0.6759 | -? | 0     | 0     | 0 | 1        |
| rs4252307   | 11 | 117863888 | G | C | 0.418  | 0.6761 | +  | 0     | 0     | 0 | 1        |
| rs9735421   | 11 | 118447597 | A | G | 0.418  | 0.6762 | +- | 0     | 0.201 | 1 | 0.6538   |
| rs9736327   | 11 | 118447580 | G | T | 0.418  | 0.6762 | +- | 0     | 0.201 | 1 | 0.6538   |
| rs471909    | 11 | 119713257 | T | A | -0.418 | 0.6763 | -? | 0     | 0     | 0 | 1        |
| rs17540708  | 11 | 118150127 | G | T | -0.417 | 0.6765 | -+ | 13.2  | 3.456 | 1 | 0.06302  |
| rs7947950   | 11 | 117312089 | G | A | -0.417 | 0.6765 | -? | 0     | 0     | 0 | 1        |
| rs562313    | 11 | 118548421 | A | G | 0.417  | 0.6767 | -+ | 0     | 0.769 | 1 | 0.3805   |
| rs600969    | 11 | 118545797 | T | C | 0.417  | 0.6767 | -+ | 0     | 0.769 | 1 | 0.3805   |
| rs7938877   | 11 | 117410237 | T | C | -0.417 | 0.6767 | -? | 0     | 0     | 0 | 1        |
| rs12797404  | 11 | 120927789 | A | G | 0.417  | 0.677  | +  | 0     | 0     | 0 | 1        |
| rs61905269  | 11 | 117309581 | A | G | 0.416  | 0.6772 | +  | 0     | 0     | 0 | 1        |
| rs35351462  | 11 | 119613090 | A | C | -0.416 | 0.6773 | -? | 0     | 0     | 0 | 1        |
| rs76523703  | 11 | 116749509 | G | T | 0.416  | 0.6773 | +  | 0     | 0     | 0 | 1        |
| rs6589755   | 11 | 119420401 | T | C | 0.416  | 0.6774 | +  | 0     | 0     | 0 | 1        |
| rs61905067  | 11 | 116578982 | G | A | 0.416  | 0.6776 | +  | 0     | 0     | 0 | 1        |
| rs10892359  | 11 | 119263794 | A | G | -0.416 | 0.6777 | -? | 0     | 0     | 0 | 1        |
| rs180348    | 11 | 116611995 | A | G | -0.415 | 0.6779 | -+ | -5.1  | 2.856 | 1 | 0.09105  |
| rs7116797   | 11 | 116707338 | A | G | 0.415  | 0.6781 | +  | 0     | 0     | 0 | 1        |
| rs12420591  | 11 | 120061195 | G | A | 0.415  | 0.6783 | +  | 0     | 0     | 0 | 1        |
| rs4077910   | 11 | 120749741 | T | C | -0.415 | 0.6783 | -? | 0     | 0     | 0 | 1        |
| rs117133249 | 11 | 116524965 | A | G | -0.415 | 0.6784 | -? | 0     | 0     | 0 | 1        |
| rs67674314  | 11 | 117757116 | C | T | -0.415 | 0.6784 | -? | 0     | 0     | 0 | 1        |
| rs2015078   | 11 | 119575185 | C | T | -0.415 | 0.6785 | -? | 0     | 0     | 0 | 1        |
| rs4938442   | 11 | 117734224 | T | C | -0.414 | 0.6786 | -? | 0     | 0     | 0 | 1        |
| rs642673    | 11 | 117118204 | A | T | 0.414  | 0.6786 | +  | 0     | 0     | 0 | 1        |
| rs11217673  | 11 | 119946041 | T | G | -0.414 | 0.6787 | -? | 0     | 0     | 0 | 1        |
| rs34211230  | 11 | 119462879 | A | G | 0.414  | 0.6787 | +  | 0     | 0     | 0 | 1        |
| rs749688    | 11 | 117984995 | C | T | -0.414 | 0.6789 | -- | 0     | 0.013 | 1 | 0.909    |
| rs10502223  | 11 | 116869827 | C | T | -0.414 | 0.679  | +- | 52.9  | 6.368 | 1 | 0.01162  |

|              |    |           |   |   |        |        |    |        |       |   |         |
|--------------|----|-----------|---|---|--------|--------|----|--------|-------|---|---------|
| rs12799683   | 11 | 116232173 | A | G | -0.414 | 0.679  | +- | 0      | 0.989 | 1 | 0.3199  |
| rs73594128   | 11 | 116866609 | C | T | -0.414 | 0.679  | +- | 52.9   | 6.368 | 1 | 0.01162 |
| rs925152     | 11 | 116413688 | T | G | 0.414  | 0.679  | ++ | 0      | 0.275 | 1 | 0.5999  |
| rs12294259   | 11 | 116637146 | T | C | -0.414 | 0.6792 | +- | -75.3  | 1.711 | 1 | 0.1908  |
| rs77564847   | 11 | 116955831 | C | T | -0.414 | 0.6792 | +- | 52.9   | 6.369 | 1 | 0.01161 |
| rs12146701   | 11 | 116403238 | G | T | 0.413  | 0.6794 | +  | 0      | 0     | 0 | 1       |
| rs11216844   | 11 | 118162796 | G | A | 0.413  | 0.6796 | +  | 0      | 0     | 0 | 1       |
| rs654018     | 11 | 119343580 | A | G | 0.413  | 0.6797 | -+ | -56.6  | 1.916 | 1 | 0.1663  |
| rs7947520    | 11 | 120539020 | A | G | -0.413 | 0.6797 | -? | 0      | 0     | 0 | 1       |
| rs4252306    | 11 | 117863730 | C | G | 0.413  | 0.6798 | +  | 0      | 0     | 0 | 1       |
| rs538936     | 11 | 120980822 | A | G | -0.413 | 0.6798 | -? | 0      | 0     | 0 | 1       |
| rs551141     | 11 | 116480631 | A | G | 0.413  | 0.6798 | +  | 0      | 0     | 0 | 1       |
| rs12283803   | 11 | 119799765 | T | C | 0.413  | 0.6799 | +  | 0      | 0     | 0 | 1       |
| rs1942923    | 11 | 117554061 | C | T | 0.413  | 0.6799 | +  | 0      | 0     | 0 | 1       |
| rs1233266397 | 11 | 117334393 | C | T | 0.412  | 0.6801 | +  | 0      | 0     | 0 | 1       |
| rs7925897    | 11 | 117986152 | C | A | 0.412  | 0.6801 | ++ | 0      | 0.013 | 1 | 0.9076  |
| rs7937037    | 11 | 120706789 | C | G | 0.412  | 0.6804 | +  | 0      | 0     | 0 | 1       |
| rs10892412   | 11 | 119459317 | C | T | 0.412  | 0.6806 | +  | 0      | 0     | 0 | 1       |
| rs2187557    | 11 | 118148271 | T | C | 0.412  | 0.6807 | +  | 0      | 0     | 0 | 1       |
| rs2187126    | 11 | 116635784 | G | A | -0.411 | 0.6808 | -- | 0      | 0.068 | 1 | 0.7948  |
| rs10892301   | 11 | 118735476 | A | G | 0.411  | 0.6809 | ++ | 0      | 0.135 | 1 | 0.7129  |
| rs79436592   | 11 | 119762339 | A | G | 0.411  | 0.6811 | +  | 0      | 0     | 0 | 1       |
| rs7350537    | 11 | 116438159 | T | C | 0.411  | 0.6812 | ++ | 0      | 0.01  | 1 | 0.9217  |
| rs4554895    | 11 | 121010539 | A | C | 0.411  | 0.6813 | +  | 0      | 0     | 0 | 1       |
| rs4938301    | 11 | 116575473 | A | G | -0.411 | 0.6813 | -? | 0      | 0     | 0 | 1       |
| rs746910     | 11 | 117444044 | G | A | 0.411  | 0.6814 | +  | 0      | 0     | 0 | 1       |
| rs55843215   | 11 | 118195962 | C | T | 0.41   | 0.6815 | +  | 0      | 0     | 0 | 1       |
| rs7946423    | 11 | 116503403 | T | A | 0.41   | 0.6815 | +  | 0      | 0     | 0 | 1       |
| rs4317991    | 11 | 120696839 | A | G | 0.41   | 0.6816 | +  | 0      | 0     | 0 | 1       |
| rs2852231    | 11 | 120605882 | C | T | 0.41   | 0.6817 | +  | 0      | 0     | 0 | 1       |
| rs3935406    | 11 | 119572185 | G | A | -0.41  | 0.6817 | -? | 0      | 0     | 0 | 1       |
| rs725524     | 11 | 116510369 | A | G | -0.41  | 0.6818 | -? | 0      | 0     | 0 | 1       |
| rs10892216   | 11 | 117979744 | C | A | -0.41  | 0.6819 | -- | 0      | 0     | 1 | 0.9938  |
| rs520176     | 11 | 116471690 | T | C | -0.41  | 0.6819 | -? | 0      | 0     | 0 | 1       |
| rs79110162   | 11 | 116643011 | G | A | -0.41  | 0.6819 | -- | 0      | 0.081 | 1 | 0.7754  |
| rs11216845   | 11 | 118163216 | T | C | 0.41   | 0.6821 | +  | 0      | 0     | 0 | 1       |
| rs10892217   | 11 | 117979814 | C | T | -0.409 | 0.6822 | -- | 0      | 0     | 1 | 0.9931  |
| rs11218018   | 11 | 120703415 | G | A | 0.409  | 0.6822 | +  | 0      | 0     | 0 | 1       |
| rs60816279   | 11 | 117617127 | A | G | 0.409  | 0.6822 | +  | 0      | 0     | 0 | 1       |
| rs680671     | 11 | 117331279 | A | T | -0.409 | 0.6822 | -? | 0      | 0     | 0 | 1       |
| rs111997050  | 11 | 118387892 | T | C | -0.409 | 0.6823 | -+ | -176.3 | 1.086 | 1 | 0.2974  |
| rs7112577    | 11 | 117044603 | G | C | -0.409 | 0.6823 | -? | 0      | 0     | 0 | 1       |
| rs4936558    | 11 | 120704307 | C | T | 0.409  | 0.6825 | +  | 0      | 0     | 0 | 1       |
| rs7937921    | 11 | 117741051 | A | G | -0.409 | 0.6825 | -? | 0      | 0     | 0 | 1       |
| rs12721028   | 11 | 116705590 | G | A | 0.409  | 0.6827 | +  | 0      | 0     | 0 | 1       |
| rs34809912   | 11 | 119640427 | A | G | -0.409 | 0.6827 | -? | 0      | 0     | 0 | 1       |
| rs512588     | 11 | 116246867 | T | G | -0.409 | 0.6827 | -? | 0      | 0     | 0 | 1       |
| rs140231532  | 11 | 116697301 | T | C | 0.409  | 0.6828 | +  | 0      | 0     | 0 | 1       |
| rs78577579   | 11 | 117336708 | T | G | -0.408 | 0.683  | -? | 0      | 0     | 0 | 1       |
| rs11501117   | 11 | 117356908 | G | C | -0.408 | 0.6831 | -? | 0      | 0     | 0 | 1       |
| rs948031     | 11 | 120609495 | G | A | 0.408  | 0.6831 | +  | 0      | 0     | 0 | 1       |
| rs2846125    | 11 | 120604315 | C | T | 0.408  | 0.6833 | +  | 0      | 0     | 0 | 1       |
| rs688035     | 11 | 118802492 | G | C | 0.408  | 0.6833 | -+ | -103.7 | 1.473 | 1 | 0.2249  |
| rs1938948    | 11 | 119421419 | C | T | 0.407  | 0.6837 | +  | 0      | 0     | 0 | 1       |
| rs2845665    | 11 | 119423410 | G | A | 0.407  | 0.6837 | +  | 0      | 0     | 0 | 1       |
| rs2845666    | 11 | 119423269 | G | A | 0.407  | 0.6837 | +  | 0      | 0     | 0 | 1       |

|              |    |           |   |   |        |        |   |        |       |   |         |
|--------------|----|-----------|---|---|--------|--------|---|--------|-------|---|---------|
| rs6589756    | 11 | 119423748 | C | T | 0.407  | 0.6837 | + | 0      | 0     | 0 | 1       |
| rs7395205    | 11 | 119423822 | T | C | 0.407  | 0.6837 | + | 0      | 0     | 0 | 1       |
| rs34420468   | 11 | 119811328 | A | G | -0.407 | 0.6838 | - | 0      | 0     | 0 | 1       |
| rs683743     | 11 | 119962278 | C | G | 0.407  | 0.684  | + | 0      | 0     | 0 | 1       |
| rs2850807    | 11 | 120797893 | T | A | 0.407  | 0.6841 | + | 0      | 0     | 0 | 1       |
| rs118086079  | 11 | 117194059 | A | G | -0.407 | 0.6842 | - | 0      | 0     | 0 | 1       |
| rs17440824   | 11 | 116634173 | T | C | -0.407 | 0.6842 | + | -43.3  | 2.094 | 1 | 0.1479  |
| rs11216664   | 11 | 117849065 | C | G | 0.407  | 0.6843 | + | 0      | 0     | 0 | 1       |
| rs118088243  | 11 | 121165007 | G | A | 0.406  | 0.6844 | + | 0      | 0     | 0 | 1       |
| rs7109876    | 11 | 116848648 | A | C | 0.406  | 0.6844 | + | 0      | 0     | 0 | 1       |
| rs7934890    | 11 | 118655356 | T | C | -0.406 | 0.6846 | - | 0      | 0.121 | 1 | 0.7275  |
| rs4938269    | 11 | 116272650 | C | G | -0.406 | 0.685  | - | 0      | 0     | 0 | 1       |
| rs12805477   | 11 | 120907961 | G | C | 0.405  | 0.6852 | + | 0      | 0     | 0 | 1       |
| rs35457276   | 11 | 120914296 | T | C | 0.405  | 0.6852 | + | 0      | 0     | 0 | 1       |
| rs2282496    | 11 | 117864979 | T | C | 0.405  | 0.6853 | + | 0      | 0     | 0 | 1       |
| rs11216109   | 11 | 116580815 | G | C | -0.405 | 0.6854 | - | 0      | 0     | 0 | 1       |
| rs61902398   | 11 | 121190062 | A | G | -0.405 | 0.6854 | - | 0      | 0     | 0 | 1       |
| rs642936     | 11 | 118019906 | C | T | -0.405 | 0.6854 | + | 0      | 0.685 | 1 | 0.4077  |
| rs9332858    | 11 | 118390082 | C | A | -0.405 | 0.6854 | - | -139.6 | 1.252 | 1 | 0.2631  |
| rs1848688    | 11 | 119432440 | T | C | 0.405  | 0.6855 | + | 0      | 0     | 0 | 1       |
| rs2155196    | 11 | 117736735 | T | C | 0.405  | 0.6855 | + | 0      | 0     | 0 | 1       |
| rs2202884    | 11 | 119433740 | T | C | 0.405  | 0.6855 | + | 0      | 0     | 0 | 1       |
| rs2663627    | 11 | 119433485 | G | C | 0.405  | 0.6855 | + | 0      | 0     | 0 | 1       |
| rs71478237   | 11 | 116228118 | C | A | 0.405  | 0.6855 | + | -104.2 | 1.47  | 1 | 0.2254  |
| rs10892569   | 11 | 120270249 | G | A | 0.405  | 0.6856 | + | 0      | 0     | 0 | 1       |
| rs17121771   | 11 | 118000796 | T | C | 0.405  | 0.6856 | + | 0      | 0     | 0 | 1       |
| rs74601470   | 11 | 116873382 | T | C | -0.405 | 0.6857 | - | 0      | 0     | 0 | 1       |
| rs1787701    | 11 | 116563992 | C | G | 0.405  | 0.6858 | + | 0      | 0     | 0 | 1       |
| rs79536557   | 11 | 116963969 | G | A | -0.404 | 0.6862 | + | 53.1   | 6.397 | 1 | 0.01143 |
| rs17124208   | 11 | 120557814 | C | A | 0.404  | 0.6863 | + | 0      | 0     | 0 | 1       |
| rs60972755   | 11 | 116635613 | A | C | -0.404 | 0.6863 | + | -70.7  | 1.757 | 1 | 0.185   |
| rs1892937    | 11 | 117736770 | C | T | 0.404  | 0.6864 | + | 0      | 0     | 0 | 1       |
| rs9332846    | 11 | 118377523 | A | G | -0.404 | 0.6864 | - | -121.3 | 1.355 | 1 | 0.2443  |
| rs73019249   | 11 | 116252227 | G | A | -0.403 | 0.6866 | - | 0      | 0     | 0 | 1       |
| rs10892549   | 11 | 120075574 | T | C | -0.403 | 0.6867 | - | 0      | 0     | 0 | 1       |
| rs3020104    | 11 | 120685242 | A | G | 0.403  | 0.6867 | + | 0      | 0     | 0 | 1       |
| rs11605475   | 11 | 117324521 | A | G | -0.403 | 0.6868 | - | 0      | 0     | 0 | 1       |
| rs2509004    | 11 | 117410423 | A | G | 0.403  | 0.6868 | + | 0      | 0     | 0 | 1       |
| rs486020     | 11 | 116483126 | C | G | 0.403  | 0.687  | + | 0      | 0     | 0 | 1       |
| rs547021     | 11 | 116329139 | C | T | 0.403  | 0.687  | + | 0      | 0     | 0 | 1       |
| rs552040     | 11 | 119712224 | T | G | -0.403 | 0.687  | - | 0      | 0     | 0 | 1       |
| rs1003261346 | 11 | 117359244 | A | G | -0.403 | 0.6871 | - | 0      | 0     | 0 | 1       |
| rs10466534   | 11 | 117611292 | A | G | 0.403  | 0.6871 | + | 0      | 0     | 0 | 1       |
| rs498689     | 11 | 117463000 | G | A | -0.403 | 0.6871 | - | 0      | 0     | 0 | 1       |
| rs617320     | 11 | 119961694 | G | T | 0.403  | 0.6872 | + | 0      | 0     | 0 | 1       |
| rs1942931    | 11 | 117610854 | A | G | 0.403  | 0.6873 | + | 0      | 0     | 0 | 1       |
| rs4528371    | 11 | 117669418 | T | A | 0.402  | 0.6874 | + | 0      | 0.111 | 1 | 0.7391  |
| rs72999499   | 11 | 118543589 | G | C | -0.402 | 0.6877 | - | 0      | 0     | 0 | 1       |
| rs180330     | 11 | 116622761 | A | G | -0.402 | 0.6878 | - | 0      | 0.198 | 1 | 0.6561  |
| rs3016611    | 11 | 116847584 | A | G | -0.402 | 0.6878 | + | 47.2   | 5.677 | 1 | 0.01719 |
| rs12225230   | 11 | 116728630 | C | G | -0.402 | 0.6879 | - | 0      | 0     | 0 | 1       |
| rs1893968    | 11 | 117335423 | A | G | 0.402  | 0.6879 | + | 0      | 0     | 0 | 1       |
| rs545559     | 11 | 116481248 | A | C | 0.402  | 0.688  | + | 0      | 0     | 0 | 1       |
| rs566254     | 11 | 116481505 | A | T | 0.402  | 0.688  | + | 0      | 0     | 0 | 1       |
| rs11216821   | 11 | 118088362 | C | T | -0.401 | 0.6881 | - | 0      | 0.099 | 1 | 0.7534  |
| rs7929505    | 11 | 119647159 | C | T | -0.401 | 0.6881 | - | 0      | 0     | 0 | 1       |

|             |    |           |   |   |        |        |    |      |       |   |          |
|-------------|----|-----------|---|---|--------|--------|----|------|-------|---|----------|
| rs2072560   | 11 | 116661826 | T | C | -0.401 | 0.6884 | +- | -77  | 1.695 | 1 | 0.1929   |
| rs76916861  | 11 | 116921802 | T | C | -0.401 | 0.6884 | +- | 68.9 | 9.642 | 1 | 0.001901 |
| rs7950360   | 11 | 120461856 | C | G | -0.401 | 0.6885 | -? | 0    | 0     | 0 | 1        |
| rs591671    | 11 | 120878492 | A | G | -0.401 | 0.6886 | +- | 0    | 0.361 | 1 | 0.548    |
| rs117713193 | 11 | 117263874 | T | C | 0.401  | 0.6887 | +- | 0    | 0     | 0 | 1        |
| rs1893967   | 11 | 117335148 | A | G | 0.401  | 0.6887 | +- | 0    | 0     | 0 | 1        |
| rs34505832  | 11 | 120947207 | G | A | 0.4    | 0.6888 | +- | 0    | 0     | 0 | 1        |
| rs117843763 | 11 | 116420968 | A | C | 0.4    | 0.6889 | +- | 0    | 0     | 0 | 1        |
| rs573455    | 11 | 117267884 | A | G | 0.4    | 0.6889 | +- | 0    | 0     | 0 | 1        |
| rs57643109  | 11 | 116638751 | A | G | -0.4   | 0.6889 | -- | 0    | 0.071 | 1 | 0.7899   |
| rs139872819 | 11 | 116631912 | C | T | -0.4   | 0.689  | -- | 0    | 0.071 | 1 | 0.7899   |
| rs17311407  | 11 | 120593695 | T | C | -0.4   | 0.689  | +- | 0    | 0.955 | 1 | 0.3284   |
| rs2846119   | 11 | 120605867 | C | G | 0.4    | 0.689  | +- | 0    | 0     | 0 | 1        |
| rs497653    | 11 | 116828484 | C | T | -0.4   | 0.6891 | +- | 47.2 | 5.681 | 1 | 0.01715  |
| rs4938280   | 11 | 116419442 | C | T | 0.4    | 0.6893 | ++ | 0    | 0.365 | 1 | 0.546    |
| rs80040504  | 11 | 120337712 | A | G | 0.399  | 0.6896 | +- | 0    | 0     | 0 | 1        |
| rs117579298 | 11 | 116642100 | G | A | -0.399 | 0.6897 | -- | 0    | 0.071 | 1 | 0.7895   |
| rs12226536  | 11 | 120706759 | G | C | 0.399  | 0.6897 | +- | 0    | 0     | 0 | 1        |
| rs2155197   | 11 | 117736790 | G | A | 0.399  | 0.6897 | +- | 0    | 0     | 0 | 1        |
| rs17120265  | 11 | 116932615 | G | C | -0.399 | 0.69   | +- | 53.2 | 6.412 | 1 | 0.01134  |
| rs17120271  | 11 | 116935363 | G | C | -0.399 | 0.69   | +- | 53.2 | 6.412 | 1 | 0.01134  |
| rs17120275  | 11 | 116939071 | C | T | -0.399 | 0.69   | +- | 53.2 | 6.412 | 1 | 0.01134  |
| rs73576612  | 11 | 116929666 | C | T | -0.399 | 0.69   | +- | 53.2 | 6.412 | 1 | 0.01134  |
| rs117287247 | 11 | 116470947 | T | C | -0.399 | 0.6902 | -? | 0    | 0     | 0 | 1        |
| rs7948446   | 11 | 117454506 | T | C | 0.399  | 0.6902 | +- | 0    | 0     | 0 | 1        |
| rs59810418  | 11 | 117617219 | C | G | 0.398  | 0.6903 | +- | 0    | 0     | 0 | 1        |
| rs2276434   | 11 | 117959216 | T | C | 0.398  | 0.6904 | +- | 0    | 0.15  | 1 | 0.6985   |
| rs73023350  | 11 | 118449396 | A | G | 0.398  | 0.6904 | +- | 0    | 0.233 | 1 | 0.6296   |
| rs2276435   | 11 | 117959372 | A | G | 0.398  | 0.6905 | +- | 0    | 0.15  | 1 | 0.6984   |
| rs4938803   | 11 | 120268022 | G | A | 0.398  | 0.6906 | +- | 0    | 0     | 0 | 1        |
| rs11215951  | 11 | 116344594 | T | C | 0.398  | 0.6907 | +- | 0    | 0     | 0 | 1        |
| rs7109584   | 11 | 120654400 | A | G | -0.398 | 0.6907 | -? | 0    | 0     | 0 | 1        |
| rs628418    | 11 | 116718366 | G | C | -0.397 | 0.691  | +- | 17.2 | 3.622 | 1 | 0.05702  |
| rs876797    | 11 | 117737747 | A | C | -0.397 | 0.6911 | -? | 0    | 0     | 0 | 1        |
| rs925261    | 11 | 119416327 | G | T | 0.397  | 0.6911 | +- | 0    | 0     | 0 | 1        |
| rs12223757  | 11 | 120706839 | G | A | 0.397  | 0.6912 | +- | 0    | 0     | 0 | 1        |
| rs145949765 | 11 | 116920199 | T | C | -0.397 | 0.6914 | +- | 69   | 9.687 | 1 | 0.001856 |
| rs77775914  | 11 | 116241604 | T | C | -0.397 | 0.6915 | -- | 0    | 0.413 | 1 | 0.5203   |
| rs7122193   | 11 | 120556697 | C | T | -0.396 | 0.6918 | -? | 0    | 0     | 0 | 1        |
| rs10891966  | 11 | 116213941 | G | A | -0.396 | 0.6921 | -- | 0    | 0.441 | 1 | 0.5065   |
| rs632541    | 11 | 119960565 | G | A | 0.396  | 0.6921 | +- | 0    | 0     | 0 | 1        |
| rs1818393   | 11 | 119415314 | A | G | 0.396  | 0.6922 | +- | 0    | 0     | 0 | 1        |
| rs73010424  | 11 | 117124050 | A | G | -0.396 | 0.6922 | -? | 0    | 0     | 0 | 1        |
| rs1320720   | 11 | 120462743 | A | G | -0.396 | 0.6924 | -? | 0    | 0     | 0 | 1        |
| rs61903804  | 11 | 117720645 | G | A | -0.396 | 0.6924 | -? | 0    | 0     | 0 | 1        |
| rs76868258  | 11 | 116993292 | T | C | -0.395 | 0.6925 | -? | 0    | 0     | 0 | 1        |
| rs11217014  | 11 | 118626286 | C | T | -0.395 | 0.6926 | +- | 0    | 0.199 | 1 | 0.6559   |
| rs138990232 | 11 | 120631792 | G | A | 0.395  | 0.6926 | +- | 0    | 0     | 0 | 1        |
| rs1784121   | 11 | 116561790 | T | G | 0.395  | 0.6926 | +- | 0    | 0     | 0 | 1        |
| rs1787704   | 11 | 116561996 | T | C | 0.395  | 0.6926 | +- | 0    | 0     | 0 | 1        |
| rs117096905 | 11 | 116467349 | T | C | -0.395 | 0.6929 | -? | 0    | 0     | 0 | 1        |
| rs35594498  | 11 | 120397162 | T | C | 0.395  | 0.693  | +- | 0    | 0     | 0 | 1        |
| rs116859176 | 11 | 116292818 | C | T | 0.394  | 0.6933 | +- | 0    | 0     | 0 | 1        |
| rs17092631  | 11 | 116476765 | C | T | 0.394  | 0.6937 | +- | 0    | 0     | 0 | 1        |
| rs11215972  | 11 | 116383138 | G | C | -0.394 | 0.6939 | -? | 0    | 0     | 0 | 1        |
| rs2070666   | 11 | 116701674 | A | T | 0.393  | 0.694  | +- | 0    | 0     | 0 | 1        |

|             |    |           |   |   |        |        |    |        |       |   |         |
|-------------|----|-----------|---|---|--------|--------|----|--------|-------|---|---------|
| rs11216404  | 11 | 117334885 | A | C | 0.393  | 0.6941 | +  | 0      | 0     | 0 | 1       |
| rs4938388   | 11 | 117334831 | C | T | 0.393  | 0.6941 | +  | 0      | 0     | 0 | 1       |
| rs45460493  | 11 | 118455465 | A | G | -0.393 | 0.6943 | -- | 0      | 0.003 | 1 | 0.9528  |
| rs2004676   | 11 | 120699625 | T | C | 0.393  | 0.6944 | +  | 0      | 0     | 0 | 1       |
| rs496248    | 11 | 120323214 | A | G | 0.393  | 0.6944 | +  | 0      | 0     | 0 | 1       |
| rs617124    | 11 | 119880367 | A | G | -0.393 | 0.6945 | -  | 0      | 0     | 0 | 1       |
| rs7112199   | 11 | 120758691 | A | G | -0.393 | 0.6945 | -  | 0      | 0     | 0 | 1       |
| rs12273529  | 11 | 119959214 | T | C | -0.393 | 0.6946 | -  | 0      | 0     | 0 | 1       |
| rs12285338  | 11 | 119959144 | G | A | -0.393 | 0.6946 | -  | 0      | 0     | 0 | 1       |
| rs7949126   | 11 | 119959362 | T | C | -0.393 | 0.6946 | -  | 0      | 0     | 0 | 1       |
| rs12276368  | 11 | 120635399 | A | G | -0.392 | 0.6947 | -  | 0      | 0     | 0 | 1       |
| rs538741    | 11 | 120980753 | T | C | -0.392 | 0.6948 | -  | 0      | 0     | 0 | 1       |
| rs77832134  | 11 | 116879636 | G | A | -0.392 | 0.6949 | -  | 0      | 0     | 0 | 1       |
| rs10502243  | 11 | 120795441 | A | G | 0.392  | 0.695  | +  | 0      | 0     | 0 | 1       |
| rs17519093  | 11 | 116629905 | A | G | -0.392 | 0.6951 | -- | 0      | 0.074 | 1 | 0.7863  |
| rs116877083 | 11 | 116634297 | C | A | -0.392 | 0.6953 | -- | 0      | 0.074 | 1 | 0.7861  |
| rs10488698  | 11 | 116633947 | A | G | -0.392 | 0.6954 | -- | 0      | 0.074 | 1 | 0.7861  |
| rs11216923  | 11 | 118465501 | G | A | 0.391  | 0.6955 | +  | 0      | 0.191 | 1 | 0.6622  |
| rs12361458  | 11 | 117317664 | T | C | 0.391  | 0.6955 | +  | 0      | 0     | 0 | 1       |
| rs150734126 | 11 | 116880018 | C | T | -0.391 | 0.6957 | +  | 47.4   | 5.706 | 1 | 0.01691 |
| rs2155260   | 11 | 120666825 | A | G | 0.391  | 0.6957 | +  | 0      | 0     | 0 | 1       |
| rs10750149  | 11 | 119417051 | T | A | 0.391  | 0.6958 | +  | 0      | 0     | 0 | 1       |
| rs11217782  | 11 | 120150936 | C | T | -0.391 | 0.6958 | -  | 0      | 0     | 0 | 1       |
| rs1605854   | 11 | 119418145 | A | G | 0.391  | 0.6958 | +  | 0      | 0     | 0 | 1       |
| rs1828280   | 11 | 119419198 | T | C | 0.391  | 0.6958 | +  | 0      | 0     | 0 | 1       |
| rs2663640   | 11 | 119418640 | C | T | 0.391  | 0.6958 | +  | 0      | 0     | 0 | 1       |
| rs608891    | 11 | 120832264 | A | G | -0.391 | 0.6958 | +  | 0      | 0.354 | 1 | 0.5518  |
| rs9332835   | 11 | 118372923 | A | G | -0.391 | 0.6958 | +  | -124.2 | 1.338 | 1 | 0.2473  |
| rs4936557   | 11 | 120704063 | C | T | 0.391  | 0.6959 | +  | 0      | 0     | 0 | 1       |
| rs4938691   | 11 | 119477261 | C | T | 0.39   | 0.6962 | +  | 0      | 0     | 0 | 1       |
| rs590270    | 11 | 119963787 | C | T | 0.39   | 0.6962 | +  | 0      | 0     | 0 | 1       |
| rs664579    | 11 | 119964344 | G | A | 0.39   | 0.6962 | +  | 0      | 0     | 0 | 1       |
| rs11217971  | 11 | 120551969 | A | G | -0.39  | 0.6963 | -  | 0      | 0     | 0 | 1       |
| rs11607679  | 11 | 119604844 | A | C | 0.39   | 0.6963 | +  | 0      | 0     | 0 | 1       |
| rs7126175   | 11 | 118450875 | T | C | 0.39   | 0.6964 | +  | 0      | 0.247 | 1 | 0.6195  |
| rs77325329  | 11 | 120524275 | A | G | -0.39  | 0.6964 | -  | 0      | 0     | 0 | 1       |
| rs35865949  | 11 | 118229061 | A | T | -0.39  | 0.6965 | -- | 0      | 0     | 1 | 0.983   |
| rs4435039   | 11 | 118297391 | G | A | 0.39   | 0.6966 | +  | 0      | 0.476 | 1 | 0.4904  |
| rs11217471  | 11 | 119630641 | A | G | 0.39   | 0.6967 | +  | 0      | 0     | 0 | 1       |
| rs58868870  | 11 | 118668296 | T | C | -0.39  | 0.6967 | -- | 0      | 0.039 | 1 | 0.844   |
| rs2511064   | 11 | 120611896 | A | G | 0.39   | 0.6968 | +  | 0      | 0     | 0 | 1       |
| rs570637    | 11 | 119702527 | T | C | -0.389 | 0.6971 | -  | 0      | 0     | 0 | 1       |
| rs3016351   | 11 | 116474753 | A | G | -0.389 | 0.6973 | -  | 0      | 0     | 0 | 1       |
| rs7107305   | 11 | 118368665 | G | A | -0.389 | 0.6973 | +  | -140.1 | 1.249 | 1 | 0.2637  |
| rs7123835   | 11 | 118368822 | G | T | -0.389 | 0.6973 | +  | -140.1 | 1.249 | 1 | 0.2637  |
| rs9735449   | 11 | 118448087 | T | C | 0.389  | 0.6976 | +  | 0      | 0.165 | 1 | 0.6849  |
| rs61903395  | 11 | 116931907 | G | A | 0.388  | 0.6979 | +  | 0      | 0     | 0 | 1       |
| rs12788928  | 11 | 119514810 | A | G | -0.388 | 0.698  | -  | 0      | 0     | 0 | 1       |
| rs2017098   | 11 | 117442388 | G | C | 0.388  | 0.698  | +  | 0      | 0     | 0 | 1       |
| rs4280006   | 11 | 121058189 | C | T | -0.388 | 0.698  | -  | 0      | 0     | 0 | 1       |
| rs10892158  | 11 | 117550767 | C | T | 0.388  | 0.6981 | +  | 0      | 0     | 0 | 1       |
| rs1320648   | 11 | 120608912 | C | T | 0.388  | 0.6981 | +  | 0      | 0     | 0 | 1       |
| rs1893262   | 11 | 120169818 | C | T | -0.388 | 0.6981 | -  | 0      | 0     | 0 | 1       |
| rs752979    | 11 | 120608964 | A | G | 0.388  | 0.6981 | +  | 0      | 0     | 0 | 1       |
| rs948032    | 11 | 120608661 | A | G | 0.388  | 0.6981 | +  | 0      | 0     | 0 | 1       |
| rs948033    | 11 | 120608222 | G | A | 0.388  | 0.6981 | +  | 0      | 0     | 0 | 1       |

|             |    |           |   |   |        |        |   |        |       |   |          |
|-------------|----|-----------|---|---|--------|--------|---|--------|-------|---|----------|
| rs949298    | 11 | 120608085 | A | G | 0.388  | 0.6981 | + | 0      | 0     | 0 | 1        |
| rs949299    | 11 | 120608142 | A | T | 0.388  | 0.6981 | + | 0      | 0     | 0 | 1        |
| rs56314469  | 11 | 116794903 | A | G | 0.388  | 0.6983 | + | 0      | 0     | 0 | 1        |
| rs4245203   | 11 | 119579260 | C | T | 0.387  | 0.6984 | + | 0      | 0     | 0 | 1        |
| rs11216922  | 11 | 118465295 | G | A | 0.387  | 0.6986 | + | 0      | 0.197 | 1 | 0.657    |
| rs3825057   | 11 | 118622985 | C | T | -0.387 | 0.6987 | + | 0      | 0.181 | 1 | 0.6701   |
| rs72998668  | 11 | 119904317 | T | C | 0.387  | 0.6987 | + | 0      | 0     | 0 | 1        |
| rs10892178  | 11 | 117685343 | T | C | 0.387  | 0.6988 | + | 0      | 0     | 0 | 1        |
| rs12416901  | 11 | 119587095 | C | T | 0.387  | 0.6989 | + | 0      | 0     | 0 | 1        |
| rs543413    | 11 | 118550017 | C | T | 0.387  | 0.6989 | + | -181.5 | 1.066 | 1 | 0.302    |
| rs665008    | 11 | 119964429 | A | G | 0.387  | 0.6989 | + | 0      | 0     | 0 | 1        |
| rs118168570 | 11 | 116322222 | A | G | 0.387  | 0.699  | + | 0      | 0     | 0 | 1        |
| rs619744    | 11 | 117915659 | G | C | -0.387 | 0.699  | - | 0      | 0     | 0 | 1        |
| rs11216910  | 11 | 118450046 | G | A | 0.386  | 0.6992 | + | 0      | 0.225 | 1 | 0.6352   |
| rs3782046   | 11 | 118230739 | A | G | -0.386 | 0.6992 | - | 0      | 0.001 | 1 | 0.9781   |
| rs59647391  | 11 | 116900956 | G | A | -0.386 | 0.6992 | + | 53.5   | 6.448 | 1 | 0.01111  |
| rs73594141  | 11 | 116882563 | T | C | -0.386 | 0.6992 | + | 53.5   | 6.448 | 1 | 0.01111  |
| rs73594158  | 11 | 116896441 | T | C | -0.386 | 0.6992 | + | 53.5   | 6.448 | 1 | 0.01111  |
| rs73594162  | 11 | 116896811 | T | C | -0.386 | 0.6992 | + | 53.5   | 6.448 | 1 | 0.01111  |
| rs73594164  | 11 | 116897613 | G | T | -0.386 | 0.6992 | + | 53.5   | 6.448 | 1 | 0.01111  |
| rs73594172  | 11 | 116902631 | T | A | -0.386 | 0.6992 | + | 53.5   | 6.448 | 1 | 0.01111  |
| rs11215948  | 11 | 116339688 | G | C | -0.386 | 0.6994 | - | 0      | 0     | 0 | 1        |
| rs543327    | 11 | 118549985 | T | G | 0.386  | 0.6995 | + | -182.4 | 1.062 | 1 | 0.3027   |
| rs7924498   | 11 | 117960661 | A | G | 0.386  | 0.6995 | + | 0      | 0.015 | 1 | 0.9039   |
| rs11999     | 11 | 117690918 | C | A | 0.386  | 0.6996 | + | 0      | 0     | 0 | 1        |
| rs2887245   | 11 | 119460505 | T | C | 0.386  | 0.6996 | + | 0      | 0     | 0 | 1        |
| rs647099    | 11 | 118067009 | A | G | 0.386  | 0.6996 | + | 0      | 0     | 0 | 1        |
| rs11216912  | 11 | 118452334 | C | G | 0.385  | 0.7    | + | 0      | 0.255 | 1 | 0.6135   |
| rs11216913  | 11 | 118453681 | G | A | 0.385  | 0.7    | + | 0      | 0.255 | 1 | 0.6135   |
| rs550164    | 11 | 120002727 | G | A | 0.385  | 0.7    | + | 0      | 0     | 0 | 1        |
| rs12721041  | 11 | 116693871 | T | C | 0.385  | 0.7002 | + | 0      | 0     | 0 | 1        |
| rs598746    | 11 | 118020057 | A | G | -0.385 | 0.7002 | + | 0      | 0.518 | 1 | 0.4717   |
| rs12365322  | 11 | 116490970 | G | T | -0.385 | 0.7003 | - | 0      | 0     | 0 | 1        |
| rs1317723   | 11 | 119985050 | A | G | 0.385  | 0.7004 | + | 0      | 0     | 0 | 1        |
| rs55756957  | 11 | 118747576 | G | A | 0.385  | 0.7004 | + | 40.6   | 5.048 | 1 | 0.02466  |
| rs147864821 | 11 | 117411687 | A | G | 0.385  | 0.7005 | + | 0      | 0     | 0 | 1        |
| rs4938716   | 11 | 119576555 | T | G | -0.385 | 0.7005 | - | 0      | 0     | 0 | 1        |
| rs519116    | 11 | 120991298 | T | C | -0.385 | 0.7006 | - | 0      | 0     | 0 | 1        |
| rs4936536   | 11 | 120521485 | A | G | -0.384 | 0.7007 | - | 0      | 0     | 0 | 1        |
| rs12283211  | 11 | 120890823 | A | G | -0.384 | 0.7009 | - | 0      | 0     | 0 | 1        |
| rs11216911  | 11 | 118451901 | C | T | 0.384  | 0.7011 | + | 0      | 0.243 | 1 | 0.6221   |
| rs79007113  | 11 | 120039835 | A | G | 0.384  | 0.7011 | + | 0      | 0     | 0 | 1        |
| rs10892190  | 11 | 117760079 | G | A | -0.384 | 0.7012 | - | 0      | 0     | 0 | 1        |
| rs10892191  | 11 | 117760118 | C | G | -0.384 | 0.7012 | - | 0      | 0     | 0 | 1        |
| rs118121169 | 11 | 116917089 | A | G | -0.384 | 0.7012 | + | 69.5   | 9.832 | 1 | 0.001715 |
| rs507080    | 11 | 118549582 | A | G | 0.384  | 0.7013 | + | -184.7 | 1.054 | 1 | 0.3046   |
| rs656575    | 11 | 118549908 | G | T | 0.384  | 0.7013 | + | -184.7 | 1.054 | 1 | 0.3046   |
| rs659969    | 11 | 118549803 | T | C | 0.384  | 0.7013 | + | -184.7 | 1.054 | 1 | 0.3046   |
| rs73580405  | 11 | 120529116 | G | A | -0.384 | 0.7013 | - | 0      | 0     | 0 | 1        |
| rs148134535 | 11 | 116674897 | G | C | -0.383 | 0.7015 | - | 0      | 0     | 0 | 1        |
| rs2186747   | 11 | 121037529 | G | C | -0.383 | 0.7016 | - | 0      | 0     | 0 | 1        |
| rs573126    | 11 | 116276086 | C | A | -0.383 | 0.7016 | - | 0      | 0     | 0 | 1        |
| rs6589579   | 11 | 116789635 | C | A | -0.383 | 0.7017 | + | 47.6   | 5.728 | 1 | 0.01669  |
| rs17569099  | 11 | 116350128 | A | T | -0.383 | 0.7019 | - | 0      | 0     | 0 | 1        |
| rs75542782  | 11 | 116637002 | A | G | -0.383 | 0.702  | - | 0      | 0.076 | 1 | 0.7822   |
| rs80120780  | 11 | 117672330 | G | C | 0.383  | 0.7021 | + | 0      | 0.001 | 1 | 0.9739   |

|             |    |           |   |   |        |        |    |        |        |   |          |
|-------------|----|-----------|---|---|--------|--------|----|--------|--------|---|----------|
| rs11217016  | 11 | 118627149 | C | A | -0.382 | 0.7022 | -+ | 0      | 0.22   | 1 | 0.639    |
| rs146877554 | 11 | 117971968 | A | G | 0.382  | 0.7022 | +? | 0      | 0      | 0 | 1        |
| rs2508806   | 11 | 120611914 | C | T | 0.382  | 0.7023 | +? | 0      | 0      | 0 | 1        |
| rs113195776 | 11 | 117853331 | A | G | 0.382  | 0.7024 | +? | 0      | 0      | 0 | 1        |
| rs144018061 | 11 | 120429035 | A | G | -0.382 | 0.7025 | -? | 0      | 0      | 0 | 1        |
| rs73003764  | 11 | 120711290 | G | A | 0.382  | 0.7025 | +? | 0      | 0      | 0 | 1        |
| rs2846121   | 11 | 120605524 | A | G | 0.382  | 0.7027 | +? | 0      | 0      | 0 | 1        |
| rs7130875   | 11 | 118613674 | C | T | -0.382 | 0.7028 | -+ | 0      | 0.18   | 1 | 0.6712   |
| rs948099    | 11 | 117660578 | A | C | 0.382  | 0.7028 | ++ | 0      | 0.003  | 1 | 0.957    |
| rs11216007  | 11 | 116432240 | C | T | 0.381  | 0.7029 | ++ | 0      | 0.005  | 1 | 0.9442   |
| rs11603831  | 11 | 120483858 | T | C | 0.381  | 0.7029 | +? | 0      | 0      | 0 | 1        |
| rs648682    | 11 | 118066582 | T | C | 0.381  | 0.7029 | +? | 0      | 0      | 0 | 1        |
| rs1628536   | 11 | 119963324 | G | A | 0.381  | 0.703  | +? | 0      | 0      | 0 | 1        |
| rs584653    | 11 | 119963001 | T | C | 0.381  | 0.703  | +? | 0      | 0      | 0 | 1        |
| rs605230    | 11 | 119962750 | C | T | 0.381  | 0.703  | +? | 0      | 0      | 0 | 1        |
| rs560919    | 11 | 120995842 | C | T | -0.381 | 0.7031 | -? | 0      | 0      | 0 | 1        |
| rs11216594  | 11 | 117736022 | A | G | 0.381  | 0.7032 | +? | 0      | 0      | 0 | 1        |
| rs2231439   | 11 | 118174885 | G | A | 0.381  | 0.7032 | +? | 0      | 0      | 0 | 1        |
| rs11217018  | 11 | 118635364 | C | T | -0.381 | 0.7033 | -+ | 0      | 0.199  | 1 | 0.6558   |
| rs11823543  | 11 | 116649135 | A | G | -0.38  | 0.7037 | +- | -62.1  | 1.851  | 1 | 0.1737   |
| rs681160    | 11 | 117304947 | C | T | 0.38   | 0.7038 | +? | 0      | 0      | 0 | 1        |
| rs73026322  | 11 | 117818505 | T | C | -0.38  | 0.7039 | -- | 0      | 0.037  | 1 | 0.847    |
| rs7925270   | 11 | 120563298 | T | C | -0.38  | 0.7039 | -? | 0      | 0      | 0 | 1        |
| rs17842763  | 11 | 118454177 | G | A | 0.38   | 0.7041 | +- | 0      | 0.252  | 1 | 0.6157   |
| rs7111646   | 11 | 120758479 | T | A | -0.38  | 0.7042 | -? | 0      | 0      | 0 | 1        |
| rs4457789   | 11 | 118539170 | T | G | 0.379  | 0.7044 | -+ | 0      | 0.862  | 1 | 0.3533   |
| rs537907    | 11 | 120078501 | C | G | 0.379  | 0.7045 | +? | 0      | 0      | 0 | 1        |
| rs540857    | 11 | 120078890 | G | A | 0.379  | 0.7045 | +? | 0      | 0      | 0 | 1        |
| rs2271249   | 11 | 119479391 | C | T | 0.379  | 0.7046 | +? | 0      | 0      | 0 | 1        |
| rs7116876   | 11 | 118371025 | C | G | -0.379 | 0.705  | -+ | -128.4 | 1.314  | 1 | 0.2517   |
| rs2155263   | 11 | 120606683 | A | G | 0.378  | 0.7053 | +? | 0      | 0      | 0 | 1        |
| rs117554512 | 11 | 120098329 | T | C | 0.378  | 0.7055 | +? | 0      | 0      | 0 | 1        |
| rs10892004  | 11 | 116514417 | T | C | -0.378 | 0.7056 | -? | 0      | 0      | 0 | 1        |
| rs595964    | 11 | 118026788 | A | G | -0.378 | 0.7058 | -- | 0      | 0      | 1 | 0.9902   |
| rs76690043  | 11 | 116801529 | G | C | 0.378  | 0.7058 | +? | 0      | 0      | 0 | 1        |
| rs7947144   | 11 | 117525255 | G | A | -0.378 | 0.7058 | -? | 0      | 0      | 0 | 1        |
| rs10892282  | 11 | 118627778 | C | G | -0.377 | 0.7061 | -+ | 0      | 0.2    | 1 | 0.6543   |
| rs605908    | 11 | 118067192 | C | A | 0.377  | 0.7062 | +? | 0      | 0      | 0 | 1        |
| rs617715    | 11 | 119961635 | A | T | 0.377  | 0.7062 | +? | 0      | 0      | 0 | 1        |
| rs4938423   | 11 | 117509797 | T | C | -0.377 | 0.7063 | -? | 0      | 0      | 0 | 1        |
| rs10892104  | 11 | 117309495 | A | G | -0.377 | 0.7064 | -? | 0      | 0      | 0 | 1        |
| rs77322791  | 11 | 116911590 | G | A | -0.377 | 0.7064 | -+ | 72     | 10.732 | 1 | 0.001053 |
| rs508023    | 11 | 116273569 | G | T | -0.377 | 0.7065 | -? | 0      | 0      | 0 | 1        |
| rs145133311 | 11 | 116886516 | T | C | -0.376 | 0.7066 | +- | 47.8   | 5.746  | 1 | 0.01652  |
| rs17120251  | 11 | 116923488 | C | T | 0.376  | 0.7066 | +? | 0      | 0      | 0 | 1        |
| rs584329    | 11 | 120994638 | T | C | -0.376 | 0.7066 | -? | 0      | 0      | 0 | 1        |
| rs659956    | 11 | 120994961 | A | G | -0.376 | 0.7066 | -? | 0      | 0      | 0 | 1        |
| rs75048292  | 11 | 116383348 | A | G | -0.376 | 0.7066 | -? | 0      | 0      | 0 | 1        |
| rs2846120   | 11 | 120605759 | T | C | 0.376  | 0.7067 | +? | 0      | 0      | 0 | 1        |
| rs2852230   | 11 | 120605736 | C | G | 0.376  | 0.7067 | +? | 0      | 0      | 0 | 1        |
| rs2845667   | 11 | 119422645 | T | C | 0.376  | 0.7068 | +? | 0      | 0      | 0 | 1        |
| rs7131676   | 11 | 119631325 | G | A | 0.376  | 0.7069 | +? | 0      | 0      | 0 | 1        |
| rs113950321 | 11 | 119609828 | C | A | 0.376  | 0.7071 | +? | 0      | 0      | 0 | 1        |
| rs77752432  | 11 | 117752769 | T | C | -0.375 | 0.7073 | -? | 0      | 0      | 0 | 1        |
| rs7105537   | 11 | 117808853 | A | G | 0.375  | 0.7074 | -+ | -35.2  | 2.219  | 1 | 0.1363   |
| rs2271250   | 11 | 119479520 | C | T | 0.375  | 0.7075 | +? | 0      | 0      | 0 | 1        |

|             |    |           |   |   |        |        |    |       |       |   |          |
|-------------|----|-----------|---|---|--------|--------|----|-------|-------|---|----------|
| rs12277021  | 11 | 119452530 | C | T | -0.375 | 0.7077 | -? | 0     | 0     | 0 | 1        |
| rs2444239   | 11 | 120056416 | A | T | -0.374 | 0.7081 | -- | 0     | 0.289 | 1 | 0.5911   |
| rs73023341  | 11 | 118445585 | G | A | 0.374  | 0.7082 | +- | 0     | 0.275 | 1 | 0.6      |
| rs1939935   | 11 | 121040910 | C | T | -0.374 | 0.7083 | -? | 0     | 0     | 0 | 1        |
| rs2156637   | 11 | 120770778 | A | G | 0.374  | 0.7083 | +  | 0     | 0     | 0 | 1        |
| rs74890383  | 11 | 116428953 | A | G | 0.374  | 0.7084 | ++ | 0     | 0.093 | 1 | 0.7598   |
| rs78243160  | 11 | 116428591 | T | C | 0.374  | 0.7084 | ++ | 0     | 0.093 | 1 | 0.7598   |
| rs1786179   | 11 | 117914304 | A | T | -0.374 | 0.7085 | -? | 0     | 0     | 0 | 1        |
| rs1786180   | 11 | 117914297 | G | C | -0.374 | 0.7085 | -? | 0     | 0     | 0 | 1        |
| rs2155262   | 11 | 120610692 | A | G | 0.374  | 0.7085 | +  | 0     | 0     | 0 | 1        |
| rs10790399  | 11 | 120552067 | A | C | -0.374 | 0.7086 | -? | 0     | 0     | 0 | 1        |
| rs486394    | 11 | 116526322 | C | A | 0.374  | 0.7086 | +  | 0     | 0     | 0 | 1        |
| rs4936509   | 11 | 120041444 | C | T | -0.374 | 0.7086 | -? | 0     | 0     | 0 | 1        |
| rs17120029  | 11 | 116650118 | T | C | -0.374 | 0.7087 | +- | -61.2 | 1.862 | 1 | 0.1724   |
| rs1783853   | 11 | 117914550 | G | A | -0.374 | 0.7087 | -? | 0     | 0     | 0 | 1        |
| rs7924387   | 11 | 118954265 | A | G | -0.374 | 0.7087 | -? | 0     | 0     | 0 | 1        |
| rs34782343  | 11 | 118153511 | G | T | -0.373 | 0.7088 | +  | 37.8  | 4.82  | 1 | 0.02814  |
| rs3016358   | 11 | 116478660 | A | G | 0.373  | 0.7091 | +  | 0     | 0     | 0 | 1        |
| rs7115634   | 11 | 118466249 | G | A | 0.373  | 0.7091 | +- | 0     | 0.15  | 1 | 0.6984   |
| rs11600715  | 11 | 116401884 | G | A | -0.373 | 0.7092 | -? | 0     | 0     | 0 | 1        |
| rs3753058   | 11 | 118221350 | T | G | -0.373 | 0.7092 | -- | 0     | 0.001 | 1 | 0.9745   |
| rs3753059   | 11 | 118221349 | C | T | -0.373 | 0.7092 | -- | 0     | 0.001 | 1 | 0.9745   |
| rs3753060   | 11 | 118221137 | T | C | -0.373 | 0.7092 | -- | 0     | 0.001 | 1 | 0.9745   |
| rs7103514   | 11 | 117820561 | G | A | -0.373 | 0.7092 | -- | 0     | 0.002 | 1 | 0.9643   |
| rs508025    | 11 | 116273570 | A | T | -0.373 | 0.7093 | -? | 0     | 0     | 0 | 1        |
| rs668400    | 11 | 119901095 | A | C | 0.372  | 0.7098 | +  | 0     | 0     | 0 | 1        |
| rs873713    | 11 | 117739916 | T | A | -0.372 | 0.7099 | -? | 0     | 0     | 0 | 1        |
| rs11216909  | 11 | 118449746 | T | C | 0.372  | 0.71   | +- | 0     | 0.217 | 1 | 0.6411   |
| rs4938482   | 11 | 117973218 | G | T | -0.372 | 0.7101 | -- | 0     | 0     | 1 | 0.9911   |
| rs61901067  | 11 | 119457720 | G | A | 0.371  | 0.7103 | +  | 0     | 0     | 0 | 1        |
| rs567610    | 11 | 116317895 | T | C | -0.371 | 0.7104 | -? | 0     | 0     | 0 | 1        |
| rs661189    | 11 | 120996969 | G | C | -0.371 | 0.7104 | -? | 0     | 0     | 0 | 1        |
| rs12362410  | 11 | 116422860 | A | G | 0.371  | 0.7105 | +  | 0     | 0.463 | 1 | 0.496    |
| rs71484178  | 11 | 120396030 | A | G | 0.371  | 0.7109 | +  | 0     | 0     | 0 | 1        |
| rs80094129  | 11 | 121103437 | A | C | -0.371 | 0.711  | -? | 0     | 0     | 0 | 1        |
| rs76982250  | 11 | 116915242 | T | C | -0.37  | 0.7111 | +  | 69.9  | 9.978 | 1 | 0.001584 |
| rs12365194  | 11 | 120541263 | A | G | -0.37  | 0.7114 | -? | 0     | 0     | 0 | 1        |
| rs34492753  | 11 | 119660492 | T | C | -0.37  | 0.7116 | -? | 0     | 0     | 0 | 1        |
| rs4938479   | 11 | 117956971 | A | G | 0.37   | 0.7116 | +- | 0     | 0.161 | 1 | 0.6886   |
| rs543290    | 11 | 117770998 | C | A | -0.37  | 0.7116 | -? | 0     | 0     | 0 | 1        |
| rs11218190  | 11 | 121053640 | A | G | -0.369 | 0.7118 | -? | 0     | 0     | 0 | 1        |
| rs117683585 | 11 | 117125769 | G | A | -0.369 | 0.7123 | -? | 0     | 0     | 0 | 1        |
| rs12574216  | 11 | 116239385 | G | T | -0.369 | 0.7123 | -- | 0     | 0.392 | 1 | 0.5313   |
| rs75133657  | 11 | 121184472 | C | A | 0.369  | 0.7123 | +  | 0     | 0     | 0 | 1        |
| rs2663623   | 11 | 119427624 | A | G | 0.369  | 0.7124 | +  | 0     | 0     | 0 | 1        |
| rs2845661   | 11 | 119427893 | T | G | 0.369  | 0.7124 | +  | 0     | 0     | 0 | 1        |
| rs11216906  | 11 | 118443944 | A | G | 0.368  | 0.7126 | +- | 0     | 0.272 | 1 | 0.6023   |
| rs117053908 | 11 | 117407275 | T | G | 0.368  | 0.7126 | +  | 0     | 0     | 0 | 1        |
| rs4936407   | 11 | 117638627 | T | C | 0.368  | 0.7126 | +  | 0     | 0     | 0 | 1        |
| rs56286911  | 11 | 116493201 | T | C | -0.368 | 0.7126 | -? | 0     | 0     | 0 | 1        |
| rs2846124   | 11 | 120604347 | C | A | 0.368  | 0.7127 | +  | 0     | 0     | 0 | 1        |
| rs647573    | 11 | 118067132 | C | T | 0.368  | 0.7129 | +  | 0     | 0     | 0 | 1        |
| rs11819822  | 11 | 117335165 | T | C | -0.367 | 0.7134 | -? | 0     | 0     | 0 | 1        |
| rs2276421   | 11 | 118239266 | A | G | -0.367 | 0.7134 | -- | 0     | 0.001 | 1 | 0.9721   |
| rs10892409  | 11 | 119451111 | C | A | -0.367 | 0.7135 | -? | 0     | 0     | 0 | 1        |
| rs723953    | 11 | 116924978 | C | A | 0.367  | 0.7135 | +  | 0     | 0     | 0 | 1        |

|             |    |           |   |   |        |        |   |        |       |   |        |
|-------------|----|-----------|---|---|--------|--------|---|--------|-------|---|--------|
| rs624328    | 11 | 118035087 | G | A | 0.367  | 0.7136 | + | 0      | 0     | 0 | 1      |
| rs7124498   | 11 | 118616253 | A | G | -0.367 | 0.7136 | - | 0      | 0.245 | 1 | 0.6204 |
| rs1605855   | 11 | 119418178 | A | C | 0.367  | 0.7139 | + | 0      | 0     | 0 | 1      |
| rs12420596  | 11 | 116462788 | A | G | -0.366 | 0.714  | - | 0      | 0     | 0 | 1      |
| rs11216421  | 11 | 117355493 | C | G | -0.366 | 0.7141 | - | 0      | 0     | 0 | 1      |
| rs1629201   | 11 | 119967980 | C | T | 0.366  | 0.7141 | + | 0      | 0     | 0 | 1      |
| rs12417015  | 11 | 116550776 | G | A | 0.366  | 0.7142 | + | 0      | 0     | 0 | 1      |
| rs17119495  | 11 | 116224775 | C | T | -0.366 | 0.7143 | - | -130.3 | 1.302 | 1 | 0.2538 |
| rs73022410  | 11 | 117785742 | C | G | -0.366 | 0.7143 | - | 0      | 0     | 0 | 1      |
| rs75204992  | 11 | 117784902 | G | A | -0.366 | 0.7145 | - | 0      | 0     | 0 | 1      |
| rs562993    | 11 | 119746467 | A | T | 0.366  | 0.7146 | + | 0      | 0     | 0 | 1      |
| rs600484    | 11 | 119967026 | A | T | 0.366  | 0.7146 | + | 0      | 0     | 0 | 1      |
| rs610075    | 11 | 119967383 | T | G | 0.366  | 0.7146 | + | 0      | 0     | 0 | 1      |
| rs611656    | 11 | 119967247 | T | C | 0.366  | 0.7146 | + | 0      | 0     | 0 | 1      |
| rs11216031  | 11 | 116466289 | C | A | 0.366  | 0.7147 | + | 0      | 0     | 0 | 1      |
| rs112995279 | 11 | 116365711 | A | C | 0.366  | 0.7147 | + | 0      | 0     | 0 | 1      |
| rs72645462  | 11 | 117293032 | A | T | 0.366  | 0.7147 | + | 0      | 0     | 0 | 1      |
| rs150325557 | 11 | 117853333 | C | G | 0.365  | 0.7152 | + | 0      | 0     | 0 | 1      |
| rs55844025  | 11 | 118446298 | T | C | 0.365  | 0.7152 | - | 0      | 0.138 | 1 | 0.7107 |
| rs112319461 | 11 | 116493155 | A | G | -0.364 | 0.7156 | - | 0      | 0     | 0 | 1      |
| rs648947    | 11 | 118067426 | A | G | 0.364  | 0.7156 | + | 0      | 0     | 0 | 1      |
| rs118135828 | 11 | 119897773 | A | G | 0.364  | 0.7157 | + | 0      | 0     | 0 | 1      |
| rs181124100 | 11 | 116464465 | T | C | 0.364  | 0.7157 | + | 0      | 0     | 0 | 1      |
| rs592765    | 11 | 119897774 | A | C | 0.364  | 0.7157 | + | 0      | 0     | 0 | 1      |
| rs61592631  | 11 | 116533684 | T | C | 0.364  | 0.7157 | + | 0      | 0     | 0 | 1      |
| rs2252771   | 11 | 120414851 | G | C | -0.364 | 0.7158 | - | 0      | 0     | 0 | 1      |
| rs4331108   | 11 | 120490713 | T | C | 0.364  | 0.7158 | + | 0      | 0     | 0 | 1      |
| rs549406    | 11 | 119711982 | C | T | 0.364  | 0.7158 | + | 0      | 0     | 0 | 1      |
| rs113816823 | 11 | 119612600 | G | A | 0.364  | 0.7159 | + | 0      | 0     | 0 | 1      |
| rs607142    | 11 | 120831878 | T | C | -0.364 | 0.716  | - | 0      | 0.336 | 1 | 0.5622 |
| rs7106140   | 11 | 120556557 | T | G | -0.364 | 0.716  | - | 0      | 0     | 0 | 1      |
| rs7106261   | 11 | 120556641 | A | G | -0.364 | 0.716  | - | 0      | 0     | 0 | 1      |
| rs11217857  | 11 | 120270170 | G | A | 0.364  | 0.7161 | + | 0      | 0     | 0 | 1      |
| rs3824943   | 11 | 117695340 | T | C | 0.364  | 0.7162 | + | 0      | 0     | 0 | 1      |
| rs4537768   | 11 | 121192985 | T | G | -0.363 | 0.7165 | - | 0      | 0     | 0 | 1      |
| rs2946742   | 11 | 118017093 | G | A | 0.363  | 0.7166 | + | 0      | 0.044 | 1 | 0.8332 |
| rs4080140   | 11 | 116676590 | A | G | 0.363  | 0.7166 | + | 0      | 0     | 0 | 1      |
| rs56220308  | 11 | 119451380 | C | G | -0.363 | 0.7166 | - | 0      | 0     | 0 | 1      |
| rs668021    | 11 | 120879655 | C | G | 0.363  | 0.7166 | + | 0      | 0     | 0 | 1      |
| rs7939622   | 11 | 118087841 | A | G | -0.363 | 0.7169 | - | 0      | 0.085 | 1 | 0.7704 |
| rs78751065  | 11 | 117171413 | T | C | -0.362 | 0.717  | - | 0      | 0     | 0 | 1      |
| rs10892360  | 11 | 119268984 | A | G | -0.362 | 0.7174 | - | 0      | 0     | 0 | 1      |
| rs4565903   | 11 | 120497375 | G | C | 0.362  | 0.7174 | + | 0      | 0     | 0 | 1      |
| rs117794242 | 11 | 120712972 | T | C | -0.362 | 0.7175 | - | 0      | 0     | 0 | 1      |
| rs609650    | 11 | 119967484 | C | T | 0.362  | 0.7175 | + | 0      | 0     | 0 | 1      |
| rs1629347   | 11 | 119967918 | A | C | 0.362  | 0.7177 | + | 0      | 0     | 0 | 1      |
| rs1670196   | 11 | 119968598 | C | T | 0.362  | 0.7177 | + | 0      | 0     | 0 | 1      |
| rs1670197   | 11 | 119968367 | C | G | 0.362  | 0.7177 | + | 0      | 0     | 0 | 1      |
| rs1670198   | 11 | 119968311 | C | T | 0.362  | 0.7177 | + | 0      | 0     | 0 | 1      |
| rs1787025   | 11 | 119968495 | G | T | 0.362  | 0.7177 | + | 0      | 0     | 0 | 1      |
| rs1787026   | 11 | 119968392 | C | G | 0.362  | 0.7177 | + | 0      | 0     | 0 | 1      |
| rs1790472   | 11 | 119967930 | G | A | 0.362  | 0.7177 | + | 0      | 0     | 0 | 1      |
| rs639775    | 11 | 119968506 | G | C | 0.362  | 0.7177 | + | 0      | 0     | 0 | 1      |
| rs12279393  | 11 | 117554747 | C | T | 0.361  | 0.7179 | + | 0      | 0     | 0 | 1      |
| rs200069252 | 11 | 118354750 | A | T | -0.361 | 0.718  | - | -142.2 | 1.239 | 1 | 0.2657 |
| rs7118350   | 11 | 119706311 | G | C | -0.361 | 0.718  | - | 0      | 0     | 0 | 1      |

|             |    |           |   |   |        |        |     |        |       |   |         |
|-------------|----|-----------|---|---|--------|--------|-----|--------|-------|---|---------|
| rs873059    | 11 | 120097498 | T | C | -0.361 | 0.718  | -?  | 0      | 0     | 0 | 1       |
| rs55728331  | 11 | 117526440 | A | G | 0.361  | 0.7181 | +?  | 0      | 0     | 0 | 1       |
| rs58950690  | 11 | 116543098 | C | T | 0.361  | 0.7183 | +?  | 0      | 0     | 0 | 1       |
| rs11217021  | 11 | 118640828 | C | T | -0.361 | 0.7184 | -+  | 0      | 0.187 | 1 | 0.6652  |
| rs1320656   | 11 | 117739122 | C | A | 0.361  | 0.7184 | +?  | 0      | 0     | 0 | 1       |
| rs7129267   | 11 | 121049690 | G | T | -0.361 | 0.7184 | -?  | 0      | 0     | 0 | 1       |
| rs501763    | 11 | 116260707 | G | A | -0.36  | 0.7185 | -?  | 0      | 0     | 0 | 1       |
| rs951657    | 11 | 118067621 | A | G | 0.36   | 0.7186 | +?  | 0      | 0     | 0 | 1       |
| rs10790226  | 11 | 117806937 | T | C | 0.36   | 0.7187 | -+  | -32.5  | 2.264 | 1 | 0.1324  |
| rs504148    | 11 | 121003514 | T | C | -0.36  | 0.7188 | -?  | 0      | 0     | 0 | 1       |
| rs616120    | 11 | 121003046 | A | G | -0.36  | 0.7188 | -?  | 0      | 0     | 0 | 1       |
| rs74337439  | 11 | 118626825 | A | G | -0.36  | 0.7188 | -+  | -37.7  | 2.178 | 1 | 0.14    |
| rs2276418   | 11 | 118230264 | T | A | -0.36  | 0.7189 | --  | 0      | 0     | 1 | 0.9968  |
| rs7105943   | 11 | 120556610 | A | C | -0.36  | 0.719  | -?  | 0      | 0     | 0 | 1       |
| rs11216921  | 11 | 118464815 | C | G | 0.36   | 0.7191 | +-- | 0      | 0.158 | 1 | 0.691   |
| rs3181259   | 11 | 118214067 | A | G | -0.36  | 0.7191 | --  | 0      | 0.006 | 1 | 0.9378  |
| rs11217013  | 11 | 118624919 | C | G | -0.36  | 0.7192 | -+  | 0      | 0.227 | 1 | 0.6339  |
| rs180367    | 11 | 116594715 | G | A | -0.359 | 0.7193 | -+  | -7.8   | 2.783 | 1 | 0.0953  |
| rs1893900   | 11 | 117436906 | T | C | -0.359 | 0.7193 | -?  | 0      | 0     | 0 | 1       |
| rs58777850  | 11 | 117317593 | C | T | 0.359  | 0.7193 | +?  | 0      | 0     | 0 | 1       |
| rs11216153  | 11 | 116705100 | T | G | 0.359  | 0.7195 | +?  | 0      | 0     | 0 | 1       |
| rs9332816   | 11 | 118364404 | T | G | -0.359 | 0.7195 | -+  | -155.1 | 1.176 | 1 | 0.2782  |
| rs10790217  | 11 | 117732028 | G | A | 0.359  | 0.7196 | +?  | 0      | 0     | 0 | 1       |
| rs117323348 | 11 | 121193894 | G | C | -0.359 | 0.7196 | -?  | 0      | 0     | 0 | 1       |
| rs2155264   | 11 | 120606577 | G | C | 0.359  | 0.7196 | +?  | 0      | 0     | 0 | 1       |
| rs73588424  | 11 | 116646107 | G | A | -0.359 | 0.7197 | +-- | -59.2  | 1.885 | 1 | 0.1698  |
| rs12279777  | 11 | 119451188 | T | A | -0.359 | 0.7198 | -?  | 0      | 0     | 0 | 1       |
| rs10750099  | 11 | 116788699 | A | C | -0.359 | 0.7199 | +-- | 45.7   | 5.526 | 1 | 0.01873 |
| rs12277899  | 11 | 119450113 | T | A | -0.359 | 0.7199 | -?  | 0      | 0     | 0 | 1       |
| rs55801969  | 11 | 119841751 | G | A | -0.358 | 0.7202 | -?  | 0      | 0     | 0 | 1       |
| rs80137897  | 11 | 116954760 | C | T | -0.358 | 0.7202 | +-- | 48.1   | 5.779 | 1 | 0.01622 |
| rs622350    | 11 | 119883569 | A | C | 0.358  | 0.7205 | +?  | 0      | 0     | 0 | 1       |
| rs71482129  | 11 | 118003694 | A | G | 0.358  | 0.7205 | ++  | 0      | 0.004 | 1 | 0.9468  |
| rs3751020   | 11 | 119479052 | C | T | 0.358  | 0.7207 | +?  | 0      | 0     | 0 | 1       |
| rs651055    | 11 | 119848156 | C | G | -0.357 | 0.7208 | -?  | 0      | 0     | 0 | 1       |
| rs654884    | 11 | 119967159 | T | C | 0.357  | 0.7208 | +?  | 0      | 0     | 0 | 1       |
| rs12802920  | 11 | 116412160 | C | A | 0.357  | 0.7209 | ++  | 0      | 0.308 | 1 | 0.5789  |
| rs112508300 | 11 | 118385249 | G | A | 0.357  | 0.7213 | +-- | 0      | 0.048 | 1 | 0.8264  |
| rs61897871  | 11 | 119875928 | G | A | -0.357 | 0.7213 | -?  | 0      | 0     | 0 | 1       |
| rs629345    | 11 | 119006722 | C | T | 0.357  | 0.7213 | +?  | 0      | 0     | 0 | 1       |
| rs637464    | 11 | 119968997 | G | T | 0.357  | 0.7213 | +?  | 0      | 0     | 0 | 1       |
| rs10750116  | 11 | 117743822 | C | G | 0.356  | 0.7216 | +?  | 0      | 0     | 0 | 1       |
| rs58270621  | 11 | 118413604 | A | G | 0.356  | 0.7216 | ++  | 0      | 0.019 | 1 | 0.8902  |
| rs12362262  | 11 | 119951702 | T | C | 0.356  | 0.7218 | +?  | 0      | 0     | 0 | 1       |
| rs10790342  | 11 | 119630418 | A | G | 0.356  | 0.7219 | +?  | 0      | 0     | 0 | 1       |
| rs12295555  | 11 | 119837503 | C | T | -0.356 | 0.7219 | -?  | 0      | 0     | 0 | 1       |
| rs34006113  | 11 | 119838017 | T | G | -0.356 | 0.7219 | -?  | 0      | 0     | 0 | 1       |
| rs56785719  | 11 | 118176623 | G | C | 0.356  | 0.722  | +?  | 0      | 0     | 0 | 1       |
| rs11217505  | 11 | 119658670 | C | G | -0.356 | 0.7221 | -?  | 0      | 0     | 0 | 1       |
| rs7931564   | 11 | 118469571 | G | A | 0.356  | 0.7222 | +-- | 0      | 0.262 | 1 | 0.6088  |
| rs1783935   | 11 | 118539566 | T | A | 0.355  | 0.7223 | -+  | 0      | 0.931 | 1 | 0.3347  |
| rs10502219  | 11 | 116412613 | A | G | 0.355  | 0.7226 | -+  | 0      | 0.395 | 1 | 0.5295  |
| rs7110526   | 11 | 118633533 | C | T | -0.355 | 0.7226 | -+  | 0      | 0.186 | 1 | 0.6666  |
| rs1784298   | 11 | 118548665 | C | T | 0.355  | 0.7228 | -+  | 0      | 0.953 | 1 | 0.3289  |
| rs4938522   | 11 | 118548671 | T | A | 0.355  | 0.7228 | -+  | 0      | 0.953 | 1 | 0.3289  |
| rs4938523   | 11 | 118548838 | T | G | 0.355  | 0.7228 | -+  | 0      | 0.953 | 1 | 0.3289  |

|             |    |           |   |   |        |        |    |        |        |   |          |
|-------------|----|-----------|---|---|--------|--------|----|--------|--------|---|----------|
| rs180366    | 11 | 116595756 | T | C | -0.355 | 0.7229 | +  | -8.2   | 2.773  | 1 | 0.09584  |
| rs10892122  | 11 | 117353773 | A | G | -0.354 | 0.723  | -? | 0      | 0      | 0 | 1        |
| rs11216419  | 11 | 117353286 | A | G | -0.354 | 0.723  | -? | 0      | 0      | 0 | 1        |
| rs12785387  | 11 | 120221987 | T | C | 0.354  | 0.723  | +  | 0      | 0      | 0 | 1        |
| rs17092756  | 11 | 118457630 | C | G | 0.354  | 0.723  | +  | 0      | 0.312  | 1 | 0.5762   |
| rs2715882   | 11 | 120133153 | T | C | -0.354 | 0.7231 | -? | 0      | 0      | 0 | 1        |
| rs11601584  | 11 | 116571284 | C | T | 0.354  | 0.7232 | +  | 0      | 0      | 0 | 1        |
| rs12795615  | 11 | 118214562 | T | C | -0.354 | 0.7232 | -- | 0      | 0      | 1 | 0.9827   |
| rs74835404  | 11 | 117645002 | A | G | -0.354 | 0.7232 | +  | 12.3   | 3.42   | 1 | 0.0644   |
| rs2509623   | 11 | 120109967 | T | C | -0.354 | 0.7233 | -? | 0      | 0      | 0 | 1        |
| rs11217601  | 11 | 119829572 | C | A | 0.354  | 0.7234 | +  | 0      | 0      | 0 | 1        |
| rs1786183   | 11 | 118017445 | A | G | 0.354  | 0.7234 | ++ | 0      | 0.08   | 1 | 0.7778   |
| rs112910608 | 11 | 118637475 | T | C | -0.354 | 0.7237 | +  | 0      | 0.182  | 1 | 0.6697   |
| rs34405565  | 11 | 118233424 | T | C | -0.354 | 0.7237 | -- | 0      | 0      | 1 | 0.9884   |
| rs3741311   | 11 | 117989554 | G | A | -0.354 | 0.7237 | -- | 0      | 0      | 1 | 0.9825   |
| rs573211    | 11 | 120044762 | A | G | -0.354 | 0.7237 | -? | 0      | 0      | 0 | 1        |
| rs11216917  | 11 | 118462160 | G | T | 0.353  | 0.7238 | +  | 0      | 0.253  | 1 | 0.6148   |
| rs11218028  | 11 | 120717000 | T | G | 0.353  | 0.7238 | +  | 0      | 0      | 0 | 1        |
| rs601634    | 11 | 116668511 | T | C | -0.353 | 0.7238 | +  | 2.7    | 3.084  | 1 | 0.07907  |
| rs7928092   | 11 | 117991403 | G | C | -0.353 | 0.7239 | -- | 0      | 0      | 1 | 0.9833   |
| rs117913812 | 11 | 119773797 | C | T | 0.353  | 0.724  | +  | 0      | 0      | 0 | 1        |
| rs73615909  | 11 | 118322488 | T | C | -0.353 | 0.724  | +  | 0      | 0.702  | 1 | 0.4021   |
| rs75819084  | 11 | 117576946 | T | C | 0.353  | 0.7242 | +  | 0      | 0      | 0 | 1        |
| rs10750167  | 11 | 119834547 | G | A | -0.353 | 0.7243 | -? | 0      | 0      | 0 | 1        |
| rs1799991   | 11 | 118957091 | A | G | -0.353 | 0.7243 | -? | 0      | 0      | 0 | 1        |
| rs4505099   | 11 | 117848645 | G | A | -0.353 | 0.7243 | +  | 0      | 0.451  | 1 | 0.5018   |
| rs9332801   | 11 | 118355642 | C | A | -0.353 | 0.7243 | +  | -146.5 | 1.217  | 1 | 0.2699   |
| rs11217164  | 11 | 119008538 | A | G | 0.353  | 0.7244 | +  | 0      | 0      | 0 | 1        |
| rs7938794   | 11 | 117990403 | T | G | -0.352 | 0.7246 | -- | 0      | 0      | 1 | 0.9829   |
| rs948030    | 11 | 120615801 | C | G | 0.352  | 0.7246 | +  | 0      | 0      | 0 | 1        |
| rs948108    | 11 | 117738911 | A | G | 0.352  | 0.7246 | +  | 0      | 0      | 0 | 1        |
| rs17121760  | 11 | 117988797 | A | G | 0.352  | 0.7247 | +  | 0      | 0      | 0 | 1        |
| rs4938713   | 11 | 119568994 | T | C | -0.352 | 0.7247 | -? | 0      | 0      | 0 | 1        |
| rs73596628  | 11 | 117572183 | C | T | -0.352 | 0.7248 | -? | 0      | 0      | 0 | 1        |
| rs79717347  | 11 | 117721360 | G | T | -0.352 | 0.7249 | -? | 0      | 0      | 0 | 1        |
| rs11216521  | 11 | 117614122 | A | G | 0.352  | 0.725  | +  | 0      | 0      | 0 | 1        |
| rs7116903   | 11 | 117807414 | T | C | 0.352  | 0.725  | +  | -42.9  | 2.099  | 1 | 0.1474   |
| rs117625924 | 11 | 116234916 | C | A | -0.352 | 0.7251 | -? | 0      | 0      | 0 | 1        |
| rs11824398  | 11 | 117481108 | A | G | 0.352  | 0.7252 | +  | 0      | 0      | 0 | 1        |
| rs2845659   | 11 | 119434282 | G | A | 0.352  | 0.7252 | +  | 0      | 0      | 0 | 1        |
| rs4938283   | 11 | 116432791 | T | C | 0.352  | 0.7252 | ++ | 0      | 0.277  | 1 | 0.5986   |
| rs11216025  | 11 | 116464111 | T | C | -0.351 | 0.7254 | -? | 0      | 0      | 0 | 1        |
| rs72994637  | 11 | 119828457 | A | G | 0.351  | 0.7254 | +  | 0      | 0      | 0 | 1        |
| rs694005    | 11 | 117464173 | T | C | -0.351 | 0.7258 | -? | 0      | 0      | 0 | 1        |
| rs45474998  | 11 | 118229679 | A | G | -0.351 | 0.7259 | -- | 0      | 0      | 1 | 0.9944   |
| rs526597    | 11 | 118546602 | G | A | 0.35   | 0.726  | +  | 0      | 0.925  | 1 | 0.336    |
| rs76383990  | 11 | 116897871 | G | A | -0.35  | 0.726  | +  | 70.6   | 10.198 | 1 | 0.001406 |
| rs2239695   | 11 | 118213632 | T | C | -0.35  | 0.7261 | -- | 0      | 0.007  | 1 | 0.9335   |
| rs10892387  | 11 | 119413149 | G | A | 0.35   | 0.7262 | +  | 0      | 0      | 0 | 1        |
| rs622860    | 11 | 117468794 | G | A | 0.35   | 0.7262 | +  | 0      | 0      | 0 | 1        |
| rs112701434 | 11 | 116797442 | C | T | -0.35  | 0.7264 | -? | 0      | 0      | 0 | 1        |
| rs1623797   | 11 | 116560447 | T | C | 0.35   | 0.7265 | +  | 0      | 0      | 0 | 1        |
| rs536031    | 11 | 117451094 | A | T | 0.35   | 0.7265 | +  | 0      | 0      | 0 | 1        |
| rs11216502  | 11 | 117557057 | C | G | 0.35   | 0.7266 | +  | 0      | 0      | 0 | 1        |
| rs688893    | 11 | 120830625 | C | T | -0.35  | 0.7266 | +  | 0      | 0.327  | 1 | 0.5677   |
| rs73576686  | 11 | 116970006 | A | T | -0.35  | 0.7266 | +  | 54     | 6.519  | 1 | 0.01067  |

|              |    |           |   |   |        |        |   |        |        |   |          |
|--------------|----|-----------|---|---|--------|--------|---|--------|--------|---|----------|
| rs144611969  | 11 | 119452937 | A | G | 0.35   | 0.7267 | + | 0      | 0      | 0 | 1        |
| rs117235919  | 11 | 121093301 | A | G | 0.349  | 0.7268 | + | 0      | 0      | 0 | 1        |
| rs2511857    | 11 | 119141812 | A | T | -0.349 | 0.7268 | - | 0      | 0      | 0 | 1        |
| rs4938780    | 11 | 119976805 | T | C | 0.349  | 0.7268 | + | 0      | 0      | 0 | 1        |
| rs7946597    | 11 | 119976523 | A | G | 0.349  | 0.7269 | + | 0      | 0      | 0 | 1        |
| rs57438673   | 11 | 118459039 | A | G | 0.349  | 0.727  | + | 0      | 0.268  | 1 | 0.6048   |
| rs11824032   | 11 | 120224789 | A | G | 0.349  | 0.7271 | + | 0      | 0      | 0 | 1        |
| rs1715443    | 11 | 118017365 | G | T | 0.349  | 0.7273 | + | 0      | 0.032  | 1 | 0.8572   |
| rs617290     | 11 | 119006462 | G | A | 0.349  | 0.7273 | + | 0      | 0      | 0 | 1        |
| rs11216645   | 11 | 117819863 | A | G | -0.349 | 0.7274 | - | 0      | 0.044  | 1 | 0.8329   |
| rs4936488    | 11 | 119479922 | A | G | 0.349  | 0.7274 | + | 0      | 0      | 0 | 1        |
| rs12787202   | 11 | 118226011 | T | C | -0.349 | 0.7275 | - | 0      | 0.001  | 1 | 0.9809   |
| rs6589615    | 11 | 117455699 | C | G | 0.348  | 0.7275 | + | 0      | 0      | 0 | 1        |
| rs9332793    | 11 | 118354458 | A | G | -0.348 | 0.7275 | - | -132.8 | 1.289  | 1 | 0.2563   |
| rs9332794    | 11 | 118354505 | T | G | -0.348 | 0.7275 | - | -132.8 | 1.289  | 1 | 0.2563   |
| rs10790396   | 11 | 120551561 | A | G | -0.348 | 0.7277 | - | 0      | 0      | 0 | 1        |
| rs11216643   | 11 | 117818843 | A | T | -0.348 | 0.7277 | - | 0      | 0.045  | 1 | 0.8327   |
| rs516655     | 11 | 117709028 | G | A | -0.348 | 0.7277 | - | 0      | 0      | 0 | 1        |
| rs541612     | 11 | 119739796 | T | C | 0.348  | 0.7277 | + | 0      | 0      | 0 | 1        |
| rs11216916   | 11 | 118461605 | C | T | 0.348  | 0.7278 | + | 0      | 0.25   | 1 | 0.6169   |
| rs182784500  | 11 | 121071161 | G | A | -0.348 | 0.7278 | - | 0      | 0      | 0 | 1        |
| rs2077623    | 11 | 120607495 | T | C | 0.348  | 0.728  | + | 0      | 0      | 0 | 1        |
| rs505824     | 11 | 117447031 | T | C | 0.348  | 0.728  | + | 0      | 0      | 0 | 1        |
| rs3949025    | 11 | 117954724 | A | G | 0.348  | 0.7281 | + | 0      | 0.262  | 1 | 0.609    |
| rs180374     | 11 | 116591418 | A | G | -0.348 | 0.7282 | - | -8.7   | 2.76   | 1 | 0.09665  |
| rs487177     | 11 | 118657297 | G | C | -0.348 | 0.7282 | - | 0      | 0.159  | 1 | 0.6898   |
| rs11601324   | 11 | 117731269 | C | G | -0.347 | 0.7283 | - | 0      | 0      | 0 | 1        |
| rs116863015  | 11 | 120123837 | A | G | 0.347  | 0.7284 | + | 0      | 0      | 0 | 1        |
| rs1613643    | 11 | 118068521 | T | G | 0.347  | 0.7285 | + | 0      | 0      | 0 | 1        |
| rs61407825   | 11 | 117331806 | T | C | -0.347 | 0.7285 | - | 0      | 0      | 0 | 1        |
| rs3863314    | 11 | 117313086 | A | G | 0.347  | 0.7286 | + | 0      | 0      | 0 | 1        |
| rs4938795    | 11 | 120184592 | A | G | -0.347 | 0.7286 | - | 0      | 0      | 0 | 1        |
| rs58068870   | 11 | 116948368 | C | T | -0.347 | 0.7286 | - | 70.7   | 10.238 | 1 | 0.001376 |
| rs948029     | 11 | 120615697 | T | A | 0.347  | 0.7286 | + | 0      | 0      | 0 | 1        |
| rs56104144   | 11 | 118666289 | C | G | -0.347 | 0.7287 | - | 0      | 0.059  | 1 | 0.8086   |
| rs77320801   | 11 | 116836349 | T | C | 0.347  | 0.7287 | + | 0      | 0      | 0 | 1        |
| rs10750157   | 11 | 119440533 | T | C | -0.347 | 0.7288 | - | 0      | 0      | 0 | 1        |
| rs1892974    | 11 | 120614390 | T | A | 0.347  | 0.7288 | + | 0      | 0      | 0 | 1        |
| rs11216392   | 11 | 117313174 | T | C | -0.347 | 0.7289 | - | 0      | 0      | 0 | 1        |
| rs10892662   | 11 | 120896545 | T | G | -0.346 | 0.7292 | - | 0      | 0      | 0 | 1        |
| rs12289253   | 11 | 118405068 | G | A | 0.346  | 0.7293 | + | 0      | 0.041  | 1 | 0.8388   |
| rs1509464    | 11 | 119425807 | C | T | 0.346  | 0.7293 | + | 0      | 0      | 0 | 1        |
| rs12286037   | 11 | 116652207 | T | C | -0.346 | 0.7294 | + | -57.5  | 1.905  | 1 | 0.1675   |
| rs642280     | 11 | 120833767 | C | T | -0.346 | 0.7294 | - | 0      | 0.324  | 1 | 0.5691   |
| rs880615     | 11 | 117303393 | T | C | -0.346 | 0.7294 | - | 0      | 0      | 0 | 1        |
| rs11600193   | 11 | 119607719 | C | T | 0.346  | 0.7295 | + | 0      | 0      | 0 | 1        |
| rs4938485    | 11 | 117992620 | G | A | -0.346 | 0.7295 | - | 0      | 0.001  | 1 | 0.9799   |
| rs17123485   | 11 | 119792173 | C | T | -0.346 | 0.7296 | - | 0      | 0      | 0 | 1        |
| rs656382     | 11 | 119841515 | T | C | 0.346  | 0.7296 | + | 0      | 0      | 0 | 1        |
| rs7105596    | 11 | 119656950 | C | T | 0.346  | 0.7296 | + | 0      | 0.012  | 1 | 0.9139   |
| rs1376996225 | 11 | 121192989 | T | G | -0.346 | 0.7297 | - | 0      | 0      | 0 | 1        |
| rs607527     | 11 | 118538187 | T | G | 0.345  | 0.7298 | - | 0      | 0.862  | 1 | 0.3533   |
| rs12794546   | 11 | 121062593 | T | C | -0.345 | 0.73   | - | 0      | 0      | 0 | 1        |
| rs2508991    | 11 | 118539522 | A | G | 0.345  | 0.73   | - | 0      | 0.898  | 1 | 0.3432   |
| rs495473     | 11 | 117212908 | G | A | 0.345  | 0.73   | + | 0      | 0      | 0 | 1        |
| rs7110197    | 11 | 118228624 | C | G | -0.345 | 0.7301 | - | 0      | 0      | 1 | 0.997    |

|             |    |           |   |   |        |        |     |        |       |   |        |
|-------------|----|-----------|---|---|--------|--------|-----|--------|-------|---|--------|
| rs61907602  | 11 | 116810655 | C | G | -0.345 | 0.7302 | -?  | 0      | 0     | 0 | 1      |
| rs7941912   | 11 | 116815762 | A | G | -0.345 | 0.7302 | -?  | 0      | 0     | 0 | 1      |
| rs4938281   | 11 | 116430875 | G | A | 0.345  | 0.7303 | +?  | 0      | 0     | 0 | 1      |
| rs61747468  | 11 | 119881864 | A | G | -0.345 | 0.7303 | -?  | 0      | 0     | 0 | 1      |
| rs11216914  | 11 | 118456414 | C | T | 0.345  | 0.7304 | +-- | 0      | 0.271 | 1 | 0.6024 |
| rs3782045   | 11 | 118233078 | G | A | -0.345 | 0.7304 | --  | 0      | 0     | 1 | 0.9861 |
| rs1073388   | 11 | 120611792 | G | C | 0.344  | 0.7305 | +?  | 0      | 0     | 0 | 1      |
| rs2187495   | 11 | 120611308 | T | C | 0.344  | 0.7305 | +?  | 0      | 0     | 0 | 1      |
| rs45534632  | 11 | 118840705 | G | A | 0.344  | 0.7305 | +?  | 0      | 0     | 0 | 1      |
| rs55736521  | 11 | 118840506 | T | C | 0.344  | 0.7305 | +?  | 0      | 0     | 0 | 1      |
| rs620168    | 11 | 119012321 | G | C | 0.344  | 0.7306 | +?  | 0      | 0     | 0 | 1      |
| rs11216006  | 11 | 116432066 | T | C | 0.344  | 0.7307 | ++  | 0      | 0.29  | 1 | 0.5902 |
| rs35305304  | 11 | 118228114 | T | C | -0.344 | 0.7307 | --  | 0      | 0     | 1 | 0.9958 |
| rs61900876  | 11 | 120395800 | C | T | 0.344  | 0.7309 | +?  | 0      | 0     | 0 | 1      |
| rs504626    | 11 | 120976428 | A | G | -0.344 | 0.731  | -?  | 0      | 0     | 0 | 1      |
| rs11215927  | 11 | 116300551 | C | T | -0.344 | 0.7312 | -?  | 0      | 0     | 0 | 1      |
| rs117837319 | 11 | 116584447 | C | A | -0.343 | 0.7313 | --  | 0      | 0.024 | 1 | 0.8776 |
| rs1786142   | 11 | 118995481 | C | T | 0.343  | 0.7313 | +?  | 0      | 0     | 0 | 1      |
| rs687329    | 11 | 121023906 | G | A | -0.343 | 0.7314 | -?  | 0      | 0     | 0 | 1      |
| rs11605423  | 11 | 117618713 | A | G | 0.343  | 0.7315 | +?  | 0      | 0     | 0 | 1      |
| rs12291885  | 11 | 117027942 | C | T | -0.343 | 0.7316 | -?  | 0      | 0     | 0 | 1      |
| rs10790284  | 11 | 118996948 | C | A | 0.343  | 0.7318 | +?  | 0      | 0     | 0 | 1      |
| rs148643334 | 11 | 118358152 | C | T | -0.343 | 0.7318 | +-  | -143.5 | 1.232 | 1 | 0.267  |
| rs3825054   | 11 | 118234191 | A | G | -0.343 | 0.732  | --  | 0      | 0     | 1 | 0.9935 |
| rs73020445  | 11 | 117752845 | T | C | -0.342 | 0.732  | -?  | 0      | 0     | 0 | 1      |
| rs12275789  | 11 | 116345605 | A | G | 0.342  | 0.7321 | +?  | 0      | 0     | 0 | 1      |
| rs61528732  | 11 | 120212601 | C | T | -0.342 | 0.7321 | -?  | 0      | 0     | 0 | 1      |
| rs61906487  | 11 | 117088821 | T | C | -0.342 | 0.7323 | -?  | 0      | 0     | 0 | 1      |
| rs61906488  | 11 | 117089505 | C | T | -0.342 | 0.7323 | -?  | 0      | 0     | 0 | 1      |
| rs61906489  | 11 | 117091153 | G | C | -0.342 | 0.7323 | -?  | 0      | 0     | 0 | 1      |
| rs73009920  | 11 | 117850727 | T | C | 0.342  | 0.7323 | +?  | 0      | 0     | 0 | 1      |
| rs624877    | 11 | 119966457 | T | C | 0.342  | 0.7324 | +?  | 0      | 0     | 0 | 1      |
| rs12286173  | 11 | 120486195 | T | C | 0.342  | 0.7326 | +?  | 0      | 0     | 0 | 1      |
| rs534279    | 11 | 119358442 | G | A | -0.342 | 0.7326 | -?  | 0      | 0     | 0 | 1      |
| rs10892221  | 11 | 118040642 | A | G | 0.342  | 0.7327 | +-  | 0      | 0.225 | 1 | 0.635  |
| rs543312    | 11 | 117745659 | C | T | 0.342  | 0.7327 | +?  | 0      | 0     | 0 | 1      |
| rs7124166   | 11 | 119630247 | C | G | 0.341  | 0.7328 | +?  | 0      | 0     | 0 | 1      |
| rs17569224  | 11 | 116356327 | T | C | 0.341  | 0.7329 | +?  | 0      | 0     | 0 | 1      |
| rs56160707  | 11 | 120586577 | C | T | 0.341  | 0.7331 | +?  | 0      | 0     | 0 | 1      |
| rs583490    | 11 | 118022608 | A | G | -0.341 | 0.7331 | +-  | 0      | 0.561 | 1 | 0.4537 |
| rs60336713  | 11 | 120054885 | T | C | -0.341 | 0.7332 | -?  | 0      | 0     | 0 | 1      |
| rs657671    | 11 | 117917622 | C | T | -0.34  | 0.7336 | -?  | 0      | 0     | 0 | 1      |
| rs4328225   | 11 | 119478241 | T | A | 0.34   | 0.7337 | +?  | 0      | 0     | 0 | 1      |
| rs678776    | 11 | 117696744 | A | G | 0.34   | 0.7337 | +?  | 0      | 0     | 0 | 1      |
| rs117052388 | 11 | 121143154 | T | C | 0.34   | 0.7338 | +?  | 0      | 0     | 0 | 1      |
| rs10892222  | 11 | 118041102 | A | G | 0.34   | 0.7339 | +-  | 0      | 0.228 | 1 | 0.633  |
| rs10892480  | 11 | 119737648 | A | G | 0.34   | 0.734  | +?  | 0      | 0     | 0 | 1      |
| rs116981723 | 11 | 120888244 | T | C | 0.34   | 0.734  | +?  | 0      | 0     | 0 | 1      |
| rs6589646   | 11 | 117977949 | T | C | -0.34  | 0.7341 | +-  | 0      | 0.455 | 1 | 0.5    |
| rs2289893   | 11 | 116720089 | T | C | 0.34   | 0.7342 | +?  | 0      | 0     | 0 | 1      |
| rs3133860   | 11 | 120661178 | T | A | 0.339  | 0.7344 | +?  | 0      | 0     | 0 | 1      |
| rs670       | 11 | 116708413 | T | C | 0.339  | 0.7344 | +?  | 0      | 0     | 0 | 1      |
| rs118100246 | 11 | 117326419 | A | G | -0.339 | 0.7345 | -?  | 0      | 0     | 0 | 1      |
| rs684613    | 11 | 120836290 | T | C | -0.339 | 0.7346 | +-  | 0      | 0.32  | 1 | 0.5718 |
| rs526573    | 11 | 119000070 | A | G | 0.339  | 0.7347 | +?  | 0      | 0     | 0 | 1      |
| rs151061355 | 11 | 116586854 | A | G | -0.339 | 0.7348 | --  | 0      | 0.025 | 1 | 0.8755 |

|             |    |           |   |   |        |        |    |      |        |   |           |
|-------------|----|-----------|---|---|--------|--------|----|------|--------|---|-----------|
| rs11217329  | 11 | 119453252 | A | G | -0.339 | 0.7349 | -? | 0    | 0      | 0 | 1         |
| rs1396776   | 11 | 119453579 | C | A | -0.339 | 0.7349 | -? | 0    | 0      | 0 | 1         |
| rs148406383 | 11 | 117328052 | T | C | -0.339 | 0.7349 | -? | 0    | 0      | 0 | 1         |
| rs492275    | 11 | 120076931 | T | C | 0.339  | 0.7349 | +  | 0    | 0      | 0 | 1         |
| rs57963928  | 11 | 116306360 | C | A | -0.339 | 0.7349 | -? | 0    | 0      | 0 | 1         |
| rs77822137  | 11 | 116914260 | C | T | -0.339 | 0.7349 | -+ | 71   | 10.332 | 1 | 0.001308  |
| rs520543    | 11 | 118538157 | A | G | 0.338  | 0.735  | -+ | 0    | 0.827  | 1 | 0.3631    |
| rs60112336  | 11 | 118453483 | T | C | 0.338  | 0.735  | +- | 0    | 0.186  | 1 | 0.6663    |
| rs11217602  | 11 | 119833857 | T | C | 0.338  | 0.7351 | +  | 0    | 0      | 0 | 1         |
| rs586473    | 11 | 121000784 | T | C | -0.338 | 0.7353 | -? | 0    | 0      | 0 | 1         |
| rs61905305  | 11 | 117314122 | T | C | -0.338 | 0.7354 | -? | 0    | 0      | 0 | 1         |
| rs12098917  | 11 | 117716151 | C | T | -0.338 | 0.7355 | -? | 0    | 0      | 0 | 1         |
| rs896695    | 11 | 120075939 | T | C | 0.338  | 0.7356 | +  | 0    | 0      | 0 | 1         |
| rs10790187  | 11 | 117324965 | G | A | 0.338  | 0.7357 | +  | 0    | 0      | 0 | 1         |
| rs77393043  | 11 | 116908914 | A | C | -0.338 | 0.7357 | -+ | 73.5 | 11.304 | 1 | 0.0007736 |
| rs77939786  | 11 | 116908913 | T | C | -0.338 | 0.7357 | -+ | 73.5 | 11.304 | 1 | 0.0007736 |
| rs78550859  | 11 | 116906984 | T | C | -0.338 | 0.7357 | -+ | 73.5 | 11.304 | 1 | 0.0007736 |
| rs79842631  | 11 | 116908807 | G | A | -0.338 | 0.7357 | -+ | 73.5 | 11.304 | 1 | 0.0007736 |
| rs80176870  | 11 | 116905209 | C | T | -0.338 | 0.7357 | -+ | 73.5 | 11.304 | 1 | 0.0007736 |
| rs36061634  | 11 | 118225452 | A | T | -0.337 | 0.7359 | -- | 0    | 0      | 1 | 0.9861    |
| rs149539291 | 11 | 117908503 | A | G | -0.337 | 0.7361 | -? | 0    | 0      | 0 | 1         |
| rs11600354  | 11 | 120477883 | A | G | 0.337  | 0.7362 | +  | 0    | 0      | 0 | 1         |
| rs180354    | 11 | 116599826 | T | C | -0.337 | 0.7362 | -+ | -9.9 | 2.729  | 1 | 0.09853   |
| rs180355    | 11 | 116599771 | T | C | -0.337 | 0.7362 | -+ | -9.9 | 2.729  | 1 | 0.09853   |
| rs2282495   | 11 | 117865381 | T | C | 0.337  | 0.7363 | +  | 0    | 0      | 0 | 1         |
| rs479299    | 11 | 121003848 | A | G | -0.337 | 0.7363 | -? | 0    | 0      | 0 | 1         |
| rs61900877  | 11 | 120396041 | C | G | 0.337  | 0.7364 | +  | 0    | 0      | 0 | 1         |
| rs111708971 | 11 | 116883241 | A | T | -0.336 | 0.7365 | -? | 0    | 0      | 0 | 1         |
| rs518087    | 11 | 116490583 | C | T | 0.336  | 0.7366 | +  | 0    | 0      | 0 | 1         |
| rs180324    | 11 | 116625332 | C | T | -0.336 | 0.7369 | -+ | -9.2 | 2.748  | 1 | 0.0974    |
| rs180325    | 11 | 116625294 | C | G | -0.336 | 0.7369 | -+ | -9.2 | 2.748  | 1 | 0.0974    |
| rs12225323  | 11 | 117920577 | T | C | 0.336  | 0.737  | +  | 0    | 0      | 0 | 1         |
| rs603486    | 11 | 118587347 | T | C | 0.336  | 0.7371 | +  | 0    | 0      | 0 | 1         |
| rs658922    | 11 | 119004686 | A | T | 0.335  | 0.7374 | +  | 0    | 0      | 0 | 1         |
| rs17742     | 11 | 118473385 | C | T | 0.335  | 0.7377 | +- | 0    | 0.246  | 1 | 0.62      |
| rs73576682  | 11 | 116968225 | G | A | -0.335 | 0.7377 | +- | 54.3 | 6.562  | 1 | 0.01042   |
| rs7939209   | 11 | 116969416 | C | T | -0.335 | 0.7377 | +- | 54.3 | 6.562  | 1 | 0.01042   |
| rs7939303   | 11 | 116969439 | C | T | -0.335 | 0.7377 | +- | 54.3 | 6.562  | 1 | 0.01042   |
| rs2241646   | 11 | 119229964 | G | A | 0.335  | 0.7378 | +  | 0    | 0      | 0 | 1         |
| rs11217788  | 11 | 120155118 | A | G | -0.335 | 0.7379 | -? | 0    | 0      | 0 | 1         |
| rs4938282   | 11 | 116430949 | T | C | 0.335  | 0.7379 | +  | 0    | 0      | 0 | 1         |
| rs73013776  | 11 | 117917257 | G | A | -0.335 | 0.7379 | -? | 0    | 0      | 0 | 1         |
| rs658624    | 11 | 118018767 | G | A | 0.334  | 0.738  | ++ | 0    | 0.027  | 1 | 0.8699    |
| rs80006645  | 11 | 119884588 | A | G | 0.335  | 0.738  | +  | 0    | 0      | 0 | 1         |
| rs35825681  | 11 | 119732550 | G | C | 0.334  | 0.7381 | +  | 0    | 0      | 0 | 1         |
| rs73001486  | 11 | 118629364 | A | G | -0.334 | 0.7383 | -+ | 0    | 0.249  | 1 | 0.6177    |
| rs11216925  | 11 | 118471423 | C | T | 0.334  | 0.7385 | +- | 0    | 0.302  | 1 | 0.5825    |
| rs17122113  | 11 | 118234678 | G | A | -0.334 | 0.7385 | -- | 0    | 0      | 1 | 0.9984    |
| rs73576687  | 11 | 116970285 | A | G | -0.334 | 0.7385 | +- | 54.3 | 6.565  | 1 | 0.0104    |
| rs11217689  | 11 | 119965319 | G | C | 0.334  | 0.7386 | +  | 0    | 0      | 0 | 1         |
| rs582951    | 11 | 119965482 | G | A | 0.334  | 0.7386 | +  | 0    | 0      | 0 | 1         |
| rs626302    | 11 | 119965383 | A | G | 0.334  | 0.7386 | +  | 0    | 0      | 0 | 1         |
| rs637685    | 11 | 119965639 | A | G | 0.334  | 0.7386 | +  | 0    | 0      | 0 | 1         |
| rs7936665   | 11 | 120147254 | A | G | -0.334 | 0.7386 | -? | 0    | 0      | 0 | 1         |
| rs12421460  | 11 | 119469767 | T | C | -0.333 | 0.7389 | -? | 0    | 0      | 0 | 1         |
| rs2946743   | 11 | 118017088 | G | A | 0.333  | 0.739  | ++ | 0    | 0.05   | 1 | 0.8229    |

|              |    |           |   |   |        |        |    |       |       |   |        |
|--------------|----|-----------|---|---|--------|--------|----|-------|-------|---|--------|
| rs74508982   | 11 | 116301080 | T | C | -0.333 | 0.739  | -? | 0     | 0     | 0 | 1      |
| rs10750159   | 11 | 119448679 | G | A | 0.333  | 0.7391 | +? | 0     | 0     | 0 | 1      |
| rs111894427  | 11 | 116721405 | T | C | -0.333 | 0.7393 | -? | 0     | 0     | 0 | 1      |
| rs11216168   | 11 | 116741553 | A | G | 0.333  | 0.7394 | +? | 0     | 0     | 0 | 1      |
| rs670973     | 11 | 121001689 | A | C | -0.333 | 0.7394 | -? | 0     | 0     | 0 | 1      |
| rs73020446   | 11 | 117753244 | T | C | -0.332 | 0.7396 | -? | 0     | 0     | 0 | 1      |
| rs180356     | 11 | 116599534 | T | C | -0.332 | 0.7398 | -+ | -10.3 | 2.72  | 1 | 0.0991 |
| rs180358     | 11 | 116599392 | T | C | -0.332 | 0.7398 | -+ | -10.3 | 2.72  | 1 | 0.0991 |
| rs180359     | 11 | 116599281 | G | A | -0.332 | 0.7398 | -+ | -10.3 | 2.72  | 1 | 0.0991 |
| rs181268545  | 11 | 119479675 | A | G | 0.332  | 0.7398 | +? | 0     | 0     | 0 | 1      |
| rs489454     | 11 | 120077259 | A | G | 0.332  | 0.74   | +? | 0     | 0     | 0 | 1      |
| rs536743     | 11 | 120078136 | A | C | 0.332  | 0.74   | +? | 0     | 0     | 0 | 1      |
| rs1894177    | 11 | 117978264 | A | G | -0.332 | 0.7401 | -+ | 0     | 0.461 | 1 | 0.4973 |
| rs35902434   | 11 | 118222634 | C | T | -0.332 | 0.7402 | -- | 0     | 0.002 | 1 | 0.9679 |
| rs12721078   | 11 | 116699395 | A | C | -0.331 | 0.7403 | -? | 0     | 0     | 0 | 1      |
| rs2156636    | 11 | 120770782 | A | G | 0.331  | 0.7403 | +? | 0     | 0     | 0 | 1      |
| rs66899922   | 11 | 116334862 | T | G | -0.331 | 0.7403 | -? | 0     | 0     | 0 | 1      |
| rs12420903   | 11 | 120074170 | T | G | 0.331  | 0.7404 | +? | 0     | 0     | 0 | 1      |
| rs11217695   | 11 | 119977625 | T | C | -0.331 | 0.7406 | -? | 0     | 0     | 0 | 1      |
| rs73004786   | 11 | 120058833 | A | G | -0.331 | 0.7406 | -? | 0     | 0     | 0 | 1      |
| rs7125516    | 11 | 117315191 | C | T | 0.331  | 0.7409 | +? | 0     | 0     | 0 | 1      |
| rs1799993    | 11 | 118958127 | A | C | -0.33  | 0.7412 | -? | 0     | 0     | 0 | 1      |
| rs1358104428 | 11 | 119754895 | A | G | -0.33  | 0.7413 | -? | 0     | 0     | 0 | 1      |
| rs547345     | 11 | 118997869 | C | T | 0.33   | 0.7414 | +? | 0     | 0     | 0 | 1      |
| rs10892420   | 11 | 119478022 | G | A | 0.33   | 0.7415 | +? | 0     | 0     | 0 | 1      |
| rs2252222    | 11 | 120400419 | G | A | 0.33   | 0.7415 | +? | 0     | 0     | 0 | 1      |
| rs61900875   | 11 | 120395705 | G | A | 0.33   | 0.7415 | +? | 0     | 0     | 0 | 1      |
| rs1263172    | 11 | 116680918 | G | A | -0.33  | 0.7416 | -? | 0     | 0     | 0 | 1      |
| rs2845649    | 11 | 119421975 | A | G | 0.33   | 0.7416 | +? | 0     | 0     | 0 | 1      |
| rs614677     | 11 | 119884311 | T | C | 0.33   | 0.7416 | +? | 0     | 0     | 0 | 1      |
| rs61900867   | 11 | 120393284 | T | C | 0.329  | 0.7418 | +? | 0     | 0     | 0 | 1      |
| rs7924993    | 11 | 117649675 | A | G | -0.329 | 0.7419 | -? | 0     | 0     | 0 | 1      |
| rs11217906   | 11 | 120404415 | C | T | 0.329  | 0.742  | +? | 0     | 0     | 0 | 1      |
| rs12787375   | 11 | 121055191 | T | G | -0.329 | 0.7422 | -? | 0     | 0     | 0 | 1      |
| rs534427     | 11 | 119745598 | T | C | 0.329  | 0.7422 | +? | 0     | 0     | 0 | 1      |
| rs183445365  | 11 | 119263566 | A | G | -0.329 | 0.7423 | -? | 0     | 0     | 0 | 1      |
| rs504542     | 11 | 119802591 | G | T | 0.329  | 0.7423 | +? | 0     | 0     | 0 | 1      |
| rs180362     | 11 | 116598118 | G | A | -0.329 | 0.7424 | -+ | -11.7 | 2.686 | 1 | 0.1012 |
| rs1793157    | 11 | 118017434 | C | A | 0.329  | 0.7425 | ++ | 0     | 0.086 | 1 | 0.7691 |
| rs34612914   | 11 | 120553943 | G | A | 0.328  | 0.7426 | +? | 0     | 0     | 0 | 1      |
| rs61905525   | 11 | 117058854 | A | G | -0.328 | 0.7426 | -? | 0     | 0     | 0 | 1      |
| rs2852241    | 11 | 120797584 | C | T | 0.328  | 0.7429 | +? | 0     | 0     | 0 | 1      |
| rs11217326   | 11 | 119444863 | C | T | -0.327 | 0.7434 | -? | 0     | 0     | 0 | 1      |
| rs4445643    | 11 | 120497350 | T | G | 0.327  | 0.7435 | +? | 0     | 0     | 0 | 1      |
| rs61900874   | 11 | 120395521 | T | C | 0.327  | 0.7435 | +? | 0     | 0     | 0 | 1      |
| rs7103567    | 11 | 117732718 | T | C | 0.327  | 0.7437 | +? | 0     | 0     | 0 | 1      |
| rs58329329   | 11 | 117552896 | G | C | -0.327 | 0.7438 | -? | 0     | 0     | 0 | 1      |
| rs11827818   | 11 | 120198728 | G | A | 0.327  | 0.7439 | +? | 0     | 0     | 0 | 1      |
| rs17121057   | 11 | 117537132 | C | A | 0.327  | 0.7439 | +? | 0     | 0     | 0 | 1      |
| rs906822     | 11 | 119438762 | T | G | 0.327  | 0.7439 | +? | 0     | 0     | 0 | 1      |
| rs1473326    | 11 | 116823672 | C | T | 0.326  | 0.7441 | +? | 0     | 0     | 0 | 1      |
| rs10790357   | 11 | 119834038 | C | G | -0.326 | 0.7443 | -? | 0     | 0     | 0 | 1      |
| rs3133862    | 11 | 120619548 | G | T | -0.326 | 0.7444 | -? | 0     | 0     | 0 | 1      |
| rs476809     | 11 | 120080022 | G | T | 0.326  | 0.7444 | +? | 0     | 0     | 0 | 1      |
| rs477863     | 11 | 120079884 | G | T | 0.326  | 0.7444 | +? | 0     | 0     | 0 | 1      |
| rs521841     | 11 | 120080526 | C | A | 0.326  | 0.7444 | +? | 0     | 0     | 0 | 1      |

|             |    |           |   |   |        |        |   |       |        |   |          |
|-------------|----|-----------|---|---|--------|--------|---|-------|--------|---|----------|
| rs74581584  | 11 | 121121331 | C | A | 0.326  | 0.7444 | + | 0     | 0      | 0 | 1        |
| rs2228055   | 11 | 117864846 | G | A | 0.326  | 0.7445 | + | 0     | 0      | 0 | 1        |
| rs666432    | 11 | 120003533 | T | C | 0.326  | 0.7445 | + | 0     | 0      | 0 | 1        |
| rs180368    | 11 | 116593264 | T | C | -0.326 | 0.7446 | - | -10.4 | 2.719  | 1 | 0.09919  |
| rs580711    | 11 | 120809198 | G | C | -0.326 | 0.7446 | - | 0     | 0      | 0 | 1        |
| rs78043040  | 11 | 120395934 | C | T | 0.326  | 0.7446 | + | 0     | 0      | 0 | 1        |
| rs150342927 | 11 | 116934380 | T | C | -0.326 | 0.7447 | - | 71.4  | 10.478 | 1 | 0.001208 |
| rs2847499   | 11 | 120114073 | T | G | -0.326 | 0.7447 | - | 0     | 0      | 0 | 1        |
| rs57072067  | 11 | 116939370 | G | A | -0.326 | 0.7447 | - | 71.4  | 10.478 | 1 | 0.001208 |
| rs603407    | 11 | 117958396 | C | T | -0.326 | 0.7448 | - | 0     | 0      | 1 | 0.9927   |
| rs77083949  | 11 | 117490186 | T | C | 0.326  | 0.7448 | + | 0     | 0      | 0 | 1        |
| rs7925188   | 11 | 119455748 | G | A | 0.325  | 0.7449 | + | 0     | 0      | 0 | 1        |
| rs113054880 | 11 | 118459702 | G | C | 0.325  | 0.745  | + | 0     | 0.254  | 1 | 0.6144   |
| rs551199    | 11 | 120999732 | A | G | -0.325 | 0.7453 | - | 0     | 0      | 0 | 1        |
| rs643744    | 11 | 121000212 | T | G | -0.325 | 0.7453 | - | 0     | 0      | 0 | 1        |
| rs665683    | 11 | 119884384 | C | G | 0.325  | 0.7453 | + | 0     | 0      | 0 | 1        |
| rs11216613  | 11 | 117777599 | G | T | -0.325 | 0.7454 | - | 0     | 0      | 0 | 1        |
| rs6589750   | 11 | 119326726 | G | A | -0.325 | 0.7455 | - | 0     | 0      | 0 | 1        |
| rs11217350  | 11 | 119475996 | C | T | -0.324 | 0.7456 | - | 0     | 0      | 0 | 1        |
| rs645305    | 11 | 117208747 | C | T | 0.324  | 0.7456 | + | 0     | 0      | 0 | 1        |
| rs71484177  | 11 | 120396016 | G | A | 0.324  | 0.7459 | + | 0     | 0      | 0 | 1        |
| rs11216100  | 11 | 116572530 | G | C | 0.324  | 0.7461 | + | 0     | 0      | 0 | 1        |
| rs549748    | 11 | 117341617 | A | T | -0.324 | 0.7461 | - | 0     | 0      | 0 | 1        |
| rs10790359  | 11 | 119843707 | G | A | -0.324 | 0.7462 | - | 0     | 0      | 0 | 1        |
| rs10790360  | 11 | 119843736 | C | A | -0.324 | 0.7462 | - | 0     | 0      | 0 | 1        |
| rs11216924  | 11 | 118470092 | G | C | 0.324  | 0.7462 | + | 0     | 0.225  | 1 | 0.6356   |
| rs6589795   | 11 | 119970508 | T | C | 0.324  | 0.7462 | + | 0     | 0      | 0 | 1        |
| rs74453782  | 11 | 117588461 | T | C | 0.323  | 0.7464 | + | 0     | 0      | 0 | 1        |
| rs606970    | 11 | 119989892 | G | A | -0.323 | 0.747  | - | 0     | 0      | 0 | 1        |
| rs493516    | 11 | 117213160 | A | G | 0.322  | 0.7471 | + | 0     | 0      | 0 | 1        |
| rs10790398  | 11 | 120551684 | T | C | -0.322 | 0.7472 | - | 0     | 0      | 0 | 1        |
| rs61906109  | 11 | 116554228 | A | C | 0.322  | 0.7472 | + | 0     | 0      | 0 | 1        |
| rs76921569  | 11 | 117671216 | A | C | 0.322  | 0.7473 | + | 0     | 0      | 0 | 1        |
| rs79046029  | 11 | 117675125 | T | C | 0.322  | 0.7473 | + | 0     | 0      | 0 | 1        |
| rs11216566  | 11 | 117697985 | G | A | 0.322  | 0.7474 | + | 0     | 0      | 0 | 1        |
| rs675855    | 11 | 117913374 | T | G | 0.322  | 0.7475 | + | 0     | 0.303  | 1 | 0.582    |
| rs11216036  | 11 | 116470373 | T | A | 0.321  | 0.7479 | + | 0     | 0      | 0 | 1        |
| rs506305    | 11 | 116520469 | T | C | -0.321 | 0.748  | - | 0     | 0      | 0 | 1        |
| rs118179203 | 11 | 121134520 | T | C | 0.321  | 0.7481 | + | 0     | 0      | 0 | 1        |
| rs12795183  | 11 | 119416614 | T | A | 0.321  | 0.7483 | + | 0     | 0      | 0 | 1        |
| rs12270397  | 11 | 120248342 | T | C | 0.321  | 0.7484 | + | 0     | 0      | 0 | 1        |
| rs2663629   | 11 | 119435180 | A | C | 0.321  | 0.7484 | + | 0     | 0      | 0 | 1        |
| rs626466    | 11 | 119837112 | T | C | 0.32   | 0.7486 | + | 0     | 0      | 0 | 1        |
| rs75858010  | 11 | 119790617 | T | C | 0.32   | 0.7486 | + | 0     | 0      | 0 | 1        |
| rs11216727  | 11 | 117914652 | C | G | 0.32   | 0.7487 | + | 0     | 0      | 0 | 1        |
| rs12807982  | 11 | 119985475 | A | C | -0.32  | 0.7487 | - | 0     | 0      | 0 | 1        |
| rs7947434   | 11 | 117311608 | G | C | -0.32  | 0.7487 | - | 0     | 0      | 0 | 1        |
| rs875209    | 11 | 117208270 | A | G | 0.32   | 0.7488 | + | 0     | 0      | 0 | 1        |
| rs497960    | 11 | 116317663 | C | T | -0.32  | 0.749  | - | 0     | 0      | 0 | 1        |
| rs536021    | 11 | 117210901 | C | T | 0.32   | 0.7491 | + | 0     | 0      | 0 | 1        |
| rs118046012 | 11 | 116590528 | A | G | -0.32  | 0.7492 | - | 0     | 0.028  | 1 | 0.8669   |
| rs139663973 | 11 | 116893588 | C | T | -0.32  | 0.7492 | - | 0     | 0      | 0 | 1        |
| rs573801    | 11 | 117209268 | T | C | 0.32   | 0.7492 | + | 0     | 0      | 0 | 1        |
| rs10736494  | 11 | 118518227 | T | C | -0.32  | 0.7493 | - | 0     | 0.12   | 1 | 0.7293   |
| rs1317876   | 11 | 117958909 | G | A | -0.32  | 0.7493 | - | 0     | 0.002  | 1 | 0.9677   |
| rs3018387   | 11 | 118016981 | T | A | 0.32   | 0.7493 | + | 0     | 0.063  | 1 | 0.8015   |

|             |    |           |   |   |        |        |     |        |        |   |          |
|-------------|----|-----------|---|---|--------|--------|-----|--------|--------|---|----------|
| rs3135932   | 11 | 117864063 | G | A | 0.319  | 0.7494 | ++  | 0      | 0.193  | 1 | 0.6608   |
| rs45489394  | 11 | 118228968 | G | C | -0.319 | 0.7494 | -+  | 0      | 0.696  | 1 | 0.4042   |
| rs76814754  | 11 | 116557959 | T | C | -0.319 | 0.7494 | -?  | 0      | 0      | 0 | 1        |
| rs1508099   | 11 | 116338514 | C | A | 0.319  | 0.7495 | +?  | 0      | 0      | 0 | 1        |
| rs4936563   | 11 | 120793442 | T | C | -0.319 | 0.7497 | +-- | 0      | 0.553  | 1 | 0.457    |
| rs11215900  | 11 | 116207032 | T | C | -0.319 | 0.7498 | -?  | 0      | 0      | 0 | 1        |
| rs116083223 | 11 | 119908015 | A | G | 0.319  | 0.7498 | +?  | 0      | 0      | 0 | 1        |
| rs149017065 | 11 | 116228735 | A | G | -0.319 | 0.7501 | -?  | 0      | 0      | 0 | 1        |
| rs2663634   | 11 | 119438208 | T | C | -0.319 | 0.7501 | -?  | 0      | 0      | 0 | 1        |
| rs475385    | 11 | 117212892 | T | C | 0.318  | 0.7503 | +?  | 0      | 0      | 0 | 1        |
| rs77404358  | 11 | 120395962 | C | T | 0.318  | 0.7504 | +?  | 0      | 0      | 0 | 1        |
| rs11216644  | 11 | 117819411 | T | C | -0.318 | 0.7505 | --  | 0      | 0.052  | 1 | 0.8193   |
| rs1354975   | 11 | 116352339 | T | C | -0.318 | 0.7506 | -?  | 0      | 0      | 0 | 1        |
| rs56143464  | 11 | 116627056 | A | G | -0.318 | 0.7507 | +-- | 1.4    | 3.044  | 1 | 0.08103  |
| rs61905112  | 11 | 116628057 | A | G | -0.318 | 0.7507 | +-- | 1.4    | 3.044  | 1 | 0.08103  |
| rs12577828  | 11 | 117592582 | A | G | 0.318  | 0.7508 | +?  | 0      | 0      | 0 | 1        |
| rs556550    | 11 | 116317405 | G | A | -0.317 | 0.7509 | -?  | 0      | 0      | 0 | 1        |
| rs4499035   | 11 | 118610463 | T | C | -0.317 | 0.7512 | -+  | 0      | 0.326  | 1 | 0.5682   |
| rs596134    | 11 | 117984623 | C | T | -0.317 | 0.7513 | --  | 0      | 0.012  | 1 | 0.9128   |
| rs2230297   | 11 | 120745874 | T | C | -0.317 | 0.7515 | -?  | 0      | 0      | 0 | 1        |
| rs140189045 | 11 | 119806408 | A | G | -0.316 | 0.7517 | -?  | 0      | 0      | 0 | 1        |
| rs2715881   | 11 | 120126277 | T | C | -0.316 | 0.7517 | -?  | 0      | 0      | 0 | 1        |
| rs77026903  | 11 | 117398435 | T | C | 0.316  | 0.7518 | +?  | 0      | 0      | 0 | 1        |
| rs11601365  | 11 | 116214361 | G | C | -0.316 | 0.7519 | +-- | 6.6    | 3.213  | 1 | 0.07306  |
| rs12278345  | 11 | 120058685 | G | T | -0.316 | 0.7519 | +-- | 0      | 0.326  | 1 | 0.5682   |
| rs2851407   | 11 | 116333088 | T | C | -0.316 | 0.7519 | -?  | 0      | 0      | 0 | 1        |
| rs45522239  | 11 | 118405438 | G | A | 0.316  | 0.7523 | ++  | 0      | 0      | 1 | 0.9949   |
| rs74384044  | 11 | 121138747 | A | G | 0.316  | 0.7523 | +?  | 0      | 0      | 0 | 1        |
| rs1110166   | 11 | 119571975 | A | G | -0.315 | 0.7526 | -?  | 0      | 0      | 0 | 1        |
| rs61906084  | 11 | 116539025 | G | C | 0.315  | 0.7526 | +?  | 0      | 0      | 0 | 1        |
| rs116977890 | 11 | 121010814 | A | C | 0.315  | 0.7527 | +?  | 0      | 0      | 0 | 1        |
| rs10502235  | 11 | 120212423 | G | A | 0.315  | 0.7528 | +?  | 0      | 0      | 0 | 1        |
| rs533993    | 11 | 118989739 | G | A | 0.315  | 0.7528 | +?  | 0      | 0      | 0 | 1        |
| rs505123    | 11 | 116319242 | T | G | -0.315 | 0.753  | -?  | 0      | 0      | 0 | 1        |
| rs11216907  | 11 | 118444525 | A | G | 0.315  | 0.7531 | +-- | 0      | 0.211  | 1 | 0.646    |
| rs2663632   | 11 | 119436769 | A | G | 0.314  | 0.7533 | +?  | 0      | 0      | 0 | 1        |
| rs2845655   | 11 | 119437201 | T | C | 0.314  | 0.7533 | +?  | 0      | 0      | 0 | 1        |
| rs7106641   | 11 | 116758101 | G | A | -0.314 | 0.7534 | -?  | 0      | 0      | 0 | 1        |
| rs948181    | 11 | 117208949 | T | C | 0.314  | 0.7535 | +?  | 0      | 0      | 0 | 1        |
| rs2509671   | 11 | 119175075 | A | C | -0.314 | 0.7537 | -+  | -184.2 | 1.056  | 1 | 0.3042   |
| rs474891    | 11 | 117212337 | T | G | 0.314  | 0.7537 | +?  | 0      | 0      | 0 | 1        |
| rs561473    | 11 | 117212640 | C | T | 0.314  | 0.7537 | +?  | 0      | 0      | 0 | 1        |
| rs150817479 | 11 | 116904279 | A | G | -0.314 | 0.7538 | -+  | 71.4   | 10.496 | 1 | 0.001196 |
| rs75467870  | 11 | 117667524 | A | G | 0.314  | 0.7538 | ++  | 0      | 0      | 1 | 0.9951   |
| rs12808008  | 11 | 119985570 | G | A | -0.313 | 0.754  | -?  | 0      | 0      | 0 | 1        |
| rs112996178 | 11 | 118609598 | T | C | -0.313 | 0.7541 | -+  | 0      | 0.323  | 1 | 0.5696   |
| rs643153    | 11 | 119788216 | C | T | -0.313 | 0.7541 | -?  | 0      | 0      | 0 | 1        |
| rs12576767  | 11 | 117915055 | T | C | 0.313  | 0.7542 | +?  | 0      | 0      | 0 | 1        |
| rs15818     | 11 | 118952173 | G | A | -0.313 | 0.7546 | -?  | 0      | 0      | 0 | 1        |
| rs4252309   | 11 | 117865859 | C | T | 0.313  | 0.7546 | +?  | 0      | 0      | 0 | 1        |
| rs470370    | 11 | 120013984 | C | T | -0.313 | 0.7546 | -?  | 0      | 0      | 0 | 1        |
| rs59266239  | 11 | 116911077 | T | C | 0.312  | 0.7549 | +?  | 0      | 0      | 0 | 1        |
| rs6589562   | 11 | 116583439 | A | G | -0.312 | 0.7551 | -?  | 0      | 0      | 0 | 1        |
| rs45548238  | 11 | 118405437 | T | C | 0.312  | 0.7552 | ++  | 0      | 0      | 1 | 0.9967   |
| rs1893029   | 11 | 118610826 | T | G | -0.312 | 0.7553 | -+  | 0      | 0.337  | 1 | 0.5618   |
| rs7103001   | 11 | 118367669 | T | A | -0.312 | 0.7554 | -+  | -160.4 | 1.152  | 1 | 0.2831   |

|             |    |           |   |   |        |        |   |       |       |   |         |
|-------------|----|-----------|---|---|--------|--------|---|-------|-------|---|---------|
| rs117934631 | 11 | 120089082 | G | T | 0.311  | 0.7555 | + | 0     | 0     | 0 | 1       |
| rs35327319  | 11 | 119262493 | G | T | -0.311 | 0.7555 | - | 0     | 0     | 0 | 1       |
| rs10790204  | 11 | 117627333 | A | G | 0.311  | 0.7556 | + | 0     | 0     | 0 | 1       |
| rs76116075  | 11 | 119824100 | G | A | -0.311 | 0.7556 | - | 0     | 0     | 0 | 1       |
| rs645545    | 11 | 120853317 | A | T | -0.311 | 0.7557 | + | 0     | 0.302 | 1 | 0.5827  |
| rs578781    | 11 | 117210707 | A | G | 0.311  | 0.7558 | + | 0     | 0     | 0 | 1       |
| rs17123861  | 11 | 120256337 | C | T | 0.311  | 0.7559 | + | 0     | 0     | 0 | 1       |
| rs61905086  | 11 | 116614863 | C | T | -0.311 | 0.7561 | + | -25.1 | 2.398 | 1 | 0.1215  |
| rs3897570   | 11 | 120395229 | C | A | 0.31   | 0.7562 | + | 0     | 0     | 0 | 1       |
| rs61900873  | 11 | 120395252 | C | T | 0.31   | 0.7562 | + | 0     | 0     | 0 | 1       |
| rs35661813  | 11 | 119831794 | C | A | -0.31  | 0.7563 | - | 0     | 0     | 0 | 1       |
| rs2096834   | 11 | 119269557 | T | C | -0.31  | 0.7564 | - | 0     | 0     | 0 | 1       |
| rs17121264  | 11 | 117690543 | C | A | 0.31   | 0.7567 | + | 0     | 0     | 0 | 1       |
| rs17581874  | 11 | 116929384 | C | A | -0.31  | 0.7567 | - | 0     | 0     | 0 | 1       |
| rs11600672  | 11 | 117564880 | A | G | 0.309  | 0.7572 | + | 0     | 0     | 0 | 1       |
| rs4597100   | 11 | 117686456 | A | C | 0.309  | 0.7572 | + | 0     | 0     | 0 | 1       |
| rs12271743  | 11 | 117026154 | C | T | -0.309 | 0.7574 | - | 0     | 0     | 0 | 1       |
| rs4938776   | 11 | 119956631 | C | A | -0.309 | 0.7574 | - | 0     | 0     | 0 | 1       |
| rs10790321  | 11 | 119470258 | A | G | -0.309 | 0.7575 | - | 0     | 0     | 0 | 1       |
| rs10790322  | 11 | 119470333 | A | G | -0.309 | 0.7575 | - | 0     | 0     | 0 | 1       |
| rs7950231   | 11 | 119470389 | G | A | -0.309 | 0.7575 | - | 0     | 0     | 0 | 1       |
| rs56196414  | 11 | 116541268 | A | G | 0.309  | 0.7576 | + | 0     | 0     | 0 | 1       |
| rs58208536  | 11 | 116540785 | C | G | 0.309  | 0.7576 | + | 0     | 0     | 0 | 1       |
| rs58346469  | 11 | 116540916 | T | C | 0.309  | 0.7576 | + | 0     | 0     | 0 | 1       |
| rs61906086  | 11 | 116539637 | G | A | 0.309  | 0.7576 | + | 0     | 0     | 0 | 1       |
| rs61906100  | 11 | 116541656 | A | C | 0.309  | 0.7576 | + | 0     | 0     | 0 | 1       |
| rs906820    | 11 | 119472385 | T | C | -0.309 | 0.7576 | - | 0     | 0     | 0 | 1       |
| rs61905472  | 11 | 117017706 | T | C | -0.308 | 0.7578 | - | 0     | 0     | 0 | 1       |
| rs4935752   | 11 | 120689119 | C | A | 0.308  | 0.7579 | + | 0     | 0     | 0 | 1       |
| rs57879605  | 11 | 118798757 | T | C | -0.308 | 0.7579 | + | 10.6  | 3.355 | 1 | 0.06702 |
| rs61905682  | 11 | 116837823 | C | G | -0.308 | 0.7579 | - | 0     | 0     | 0 | 1       |
| rs649233    | 11 | 117464063 | T | C | 0.308  | 0.758  | + | 0     | 0     | 0 | 1       |
| rs665758    | 11 | 119884319 | A | G | 0.308  | 0.758  | + | 0     | 0     | 0 | 1       |
| rs7934734   | 11 | 120542687 | G | A | 0.308  | 0.758  | + | 0     | 0     | 0 | 1       |
| rs10790315  | 11 | 119468951 | G | C | -0.308 | 0.7583 | - | 0     | 0     | 0 | 1       |
| rs10790316  | 11 | 119468994 | T | C | -0.308 | 0.7583 | - | 0     | 0     | 0 | 1       |
| rs4936378   | 11 | 117316321 | A | G | 0.308  | 0.7583 | + | 0     | 0     | 0 | 1       |
| rs7121550   | 11 | 119469211 | A | G | -0.308 | 0.7583 | - | 0     | 0     | 0 | 1       |
| rs10892311  | 11 | 118807735 | T | C | 0.307  | 0.7585 | + | 0     | 0.02  | 1 | 0.8862  |
| rs34160337  | 11 | 120393495 | G | T | 0.307  | 0.7587 | + | 0     | 0     | 0 | 1       |
| rs4252298   | 11 | 117854977 | C | T | 0.307  | 0.7588 | + | 0     | 0     | 0 | 1       |
| rs72999455  | 11 | 118483802 | G | A | 0.307  | 0.7588 | + | 0     | 0.036 | 1 | 0.8499  |
| rs649138    | 11 | 118066695 | C | T | 0.307  | 0.759  | + | 0     | 0     | 0 | 1       |
| rs12279593  | 11 | 117533949 | A | G | 0.307  | 0.7591 | + | 0     | 0     | 0 | 1       |
| rs17596129  | 11 | 117712849 | C | G | 0.307  | 0.7591 | + | 0     | 0     | 0 | 1       |
| rs180347    | 11 | 116612312 | C | G | -0.307 | 0.7592 | + | -11.1 | 2.701 | 1 | 0.1003  |
| rs7342270   | 11 | 119843952 | A | T | -0.307 | 0.7592 | - | 0     | 0     | 0 | 1       |
| rs11216513  | 11 | 117588733 | T | G | 0.306  | 0.7593 | + | 0     | 0     | 0 | 1       |
| rs10790366  | 11 | 119967769 | T | G | -0.306 | 0.7594 | - | 0     | 0     | 0 | 1       |
| rs59533604  | 11 | 117333229 | C | A | -0.306 | 0.7595 | - | 0     | 0     | 0 | 1       |
| rs1945765   | 11 | 118182829 | A | T | 0.306  | 0.7596 | + | 0     | 0     | 0 | 1       |
| rs676812    | 11 | 117926593 | A | G | -0.306 | 0.7597 | - | 0     | 0     | 0 | 1       |
| rs11600274  | 11 | 120477398 | A | G | 0.305  | 0.7601 | + | 0     | 0     | 0 | 1       |
| rs4938391   | 11 | 117358351 | A | C | -0.305 | 0.7604 | - | 0     | 0     | 0 | 1       |
| rs73011197  | 11 | 116487300 | T | C | 0.305  | 0.7604 | + | 0     | 0     | 0 | 1       |
| rs7478744   | 11 | 120946580 | A | G | -0.304 | 0.7609 | - | 0     | 0     | 0 | 1       |

|             |    |           |   |   |        |        |     |        |       |   |        |
|-------------|----|-----------|---|---|--------|--------|-----|--------|-------|---|--------|
| rs17570295  | 11 | 116426814 | A | T | -0.304 | 0.7612 | -?  | 0      | 0     | 0 | 1      |
| rs75896504  | 11 | 117784946 | A | G | -0.304 | 0.7612 | -?  | 0      | 0     | 0 | 1      |
| rs598061    | 11 | 117985080 | C | A | -0.304 | 0.7613 | --  | 0      | 0.014 | 1 | 0.9068 |
| rs183901166 | 11 | 119896824 | A | G | 0.304  | 0.7614 | +?  | 0      | 0     | 0 | 1      |
| rs11217712  | 11 | 120030227 | G | T | 0.303  | 0.7617 | +?  | 0      | 0     | 0 | 1      |
| rs12808958  | 11 | 116229759 | A | G | -0.303 | 0.7618 | +-- | -175.9 | 1.087 | 1 | 0.2971 |
| rs73003773  | 11 | 120720298 | C | T | 0.303  | 0.7618 | +?  | 0      | 0     | 0 | 1      |
| rs117883320 | 11 | 119789992 | A | C | 0.303  | 0.7619 | +?  | 0      | 0     | 0 | 1      |
| rs74621718  | 11 | 117590895 | G | C | 0.303  | 0.7619 | +?  | 0      | 0     | 0 | 1      |
| rs78667446  | 11 | 117590919 | T | G | 0.303  | 0.7619 | +?  | 0      | 0     | 0 | 1      |
| rs71478238  | 11 | 116231844 | G | T | -0.303 | 0.762  | +-- | -168   | 1.12  | 1 | 0.29   |
| rs1168815   | 11 | 119018023 | C | T | 0.303  | 0.7621 | +?  | 0      | 0     | 0 | 1      |
| rs7112967   | 11 | 116831912 | T | C | 0.303  | 0.7622 | +?  | 0      | 0     | 0 | 1      |
| rs112571425 | 11 | 117620050 | C | T | 0.302  | 0.7624 | +?  | 0      | 0     | 0 | 1      |
| rs55871712  | 11 | 117333521 | T | C | -0.302 | 0.7624 | -?  | 0      | 0     | 0 | 1      |
| rs180345    | 11 | 116613017 | A | G | -0.302 | 0.7625 | -+  | -11.4  | 2.692 | 1 | 0.1008 |
| rs573827    | 11 | 117214091 | A | G | 0.302  | 0.7626 | +?  | 0      | 0     | 0 | 1      |
| rs11216674  | 11 | 117880139 | T | C | 0.302  | 0.7628 | +?  | 0      | 0     | 0 | 1      |
| rs59620302  | 11 | 116581159 | G | C | -0.302 | 0.7628 | --  | 0      | 0.032 | 1 | 0.8588 |
| rs188849771 | 11 | 119263574 | G | A | -0.302 | 0.7629 | -?  | 0      | 0     | 0 | 1      |
| rs6589764   | 11 | 119476676 | C | T | -0.302 | 0.7629 | -?  | 0      | 0     | 0 | 1      |
| rs236919    | 11 | 117095361 | T | C | 0.301  | 0.7631 | +?  | 0      | 0     | 0 | 1      |
| rs7102059   | 11 | 121185726 | T | A | -0.301 | 0.7633 | -?  | 0      | 0     | 0 | 1      |
| rs7121851   | 11 | 117757875 | T | C | -0.301 | 0.7634 | -?  | 0      | 0     | 0 | 1      |
| rs7940175   | 11 | 117334349 | T | C | -0.301 | 0.7635 | -?  | 0      | 0     | 0 | 1      |
| rs2846106   | 11 | 120601873 | G | A | 0.301  | 0.7636 | +?  | 0      | 0     | 0 | 1      |
| rs140140760 | 11 | 116312961 | A | G | -0.301 | 0.7637 | -?  | 0      | 0     | 0 | 1      |
| rs35778099  | 11 | 119831582 | T | C | -0.3   | 0.7639 | -?  | 0      | 0     | 0 | 1      |
| rs61905474  | 11 | 117019530 | A | G | -0.3   | 0.764  | -?  | 0      | 0     | 0 | 1      |
| rs61905475  | 11 | 117024435 | G | A | -0.3   | 0.764  | -?  | 0      | 0     | 0 | 1      |
| rs61905477  | 11 | 117026055 | G | A | -0.3   | 0.764  | -?  | 0      | 0     | 0 | 1      |
| rs6589784   | 11 | 119844270 | C | A | -0.3   | 0.764  | -?  | 0      | 0     | 0 | 1      |
| rs17122278  | 11 | 118449370 | G | A | 0.3    | 0.7641 | +-- | 0      | 0.228 | 1 | 0.633  |
| rs7122401   | 11 | 120183803 | A | G | -0.3   | 0.7641 | -?  | 0      | 0     | 0 | 1      |
| rs80068772  | 11 | 116546161 | T | A | 0.3    | 0.7642 | +?  | 0      | 0     | 0 | 1      |
| rs9163      | 11 | 117283808 | T | C | 0.3    | 0.7643 | +?  | 0      | 0     | 0 | 1      |
| rs7114739   | 11 | 119455165 | C | T | 0.3    | 0.7645 | +?  | 0      | 0     | 0 | 1      |
| rs1605853   | 11 | 119418040 | C | T | 0.299  | 0.7646 | +?  | 0      | 0     | 0 | 1      |
| rs497043    | 11 | 117123297 | G | C | 0.299  | 0.7648 | +?  | 0      | 0     | 0 | 1      |
| rs10892667  | 11 | 120936907 | C | T | -0.299 | 0.7649 | -?  | 0      | 0     | 0 | 1      |
| rs2508654   | 11 | 120405520 | T | C | 0.299  | 0.7652 | +?  | 0      | 0     | 0 | 1      |
| rs4252299   | 11 | 117855922 | T | G | 0.299  | 0.7652 | +?  | 0      | 0     | 0 | 1      |
| rs78502545  | 11 | 118615390 | T | C | -0.299 | 0.7653 | -+  | -44.5  | 2.075 | 1 | 0.1497 |
| rs1287395   | 11 | 120085692 | C | G | 0.298  | 0.7654 | +?  | 0      | 0     | 0 | 1      |
| rs59232710  | 11 | 116504984 | G | A | 0.298  | 0.7654 | +?  | 0      | 0     | 0 | 1      |
| rs74533222  | 11 | 121074895 | C | T | -0.298 | 0.7654 | -?  | 0      | 0     | 0 | 1      |
| rs117840927 | 11 | 121065324 | A | C | -0.298 | 0.7658 | -?  | 0      | 0     | 0 | 1      |
| rs10892176  | 11 | 117685037 | C | T | 0.298  | 0.766  | +?  | 0      | 0     | 0 | 1      |
| rs7110240   | 11 | 116343848 | C | T | -0.298 | 0.766  | -?  | 0      | 0     | 0 | 1      |
| rs7951593   | 11 | 119840442 | T | C | -0.298 | 0.766  | -?  | 0      | 0     | 0 | 1      |
| rs4938486   | 11 | 117992645 | G | A | -0.297 | 0.7663 | --  | 0      | 0.014 | 1 | 0.9061 |
| rs3894250   | 11 | 117312609 | C | A | -0.297 | 0.7667 | -?  | 0      | 0     | 0 | 1      |
| rs56313145  | 11 | 119973302 | A | G | -0.297 | 0.7667 | -?  | 0      | 0     | 0 | 1      |
| rs61905518  | 11 | 117040739 | G | A | -0.297 | 0.7667 | -?  | 0      | 0     | 0 | 1      |
| rs665218    | 11 | 117425003 | A | G | -0.297 | 0.7667 | -?  | 0      | 0     | 0 | 1      |
| rs2048246   | 11 | 119598653 | C | T | -0.297 | 0.7668 | -?  | 0      | 0     | 0 | 1      |

|              |    |           |   |   |        |        |    |        |       |   |         |
|--------------|----|-----------|---|---|--------|--------|----|--------|-------|---|---------|
| rs11216898   | 11 | 118432852 | C | T | 0.296  | 0.7669 | ++ | 0      | 0.007 | 1 | 0.9322  |
| rs190638475  | 11 | 121068352 | A | G | 0.296  | 0.767  | +? | 0      | 0     | 0 | 1       |
| rs113204414  | 11 | 117603352 | C | T | 0.296  | 0.7671 | +? | 0      | 0     | 0 | 1       |
| rs4938386    | 11 | 117334518 | T | C | -0.296 | 0.7671 | -? | 0      | 0     | 0 | 1       |
| rs116993355  | 11 | 119012962 | C | T | 0.296  | 0.7672 | +? | 0      | 0     | 0 | 1       |
| rs12420302   | 11 | 119299592 | G | A | -0.296 | 0.7672 | -? | 0      | 0     | 0 | 1       |
| rs144015791  | 11 | 116805874 | T | G | 0.296  | 0.7672 | +? | 0      | 0     | 0 | 1       |
| rs4936389    | 11 | 117488717 | T | C | 0.296  | 0.7672 | +? | 0      | 0     | 0 | 1       |
| rs77646493   | 11 | 116582180 | A | C | -0.296 | 0.7673 | -- | 0      | 0.033 | 1 | 0.8562  |
| rs10892355   | 11 | 119240809 | C | T | 0.296  | 0.7674 | +? | 0      | 0     | 0 | 1       |
| rs74360954   | 11 | 116582542 | T | C | -0.296 | 0.7674 | -- | 0      | 0.033 | 1 | 0.8562  |
| rs113749676  | 11 | 116712442 | T | C | -0.295 | 0.7678 | +- | 26.8   | 4.101 | 1 | 0.04287 |
| rs11601616   | 11 | 119451615 | C | T | 0.295  | 0.7678 | +? | 0      | 0     | 0 | 1       |
| rs1243255182 | 11 | 119891625 | G | A | 0.295  | 0.7678 | +? | 0      | 0     | 0 | 1       |
| rs35720648   | 11 | 119269112 | C | G | -0.295 | 0.7678 | -? | 0      | 0     | 0 | 1       |
| rs61906085   | 11 | 116539090 | G | A | 0.295  | 0.7678 | +? | 0      | 0     | 0 | 1       |
| rs671872     | 11 | 119016176 | G | A | 0.295  | 0.7678 | +? | 0      | 0     | 0 | 1       |
| rs1941636    | 11 | 117993422 | C | T | -0.295 | 0.7681 | -- | 0      | 0.003 | 1 | 0.9567  |
| rs616262     | 11 | 119851604 | G | C | 0.295  | 0.7681 | +? | 0      | 0     | 0 | 1       |
| rs10892245   | 11 | 118472354 | A | C | 0.295  | 0.7682 | +- | 0      | 0.294 | 1 | 0.5874  |
| rs45515495   | 11 | 116665025 | A | T | -0.295 | 0.7683 | +- | -192.4 | 1.026 | 1 | 0.3111  |
| rs10891965   | 11 | 116209581 | A | G | 0.294  | 0.7688 | +? | 0      | 0     | 0 | 1       |
| rs1941627    | 11 | 117989246 | G | A | -0.294 | 0.769  | -- | 0      | 0.006 | 1 | 0.9389  |
| rs77526581   | 11 | 119884520 | T | C | 0.294  | 0.769  | +? | 0      | 0     | 0 | 1       |
| rs12808254   | 11 | 118066912 | T | C | -0.294 | 0.7691 | +- | 31.6   | 4.388 | 1 | 0.03618 |
| rs3741278    | 11 | 117352949 | A | G | -0.294 | 0.7691 | -? | 0      | 0     | 0 | 1       |
| rs10750114   | 11 | 117692170 | G | T | 0.293  | 0.7693 | +? | 0      | 0     | 0 | 1       |
| rs3138091    | 11 | 119291480 | G | A | -0.293 | 0.7693 | -? | 0      | 0     | 0 | 1       |
| rs58990403   | 11 | 116509339 | G | A | -0.293 | 0.7693 | -? | 0      | 0     | 0 | 1       |
| rs10892722   | 11 | 121194387 | A | G | -0.293 | 0.7694 | -? | 0      | 0     | 0 | 1       |
| rs12807216   | 11 | 119300681 | A | C | -0.293 | 0.7694 | -? | 0      | 0     | 0 | 1       |
| rs3138092    | 11 | 119291445 | C | T | -0.293 | 0.7694 | -? | 0      | 0     | 0 | 1       |
| rs11217325   | 11 | 119444474 | G | A | -0.293 | 0.7695 | -? | 0      | 0     | 0 | 1       |
| rs7115154    | 11 | 119840776 | A | G | -0.293 | 0.7696 | -? | 0      | 0     | 0 | 1       |
| rs10790317   | 11 | 119469009 | A | G | -0.293 | 0.7697 | -? | 0      | 0     | 0 | 1       |
| rs548381     | 11 | 117171337 | T | C | -0.293 | 0.7697 | -? | 0      | 0     | 0 | 1       |
| rs3895896    | 11 | 119961536 | A | T | -0.293 | 0.7698 | -? | 0      | 0     | 0 | 1       |
| rs56339619   | 11 | 120021546 | A | G | 0.293  | 0.7699 | +? | 0      | 0     | 0 | 1       |
| rs12365133   | 11 | 119620456 | G | A | -0.292 | 0.77   | -? | 0      | 0     | 0 | 1       |
| rs11217272   | 11 | 119279939 | G | A | 0.292  | 0.7702 | +? | 0      | 0     | 0 | 1       |
| rs662799     | 11 | 116663707 | G | A | -0.292 | 0.7702 | +- | -53.5  | 1.954 | 1 | 0.1621  |
| rs547124     | 11 | 120052554 | A | G | 0.292  | 0.7703 | +? | 0      | 0     | 0 | 1       |
| rs61898268   | 11 | 120073236 | C | A | 0.292  | 0.7703 | +? | 0      | 0     | 0 | 1       |
| rs117028190  | 11 | 117336093 | T | C | -0.292 | 0.7705 | -? | 0      | 0     | 0 | 1       |
| rs12274192   | 11 | 116652351 | G | A | -0.291 | 0.7707 | +- | -52    | 1.974 | 1 | 0.1601  |
| rs12417611   | 11 | 119299832 | A | G | -0.291 | 0.7707 | -? | 0      | 0     | 0 | 1       |
| rs78296522   | 11 | 116648776 | A | C | 0.291  | 0.7707 | +- | 0      | 0.079 | 1 | 0.7792  |
| rs12417523   | 11 | 119299408 | T | C | -0.291 | 0.7708 | -? | 0      | 0     | 0 | 1       |
| rs4385905    | 11 | 120394576 | A | T | 0.291  | 0.7709 | +? | 0      | 0     | 0 | 1       |
| rs61900871   | 11 | 120394410 | T | C | 0.291  | 0.7709 | +? | 0      | 0     | 0 | 1       |
| rs144425764  | 11 | 117710295 | C | T | -0.291 | 0.771  | -? | 0      | 0     | 0 | 1       |
| rs11217430   | 11 | 119595209 | A | G | 0.291  | 0.7712 | +? | 0      | 0     | 0 | 1       |
| rs45485302   | 11 | 118405377 | A | C | 0.29   | 0.7715 | ++ | 0      | 0     | 1 | 0.9882  |
| rs73588403   | 11 | 116628271 | T | C | -0.29  | 0.7716 | +- | 3.2    | 3.099 | 1 | 0.07833 |
| rs2444241    | 11 | 120083312 | G | A | 0.29   | 0.7717 | +? | 0      | 0     | 0 | 1       |
| rs2444243    | 11 | 120082325 | A | G | 0.29   | 0.7717 | +? | 0      | 0     | 0 | 1       |

|             |    |           |   |   |        |        |   |        |       |   |         |
|-------------|----|-----------|---|---|--------|--------|---|--------|-------|---|---------|
| rs2508495   | 11 | 120082748 | C | T | 0.29   | 0.7717 | + | 0      | 0     | 0 | 1       |
| rs2508496   | 11 | 120083078 | C | T | 0.29   | 0.7717 | + | 0      | 0     | 0 | 1       |
| rs547990    | 11 | 120083271 | C | A | 0.29   | 0.7717 | + | 0      | 0     | 0 | 1       |
| rs1001205   | 11 | 119292712 | T | C | -0.29  | 0.7719 | - | 0      | 0     | 0 | 1       |
| rs76376430  | 11 | 116464209 | T | C | -0.289 | 0.7722 | - | 0      | 0     | 0 | 1       |
| rs4544037   | 11 | 118222062 | C | T | -0.289 | 0.7724 | + | 0      | 0.786 | 1 | 0.3752  |
| rs45621436  | 11 | 118483912 | G | T | -0.289 | 0.7724 | + | 0      | 0.123 | 1 | 0.7259  |
| rs12575067  | 11 | 119065310 | A | G | -0.289 | 0.7729 | - | 0      | 0     | 0 | 1       |
| rs3138097   | 11 | 119285008 | C | T | -0.288 | 0.773  | - | 0      | 0     | 0 | 1       |
| rs11216668  | 11 | 117878559 | C | T | 0.288  | 0.7731 | + | 0      | 0     | 0 | 1       |
| rs11216669  | 11 | 117878578 | T | C | 0.288  | 0.7731 | + | 0      | 0     | 0 | 1       |
| rs11216670  | 11 | 117878659 | A | T | 0.288  | 0.7731 | + | 0      | 0     | 0 | 1       |
| rs4938390   | 11 | 117358313 | T | C | -0.288 | 0.7734 | - | 0      | 0     | 0 | 1       |
| rs886022    | 11 | 116583513 | A | C | 0.288  | 0.7734 | + | -174.9 | 1.091 | 1 | 0.2962  |
| rs11607388  | 11 | 116305597 | A | G | -0.288 | 0.7735 | - | 0      | 0     | 0 | 1       |
| rs12417207  | 11 | 119469425 | A | C | -0.288 | 0.7735 | - | 0      | 0     | 0 | 1       |
| rs76801336  | 11 | 116504754 | C | T | 0.288  | 0.7735 | + | 0      | 0     | 0 | 1       |
| rs116658831 | 11 | 118970476 | A | G | 0.288  | 0.7736 | + | 0      | 0     | 0 | 1       |
| rs2663625   | 11 | 119422334 | C | T | 0.288  | 0.7736 | + | 0      | 0     | 0 | 1       |
| rs17121519  | 11 | 117886453 | T | C | 0.287  | 0.7738 | + | 0      | 0     | 0 | 1       |
| rs628299    | 11 | 118018022 | G | A | -0.287 | 0.7739 | + | 0      | 0.668 | 1 | 0.4137  |
| rs2298766   | 11 | 117332343 | T | C | -0.287 | 0.774  | - | 0      | 0     | 0 | 1       |
| rs11216040  | 11 | 116488539 | A | G | -0.287 | 0.7741 | - | 0      | 0     | 0 | 1       |
| rs12576975  | 11 | 117590007 | A | C | 0.287  | 0.7741 | + | 0      | 0     | 0 | 1       |
| rs78080911  | 11 | 117590811 | G | A | 0.287  | 0.7741 | + | 0      | 0     | 0 | 1       |
| rs7108613   | 11 | 118268613 | G | A | 0.287  | 0.7743 | + | 0      | 0.137 | 1 | 0.7116  |
| rs61906105  | 11 | 116550528 | G | A | 0.287  | 0.7744 | + | 0      | 0     | 0 | 1       |
| rs12293402  | 11 | 119445971 | T | C | -0.286 | 0.7746 | - | 0      | 0     | 0 | 1       |
| rs3741324   | 11 | 118405835 | A | G | 0.286  | 0.7746 | + | 0      | 0     | 1 | 0.9871  |
| rs61898748  | 11 | 119445417 | T | C | -0.286 | 0.7746 | - | 0      | 0     | 0 | 1       |
| rs77574778  | 11 | 116581800 | T | C | -0.286 | 0.7747 | - | 0      | 0.035 | 1 | 0.8519  |
| rs7949751   | 11 | 118072373 | G | A | 0.286  | 0.7748 | + | 0      | 0     | 0 | 1       |
| rs34003087  | 11 | 116663596 | T | C | -0.286 | 0.775  | - | 0      | 0.106 | 1 | 0.7443  |
| rs142693807 | 11 | 116904176 | A | G | -0.286 | 0.7752 | + | 47.4   | 5.702 | 1 | 0.01695 |
| rs1144035   | 11 | 116584317 | C | T | 0.285  | 0.7754 | + | -148.4 | 1.208 | 1 | 0.2718  |
| rs78470936  | 11 | 117500323 | G | T | 0.285  | 0.7754 | + | 0      | 0     | 0 | 1       |
| rs59827403  | 11 | 117296923 | G | C | -0.285 | 0.7758 | - | 0      | 0     | 0 | 1       |
| rs884603    | 11 | 116421659 | T | C | 0.285  | 0.7759 | + | 0      | 0.315 | 1 | 0.5744  |
| rs78615799  | 11 | 117400284 | T | C | 0.285  | 0.776  | + | 0      | 0     | 0 | 1       |
| rs2847495   | 11 | 120135501 | A | C | -0.284 | 0.7761 | - | 0      | 0     | 0 | 1       |
| rs10892017  | 11 | 116567881 | C | G | 0.284  | 0.7762 | + | 0      | 0     | 0 | 1       |
| rs7127212   | 11 | 118953202 | T | C | -0.284 | 0.7762 | - | 0      | 0     | 0 | 1       |
| rs75210049  | 11 | 116987964 | A | G | -0.284 | 0.7762 | - | 0      | 0     | 0 | 1       |
| rs7938944   | 11 | 118954066 | C | T | -0.284 | 0.7762 | - | 0      | 0     | 0 | 1       |
| rs7952700   | 11 | 118954194 | C | G | -0.284 | 0.7762 | - | 0      | 0     | 0 | 1       |
| rs4301800   | 11 | 119019520 | A | C | 0.284  | 0.7763 | + | 0      | 0     | 0 | 1       |
| rs646371    | 11 | 121004172 | A | G | -0.284 | 0.7763 | - | 0      | 0     | 0 | 1       |
| rs77309894  | 11 | 119890651 | A | T | 0.284  | 0.7765 | + | 0      | 0     | 0 | 1       |
| rs11606575  | 11 | 117237207 | G | C | -0.284 | 0.7767 | - | 0      | 0     | 0 | 1       |
| rs143668212 | 11 | 117061197 | T | C | -0.283 | 0.7769 | - | 0      | 0     | 0 | 1       |
| rs77086432  | 11 | 117046136 | C | T | -0.283 | 0.7769 | - | 0      | 0     | 0 | 1       |
| rs61900461  | 11 | 119972006 | A | G | 0.283  | 0.777  | + | 0      | 0     | 0 | 1       |
| rs7107910   | 11 | 117733559 | C | G | 0.283  | 0.7775 | + | 0      | 0     | 0 | 1       |
| rs530291    | 11 | 119989569 | T | C | 0.282  | 0.7776 | + | 0      | 0     | 0 | 1       |
| rs73009180  | 11 | 116417492 | T | C | -0.282 | 0.7777 | - | 0      | 0     | 0 | 1       |
| rs1054735   | 11 | 119290034 | G | C | -0.282 | 0.7778 | - | 0      | 0     | 0 | 1       |

|              |    |           |   |   |        |        |    |       |       |   |         |
|--------------|----|-----------|---|---|--------|--------|----|-------|-------|---|---------|
| rs56133216   | 11 | 119257248 | C | T | -0.282 | 0.7779 | -? | 0     | 0     | 0 | 1       |
| rs612132     | 11 | 119014474 | T | A | 0.282  | 0.7779 | +? | 0     | 0     | 0 | 1       |
| rs10790381   | 11 | 120257495 | G | A | 0.282  | 0.778  | +? | 0     | 0     | 0 | 1       |
| rs3824977    | 11 | 120745967 | G | A | -0.282 | 0.778  | -? | 0     | 0     | 0 | 1       |
| rs61905460   | 11 | 116989524 | T | C | -0.281 | 0.7784 | -? | 0     | 0     | 0 | 1       |
| rs78825663   | 11 | 117307055 | G | C | -0.281 | 0.7785 | -? | 0     | 0     | 0 | 1       |
| rs12420850   | 11 | 120073966 | A | C | 0.281  | 0.7786 | +? | 0     | 0     | 0 | 1       |
| rs614944     | 11 | 116717663 | C | T | -0.281 | 0.7786 | +? | -15.6 | 2.596 | 1 | 0.1071  |
| rs117040938  | 11 | 119950717 | C | T | 0.281  | 0.7787 | +? | 0     | 0     | 0 | 1       |
| rs7102666    | 11 | 117589939 | C | G | 0.281  | 0.7787 | +? | 0     | 0     | 0 | 1       |
| rs74792494   | 11 | 116549408 | C | A | 0.281  | 0.7787 | +? | 0     | 0     | 0 | 1       |
| rs140393706  | 11 | 117269842 | T | C | 0.281  | 0.7788 | +? | 0     | 0     | 0 | 1       |
| rs499910     | 11 | 116763034 | G | A | -0.281 | 0.7788 | -? | 0     | 0     | 0 | 1       |
| rs12420888   | 11 | 116563822 | G | C | 0.281  | 0.7789 | +? | 0     | 0     | 0 | 1       |
| rs484988     | 11 | 117266648 | C | G | -0.28  | 0.7793 | -? | 0     | 0     | 0 | 1       |
| rs4936552    | 11 | 120688502 | T | A | 0.28   | 0.7793 | +? | 0     | 0     | 0 | 1       |
| rs11216904   | 11 | 118440863 | G | A | 0.28   | 0.7794 | +? | 0     | 0.04  | 1 | 0.8408  |
| rs470645     | 11 | 120007889 | T | G | -0.28  | 0.7794 | -? | 0     | 0     | 0 | 1       |
| rs7129848    | 11 | 119566228 | T | C | 0.28   | 0.7796 | +? | 0     | 0     | 0 | 1       |
| rs2663635    | 11 | 119438415 | C | T | 0.28   | 0.7797 | +? | 0     | 0     | 0 | 1       |
| rs7934763    | 11 | 116792357 | G | T | 0.28   | 0.7797 | +? | 0     | 0     | 0 | 1       |
| rs12224844   | 11 | 118439048 | T | A | 0.28   | 0.7799 | +? | 0     | 0.038 | 1 | 0.8455  |
| rs77216358   | 11 | 120311157 | G | A | 0.279  | 0.7799 | +? | 0     | 0     | 0 | 1       |
| rs11605568   | 11 | 116568168 | A | G | 0.279  | 0.7801 | +? | 0     | 0     | 0 | 1       |
| rs56060233   | 11 | 116540310 | T | C | 0.279  | 0.7802 | +? | 0     | 0     | 0 | 1       |
| rs67294535   | 11 | 120451223 | G | A | -0.279 | 0.7802 | -? | 0     | 0     | 0 | 1       |
| rs11217279   | 11 | 119297711 | A | G | -0.279 | 0.7803 | -? | 0     | 0     | 0 | 1       |
| rs12421915   | 11 | 119326630 | T | C | -0.279 | 0.7803 | -? | 0     | 0     | 0 | 1       |
| rs28489214   | 11 | 118993899 | G | A | 0.279  | 0.7803 | +? | 0     | 0     | 0 | 1       |
| rs629397     | 11 | 117440611 | C | G | -0.279 | 0.7803 | -? | 0     | 0     | 0 | 1       |
| rs7119828    | 11 | 119297614 | G | A | -0.279 | 0.7803 | -? | 0     | 0     | 0 | 1       |
| rs12276576   | 11 | 117672973 | G | C | 0.279  | 0.7804 | ++ | 0     | 0     | 1 | 0.9824  |
| rs140026975  | 11 | 118594669 | C | A | -0.279 | 0.7804 | -? | 0     | 0     | 0 | 1       |
| rs74724948   | 11 | 116544015 | T | A | 0.279  | 0.7804 | +? | 0     | 0     | 0 | 1       |
| rs140160504  | 11 | 119666456 | T | C | -0.279 | 0.7805 | -? | 0     | 0     | 0 | 1       |
| rs1053087454 | 11 | 117692121 | G | A | 0.279  | 0.7806 | +? | 0     | 0     | 0 | 1       |
| rs11216004   | 11 | 116426350 | T | C | 0.278  | 0.7807 | ++ | 0     | 0.124 | 1 | 0.725   |
| rs2305823    | 11 | 117306738 | C | A | 0.278  | 0.7807 | +? | 0     | 0     | 0 | 1       |
| rs10891989   | 11 | 116430203 | C | A | 0.278  | 0.7809 | ++ | 0     | 0.058 | 1 | 0.8095  |
| rs7930491    | 11 | 116427932 | A | G | 0.278  | 0.7809 | ++ | 0     | 0.007 | 1 | 0.9351  |
| rs61907605   | 11 | 116820071 | A | T | 0.278  | 0.781  | +? | 0     | 0     | 0 | 1       |
| rs35381826   | 11 | 118032438 | T | G | -0.278 | 0.7812 | -+ | 0     | 0.063 | 1 | 0.8019  |
| rs61900870   | 11 | 120394319 | G | A | 0.278  | 0.7813 | +? | 0     | 0     | 0 | 1       |
| rs61903430   | 11 | 116987342 | C | G | -0.277 | 0.7814 | -? | 0     | 0     | 0 | 1       |
| rs7106437    | 11 | 116992076 | T | C | -0.277 | 0.7814 | -? | 0     | 0     | 0 | 1       |
| rs7120515    | 11 | 116991926 | A | G | -0.277 | 0.7814 | -? | 0     | 0     | 0 | 1       |
| rs73587457   | 11 | 117647461 | G | C | -0.278 | 0.7814 | +? | 0.8   | 3.025 | 1 | 0.08201 |
| rs10790294   | 11 | 119305126 | T | C | -0.277 | 0.7815 | -? | 0     | 0     | 0 | 1       |
| rs57088249   | 11 | 119299371 | A | G | -0.277 | 0.7815 | -? | 0     | 0     | 0 | 1       |
| rs948776     | 11 | 117586623 | C | A | 0.277  | 0.7815 | +? | 0     | 0     | 0 | 1       |
| rs4450179    | 11 | 119309945 | C | T | -0.277 | 0.7818 | -? | 0     | 0     | 0 | 1       |
| rs111462461  | 11 | 117604866 | T | C | 0.277  | 0.7821 | +? | 0     | 0     | 0 | 1       |
| rs7943309    | 11 | 116773653 | A | G | -0.277 | 0.7821 | -? | 0     | 0     | 0 | 1       |
| rs508205     | 11 | 120057343 | G | A | -0.276 | 0.7822 | +? | 0     | 0.352 | 1 | 0.5529  |
| rs10160467   | 11 | 119968483 | C | G | 0.276  | 0.7824 | +? | 0     | 0     | 0 | 1       |
| rs11602570   | 11 | 117350098 | A | G | 0.276  | 0.7824 | +? | 0     | 0     | 0 | 1       |

|              |    |           |   |   |        |        |    |       |       |   |         |
|--------------|----|-----------|---|---|--------|--------|----|-------|-------|---|---------|
| rs138184472  | 11 | 120486825 | C | A | -0.276 | 0.7826 | -? | 0     | 0     | 0 | 1       |
| rs45505501   | 11 | 118405305 | A | G | 0.276  | 0.7827 | ++ | 0     | 0     | 1 | 0.998   |
| rs11215990   | 11 | 116407583 | T | C | 0.276  | 0.7828 | +? | 0     | 0     | 0 | 1       |
| rs12807097   | 11 | 120242348 | A | G | 0.276  | 0.7828 | +? | 0     | 0     | 0 | 1       |
| rs7927993    | 11 | 116383211 | C | T | -0.276 | 0.7828 | -? | 0     | 0     | 0 | 1       |
| rs2000571    | 11 | 116585533 | A | G | -0.276 | 0.7829 | -? | 0     | 0     | 0 | 1       |
| rs579239     | 11 | 117425009 | C | T | -0.276 | 0.7829 | -? | 0     | 0     | 0 | 1       |
| rs7927379    | 11 | 117577925 | A | G | 0.276  | 0.7829 | +? | 0     | 0     | 0 | 1       |
| rs636518     | 11 | 119846820 | G | A | -0.275 | 0.783  | -? | 0     | 0     | 0 | 1       |
| rs11217634   | 11 | 119887151 | T | C | 0.275  | 0.7831 | +? | 0     | 0     | 0 | 1       |
| rs12272524   | 11 | 119888797 | T | C | 0.275  | 0.7831 | +? | 0     | 0     | 0 | 1       |
| rs1551238    | 11 | 119948132 | C | A | -0.275 | 0.7831 | -? | 0     | 0     | 0 | 1       |
| rs12295901   | 11 | 116347396 | A | G | 0.275  | 0.7832 | +? | 0     | 0     | 0 | 1       |
| rs180328     | 11 | 116623026 | G | A | -0.275 | 0.7832 | -+ | -13.9 | 2.633 | 1 | 0.1046  |
| rs595412     | 11 | 119015932 | T | C | 0.275  | 0.7832 | +? | 0     | 0     | 0 | 1       |
| rs10892419   | 11 | 119472574 | A | G | -0.275 | 0.7835 | -? | 0     | 0     | 0 | 1       |
| rs602594     | 11 | 118040610 | T | C | 0.275  | 0.7835 | +- | 0     | 0.282 | 1 | 0.5951  |
| rs6589775    | 11 | 119656448 | C | T | 0.275  | 0.7837 | +? | 0     | 0     | 0 | 1       |
| rs1379735938 | 11 | 116988040 | T | A | -0.274 | 0.784  | -? | 0     | 0     | 0 | 1       |
| rs142661080  | 11 | 117852972 | T | C | -0.274 | 0.784  | -? | 0     | 0     | 0 | 1       |
| rs80092204   | 11 | 116987988 | C | T | -0.274 | 0.784  | -? | 0     | 0     | 0 | 1       |
| rs1287393    | 11 | 120095872 | T | A | 0.274  | 0.7841 | +? | 0     | 0     | 0 | 1       |
| rs1429049972 | 11 | 116552062 | T | A | 0.274  | 0.7841 | +? | 0     | 0     | 0 | 1       |
| rs4936559    | 11 | 120705063 | C | T | 0.274  | 0.7841 | +? | 0     | 0     | 0 | 1       |
| rs7952043    | 11 | 116552562 | T | C | 0.274  | 0.7841 | +? | 0     | 0     | 0 | 1       |
| rs10892664   | 11 | 120911771 | A | T | -0.274 | 0.7842 | -? | 0     | 0     | 0 | 1       |
| rs61743159   | 11 | 117335686 | A | G | -0.274 | 0.7842 | -? | 0     | 0     | 0 | 1       |
| rs17122269   | 11 | 118445275 | C | T | 0.274  | 0.7843 | +- | 0     | 0.274 | 1 | 0.6006  |
| rs12417550   | 11 | 119299377 | A | G | -0.273 | 0.7845 | -? | 0     | 0     | 0 | 1       |
| rs61898266   | 11 | 120070943 | A | G | -0.273 | 0.7846 | -? | 0     | 0     | 0 | 1       |
| rs2663639    | 11 | 119418419 | G | A | 0.273  | 0.7847 | +? | 0     | 0     | 0 | 1       |
| rs3133854    | 11 | 120603801 | G | A | -0.273 | 0.7847 | -? | 0     | 0     | 0 | 1       |
| rs75949389   | 11 | 116892626 | G | A | -0.273 | 0.7847 | +- | 47.7  | 5.736 | 1 | 0.01662 |
| rs11600901   | 11 | 118031986 | A | G | -0.273 | 0.7848 | -+ | 0     | 0.084 | 1 | 0.7716  |
| rs17475804   | 11 | 116236979 | G | C | 0.273  | 0.7851 | +? | 0     | 0     | 0 | 1       |
| rs12800691   | 11 | 120145180 | C | G | -0.273 | 0.7852 | -? | 0     | 0     | 0 | 1       |
| rs1786189    | 11 | 117946691 | T | C | -0.273 | 0.7852 | -? | 0     | 0     | 0 | 1       |
| rs12785772   | 11 | 116563608 | A | G | 0.272  | 0.7853 | +? | 0     | 0     | 0 | 1       |
| rs3741323    | 11 | 118405641 | G | A | 0.272  | 0.7853 | ++ | 0     | 0     | 1 | 0.992   |
| rs1508098    | 11 | 116338899 | G | A | 0.272  | 0.7854 | +? | 0     | 0     | 0 | 1       |
| rs35238955   | 11 | 120182578 | T | G | -0.272 | 0.7854 | -? | 0     | 0     | 0 | 1       |
| rs45474901   | 11 | 118405453 | C | T | 0.272  | 0.7856 | ++ | 0     | 0     | 1 | 0.996   |
| rs4938690    | 11 | 119468661 | G | A | -0.272 | 0.7856 | -? | 0     | 0     | 0 | 1       |
| rs595483     | 11 | 119895096 | G | A | 0.272  | 0.7856 | +? | 0     | 0     | 0 | 1       |
| rs4417279    | 11 | 120543781 | T | G | -0.272 | 0.7857 | -? | 0     | 0     | 0 | 1       |
| rs1551239    | 11 | 119947953 | A | G | -0.272 | 0.7858 | -? | 0     | 0     | 0 | 1       |
| rs61905519   | 11 | 117045555 | C | T | -0.272 | 0.7858 | -? | 0     | 0     | 0 | 1       |
| rs61905521   | 11 | 117049020 | A | G | -0.272 | 0.7858 | -? | 0     | 0     | 0 | 1       |
| rs61905522   | 11 | 117049025 | A | G | -0.272 | 0.7858 | -? | 0     | 0     | 0 | 1       |
| rs11218161   | 11 | 121015711 | T | C | -0.272 | 0.7859 | -? | 0     | 0     | 0 | 1       |
| rs1145223    | 11 | 117716453 | T | C | -0.272 | 0.7859 | -? | 0     | 0     | 0 | 1       |
| rs79175883   | 11 | 116777394 | C | T | -0.272 | 0.7859 | -? | 0     | 0     | 0 | 1       |
| rs1583058    | 11 | 119269952 | C | T | -0.272 | 0.786  | -? | 0     | 0     | 0 | 1       |
| rs12801144   | 11 | 117802113 | G | A | 0.271  | 0.7861 | +? | 0     | 0     | 0 | 1       |
| rs4451741    | 11 | 120577600 | T | G | -0.271 | 0.7861 | -? | 0     | 0     | 0 | 1       |
| rs9630201    | 11 | 120577240 | A | G | -0.271 | 0.7861 | -? | 0     | 0     | 0 | 1       |

|              |    |           |   |   |        |        |   |       |        |   |           |
|--------------|----|-----------|---|---|--------|--------|---|-------|--------|---|-----------|
| rs4316540    | 11 | 116819241 | T | C | 0.271  | 0.7862 | + | 0     | 0      | 0 | 1         |
| rs33929148   | 11 | 119243670 | T | C | 0.271  | 0.7864 | + | 0     | 0      | 0 | 1         |
| rs7483081    | 11 | 118276246 | C | T | 0.271  | 0.7864 | + | 0     | 0.14   | 1 | 0.7084    |
| rs755003     | 11 | 119439459 | A | G | 0.271  | 0.7864 | + | 0     | 0      | 0 | 1         |
| rs9666462    | 11 | 118275997 | A | G | 0.271  | 0.7864 | + | 0     | 0.14   | 1 | 0.7084    |
| rs7944738    | 11 | 117996119 | C | T | -0.271 | 0.7866 | - | 0     | 0.011  | 1 | 0.9161    |
| rs1169496015 | 11 | 116960059 | G | C | -0.271 | 0.7867 | - | 73.6  | 11.362 | 1 | 0.0007498 |
| rs11215954   | 11 | 116348066 | T | G | 0.27   | 0.7868 | + | 0     | 0      | 0 | 1         |
| rs1298336202 | 11 | 116640604 | T | C | 0.27   | 0.7868 | + | -73.9 | 1.725  | 1 | 0.189     |
| rs4938341    | 11 | 117002596 | A | G | 0.27   | 0.7869 | + | 0     | 0      | 0 | 1         |
| rs4609614    | 11 | 119448579 | A | C | -0.27  | 0.7871 | - | 0     | 0      | 0 | 1         |
| rs59405103   | 11 | 118262305 | C | A | 0.27   | 0.7871 | + | 0     | 0.164  | 1 | 0.6857    |
| rs141538185  | 11 | 117142625 | G | C | 0.27   | 0.7872 | + | 0     | 0      | 0 | 1         |
| rs6589772    | 11 | 119637061 | A | C | 0.27   | 0.7872 | + | 0     | 0      | 0 | 1         |
| rs71486349   | 11 | 120808303 | T | G | -0.27  | 0.7872 | - | 0     | 0      | 0 | 1         |
| rs77257523   | 11 | 119884846 | C | T | 0.27   | 0.7872 | + | 0     | 0      | 0 | 1         |
| rs77840919   | 11 | 119884816 | G | C | 0.27   | 0.7872 | + | 0     | 0      | 0 | 1         |
| rs12280724   | 11 | 116613423 | T | G | -0.27  | 0.7873 | + | -21.4 | 2.471  | 1 | 0.116     |
| rs118155116  | 11 | 117035228 | C | T | -0.27  | 0.7874 | - | 0     | 0      | 0 | 1         |
| rs12576758   | 11 | 120898232 | T | C | -0.27  | 0.7875 | - | 0     | 0      | 0 | 1         |
| rs68097814   | 11 | 120898482 | G | A | -0.27  | 0.7875 | - | 0     | 0      | 0 | 1         |
| rs4938731    | 11 | 119689932 | A | G | -0.269 | 0.7876 | - | 0     | 0      | 0 | 1         |
| rs637463     | 11 | 119886078 | A | T | 0.269  | 0.7876 | + | 0     | 0      | 0 | 1         |
| rs7129877    | 11 | 119412428 | G | C | 0.269  | 0.7876 | + | 0     | 0      | 0 | 1         |
| rs111234707  | 11 | 117912538 | A | G | -0.269 | 0.7877 | - | 0     | 0      | 0 | 1         |
| rs17121259   | 11 | 117686567 | G | C | 0.269  | 0.7877 | + | 0     | 0      | 0 | 1         |
| rs572608     | 11 | 118801640 | A | T | 0.269  | 0.7881 | + | 0     | 0      | 1 | 0.9932    |
| rs10892243   | 11 | 118441846 | C | T | 0.269  | 0.7882 | + | 0     | 0.042  | 1 | 0.8367    |
| rs1599809    | 11 | 118179200 | A | G | 0.269  | 0.7883 | + | 0     | 0      | 0 | 1         |
| rs12574090   | 11 | 116213060 | A | G | -0.268 | 0.7884 | - | 0     | 0      | 0 | 1         |
| rs117259599  | 11 | 119312818 | T | C | 0.268  | 0.7885 | + | 0     | 0      | 0 | 1         |
| rs11217495   | 11 | 119648938 | G | A | 0.268  | 0.7886 | + | 0     | 0      | 0 | 1         |
| rs1129013    | 11 | 118989098 | C | G | 0.268  | 0.7886 | + | 0     | 0      | 0 | 1         |
| rs61900868   | 11 | 120393597 | C | T | 0.268  | 0.7886 | + | 0     | 0      | 0 | 1         |
| rs113337722  | 11 | 118464665 | G | A | -0.268 | 0.7888 | - | 0     | 0.003  | 1 | 0.9549    |
| rs11604100   | 11 | 121096865 | T | C | -0.268 | 0.7888 | - | 0     | 0      | 0 | 1         |
| rs470392     | 11 | 119994421 | T | C | -0.268 | 0.7888 | - | 0     | 0      | 0 | 1         |
| rs584670     | 11 | 117927759 | A | G | -0.268 | 0.7889 | - | 0     | 0      | 0 | 1         |
| rs61904859   | 11 | 116492506 | T | C | -0.268 | 0.7889 | - | 0     | 0      | 0 | 1         |
| rs76924546   | 11 | 119885012 | A | G | 0.268  | 0.7889 | + | 0     | 0      | 0 | 1         |
| rs11217801   | 11 | 120165942 | G | A | -0.267 | 0.7891 | - | 0     | 0      | 0 | 1         |
| rs75310100   | 11 | 116578361 | T | G | -0.267 | 0.7892 | - | 0     | 0      | 0 | 1         |
| rs3759012    | 11 | 118901262 | T | C | 0.267  | 0.7893 | + | 0     | 0      | 0 | 1         |
| rs73598666   | 11 | 117591480 | T | G | 0.267  | 0.7894 | + | 0     | 0      | 0 | 1         |
| rs78354899   | 11 | 120398577 | T | C | 0.267  | 0.7894 | + | 0     | 0      | 0 | 1         |
| rs17567197   | 11 | 116247944 | C | A | 0.267  | 0.7895 | + | 0     | 0      | 0 | 1         |
| rs76380380   | 11 | 117171475 | G | C | -0.267 | 0.7897 | - | 0     | 0      | 0 | 1         |
| rs10892119   | 11 | 117331499 | A | G | -0.267 | 0.7898 | - | 0     | 0      | 0 | 1         |
| rs111656195  | 11 | 118301375 | A | G | 0.267  | 0.7898 | + | 11.4  | 3.385  | 1 | 0.06579   |
| rs1244409804 | 11 | 116587146 | A | G | -0.267 | 0.7898 | - | 0     | 0.039  | 1 | 0.843     |
| rs2510852    | 11 | 117377390 | C | G | -0.267 | 0.7898 | - | 0     | 0      | 0 | 1         |
| rs11218155   | 11 | 121006345 | A | T | 0.266  | 0.7899 | + | 0     | 0      | 0 | 1         |
| rs11826147   | 11 | 117613813 | C | G | 0.266  | 0.7899 | + | 0     | 0      | 0 | 1         |
| rs12790073   | 11 | 117747277 | T | C | -0.266 | 0.7901 | - | 0     | 0      | 0 | 1         |
| rs881122     | 11 | 117972936 | A | C | -0.266 | 0.7901 | - | 0     | 0.123  | 1 | 0.7257    |
| rs535207     | 11 | 118408033 | G | A | 0.266  | 0.7904 | + | 0     | 0.003  | 1 | 0.9557    |

|              |    |           |   |   |        |        |    |       |        |   |          |
|--------------|----|-----------|---|---|--------|--------|----|-------|--------|---|----------|
| rs9666463    | 11 | 118276116 | G | C | 0.266  | 0.7904 | +- | 0     | 0.138  | 1 | 0.7106   |
| rs1530604    | 11 | 119719420 | G | A | -0.266 | 0.7906 | -? | 0     | 0      | 0 | 1        |
| rs34527172   | 11 | 120394929 | C | T | 0.265  | 0.7907 | +- | 0     | 0      | 0 | 1        |
| rs35187805   | 11 | 120394910 | T | C | 0.265  | 0.7907 | +- | 0     | 0      | 0 | 1        |
| rs71484175   | 11 | 120394599 | A | G | 0.265  | 0.7907 | +- | 0     | 0      | 0 | 1        |
| rs58283940   | 11 | 116238557 | A | G | 0.265  | 0.791  | +- | 0     | 0      | 0 | 1        |
| rs2508665    | 11 | 117198789 | T | A | 0.265  | 0.7911 | +- | 0     | 0      | 0 | 1        |
| rs12805985   | 11 | 117802309 | G | A | 0.265  | 0.7912 | +- | 0     | 0      | 0 | 1        |
| rs117518542  | 11 | 116937146 | A | G | -0.264 | 0.7914 | -+ | 70.7  | 10.252 | 1 | 0.001365 |
| rs142661919  | 11 | 116937127 | G | A | -0.264 | 0.7914 | -+ | 70.7  | 10.252 | 1 | 0.001365 |
| rs11218122   | 11 | 120899458 | T | C | -0.264 | 0.7915 | -? | 0     | 0      | 0 | 1        |
| rs2845654    | 11 | 119437438 | C | A | 0.264  | 0.7915 | +- | 0     | 0      | 0 | 1        |
| rs4472969    | 11 | 117700323 | A | G | 0.264  | 0.7915 | +- | 0     | 0      | 0 | 1        |
| rs1258164206 | 11 | 117211240 | T | G | 0.264  | 0.7916 | +- | 0     | 0      | 0 | 1        |
| rs111903103  | 11 | 118308499 | T | C | 0.264  | 0.7917 | -+ | 13.9  | 3.483  | 1 | 0.062    |
| rs180369     | 11 | 116593058 | T | A | -0.264 | 0.7917 | -+ | -13.9 | 2.634  | 1 | 0.1046   |
| rs4938355    | 11 | 117053675 | G | A | 0.264  | 0.7918 | +- | 0     | 0      | 0 | 1        |
| rs111940587  | 11 | 117561070 | G | A | 0.264  | 0.7919 | +- | 0     | 0      | 0 | 1        |
| rs2097183    | 11 | 118091067 | T | C | -0.264 | 0.792  | -+ | 0     | 0.473  | 1 | 0.4918   |
| rs4936370    | 11 | 117193369 | T | G | 0.264  | 0.792  | +- | 0     | 0      | 0 | 1        |
| rs1006195    | 11 | 118958869 | T | G | -0.263 | 0.7922 | -? | 0     | 0      | 0 | 1        |
| rs74691084   | 11 | 116893790 | A | G | 0.263  | 0.7923 | +- | 0     | 0      | 0 | 1        |
| rs493678     | 11 | 120831520 | T | C | 0.263  | 0.7924 | +- | 0     | 0      | 0 | 1        |
| rs11218128   | 11 | 120926467 | A | T | -0.263 | 0.7926 | -? | 0     | 0      | 0 | 1        |
| rs511939     | 11 | 120813715 | G | C | -0.263 | 0.7926 | -? | 0     | 0      | 0 | 1        |
| rs67932968   | 11 | 120932457 | A | G | -0.263 | 0.7926 | -? | 0     | 0      | 0 | 1        |
| rs1784459    | 11 | 118938388 | A | C | 0.263  | 0.7927 | +- | 0     | 0      | 0 | 1        |
| rs1784460    | 11 | 118938371 | A | T | 0.263  | 0.7927 | +- | 0     | 0      | 0 | 1        |
| rs1786684    | 11 | 118938435 | A | G | 0.263  | 0.7927 | +- | 0     | 0      | 0 | 1        |
| rs77623050   | 11 | 116496948 | T | C | 0.263  | 0.7927 | +- | 0     | 0      | 0 | 1        |
| rs78485217   | 11 | 116496961 | A | T | 0.263  | 0.7927 | +- | 0     | 0      | 0 | 1        |
| rs12365864   | 11 | 116489036 | G | A | -0.262 | 0.7931 | -? | 0     | 0      | 0 | 1        |
| rs493693     | 11 | 116247759 | A | C | -0.262 | 0.7931 | -? | 0     | 0      | 0 | 1        |
| rs4938326    | 11 | 116905464 | C | G | 0.262  | 0.7931 | +- | 0     | 0      | 0 | 1        |
| rs2096883    | 11 | 120137544 | T | C | -0.262 | 0.7933 | -? | 0     | 0      | 0 | 1        |
| rs11216822   | 11 | 118091375 | A | G | -0.262 | 0.7935 | -+ | 0     | 0.477  | 1 | 0.4896   |
| rs11216096   | 11 | 116562580 | A | C | 0.262  | 0.7936 | +- | 0     | 0      | 0 | 1        |
| rs542987     | 11 | 116484093 | G | A | 0.262  | 0.7936 | +- | 0     | 0      | 0 | 1        |
| rs7929757    | 11 | 117612002 | C | T | 0.262  | 0.7936 | +- | 0     | 0      | 0 | 1        |
| rs10466589   | 11 | 116611985 | A | G | -0.262 | 0.7937 | +- | -20.7 | 2.486  | 1 | 0.1149   |
| rs56183153   | 11 | 119260456 | A | C | -0.262 | 0.7937 | -? | 0     | 0      | 0 | 1        |
| rs12226297   | 11 | 121185128 | A | G | -0.261 | 0.7938 | -? | 0     | 0      | 0 | 1        |
| rs2282494    | 11 | 117866868 | G | A | 0.261  | 0.7938 | +- | 0     | 0      | 0 | 1        |
| rs11825181   | 11 | 116626258 | A | G | -0.261 | 0.794  | +- | -24   | 2.42   | 1 | 0.1198   |
| rs653278     | 11 | 119899963 | T | A | 0.261  | 0.794  | +- | 0     | 0      | 0 | 1        |
| rs76260364   | 11 | 119884922 | T | C | 0.261  | 0.7942 | +- | 0     | 0      | 0 | 1        |
| rs12802321   | 11 | 119308804 | A | G | -0.261 | 0.7943 | -? | 0     | 0      | 0 | 1        |
| rs675866     | 11 | 118991019 | C | A | 0.261  | 0.7943 | +- | 0     | 0      | 0 | 1        |
| rs11216609   | 11 | 117769364 | C | T | -0.26  | 0.7946 | -? | 0     | 0      | 0 | 1        |
| rs600325     | 11 | 118041133 | C | T | 0.26   | 0.7947 | +- | 0     | 0.274  | 1 | 0.6009   |
| rs11218092   | 11 | 120857051 | A | G | -0.26  | 0.7948 | -+ | 0     | 0.271  | 1 | 0.6029   |
| rs191364497  | 11 | 120893217 | T | C | 0.26   | 0.7948 | +- | 0     | 0      | 0 | 1        |
| rs668033     | 11 | 119023107 | C | A | 0.26   | 0.7949 | +- | 0     | 0      | 0 | 1        |
| rs2853009    | 11 | 118148146 | G | A | -0.26  | 0.795  | -? | 0     | 0      | 0 | 1        |
| rs4938342    | 11 | 117003420 | G | C | 0.26   | 0.7951 | +- | 0     | 0      | 0 | 1        |
| rs57641217   | 11 | 116632956 | T | C | -0.26  | 0.7951 | +- | 5.3   | 3.168  | 1 | 0.07511  |

|             |    |           |   |   |        |        |    |       |       |   |         |
|-------------|----|-----------|---|---|--------|--------|----|-------|-------|---|---------|
| rs76492199  | 11 | 117622274 | A | G | -0.26  | 0.7951 | +- | 22    | 3.845 | 1 | 0.04989 |
| rs504935    | 11 | 117446945 | C | T | 0.26   | 0.7952 | +- | 0     | 0     | 0 | 1       |
| rs4938339   | 11 | 116980594 | T | C | -0.259 | 0.7957 | -? | 0     | 0     | 0 | 1       |
| rs1078762   | 11 | 119438765 | T | C | 0.259  | 0.7959 | +- | 0     | 0     | 0 | 1       |
| rs11217281  | 11 | 119304053 | T | C | -0.258 | 0.7961 | -? | 0     | 0     | 0 | 1       |
| rs11820589  | 11 | 116633862 | A | G | -0.258 | 0.7961 | +- | -11.7 | 2.686 | 1 | 0.1012  |
| rs1901707   | 11 | 119984638 | T | C | -0.258 | 0.7961 | -? | 0     | 0     | 0 | 1       |
| rs76755469  | 11 | 121136144 | A | G | 0.258  | 0.7961 | +- | 0     | 0     | 0 | 1       |
| rs73594696  | 11 | 117561019 | C | T | 0.258  | 0.7962 | +- | 0     | 0     | 0 | 1       |
| rs78914290  | 11 | 119870442 | T | C | 0.258  | 0.7962 | +- | 0     | 0     | 0 | 1       |
| rs59590191  | 11 | 117774394 | G | A | 0.258  | 0.7963 | +- | 0     | 0     | 0 | 1       |
| rs7924856   | 11 | 120498051 | A | G | 0.258  | 0.7963 | +- | 0     | 0     | 0 | 1       |
| rs12792689  | 11 | 119259720 | G | A | -0.258 | 0.7964 | -? | 0     | 0     | 0 | 1       |
| rs676234    | 11 | 116722171 | G | A | -0.258 | 0.7964 | +- | -26.7 | 2.367 | 1 | 0.1239  |
| rs2228054   | 11 | 117864113 | A | G | 0.257  | 0.7969 | +- | 0     | 0     | 0 | 1       |
| rs73024372  | 11 | 117362820 | A | G | -0.257 | 0.7969 | -? | 0     | 0     | 0 | 1       |
| rs7930469   | 11 | 117585602 | C | T | 0.257  | 0.797  | +- | 0     | 0     | 0 | 1       |
| rs17121515  | 11 | 117882961 | A | G | 0.257  | 0.7971 | +- | 0     | 0     | 0 | 1       |
| rs7128587   | 11 | 118409302 | A | G | 0.257  | 0.7971 | ++ | 0     | 0.004 | 1 | 0.9483  |
| rs7131631   | 11 | 118409374 | A | G | 0.257  | 0.7971 | ++ | 0     | 0.004 | 1 | 0.9483  |
| rs73022041  | 11 | 118408789 | C | T | 0.257  | 0.7971 | ++ | 0     | 0.004 | 1 | 0.9483  |
| rs17123792  | 11 | 120166016 | A | G | -0.257 | 0.7973 | -? | 0     | 0     | 0 | 1       |
| rs10790343  | 11 | 119630480 | A | G | 0.257  | 0.7974 | +- | 0     | 0     | 0 | 1       |
| rs150081993 | 11 | 117337032 | T | C | -0.257 | 0.7975 | -? | 0     | 0     | 0 | 1       |
| rs583971    | 11 | 119899910 | A | G | 0.257  | 0.7975 | +- | 0     | 0     | 0 | 1       |
| rs77959607  | 11 | 119977373 | G | T | 0.257  | 0.7975 | +- | 0     | 0     | 0 | 1       |
| rs2305013   | 11 | 120340060 | T | A | 0.256  | 0.7977 | +- | 0     | 0     | 0 | 1       |
| rs10892194  | 11 | 117793239 | G | A | -0.256 | 0.7979 | -? | 0     | 0     | 0 | 1       |
| rs1305565   | 11 | 118990253 | C | T | 0.256  | 0.7979 | +- | 0     | 0     | 0 | 1       |
| rs5070      | 11 | 116708020 | A | G | 0.256  | 0.7979 | +- | 0     | 0     | 0 | 1       |
| rs71482132  | 11 | 118031211 | A | G | -0.256 | 0.798  | +- | 0     | 0.086 | 1 | 0.7697  |
| rs11217494  | 11 | 119648830 | C | T | 0.256  | 0.7982 | +- | 0     | 0     | 0 | 1       |
| rs61903817  | 11 | 117534453 | G | C | -0.256 | 0.7982 | -? | 0     | 0     | 0 | 1       |
| rs78867156  | 11 | 120405828 | A | G | 0.256  | 0.7983 | +- | 0     | 0     | 0 | 1       |
| rs78484485  | 11 | 116598065 | A | G | -0.255 | 0.7984 | +- | 0     | 0.199 | 1 | 0.6554  |
| rs3862602   | 11 | 119296520 | G | A | -0.255 | 0.7985 | -? | 0     | 0     | 0 | 1       |
| rs73022038  | 11 | 118408471 | T | C | 0.255  | 0.7985 | ++ | 0     | 0.004 | 1 | 0.9509  |
| rs74404016  | 11 | 118408653 | T | C | 0.255  | 0.7985 | ++ | 0     | 0.004 | 1 | 0.9509  |
| rs7925835   | 11 | 116985641 | G | T | -0.255 | 0.7985 | -? | 0     | 0     | 0 | 1       |
| rs7941258   | 11 | 117392940 | T | C | 0.255  | 0.7986 | +- | 0     | 0     | 0 | 1       |
| rs7941460   | 11 | 117392987 | A | G | 0.255  | 0.7986 | +- | 0     | 0     | 0 | 1       |
| rs7944704   | 11 | 117393345 | A | G | 0.255  | 0.7986 | +- | 0     | 0     | 0 | 1       |
| rs566935    | 11 | 120055477 | C | G | 0.255  | 0.7987 | +- | 0     | 0     | 0 | 1       |
| rs7936363   | 11 | 119881024 | T | G | 0.255  | 0.7987 | +- | 0     | 0     | 0 | 1       |
| rs17122157  | 11 | 118276492 | A | G | 0.255  | 0.7988 | +- | 0     | 0.133 | 1 | 0.7152  |
| rs12289673  | 11 | 117615003 | A | G | 0.255  | 0.7989 | +- | 0     | 0     | 0 | 1       |
| rs12289727  | 11 | 117615068 | A | G | 0.255  | 0.7989 | +- | 0     | 0     | 0 | 1       |
| rs12291096  | 11 | 117615371 | T | C | 0.255  | 0.7989 | +- | 0     | 0     | 0 | 1       |
| rs2000869   | 11 | 120544871 | G | A | 0.255  | 0.7989 | +- | 0     | 0     | 0 | 1       |
| rs7107757   | 11 | 116686288 | T | C | -0.255 | 0.799  | -? | 0     | 0     | 0 | 1       |
| rs477106    | 11 | 118363424 | A | C | 0.254  | 0.7992 | +- | 0     | 0.033 | 1 | 0.8563  |
| rs7110647   | 11 | 117245133 | T | C | -0.254 | 0.7992 | -? | 0     | 0     | 0 | 1       |
| rs117195665 | 11 | 117316640 | T | G | -0.254 | 0.7997 | -? | 0     | 0     | 0 | 1       |
| rs11218213  | 11 | 121101852 | G | A | -0.253 | 0.7999 | -? | 0     | 0     | 0 | 1       |
| rs11218120  | 11 | 120898761 | G | A | -0.253 | 0.8003 | -? | 0     | 0     | 0 | 1       |
| rs11218121  | 11 | 120898784 | C | T | -0.253 | 0.8003 | -? | 0     | 0     | 0 | 1       |

|             |    |           |   |   |        |        |    |        |        |   |          |
|-------------|----|-----------|---|---|--------|--------|----|--------|--------|---|----------|
| rs77953286  | 11 | 116914662 | C | G | -0.253 | 0.8004 | -+ | 72.3   | 10.835 | 1 | 0.000996 |
| rs11216886  | 11 | 118411424 | C | A | 0.253  | 0.8005 | ++ | 0      | 0.003  | 1 | 0.9545   |
| rs651348    | 11 | 117900997 | T | G | 0.253  | 0.8005 | +- | 0      | 0.355  | 1 | 0.5514   |
| rs642475    | 11 | 119899904 | C | T | 0.252  | 0.8009 | +? | 0      | 0      | 0 | 1        |
| rs61898292  | 11 | 120096056 | C | T | 0.252  | 0.801  | +? | 0      | 0      | 0 | 1        |
| rs1894006   | 11 | 119290369 | T | C | -0.252 | 0.8011 | -? | 0      | 0      | 0 | 1        |
| rs73022042  | 11 | 118408893 | A | G | 0.252  | 0.8011 | ++ | 0      | 0.005  | 1 | 0.946    |
| rs112120205 | 11 | 116899786 | A | G | 0.252  | 0.8012 | +? | 0      | 0      | 0 | 1        |
| rs609989    | 11 | 120814342 | A | G | -0.252 | 0.8012 | -? | 0      | 0      | 0 | 1        |
| rs61906103  | 11 | 116547004 | G | T | 0.252  | 0.8014 | +? | 0      | 0      | 0 | 1        |
| rs4938655   | 11 | 119306276 | A | C | -0.251 | 0.8015 | -? | 0      | 0      | 0 | 1        |
| rs61907563  | 11 | 116733565 | A | G | -0.251 | 0.8016 | -? | 0      | 0      | 0 | 1        |
| rs35407634  | 11 | 120553937 | T | G | 0.251  | 0.8018 | +? | 0      | 0      | 0 | 1        |
| rs61290697  | 11 | 118412358 | T | C | 0.251  | 0.802  | ++ | 0      | 0.002  | 1 | 0.9656   |
| rs11216487  | 11 | 117524497 | C | T | 0.25   | 0.8023 | -+ | -166.4 | 1.126  | 1 | 0.2886   |
| rs74443315  | 11 | 117583591 | G | A | 0.25   | 0.8023 | +? | 0      | 0      | 0 | 1        |
| rs59414734  | 11 | 116347944 | C | T | 0.25   | 0.8025 | +? | 0      | 0      | 0 | 1        |
| rs187236392 | 11 | 120074926 | G | A | 0.25   | 0.8027 | +? | 0      | 0      | 0 | 1        |
| rs7358294   | 11 | 119902521 | T | C | 0.25   | 0.8027 | +? | 0      | 0      | 0 | 1        |
| rs58768562  | 11 | 117896135 | T | C | 0.25   | 0.8028 | +? | 0      | 0      | 0 | 1        |
| rs73013729  | 11 | 117895163 | A | G | 0.25   | 0.8028 | +? | 0      | 0      | 0 | 1        |
| rs7942124   | 11 | 117895268 | T | A | 0.25   | 0.8028 | +? | 0      | 0      | 0 | 1        |
| rs7942146   | 11 | 117895305 | G | A | 0.25   | 0.8028 | +? | 0      | 0      | 0 | 1        |
| rs7942225   | 11 | 117895276 | T | C | 0.25   | 0.8028 | +? | 0      | 0      | 0 | 1        |
| rs7945541   | 11 | 117895712 | T | C | 0.25   | 0.8028 | +? | 0      | 0      | 0 | 1        |
| rs7945602   | 11 | 117895586 | A | G | 0.25   | 0.8028 | +? | 0      | 0      | 0 | 1        |
| rs115293580 | 11 | 120538317 | T | C | 0.249  | 0.8031 | +? | 0      | 0      | 0 | 1        |
| rs55734733  | 11 | 117894258 | A | C | 0.249  | 0.8031 | +? | 0      | 0      | 0 | 1        |
| rs55858401  | 11 | 117894371 | T | C | 0.249  | 0.8031 | +? | 0      | 0      | 0 | 1        |
| rs56029127  | 11 | 117894424 | A | G | 0.249  | 0.8031 | +? | 0      | 0      | 0 | 1        |
| rs60169792  | 11 | 117893889 | T | C | 0.249  | 0.8031 | +? | 0      | 0      | 0 | 1        |
| rs7121196   | 11 | 117729618 | A | G | -0.249 | 0.8033 | -? | 0      | 0      | 0 | 1        |
| rs4938517   | 11 | 118487673 | C | T | -0.249 | 0.8037 | -+ | 0      | 0.435  | 1 | 0.5098   |
| rs687560    | 11 | 121076285 | T | C | -0.248 | 0.8038 | -? | 0      | 0      | 0 | 1        |
| rs11216897  | 11 | 118432279 | G | A | 0.248  | 0.8039 | +- | 0      | 0.036  | 1 | 0.8495   |
| rs4245196   | 11 | 119472474 | G | A | -0.248 | 0.8039 | -? | 0      | 0      | 0 | 1        |
| rs1786141   | 11 | 118938315 | T | C | 0.248  | 0.804  | +? | 0      | 0      | 0 | 1        |
| rs59108310  | 11 | 118433729 | G | A | 0.248  | 0.804  | +- | 0      | 0.063  | 1 | 0.8017   |
| rs532815    | 11 | 116718858 | G | A | -0.248 | 0.8041 | -? | 0      | 0      | 0 | 1        |
| rs10790240  | 11 | 118009279 | G | T | -0.248 | 0.8043 | -+ | 0      | 0.024  | 1 | 0.8764   |
| rs202125027 | 11 | 119448580 | A | T | -0.248 | 0.8044 | -? | 0      | 0      | 0 | 1        |
| rs12274595  | 11 | 117692842 | C | T | 0.247  | 0.8046 | +? | 0      | 0      | 0 | 1        |
| rs11216926  | 11 | 118471996 | T | C | 0.247  | 0.8048 | +- | 0      | 0.209  | 1 | 0.6475   |
| rs4938802   | 11 | 120228989 | G | A | 0.247  | 0.8048 | +? | 0      | 0      | 0 | 1        |
| rs614825    | 11 | 118018725 | G | A | 0.247  | 0.8048 | ++ | 0      | 0.046  | 1 | 0.8294   |
| rs61355898  | 11 | 120578133 | T | C | -0.247 | 0.8049 | -? | 0      | 0      | 0 | 1        |
| rs948773    | 11 | 117586942 | A | G | 0.247  | 0.8049 | +? | 0      | 0      | 0 | 1        |
| rs948774    | 11 | 117586881 | A | T | 0.247  | 0.8049 | +? | 0      | 0      | 0 | 1        |
| rs10892452  | 11 | 119630385 | T | C | 0.247  | 0.805  | +? | 0      | 0      | 0 | 1        |
| rs4938654   | 11 | 119306183 | T | C | -0.247 | 0.805  | -? | 0      | 0      | 0 | 1        |
| rs12286604  | 11 | 118084728 | A | G | -0.247 | 0.8051 | -+ | 0      | 0.13   | 1 | 0.7181   |
| rs4625480   | 11 | 119831744 | G | A | 0.247  | 0.8051 | +? | 0      | 0      | 0 | 1        |
| rs7116106   | 11 | 120556018 | T | G | -0.247 | 0.8052 | -? | 0      | 0      | 0 | 1        |
| rs57461652  | 11 | 118146197 | A | C | -0.246 | 0.8053 | -? | 0      | 0      | 0 | 1        |
| rs580714    | 11 | 117423538 | C | A | -0.246 | 0.8053 | -? | 0      | 0      | 0 | 1        |
| rs75813208  | 11 | 117330944 | T | C | 0.246  | 0.8054 | +? | 0      | 0      | 0 | 1        |

|            |    |           |   |   |        |        |    |        |        |   |         |
|------------|----|-----------|---|---|--------|--------|----|--------|--------|---|---------|
| rs12804415 | 11 | 116232487 | G | A | -0.246 | 0.8055 | +- | -152.2 | 1.189  | 1 | 0.2755  |
| rs652449   | 11 | 119891597 | G | T | 0.246  | 0.8055 | +- | 0      | 0      | 0 | 1       |
| rs4938729  | 11 | 119687318 | C | T | -0.246 | 0.8057 | -? | 0      | 0      | 0 | 1       |
| rs12285127 | 11 | 119900754 | A | G | 0.246  | 0.8059 | +- | 0      | 0      | 0 | 1       |
| rs4576856  | 11 | 117622809 | G | T | 0.246  | 0.8059 | +- | 5.2    | 3.166  | 1 | 0.0752  |
| rs11216883 | 11 | 118410468 | G | A | 0.246  | 0.806  | ++ | 0      | 0.002  | 1 | 0.9643  |
| rs11216884 | 11 | 118410488 | C | T | 0.246  | 0.806  | ++ | 0      | 0.002  | 1 | 0.9643  |
| rs11216885 | 11 | 118410545 | G | A | 0.246  | 0.806  | ++ | 0      | 0.002  | 1 | 0.9643  |
| rs66461646 | 11 | 119319811 | C | T | -0.246 | 0.806  | -? | 0      | 0      | 0 | 1       |
| rs7943039  | 11 | 118603030 | A | G | -0.246 | 0.806  | -+ | 0      | 0.467  | 1 | 0.4946  |
| rs77341747 | 11 | 116964066 | T | C | -0.245 | 0.8061 | -+ | 76.3   | 12.678 | 1 | 0.00037 |
| rs77366224 | 11 | 116964065 | T | G | -0.245 | 0.8061 | -+ | 76.3   | 12.678 | 1 | 0.00037 |
| rs2063176  | 11 | 116428507 | G | C | 0.245  | 0.8062 | ++ | 0      | 0.009  | 1 | 0.9236  |
| rs7124100  | 11 | 118290169 | A | G | 0.245  | 0.8062 | +- | 0      | 0.253  | 1 | 0.6148  |
| rs1665777  | 11 | 119703771 | C | A | -0.245 | 0.8064 | -? | 0      | 0      | 0 | 1       |
| rs76972960 | 11 | 116916678 | C | T | 0.245  | 0.8064 | +- | 0      | 0      | 0 | 1       |
| rs1786685  | 11 | 118938957 | A | G | 0.245  | 0.8067 | +- | 0      | 0      | 0 | 1       |
| rs3212264  | 11 | 118216234 | A | C | -0.245 | 0.8067 | -+ | 0      | 0.788  | 1 | 0.3747  |
| rs45529532 | 11 | 118269674 | G | A | -0.245 | 0.8067 | -? | 0      | 0      | 0 | 1       |
| rs77252250 | 11 | 117591311 | A | C | 0.245  | 0.8067 | +- | 0      | 0      | 0 | 1       |
| rs12269936 | 11 | 119274417 | G | A | -0.244 | 0.807  | -? | 0      | 0      | 0 | 1       |
| rs4409838  | 11 | 119509911 | A | G | 0.244  | 0.807  | +- | 0      | 0      | 0 | 1       |
| rs471403   | 11 | 120816277 | A | G | -0.244 | 0.807  | -? | 0      | 0      | 0 | 1       |
| rs542903   | 11 | 119692663 | T | C | 0.244  | 0.807  | +- | 0      | 0      | 0 | 1       |
| rs57702967 | 11 | 118261736 | A | C | 0.244  | 0.8071 | +- | 0      | 0.203  | 1 | 0.6527  |
| rs11216523 | 11 | 117615875 | A | G | 0.244  | 0.8073 | +- | 0      | 0      | 0 | 1       |
| rs11216524 | 11 | 117615877 | C | G | 0.244  | 0.8073 | +- | 0      | 0      | 0 | 1       |
| rs12421359 | 11 | 119277583 | G | A | -0.244 | 0.8073 | -? | 0      | 0      | 0 | 1       |
| rs3133525  | 11 | 120671999 | A | G | 0.243  | 0.808  | +- | 0      | 0      | 0 | 1       |
| rs6589855  | 11 | 120954769 | C | T | -0.243 | 0.8081 | -? | 0      | 0      | 0 | 1       |
| rs17122021 | 11 | 118145686 | T | C | -0.243 | 0.8083 | -? | 0      | 0      | 0 | 1       |
| rs4245179  | 11 | 118144445 | G | A | -0.243 | 0.8083 | -? | 0      | 0      | 0 | 1       |
| rs4245180  | 11 | 118144512 | A | G | -0.243 | 0.8083 | -? | 0      | 0      | 0 | 1       |
| rs4938493  | 11 | 118144804 | G | T | -0.243 | 0.8083 | -? | 0      | 0      | 0 | 1       |
| rs57506367 | 11 | 118141993 | C | T | -0.243 | 0.8083 | -? | 0      | 0      | 0 | 1       |
| rs58254953 | 11 | 119472670 | A | G | -0.243 | 0.8083 | -? | 0      | 0      | 0 | 1       |
| rs607888   | 11 | 119887019 | A | G | 0.243  | 0.8083 | +- | 0      | 0      | 0 | 1       |
| rs7940047  | 11 | 118142619 | T | C | -0.243 | 0.8083 | -? | 0      | 0      | 0 | 1       |
| rs489059   | 11 | 119987517 | A | G | 0.242  | 0.8084 | +- | 0      | 0      | 0 | 1       |
| rs2048247  | 11 | 119476351 | A | G | -0.242 | 0.8086 | -? | 0      | 0      | 0 | 1       |
| rs2048248  | 11 | 119476354 | A | G | -0.242 | 0.8086 | -? | 0      | 0      | 0 | 1       |
| rs79410922 | 11 | 121101046 | G | T | -0.242 | 0.8087 | -? | 0      | 0      | 0 | 1       |
| rs35514679 | 11 | 119319701 | A | C | -0.242 | 0.8088 | -? | 0      | 0      | 0 | 1       |
| rs1789661  | 11 | 120827021 | T | C | -0.242 | 0.8089 | -+ | 0      | 0.26   | 1 | 0.6103  |
| rs1787024  | 11 | 119845535 | C | T | -0.242 | 0.809  | -? | 0      | 0      | 0 | 1       |
| rs10892458 | 11 | 119649488 | T | C | 0.242  | 0.8091 | +- | 0      | 0      | 0 | 1       |
| rs61903429 | 11 | 116986684 | A | C | -0.242 | 0.8091 | -? | 0      | 0      | 0 | 1       |
| rs7944427  | 11 | 117305461 | T | C | 0.241  | 0.8092 | +- | 0      | 0      | 0 | 1       |
| rs9804547  | 11 | 121086444 | A | T | -0.241 | 0.8092 | -? | 0      | 0      | 0 | 1       |
| rs2845653  | 11 | 119437815 | G | A | 0.241  | 0.8093 | +- | 0      | 0      | 0 | 1       |
| rs10458939 | 11 | 117898851 | A | G | 0.241  | 0.8095 | +- | 0      | 0      | 0 | 1       |
| rs11216682 | 11 | 117888564 | T | C | 0.241  | 0.8095 | +- | 0      | 0      | 0 | 1       |
| rs11216683 | 11 | 117888681 | G | A | 0.241  | 0.8095 | +- | 0      | 0      | 0 | 1       |
| rs11216685 | 11 | 117888746 | T | C | 0.241  | 0.8095 | +- | 0      | 0      | 0 | 1       |
| rs11216687 | 11 | 117889895 | A | G | 0.241  | 0.8095 | +- | 0      | 0      | 0 | 1       |
| rs11216688 | 11 | 117889922 | A | G | 0.241  | 0.8095 | +- | 0      | 0      | 0 | 1       |

|             |    |           |   |   |        |        |    |   |       |   |        |
|-------------|----|-----------|---|---|--------|--------|----|---|-------|---|--------|
| rs11216689  | 11 | 117889959 | A | C | 0.241  | 0.8095 | +  | 0 | 0     | 0 | 1      |
| rs11216690  | 11 | 117890167 | T | C | 0.241  | 0.8095 | +  | 0 | 0     | 0 | 1      |
| rs11216691  | 11 | 117890221 | G | A | 0.241  | 0.8095 | +  | 0 | 0     | 0 | 1      |
| rs11216692  | 11 | 117890295 | T | A | 0.241  | 0.8095 | +  | 0 | 0     | 0 | 1      |
| rs11216693  | 11 | 117890386 | A | C | 0.241  | 0.8095 | +  | 0 | 0     | 0 | 1      |
| rs11216694  | 11 | 117890391 | A | G | 0.241  | 0.8095 | +  | 0 | 0     | 0 | 1      |
| rs11216695  | 11 | 117890417 | A | G | 0.241  | 0.8095 | +  | 0 | 0     | 0 | 1      |
| rs11216696  | 11 | 117892322 | G | A | 0.241  | 0.8095 | +  | 0 | 0     | 0 | 1      |
| rs150204107 | 11 | 120401377 | A | G | -0.241 | 0.8095 | -  | 0 | 0     | 0 | 1      |
| rs17121524  | 11 | 117886623 | G | A | 0.241  | 0.8095 | +  | 0 | 0     | 0 | 1      |
| rs17121528  | 11 | 117889740 | T | C | 0.241  | 0.8095 | +  | 0 | 0     | 0 | 1      |
| rs4630330   | 11 | 117890857 | T | G | 0.241  | 0.8095 | +  | 0 | 0     | 0 | 1      |
| rs56118320  | 11 | 117886931 | A | C | 0.241  | 0.8095 | +  | 0 | 0     | 0 | 1      |
| rs57916935  | 11 | 117890874 | G | A | 0.241  | 0.8095 | +  | 0 | 0     | 0 | 1      |
| rs58496951  | 11 | 117890995 | C | A | 0.241  | 0.8095 | +  | 0 | 0     | 0 | 1      |
| rs58551444  | 11 | 117888418 | C | G | 0.241  | 0.8095 | +  | 0 | 0     | 0 | 1      |
| rs59198393  | 11 | 117890752 | T | C | 0.241  | 0.8095 | +  | 0 | 0     | 0 | 1      |
| rs59872579  | 11 | 117886753 | A | G | 0.241  | 0.8095 | +  | 0 | 0     | 0 | 1      |
| rs60590812  | 11 | 117892670 | C | G | 0.241  | 0.8095 | +  | 0 | 0     | 0 | 1      |
| rs61579653  | 11 | 117890989 | A | G | 0.241  | 0.8095 | +  | 0 | 0     | 0 | 1      |
| rs61598135  | 11 | 117888352 | A | T | 0.241  | 0.8095 | +  | 0 | 0     | 0 | 1      |
| rs73011704  | 11 | 117887084 | T | G | 0.241  | 0.8095 | +  | 0 | 0     | 0 | 1      |
| rs73011705  | 11 | 117887240 | A | G | 0.241  | 0.8095 | +  | 0 | 0     | 0 | 1      |
| rs73011710  | 11 | 117887667 | C | T | 0.241  | 0.8095 | +  | 0 | 0     | 0 | 1      |
| rs73011712  | 11 | 117887671 | C | T | 0.241  | 0.8095 | +  | 0 | 0     | 0 | 1      |
| rs73011721  | 11 | 117889569 | C | T | 0.241  | 0.8095 | +  | 0 | 0     | 0 | 1      |
| rs73011724  | 11 | 117889690 | A | T | 0.241  | 0.8095 | +  | 0 | 0     | 0 | 1      |
| rs73011757  | 11 | 117891787 | G | A | 0.241  | 0.8095 | +  | 0 | 0     | 0 | 1      |
| rs73013721  | 11 | 117893518 | T | G | 0.241  | 0.8095 | +  | 0 | 0     | 0 | 1      |
| rs7929175   | 11 | 117891489 | G | A | 0.241  | 0.8095 | +  | 0 | 0     | 0 | 1      |
| rs7944128   | 11 | 117891384 | C | T | 0.241  | 0.8095 | +  | 0 | 0     | 0 | 1      |
| rs7944374   | 11 | 117891582 | C | T | 0.241  | 0.8095 | +  | 0 | 0     | 0 | 1      |
| rs875025    | 11 | 116373451 | T | C | 0.241  | 0.8095 | +  | 0 | 0     | 0 | 1      |
| rs7927810   | 11 | 117991333 | A | G | -0.241 | 0.8096 | -- | 0 | 0.01  | 1 | 0.9185 |
| rs11217280  | 11 | 119304002 | G | A | -0.241 | 0.8097 | -  | 0 | 0     | 0 | 1      |
| rs12283157  | 11 | 119304238 | C | G | -0.241 | 0.8097 | -  | 0 | 0     | 0 | 1      |
| rs2511834   | 11 | 119197707 | A | G | -0.241 | 0.8097 | -  | 0 | 0     | 0 | 1      |
| rs74369487  | 11 | 117168340 | C | A | 0.241  | 0.8098 | +  | 0 | 0     | 0 | 1      |
| rs10892327  | 11 | 118939488 | G | C | 0.241  | 0.8099 | +  | 0 | 0     | 0 | 1      |
| rs949096    | 11 | 119839344 | A | G | -0.241 | 0.8099 | -  | 0 | 0     | 0 | 1      |
| rs11216676  | 11 | 117882394 | G | A | 0.24   | 0.8101 | +  | 0 | 0     | 0 | 1      |
| rs12226501  | 11 | 119831362 | G | T | 0.24   | 0.8101 | +  | 0 | 0     | 0 | 1      |
| rs57157718  | 11 | 117101445 | T | A | 0.24   | 0.8102 | +  | 0 | 0     | 0 | 1      |
| rs11216702  | 11 | 117894899 | A | T | 0.24   | 0.8103 | +  | 0 | 0     | 0 | 1      |
| rs2367970   | 11 | 116581641 | A | G | -0.24  | 0.8103 | -  | 0 | 0     | 0 | 1      |
| rs4322404   | 11 | 119420469 | C | T | 0.24   | 0.8103 | +  | 0 | 0     | 0 | 1      |
| rs61898859  | 11 | 119306752 | C | A | -0.24  | 0.8103 | -  | 0 | 0     | 0 | 1      |
| rs73013726  | 11 | 117894709 | A | G | 0.24   | 0.8103 | +  | 0 | 0     | 0 | 1      |
| rs11216902  | 11 | 118437279 | G | A | 0.24   | 0.8104 | +  | 0 | 0.063 | 1 | 0.8017 |
| rs490111    | 11 | 117426543 | G | A | 0.24   | 0.8105 | +  | 0 | 0     | 0 | 1      |
| rs480958    | 11 | 118577990 | G | A | 0.24   | 0.8106 | +  | 0 | 0.312 | 1 | 0.5765 |
| rs9326249   | 11 | 117318148 | A | G | -0.239 | 0.8108 | -  | 0 | 0     | 0 | 1      |
| rs4938370   | 11 | 117193350 | C | A | 0.239  | 0.8109 | +  | 0 | 0     | 0 | 1      |
| rs7931873   | 11 | 119821850 | G | A | 0.239  | 0.8109 | +  | 0 | 0     | 0 | 1      |
| rs78017165  | 11 | 121100855 | A | G | -0.239 | 0.811  | -  | 0 | 0     | 0 | 1      |
| rs1939668   | 11 | 120599866 | A | G | -0.239 | 0.8111 | -  | 0 | 0     | 0 | 1      |

|             |    |           |   |   |        |        |   |   |       |   |        |
|-------------|----|-----------|---|---|--------|--------|---|---|-------|---|--------|
| rs7941150   | 11 | 117091821 | A | G | 0.239  | 0.8113 | + | 0 | 0     | 0 | 1      |
| rs144785834 | 11 | 120095782 | C | A | 0.239  | 0.8114 | + | 0 | 0     | 0 | 1      |
| rs73613980  | 11 | 118284650 | T | C | 0.238  | 0.8115 | + | 0 | 0.142 | 1 | 0.706  |
| rs498872    | 11 | 118477367 | A | G | -0.238 | 0.8117 | - | 0 | 0.109 | 1 | 0.7415 |
| rs112590920 | 11 | 118143586 | A | G | -0.238 | 0.8118 | - | 0 | 0     | 0 | 1      |
| rs1262953   | 11 | 116579099 | A | G | 0.238  | 0.8118 | + | 0 | 0     | 0 | 1      |
| rs7940554   | 11 | 118142930 | T | C | -0.238 | 0.8118 | - | 0 | 0     | 0 | 1      |
| rs45600633  | 11 | 118460957 | A | G | -0.238 | 0.812  | - | 0 | 0     | 1 | 0.9844 |
| rs1784305   | 11 | 118942048 | A | G | 0.238  | 0.8121 | + | 0 | 0     | 0 | 1      |
| rs73005818  | 11 | 116239770 | A | G | 0.238  | 0.8121 | + | 0 | 0     | 0 | 1      |
| rs12802944  | 11 | 116576400 | C | T | -0.238 | 0.8122 | - | 0 | 0     | 0 | 1      |
| rs4439549   | 11 | 117780091 | A | C | 0.237  | 0.8123 | + | 0 | 0     | 0 | 1      |
| rs526397    | 11 | 120852324 | G | T | -0.237 | 0.8124 | + | 0 | 0.257 | 1 | 0.6121 |
| rs6589595   | 11 | 116981335 | A | G | -0.237 | 0.8125 | - | 0 | 0     | 0 | 1      |
| rs735007    | 11 | 119317018 | G | A | -0.237 | 0.8125 | - | 0 | 0     | 0 | 1      |
| rs10790376  | 11 | 120182932 | A | G | -0.237 | 0.8126 | - | 0 | 0     | 0 | 1      |
| rs10892561  | 11 | 120182869 | T | C | -0.237 | 0.8126 | - | 0 | 0     | 0 | 1      |
| rs17500548  | 11 | 117232391 | G | A | 0.237  | 0.8126 | + | 0 | 0     | 0 | 1      |
| rs33981325  | 11 | 121028666 | T | C | -0.237 | 0.8127 | - | 0 | 0     | 0 | 1      |
| rs7111567   | 11 | 119316659 | T | G | -0.237 | 0.8129 | - | 0 | 0     | 0 | 1      |
| rs4938742   | 11 | 119831351 | G | A | -0.236 | 0.8131 | - | 0 | 0     | 0 | 1      |
| rs595359    | 11 | 118992502 | T | G | 0.236  | 0.8132 | + | 0 | 0     | 0 | 1      |
| rs7117705   | 11 | 119492741 | C | T | -0.236 | 0.8132 | - | 0 | 0     | 0 | 1      |
| rs7103936   | 11 | 118091636 | C | A | -0.236 | 0.8134 | + | 0 | 0.464 | 1 | 0.4958 |
| rs2019655   | 11 | 117699878 | T | C | -0.236 | 0.8135 | - | 0 | 0     | 0 | 1      |
| rs10790179  | 11 | 117236319 | T | G | 0.236  | 0.8136 | + | 0 | 0     | 0 | 1      |
| rs10892097  | 11 | 117236060 | T | C | 0.236  | 0.8136 | + | 0 | 0     | 0 | 1      |
| rs4351828   | 11 | 119627450 | A | G | -0.236 | 0.8136 | - | 0 | 0     | 0 | 1      |
| rs3138093   | 11 | 119291403 | C | T | -0.236 | 0.8138 | - | 0 | 0     | 0 | 1      |
| rs56027537  | 11 | 119281397 | C | T | -0.236 | 0.8138 | - | 0 | 0     | 0 | 1      |
| rs891293    | 11 | 119302637 | A | G | -0.236 | 0.8138 | - | 0 | 0     | 0 | 1      |
| rs12417301  | 11 | 119284523 | A | T | -0.235 | 0.8139 | - | 0 | 0     | 0 | 1      |
| rs11216880  | 11 | 118409536 | A | G | 0.235  | 0.8142 | + | 0 | 0.016 | 1 | 0.9006 |
| rs7101585   | 11 | 118409583 | A | G | 0.235  | 0.8142 | + | 0 | 0.016 | 1 | 0.9006 |
| rs667670    | 11 | 119885822 | C | T | 0.235  | 0.8143 | + | 0 | 0     | 0 | 1      |
| rs11216067  | 11 | 116504377 | G | A | 0.235  | 0.8144 | + | 0 | 0     | 0 | 1      |
| rs17476159  | 11 | 116250523 | C | T | -0.235 | 0.8145 | - | 0 | 0     | 0 | 1      |
| rs2000873   | 11 | 120520218 | C | A | -0.234 | 0.8147 | - | 0 | 0     | 0 | 1      |
| rs56371319  | 11 | 117042967 | A | C | 0.234  | 0.8148 | + | 0 | 0     | 0 | 1      |
| rs58418986  | 11 | 120398613 | A | G | -0.234 | 0.8148 | - | 0 | 0     | 0 | 1      |
| rs684913    | 11 | 120819562 | T | C | -0.234 | 0.815  | - | 0 | 0     | 0 | 1      |
| rs1893391   | 11 | 119979732 | C | G | -0.234 | 0.8151 | - | 0 | 0     | 0 | 1      |
| rs2187639   | 11 | 117818041 | A | C | -0.234 | 0.8151 | + | 0 | 0.05  | 1 | 0.8234 |
| rs58162302  | 11 | 118146199 | T | A | -0.234 | 0.8151 | - | 0 | 0     | 0 | 1      |
| rs11608057  | 11 | 118030185 | T | C | -0.234 | 0.8152 | + | 0 | 0.115 | 1 | 0.735  |
| rs74996375  | 11 | 120008972 | A | C | -0.234 | 0.8152 | - | 0 | 0     | 0 | 1      |
| rs12792929  | 11 | 118240715 | C | G | -0.234 | 0.8153 | - | 0 | 0.011 | 1 | 0.9183 |
| rs4471466   | 11 | 116340960 | C | A | -0.234 | 0.8153 | - | 0 | 0     | 0 | 1      |
| rs624931    | 11 | 117922486 | C | T | -0.233 | 0.8154 | - | 0 | 0     | 0 | 1      |
| rs1614264   | 11 | 118942638 | C | A | 0.233  | 0.8155 | + | 0 | 0     | 0 | 1      |
| rs664320    | 11 | 119947402 | A | G | -0.233 | 0.8157 | - | 0 | 0     | 0 | 1      |
| rs150032046 | 11 | 120622042 | G | A | -0.233 | 0.8159 | - | 0 | 0     | 0 | 1      |
| rs598804    | 11 | 120851125 | T | C | -0.233 | 0.8161 | + | 0 | 0.254 | 1 | 0.614  |
| rs35435609  | 11 | 118502172 | T | C | 0.232  | 0.8163 | + | 0 | 0.051 | 1 | 0.8212 |
| rs882856    | 11 | 120107411 | G | A | -0.232 | 0.8163 | - | 0 | 0     | 0 | 1      |
| rs3138094   | 11 | 119288619 | G | A | -0.232 | 0.8164 | - | 0 | 0     | 0 | 1      |

|             |    |           |   |   |        |        |   |       |       |   |        |
|-------------|----|-----------|---|---|--------|--------|---|-------|-------|---|--------|
| rs60580523  | 11 | 117303242 | T | C | 0.232  | 0.8164 | + | 0     | 0     | 0 | 1      |
| rs61899043  | 11 | 119837947 | C | A | 0.232  | 0.8164 | + | 0     | 0     | 0 | 1      |
| rs632039    | 11 | 119885840 | C | T | 0.232  | 0.8166 | + | 0     | 0     | 0 | 1      |
| rs74849419  | 11 | 116583685 | A | G | -0.232 | 0.8167 | + | 0     | 0.336 | 1 | 0.562  |
| rs3138096   | 11 | 119286275 | G | C | -0.232 | 0.8168 | - | 0     | 0     | 0 | 1      |
| rs12418678  | 11 | 117232260 | G | A | 0.232  | 0.8169 | + | 0     | 0     | 0 | 1      |
| rs540787    | 11 | 120854479 | T | C | -0.231 | 0.817  | + | 0     | 0.254 | 1 | 0.6145 |
| rs11216697  | 11 | 117892362 | A | G | 0.231  | 0.8171 | + | 0     | 0     | 0 | 1      |
| rs570373    | 11 | 120846239 | G | A | -0.231 | 0.8171 | + | 0     | 0.254 | 1 | 0.6145 |
| rs12793214  | 11 | 118800302 | A | C | 0.231  | 0.8173 | + | 0     | 0.001 | 1 | 0.9792 |
| rs76126708  | 11 | 118259379 | C | A | 0.231  | 0.8173 | + | 0     | 0.211 | 1 | 0.6461 |
| rs10892456  | 11 | 119649342 | G | A | 0.231  | 0.8174 | + | 0     | 0     | 0 | 1      |
| rs1429512   | 11 | 119292314 | C | T | -0.231 | 0.8174 | - | 0     | 0     | 0 | 1      |
| rs590282    | 11 | 119881715 | A | G | 0.231  | 0.8174 | + | 0     | 0     | 0 | 1      |
| rs59969944  | 11 | 119233110 | A | G | 0.231  | 0.8174 | + | 0     | 0     | 0 | 1      |
| rs7111286   | 11 | 119272485 | C | G | -0.231 | 0.8174 | - | 0     | 0     | 0 | 1      |
| rs12575027  | 11 | 119276600 | A | G | -0.231 | 0.8176 | - | 0     | 0     | 0 | 1      |
| rs12577180  | 11 | 119276834 | C | A | -0.231 | 0.8176 | - | 0     | 0     | 0 | 1      |
| rs4938360   | 11 | 117098436 | T | C | -0.231 | 0.8176 | - | 0     | 0     | 0 | 1      |
| rs45480496  | 11 | 118270715 | A | G | 0.23   | 0.8177 | + | 0     | 0.227 | 1 | 0.6337 |
| rs77953246  | 11 | 116795987 | C | G | 0.231  | 0.8177 | + | 0     | 0     | 0 | 1      |
| rs11216390  | 11 | 117313135 | C | G | -0.23  | 0.8178 | - | 0     | 0     | 0 | 1      |
| rs1786690   | 11 | 118942067 | C | T | 0.23   | 0.8178 | + | 0     | 0     | 0 | 1      |
| rs7395971   | 11 | 119693573 | C | T | 0.23   | 0.8178 | + | 0     | 0     | 0 | 1      |
| rs10790313  | 11 | 119440066 | A | G | 0.23   | 0.8179 | + | 0     | 0     | 0 | 1      |
| rs12364267  | 11 | 117919377 | A | G | -0.23  | 0.8184 | - | 0     | 0     | 0 | 1      |
| rs2663643   | 11 | 119426636 | A | G | 0.23   | 0.8184 | + | 0     | 0     | 0 | 1      |
| rs2845662   | 11 | 119427242 | C | T | 0.23   | 0.8184 | + | 0     | 0     | 0 | 1      |
| rs11216881  | 11 | 118409539 | G | A | 0.229  | 0.8186 | + | 0     | 0.016 | 1 | 0.898  |
| rs180353    | 11 | 116604070 | C | T | -0.229 | 0.8186 | + | -18.6 | 2.529 | 1 | 0.1117 |
| rs11600793  | 11 | 119858507 | C | G | 0.229  | 0.8188 | + | 0     | 0     | 0 | 1      |
| rs12418314  | 11 | 119301580 | T | C | -0.229 | 0.819  | - | 0     | 0     | 0 | 1      |
| rs12418370  | 11 | 119301942 | A | G | -0.229 | 0.819  | - | 0     | 0     | 0 | 1      |
| rs12421120  | 11 | 119301754 | C | A | -0.229 | 0.819  | - | 0     | 0     | 0 | 1      |
| rs200041620 | 11 | 119840052 | A | G | -0.229 | 0.819  | - | 0     | 0     | 0 | 1      |
| rs556514    | 11 | 116317399 | T | C | -0.229 | 0.819  | - | 0     | 0     | 0 | 1      |
| rs694662    | 11 | 119895416 | T | A | 0.229  | 0.819  | + | 0     | 0     | 0 | 1      |
| rs731392    | 11 | 119840067 | G | C | -0.229 | 0.819  | - | 0     | 0     | 0 | 1      |
| rs10790395  | 11 | 120551419 | A | C | -0.229 | 0.8191 | - | 0     | 0     | 0 | 1      |
| rs6589621   | 11 | 117624420 | G | C | -0.229 | 0.8192 | - | 0     | 0     | 0 | 1      |
| rs148882737 | 11 | 117818210 | T | C | 0.228  | 0.8193 | + | 0     | 0     | 0 | 1      |
| rs4938431   | 11 | 117587186 | G | A | 0.228  | 0.8193 | + | 0     | 0     | 0 | 1      |
| rs4938432   | 11 | 117587345 | A | G | 0.228  | 0.8193 | + | 0     | 0     | 0 | 1      |
| rs35095598  | 11 | 119711999 | A | G | 0.228  | 0.8196 | + | 0     | 0     | 0 | 1      |
| rs1784461   | 11 | 118937985 | A | G | 0.228  | 0.8197 | + | 0     | 0     | 0 | 1      |
| rs147062051 | 11 | 117014926 | A | G | -0.228 | 0.8198 | - | 0     | 0     | 0 | 1      |
| rs181954995 | 11 | 117015290 | A | G | -0.228 | 0.8198 | - | 0     | 0     | 0 | 1      |
| rs2846281   | 11 | 118901166 | C | G | -0.228 | 0.8198 | - | 0     | 0     | 0 | 1      |
| rs61905473  | 11 | 117018031 | T | G | -0.228 | 0.8198 | - | 0     | 0     | 0 | 1      |
| rs61905476  | 11 | 117024537 | G | A | -0.228 | 0.8198 | - | 0     | 0     | 0 | 1      |
| rs1047079   | 11 | 118473231 | C | T | 0.228  | 0.82   | + | 0     | 0.244 | 1 | 0.6214 |
| rs10892610  | 11 | 120551572 | G | A | -0.228 | 0.82   | - | 0     | 0     | 0 | 1      |
| rs76544852  | 11 | 118487265 | T | G | -0.227 | 0.82   | + | 0     | 0.132 | 1 | 0.7161 |
| rs77368534  | 11 | 116362044 | G | T | 0.228  | 0.82   | + | 0     | 0     | 0 | 1      |
| rs76841836  | 11 | 120051217 | C | G | 0.227  | 0.8202 | + | 0     | 0     | 0 | 1      |
| rs499804    | 11 | 120852961 | A | C | -0.227 | 0.8203 | + | 0     | 0.251 | 1 | 0.6162 |

|             |    |           |   |   |        |        |    |       |       |   |         |
|-------------|----|-----------|---|---|--------|--------|----|-------|-------|---|---------|
| rs645156    | 11 | 120853259 | T | C | -0.227 | 0.8203 | -+ | 0     | 0.251 | 1 | 0.6162  |
| rs658696    | 11 | 120853941 | A | G | -0.227 | 0.8203 | -+ | 0     | 0.251 | 1 | 0.6162  |
| rs503361    | 11 | 116321311 | C | T | -0.227 | 0.8205 | -? | 0     | 0     | 0 | 1       |
| rs147136343 | 11 | 119923305 | T | A | 0.227  | 0.8206 | +? | 0     | 0     | 0 | 1       |
| rs4608095   | 11 | 119649969 | A | G | 0.227  | 0.8207 | +? | 0     | 0     | 0 | 1       |
| rs4938357   | 11 | 117084040 | A | G | 0.227  | 0.8208 | +? | 0     | 0     | 0 | 1       |
| rs56081989  | 11 | 117085305 | A | G | 0.227  | 0.8208 | +? | 0     | 0     | 0 | 1       |
| rs67201490  | 11 | 117083004 | G | T | 0.227  | 0.8208 | +? | 0     | 0     | 0 | 1       |
| rs513083    | 11 | 116330732 | T | C | 0.226  | 0.8211 | +? | 0     | 0     | 0 | 1       |
| rs61904858  | 11 | 116492107 | G | A | -0.226 | 0.8211 | -? | 0     | 0     | 0 | 1       |
| rs80106284  | 11 | 119501909 | T | G | -0.226 | 0.8212 | -? | 0     | 0     | 0 | 1       |
| rs10892608  | 11 | 120549745 | A | G | -0.226 | 0.8213 | -? | 0     | 0     | 0 | 1       |
| rs12222723  | 11 | 119650060 | T | G | 0.226  | 0.8213 | +? | 0     | 0     | 0 | 1       |
| rs3814762   | 11 | 119216504 | T | C | -0.226 | 0.8213 | -? | 0     | 0     | 0 | 1       |
| rs7929257   | 11 | 117891475 | T | C | 0.226  | 0.8214 | +? | 0     | 0     | 0 | 1       |
| rs112152942 | 11 | 118240840 | G | C | 0.226  | 0.8215 | -+ | 1.6   | 3.05  | 1 | 0.08072 |
| rs626440    | 11 | 119898559 | T | C | 0.226  | 0.8215 | +? | 0     | 0     | 0 | 1       |
| rs11601073  | 11 | 117776747 | T | C | 0.225  | 0.8217 | +? | 0     | 0     | 0 | 1       |
| rs78925312  | 11 | 119796352 | T | C | -0.225 | 0.8217 | -? | 0     | 0     | 0 | 1       |
| rs11217476  | 11 | 119633930 | A | C | -0.225 | 0.8218 | -? | 0     | 0     | 0 | 1       |
| rs1828279   | 11 | 119419117 | C | T | 0.225  | 0.8218 | +? | 0     | 0     | 0 | 1       |
| rs11217573  | 11 | 119788395 | G | A | -0.225 | 0.8221 | -? | 0     | 0     | 0 | 1       |
| rs1060745   | 11 | 120811386 | T | G | 0.225  | 0.8222 | +? | 0     | 0     | 0 | 1       |
| rs12292921  | 11 | 116621963 | G | T | -0.225 | 0.8222 | +- | -21.6 | 2.467 | 1 | 0.1162  |
| rs1939671   | 11 | 120675437 | A | G | 0.225  | 0.8222 | +? | 0     | 0     | 0 | 1       |
| rs550974    | 11 | 118937106 | T | A | 0.225  | 0.8222 | +? | 0     | 0     | 0 | 1       |
| rs180999772 | 11 | 120074973 | A | G | 0.225  | 0.8223 | +? | 0     | 0     | 0 | 1       |
| rs61905088  | 11 | 116619867 | A | C | -0.224 | 0.8226 | +- | -15.2 | 2.604 | 1 | 0.1066  |
| rs61905526  | 11 | 117067465 | T | C | -0.224 | 0.8227 | -? | 0     | 0     | 0 | 1       |
| rs61905527  | 11 | 117069966 | T | C | -0.224 | 0.8227 | -? | 0     | 0     | 0 | 1       |
| rs2511833   | 11 | 119197379 | G | A | -0.224 | 0.8229 | -? | 0     | 0     | 0 | 1       |
| rs4454730   | 11 | 118937444 | A | G | 0.224  | 0.8229 | +? | 0     | 0     | 0 | 1       |
| rs4545564   | 11 | 118937518 | C | T | 0.224  | 0.8229 | +? | 0     | 0     | 0 | 1       |
| rs6589741   | 11 | 119311481 | A | T | -0.224 | 0.8229 | -? | 0     | 0     | 0 | 1       |
| rs6589743   | 11 | 119311933 | T | A | -0.224 | 0.8229 | -? | 0     | 0     | 0 | 1       |
| rs6589744   | 11 | 119312014 | G | A | -0.224 | 0.8229 | -? | 0     | 0     | 0 | 1       |
| rs45468196  | 11 | 118242889 | A | G | 0.224  | 0.8231 | -+ | 1.2   | 3.037 | 1 | 0.08136 |
| rs2077582   | 11 | 119880501 | T | C | 0.223  | 0.8232 | +? | 0     | 0     | 0 | 1       |
| rs638979    | 11 | 117454633 | T | C | 0.223  | 0.8232 | +? | 0     | 0     | 0 | 1       |
| rs1307145   | 11 | 118950217 | G | C | 0.223  | 0.8234 | +? | 0     | 0     | 0 | 1       |
| rs3020184   | 11 | 120670036 | A | G | 0.223  | 0.8234 | +? | 0     | 0     | 0 | 1       |
| rs7932332   | 11 | 119314765 | G | A | -0.223 | 0.8234 | -? | 0     | 0     | 0 | 1       |
| rs10892457  | 11 | 119649359 | T | C | 0.223  | 0.8236 | +? | 0     | 0     | 0 | 1       |
| rs61904849  | 11 | 116456027 | A | G | -0.223 | 0.8237 | -? | 0     | 0     | 0 | 1       |
| rs694490    | 11 | 121095669 | C | A | -0.223 | 0.8237 | -+ | 0     | 0.082 | 1 | 0.775   |
| rs11216780  | 11 | 118009385 | G | A | 0.222  | 0.824  | +? | 0     | 0     | 0 | 1       |
| rs565420    | 11 | 116481436 | A | G | 0.222  | 0.824  | +? | 0     | 0     | 0 | 1       |
| rs12280559  | 11 | 118087040 | T | C | -0.222 | 0.8241 | -+ | 0     | 0.527 | 1 | 0.4679  |
| rs1784302   | 11 | 118940957 | G | C | 0.222  | 0.8241 | +? | 0     | 0     | 0 | 1       |
| rs7119539   | 11 | 120549404 | G | A | -0.222 | 0.8243 | -? | 0     | 0     | 0 | 1       |
| rs57680824  | 11 | 117313882 | G | A | 0.222  | 0.8244 | +? | 0     | 0     | 0 | 1       |
| rs10736488  | 11 | 117285057 | G | A | 0.222  | 0.8245 | +? | 0     | 0     | 0 | 1       |
| rs7932700   | 11 | 118411713 | T | G | 0.222  | 0.8245 | ++ | 0     | 0.002 | 1 | 0.9663  |
| rs56667128  | 11 | 120097175 | A | G | 0.222  | 0.8246 | +? | 0     | 0     | 0 | 1       |
| rs7124361   | 11 | 120460445 | G | A | 0.221  | 0.8249 | +? | 0     | 0     | 0 | 1       |
| rs2075294   | 11 | 116658122 | T | G | 0.221  | 0.825  | +- | -81.6 | 1.652 | 1 | 0.1987  |

|              |    |           |   |   |        |        |    |       |       |   |        |
|--------------|----|-----------|---|---|--------|--------|----|-------|-------|---|--------|
| rs645451     | 11 | 118025969 | T | C | -0.221 | 0.8251 | -? | 0     | 0     | 0 | 1      |
| rs117279127  | 11 | 117072074 | T | C | -0.221 | 0.8254 | -? | 0     | 0     | 0 | 1      |
| rs482287     | 11 | 117336108 | T | C | 0.221  | 0.8254 | +  | 0     | 0     | 0 | 1      |
| rs59455853   | 11 | 116607874 | T | A | -0.22  | 0.8257 | +- | -42.1 | 2.111 | 1 | 0.1462 |
| rs638948     | 11 | 119899143 | C | T | 0.22   | 0.8258 | +  | 0     | 0     | 0 | 1      |
| rs7951479    | 11 | 119840401 | T | C | -0.22  | 0.826  | -? | 0     | 0     | 0 | 1      |
| rs11216610   | 11 | 117769468 | A | G | -0.22  | 0.8262 | -? | 0     | 0     | 0 | 1      |
| rs3894251    | 11 | 117313577 | C | G | 0.219  | 0.8263 | +  | 0     | 0     | 0 | 1      |
| rs4938659    | 11 | 119315789 | T | C | -0.219 | 0.8263 | -? | 0     | 0     | 0 | 1      |
| rs2845708    | 11 | 120105099 | A | T | -0.219 | 0.8264 | -? | 0     | 0     | 0 | 1      |
| rs45443305   | 11 | 116645682 | A | C | 0.219  | 0.8265 | +- | -81.9 | 1.649 | 1 | 0.1991 |
| rs2015482    | 11 | 117624058 | A | G | -0.219 | 0.8266 | -? | 0     | 0     | 0 | 1      |
| rs542869     | 11 | 117225455 | A | T | 0.219  | 0.8266 | +  | 0     | 0     | 0 | 1      |
| rs4622279    | 11 | 119446118 | A | G | -0.219 | 0.8267 | -? | 0     | 0     | 0 | 1      |
| rs61906485   | 11 | 117082691 | T | G | -0.219 | 0.8267 | -? | 0     | 0     | 0 | 1      |
| rs10892609   | 11 | 120551100 | C | T | -0.219 | 0.8269 | -? | 0     | 0     | 0 | 1      |
| rs4576834    | 11 | 119542000 | T | C | 0.219  | 0.8269 | +  | 0     | 0     | 0 | 1      |
| rs57200947   | 11 | 116623674 | T | C | -0.219 | 0.8269 | +- | -20.2 | 2.496 | 1 | 0.1141 |
| rs7102643    | 11 | 119961097 | T | C | 0.219  | 0.8269 | +  | 0     | 0     | 0 | 1      |
| rs34655967   | 11 | 119792036 | A | C | 0.218  | 0.8272 | +  | 0     | 0     | 0 | 1      |
| rs10750125   | 11 | 117989989 | C | T | -0.218 | 0.8273 | -- | 0     | 0.003 | 1 | 0.9561 |
| rs12295438   | 11 | 118094921 | T | C | -0.218 | 0.8274 | +  | 0     | 0.036 | 1 | 0.8499 |
| rs638399     | 11 | 119898995 | T | C | 0.218  | 0.8276 | +  | 0     | 0     | 0 | 1      |
| rs7102217    | 11 | 120187433 | T | C | -0.218 | 0.8277 | -? | 0     | 0     | 0 | 1      |
| rs12418475   | 11 | 119851369 | A | G | -0.217 | 0.8279 | -? | 0     | 0     | 0 | 1      |
| rs594171     | 11 | 118032974 | A | T | 0.217  | 0.828  | +  | 0     | 0.531 | 1 | 0.4663 |
| rs12788547   | 11 | 119306878 | A | C | -0.217 | 0.8285 | -? | 0     | 0     | 0 | 1      |
| rs11825621   | 11 | 118494790 | C | T | 0.216  | 0.8286 | ++ | 0     | 0.055 | 1 | 0.8142 |
| rs11217843   | 11 | 120239937 | G | A | 0.216  | 0.8288 | +  | 0     | 0     | 0 | 1      |
| rs4938746    | 11 | 119856226 | G | A | 0.216  | 0.8288 | +  | 0     | 0     | 0 | 1      |
| rs896693     | 11 | 120067082 | A | G | -0.216 | 0.8288 | +- | 0     | 0.397 | 1 | 0.5286 |
| rs111864243  | 11 | 117291492 | C | T | 0.216  | 0.8289 | +  | 0     | 0     | 0 | 1      |
| rs112333700  | 11 | 117071505 | T | C | -0.216 | 0.829  | -? | 0     | 0     | 0 | 1      |
| rs74853011   | 11 | 117217533 | G | C | 0.216  | 0.829  | +  | 0     | 0     | 0 | 1      |
| rs76257648   | 11 | 117322099 | A | C | -0.216 | 0.829  | -? | 0     | 0     | 0 | 1      |
| rs79801428   | 11 | 116494264 | A | G | -0.216 | 0.8292 | -? | 0     | 0     | 0 | 1      |
| rs12803528   | 11 | 120905810 | A | C | 0.216  | 0.8293 | +  | 0     | 0     | 0 | 1      |
| rs180373     | 11 | 116591553 | A | C | -0.216 | 0.8293 | +  | 0     | 0.23  | 1 | 0.6313 |
| rs2187009    | 11 | 117974484 | T | C | -0.216 | 0.8293 | -? | 0     | 0     | 0 | 1      |
| rs11216899   | 11 | 118434421 | G | A | 0.216  | 0.8294 | +- | 0     | 0.035 | 1 | 0.8519 |
| rs60753148   | 11 | 118434835 | T | C | 0.216  | 0.8294 | +- | 0     | 0.035 | 1 | 0.8519 |
| rs1232770834 | 11 | 117096652 | A | G | -0.215 | 0.8295 | -? | 0     | 0     | 0 | 1      |
| rs10892413   | 11 | 119463270 | A | G | -0.215 | 0.8296 | -? | 0     | 0     | 0 | 1      |
| rs537997     | 11 | 117451316 | T | C | 0.215  | 0.8297 | +  | 0     | 0     | 0 | 1      |
| rs1263056    | 11 | 116576415 | G | A | -0.215 | 0.8299 | +- | 0     | 0.526 | 1 | 0.4683 |
| rs59700451   | 11 | 116982928 | A | G | -0.215 | 0.8299 | -? | 0     | 0     | 0 | 1      |
| rs474490     | 11 | 117287794 | T | G | 0.215  | 0.83   | +  | 0     | 0     | 0 | 1      |
| rs11216060   | 11 | 116502267 | A | G | 0.214  | 0.8302 | +  | 0     | 0     | 0 | 1      |
| rs2845706    | 11 | 120101780 | A | G | 0.214  | 0.8302 | +  | 0     | 0     | 0 | 1      |
| rs638000     | 11 | 119885914 | T | C | 0.214  | 0.8302 | +  | 0     | 0     | 0 | 1      |
| rs11216705   | 11 | 117897020 | C | T | 0.214  | 0.8303 | +  | 0     | 0     | 0 | 1      |
| rs2276423    | 11 | 118210106 | G | C | -0.214 | 0.8303 | +  | -91.6 | 1.566 | 1 | 0.2108 |
| rs61906106   | 11 | 116550548 | A | C | 0.214  | 0.8303 | +  | 0     | 0     | 0 | 1      |
| rs12798929   | 11 | 117776850 | T | C | 0.214  | 0.8304 | +  | 0     | 0     | 0 | 1      |
| rs2082049    | 11 | 119317208 | G | A | -0.214 | 0.8305 | -? | 0     | 0     | 0 | 1      |
| rs61903459   | 11 | 116989185 | G | A | -0.214 | 0.8305 | -? | 0     | 0     | 0 | 1      |

|              |    |           |   |   |        |        |    |      |        |   |           |
|--------------|----|-----------|---|---|--------|--------|----|------|--------|---|-----------|
| rs11216366   | 11 | 117231611 | T | G | 0.214  | 0.8306 | +? | 0    | 0      | 0 | 1         |
| rs1405963027 | 11 | 119838112 | G | A | -0.214 | 0.8306 | -? | 0    | 0      | 0 | 1         |
| rs2508664    | 11 | 117229891 | T | C | 0.214  | 0.8306 | +? | 0    | 0      | 0 | 1         |
| rs9919543    | 11 | 116473707 | G | C | -0.214 | 0.8306 | -? | 0    | 0      | 0 | 1         |
| rs7483165    | 11 | 117691774 | C | T | 0.214  | 0.8308 | +? | 0    | 0      | 0 | 1         |
| rs11217316   | 11 | 119428141 | A | G | -0.213 | 0.831  | -? | 0    | 0      | 0 | 1         |
| rs11607839   | 11 | 119680383 | C | A | -0.213 | 0.831  | -? | 0    | 0      | 0 | 1         |
| rs2076765    | 11 | 120053941 | G | A | -0.213 | 0.831  | -? | 0    | 0      | 0 | 1         |
| rs10892516   | 11 | 119896830 | C | T | 0.213  | 0.8311 | +? | 0    | 0      | 0 | 1         |
| rs12362930   | 11 | 116510138 | C | T | -0.213 | 0.8311 | -? | 0    | 0      | 0 | 1         |
| rs75215496   | 11 | 121145466 | C | T | 0.213  | 0.8311 | +? | 0    | 0      | 0 | 1         |
| rs7943511    | 11 | 118096165 | T | C | -0.213 | 0.8311 | -+ | 0    | 0.043  | 1 | 0.8357    |
| rs75387178   | 11 | 117999224 | C | G | -0.213 | 0.8312 | -? | 0    | 0      | 0 | 1         |
| rs3018386    | 11 | 118016622 | G | C | -0.213 | 0.8313 | +- | 0    | 0.816  | 1 | 0.3663    |
| rs11822532   | 11 | 119690746 | A | G | 0.213  | 0.8315 | +? | 0    | 0      | 0 | 1         |
| rs2248887    | 11 | 120424000 | A | G | -0.212 | 0.8318 | -? | 0    | 0      | 0 | 1         |
| rs2845705    | 11 | 120101092 | A | T | 0.212  | 0.8318 | +? | 0    | 0      | 0 | 1         |
| rs2845650    | 11 | 119421928 | C | T | 0.212  | 0.8319 | +? | 0    | 0      | 0 | 1         |
| rs60514290   | 11 | 118246048 | C | G | 0.212  | 0.832  | +- | 0    | 0.177  | 1 | 0.6741    |
| rs7952470    | 11 | 117248268 | A | G | 0.212  | 0.832  | +? | 0    | 0      | 0 | 1         |
| rs4326835    | 11 | 118432404 | T | G | 0.212  | 0.8322 | +- | 0    | 0.015  | 1 | 0.9022    |
| rs113570704  | 11 | 117578314 | T | C | 0.212  | 0.8323 | +? | 0    | 0      | 0 | 1         |
| rs12290522   | 11 | 118486325 | T | C | -0.212 | 0.8323 | -+ | 0    | 0.485  | 1 | 0.4861    |
| rs12574878   | 11 | 117577527 | T | C | 0.212  | 0.8323 | +? | 0    | 0      | 0 | 1         |
| rs12576082   | 11 | 117577558 | A | T | 0.212  | 0.8323 | +? | 0    | 0      | 0 | 1         |
| rs12577066   | 11 | 117577909 | G | A | 0.212  | 0.8323 | +? | 0    | 0      | 0 | 1         |
| rs1310160088 | 11 | 117579516 | T | C | 0.212  | 0.8323 | +? | 0    | 0      | 0 | 1         |
| rs78696045   | 11 | 117579607 | T | A | 0.212  | 0.8323 | +? | 0    | 0      | 0 | 1         |
| rs2509121    | 11 | 118928253 | T | C | 0.212  | 0.8324 | +? | 0    | 0      | 0 | 1         |
| rs2846092    | 11 | 120641809 | A | G | 0.211  | 0.8326 | +? | 0    | 0      | 0 | 1         |
| rs10892504   | 11 | 119836087 | A | G | -0.211 | 0.8327 | -? | 0    | 0      | 0 | 1         |
| rs11606348   | 11 | 120860672 | C | T | -0.211 | 0.8327 | -? | 0    | 0      | 0 | 1         |
| rs113523070  | 11 | 117737557 | A | G | -0.211 | 0.8328 | -? | 0    | 0      | 0 | 1         |
| rs141474528  | 11 | 116952296 | G | C | -0.211 | 0.8331 | -+ | 73.2 | 11.184 | 1 | 0.000825  |
| rs59912111   | 11 | 120398707 | A | C | -0.211 | 0.8331 | -? | 0    | 0      | 0 | 1         |
| rs80068626   | 11 | 116951926 | C | T | -0.211 | 0.8331 | -+ | 73.2 | 11.184 | 1 | 0.000825  |
| rs10790389   | 11 | 120540086 | C | G | 0.21   | 0.8333 | +? | 0    | 0      | 0 | 1         |
| rs7928043    | 11 | 120498338 | A | G | 0.21   | 0.8333 | +? | 0    | 0      | 0 | 1         |
| rs7111455    | 11 | 119316614 | T | C | -0.21  | 0.8335 | -? | 0    | 0      | 0 | 1         |
| rs1848373    | 11 | 116341125 | A | T | -0.21  | 0.8336 | -? | 0    | 0      | 0 | 1         |
| rs61905715   | 11 | 116913051 | T | C | -0.21  | 0.8336 | -? | 0    | 0      | 0 | 1         |
| rs12285142   | 11 | 117557435 | T | C | 0.21   | 0.8337 | +? | 0    | 0      | 0 | 1         |
| rs12787144   | 11 | 116304152 | A | G | 0.21   | 0.8338 | +? | 0    | 0      | 0 | 1         |
| rs1793185    | 11 | 118089434 | A | C | -0.21  | 0.8338 | -+ | 0    | 0.598  | 1 | 0.4393    |
| rs11216839   | 11 | 118129583 | T | A | -0.21  | 0.8339 | -+ | 0    | 0.255  | 1 | 0.6138    |
| rs1995823    | 11 | 119446483 | T | C | 0.21   | 0.8339 | +? | 0    | 0      | 0 | 1         |
| rs4245169    | 11 | 117180905 | T | C | -0.21  | 0.834  | -? | 0    | 0      | 0 | 1         |
| rs142836613  | 11 | 116957158 | G | A | -0.209 | 0.8341 | -+ | 73   | 11.127 | 1 | 0.0008509 |
| rs1790477    | 11 | 120024827 | A | G | -0.209 | 0.8342 | -? | 0    | 0      | 0 | 1         |
| rs2155368    | 11 | 121096292 | C | A | -0.209 | 0.8342 | -+ | 0    | 0.077  | 1 | 0.7809    |
| rs11820810   | 11 | 120546088 | G | A | 0.209  | 0.8343 | +? | 0    | 0      | 0 | 1         |
| rs593598     | 11 | 119897949 | G | A | 0.209  | 0.8343 | +? | 0    | 0      | 0 | 1         |
| rs648009     | 11 | 119897964 | A | G | 0.209  | 0.8343 | +? | 0    | 0      | 0 | 1         |
| rs1168568    | 11 | 118949799 | A | G | 0.209  | 0.8344 | +? | 0    | 0      | 0 | 1         |
| rs3802866    | 11 | 118095803 | T | C | -0.209 | 0.8344 | -+ | 0    | 0.042  | 1 | 0.8377    |
| rs7943272    | 11 | 118096028 | C | A | -0.209 | 0.8344 | -+ | 0    | 0.042  | 1 | 0.8377    |

|             |    |           |   |   |        |        |   |        |       |   |         |
|-------------|----|-----------|---|---|--------|--------|---|--------|-------|---|---------|
| rs1177563   | 11 | 118949083 | A | G | 0.209  | 0.8347 | + | 0      | 0     | 0 | 1       |
| rs74498740  | 11 | 117529895 | T | C | -0.209 | 0.8348 | - | 0      | 0     | 0 | 1       |
| rs79735246  | 11 | 117559725 | G | A | -0.208 | 0.8349 | - | 0      | 0     | 0 | 1       |
| rs112550735 | 11 | 118303200 | C | T | 0.208  | 0.835  | + | 5.4    | 3.173 | 1 | 0.07488 |
| rs77728961  | 11 | 118303182 | C | T | 0.208  | 0.835  | + | 5.4    | 3.173 | 1 | 0.07488 |
| rs4938711   | 11 | 119566184 | T | C | 0.208  | 0.8351 | + | 0      | 0     | 0 | 1       |
| rs61906486  | 11 | 117082865 | A | C | -0.208 | 0.8351 | - | 0      | 0     | 0 | 1       |
| rs12419822  | 11 | 116326138 | A | C | -0.208 | 0.8353 | - | 0      | 0     | 0 | 1       |
| rs8192614   | 11 | 118037564 | A | G | -0.208 | 0.8354 | + | 0      | 0.165 | 1 | 0.685   |
| rs34271655  | 11 | 121090790 | C | T | -0.208 | 0.8355 | - | 0      | 0     | 0 | 1       |
| rs4938744   | 11 | 119836899 | A | G | -0.208 | 0.8355 | - | 0      | 0     | 0 | 1       |
| rs4938745   | 11 | 119837342 | G | A | -0.208 | 0.8355 | - | 0      | 0     | 0 | 1       |
| rs61899023  | 11 | 119803362 | A | G | -0.208 | 0.8355 | - | 0      | 0     | 0 | 1       |
| rs79508602  | 11 | 119836246 | T | C | -0.208 | 0.8355 | - | 0      | 0     | 0 | 1       |
| rs78795346  | 11 | 117297406 | A | G | 0.208  | 0.8356 | + | 0      | 0     | 0 | 1       |
| rs61906491  | 11 | 117102200 | A | G | 0.207  | 0.8357 | + | 0      | 0     | 0 | 1       |
| rs2509667   | 11 | 119361224 | A | C | -0.207 | 0.8358 | - | 0      | 0     | 0 | 1       |
| rs56103633  | 11 | 119308201 | T | C | -0.207 | 0.8362 | - | 0      | 0     | 0 | 1       |
| rs7130634   | 11 | 119309000 | A | T | -0.207 | 0.8362 | - | 0      | 0     | 0 | 1       |
| rs74662600  | 11 | 116654959 | A | G | 0.207  | 0.8363 | + | -84    | 1.631 | 1 | 0.2016  |
| rs7926717   | 11 | 118121399 | T | G | -0.207 | 0.8363 | + | 0      | 0.248 | 1 | 0.6187  |
| rs486915    | 11 | 116534288 | A | T | -0.207 | 0.8364 | - | 0      | 0     | 0 | 1       |
| rs10892220  | 11 | 117989835 | A | T | -0.206 | 0.8365 | - | 0      | 0.007 | 1 | 0.9352  |
| rs4258392   | 11 | 119649844 | C | T | 0.206  | 0.8368 | + | 0      | 0     | 0 | 1       |
| rs5020633   | 11 | 119649874 | A | G | 0.206  | 0.8368 | + | 0      | 0     | 0 | 1       |
| rs7108308   | 11 | 117586011 | G | C | 0.206  | 0.8369 | + | 0      | 0     | 0 | 1       |
| rs1939977   | 11 | 117614720 | A | G | 0.205  | 0.8372 | + | 0      | 0     | 0 | 1       |
| rs477389    | 11 | 120850185 | G | C | -0.206 | 0.8372 | + | 0      | 0.239 | 1 | 0.6249  |
| rs478978    | 11 | 120850070 | G | C | -0.205 | 0.8372 | + | 0      | 0.239 | 1 | 0.625   |
| rs564674    | 11 | 117227519 | T | C | 0.205  | 0.8372 | + | 0      | 0     | 0 | 1       |
| rs61905704  | 11 | 116883665 | C | T | -0.205 | 0.8372 | - | 0      | 0     | 0 | 1       |
| rs1287836   | 11 | 119792728 | C | A | -0.205 | 0.8373 | - | 0      | 0     | 0 | 1       |
| rs61907561  | 11 | 116726796 | G | C | -0.205 | 0.8373 | - | 0      | 0     | 0 | 1       |
| rs2508490   | 11 | 120099679 | G | A | 0.205  | 0.8374 | + | 0      | 0     | 0 | 1       |
| rs670855    | 11 | 120001695 | T | C | 0.205  | 0.8374 | + | 0      | 0     | 0 | 1       |
| rs56137014  | 11 | 117896521 | A | T | 0.205  | 0.8376 | + | 0      | 0     | 0 | 1       |
| rs572675    | 11 | 117771888 | A | C | -0.204 | 0.838  | - | 0      | 0     | 0 | 1       |
| rs7130266   | 11 | 119295063 | G | A | -0.204 | 0.838  | - | 0      | 0     | 0 | 1       |
| rs10892019  | 11 | 116578223 | T | C | 0.204  | 0.8382 | + | -60.7  | 1.866 | 1 | 0.1719  |
| rs12797305  | 11 | 119494843 | G | A | -0.204 | 0.8382 | - | 0      | 0     | 0 | 1       |
| rs150311062 | 11 | 117315326 | A | G | -0.204 | 0.8382 | - | 0      | 0     | 0 | 1       |
| rs7940537   | 11 | 117656550 | A | G | -0.204 | 0.8382 | + | 0      | 0.072 | 1 | 0.7886  |
| rs11217771  | 11 | 120098180 | G | C | 0.204  | 0.8383 | + | 0      | 0     | 0 | 1       |
| rs11824414  | 11 | 116348112 | G | A | 0.204  | 0.8384 | + | 0      | 0     | 0 | 1       |
| rs67744990  | 11 | 119364296 | T | G | 0.204  | 0.8384 | + | 0      | 0     | 0 | 1       |
| rs6589602   | 11 | 117037065 | T | C | 0.204  | 0.8385 | + | 0      | 0     | 0 | 1       |
| rs66657611  | 11 | 117430164 | T | C | -0.204 | 0.8385 | - | 0      | 0     | 0 | 1       |
| rs58507982  | 11 | 118146510 | T | C | -0.204 | 0.8386 | - | 0      | 0     | 0 | 1       |
| rs5090      | 11 | 116694055 | G | C | -0.203 | 0.8388 | - | 0      | 0     | 0 | 1       |
| rs2368426   | 11 | 119463904 | A | G | -0.203 | 0.8389 | - | 0      | 0     | 0 | 1       |
| rs17121050  | 11 | 117533773 | A | G | -0.203 | 0.8391 | - | 0      | 0     | 0 | 1       |
| rs524990    | 11 | 121095824 | G | T | -0.203 | 0.8391 | + | 0      | 0.075 | 1 | 0.7837  |
| rs59255488  | 11 | 118986118 | T | C | -0.203 | 0.8391 | - | 0      | 0     | 0 | 1       |
| rs12792262  | 11 | 116230972 | A | G | -0.203 | 0.8393 | + | -139.7 | 1.252 | 1 | 0.2632  |
| rs4938371   | 11 | 117193741 | T | C | 0.203  | 0.8394 | + | 0      | 0     | 0 | 1       |
| rs11216900  | 11 | 118436079 | C | G | 0.202  | 0.8396 | + | 0      | 0.038 | 1 | 0.8446  |

|              |    |           |   |   |        |        |    |        |       |   |         |
|--------------|----|-----------|---|---|--------|--------|----|--------|-------|---|---------|
| rs10750178   | 11 | 120823528 | A | G | -0.202 | 0.8397 | -? | 0      | 0     | 0 | 1       |
| rs11216275   | 11 | 116975704 | G | T | -0.202 | 0.8398 | -? | 0      | 0     | 0 | 1       |
| rs4142639    | 11 | 117604493 | G | A | 0.202  | 0.8398 | +  | 0      | 0     | 0 | 1       |
| rs17245789   | 11 | 120904249 | G | A | 0.202  | 0.8399 | +  | 0      | 0     | 0 | 1       |
| rs2277295    | 11 | 118416253 | T | C | 0.202  | 0.84   | ++ | 0      | 0.012 | 1 | 0.9146  |
| rs17124222   | 11 | 120580969 | G | C | 0.202  | 0.8401 | +  | 0      | 0     | 0 | 1       |
| rs1185460    | 11 | 118943433 | G | A | 0.202  | 0.8402 | +  | 0      | 0     | 0 | 1       |
| rs5020632    | 11 | 119649863 | T | C | 0.202  | 0.8402 | +  | 0      | 0     | 0 | 1       |
| rs9332817    | 11 | 118365210 | C | G | 0.201  | 0.8404 | -+ | 0      | 0.197 | 1 | 0.6573  |
| rs6589542    | 11 | 116230459 | C | A | -0.201 | 0.8405 | +- | -138.2 | 1.259 | 1 | 0.2618  |
| rs7108845    | 11 | 118407523 | G | T | 0.201  | 0.8406 | ++ | 0      | 0.001 | 1 | 0.9765  |
| rs28927680   | 11 | 116619073 | G | C | -0.201 | 0.8408 | +- | -36.9  | 2.191 | 1 | 0.1388  |
| rs610831     | 11 | 119897453 | C | A | 0.201  | 0.8408 | +  | 0      | 0     | 0 | 1       |
| rs490043     | 11 | 116316173 | G | A | -0.201 | 0.8409 | -? | 0      | 0     | 0 | 1       |
| rs562966     | 11 | 120076116 | C | T | 0.201  | 0.8409 | +  | 0      | 0     | 0 | 1       |
| rs6589798    | 11 | 119971490 | T | G | 0.201  | 0.8409 | +  | 0      | 0     | 0 | 1       |
| rs12793378   | 11 | 116230993 | A | T | -0.2   | 0.8411 | +- | -139.1 | 1.255 | 1 | 0.2627  |
| rs76173441   | 11 | 119658314 | C | G | 0.2    | 0.8411 | +  | 0      | 0     | 0 | 1       |
| rs1812974    | 11 | 120221068 | T | C | 0.2    | 0.8412 | +  | 0      | 0     | 0 | 1       |
| rs4936560    | 11 | 120718009 | C | T | -0.2   | 0.8412 | -? | 0      | 0     | 0 | 1       |
| rs74948313   | 11 | 116507582 | G | A | -0.2   | 0.8413 | -? | 0      | 0     | 0 | 1       |
| rs1455831109 | 11 | 117591241 | T | C | 0.2    | 0.8414 | +  | 0      | 0     | 0 | 1       |
| rs80254203   | 11 | 120123886 | C | G | -0.2   | 0.8415 | -? | 0      | 0     | 0 | 1       |
| rs4341549    | 11 | 119637414 | G | A | 0.2    | 0.8417 | +  | 0      | 0     | 0 | 1       |
| rs75507001   | 11 | 116577694 | A | C | -0.2   | 0.8417 | -? | 0      | 0     | 0 | 1       |
| rs7950059    | 11 | 119565495 | T | C | 0.2    | 0.8417 | +  | 0      | 0     | 0 | 1       |
| rs4278525    | 11 | 119499592 | A | G | 0.2    | 0.8418 | +  | 0      | 0     | 0 | 1       |
| rs11601034   | 11 | 119789176 | T | C | -0.199 | 0.8419 | -? | 0      | 0     | 0 | 1       |
| rs35385093   | 11 | 119715710 | A | G | 0.199  | 0.8419 | +  | 0      | 0     | 0 | 1       |
| rs4938680    | 11 | 119414321 | C | G | 0.199  | 0.8419 | +  | 0      | 0     | 0 | 1       |
| rs61905718   | 11 | 116919677 | T | C | -0.199 | 0.8419 | -? | 0      | 0     | 0 | 1       |
| rs623952     | 11 | 121095863 | A | T | -0.199 | 0.8419 | -+ | 0      | 0.074 | 1 | 0.7853  |
| rs883863     | 11 | 116389017 | A | G | -0.199 | 0.842  | -? | 0      | 0     | 0 | 1       |
| rs553709     | 11 | 117726474 | C | T | -0.199 | 0.8421 | -? | 0      | 0     | 0 | 1       |
| rs671567     | 11 | 117936146 | A | G | -0.199 | 0.8421 | -? | 0      | 0     | 0 | 1       |
| rs10892206   | 11 | 117919746 | A | T | -0.199 | 0.8422 | -? | 0      | 0     | 0 | 1       |
| rs12287066   | 11 | 116662331 | T | G | -0.199 | 0.8422 | +- | -84.7  | 1.624 | 1 | 0.2025  |
| rs2242133    | 11 | 117304196 | T | C | 0.199  | 0.8422 | +  | 0      | 0     | 0 | 1       |
| rs147774547  | 11 | 119287416 | T | C | -0.199 | 0.8425 | -? | 0      | 0     | 0 | 1       |
| rs2096961    | 11 | 116503644 | A | G | 0.199  | 0.8425 | +  | 0      | 0     | 0 | 1       |
| rs7121195    | 11 | 117729616 | A | G | -0.199 | 0.8425 | -? | 0      | 0     | 0 | 1       |
| rs45555733   | 11 | 118237566 | G | C | 0.198  | 0.8427 | -+ | 3.4    | 3.105 | 1 | 0.07806 |
| rs596707     | 11 | 117371824 | C | T | -0.198 | 0.8427 | -? | 0      | 0     | 0 | 1       |
| rs10892677   | 11 | 121019288 | T | C | -0.198 | 0.8428 | -? | 0      | 0     | 0 | 1       |
| rs620602     | 11 | 120006705 | G | A | -0.198 | 0.8428 | -? | 0      | 0     | 0 | 1       |
| rs3802869    | 11 | 118034870 | A | G | 0.198  | 0.8429 | +  | 0      | 0     | 0 | 1       |
| rs748316     | 11 | 117469590 | C | T | 0.198  | 0.8429 | +  | 0      | 0     | 0 | 1       |
| rs884395     | 11 | 119485214 | G | A | -0.198 | 0.8429 | -? | 0      | 0     | 0 | 1       |
| rs588052     | 11 | 119882223 | C | T | 0.198  | 0.843  | +  | 0      | 0     | 0 | 1       |
| rs637525     | 11 | 121095137 | G | A | -0.198 | 0.843  | -+ | 0      | 0.074 | 1 | 0.7859  |
| rs2004235    | 11 | 118008212 | C | T | -0.198 | 0.8431 | -+ | 0      | 0.091 | 1 | 0.7625  |
| rs61903740   | 11 | 117226773 | A | C | -0.198 | 0.8431 | -? | 0      | 0     | 0 | 1       |
| rs61903741   | 11 | 117226941 | A | T | -0.198 | 0.8431 | -? | 0      | 0     | 0 | 1       |
| rs12785990   | 11 | 116563706 | A | G | 0.198  | 0.8432 | +  | 0      | 0     | 0 | 1       |
| rs1349689    | 11 | 119978334 | T | A | -0.198 | 0.8432 | -? | 0      | 0     | 0 | 1       |
| rs118089075  | 11 | 120398765 | T | C | 0.198  | 0.8434 | +  | 0      | 0     | 0 | 1       |

|              |    |           |   |   |        |        |    |       |       |   |         |
|--------------|----|-----------|---|---|--------|--------|----|-------|-------|---|---------|
| rs1814964    | 11 | 118006957 | C | T | -0.198 | 0.8434 | +  | 0     | 0.071 | 1 | 0.7905  |
| rs73004754   | 11 | 120053576 | A | G | -0.197 | 0.8435 | -? | 0     | 0     | 0 | 1       |
| rs11216534   | 11 | 117629468 | T | C | -0.197 | 0.8436 | +- | 14.8  | 3.519 | 1 | 0.06065 |
| rs11216535   | 11 | 117629559 | T | C | -0.197 | 0.8436 | +- | 14.8  | 3.519 | 1 | 0.06065 |
| rs17584190   | 11 | 117153815 | T | C | 0.197  | 0.8437 | +  | 0     | 0     | 0 | 1       |
| rs7944453    | 11 | 117599750 | A | G | 0.197  | 0.8437 | +  | 0     | 0     | 0 | 1       |
| rs1243337    | 11 | 117270818 | C | A | -0.197 | 0.8439 | -? | 0     | 0     | 0 | 1       |
| rs554282497  | 11 | 119495043 | C | G | 0.197  | 0.8439 | +  | 0     | 0     | 0 | 1       |
| rs117018659  | 11 | 121086259 | A | G | -0.197 | 0.844  | -? | 0     | 0     | 0 | 1       |
| rs489164     | 11 | 116316777 | C | T | -0.197 | 0.8441 | -? | 0     | 0     | 0 | 1       |
| rs9332851    | 11 | 118381018 | T | C | -0.197 | 0.8441 | +  | 0     | 0.378 | 1 | 0.5387  |
| rs4938506    | 11 | 118205702 | A | G | -0.196 | 0.8448 | +  | -96.8 | 1.525 | 1 | 0.2169  |
| rs67851622   | 11 | 119314499 | G | C | -0.196 | 0.8448 | -? | 0     | 0     | 0 | 1       |
| rs735006     | 11 | 119317435 | G | A | -0.196 | 0.8448 | -? | 0     | 0     | 0 | 1       |
| rs10790237   | 11 | 117989944 | G | T | -0.196 | 0.8449 | -- | 0     | 0.001 | 1 | 0.9788  |
| rs11608077   | 11 | 119462854 | G | A | -0.196 | 0.8449 | -? | 0     | 0     | 0 | 1       |
| rs1169326    | 11 | 118945185 | A | G | 0.196  | 0.8449 | +  | 0     | 0     | 0 | 1       |
| rs1184902    | 11 | 118945337 | G | A | 0.196  | 0.8449 | +  | 0     | 0     | 0 | 1       |
| rs2846095    | 11 | 120645211 | T | C | 0.196  | 0.8449 | +  | 0     | 0     | 0 | 1       |
| rs1271978583 | 11 | 119427353 | G | C | 0.196  | 0.845  | +  | 0     | 0     | 0 | 1       |
| rs2663621    | 11 | 119427309 | C | T | 0.195  | 0.8452 | +  | 0     | 0     | 0 | 1       |
| rs10892515   | 11 | 119896745 | A | T | 0.195  | 0.8454 | +  | 0     | 0     | 0 | 1       |
| rs12421142   | 11 | 120039274 | T | C | 0.195  | 0.8454 | +  | 0     | 0     | 0 | 1       |
| rs2845657    | 11 | 119429083 | T | C | 0.195  | 0.8454 | +  | 0     | 0     | 0 | 1       |
| rs56161514   | 11 | 121060783 | A | C | -0.195 | 0.8454 | -? | 0     | 0     | 0 | 1       |
| rs59565858   | 11 | 118986456 | A | G | -0.195 | 0.8454 | -? | 0     | 0     | 0 | 1       |
| rs79138835   | 11 | 117045522 | T | G | 0.195  | 0.8454 | +  | 0     | 0     | 0 | 1       |
| rs11216069   | 11 | 116507795 | C | G | -0.195 | 0.8455 | -? | 0     | 0     | 0 | 1       |
| rs11607985   | 11 | 118029798 | G | C | -0.195 | 0.8456 | +  | 0     | 0.121 | 1 | 0.7278  |
| rs117083334  | 11 | 117252437 | G | A | 0.195  | 0.8457 | +  | 0     | 0     | 0 | 1       |
| rs470411     | 11 | 120012390 | G | C | -0.195 | 0.8457 | -? | 0     | 0     | 0 | 1       |
| rs508316     | 11 | 121085567 | C | A | -0.195 | 0.8457 | -? | 0     | 0     | 0 | 1       |
| rs12225133   | 11 | 117986722 | C | T | -0.194 | 0.8458 | -? | 0     | 0     | 0 | 1       |
| rs605742     | 11 | 119978743 | T | G | 0.194  | 0.846  | +  | 0     | 0     | 0 | 1       |
| rs625145     | 11 | 116727936 | T | A | -0.194 | 0.846  | -? | 0     | 0     | 0 | 1       |
| rs12362780   | 11 | 119762458 | A | C | 0.194  | 0.8461 | +  | 0     | 0     | 0 | 1       |
| rs595367     | 11 | 117227694 | C | T | 0.194  | 0.8463 | +  | 0     | 0     | 0 | 1       |
| rs871800     | 11 | 119485081 | C | G | -0.194 | 0.8463 | -? | 0     | 0     | 0 | 1       |
| rs11216391   | 11 | 117313136 | T | C | -0.194 | 0.8464 | -? | 0     | 0     | 0 | 1       |
| rs141076711  | 11 | 120873429 | T | G | 0.193  | 0.8467 | +  | 0     | 0     | 0 | 1       |
| rs1790476    | 11 | 120008957 | G | C | -0.193 | 0.847  | -? | 0     | 0     | 0 | 1       |
| rs189832363  | 11 | 121150291 | T | C | 0.193  | 0.847  | +  | 0     | 0     | 0 | 1       |
| rs61902684   | 11 | 120564824 | T | C | -0.193 | 0.847  | -? | 0     | 0     | 0 | 1       |
| rs11824135   | 11 | 116559553 | T | G | 0.193  | 0.8473 | +  | 0     | 0     | 0 | 1       |
| rs61903170   | 11 | 120855775 | C | T | -0.193 | 0.8473 | +  | 0     | 0.232 | 1 | 0.6302  |
| rs80259223   | 11 | 116924318 | A | G | 0.193  | 0.8473 | +  | 0     | 0     | 0 | 1       |
| rs11216503   | 11 | 117558989 | G | A | -0.192 | 0.8474 | -? | 0     | 0     | 0 | 1       |
| rs11216677   | 11 | 117882792 | T | C | 0.192  | 0.8475 | +  | 0     | 0     | 0 | 1       |
| rs4938380    | 11 | 117323076 | A | G | 0.192  | 0.8475 | +  | 0     | 0     | 0 | 1       |
| rs7106419    | 11 | 117590322 | G | T | 0.192  | 0.8475 | +  | 0     | 0     | 0 | 1       |
| rs722058     | 11 | 119949822 | A | G | -0.192 | 0.8476 | -? | 0     | 0     | 0 | 1       |
| rs11216748   | 11 | 117970689 | A | G | 0.192  | 0.8477 | +- | 0     | 0.154 | 1 | 0.6946  |
| rs183640608  | 11 | 116877361 | G | A | 0.192  | 0.8477 | +  | 0     | 0     | 0 | 1       |
| rs7131641    | 11 | 119312750 | C | G | -0.192 | 0.8478 | -? | 0     | 0     | 0 | 1       |
| rs78036667   | 11 | 117600506 | T | C | 0.192  | 0.8478 | +  | 0     | 0     | 0 | 1       |
| rs45625638   | 11 | 117021426 | C | G | 0.192  | 0.8479 | +  | 0     | 0     | 0 | 1       |

|             |    |           |   |   |        |        |   |       |       |   |         |
|-------------|----|-----------|---|---|--------|--------|---|-------|-------|---|---------|
| rs6589800   | 11 | 119971706 | C | A | 0.191  | 0.8482 | + | 0     | 0     | 0 | 1       |
| rs113586459 | 11 | 117610811 | C | A | 0.191  | 0.8483 | + | 0     | 0     | 0 | 1       |
| rs948027    | 11 | 120644424 | C | T | 0.191  | 0.8483 | + | 0     | 0     | 0 | 1       |
| rs60545357  | 11 | 118281418 | C | A | 0.191  | 0.8484 | - | 0     | 0.155 | 1 | 0.6935  |
| rs33984246  | 11 | 116660450 | G | A | 0.191  | 0.8486 | + | -29.5 | 2.317 | 1 | 0.128   |
| rs79212399  | 11 | 121100518 | T | G | -0.191 | 0.8487 | - | 0     | 0     | 0 | 1       |
| rs1806      | 11 | 118076004 | C | T | 0.191  | 0.8488 | + | 0     | 0     | 0 | 1       |
| rs17245796  | 11 | 120921962 | G | A | 0.19   | 0.849  | + | 0     | 0     | 0 | 1       |
| rs529482    | 11 | 119786235 | G | A | -0.19  | 0.8491 | - | 0     | 0     | 0 | 1       |
| rs72997349  | 11 | 118945502 | C | T | 0.19   | 0.8491 | + | 0     | 0     | 0 | 1       |
| rs61409027  | 11 | 120769478 | T | C | 0.19   | 0.8492 | + | 0     | 0     | 0 | 1       |
| rs67262752  | 11 | 118047776 | C | T | 0.19   | 0.8492 | + | 0     | 0.474 | 1 | 0.4912  |
| rs7121573   | 11 | 117729830 | A | G | 0.19   | 0.8495 | + | 0     | 0     | 0 | 1       |
| rs10892611  | 11 | 120551586 | T | C | -0.19  | 0.8496 | - | 0     | 0     | 0 | 1       |
| rs2298478   | 11 | 120984087 | G | C | -0.19  | 0.8496 | - | 0     | 0     | 0 | 1       |
| rs522098    | 11 | 116326686 | A | G | -0.189 | 0.8499 | - | 0     | 0     | 0 | 1       |
| rs56289161  | 11 | 116535703 | T | C | 0.189  | 0.8501 | + | 0     | 0     | 0 | 1       |
| rs56391092  | 11 | 120010550 | T | C | -0.189 | 0.8504 | - | 0     | 0     | 0 | 1       |
| rs3825055   | 11 | 118416073 | C | A | 0.188  | 0.8505 | + | 0     | 0.007 | 1 | 0.9352  |
| rs624463    | 11 | 117940612 | G | A | -0.188 | 0.8505 | - | 0     | 0     | 0 | 1       |
| rs654572    | 11 | 117940332 | C | T | -0.188 | 0.8505 | - | 0     | 0     | 0 | 1       |
| rs61209319  | 11 | 116537880 | A | C | 0.188  | 0.8508 | + | 0     | 0     | 0 | 1       |
| rs11216046  | 11 | 116492701 | T | G | -0.188 | 0.851  | - | 0     | 0     | 0 | 1       |
| rs12807172  | 11 | 120497794 | T | G | 0.188  | 0.851  | + | 0     | 0     | 0 | 1       |
| rs7120516   | 11 | 117292550 | C | G | 0.188  | 0.8511 | + | 0     | 0     | 0 | 1       |
| rs10466594  | 11 | 119454670 | C | T | -0.187 | 0.8513 | - | 0     | 0     | 0 | 1       |
| rs10892080  | 11 | 117035502 | A | G | 0.187  | 0.8513 | + | 0     | 0     | 0 | 1       |
| rs146204458 | 11 | 119782437 | G | A | -0.187 | 0.8513 | - | 0     | 0     | 0 | 1       |
| rs58164695  | 11 | 119691736 | T | C | 0.187  | 0.8513 | + | 0     | 0     | 0 | 1       |
| rs12271703  | 11 | 116266176 | G | A | 0.187  | 0.8514 | + | 0     | 0     | 0 | 1       |
| rs11216749  | 11 | 117970696 | C | T | 0.187  | 0.8515 | + | 0     | 0.152 | 1 | 0.6967  |
| rs1073634   | 11 | 119972642 | T | C | 0.187  | 0.8516 | + | 0     | 0     | 0 | 1       |
| rs1073636   | 11 | 119972448 | A | T | 0.187  | 0.8516 | + | 0     | 0     | 0 | 1       |
| rs45501598  | 11 | 118251980 | T | A | 0.187  | 0.8516 | + | 0     | 0.201 | 1 | 0.6537  |
| rs61906114  | 11 | 116557044 | C | G | 0.187  | 0.8518 | + | 0     | 0     | 0 | 1       |
| rs8924      | 11 | 117988784 | A | G | -0.187 | 0.8519 | - | 0     | 0.016 | 1 | 0.8998  |
| rs529623    | 11 | 117693255 | T | C | -0.187 | 0.852  | - | 0     | 0     | 0 | 1       |
| rs7934404   | 11 | 120193477 | A | G | -0.187 | 0.852  | - | 0     | 0     | 0 | 1       |
| rs7949987   | 11 | 121153421 | G | A | -0.186 | 0.8521 | - | 0     | 0     | 0 | 1       |
| rs55920307  | 11 | 120042846 | G | A | 0.186  | 0.8523 | + | 0     | 0     | 0 | 1       |
| rs61905081  | 11 | 116600564 | A | G | -0.186 | 0.8524 | + | -65   | 1.818 | 1 | 0.1776  |
| rs2000870   | 11 | 120539693 | G | C | 0.186  | 0.8525 | + | 0     | 0     | 0 | 1       |
| rs41510246  | 11 | 119836704 | A | G | -0.186 | 0.8525 | - | 0     | 0     | 0 | 1       |
| rs649451    | 11 | 119894303 | A | G | 0.186  | 0.8525 | + | 0     | 0     | 0 | 1       |
| rs74916845  | 11 | 119838589 | G | A | -0.186 | 0.8525 | - | 0     | 0     | 0 | 1       |
| rs75335512  | 11 | 121106642 | C | A | -0.186 | 0.8526 | - | 0     | 0     | 0 | 1       |
| rs80145448  | 11 | 121139014 | A | C | 0.186  | 0.8528 | + | 0     | 0     | 0 | 1       |
| rs55986402  | 11 | 117192701 | C | A | -0.185 | 0.853  | - | 0     | 0     | 0 | 1       |
| rs73587439  | 11 | 117644348 | A | G | -0.185 | 0.8531 | + | 24.4  | 3.966 | 1 | 0.04643 |
| rs7939747   | 11 | 117097009 | G | A | -0.185 | 0.8531 | - | 0     | 0     | 0 | 1       |
| rs61905307  | 11 | 117326269 | C | T | -0.185 | 0.8533 | - | 0     | 0     | 0 | 1       |
| rs11218059  | 11 | 120787231 | T | C | -0.185 | 0.8534 | + | 0     | 0.678 | 1 | 0.4102  |
| rs624736    | 11 | 119893208 | G | A | 0.185  | 0.8534 | + | 0     | 0     | 0 | 1       |
| rs13377199  | 11 | 116342446 | T | C | 0.185  | 0.8536 | + | 0     | 0     | 0 | 1       |
| rs77564141  | 11 | 119302513 | G | A | 0.184  | 0.854  | + | 0     | 0     | 0 | 1       |
| rs117986469 | 11 | 121075781 | A | C | 0.184  | 0.8541 | + | 0     | 0     | 0 | 1       |

|             |    |           |   |   |        |        |   |       |       |   |         |
|-------------|----|-----------|---|---|--------|--------|---|-------|-------|---|---------|
| rs12291024  | 11 | 116560667 | G | T | 0.184  | 0.8541 | + | 0     | 0     | 0 | 1       |
| rs7130303   | 11 | 117702115 | A | C | 0.184  | 0.8541 | + | 0     | 0     | 0 | 1       |
| rs7949366   | 11 | 119959585 | T | C | 0.184  | 0.8541 | + | 0     | 0     | 0 | 1       |
| rs61905078  | 11 | 116596309 | C | A | 0.184  | 0.8542 | + | -43   | 2.098 | 1 | 0.1475  |
| rs11216533  | 11 | 117628729 | A | C | -0.184 | 0.8543 | + | 15.5  | 3.549 | 1 | 0.05959 |
| rs2510146   | 11 | 119181674 | G | C | 0.184  | 0.8543 | + | 0     | 0     | 0 | 1       |
| rs11600005  | 11 | 119781758 | A | G | -0.184 | 0.8544 | - | 0     | 0     | 0 | 1       |
| rs55713675  | 11 | 116622722 | T | C | -0.183 | 0.8545 | + | -17.2 | 2.56  | 1 | 0.1096  |
| rs11216527  | 11 | 117620420 | C | T | 0.183  | 0.8546 | + | 0     | 0     | 0 | 1       |
| rs7925365   | 11 | 120637315 | G | T | -0.183 | 0.8548 | - | 0     | 0     | 0 | 1       |
| rs7948840   | 11 | 121098423 | G | A | -0.183 | 0.8548 | + | 0     | 0.069 | 1 | 0.7925  |
| rs6589801   | 11 | 119971987 | T | C | 0.183  | 0.8551 | + | 0     | 0     | 0 | 1       |
| rs596647    | 11 | 119367321 | A | C | 0.182  | 0.8552 | + | 0     | 0     | 0 | 1       |
| rs532107    | 11 | 116311508 | G | A | -0.182 | 0.8553 | - | 0     | 0     | 0 | 1       |
| rs56967930  | 11 | 117192528 | G | A | -0.182 | 0.8553 | - | 0     | 0     | 0 | 1       |
| rs112357006 | 11 | 117126493 | A | G | 0.182  | 0.8556 | + | 0     | 0     | 0 | 1       |
| rs12803171  | 11 | 117430426 | T | C | -0.182 | 0.8556 | - | 0     | 0     | 0 | 1       |
| rs10892517  | 11 | 119902255 | T | C | 0.182  | 0.8559 | + | 0     | 0     | 0 | 1       |
| rs3809040   | 11 | 117774829 | A | G | 0.182  | 0.8559 | + | 0     | 0     | 0 | 1       |
| rs61415784  | 11 | 116362957 | C | A | -0.182 | 0.8559 | - | 0     | 0     | 0 | 1       |
| rs11218105  | 11 | 120872976 | G | A | -0.181 | 0.856  | - | 0     | 0     | 0 | 1       |
| rs56224630  | 11 | 116627097 | A | G | -0.181 | 0.8561 | + | -6.1  | 2.826 | 1 | 0.09273 |
| rs71478236  | 11 | 116214668 | A | G | -0.181 | 0.8561 | - | 0     | 0     | 0 | 1       |
| rs76830818  | 11 | 117083831 | T | A | -0.181 | 0.8561 | - | 0     | 0     | 0 | 1       |
| rs10400366  | 11 | 117000955 | G | A | 0.181  | 0.8565 | + | 0     | 0     | 0 | 1       |
| rs12574404  | 11 | 116319329 | G | C | -0.181 | 0.8566 | - | 0     | 0     | 0 | 1       |
| rs11216675  | 11 | 117881937 | T | C | 0.181  | 0.8567 | + | 0     | 0     | 0 | 1       |
| rs79911534  | 11 | 118232332 | A | G | -0.181 | 0.8567 | + | 0     | 0.027 | 1 | 0.8703  |
| rs59176377  | 11 | 118419295 | A | G | 0.181  | 0.8568 | + | 0     | 0     | 1 | 0.9889  |
| rs61898294  | 11 | 120104292 | A | G | -0.18  | 0.8568 | - | 0     | 0     | 0 | 1       |
| rs12274046  | 11 | 116605070 | T | C | -0.18  | 0.8569 | + | -41.2 | 2.125 | 1 | 0.1449  |
| rs1079118   | 11 | 118258056 | A | G | 0.18   | 0.857  | + | 0     | 0.148 | 1 | 0.7003  |
| rs140575350 | 11 | 116646820 | G | C | -0.18  | 0.8571 | - | 0     | 0     | 0 | 1       |
| rs3133225   | 11 | 120624732 | A | G | 0.18   | 0.8571 | + | 0     | 0     | 0 | 1       |
| rs11606013  | 11 | 116568225 | T | G | 0.18   | 0.8573 | + | 0     | 0     | 0 | 1       |
| rs1177562   | 11 | 118949331 | T | C | 0.18   | 0.8573 | + | 0     | 0     | 0 | 1       |
| rs12225399  | 11 | 118480285 | C | G | 0.18   | 0.8573 | + | 0     | 0.13  | 1 | 0.7186  |
| rs7937973   | 11 | 117593097 | A | G | 0.18   | 0.8573 | + | 0     | 0     | 0 | 1       |
| rs12577147  | 11 | 119218648 | A | G | 0.179  | 0.8576 | + | 0     | 0     | 0 | 1       |
| rs66633871  | 11 | 116339980 | A | G | -0.179 | 0.8578 | - | 0     | 0     | 0 | 1       |
| rs10750126  | 11 | 117989990 | A | G | -0.179 | 0.8579 | - | 0     | 0.001 | 1 | 0.9727  |
| rs73003594  | 11 | 116300735 | A | G | 0.179  | 0.8579 | + | 0     | 0     | 0 | 1       |
| rs74424292  | 11 | 116501089 | T | A | 0.179  | 0.8579 | + | 0     | 0     | 0 | 1       |
| rs76055915  | 11 | 116501072 | T | C | 0.179  | 0.8579 | + | 0     | 0     | 0 | 1       |
| rs61898296  | 11 | 120105300 | A | G | 0.179  | 0.858  | + | 0     | 0     | 0 | 1       |
| rs11216105  | 11 | 116577441 | G | A | 0.178  | 0.8584 | + | 0     | 0     | 0 | 1       |
| rs12788247  | 11 | 120954793 | G | A | -0.178 | 0.8585 | - | 0     | 0     | 0 | 1       |
| rs60837962  | 11 | 118438448 | T | A | 0.178  | 0.8585 | + | 0     | 0.037 | 1 | 0.8476  |
| rs476983    | 11 | 117215605 | T | C | -0.178 | 0.8586 | - | 0     | 0     | 0 | 1       |
| rs59027088  | 11 | 119445108 | T | C | 0.178  | 0.8586 | + | 0     | 0     | 0 | 1       |
| rs73584223  | 11 | 119444694 | A | G | 0.178  | 0.8586 | + | 0     | 0     | 0 | 1       |
| rs603858    | 11 | 117378713 | C | G | -0.178 | 0.8587 | - | 0     | 0     | 0 | 1       |
| rs10431083  | 11 | 117898155 | A | G | 0.178  | 0.8589 | + | 0     | 0     | 0 | 1       |
| rs12223288  | 11 | 117898084 | G | A | 0.178  | 0.8589 | + | 0     | 0     | 0 | 1       |
| rs192508986 | 11 | 117898042 | T | C | 0.178  | 0.8589 | + | 0     | 0     | 0 | 1       |
| rs74430235  | 11 | 117556948 | A | G | -0.178 | 0.8589 | - | 0     | 0     | 0 | 1       |

|             |    |           |   |   |        |        |   |        |       |   |         |
|-------------|----|-----------|---|---|--------|--------|---|--------|-------|---|---------|
| rs76628593  | 11 | 117594288 | T | G | 0.178  | 0.8589 | + | 0      | 0     | 0 | 1       |
| rs77047087  | 11 | 117594170 | A | G | 0.178  | 0.8589 | + | 0      | 0     | 0 | 1       |
| rs78437760  | 11 | 117593858 | G | T | 0.178  | 0.8589 | + | 0      | 0     | 0 | 1       |
| rs78908794  | 11 | 116638854 | C | T | 0.178  | 0.8589 | + | -88.8  | 1.589 | 1 | 0.2075  |
| rs12282602  | 11 | 117628810 | G | A | -0.178 | 0.859  | + | 15.8   | 3.562 | 1 | 0.05912 |
| rs595377    | 11 | 119898379 | T | C | 0.178  | 0.859  | + | 0      | 0     | 0 | 1       |
| rs4142640   | 11 | 117604207 | A | G | 0.178  | 0.8591 | + | 0      | 0     | 0 | 1       |
| rs11216059  | 11 | 116501987 | A | C | 0.177  | 0.8592 | + | 0      | 0     | 0 | 1       |
| rs560789    | 11 | 117228892 | G | A | -0.177 | 0.8592 | - | 0      | 0     | 0 | 1       |
| rs77746497  | 11 | 117597810 | A | G | 0.177  | 0.8592 | + | 0      | 0     | 0 | 1       |
| rs79506234  | 11 | 117596635 | T | C | 0.177  | 0.8592 | + | 0      | 0     | 0 | 1       |
| rs117680585 | 11 | 117048367 | T | C | 0.177  | 0.8593 | + | 0      | 0     | 0 | 1       |
| rs74894672  | 11 | 120090711 | A | G | -0.177 | 0.8593 | - | 0      | 0     | 0 | 1       |
| rs10892116  | 11 | 117325448 | T | C | -0.177 | 0.8594 | - | 0      | 0     | 0 | 1       |
| rs117865451 | 11 | 116780568 | C | T | -0.177 | 0.8594 | - | 0      | 0     | 0 | 1       |
| rs477890    | 11 | 117335074 | T | A | -0.177 | 0.8596 | - | 0      | 0     | 0 | 1       |
| rs640421    | 11 | 117941898 | T | C | -0.177 | 0.8596 | - | 0      | 0     | 0 | 1       |
| rs652030    | 11 | 117942125 | C | T | -0.177 | 0.8596 | - | 0      | 0     | 0 | 1       |
| rs4936532   | 11 | 120493360 | A | G | 0.177  | 0.8598 | + | 0      | 0     | 0 | 1       |
| rs555255    | 11 | 119701127 | G | A | 0.177  | 0.8598 | + | 0      | 0     | 0 | 1       |
| rs79537444  | 11 | 117643958 | T | C | -0.177 | 0.8598 | + | 24.7   | 3.985 | 1 | 0.0459  |
| rs12294242  | 11 | 116346978 | T | C | 0.176  | 0.8601 | + | 0      | 0     | 0 | 1       |
| rs68137714  | 11 | 117025357 | G | A | 0.176  | 0.8602 | + | 0      | 0     | 0 | 1       |
| rs7350481   | 11 | 116586283 | T | C | -0.176 | 0.8602 | + | -18.7  | 2.528 | 1 | 0.1118  |
| rs7952087   | 11 | 119945046 | T | C | -0.176 | 0.8602 | - | 0      | 0     | 0 | 1       |
| rs61905116  | 11 | 116649538 | G | A | -0.176 | 0.8603 | + | -107.4 | 1.447 | 1 | 0.2291  |
| rs55820322  | 11 | 117998834 | C | A | -0.176 | 0.8604 | - | 0      | 0     | 0 | 1       |
| rs144198120 | 11 | 117309079 | T | C | -0.176 | 0.8605 | - | 0      | 0     | 0 | 1       |
| rs1367306   | 11 | 121142356 | T | A | 0.175  | 0.8609 | + | 0      | 0     | 0 | 1       |
| rs1944516   | 11 | 120877786 | T | C | -0.175 | 0.8609 | - | 0      | 0     | 0 | 1       |
| rs897837    | 11 | 117261488 | G | C | 0.175  | 0.8609 | + | 0      | 0     | 0 | 1       |
| rs11216666  | 11 | 117876035 | C | T | 0.175  | 0.8611 | + | 0      | 0     | 0 | 1       |
| rs10750158  | 11 | 119443669 | A | C | -0.175 | 0.8613 | - | 0      | 0     | 0 | 1       |
| rs73005072  | 11 | 121065345 | A | C | -0.174 | 0.8615 | - | 0      | 0     | 0 | 1       |
| rs113749645 | 11 | 120868233 | A | T | -0.174 | 0.8616 | - | 0      | 0     | 0 | 1       |
| rs479991    | 11 | 117696958 | C | T | 0.174  | 0.8618 | + | 0      | 0     | 0 | 1       |
| rs61898289  | 11 | 120093745 | A | G | 0.174  | 0.8618 | + | 0      | 0     | 0 | 1       |
| rs11216385  | 11 | 117307219 | T | C | 0.174  | 0.8619 | + | 0      | 0     | 0 | 1       |
| rs77649044  | 11 | 116501053 | C | T | 0.174  | 0.862  | + | 0      | 0     | 0 | 1       |
| rs586053    | 11 | 118020568 | A | G | -0.174 | 0.8621 | + | 0      | 0.855 | 1 | 0.3551  |
| rs7124934   | 11 | 119564781 | G | A | -0.174 | 0.8622 | - | 0      | 0     | 0 | 1       |
| rs1473324   | 11 | 116821918 | G | T | 0.173  | 0.8623 | + | 0      | 0     | 0 | 1       |
| rs68097885  | 11 | 118596444 | A | G | -0.173 | 0.8623 | + | 0      | 0.32  | 1 | 0.5718  |
| rs11216029  | 11 | 116465680 | T | G | 0.173  | 0.8624 | + | 0      | 0     | 0 | 1       |
| rs11608173  | 11 | 116568364 | A | T | 0.173  | 0.8624 | + | 0      | 0     | 0 | 1       |
| rs2508489   | 11 | 120099658 | A | G | -0.173 | 0.8624 | - | 0      | 0     | 0 | 1       |
| rs12417339  | 11 | 121110311 | A | G | -0.173 | 0.8625 | - | 0      | 0     | 0 | 1       |
| rs587348    | 11 | 119895515 | T | C | 0.173  | 0.8626 | + | 0      | 0     | 0 | 1       |
| rs11217682  | 11 | 119961707 | G | A | 0.173  | 0.8628 | + | 0      | 0     | 0 | 1       |
| rs573052    | 11 | 116321980 | A | G | -0.173 | 0.8629 | - | 0      | 0     | 0 | 1       |
| rs12291995  | 11 | 117587353 | C | T | 0.173  | 0.863  | + | 0      | 0     | 0 | 1       |
| rs56152188  | 11 | 119312046 | C | T | -0.173 | 0.863  | - | 0      | 0     | 0 | 1       |
| rs67000349  | 11 | 117842706 | G | A | 0.172  | 0.8631 | + | 0      | 0     | 0 | 1       |
| rs11216592  | 11 | 117733364 | G | A | 0.172  | 0.8632 | + | 0      | 0     | 0 | 1       |
| rs61901460  | 11 | 121194035 | G | C | -0.172 | 0.8632 | - | 0      | 0     | 0 | 1       |
| rs655157    | 11 | 117942848 | T | G | -0.172 | 0.8632 | - | 0      | 0     | 0 | 1       |

|             |    |           |   |   |        |        |    |   |       |   |        |
|-------------|----|-----------|---|---|--------|--------|----|---|-------|---|--------|
| rs2077173   | 11 | 118492591 | A | G | -0.172 | 0.8633 | -+ | 0 | 0.551 | 1 | 0.4579 |
| rs75322037  | 11 | 116479338 | G | A | -0.172 | 0.8634 | -? | 0 | 0     | 0 | 1      |
| rs4936423   | 11 | 117992718 | C | G | -0.172 | 0.8637 | -+ | 0 | 0.049 | 1 | 0.8249 |
| rs12361479  | 11 | 117555727 | T | C | -0.172 | 0.8638 | -? | 0 | 0     | 0 | 1      |
| rs7114201   | 11 | 120050113 | A | T | 0.172  | 0.8638 | +? | 0 | 0     | 0 | 1      |
| rs35287658  | 11 | 119447044 | A | G | 0.171  | 0.8639 | +? | 0 | 0     | 0 | 1      |
| rs4938336   | 11 | 116948442 | G | A | 0.171  | 0.8639 | +? | 0 | 0     | 0 | 1      |
| rs3741319   | 11 | 118415848 | C | A | 0.171  | 0.864  | ++ | 0 | 0.003 | 1 | 0.9596 |
| rs3741320   | 11 | 118415847 | C | G | 0.171  | 0.864  | ++ | 0 | 0.003 | 1 | 0.9596 |
| rs11216512  | 11 | 117584793 | G | C | 0.171  | 0.8641 | +? | 0 | 0     | 0 | 1      |
| rs2187182   | 11 | 117584761 | T | G | 0.171  | 0.8641 | +? | 0 | 0     | 0 | 1      |
| rs2187183   | 11 | 117584740 | A | G | 0.171  | 0.8641 | +? | 0 | 0     | 0 | 1      |
| rs4245171   | 11 | 117585977 | A | G | 0.171  | 0.8641 | +? | 0 | 0     | 0 | 1      |
| rs4245172   | 11 | 117585981 | C | T | 0.171  | 0.8641 | +? | 0 | 0     | 0 | 1      |
| rs4245173   | 11 | 117586129 | T | C | 0.171  | 0.8641 | +? | 0 | 0     | 0 | 1      |
| rs4255570   | 11 | 117585918 | C | T | 0.171  | 0.8641 | +? | 0 | 0     | 0 | 1      |
| rs4359247   | 11 | 117585641 | G | C | 0.171  | 0.8641 | +? | 0 | 0     | 0 | 1      |
| rs4936396   | 11 | 117585035 | A | G | 0.171  | 0.8641 | +? | 0 | 0     | 0 | 1      |
| rs4936397   | 11 | 117585370 | G | A | 0.171  | 0.8641 | +? | 0 | 0     | 0 | 1      |
| rs4938427   | 11 | 117585030 | A | G | 0.171  | 0.8641 | +? | 0 | 0     | 0 | 1      |
| rs4938429   | 11 | 117585338 | C | A | 0.171  | 0.8641 | +? | 0 | 0     | 0 | 1      |
| rs4938430   | 11 | 117586178 | C | G | 0.171  | 0.8641 | +? | 0 | 0     | 0 | 1      |
| rs7930615   | 11 | 117585523 | G | A | 0.171  | 0.8641 | +? | 0 | 0     | 0 | 1      |
| rs79078907  | 11 | 117557022 | T | C | -0.171 | 0.8644 | -? | 0 | 0     | 0 | 1      |
| rs487611    | 11 | 116330989 | C | G | 0.171  | 0.8645 | +? | 0 | 0     | 0 | 1      |
| rs680472    | 11 | 119900629 | G | C | -0.171 | 0.8646 | -? | 0 | 0     | 0 | 1      |
| rs144638086 | 11 | 117659186 | T | C | 0.17   | 0.8647 | +? | 0 | 0     | 0 | 1      |
| rs11216061  | 11 | 116502752 | C | T | 0.17   | 0.8648 | +? | 0 | 0     | 0 | 1      |
| rs10892383  | 11 | 119405750 | T | C | -0.17  | 0.865  | -? | 0 | 0     | 0 | 1      |
| rs12284089  | 11 | 118058542 | T | C | 0.17   | 0.865  | +- | 0 | 0.422 | 1 | 0.5158 |
| rs71484153  | 11 | 119792443 | C | T | 0.17   | 0.865  | +? | 0 | 0     | 0 | 1      |
| rs10892249  | 11 | 118507068 | C | T | -0.17  | 0.8651 | -+ | 0 | 0.158 | 1 | 0.6906 |
| rs73020459  | 11 | 117766606 | T | C | -0.17  | 0.8654 | -? | 0 | 0     | 0 | 1      |
| rs652346    | 11 | 117216599 | T | C | 0.169  | 0.8655 | +? | 0 | 0     | 0 | 1      |
| rs11823013  | 11 | 116839535 | C | T | 0.169  | 0.8656 | +? | 0 | 0     | 0 | 1      |
| rs73613959  | 11 | 118263054 | A | G | 0.169  | 0.8657 | -+ | 0 | 0.125 | 1 | 0.7238 |
| rs649880    | 11 | 121095030 | C | G | -0.169 | 0.8658 | -+ | 0 | 0.065 | 1 | 0.7987 |
| rs1158260   | 11 | 116356225 | T | C | 0.169  | 0.8659 | +? | 0 | 0     | 0 | 1      |
| rs17547501  | 11 | 119315417 | A | G | -0.169 | 0.866  | -? | 0 | 0     | 0 | 1      |
| rs55845693  | 11 | 119314637 | C | T | -0.169 | 0.866  | -? | 0 | 0     | 0 | 1      |
| rs61901262  | 11 | 119312851 | T | C | -0.169 | 0.866  | -? | 0 | 0     | 0 | 1      |
| rs61901263  | 11 | 119313221 | T | C | -0.169 | 0.866  | -? | 0 | 0     | 0 | 1      |
| rs61901265  | 11 | 119315316 | A | G | -0.169 | 0.866  | -? | 0 | 0     | 0 | 1      |
| rs657118    | 11 | 117954081 | G | A | 0.169  | 0.866  | +? | 0 | 0     | 0 | 1      |
| rs113770024 | 11 | 117685752 | A | G | -0.169 | 0.8661 | -? | 0 | 0     | 0 | 1      |
| rs11217646  | 11 | 119903119 | G | A | 0.168  | 0.8664 | +? | 0 | 0     | 0 | 1      |
| rs61903732  | 11 | 117193254 | G | A | 0.168  | 0.8665 | +? | 0 | 0     | 0 | 1      |
| rs11217640  | 11 | 119895939 | C | T | 0.168  | 0.8666 | +? | 0 | 0     | 0 | 1      |
| rs1473327   | 11 | 116823996 | T | A | 0.168  | 0.8666 | +? | 0 | 0     | 0 | 1      |
| rs11603616  | 11 | 118496066 | A | G | -0.168 | 0.8667 | -+ | 0 | 0.563 | 1 | 0.4529 |
| rs11217317  | 11 | 119428144 | T | C | -0.168 | 0.8668 | -? | 0 | 0     | 0 | 1      |
| rs11827322  | 11 | 117585424 | T | C | 0.168  | 0.8668 | +? | 0 | 0     | 0 | 1      |
| rs7928525   | 11 | 117118712 | T | A | -0.167 | 0.867  | -? | 0 | 0     | 0 | 1      |
| rs12803024  | 11 | 117430389 | G | C | -0.167 | 0.8671 | -? | 0 | 0     | 0 | 1      |
| rs144502429 | 11 | 119820957 | T | C | -0.167 | 0.8673 | -? | 0 | 0     | 0 | 1      |
| rs1075790   | 11 | 119983919 | A | C | -0.167 | 0.8676 | -? | 0 | 0     | 0 | 1      |

|              |    |           |   |   |        |        |    |      |       |   |         |
|--------------|----|-----------|---|---|--------|--------|----|------|-------|---|---------|
| rs61270867   | 11 | 116499500 | G | A | -0.167 | 0.8676 | -? | 0    | 0     | 0 | 1       |
| rs2735181    | 11 | 117009789 | C | T | 0.167  | 0.8677 | +? | 0    | 0     | 0 | 1       |
| rs55975161   | 11 | 117383716 | A | G | 0.167  | 0.8677 | +? | 0    | 0     | 0 | 1       |
| rs673351     | 11 | 120854938 | C | G | -0.167 | 0.8677 | -+ | 0    | 0.218 | 1 | 0.6408  |
| rs11217344   | 11 | 119468889 | A | G | 0.166  | 0.8678 | +? | 0    | 0     | 0 | 1       |
| rs12805851   | 11 | 116816884 | T | C | 0.166  | 0.8678 | +? | 0    | 0     | 0 | 1       |
| rs571001     | 11 | 118500173 | T | C | -0.166 | 0.8678 | -+ | 0    | 0.554 | 1 | 0.4569  |
| rs10790392   | 11 | 120542320 | A | G | 0.166  | 0.8679 | +? | 0    | 0     | 0 | 1       |
| rs36086368   | 11 | 117741853 | C | T | -0.166 | 0.8679 | -? | 0    | 0     | 0 | 1       |
| rs79807999   | 11 | 117554355 | G | T | -0.166 | 0.8679 | -? | 0    | 0     | 0 | 1       |
| rs11216030   | 11 | 116465734 | T | C | 0.166  | 0.868  | +? | 0    | 0     | 0 | 1       |
| rs143049161  | 11 | 117747629 | T | C | 0.166  | 0.868  | +? | 0    | 0     | 0 | 1       |
| rs7938843    | 11 | 119972861 | T | G | 0.166  | 0.868  | +? | 0    | 0     | 0 | 1       |
| rs12365185   | 11 | 119951870 | G | A | 0.166  | 0.8681 | +? | 0    | 0     | 0 | 1       |
| rs59931457   | 11 | 117528867 | A | G | 0.166  | 0.8681 | -+ | 0    | 0.994 | 1 | 0.3189  |
| rs67307131   | 11 | 118480223 | C | T | 0.166  | 0.8681 | +- | 0    | 0.159 | 1 | 0.6901  |
| rs12419204   | 11 | 118497402 | A | T | -0.166 | 0.8682 | -+ | 0    | 0.553 | 1 | 0.457   |
| rs2075548    | 11 | 117070927 | A | G | 0.166  | 0.8682 | +? | 0    | 0     | 0 | 1       |
| rs12289135   | 11 | 121085338 | C | T | -0.166 | 0.8684 | -? | 0    | 0     | 0 | 1       |
| rs80318512   | 11 | 121084717 | A | G | -0.166 | 0.8684 | -? | 0    | 0     | 0 | 1       |
| rs624717     | 11 | 119898183 | G | T | 0.165  | 0.8686 | +? | 0    | 0     | 0 | 1       |
| rs12296014   | 11 | 117628972 | A | G | -0.165 | 0.8687 | +- | 16.4 | 3.589 | 1 | 0.05818 |
| rs1876793    | 11 | 119444330 | T | C | -0.165 | 0.8687 | -? | 0    | 0     | 0 | 1       |
| rs7924895    | 11 | 117991034 | G | A | -0.165 | 0.8687 | -+ | 0    | 0.045 | 1 | 0.8315  |
| rs7946574    | 11 | 119666454 | T | C | -0.165 | 0.8687 | -? | 0    | 0     | 0 | 1       |
| rs618265     | 11 | 120028701 | A | G | -0.165 | 0.8688 | -? | 0    | 0     | 0 | 1       |
| rs7948804    | 11 | 120642807 | C | T | 0.165  | 0.8688 | +? | 0    | 0     | 0 | 1       |
| rs639484     | 11 | 119882063 | T | C | 0.165  | 0.869  | +? | 0    | 0     | 0 | 1       |
| rs494722     | 11 | 117216603 | T | A | 0.165  | 0.8691 | +? | 0    | 0     | 0 | 1       |
| rs531410     | 11 | 121094411 | A | T | -0.165 | 0.8691 | -+ | 0    | 0.064 | 1 | 0.8006  |
| rs10892636   | 11 | 120768404 | G | A | 0.165  | 0.8693 | +? | 0    | 0     | 0 | 1       |
| rs35101469   | 11 | 120550222 | G | T | -0.165 | 0.8693 | -? | 0    | 0     | 0 | 1       |
| rs10790199   | 11 | 117530473 | A | G | 0.164  | 0.8694 | +? | 0    | 0     | 0 | 1       |
| rs11216064   | 11 | 116502823 | C | G | 0.164  | 0.8694 | +? | 0    | 0     | 0 | 1       |
| rs17520254   | 11 | 116665553 | G | C | -0.164 | 0.8696 | +- | 0    | 0.157 | 1 | 0.6922  |
| rs11217507   | 11 | 119662942 | G | T | -0.164 | 0.8698 | -? | 0    | 0     | 0 | 1       |
| rs2511023    | 11 | 120009145 | A | G | 0.164  | 0.87   | +? | 0    | 0     | 0 | 1       |
| rs61903814   | 11 | 117510157 | A | G | -0.164 | 0.87   | -? | 0    | 0     | 0 | 1       |
| rs11216812   | 11 | 118071762 | A | G | 0.164  | 0.8701 | -+ | 0    | 0.506 | 1 | 0.4768  |
| rs11574653   | 11 | 119294290 | G | A | -0.163 | 0.8705 | -? | 0    | 0     | 0 | 1       |
| rs3138088    | 11 | 119293441 | G | A | -0.163 | 0.8705 | -? | 0    | 0     | 0 | 1       |
| rs3138089    | 11 | 119293397 | A | G | -0.163 | 0.8705 | -? | 0    | 0     | 0 | 1       |
| rs11216834   | 11 | 118122077 | C | T | -0.163 | 0.8707 | -+ | 0    | 0.17  | 1 | 0.68    |
| rs4936428    | 11 | 118187511 | T | C | -0.163 | 0.8707 | +- | 0    | 0.182 | 1 | 0.6696  |
| rs35705701   | 11 | 117693413 | A | G | 0.163  | 0.8708 | +? | 0    | 0     | 0 | 1       |
| rs480101     | 11 | 116314402 | T | C | 0.163  | 0.8708 | +? | 0    | 0     | 0 | 1       |
| rs117939457  | 11 | 120097897 | T | A | 0.163  | 0.8709 | +? | 0    | 0     | 0 | 1       |
| rs139060345  | 11 | 118295001 | C | T | -0.163 | 0.8709 | -? | 0    | 0     | 0 | 1       |
| rs4528369    | 11 | 116416716 | T | G | 0.163  | 0.8709 | +? | 0    | 0     | 0 | 1       |
| rs570952     | 11 | 118500193 | C | T | -0.163 | 0.8709 | -+ | 0    | 0.55  | 1 | 0.4582  |
| rs638997     | 11 | 117941554 | A | G | -0.163 | 0.8709 | -? | 0    | 0     | 0 | 1       |
| rs10892565   | 11 | 120235560 | C | T | 0.162  | 0.871  | +? | 0    | 0     | 0 | 1       |
| rs7103327    | 11 | 119443362 | T | C | 0.162  | 0.871  | +? | 0    | 0     | 0 | 1       |
| rs1304536246 | 11 | 117314320 | T | C | 0.162  | 0.8712 | +? | 0    | 0     | 0 | 1       |
| rs7103569    | 11 | 120764218 | G | A | -0.162 | 0.8713 | -? | 0    | 0     | 0 | 1       |
| rs11828506   | 11 | 117233427 | T | C | 0.162  | 0.8714 | +? | 0    | 0     | 0 | 1       |

|              |    |           |   |   |        |        |   |       |        |   |           |
|--------------|----|-----------|---|---|--------|--------|---|-------|--------|---|-----------|
| rs61905681   | 11 | 116836209 | C | A | 0.162  | 0.8715 | + | 0     | 0      | 0 | 1         |
| rs7106772    | 11 | 117237186 | A | G | 0.162  | 0.8716 | + | 0     | 0      | 0 | 1         |
| rs7109766    | 11 | 117244606 | T | A | 0.162  | 0.8716 | + | 0     | 0      | 0 | 1         |
| rs76344095   | 11 | 117244291 | T | C | 0.162  | 0.8716 | + | 0     | 0      | 0 | 1         |
| rs78406883   | 11 | 117253230 | T | C | 0.162  | 0.8716 | + | 0     | 0      | 0 | 1         |
| rs673346     | 11 | 120854936 | G | A | -0.162 | 0.8717 | - | 0     | 0.215  | 1 | 0.6429    |
| rs11217309   | 11 | 119412000 | T | C | 0.161  | 0.8718 | + | 0     | 0      | 0 | 1         |
| rs11824358   | 11 | 116354937 | T | C | -0.161 | 0.8718 | - | 0     | 0      | 0 | 1         |
| rs11826857   | 11 | 116354930 | C | T | -0.161 | 0.8718 | - | 0     | 0      | 0 | 1         |
| rs4375449    | 11 | 119406292 | A | G | -0.161 | 0.8718 | - | 0     | 0      | 0 | 1         |
| rs675647     | 11 | 120018743 | A | G | -0.161 | 0.8718 | - | 0     | 0      | 0 | 1         |
| rs7120565    | 11 | 117042949 | T | C | 0.161  | 0.8718 | + | 0     | 0      | 0 | 1         |
| rs511011     | 11 | 116482895 | C | T | 0.161  | 0.8719 | + | 0     | 0      | 0 | 1         |
| rs10790345   | 11 | 119654053 | G | A | 0.161  | 0.872  | + | 0     | 0      | 0 | 1         |
| rs116088536  | 11 | 119884982 | G | C | 0.161  | 0.872  | + | 0     | 0      | 0 | 1         |
| rs545613     | 11 | 116481221 | C | T | 0.161  | 0.872  | + | 0     | 0      | 0 | 1         |
| rs117047926  | 11 | 119804674 | T | C | -0.161 | 0.8722 | - | 0     | 0      | 0 | 1         |
| rs117933040  | 11 | 117049508 | G | A | 0.161  | 0.8722 | + | 0     | 0      | 0 | 1         |
| rs73018318   | 11 | 117307306 | T | G | 0.161  | 0.8723 | + | 0     | 0      | 0 | 1         |
| rs2846099    | 11 | 120650611 | T | A | 0.161  | 0.8724 | + | 0     | 0      | 0 | 1         |
| rs60583202   | 11 | 116596464 | A | G | -0.16  | 0.8725 | - | -77.3 | 1.692  | 1 | 0.1933    |
| rs653478     | 11 | 121087285 | A | T | -0.16  | 0.8725 | - | 0     | 0      | 0 | 1         |
| rs473343     | 11 | 117408156 | C | G | -0.16  | 0.8726 | - | 0     | 0      | 0 | 1         |
| rs61059752   | 11 | 118246071 | A | C | 0.16   | 0.8727 | - | 0     | 0.114  | 1 | 0.7359    |
| rs1027636222 | 11 | 117587085 | G | A | 0.16   | 0.8728 | + | 0     | 0      | 0 | 1         |
| rs12361273   | 11 | 116384580 | T | C | 0.16   | 0.8728 | + | 0     | 0      | 0 | 1         |
| rs527534     | 11 | 117689549 | T | G | -0.16  | 0.8728 | - | 0     | 0      | 0 | 1         |
| rs1982011    | 11 | 121154437 | G | A | -0.16  | 0.8729 | - | 0     | 0      | 0 | 1         |
| rs61906113   | 11 | 116556912 | T | C | 0.16   | 0.8732 | + | 0     | 0      | 0 | 1         |
| rs11216706   | 11 | 117897056 | G | T | 0.159  | 0.8735 | + | 0     | 0      | 0 | 1         |
| rs11216707   | 11 | 117897184 | G | A | 0.159  | 0.8735 | + | 0     | 0      | 0 | 1         |
| rs1317544    | 11 | 118006930 | C | T | 0.159  | 0.8736 | + | 0     | 0      | 0 | 1         |
| rs140763307  | 11 | 117472044 | G | A | -0.159 | 0.8736 | - | 0     | 0      | 0 | 1         |
| rs11216814   | 11 | 118071857 | G | A | 0.159  | 0.8737 | - | 0     | 0.508  | 1 | 0.476     |
| rs35199514   | 11 | 120454925 | C | T | -0.159 | 0.874  | - | 0     | 0      | 0 | 1         |
| rs3138090    | 11 | 119293216 | A | C | -0.158 | 0.8741 | - | 0     | 0      | 0 | 1         |
| rs78559460   | 11 | 117730777 | C | A | -0.158 | 0.8743 | - | 0     | 0      | 0 | 1         |
| rs74398561   | 11 | 118233634 | G | A | 0.158  | 0.8745 | - | 7.9   | 3.257  | 1 | 0.07114   |
| rs75202546   | 11 | 116961819 | A | G | -0.158 | 0.8747 | - | 75.7  | 12.322 | 1 | 0.0004476 |
| rs12289284   | 11 | 116338814 | A | G | -0.158 | 0.8748 | - | 0     | 0      | 0 | 1         |
| rs595969     | 11 | 119890372 | G | C | -0.157 | 0.8751 | - | 0     | 0      | 0 | 1         |
| rs4938788    | 11 | 120042081 | A | G | 0.157  | 0.8752 | + | 0     | 0      | 0 | 1         |
| rs1380377167 | 11 | 120947058 | A | T | 0.157  | 0.8753 | + | 0     | 0      | 0 | 1         |
| rs2845656    | 11 | 119429139 | C | T | 0.157  | 0.8753 | + | 0     | 0      | 0 | 1         |
| rs674352     | 11 | 120855192 | T | C | -0.157 | 0.8753 | - | 0     | 0.213  | 1 | 0.6448    |
| rs12292816   | 11 | 121072114 | T | G | -0.157 | 0.8754 | - | 0     | 0      | 0 | 1         |
| rs7928275    | 11 | 117991805 | A | G | -0.157 | 0.8754 | - | 0     | 0.044  | 1 | 0.8339    |
| rs7943311    | 11 | 117991817 | T | G | -0.157 | 0.8754 | - | 0     | 0.044  | 1 | 0.8339    |
| rs10790235   | 11 | 117977723 | G | A | -0.157 | 0.8755 | - | 0     | 0      | 0 | 1         |
| rs12224951   | 11 | 120551964 | T | C | -0.156 | 0.8757 | - | 0     | 0      | 0 | 1         |
| rs12792820   | 11 | 120055403 | A | T | -0.156 | 0.8758 | - | 0     | 0      | 0 | 1         |
| rs17519079   | 11 | 116629153 | A | G | 0.156  | 0.8758 | + | 0     | 0      | 0 | 1         |
| rs79552834   | 11 | 116953338 | C | G | -0.156 | 0.8759 | - | 72.5  | 10.924 | 1 | 0.0009494 |
| rs56134734   | 11 | 116833055 | A | G | 0.156  | 0.8763 | + | 0     | 0      | 0 | 1         |
| rs61905677   | 11 | 116833655 | G | T | 0.156  | 0.8763 | + | 0     | 0      | 0 | 1         |
| rs61905678   | 11 | 116834785 | T | C | 0.156  | 0.8763 | + | 0     | 0      | 0 | 1         |

|             |    |           |   |   |        |        |    |        |       |   |         |
|-------------|----|-----------|---|---|--------|--------|----|--------|-------|---|---------|
| rs61905680  | 11 | 116836031 | A | G | 0.156  | 0.8763 | +  | 0      | 0     | 0 | 1       |
| rs7929887   | 11 | 118428791 | G | A | 0.156  | 0.8763 | ++ | 0      | 0.007 | 1 | 0.9328  |
| rs4936363   | 11 | 116972935 | T | C | 0.155  | 0.8765 | +  | 0      | 0     | 0 | 1       |
| rs571445    | 11 | 118987971 | G | A | 0.155  | 0.8765 | +  | 0      | 0     | 0 | 1       |
| rs7110874   | 11 | 119564842 | C | T | 0.155  | 0.8765 | +  | 0      | 0     | 0 | 1       |
| rs7947704   | 11 | 119412210 | T | C | 0.155  | 0.8766 | +  | 0      | 0     | 0 | 1       |
| rs12225221  | 11 | 116438555 | T | C | 0.155  | 0.8767 | -  | 0      | 0.18  | 1 | 0.6715  |
| rs111901638 | 11 | 116959848 | A | G | 0.155  | 0.8768 | +  | 0      | 0     | 0 | 1       |
| rs591592    | 11 | 116713566 | C | T | -0.155 | 0.8768 | -  | 0      | 0     | 0 | 1       |
| rs632153    | 11 | 116710239 | T | G | -0.155 | 0.8769 | +  | 26.3   | 4.07  | 1 | 0.04364 |
| rs1056136   | 11 | 117120998 | G | T | -0.155 | 0.8771 | -  | 0      | 0     | 0 | 1       |
| rs34089864  | 11 | 116660768 | A | G | 0.155  | 0.8771 | +  | -85.2  | 1.62  | 1 | 0.2031  |
| rs605833    | 11 | 119969700 | C | T | 0.155  | 0.8771 | +  | 0      | 0     | 0 | 1       |
| rs141740187 | 11 | 116637677 | T | G | 0.154  | 0.8772 | +  | -92.9  | 1.555 | 1 | 0.2123  |
| rs11216830  | 11 | 118115147 | A | G | -0.154 | 0.8774 | -  | 0      | 0.16  | 1 | 0.6889  |
| rs2102405   | 11 | 116348168 | G | A | 0.154  | 0.8774 | +  | 0      | 0     | 0 | 1       |
| rs3938035   | 11 | 116348151 | G | A | 0.154  | 0.8774 | +  | 0      | 0     | 0 | 1       |
| rs10790246  | 11 | 118103542 | T | A | -0.154 | 0.8775 | -  | 0      | 0.103 | 1 | 0.7486  |
| rs56225305  | 11 | 116625362 | A | G | -0.154 | 0.8775 | +  | -14.8  | 2.614 | 1 | 0.1059  |
| rs60067274  | 11 | 118412296 | T | A | 0.154  | 0.8775 | ++ | 0      | 0.026 | 1 | 0.872   |
| rs61898267  | 11 | 120072470 | G | C | -0.154 | 0.8775 | -  | 0      | 0     | 0 | 1       |
| rs7937334   | 11 | 118191274 | T | C | -0.154 | 0.8775 | -  | -104.6 | 1.466 | 1 | 0.2259  |
| rs7128466   | 11 | 120491438 | A | G | 0.154  | 0.8776 | +  | 0      | 0     | 0 | 1       |
| rs1145198   | 11 | 116574336 | A | G | -0.154 | 0.8778 | -  | -75.3  | 1.711 | 1 | 0.1909  |
| rs59253729  | 11 | 119833474 | T | C | -0.154 | 0.8778 | -  | 0      | 0     | 0 | 1       |
| rs117534497 | 11 | 119825806 | G | A | -0.154 | 0.8779 | -  | 0      | 0     | 0 | 1       |
| rs11217593  | 11 | 119822294 | A | G | -0.154 | 0.878  | -  | 0      | 0     | 0 | 1       |
| rs11217904  | 11 | 120397055 | C | T | 0.154  | 0.878  | +  | 0      | 0     | 0 | 1       |
| rs4938505   | 11 | 118205636 | A | G | 0.154  | 0.878  | +  | 0      | 0.962 | 1 | 0.3267  |
| rs12276648  | 11 | 117629056 | C | T | -0.153 | 0.8781 | +  | 17     | 3.614 | 1 | 0.05728 |
| rs10892230  | 11 | 118126682 | A | C | -0.153 | 0.8782 | -  | 0      | 0.185 | 1 | 0.6674  |
| rs557396    | 11 | 117445258 | A | G | -0.153 | 0.8782 | -  | 0      | 0     | 0 | 1       |
| rs58089984  | 11 | 116510680 | G | T | -0.153 | 0.8782 | -  | 0      | 0     | 0 | 1       |
| rs527005    | 11 | 117486829 | G | C | -0.153 | 0.8783 | -  | 0      | 0     | 0 | 1       |
| rs582718    | 11 | 120823104 | T | C | -0.153 | 0.8783 | -  | 0      | 0     | 0 | 1       |
| rs61226783  | 11 | 120398747 | G | A | -0.153 | 0.8783 | -  | 0      | 0     | 0 | 1       |
| rs12295970  | 11 | 117628906 | T | G | -0.153 | 0.8784 | +  | 17     | 3.615 | 1 | 0.05725 |
| rs57187632  | 11 | 116353776 | A | C | 0.153  | 0.8785 | +  | 0      | 0     | 0 | 1       |
| rs73585281  | 11 | 120855386 | G | A | -0.153 | 0.8787 | -  | 0      | 0.21  | 1 | 0.6465  |
| rs73585283  | 11 | 120855433 | A | G | -0.153 | 0.8787 | -  | 0      | 0.21  | 1 | 0.6465  |
| rs116603457 | 11 | 119474018 | T | C | 0.152  | 0.8788 | +  | 0      | 0     | 0 | 1       |
| rs608298    | 11 | 119886924 | C | T | 0.152  | 0.8788 | +  | 0      | 0     | 0 | 1       |
| rs527813    | 11 | 121094778 | G | T | -0.152 | 0.8789 | -  | 0      | 0.06  | 1 | 0.8061  |
| rs12274146  | 11 | 116605076 | A | G | -0.152 | 0.8792 | +  | -38.1  | 2.172 | 1 | 0.1405  |
| rs11216491  | 11 | 117536136 | T | C | -0.152 | 0.8793 | -  | 0      | 0     | 0 | 1       |
| rs542900    | 11 | 117225467 | A | T | 0.152  | 0.8793 | +  | 0      | 0     | 0 | 1       |
| rs7942259   | 11 | 119653947 | T | C | 0.152  | 0.8793 | +  | 0      | 0     | 0 | 1       |
| rs12793017  | 11 | 116858703 | G | A | -0.152 | 0.8794 | -  | 0      | 0     | 0 | 1       |
| rs61903708  | 11 | 117189201 | G | A | -0.152 | 0.8794 | -  | 0      | 0     | 0 | 1       |
| rs59049611  | 11 | 118139403 | C | T | -0.152 | 0.8795 | -  | 0      | 0     | 0 | 1       |
| rs61900932  | 11 | 118262706 | T | C | -0.152 | 0.8795 | -  | 0      | 0.047 | 1 | 0.8281  |
| rs7949440   | 11 | 120710315 | A | G | 0.151  | 0.8796 | +  | 0      | 0     | 0 | 1       |
| rs11216708  | 11 | 117897329 | T | C | 0.151  | 0.8798 | +  | 0      | 0     | 0 | 1       |
| rs61898286  | 11 | 120092344 | C | G | 0.151  | 0.8798 | +  | 0      | 0     | 0 | 1       |
| rs557940    | 11 | 117441393 | G | A | 0.151  | 0.8799 | +  | 0      | 0     | 0 | 1       |
| rs605560    | 11 | 118067187 | C | G | 0.151  | 0.8799 | +  | 0      | 0     | 0 | 1       |

|             |    |           |   |   |        |        |    |       |       |   |         |
|-------------|----|-----------|---|---|--------|--------|----|-------|-------|---|---------|
| rs552498    | 11 | 117260075 | G | A | -0.151 | 0.8801 | -? | 0     | 0     | 0 | 1       |
| rs61907594  | 11 | 116801811 | T | C | 0.151  | 0.8803 | +? | 0     | 0     | 0 | 1       |
| rs79974099  | 11 | 116802581 | A | T | 0.151  | 0.8803 | +? | 0     | 0     | 0 | 1       |
| rs112243842 | 11 | 118246021 | G | T | 0.15   | 0.8806 | -+ | -2.4  | 2.931 | 1 | 0.0869  |
| rs59294170  | 11 | 116841446 | T | A | 0.15   | 0.8807 | +? | 0     | 0     | 0 | 1       |
| rs651821    | 11 | 116662579 | C | T | -0.15  | 0.8807 | +- | -67.3 | 1.793 | 1 | 0.1806  |
| rs7109923   | 11 | 117237487 | G | A | 0.15   | 0.8808 | +? | 0     | 0     | 0 | 1       |
| rs77291360  | 11 | 120579966 | G | A | 0.15   | 0.881  | +? | 0     | 0     | 0 | 1       |
| rs609177    | 11 | 116770517 | A | G | 0.149  | 0.8813 | +? | 0     | 0     | 0 | 1       |
| rs75696653  | 11 | 117643228 | T | A | -0.149 | 0.8815 | +- | 25.9  | 4.049 | 1 | 0.04421 |
| rs10750151  | 11 | 119429736 | T | C | -0.149 | 0.8816 | -? | 0     | 0     | 0 | 1       |
| rs11216569  | 11 | 117699377 | T | C | 0.149  | 0.8817 | +? | 0     | 0     | 0 | 1       |
| rs45462696  | 11 | 117092660 | A | G | -0.149 | 0.8819 | -? | 0     | 0     | 0 | 1       |
| rs609467    | 11 | 119887725 | G | A | 0.149  | 0.8819 | +? | 0     | 0     | 0 | 1       |
| rs116966258 | 11 | 119766043 | A | G | -0.148 | 0.882  | -? | 0     | 0     | 0 | 1       |
| rs2276129   | 11 | 117973673 | A | G | 0.148  | 0.8823 | +- | 0     | 0.083 | 1 | 0.7729  |
| rs665035    | 11 | 121083812 | T | C | -0.148 | 0.8823 | -? | 0     | 0     | 0 | 1       |
| rs77984767  | 11 | 116496744 | G | A | 0.148  | 0.8823 | +? | 0     | 0     | 0 | 1       |
| rs118000999 | 11 | 116326685 | T | C | 0.148  | 0.8824 | +? | 0     | 0     | 0 | 1       |
| rs4317995   | 11 | 119622781 | A | G | 0.148  | 0.8824 | +? | 0     | 0     | 0 | 1       |
| rs4315086   | 11 | 119668265 | A | G | -0.148 | 0.8825 | -? | 0     | 0     | 0 | 1       |
| rs112646740 | 11 | 118247805 | A | T | 0.148  | 0.8827 | -+ | -2.9  | 2.915 | 1 | 0.08778 |
| rs755002    | 11 | 119439498 | T | C | 0.148  | 0.8827 | +? | 0     | 0     | 0 | 1       |
| rs5081      | 11 | 116706346 | T | A | 0.147  | 0.8828 | +- | -0.9  | 2.972 | 1 | 0.08469 |
| rs679847    | 11 | 121082861 | G | A | -0.147 | 0.8828 | -? | 0     | 0     | 0 | 1       |
| rs76867785  | 11 | 120133616 | G | A | -0.147 | 0.883  | -? | 0     | 0     | 0 | 1       |
| rs11216063  | 11 | 116502776 | A | T | 0.147  | 0.8831 | +? | 0     | 0     | 0 | 1       |
| rs507805    | 11 | 117167147 | G | A | -0.147 | 0.8831 | -? | 0     | 0     | 0 | 1       |
| rs56993455  | 11 | 119832917 | A | G | -0.147 | 0.8832 | -? | 0     | 0     | 0 | 1       |
| rs117119582 | 11 | 120181117 | C | T | -0.147 | 0.8833 | -? | 0     | 0     | 0 | 1       |
| rs61903816  | 11 | 117525308 | A | G | -0.147 | 0.8833 | -? | 0     | 0     | 0 | 1       |
| rs869789    | 11 | 117691386 | A | G | -0.147 | 0.8833 | -? | 0     | 0     | 0 | 1       |
| rs113164826 | 11 | 119664546 | C | G | -0.146 | 0.8836 | -? | 0     | 0     | 0 | 1       |
| rs7389      | 11 | 118528466 | G | T | -0.146 | 0.8836 | -+ | 0     | 0.439 | 1 | 0.5078  |
| rs77417358  | 11 | 119845184 | T | C | -0.146 | 0.8836 | -? | 0     | 0     | 0 | 1       |
| rs4938333   | 11 | 116930888 | G | A | 0.146  | 0.8837 | +? | 0     | 0     | 0 | 1       |
| rs4938338   | 11 | 116972894 | A | C | 0.146  | 0.8837 | +? | 0     | 0     | 0 | 1       |
| rs573549    | 11 | 116736679 | A | G | -0.146 | 0.8837 | -? | 0     | 0     | 0 | 1       |
| rs61903394  | 11 | 116931898 | A | G | 0.146  | 0.8837 | +? | 0     | 0     | 0 | 1       |
| rs11216055  | 11 | 116500588 | T | C | 0.146  | 0.8838 | +? | 0     | 0     | 0 | 1       |
| rs11216056  | 11 | 116500629 | A | C | 0.146  | 0.8838 | +? | 0     | 0     | 0 | 1       |
| rs11216057  | 11 | 116500768 | T | C | 0.146  | 0.8838 | +? | 0     | 0     | 0 | 1       |
| rs7108677   | 11 | 119444978 | G | C | -0.146 | 0.8838 | -? | 0     | 0     | 0 | 1       |
| rs7108679   | 11 | 119444980 | G | A | -0.146 | 0.8838 | -? | 0     | 0     | 0 | 1       |
| rs10892697  | 11 | 121115967 | C | G | 0.146  | 0.8841 | +? | 0     | 0     | 0 | 1       |
| rs2277291   | 11 | 118435756 | T | C | 0.146  | 0.8842 | +- | 0     | 0.063 | 1 | 0.802   |
| rs3016415   | 11 | 120676208 | G | T | -0.146 | 0.8842 | -? | 0     | 0     | 0 | 1       |
| rs61903169  | 11 | 120855705 | T | A | -0.146 | 0.8842 | -+ | 0     | 0.207 | 1 | 0.6494  |
| rs7119954   | 11 | 120046224 | C | T | 0.146  | 0.8842 | +? | 0     | 0     | 0 | 1       |
| rs61898281  | 11 | 120088926 | G | A | 0.146  | 0.8843 | +? | 0     | 0     | 0 | 1       |
| rs10790344  | 11 | 119639398 | G | A | 0.145  | 0.8844 | +? | 0     | 0     | 0 | 1       |
| rs61905690  | 11 | 116876168 | G | C | -0.145 | 0.8845 | -? | 0     | 0     | 0 | 1       |
| rs7949539   | 11 | 118250586 | G | A | 0.145  | 0.8845 | +- | 0     | 0.17  | 1 | 0.6802  |
| rs192958777 | 11 | 117134152 | T | C | -0.145 | 0.8846 | -? | 0     | 0     | 0 | 1       |
| rs11215978  | 11 | 116391537 | C | T | -0.145 | 0.8847 | -? | 0     | 0     | 0 | 1       |
| rs4525269   | 11 | 117722292 | C | T | -0.145 | 0.8847 | -? | 0     | 0     | 0 | 1       |

|             |    |           |   |   |        |        |    |        |       |   |         |
|-------------|----|-----------|---|---|--------|--------|----|--------|-------|---|---------|
| rs4525270   | 11 | 117722501 | C | T | -0.145 | 0.8847 | -? | 0      | 0     | 0 | 1       |
| rs60044901  | 11 | 117601018 | C | G | 0.145  | 0.8849 | +? | 0      | 0     | 0 | 1       |
| rs7938470   | 11 | 116990934 | A | G | -0.145 | 0.8849 | -? | 0      | 0     | 0 | 1       |
| rs113348846 | 11 | 120123145 | A | G | -0.145 | 0.885  | -? | 0      | 0     | 0 | 1       |
| rs2276057   | 11 | 121036315 | A | G | -0.145 | 0.885  | -? | 0      | 0     | 0 | 1       |
| rs61905530  | 11 | 117077716 | A | G | -0.145 | 0.885  | -? | 0      | 0     | 0 | 1       |
| rs10750103  | 11 | 117042238 | C | T | 0.144  | 0.8852 | +? | 0      | 0     | 0 | 1       |
| rs61624438  | 11 | 116809945 | A | C | 0.144  | 0.8852 | +? | 0      | 0     | 0 | 1       |
| rs906823    | 11 | 119441311 | A | G | -0.144 | 0.8853 | -? | 0      | 0     | 0 | 1       |
| rs906824    | 11 | 119441696 | T | C | -0.144 | 0.8853 | -? | 0      | 0     | 0 | 1       |
| rs906825    | 11 | 119441804 | G | A | -0.144 | 0.8853 | -? | 0      | 0     | 0 | 1       |
| rs906826    | 11 | 119442188 | T | C | -0.144 | 0.8853 | -? | 0      | 0     | 0 | 1       |
| rs681637    | 11 | 121084190 | C | T | -0.144 | 0.8855 | -? | 0      | 0     | 0 | 1       |
| rs579163    | 11 | 116713630 | C | G | -0.144 | 0.8856 | -? | 0      | 0     | 0 | 1       |
| rs116864232 | 11 | 117830715 | C | T | -0.144 | 0.8857 | -? | 0      | 0     | 0 | 1       |
| rs10466593  | 11 | 119454588 | T | C | -0.144 | 0.8858 | -? | 0      | 0     | 0 | 1       |
| rs11216635  | 11 | 117800682 | G | A | 0.144  | 0.8858 | +  | -160.6 | 1.151 | 1 | 0.2833  |
| rs4290266   | 11 | 118285995 | A | G | 0.144  | 0.8858 | +  | 0      | 0.166 | 1 | 0.6834  |
| rs11216122  | 11 | 116609540 | T | G | -0.143 | 0.8859 | -? | 0      | 0     | 0 | 1       |
| rs4938351   | 11 | 117022352 | A | C | 0.143  | 0.886  | +? | 0      | 0     | 0 | 1       |
| rs10790346  | 11 | 119658393 | G | C | 0.143  | 0.8865 | +? | 0      | 0     | 0 | 1       |
| rs4340085   | 11 | 116496309 | T | C | 0.143  | 0.8865 | +? | 0      | 0     | 0 | 1       |
| rs7110743   | 11 | 118825762 | A | C | -0.143 | 0.8865 | -? | 0      | 0     | 0 | 1       |
| rs73004793  | 11 | 120061255 | C | T | 0.143  | 0.8866 | +? | 0      | 0     | 0 | 1       |
| rs12275955  | 11 | 118094756 | C | T | -0.143 | 0.8867 | +  | 0      | 0.476 | 1 | 0.4904  |
| rs56301948  | 11 | 118049880 | G | A | 0.143  | 0.8867 | +  | 0      | 0.437 | 1 | 0.5086  |
| rs57533048  | 11 | 118050014 | G | A | 0.143  | 0.8867 | +  | 0      | 0.437 | 1 | 0.5086  |
| rs59018400  | 11 | 118049811 | T | C | 0.143  | 0.8867 | +  | 0      | 0.437 | 1 | 0.5086  |
| rs61472653  | 11 | 118049759 | C | T | 0.143  | 0.8867 | +  | 0      | 0.437 | 1 | 0.5086  |
| rs7123533   | 11 | 118049257 | G | C | 0.143  | 0.8867 | +  | 0      | 0.437 | 1 | 0.5086  |
| rs7342223   | 11 | 118050348 | G | T | 0.143  | 0.8867 | +  | 0      | 0.437 | 1 | 0.5086  |
| rs7931923   | 11 | 120393776 | G | A | 0.142  | 0.8871 | +? | 0      | 0     | 0 | 1       |
| rs111430146 | 11 | 118248374 | A | C | 0.142  | 0.8873 | +  | -4.2   | 2.88  | 1 | 0.08967 |
| rs1939664   | 11 | 120585300 | A | T | 0.142  | 0.8873 | +? | 0      | 0     | 0 | 1       |
| rs11217972  | 11 | 120552212 | T | C | -0.141 | 0.8875 | -? | 0      | 0     | 0 | 1       |
| rs61906079  | 11 | 116533660 | G | C | 0.141  | 0.8875 | +? | 0      | 0     | 0 | 1       |
| rs657706    | 11 | 119893574 | C | T | 0.141  | 0.8876 | +? | 0      | 0     | 0 | 1       |
| rs17245368  | 11 | 119879327 | T | C | -0.141 | 0.8877 | -? | 0      | 0     | 0 | 1       |
| rs61899021  | 11 | 119780975 | T | G | -0.141 | 0.8878 | -? | 0      | 0     | 0 | 1       |
| rs682795    | 11 | 118983681 | C | T | -0.141 | 0.888  | -? | 0      | 0     | 0 | 1       |
| rs587304    | 11 | 119890949 | G | C | 0.141  | 0.8881 | +? | 0      | 0     | 0 | 1       |
| rs10750152  | 11 | 119431293 | T | C | -0.14  | 0.8884 | -? | 0      | 0     | 0 | 1       |
| rs10892398  | 11 | 119431487 | C | T | -0.14  | 0.8884 | -? | 0      | 0     | 0 | 1       |
| rs11217320  | 11 | 119431655 | G | A | -0.14  | 0.8884 | -? | 0      | 0     | 0 | 1       |
| rs11217321  | 11 | 119432084 | G | A | -0.14  | 0.8884 | -? | 0      | 0     | 0 | 1       |
| rs55808044  | 11 | 119431602 | G | C | -0.14  | 0.8884 | -? | 0      | 0     | 0 | 1       |
| rs11217460  | 11 | 119622162 | G | C | 0.14   | 0.8885 | +? | 0      | 0     | 0 | 1       |
| rs513510    | 11 | 116482451 | C | T | 0.14   | 0.889  | +? | 0      | 0     | 0 | 1       |
| rs61898290  | 11 | 120094385 | A | G | 0.139  | 0.8891 | +? | 0      | 0     | 0 | 1       |
| rs73003294  | 11 | 118661376 | T | C | -0.139 | 0.8892 | +  | 0      | 0.9   | 1 | 0.3427  |
| rs10736504  | 11 | 120584018 | A | G | 0.139  | 0.8894 | +? | 0      | 0     | 0 | 1       |
| rs916493    | 11 | 119429855 | T | G | 0.139  | 0.8894 | +? | 0      | 0     | 0 | 1       |
| rs1876792   | 11 | 119444435 | G | A | -0.139 | 0.8895 | -? | 0      | 0     | 0 | 1       |
| rs11607827  | 11 | 119731345 | G | T | 0.139  | 0.8896 | +? | 0      | 0     | 0 | 1       |
| rs2663628   | 11 | 119434182 | C | A | 0.139  | 0.8897 | +? | 0      | 0     | 0 | 1       |
| rs2084898   | 11 | 120026748 | A | G | 0.139  | 0.8898 | +? | 0      | 0     | 0 | 1       |

|              |    |           |   |   |        |        |   |       |       |   |         |
|--------------|----|-----------|---|---|--------|--------|---|-------|-------|---|---------|
| rs501351     | 11 | 118917814 | G | T | 0.139  | 0.8898 | + | 0     | 0     | 0 | 1       |
| rs7130098    | 11 | 117701783 | C | G | 0.138  | 0.8899 | + | 0     | 0     | 0 | 1       |
| rs143470629  | 11 | 119762628 | T | C | 0.138  | 0.8901 | + | 0     | 0     | 0 | 1       |
| rs61907591   | 11 | 116796855 | A | T | 0.138  | 0.8902 | + | 0     | 0     | 0 | 1       |
| rs113858735  | 11 | 117625225 | A | G | -0.138 | 0.8904 | + | 27    | 4.109 | 1 | 0.04267 |
| rs3741333    | 11 | 118986972 | T | C | -0.138 | 0.8905 | - | 0     | 0     | 0 | 1       |
| rs111354396  | 11 | 118296184 | A | G | 0.138  | 0.8906 | + | -15.1 | 2.607 | 1 | 0.1064  |
| rs1473325    | 11 | 116822034 | T | C | 0.138  | 0.8906 | + | 0     | 0     | 0 | 1       |
| rs2846096    | 11 | 120645487 | G | A | 0.138  | 0.8906 | + | 0     | 0     | 0 | 1       |
| rs3741325    | 11 | 118405989 | G | A | 0.137  | 0.8907 | + | 0     | 0.001 | 1 | 0.9718  |
| rs77718036   | 11 | 117964613 | T | C | 0.137  | 0.8907 | + | 0     | 0     | 0 | 1       |
| rs10892160   | 11 | 117552640 | G | A | -0.137 | 0.8908 | - | 0     | 0     | 0 | 1       |
| rs12574186   | 11 | 120550286 | G | A | 0.137  | 0.8909 | + | 0     | 0     | 0 | 1       |
| rs483283     | 11 | 118506402 | C | T | -0.137 | 0.8909 | + | 0     | 0.509 | 1 | 0.4755  |
| rs117420503  | 11 | 119975137 | T | C | 0.137  | 0.891  | + | 0     | 0     | 0 | 1       |
| rs4938520    | 11 | 118522338 | G | A | -0.137 | 0.891  | + | 0     | 0.521 | 1 | 0.4704  |
| rs558229     | 11 | 117178225 | G | A | 0.137  | 0.8911 | + | 0     | 0     | 0 | 1       |
| rs113981653  | 11 | 120048628 | T | C | 0.137  | 0.8913 | + | 0     | 0     | 0 | 1       |
| rs671334     | 11 | 119934058 | A | G | 0.137  | 0.8913 | + | 0     | 0     | 0 | 1       |
| rs11217096   | 11 | 118796570 | T | C | 0.137  | 0.8914 | + | 0     | 0.021 | 1 | 0.885   |
| rs568787     | 11 | 117218762 | A | G | -0.137 | 0.8914 | - | 0     | 0     | 0 | 1       |
| rs1041395195 | 11 | 117225441 | T | G | 0.136  | 0.8915 | + | 0     | 0     | 0 | 1       |
| rs12271064   | 11 | 118119211 | G | A | -0.136 | 0.8917 | + | 0     | 0.148 | 1 | 0.7001  |
| rs236915     | 11 | 117088450 | G | A | 0.136  | 0.8918 | + | 0     | 0     | 0 | 1       |
| rs11218202   | 11 | 121087341 | G | A | -0.136 | 0.892  | - | 0     | 0     | 0 | 1       |
| rs7119655    | 11 | 120549488 | G | A | -0.136 | 0.8922 | - | 0     | 0     | 0 | 1       |
| rs1263162    | 11 | 116705021 | A | T | -0.135 | 0.8923 | + | 4.5   | 3.142 | 1 | 0.07629 |
| rs111560312  | 11 | 116983556 | A | G | -0.135 | 0.8924 | - | 0     | 0     | 0 | 1       |
| rs1617182    | 11 | 118068949 | C | T | 0.135  | 0.8925 | + | 0     | 0     | 0 | 1       |
| rs568221     | 11 | 117476349 | T | C | -0.135 | 0.8926 | - | 0     | 0     | 0 | 1       |
| rs12224987   | 11 | 120552193 | T | C | -0.135 | 0.8928 | - | 0     | 0     | 0 | 1       |
| rs145637218  | 11 | 119805057 | A | G | -0.135 | 0.8928 | - | 0     | 0     | 0 | 1       |
| rs1145212    | 11 | 116556865 | A | G | -0.135 | 0.8929 | - | 0     | 0     | 0 | 1       |
| rs76604009   | 11 | 117085261 | T | C | -0.135 | 0.8929 | - | 0     | 0     | 0 | 1       |
| rs4936493    | 11 | 119568070 | T | A | -0.135 | 0.893  | - | 0     | 0     | 0 | 1       |
| rs4936506    | 11 | 119794035 | T | C | -0.135 | 0.893  | - | 0     | 0     | 0 | 1       |
| rs61581699   | 11 | 118045423 | A | G | 0.135  | 0.893  | + | 0     | 0.394 | 1 | 0.5303  |
| rs7104343    | 11 | 116529024 | T | C | -0.135 | 0.893  | - | 0     | 0     | 0 | 1       |
| rs74332985   | 11 | 116220623 | C | T | 0.134  | 0.8931 | + | 0     | 0     | 0 | 1       |
| rs141259801  | 11 | 117718626 | T | C | 0.134  | 0.8932 | + | 0     | 0     | 0 | 1       |
| rs61898269   | 11 | 120073606 | C | A | -0.134 | 0.8932 | - | 0     | 0     | 0 | 1       |
| rs87824      | 11 | 117442242 | C | G | 0.134  | 0.8932 | + | 0     | 0     | 0 | 1       |
| rs1168569    | 11 | 118947168 | G | A | 0.134  | 0.8933 | + | 0     | 0     | 0 | 1       |
| rs11826651   | 11 | 116920693 | A | T | 0.134  | 0.8933 | + | 0     | 0     | 0 | 1       |
| rs12362348   | 11 | 120541508 | C | G | 0.134  | 0.8933 | + | 0     | 0     | 0 | 1       |
| rs17566737   | 11 | 116230506 | C | T | -0.134 | 0.8935 | - | 0     | 0     | 0 | 1       |
| rs11826742   | 11 | 116924366 | G | C | 0.134  | 0.8937 | + | 0     | 0     | 0 | 1       |
| rs11216398   | 11 | 117323082 | T | C | -0.133 | 0.8938 | - | 0     | 0     | 0 | 1       |
| rs11216614   | 11 | 117777929 | C | G | -0.133 | 0.8938 | - | 0     | 0     | 0 | 1       |
| rs147893781  | 11 | 116848716 | T | C | -0.133 | 0.8938 | - | 0     | 0     | 0 | 1       |
| rs11216790   | 11 | 118044144 | T | G | 0.133  | 0.8939 | + | 0     | 0.381 | 1 | 0.5369  |
| rs3887268    | 11 | 119950310 | G | C | -0.133 | 0.894  | - | 0     | 0     | 0 | 1       |
| rs570836     | 11 | 118512162 | A | G | -0.133 | 0.8942 | + | 0     | 0.519 | 1 | 0.4713  |
| rs10892166   | 11 | 117605839 | A | G | 0.133  | 0.8943 | + | 0     | 0     | 0 | 1       |
| rs566880     | 11 | 119695011 | T | C | -0.133 | 0.8943 | - | 0     | 0     | 0 | 1       |
| rs12574240   | 11 | 120569381 | C | T | -0.133 | 0.8944 | - | 0     | 0     | 0 | 1       |

|              |    |           |   |   |        |        |   |        |       |   |         |
|--------------|----|-----------|---|---|--------|--------|---|--------|-------|---|---------|
| rs7131339    | 11 | 119973082 | A | G | 0.133  | 0.8944 | + | 0      | 0     | 0 | 1       |
| rs73588361   | 11 | 120590848 | A | G | -0.133 | 0.8945 | - | 0      | 0     | 0 | 1       |
| rs10750154   | 11 | 119432909 | G | A | -0.132 | 0.8947 | - | 0      | 0     | 0 | 1       |
| rs1369553921 | 11 | 117222592 | A | G | 0.132  | 0.8947 | + | 0      | 0     | 0 | 1       |
| rs514806     | 11 | 117222942 | T | G | 0.132  | 0.8947 | + | 0      | 0     | 0 | 1       |
| rs61900472   | 11 | 120009748 | A | G | 0.132  | 0.8947 | + | 0      | 0     | 0 | 1       |
| rs688207     | 11 | 117222139 | T | C | 0.132  | 0.8947 | + | 0      | 0     | 0 | 1       |
| rs35114640   | 11 | 120640009 | A | C | 0.132  | 0.8948 | + | 0      | 0     | 0 | 1       |
| rs525914     | 11 | 119695450 | T | C | -0.132 | 0.8948 | - | 0      | 0     | 0 | 1       |
| rs11216360   | 11 | 117213189 | A | G | 0.132  | 0.8949 | + | 0      | 0     | 0 | 1       |
| rs11605435   | 11 | 118116496 | C | T | -0.132 | 0.8949 | - | 0      | 0.178 | 1 | 0.6734  |
| rs145476010  | 11 | 119943314 | A | C | 0.132  | 0.895  | + | 0      | 0     | 0 | 1       |
| rs1876794    | 11 | 119444016 | C | G | -0.132 | 0.895  | - | 0      | 0     | 0 | 1       |
| rs61905708   | 11 | 116886159 | T | G | -0.132 | 0.895  | - | 0      | 0     | 0 | 1       |
| rs79973603   | 11 | 117643723 | C | T | -0.132 | 0.895  | + | 25     | 4.002 | 1 | 0.04545 |
| rs17597688   | 11 | 117795942 | G | A | 0.132  | 0.8952 | + | 0      | 0.785 | 1 | 0.3756  |
| rs17119549   | 11 | 116241208 | T | G | -0.132 | 0.8953 | - | 0      | 0     | 0 | 1       |
| rs1168570    | 11 | 118947154 | C | T | 0.131  | 0.8954 | + | 0      | 0     | 0 | 1       |
| rs12280557   | 11 | 118117118 | T | C | -0.131 | 0.8956 | - | 0      | 0.179 | 1 | 0.6721  |
| rs56182713   | 11 | 116558828 | A | G | 0.131  | 0.8956 | + | 0      | 0     | 0 | 1       |
| rs7924318    | 11 | 116816630 | G | C | 0.131  | 0.8956 | + | 0      | 0     | 0 | 1       |
| rs10502247   | 11 | 120998942 | T | C | -0.131 | 0.8958 | + | 0      | 0.699 | 1 | 0.4031  |
| rs10790254   | 11 | 118493319 | A | G | -0.131 | 0.8959 | - | 0      | 0.112 | 1 | 0.7379  |
| rs80178624   | 11 | 116236271 | A | T | -0.131 | 0.8959 | + | -176.9 | 1.084 | 1 | 0.2979  |
| rs996889     | 11 | 119428421 | G | A | 0.131  | 0.8959 | + | 0      | 0     | 0 | 1       |
| rs11217967   | 11 | 120548795 | A | C | -0.131 | 0.896  | - | 0      | 0     | 0 | 1       |
| rs12294117   | 11 | 117662864 | A | G | 0.131  | 0.896  | + | 0      | 0.01  | 1 | 0.9205  |
| rs80343155   | 11 | 117346337 | C | A | 0.131  | 0.8961 | + | 0      | 0     | 0 | 1       |
| rs7936400    | 11 | 119655589 | C | T | 0.13   | 0.8966 | + | 0      | 0     | 0 | 1       |
| rs17123506   | 11 | 119842708 | G | A | -0.13  | 0.8967 | - | 0      | 0     | 0 | 1       |
| rs548877     | 11 | 118300240 | G | A | 0.13   | 0.8967 | + | 0      | 0.062 | 1 | 0.8031  |
| rs77454413   | 11 | 120664625 | A | G | 0.13   | 0.8968 | + | 0      | 0     | 0 | 1       |
| rs11604096   | 11 | 118012441 | C | A | 0.13   | 0.8969 | + | 0      | 0.001 | 1 | 0.9805  |
| rs146781782  | 11 | 117615894 | A | G | -0.13  | 0.8969 | - | 0      | 0     | 0 | 1       |
| rs634960     | 11 | 117072963 | C | T | 0.129  | 0.897  | + | 0      | 0     | 0 | 1       |
| rs7130531    | 11 | 116863833 | T | C | 0.129  | 0.8974 | + | 0      | 0     | 0 | 1       |
| rs7124084    | 11 | 117235412 | T | C | 0.129  | 0.8975 | + | 0      | 0     | 0 | 1       |
| rs11216794   | 11 | 118044740 | A | T | 0.129  | 0.8976 | + | 0      | 0.383 | 1 | 0.5363  |
| rs35544562   | 11 | 119369816 | C | G | 0.128  | 0.8978 | + | 0      | 0     | 0 | 1       |
| rs45448191   | 11 | 118267737 | A | T | -0.128 | 0.8981 | - | -21.3  | 2.474 | 1 | 0.1157  |
| rs2845710    | 11 | 117697982 | A | G | 0.128  | 0.8982 | + | 0      | 0     | 0 | 1       |
| rs61905679   | 11 | 116834787 | T | C | 0.128  | 0.8982 | + | 0      | 0     | 0 | 1       |
| rs75904569   | 11 | 116988313 | G | A | -0.128 | 0.8983 | - | 0      | 0     | 0 | 1       |
| rs79281178   | 11 | 118298041 | G | C | 0.128  | 0.8983 | + | 0      | 0.121 | 1 | 0.7282  |
| rs11608072   | 11 | 118030086 | C | G | -0.128 | 0.8984 | - | 0      | 0.078 | 1 | 0.7797  |
| rs679327     | 11 | 118042974 | G | A | 0.128  | 0.8984 | + | 0      | 0.004 | 1 | 0.948   |
| rs78054182   | 11 | 119792099 | C | T | 0.127  | 0.8988 | + | 0      | 0     | 0 | 1       |
| rs113739713  | 11 | 118420101 | G | A | 0.127  | 0.8991 | + | 0      | 0.007 | 1 | 0.9329  |
| rs12295676   | 11 | 118054345 | A | G | 0.127  | 0.8991 | + | 0      | 0.398 | 1 | 0.528   |
| rs150233369  | 11 | 116629555 | A | G | 0.127  | 0.8991 | + | 0      | 0     | 0 | 1       |
| rs61897923   | 11 | 119903434 | C | T | 0.127  | 0.8991 | + | 0      | 0     | 0 | 1       |
| rs12419633   | 11 | 121152173 | A | G | 0.127  | 0.8993 | + | 0      | 0     | 0 | 1       |
| rs10892219   | 11 | 117983054 | A | G | -0.126 | 0.8994 | - | 0      | 0     | 0 | 1       |
| rs10892095   | 11 | 117213893 | G | A | 0.126  | 0.8995 | + | 0      | 0     | 0 | 1       |
| rs7104443    | 11 | 117996885 | G | C | 0.126  | 0.8995 | + | 0      | 0     | 0 | 1       |
| rs1715444    | 11 | 118016273 | G | T | 0.126  | 0.8997 | + | 0      | 0.03  | 1 | 0.8616  |

|             |    |           |   |   |        |        |    |        |       |   |         |
|-------------|----|-----------|---|---|--------|--------|----|--------|-------|---|---------|
| rs12801003  | 11 | 118072716 | T | C | 0.125  | 0.9002 | +  | 0      | 0.523 | 1 | 0.4697  |
| rs10502227  | 11 | 118147496 | C | T | 0.125  | 0.9004 | +  | -21.4  | 2.471 | 1 | 0.116   |
| rs11603267  | 11 | 118146599 | T | G | 0.125  | 0.9004 | +  | -21.4  | 2.471 | 1 | 0.116   |
| rs34815971  | 11 | 118301066 | G | A | 0.125  | 0.9004 | +  | 0      | 0.061 | 1 | 0.8051  |
| rs10790282  | 11 | 118973133 | G | A | -0.125 | 0.9007 | -? | 0      | 0     | 0 | 1       |
| rs11216792  | 11 | 118044450 | T | G | 0.125  | 0.9007 | +  | 0      | 0.375 | 1 | 0.5402  |
| rs510997    | 11 | 118302901 | C | T | 0.125  | 0.9007 | +  | 0      | 0.101 | 1 | 0.7505  |
| rs75403174  | 11 | 118043904 | A | C | 0.125  | 0.9008 | +  | 0      | 0.375 | 1 | 0.5402  |
| rs35650539  | 11 | 120039306 | G | C | 0.124  | 0.901  | +  | 0      | 0     | 0 | 1       |
| rs12291619  | 11 | 118062552 | A | G | -0.124 | 0.9013 | +  | 0      | 0.234 | 1 | 0.6283  |
| rs138282449 | 11 | 116331800 | C | G | -0.124 | 0.9015 | -? | 0      | 0     | 0 | 1       |
| rs7117544   | 11 | 118117938 | C | A | -0.124 | 0.9016 | +  | 0      | 0.191 | 1 | 0.6625  |
| rs745663    | 11 | 118529595 | G | A | -0.124 | 0.9017 | +  | 0      | 0.421 | 1 | 0.5162  |
| rs11216892  | 11 | 118424008 | T | C | 0.123  | 0.9018 | +  | 0      | 0.02  | 1 | 0.8881  |
| rs12577841  | 11 | 118194599 | T | C | 0.123  | 0.9018 | +  | 0      | 0.115 | 1 | 0.7347  |
| rs520326    | 11 | 116315660 | G | T | 0.123  | 0.9018 | +  | 0      | 0     | 0 | 1       |
| rs78160609  | 11 | 120131372 | A | G | -0.123 | 0.9018 | -? | 0      | 0     | 0 | 1       |
| rs12362311  | 11 | 120541373 | T | C | 0.123  | 0.9019 | +  | 0      | 0     | 0 | 1       |
| rs61900479  | 11 | 120040695 | T | C | 0.123  | 0.9019 | +  | 0      | 0     | 0 | 1       |
| rs1613495   | 11 | 118017645 | T | C | 0.123  | 0.902  | +  | 0      | 0.121 | 1 | 0.728   |
| rs7934067   | 11 | 117232954 | G | A | 0.123  | 0.9021 | +  | 0      | 0     | 0 | 1       |
| rs542378    | 11 | 120855998 | T | C | -0.123 | 0.9022 | +  | 0      | 0.195 | 1 | 0.6588  |
| rs11600129  | 11 | 117800169 | C | T | 0.123  | 0.9023 | +  | -176.1 | 1.086 | 1 | 0.2973  |
| rs73020500  | 11 | 117777101 | T | C | 0.123  | 0.9023 | +  | 0      | 0     | 0 | 1       |
| rs591744    | 11 | 119939826 | G | A | -0.122 | 0.9026 | -? | 0      | 0     | 0 | 1       |
| rs1261744   | 11 | 117218460 | C | T | 0.122  | 0.9027 | +  | 0      | 0     | 0 | 1       |
| rs680630    | 11 | 119934081 | T | G | 0.122  | 0.9027 | +  | 0      | 0     | 0 | 1       |
| rs12225187  | 11 | 116793231 | G | A | 0.122  | 0.9029 | +  | 0      | 0     | 0 | 1       |
| rs35392431  | 11 | 117973338 | G | C | -0.122 | 0.9029 | +  | 0      | 0.052 | 1 | 0.8192  |
| rs61903398  | 11 | 116941613 | T | C | 0.122  | 0.903  | +  | 0      | 0     | 0 | 1       |
| rs61903399  | 11 | 116942475 | T | A | 0.122  | 0.903  | +  | 0      | 0     | 0 | 1       |
| rs734378    | 11 | 117597660 | T | C | 0.122  | 0.903  | +  | 0      | 0     | 0 | 1       |
| rs118155427 | 11 | 116975084 | C | G | -0.122 | 0.9031 | +  | 37.8   | 4.824 | 1 | 0.02807 |
| rs139202987 | 11 | 118474283 | G | A | -0.122 | 0.9031 | +  | 0      | 0.034 | 1 | 0.854   |
| rs11216779  | 11 | 118002372 | T | C | -0.122 | 0.9032 | -? | 0      | 0     | 0 | 1       |
| rs12282334  | 11 | 118057783 | G | C | 0.122  | 0.9032 | +  | 0      | 0.387 | 1 | 0.5338  |
| rs57145837  | 11 | 117574499 | A | G | 0.122  | 0.9032 | +  | 0      | 0     | 0 | 1       |
| rs7934292   | 11 | 118059914 | C | T | 0.122  | 0.9032 | +  | 0      | 0.387 | 1 | 0.5338  |
| rs7935492   | 11 | 118056823 | T | C | 0.122  | 0.9032 | +  | 0      | 0.387 | 1 | 0.5338  |
| rs10488699  | 11 | 116632500 | T | C | -0.121 | 0.9035 | +  | -1.7   | 2.95  | 1 | 0.08589 |
| rs7114615   | 11 | 120704659 | T | G | 0.121  | 0.9035 | +  | 0      | 0     | 0 | 1       |
| rs11216062  | 11 | 116502768 | A | C | 0.121  | 0.9036 | +  | 0      | 0     | 0 | 1       |
| rs12365289  | 11 | 117521152 | G | C | -0.121 | 0.9037 | -? | 0      | 0     | 0 | 1       |
| rs1968541   | 11 | 116237825 | A | G | 0.121  | 0.9037 | +  | -145.3 | 1.223 | 1 | 0.2688  |
| rs10892399  | 11 | 119432144 | C | T | -0.121 | 0.9039 | -? | 0      | 0     | 0 | 1       |
| rs11217255  | 11 | 119231667 | G | A | -0.121 | 0.9039 | -? | 0      | 0     | 0 | 1       |
| rs12420446  | 11 | 116207302 | A | G | -0.121 | 0.9039 | -? | 0      | 0     | 0 | 1       |
| rs508871    | 11 | 117219770 | A | G | 0.121  | 0.9039 | +  | 0      | 0     | 0 | 1       |
| rs2115923   | 11 | 121158779 | A | G | -0.121 | 0.904  | -? | 0      | 0     | 0 | 1       |
| rs7124127   | 11 | 118006408 | C | T | -0.121 | 0.904  | +  | 0      | 0.155 | 1 | 0.6935  |
| rs10750148  | 11 | 119412474 | A | T | 0.12   | 0.9041 | +  | 0      | 0     | 0 | 1       |
| rs11217575  | 11 | 119792847 | G | A | 0.12   | 0.9043 | +  | 0      | 0     | 0 | 1       |
| rs12286303  | 11 | 118114473 | T | C | -0.12  | 0.9045 | +  | 0      | 0.158 | 1 | 0.6906  |
| rs11217466  | 11 | 119624993 | A | T | -0.12  | 0.9047 | -? | 0      | 0     | 0 | 1       |
| rs61898285  | 11 | 120091653 | T | C | 0.12   | 0.9048 | +  | 0      | 0     | 0 | 1       |
| rs112305884 | 11 | 116495784 | T | C | 0.119  | 0.9049 | +  | 0      | 0     | 0 | 1       |

|             |    |           |   |   |        |        |   |        |       |   |        |
|-------------|----|-----------|---|---|--------|--------|---|--------|-------|---|--------|
| rs145672593 | 11 | 117010263 | T | C | 0.119  | 0.9049 | + | 0      | 0     | 0 | 1      |
| rs75709684  | 11 | 118050958 | A | G | 0.119  | 0.905  | + | 0      | 0.397 | 1 | 0.5287 |
| rs17092876  | 11 | 120398643 | A | G | -0.119 | 0.9053 | - | 0      | 0     | 0 | 1      |
| rs12286567  | 11 | 118114788 | T | G | -0.119 | 0.9055 | + | 0      | 0.16  | 1 | 0.689  |
| rs476937    | 11 | 119697594 | A | G | -0.119 | 0.9055 | - | 0      | 0     | 0 | 1      |
| rs73005215  | 11 | 116312418 | G | A | -0.119 | 0.9056 | - | 0      | 0     | 0 | 1      |
| rs150762661 | 11 | 116345271 | C | A | -0.118 | 0.9058 | - | 0      | 0     | 0 | 1      |
| rs61905687  | 11 | 116862144 | C | T | 0.118  | 0.9058 | + | 0      | 0     | 0 | 1      |
| rs75459003  | 11 | 118053859 | C | A | 0.118  | 0.9058 | + | 0      | 0.392 | 1 | 0.5312 |
| rs7950213   | 11 | 116868654 | A | C | 0.118  | 0.9058 | + | 0      | 0     | 0 | 1      |
| rs35626144  | 11 | 119459523 | G | A | 0.118  | 0.9059 | + | 0      | 0     | 0 | 1      |
| rs4344527   | 11 | 117973511 | G | A | 0.118  | 0.906  | + | 0      | 0.089 | 1 | 0.7648 |
| rs147146093 | 11 | 117578440 | A | G | 0.118  | 0.9062 | + | 0      | 0     | 0 | 1      |
| rs611979    | 11 | 118034223 | A | G | 0.118  | 0.9062 | + | 0      | 0.462 | 1 | 0.4965 |
| rs7934773   | 11 | 117579531 | A | G | 0.118  | 0.9062 | + | 0      | 0     | 0 | 1      |
| rs2305825   | 11 | 117232492 | T | C | 0.118  | 0.9064 | + | 0      | 0     | 0 | 1      |
| rs17591711  | 11 | 117228849 | G | A | 0.117  | 0.9066 | + | 0      | 0     | 0 | 1      |
| rs2014537   | 11 | 117691148 | C | T | -0.117 | 0.9066 | - | 0      | 0     | 0 | 1      |
| rs567312    | 11 | 116730738 | G | A | 0.117  | 0.9068 | + | 0      | 0     | 0 | 1      |
| rs470606    | 11 | 120028202 | G | T | -0.117 | 0.9069 | - | 0      | 0     | 0 | 1      |
| rs7106413   | 11 | 120769943 | T | C | 0.117  | 0.9069 | + | 0      | 0     | 0 | 1      |
| rs501776    | 11 | 117258198 | C | T | -0.117 | 0.907  | - | 0      | 0     | 0 | 1      |
| rs34708128  | 11 | 119691272 | T | C | 0.117  | 0.9071 | + | 0      | 0     | 0 | 1      |
| rs601366    | 11 | 119883621 | C | T | 0.117  | 0.9072 | + | 0      | 0     | 0 | 1      |
| rs612969    | 11 | 120989335 | G | A | -0.117 | 0.9072 | - | 0      | 0     | 0 | 1      |
| rs552043    | 11 | 116325990 | T | C | -0.116 | 0.9074 | - | 0      | 0     | 0 | 1      |
| rs75275400  | 11 | 117529676 | C | T | 0.116  | 0.9074 | + | 0      | 0     | 0 | 1      |
| rs113975105 | 11 | 118836606 | G | C | -0.116 | 0.9075 | + | -168.4 | 1.118 | 1 | 0.2904 |
| rs12787035  | 11 | 121082690 | A | G | -0.116 | 0.9077 | - | 0      | 0     | 0 | 1      |
| rs34336740  | 11 | 117662605 | G | C | 0.116  | 0.9077 | + | 0      | 0.013 | 1 | 0.9107 |
| rs61372904  | 11 | 116599900 | G | A | -0.116 | 0.9078 | + | -71.6  | 1.748 | 1 | 0.1862 |
| rs11217458  | 11 | 119620940 | A | G | 0.116  | 0.9079 | + | 0      | 0     | 0 | 1      |
| rs12421491  | 11 | 119834296 | T | C | -0.116 | 0.908  | - | 0      | 0     | 0 | 1      |
| rs4938340   | 11 | 116980622 | A | G | -0.116 | 0.908  | - | 0      | 0     | 0 | 1      |
| rs61905464  | 11 | 117001384 | A | G | -0.116 | 0.908  | - | 0      | 0     | 0 | 1      |
| rs10892483  | 11 | 119748404 | C | G | 0.115  | 0.9082 | + | 0      | 0     | 0 | 1      |
| rs2735183   | 11 | 117015195 | C | T | 0.115  | 0.9082 | + | 0      | 0     | 0 | 1      |
| rs11218108  | 11 | 120878916 | T | C | 0.115  | 0.9084 | + | 0      | 0     | 0 | 1      |
| rs6589732   | 11 | 119185347 | A | G | -0.115 | 0.9084 | - | 0      | 0     | 0 | 1      |
| rs117397221 | 11 | 120018785 | T | C | -0.115 | 0.9086 | - | 0      | 0     | 0 | 1      |
| rs1793169   | 11 | 118070264 | G | A | 0.115  | 0.9086 | + | 0      | 0     | 0 | 1      |
| rs11216887  | 11 | 118420736 | C | T | 0.115  | 0.9087 | + | 0      | 0.005 | 1 | 0.9421 |
| rs4936570   | 11 | 120834573 | T | C | -0.115 | 0.9088 | + | 0      | 0.191 | 1 | 0.6623 |
| rs11605919  | 11 | 119902691 | C | T | 0.114  | 0.9089 | + | 0      | 0     | 0 | 1      |
| rs543181    | 11 | 120855930 | A | G | -0.114 | 0.9091 | + | 0      | 0.191 | 1 | 0.6624 |
| rs488962    | 11 | 117072525 | T | C | 0.114  | 0.9092 | + | 0      | 0     | 0 | 1      |
| rs11217133  | 11 | 118928249 | A | G | 0.114  | 0.9093 | + | 0      | 0     | 0 | 1      |
| rs117819665 | 11 | 116393781 | T | C | -0.114 | 0.9093 | - | 0      | 0     | 0 | 1      |
| rs660083    | 11 | 116720829 | C | G | -0.114 | 0.9095 | - | 0      | 0     | 0 | 1      |
| rs11216357  | 11 | 117200753 | G | T | -0.113 | 0.9097 | - | 0      | 0     | 0 | 1      |
| rs12271220  | 11 | 117664373 | A | G | 0.113  | 0.9098 | + | 0      | 0.012 | 1 | 0.9128 |
| rs3819108   | 11 | 117973576 | A | G | 0.113  | 0.9098 | + | 0      | 0.085 | 1 | 0.7711 |
| rs10750155  | 11 | 119434032 | T | A | -0.113 | 0.9099 | - | 0      | 0     | 0 | 1      |
| rs10790311  | 11 | 119433005 | T | C | -0.113 | 0.9099 | - | 0      | 0     | 0 | 1      |
| rs10790312  | 11 | 119434275 | T | C | -0.113 | 0.9099 | - | 0      | 0     | 0 | 1      |
| rs10892402  | 11 | 119433521 | G | A | -0.113 | 0.9099 | - | 0      | 0     | 0 | 1      |

|             |    |           |   |   |        |        |    |        |       |   |         |
|-------------|----|-----------|---|---|--------|--------|----|--------|-------|---|---------|
| rs10892403  | 11 | 119434843 | A | C | -0.113 | 0.9099 | -? | 0      | 0     | 0 | 1       |
| rs12802764  | 11 | 116474555 | A | G | -0.113 | 0.9099 | -? | 0      | 0     | 0 | 1       |
| rs2368425   | 11 | 119434468 | T | G | -0.113 | 0.9099 | -? | 0      | 0     | 0 | 1       |
| rs4018655   | 11 | 119434711 | A | G | -0.113 | 0.9099 | -? | 0      | 0     | 0 | 1       |
| rs67163042  | 11 | 118050779 | G | A | 0.113  | 0.9099 | +- | 0      | 0.415 | 1 | 0.5194  |
| rs17119713  | 11 | 116338675 | G | T | -0.113 | 0.91   | -? | 0      | 0     | 0 | 1       |
| rs142239919 | 11 | 117339203 | G | A | -0.113 | 0.9101 | -? | 0      | 0     | 0 | 1       |
| rs4938694   | 11 | 119495871 | A | G | -0.113 | 0.9101 | -? | 0      | 0     | 0 | 1       |
| rs74491080  | 11 | 120991447 | T | C | 0.113  | 0.9101 | +  | 0      | 0     | 0 | 1       |
| rs7951065   | 11 | 119495352 | C | T | -0.113 | 0.9101 | -? | 0      | 0     | 0 | 1       |
| rs7951484   | 11 | 119495527 | G | A | -0.113 | 0.9101 | -? | 0      | 0     | 0 | 1       |
| rs74830     | 11 | 117090558 | T | C | 0.113  | 0.9102 | +  | 0      | 0     | 0 | 1       |
| rs4388923   | 11 | 117973558 | A | C | 0.113  | 0.9104 | +- | 0      | 0.084 | 1 | 0.7714  |
| rs5092      | 11 | 116693464 | C | T | -0.112 | 0.9105 | -? | 0      | 0     | 0 | 1       |
| rs655499    | 11 | 118063479 | G | A | 0.112  | 0.9105 | +  | 0      | 0.064 | 1 | 0.8001  |
| rs2845658   | 11 | 119434753 | A | G | 0.112  | 0.9106 | +  | 0      | 0     | 0 | 1       |
| rs10790223  | 11 | 117800700 | C | T | 0.112  | 0.9107 | +  | -138.1 | 1.26  | 1 | 0.2616  |
| rs77279864  | 11 | 118017765 | T | C | 0.112  | 0.9107 | +  | 0      | 0     | 0 | 1       |
| rs12421205  | 11 | 117232156 | G | C | 0.112  | 0.9108 | +  | 0      | 0     | 0 | 1       |
| rs12421494  | 11 | 117232233 | A | G | 0.112  | 0.9108 | +  | 0      | 0     | 0 | 1       |
| rs111453105 | 11 | 116281901 | A | G | -0.112 | 0.9109 | -? | 0      | 0     | 0 | 1       |
| rs521171    | 11 | 117064693 | C | G | -0.112 | 0.9109 | -? | 0      | 0     | 0 | 1       |
| rs7104002   | 11 | 117575862 | C | T | 0.112  | 0.911  | +  | 0      | 0     | 0 | 1       |
| rs72999486  | 11 | 118526691 | T | C | 0.112  | 0.911  | ++ | 0      | 0.009 | 1 | 0.9243  |
| rs542671    | 11 | 116323001 | A | G | 0.112  | 0.9111 | +  | 0      | 0     | 0 | 1       |
| rs560801    | 11 | 116331960 | C | A | 0.112  | 0.9112 | +  | 0      | 0     | 0 | 1       |
| rs45443099  | 11 | 118254710 | G | A | 0.111  | 0.9113 | +  | -8     | 2.778 | 1 | 0.09557 |
| rs4936463   | 11 | 118975355 | A | G | -0.111 | 0.9113 | -? | 0      | 0     | 0 | 1       |
| rs59494484  | 11 | 119445229 | T | C | 0.111  | 0.9113 | +  | 0      | 0     | 0 | 1       |
| rs3132893   | 11 | 118303822 | A | C | -0.111 | 0.9114 | +- | 0      | 0.323 | 1 | 0.5698  |
| rs4936464   | 11 | 118988745 | T | C | -0.111 | 0.912  | -? | 0      | 0     | 0 | 1       |
| rs617139    | 11 | 119880361 | T | C | 0.11   | 0.9122 | +  | 0      | 0     | 0 | 1       |
| rs7933963   | 11 | 118246906 | T | C | 0.11   | 0.9122 | +  | 0      | 0.134 | 1 | 0.7145  |
| rs34850032  | 11 | 117797898 | G | A | 0.11   | 0.9123 | +  | 0      | 0     | 0 | 1       |
| rs74395230  | 11 | 118052662 | T | C | 0.11   | 0.9124 | +- | 0      | 0.386 | 1 | 0.5343  |
| rs4363614   | 11 | 120456605 | A | G | -0.11  | 0.9125 | -? | 0      | 0     | 0 | 1       |
| rs6589673   | 11 | 118557483 | C | A | -0.11  | 0.9125 | +  | 0      | 0.087 | 1 | 0.7682  |
| rs11215958  | 11 | 116355310 | A | G | 0.11   | 0.9126 | +  | 0      | 0     | 0 | 1       |
| rs11216890  | 11 | 118421569 | G | C | 0.11   | 0.9126 | +- | 0      | 0.005 | 1 | 0.9443  |
| rs76105754  | 11 | 121079460 | A | G | -0.11  | 0.9126 | -? | 0      | 0     | 0 | 1       |
| rs76719908  | 11 | 121076820 | C | G | -0.11  | 0.9126 | -? | 0      | 0     | 0 | 1       |
| rs1815811   | 11 | 119059404 | G | A | -0.11  | 0.9127 | -? | 0      | 0     | 0 | 1       |
| rs7949076   | 11 | 119621691 | T | C | 0.11   | 0.9128 | +  | 0      | 0     | 0 | 1       |
| rs11216800  | 11 | 118048885 | G | A | 0.109  | 0.9129 | +- | 0      | 0.386 | 1 | 0.5346  |
| rs2077784   | 11 | 120024874 | A | G | 0.109  | 0.9129 | +  | 0      | 0     | 0 | 1       |
| rs12808524  | 11 | 116890993 | T | C | 0.109  | 0.913  | +  | 0      | 0     | 0 | 1       |
| rs1547885   | 11 | 118105222 | T | C | -0.109 | 0.913  | +  | 0      | 0.107 | 1 | 0.7436  |
| rs664511    | 11 | 119863827 | C | G | -0.109 | 0.9131 | -? | 0      | 0     | 0 | 1       |
| rs60942267  | 11 | 117675364 | T | G | 0.109  | 0.9132 | +  | 0      | 0     | 0 | 1       |
| rs2075547   | 11 | 117068534 | A | C | 0.109  | 0.9135 | +  | 0      | 0     | 0 | 1       |
| rs10502215  | 11 | 116233398 | T | C | -0.108 | 0.9137 | -? | 0      | 0     | 0 | 1       |
| rs11217137  | 11 | 118931030 | G | A | 0.108  | 0.9137 | +  | 0      | 0     | 0 | 1       |
| rs2887244   | 11 | 119434279 | G | T | -0.108 | 0.9139 | -? | 0      | 0     | 0 | 1       |
| rs634867    | 11 | 117411041 | A | G | -0.108 | 0.9139 | -? | 0      | 0     | 0 | 1       |
| rs45508093  | 11 | 118224059 | G | A | 0.108  | 0.914  | +  | 0      | 0     | 0 | 1       |
| rs12800424  | 11 | 116558782 | A | G | 0.108  | 0.9141 | +  | 0      | 0     | 0 | 1       |

|             |    |           |   |   |        |        |    |       |       |   |         |
|-------------|----|-----------|---|---|--------|--------|----|-------|-------|---|---------|
| rs10892394  | 11 | 119429614 | A | G | -0.108 | 0.9142 | -? | 0     | 0     | 0 | 1       |
| rs10892395  | 11 | 119429656 | G | A | -0.108 | 0.9142 | -? | 0     | 0     | 0 | 1       |
| rs10892396  | 11 | 119429662 | G | T | -0.108 | 0.9142 | -? | 0     | 0     | 0 | 1       |
| rs10892397  | 11 | 119430203 | G | A | -0.108 | 0.9142 | -? | 0     | 0     | 0 | 1       |
| rs11217319  | 11 | 119429923 | A | G | -0.108 | 0.9142 | -? | 0     | 0     | 0 | 1       |
| rs12274984  | 11 | 119430266 | A | G | -0.108 | 0.9142 | -? | 0     | 0     | 0 | 1       |
| rs60837248  | 11 | 117192783 | G | A | -0.107 | 0.9144 | -? | 0     | 0     | 0 | 1       |
| rs668468    | 11 | 118011776 | G | A | 0.107  | 0.9144 | ++ | 0     | 0.001 | 1 | 0.9766  |
| rs7128014   | 11 | 116384958 | A | G | 0.107  | 0.9144 | ++ | 0     | 0     | 0 | 1       |
| rs4938791   | 11 | 120055170 | A | G | -0.107 | 0.9146 | -? | 0     | 0     | 0 | 1       |
| rs7113263   | 11 | 117338555 | A | G | 0.107  | 0.9146 | ++ | 0     | 0     | 0 | 1       |
| rs77267645  | 11 | 117551691 | G | A | -0.107 | 0.9147 | -? | 0     | 0     | 0 | 1       |
| rs12418601  | 11 | 120052360 | T | C | 0.107  | 0.915  | ++ | 0     | 0     | 0 | 1       |
| rs17496758  | 11 | 116916175 | A | G | -0.106 | 0.9152 | -? | 0     | 0     | 0 | 1       |
| rs73009178  | 11 | 116411434 | A | C | -0.106 | 0.9153 | -? | 0     | 0     | 0 | 1       |
| rs140186337 | 11 | 119564528 | G | A | -0.106 | 0.9154 | -? | 0     | 0     | 0 | 1       |
| rs79761998  | 11 | 120009308 | A | C | -0.106 | 0.9155 | -? | 0     | 0     | 0 | 1       |
| rs75830246  | 11 | 116968440 | C | T | -0.106 | 0.9157 | +- | 38.8  | 4.902 | 1 | 0.02683 |
| rs111792147 | 11 | 118259162 | A | G | 0.106  | 0.9159 | +- | -9.3  | 2.745 | 1 | 0.09758 |
| rs10892717  | 11 | 121155632 | G | C | -0.105 | 0.916  | -? | 0     | 0     | 0 | 1       |
| rs17119743  | 11 | 116344404 | G | T | -0.105 | 0.9162 | -? | 0     | 0     | 0 | 1       |
| rs56816645  | 11 | 119768855 | G | A | 0.105  | 0.9162 | ++ | 0     | 0     | 0 | 1       |
| rs6589848   | 11 | 120724018 | T | C | 0.105  | 0.9163 | ++ | 0     | 0     | 0 | 1       |
| rs11216667  | 11 | 117876198 | A | C | 0.105  | 0.9164 | ++ | 0     | 0     | 0 | 1       |
| rs11218200  | 11 | 121074615 | C | T | -0.105 | 0.9166 | -? | 0     | 0     | 0 | 1       |
| rs4084221   | 11 | 120405843 | A | G | -0.105 | 0.9166 | -? | 0     | 0     | 0 | 1       |
| rs56061158  | 11 | 117087118 | C | G | 0.104  | 0.9168 | ++ | 0     | 0     | 0 | 1       |
| rs61897870  | 11 | 119870618 | G | C | 0.104  | 0.9169 | ++ | 0     | 0     | 0 | 1       |
| rs11216117  | 11 | 116596129 | A | C | -0.104 | 0.917  | +- | -68.8 | 1.777 | 1 | 0.1825  |
| rs592979    | 11 | 119938682 | G | A | -0.104 | 0.917  | -? | 0     | 0     | 0 | 1       |
| rs671351    | 11 | 117941847 | A | C | -0.104 | 0.917  | -? | 0     | 0     | 0 | 1       |
| rs112563022 | 11 | 118262135 | T | C | 0.104  | 0.9171 | +- | -9.6  | 2.736 | 1 | 0.09811 |
| rs73576276  | 11 | 120117335 | T | C | -0.104 | 0.9171 | -? | 0     | 0     | 0 | 1       |
| rs11216547  | 11 | 117666413 | T | C | 0.104  | 0.9172 | ++ | 0     | 0.011 | 1 | 0.9151  |
| rs56340594  | 11 | 117894618 | T | C | 0.104  | 0.9172 | ++ | 0     | 0     | 0 | 1       |
| rs11216824  | 11 | 118096818 | A | G | -0.104 | 0.9175 | +- | 0     | 0.083 | 1 | 0.7737  |
| rs596440    | 11 | 117548726 | C | T | -0.103 | 0.9177 | -? | 0     | 0     | 0 | 1       |
| rs61905463  | 11 | 116997964 | A | G | -0.103 | 0.9177 | -? | 0     | 0     | 0 | 1       |
| rs637454    | 11 | 117548858 | G | A | -0.103 | 0.9177 | -? | 0     | 0     | 0 | 1       |
| rs11603713  | 11 | 120576984 | G | A | 0.103  | 0.9179 | ++ | 0     | 0     | 0 | 1       |
| rs2368961   | 11 | 119974286 | G | A | 0.103  | 0.918  | ++ | 0     | 0     | 0 | 1       |
| rs76904522  | 11 | 117014863 | A | G | 0.103  | 0.918  | ++ | 0     | 0     | 0 | 1       |
| rs11217962  | 11 | 120545346 | T | G | 0.103  | 0.9181 | ++ | 0     | 0     | 0 | 1       |
| rs11216829  | 11 | 118112911 | A | G | -0.103 | 0.9182 | +- | 0     | 0.192 | 1 | 0.6611  |
| rs76233351  | 11 | 119839224 | A | G | -0.103 | 0.9182 | -? | 0     | 0     | 0 | 1       |
| rs4938406   | 11 | 117427923 | A | G | -0.102 | 0.9184 | -? | 0     | 0     | 0 | 1       |
| rs631191    | 11 | 117916286 | T | C | -0.102 | 0.9185 | +- | 0     | 0.537 | 1 | 0.4635  |
| rs2084897   | 11 | 120026600 | A | G | 0.102  | 0.9189 | ++ | 0     | 0     | 0 | 1       |
| rs2084899   | 11 | 120026810 | C | A | 0.102  | 0.9189 | ++ | 0     | 0     | 0 | 1       |
| rs80044067  | 11 | 117880723 | A | G | -0.102 | 0.919  | -? | 0     | 0     | 0 | 1       |
| rs2845651   | 11 | 119430659 | G | A | 0.102  | 0.9191 | ++ | 0     | 0     | 0 | 1       |
| rs77160958  | 11 | 119389987 | G | A | -0.102 | 0.9191 | -? | 0     | 0     | 0 | 1       |
| rs7935000   | 11 | 120542632 | A | G | 0.101  | 0.9192 | ++ | 0     | 0     | 0 | 1       |
| rs74236045  | 11 | 121077362 | T | C | -0.101 | 0.9193 | -? | 0     | 0     | 0 | 1       |
| rs74942119  | 11 | 117998243 | T | C | 0.101  | 0.9193 | +- | 0     | 0.122 | 1 | 0.727   |
| rs79660582  | 11 | 121073721 | G | T | -0.101 | 0.9193 | -? | 0     | 0     | 0 | 1       |

|              |    |           |   |   |        |        |    |      |       |   |         |
|--------------|----|-----------|---|---|--------|--------|----|------|-------|---|---------|
| rs79833470   | 11 | 121075750 | C | T | -0.101 | 0.9193 | -? | 0    | 0     | 0 | 1       |
| rs58789559   | 11 | 117568636 | A | G | -0.101 | 0.9195 | -? | 0    | 0     | 0 | 1       |
| rs111327557  | 11 | 116817784 | T | C | 0.101  | 0.9196 | +? | 0    | 0     | 0 | 1       |
| rs1317813    | 11 | 120484872 | T | C | 0.101  | 0.9196 | +? | 0    | 0     | 0 | 1       |
| rs10431079   | 11 | 116440678 | G | A | -0.101 | 0.9197 | -+ | 0    | 0.277 | 1 | 0.599   |
| rs7116650    | 11 | 120041917 | T | C | 0.101  | 0.9199 | +? | 0    | 0     | 0 | 1       |
| rs10502228   | 11 | 118113583 | T | C | -0.1   | 0.9201 | -+ | 0    | 0.196 | 1 | 0.6579  |
| rs1467051    | 11 | 119568301 | T | C | -0.1   | 0.9202 | -? | 0    | 0     | 0 | 1       |
| rs12802995   | 11 | 117527473 | A | C | -0.1   | 0.9205 | -? | 0    | 0     | 0 | 1       |
| rs2510450    | 11 | 117229902 | T | C | 0.1    | 0.9205 | +? | 0    | 0     | 0 | 1       |
| rs486366     | 11 | 117228709 | G | A | 0.1    | 0.9205 | +? | 0    | 0     | 0 | 1       |
| rs512730     | 11 | 117231057 | A | T | 0.1    | 0.9205 | +? | 0    | 0     | 0 | 1       |
| rs534296     | 11 | 117228295 | G | A | 0.1    | 0.9205 | +? | 0    | 0     | 0 | 1       |
| rs535366     | 11 | 117226616 | C | T | 0.1    | 0.9205 | +? | 0    | 0     | 0 | 1       |
| rs553303     | 11 | 117224818 | T | C | 0.1    | 0.9205 | +? | 0    | 0     | 0 | 1       |
| rs553506     | 11 | 117224887 | T | C | 0.1    | 0.9205 | +? | 0    | 0     | 0 | 1       |
| rs558854     | 11 | 117228664 | A | G | 0.1    | 0.9205 | +? | 0    | 0     | 0 | 1       |
| rs655389     | 11 | 117224878 | A | G | 0.1    | 0.9205 | +? | 0    | 0     | 0 | 1       |
| rs657666     | 11 | 117224360 | A | G | 0.1    | 0.9205 | +? | 0    | 0     | 0 | 1       |
| rs73000748   | 11 | 119937061 | T | C | 0.1    | 0.9206 | +? | 0    | 0     | 0 | 1       |
| rs10160584   | 11 | 117600136 | G | A | 0.099  | 0.9208 | +? | 0    | 0     | 0 | 1       |
| rs11828302   | 11 | 117574975 | T | A | 0.099  | 0.9208 | +? | 0    | 0     | 0 | 1       |
| rs7342287    | 11 | 118050404 | A | G | 0.099  | 0.9208 | +- | 0    | 0.405 | 1 | 0.5245  |
| rs17119878   | 11 | 116531479 | A | T | 0.099  | 0.921  | +? | 0    | 0     | 0 | 1       |
| rs10790234   | 11 | 117977678 | A | G | -0.099 | 0.9212 | -? | 0    | 0     | 0 | 1       |
| rs1080619    | 11 | 117965105 | G | A | -0.099 | 0.9212 | +- | 0    | 0.041 | 1 | 0.8402  |
| rs1080620    | 11 | 117965082 | A | G | -0.099 | 0.9212 | +- | 0    | 0.041 | 1 | 0.8402  |
| rs534421     | 11 | 116521187 | G | A | -0.099 | 0.9212 | -? | 0    | 0     | 0 | 1       |
| rs71478302   | 11 | 116451880 | G | C | -0.099 | 0.9212 | -? | 0    | 0     | 0 | 1       |
| rs1378582752 | 11 | 116789102 | C | T | 0.099  | 0.9213 | +? | 0    | 0     | 0 | 1       |
| rs4936357    | 11 | 116440163 | T | C | 0.099  | 0.9213 | -+ | 0    | 0.208 | 1 | 0.6481  |
| rs78270838   | 11 | 118072648 | G | A | 0.099  | 0.9214 | +- | 26.7 | 4.091 | 1 | 0.04311 |
| rs7950501    | 11 | 116963965 | T | C | 0.099  | 0.9214 | +? | 0    | 0     | 0 | 1       |
| rs56232713   | 11 | 120960737 | G | C | -0.099 | 0.9215 | -? | 0    | 0     | 0 | 1       |
| rs1995822    | 11 | 119446574 | A | G | -0.098 | 0.9217 | -? | 0    | 0     | 0 | 1       |
| rs10892454   | 11 | 119642827 | G | T | -0.098 | 0.9218 | -? | 0    | 0     | 0 | 1       |
| rs10892253   | 11 | 118559426 | A | C | -0.098 | 0.9221 | -+ | 0    | 0.083 | 1 | 0.7735  |
| rs74236047   | 11 | 121077823 | T | C | -0.097 | 0.9224 | -? | 0    | 0     | 0 | 1       |
| rs611960     | 11 | 118034228 | G | T | 0.097  | 0.9225 | -+ | 0    | 0.482 | 1 | 0.4875  |
| rs4936595    | 11 | 121099539 | A | C | -0.097 | 0.9226 | -+ | 0    | 0.051 | 1 | 0.8214  |
| rs3863305    | 11 | 116853124 | C | T | -0.097 | 0.9227 | -? | 0    | 0     | 0 | 1       |
| rs12419194   | 11 | 120877650 | A | G | 0.097  | 0.9229 | +? | 0    | 0     | 0 | 1       |
| rs689243     | 11 | 116722693 | G | C | -0.097 | 0.9229 | -? | 0    | 0     | 0 | 1       |
| rs11216891   | 11 | 118422234 | T | A | 0.097  | 0.923  | ++ | 0    | 0.002 | 1 | 0.9627  |
| rs11601511   | 11 | 117187551 | C | G | -0.096 | 0.9233 | -? | 0    | 0     | 0 | 1       |
| rs4996911    | 11 | 117973439 | A | G | -0.096 | 0.9233 | +- | 0    | 0.037 | 1 | 0.8469  |
| rs1261967419 | 11 | 116440036 | A | T | -0.096 | 0.9235 | -+ | 0    | 0.274 | 1 | 0.6009  |
| rs7943469    | 11 | 116439792 | G | T | -0.096 | 0.9235 | -+ | 0    | 0.274 | 1 | 0.6009  |
| rs10892596   | 11 | 120541873 | T | C | 0.096  | 0.9236 | +? | 0    | 0     | 0 | 1       |
| rs7107152    | 11 | 117056080 | A | G | -0.095 | 0.924  | -? | 0    | 0     | 0 | 1       |
| rs61898270   | 11 | 120075768 | T | A | -0.095 | 0.9241 | -? | 0    | 0     | 0 | 1       |
| rs11216815   | 11 | 118072232 | A | G | 0.095  | 0.9242 | -+ | 0    | 0.541 | 1 | 0.4621  |
| rs11217970   | 11 | 120551626 | A | G | -0.095 | 0.9243 | -? | 0    | 0     | 0 | 1       |
| rs7106296    | 11 | 116322236 | T | C | 0.095  | 0.9243 | +? | 0    | 0     | 0 | 1       |
| rs4938692    | 11 | 119494489 | T | C | -0.095 | 0.9247 | -? | 0    | 0     | 0 | 1       |
| rs74328581   | 11 | 116918046 | A | C | 0.095  | 0.9247 | +? | 0    | 0     | 0 | 1       |

|              |    |           |   |   |        |        |    |     |       |   |        |
|--------------|----|-----------|---|---|--------|--------|----|-----|-------|---|--------|
| rs608093     | 11 | 117453868 | A | C | -0.094 | 0.9248 | -? | 0   | 0     | 0 | 1      |
| rs11217955   | 11 | 120540060 | T | C | 0.094  | 0.9249 | +? | 0   | 0     | 0 | 1      |
| rs12221818   | 11 | 117228519 | G | A | -0.094 | 0.9249 | -? | 0   | 0     | 0 | 1      |
| rs12419365   | 11 | 118112332 | A | C | -0.094 | 0.9249 | -- | 0   | 0.001 | 1 | 0.9793 |
| rs6589649    | 11 | 118048836 | C | T | 0.094  | 0.925  | +- | 0   | 0.401 | 1 | 0.5265 |
| rs9651688    | 11 | 118107495 | T | C | -0.094 | 0.925  | -+ | 0   | 0.114 | 1 | 0.7356 |
| rs34071565   | 11 | 119712522 | T | A | -0.094 | 0.9251 | -? | 0   | 0     | 0 | 1      |
| rs10431039   | 11 | 116440575 | T | C | 0.094  | 0.9252 | -+ | 0   | 0.211 | 1 | 0.6461 |
| rs2014536    | 11 | 117691145 | C | T | -0.094 | 0.9252 | -? | 0   | 0     | 0 | 1      |
| rs470373     | 11 | 120026271 | T | C | -0.094 | 0.9252 | -? | 0   | 0     | 0 | 1      |
| rs490592     | 11 | 116298367 | A | C | -0.094 | 0.9252 | -? | 0   | 0     | 0 | 1      |
| rs654479     | 11 | 117225134 | A | G | 0.094  | 0.9252 | +? | 0   | 0     | 0 | 1      |
| rs73019237   | 11 | 116250393 | T | C | -0.094 | 0.9254 | -? | 0   | 0     | 0 | 1      |
| rs61907596   | 11 | 116807226 | T | C | -0.093 | 0.9256 | -? | 0   | 0     | 0 | 1      |
| rs3132777    | 11 | 120603857 | A | G | -0.093 | 0.9259 | -? | 0   | 0     | 0 | 1      |
| rs57434987   | 11 | 117401292 | A | C | 0.093  | 0.926  | +? | 0   | 0     | 0 | 1      |
| rs11216028   | 11 | 116464992 | T | G | 0.093  | 0.9261 | +? | 0   | 0     | 0 | 1      |
| rs12787692   | 11 | 119885995 | A | G | -0.093 | 0.9261 | -? | 0   | 0     | 0 | 1      |
| rs642765     | 11 | 118030310 | C | G | -0.093 | 0.9261 | -+ | 0   | 0.113 | 1 | 0.7372 |
| rs2277292    | 11 | 118425419 | T | G | 0.093  | 0.9262 | +- | 0   | 0.005 | 1 | 0.9412 |
| rs2277293    | 11 | 118422868 | T | C | 0.093  | 0.9262 | +- | 0   | 0.024 | 1 | 0.8759 |
| rs11217310   | 11 | 119419568 | C | G | 0.093  | 0.9263 | +? | 0   | 0     | 0 | 1      |
| rs1295453503 | 11 | 116272249 | T | C | -0.093 | 0.9263 | -? | 0   | 0     | 0 | 1      |
| rs599411     | 11 | 117422262 | G | T | -0.093 | 0.9263 | -? | 0   | 0     | 0 | 1      |
| rs76050019   | 11 | 118051857 | C | T | 0.092  | 0.9263 | +- | 0   | 0.374 | 1 | 0.541  |
| rs77786799   | 11 | 120095847 | T | C | -0.093 | 0.9263 | -? | 0   | 0     | 0 | 1      |
| rs7927676    | 11 | 118051323 | G | C | 0.092  | 0.9263 | +- | 0   | 0.374 | 1 | 0.541  |
| rs3863304    | 11 | 116853123 | G | A | -0.092 | 0.9264 | -? | 0   | 0     | 0 | 1      |
| rs4936369    | 11 | 117141469 | C | T | 0.092  | 0.9264 | +? | 0   | 0     | 0 | 1      |
| rs1941637    | 11 | 117999443 | A | C | -0.092 | 0.9268 | -? | 0   | 0     | 0 | 1      |
| rs61905072   | 11 | 116581259 | T | C | -0.091 | 0.9271 | -? | 0   | 0     | 0 | 1      |
| rs2845712    | 11 | 117774291 | A | C | 0.091  | 0.9273 | +? | 0   | 0     | 0 | 1      |
| rs608444     | 11 | 118986630 | G | A | 0.091  | 0.9275 | +? | 0   | 0     | 0 | 1      |
| rs680424     | 11 | 117441621 | C | G | 0.091  | 0.9275 | +? | 0   | 0     | 0 | 1      |
| rs11218049   | 11 | 120770075 | G | A | 0.091  | 0.9277 | +? | 0   | 0     | 0 | 1      |
| rs11822370   | 11 | 117961734 | G | A | 0.091  | 0.9277 | +- | 0   | 0.127 | 1 | 0.7218 |
| rs1715422    | 11 | 118104577 | C | T | -0.091 | 0.9277 | -+ | 0   | 0.133 | 1 | 0.7156 |
| rs1793159    | 11 | 118104569 | A | C | -0.091 | 0.9277 | -+ | 0   | 0.133 | 1 | 0.7156 |
| rs150954345  | 11 | 119985011 | G | A | -0.091 | 0.9278 | -? | 0   | 0     | 0 | 1      |
| rs4338560    | 11 | 118143368 | T | C | 0.091  | 0.9278 | -+ | -33 | 2.255 | 1 | 0.1332 |
| rs12802402   | 11 | 120023505 | T | C | 0.09   | 0.9279 | +? | 0   | 0     | 0 | 1      |
| rs525110     | 11 | 117411392 | G | A | -0.09  | 0.928  | -? | 0   | 0     | 0 | 1      |
| rs679223     | 11 | 117412621 | A | G | -0.09  | 0.928  | -? | 0   | 0     | 0 | 1      |
| rs77346825   | 11 | 117597518 | A | G | 0.09   | 0.928  | +? | 0   | 0     | 0 | 1      |
| rs78033613   | 11 | 119371772 | A | G | -0.09  | 0.928  | -? | 0   | 0     | 0 | 1      |
| rs7125517    | 11 | 117317124 | C | A | 0.09   | 0.9282 | +? | 0   | 0     | 0 | 1      |
| rs11216828   | 11 | 118111676 | A | T | -0.09  | 0.9284 | -+ | 0   | 0.168 | 1 | 0.6821 |
| rs2186780    | 11 | 118605451 | T | C | -0.09  | 0.9284 | -- | 0   | 0     | 1 | 0.9904 |
| rs10892548   | 11 | 120074851 | A | G | 0.09   | 0.9285 | +? | 0   | 0     | 0 | 1      |
| rs11217968   | 11 | 120550229 | G | A | -0.09  | 0.9285 | -? | 0   | 0     | 0 | 1      |
| rs485778     | 11 | 116312958 | A | G | -0.09  | 0.9285 | -? | 0   | 0     | 0 | 1      |
| rs506836     | 11 | 117412453 | T | C | -0.09  | 0.9286 | -? | 0   | 0     | 0 | 1      |
| rs67877251   | 11 | 117680407 | G | A | -0.09  | 0.9286 | -? | 0   | 0     | 0 | 1      |
| rs4938693    | 11 | 119494587 | T | C | -0.089 | 0.9288 | -? | 0   | 0     | 0 | 1      |
| rs117190595  | 11 | 120887214 | T | A | -0.089 | 0.929  | -? | 0   | 0     | 0 | 1      |
| rs35251396   | 11 | 117800033 | A | G | -0.089 | 0.929  | -? | 0   | 0     | 0 | 1      |

|              |    |           |   |   |        |        |    |       |       |   |        |
|--------------|----|-----------|---|---|--------|--------|----|-------|-------|---|--------|
| rs12798473   | 11 | 119494885 | T | C | -0.089 | 0.9293 | -? | 0     | 0     | 0 | 1      |
| rs79163278   | 11 | 119781157 | C | T | -0.089 | 0.9294 | -? | 0     | 0     | 0 | 1      |
| rs1171461    | 11 | 118522179 | A | G | -0.089 | 0.9295 | -+ | 0     | 0.775 | 1 | 0.3787 |
| rs636530     | 11 | 117421858 | G | A | -0.088 | 0.9295 | -? | 0     | 0     | 0 | 1      |
| rs11217950   | 11 | 120537349 | A | T | 0.088  | 0.9296 | +? | 0     | 0     | 0 | 1      |
| rs112667243  | 11 | 120122628 | T | C | -0.088 | 0.9297 | -? | 0     | 0     | 0 | 1      |
| rs504339     | 11 | 116316963 | A | G | 0.088  | 0.9298 | +? | 0     | 0     | 0 | 1      |
| rs1046727798 | 11 | 119822450 | G | A | -0.088 | 0.93   | -? | 0     | 0     | 0 | 1      |
| rs10892060   | 11 | 116881662 | C | A | 0.088  | 0.9302 | +? | 0     | 0     | 0 | 1      |
| rs73018459   | 11 | 117689383 | T | C | -0.088 | 0.9302 | -? | 0     | 0     | 0 | 1      |
| rs11217315   | 11 | 119425163 | A | G | 0.087  | 0.9304 | +? | 0     | 0     | 0 | 1      |
| rs35120633   | 11 | 116655600 | A | G | 0.087  | 0.9305 | +- | -90.1 | 1.578 | 1 | 0.2091 |
| rs4996910    | 11 | 117973454 | A | G | -0.087 | 0.9305 | +- | 0     | 0.034 | 1 | 0.853  |
| rs55857590   | 11 | 118425063 | G | A | 0.087  | 0.9307 | +- | 0     | 0.003 | 1 | 0.9549 |
| rs11216103   | 11 | 116574488 | A | G | 0.086  | 0.9311 | +? | 0     | 0     | 0 | 1      |
| rs12419025   | 11 | 120046336 | T | A | 0.086  | 0.9311 | +? | 0     | 0     | 0 | 1      |
| rs10892076   | 11 | 116988936 | G | A | -0.086 | 0.9313 | -? | 0     | 0     | 0 | 1      |
| rs17490842   | 11 | 116359615 | T | C | 0.086  | 0.9313 | +? | 0     | 0     | 0 | 1      |
| rs597686     | 11 | 117361861 | T | C | -0.086 | 0.9313 | -? | 0     | 0     | 0 | 1      |
| rs10892404   | 11 | 119435011 | C | G | -0.086 | 0.9315 | -? | 0     | 0     | 0 | 1      |
| rs10892405   | 11 | 119435047 | G | A | -0.086 | 0.9315 | -? | 0     | 0     | 0 | 1      |
| rs12785238   | 11 | 119358692 | C | T | 0.086  | 0.9315 | +? | 0     | 0     | 0 | 1      |
| rs17552226   | 11 | 118927907 | G | C | 0.086  | 0.9316 | +? | 0     | 0     | 0 | 1      |
| rs10892465   | 11 | 119659753 | C | T | -0.086 | 0.9317 | -? | 0     | 0     | 0 | 1      |
| rs11217499   | 11 | 119651089 | T | C | -0.086 | 0.9317 | -? | 0     | 0     | 0 | 1      |
| rs10750153   | 11 | 119432823 | T | C | -0.085 | 0.932  | -? | 0     | 0     | 0 | 1      |
| rs1715421    | 11 | 118105233 | C | T | -0.085 | 0.9321 | -+ | 0     | 0.13  | 1 | 0.7179 |
| rs4938687    | 11 | 119451940 | A | G | -0.085 | 0.9322 | -? | 0     | 0     | 0 | 1      |
| rs78785412   | 11 | 119844067 | T | G | -0.085 | 0.9322 | -? | 0     | 0     | 0 | 1      |
| rs494048     | 11 | 118961231 | T | C | 0.085  | 0.9323 | +? | 0     | 0     | 0 | 1      |
| rs11218096   | 11 | 120865621 | T | G | -0.085 | 0.9324 | -? | 0     | 0     | 0 | 1      |
| rs12791621   | 11 | 120025443 | G | A | 0.085  | 0.9324 | +? | 0     | 0     | 0 | 1      |
| rs544274     | 11 | 117341030 | G | A | 0.085  | 0.9324 | +? | 0     | 0     | 0 | 1      |
| rs640323     | 11 | 118010890 | C | G | 0.085  | 0.9324 | -+ | 0     | 0.069 | 1 | 0.7932 |
| rs11607627   | 11 | 116432670 | A | T | -0.085 | 0.9326 | -? | 0     | 0     | 0 | 1      |
| rs79820203   | 11 | 118051010 | C | T | 0.085  | 0.9326 | +- | 0     | 0.368 | 1 | 0.5439 |
| rs10892218   | 11 | 117982289 | T | G | 0.084  | 0.9327 | +? | 0     | 0     | 0 | 1      |
| rs1263055    | 11 | 116577043 | A | G | 0.084  | 0.9327 | +? | 0     | 0     | 0 | 1      |
| rs494965     | 11 | 120053650 | T | C | -0.084 | 0.9327 | -? | 0     | 0     | 0 | 1      |
| rs6589797    | 11 | 119971337 | C | T | -0.084 | 0.9329 | -? | 0     | 0     | 0 | 1      |
| rs11216774   | 11 | 117993836 | A | G | -0.084 | 0.933  | -? | 0     | 0     | 0 | 1      |
| rs6589557    | 11 | 116537761 | T | C | 0.084  | 0.933  | +? | 0     | 0     | 0 | 1      |
| rs6589558    | 11 | 116537942 | A | G | 0.084  | 0.933  | +? | 0     | 0     | 0 | 1      |
| rs7110327    | 11 | 117992910 | A | G | -0.084 | 0.933  | -? | 0     | 0     | 0 | 1      |
| rs11216048   | 11 | 116495059 | G | A | 0.084  | 0.9331 | +? | 0     | 0     | 0 | 1      |
| rs11216049   | 11 | 116495175 | C | T | 0.084  | 0.9331 | +? | 0     | 0     | 0 | 1      |
| rs11216050   | 11 | 116495314 | T | C | 0.084  | 0.9331 | +? | 0     | 0     | 0 | 1      |
| rs56403966   | 11 | 118425051 | A | G | 0.084  | 0.9331 | +- | 0     | 0.003 | 1 | 0.9547 |
| rs112895963  | 11 | 116937159 | T | A | 0.084  | 0.9332 | +? | 0     | 0     | 0 | 1      |
| rs35409990   | 11 | 118109196 | A | G | -0.084 | 0.9333 | -+ | 0     | 0.121 | 1 | 0.7284 |
| rs9651667    | 11 | 118108679 | G | C | -0.084 | 0.9333 | -+ | 0     | 0.121 | 1 | 0.7284 |
| rs35048090   | 11 | 117531395 | T | C | -0.084 | 0.9334 | -? | 0     | 0     | 0 | 1      |
| rs36067343   | 11 | 117531569 | G | T | -0.084 | 0.9334 | -? | 0     | 0     | 0 | 1      |
| rs11218216   | 11 | 121103527 | C | T | -0.083 | 0.9335 | -+ | 0     | 0.044 | 1 | 0.8337 |
| rs479601     | 11 | 117440171 | G | A | 0.083  | 0.9335 | +? | 0     | 0     | 0 | 1      |
| rs11217308   | 11 | 119410158 | T | C | 0.083  | 0.9336 | +? | 0     | 0     | 0 | 1      |

|              |    |           |   |   |        |        |    |       |       |   |         |
|--------------|----|-----------|---|---|--------|--------|----|-------|-------|---|---------|
| rs2276123    | 11 | 117965595 | T | C | -0.082 | 0.9343 | +- | 0     | 0.044 | 1 | 0.8335  |
| rs12272004   | 11 | 116603724 | A | C | -0.082 | 0.9346 | +- | -83.7 | 1.633 | 1 | 0.2013  |
| rs56264624   | 11 | 116337814 | A | G | -0.082 | 0.9346 | -? | 0     | 0     | 0 | 1       |
| rs541407     | 11 | 116313753 | C | T | 0.082  | 0.9347 | +  | 0     | 0     | 0 | 1       |
| rs10736493   | 11 | 118518021 | G | T | -0.082 | 0.9348 | -+ | 0     | 0.172 | 1 | 0.6787  |
| rs10082646   | 11 | 120541660 | C | T | 0.082  | 0.9349 | +  | 0     | 0     | 0 | 1       |
| rs11217522   | 11 | 119690671 | T | G | -0.081 | 0.9352 | -+ | 0     | 0.148 | 1 | 0.7     |
| rs1793167    | 11 | 118102058 | T | C | -0.081 | 0.9352 | -+ | 0     | 0.483 | 1 | 0.487   |
| rs61906078   | 11 | 116529313 | A | G | 0.081  | 0.9352 | +  | 0     | 0     | 0 | 1       |
| rs73014327   | 11 | 117196583 | C | T | -0.081 | 0.9352 | -? | 0     | 0     | 0 | 1       |
| rs4936611    | 11 | 121158509 | T | C | -0.081 | 0.9353 | -? | 0     | 0     | 0 | 1       |
| rs527290     | 11 | 118515616 | T | C | -0.081 | 0.9353 | -+ | 0     | 0.524 | 1 | 0.4693  |
| rs1110704    | 11 | 119974641 | A | G | 0.081  | 0.9354 | +  | 0     | 0     | 0 | 1       |
| rs11216242   | 11 | 116901549 | G | A | -0.081 | 0.9356 | -? | 0     | 0     | 0 | 1       |
| rs10892058   | 11 | 116876621 | C | T | 0.081  | 0.9358 | +  | 0     | 0     | 0 | 1       |
| rs12365332   | 11 | 117998038 | T | C | -0.081 | 0.9358 | -? | 0     | 0     | 0 | 1       |
| rs537323     | 11 | 117226849 | T | C | 0.081  | 0.9358 | +  | 0     | 0     | 0 | 1       |
| rs626151     | 11 | 120034170 | T | G | 0.081  | 0.9358 | +  | 0     | 0     | 0 | 1       |
| rs10790257   | 11 | 118561858 | C | G | -0.08  | 0.9359 | -+ | 0     | 0.099 | 1 | 0.7528  |
| rs2727790    | 11 | 116688383 | A | G | 0.08   | 0.9359 | +- | 4.9   | 3.155 | 1 | 0.07571 |
| rs11216853   | 11 | 118200201 | T | A | 0.08   | 0.936  | -+ | 0     | 0.088 | 1 | 0.7663  |
| rs567053     | 11 | 117430931 | A | G | -0.08  | 0.9361 | -? | 0     | 0     | 0 | 1       |
| rs75893552   | 11 | 117998236 | A | G | -0.08  | 0.9362 | -? | 0     | 0     | 0 | 1       |
| rs7118777    | 11 | 119427857 | C | A | -0.08  | 0.9363 | -? | 0     | 0     | 0 | 1       |
| rs528720     | 11 | 117227686 | A | G | 0.08   | 0.9364 | +  | 0     | 0     | 0 | 1       |
| rs11217675   | 11 | 119949999 | C | T | -0.079 | 0.9367 | -? | 0     | 0     | 0 | 1       |
| rs61902671   | 11 | 120544352 | A | C | -0.079 | 0.9367 | -? | 0     | 0     | 0 | 1       |
| rs111942423  | 11 | 118429764 | G | T | 0.079  | 0.937  | +- | 0     | 0.021 | 1 | 0.8859  |
| rs75839534   | 11 | 121089547 | A | G | -0.079 | 0.937  | -? | 0     | 0     | 0 | 1       |
| rs501021     | 11 | 120000872 | T | C | -0.079 | 0.9371 | -? | 0     | 0     | 0 | 1       |
| rs77127262   | 11 | 119843716 | T | C | -0.079 | 0.9373 | -? | 0     | 0     | 0 | 1       |
| rs1190080879 | 11 | 119493873 | G | T | -0.078 | 0.9375 | -? | 0     | 0     | 0 | 1       |
| rs2622934    | 11 | 117014862 | G | T | 0.078  | 0.9377 | +  | 0     | 0     | 0 | 1       |
| rs561498     | 11 | 120002927 | C | T | 0.078  | 0.9378 | +  | 0     | 0     | 0 | 1       |
| rs79162717   | 11 | 119765750 | G | A | 0.078  | 0.9378 | +  | 0     | 0     | 0 | 1       |
| rs4938695    | 11 | 119496085 | T | C | -0.078 | 0.9379 | -? | 0     | 0     | 0 | 1       |
| rs10892593   | 11 | 120539410 | T | C | 0.078  | 0.938  | +  | 0     | 0     | 0 | 1       |
| rs10790310   | 11 | 119432935 | T | C | -0.078 | 0.9381 | -? | 0     | 0     | 0 | 1       |
| rs117114471  | 11 | 119858685 | A | G | -0.077 | 0.9383 | -? | 0     | 0     | 0 | 1       |
| rs1560409    | 11 | 121160060 | C | G | -0.077 | 0.9383 | -? | 0     | 0     | 0 | 1       |
| rs17124767   | 11 | 120963641 | C | T | 0.077  | 0.9383 | +  | 0     | 0     | 0 | 1       |
| rs4938769    | 11 | 119948566 | T | C | -0.077 | 0.9383 | -? | 0     | 0     | 0 | 1       |
| rs117080901  | 11 | 116422645 | A | G | 0.077  | 0.9384 | +  | 0     | 0     | 0 | 1       |
| rs491300     | 11 | 117442684 | G | T | 0.077  | 0.9385 | +  | 0     | 0     | 0 | 1       |
| rs568466     | 11 | 116331957 | C | T | 0.077  | 0.9385 | +  | 0     | 0     | 0 | 1       |
| rs497744     | 11 | 117368158 | T | G | -0.077 | 0.9388 | -? | 0     | 0     | 0 | 1       |
| rs1052121    | 11 | 119178050 | G | C | -0.077 | 0.9389 | -+ | 0     | 0.839 | 1 | 0.3595  |
| rs11216227   | 11 | 116878597 | C | G | 0.077  | 0.939  | +  | 0     | 0     | 0 | 1       |
| rs12281346   | 11 | 117296892 | C | G | -0.077 | 0.939  | -? | 0     | 0     | 0 | 1       |
| rs656308     | 11 | 118031206 | T | G | -0.077 | 0.939  | -+ | 0     | 0.176 | 1 | 0.6753  |
| rs12799836   | 11 | 120871452 | G | A | -0.076 | 0.9391 | -? | 0     | 0     | 0 | 1       |
| rs7127881    | 11 | 116880798 | G | A | 0.076  | 0.9391 | +  | 0     | 0     | 0 | 1       |
| rs9326253    | 11 | 119644451 | C | T | 0.076  | 0.9391 | +  | 0     | 0     | 0 | 1       |
| rs118069464  | 11 | 117313626 | C | G | -0.076 | 0.9393 | -? | 0     | 0     | 0 | 1       |
| rs55703909   | 11 | 116984866 | A | G | -0.076 | 0.9394 | -? | 0     | 0     | 0 | 1       |
| rs7121313    | 11 | 117729680 | A | G | -0.076 | 0.9395 | -? | 0     | 0     | 0 | 1       |

|              |    |           |   |   |        |        |    |       |       |   |        |
|--------------|----|-----------|---|---|--------|--------|----|-------|-------|---|--------|
| rs11217954   | 11 | 120538307 | C | G | -0.076 | 0.9396 | -? | 0     | 0     | 0 | 1      |
| rs2276126    | 11 | 117965783 | G | A | -0.076 | 0.9397 | +- | 0     | 0.046 | 1 | 0.8304 |
| rs4514434    | 11 | 119492274 | C | T | -0.076 | 0.9398 | -? | 0     | 0     | 0 | 1      |
| rs56075010   | 11 | 116484610 | A | G | -0.076 | 0.9398 | -? | 0     | 0     | 0 | 1      |
| rs111993696  | 11 | 118282448 | A | G | 0.075  | 0.94   | ++ | -24.4 | 2.412 | 1 | 0.1204 |
| rs79579780   | 11 | 119405392 | G | C | -0.075 | 0.9401 | -? | 0     | 0     | 0 | 1      |
| rs2276424    | 11 | 118209960 | A | C | 0.075  | 0.9404 | ++ | 0     | 0.115 | 1 | 0.7341 |
| rs4575311    | 11 | 116904357 | G | A | -0.075 | 0.9404 | -? | 0     | 0     | 0 | 1      |
| rs1248452864 | 11 | 116872263 | G | A | 0.075  | 0.9406 | ++ | 0     | 0     | 0 | 1      |
| rs17120233   | 11 | 116871223 | G | A | 0.075  | 0.9406 | ++ | 0     | 0     | 0 | 1      |
| rs77250716   | 11 | 116877353 | C | T | 0.075  | 0.9406 | ++ | 0     | 0     | 0 | 1      |
| rs522885     | 11 | 117282800 | G | T | 0.074  | 0.9407 | ++ | 0     | 0     | 0 | 1      |
| rs11602880   | 11 | 116322769 | A | G | 0.074  | 0.9408 | ++ | 0     | 0     | 0 | 1      |
| rs61601696   | 11 | 120548768 | C | T | -0.074 | 0.9408 | -? | 0     | 0     | 0 | 1      |
| rs61900463   | 11 | 119974582 | G | C | 0.074  | 0.9409 | ++ | 0     | 0     | 0 | 1      |
| rs4938733    | 11 | 119732418 | C | G | -0.074 | 0.941  | -? | 0     | 0     | 0 | 1      |
| rs7131351    | 11 | 116853606 | G | A | -0.074 | 0.941  | -? | 0     | 0     | 0 | 1      |
| rs7932158    | 11 | 120550430 | C | T | -0.074 | 0.941  | -? | 0     | 0     | 0 | 1      |
| rs625573     | 11 | 119937400 | C | G | -0.074 | 0.9411 | -? | 0     | 0     | 0 | 1      |
| rs4938626    | 11 | 118974588 | T | G | -0.073 | 0.9415 | -? | 0     | 0     | 0 | 1      |
| rs7926104    | 11 | 116899782 | G | A | -0.073 | 0.9416 | -? | 0     | 0     | 0 | 1      |
| rs4936362    | 11 | 116952200 | T | C | 0.073  | 0.9417 | ++ | 0     | 0     | 0 | 1      |
| rs10790238   | 11 | 117990826 | G | T | -0.073 | 0.9419 | -? | 0     | 0     | 0 | 1      |
| rs11216772   | 11 | 117992183 | A | T | -0.073 | 0.9419 | -? | 0     | 0     | 0 | 1      |
| rs12222838   | 11 | 117991381 | G | A | -0.073 | 0.9419 | -? | 0     | 0     | 0 | 1      |
| rs12361749   | 11 | 117991176 | T | A | -0.073 | 0.9419 | -? | 0     | 0     | 0 | 1      |
| rs12364660   | 11 | 117991183 | G | C | -0.073 | 0.9419 | -? | 0     | 0     | 0 | 1      |
| rs12365797   | 11 | 117993395 | A | G | -0.073 | 0.9419 | -? | 0     | 0     | 0 | 1      |
| rs12576605   | 11 | 117990003 | C | G | -0.073 | 0.9419 | -? | 0     | 0     | 0 | 1      |
| rs76043503   | 11 | 117992763 | G | A | -0.073 | 0.9419 | -? | 0     | 0     | 0 | 1      |
| rs61901429   | 11 | 120724136 | G | A | 0.073  | 0.942  | ++ | 0     | 0     | 0 | 1      |
| rs7122134    | 11 | 119547005 | G | A | 0.073  | 0.942  | ++ | 0     | 0     | 0 | 1      |
| rs666290     | 11 | 117476142 | T | C | -0.072 | 0.9423 | -? | 0     | 0     | 0 | 1      |
| rs7114223    | 11 | 117339276 | A | G | 0.072  | 0.9423 | ++ | 0     | 0     | 0 | 1      |
| rs10891986   | 11 | 116393439 | A | T | 0.072  | 0.9424 | ++ | 0     | 0     | 0 | 1      |
| rs10892594   | 11 | 120540410 | C | A | 0.072  | 0.9424 | ++ | 0     | 0     | 0 | 1      |
| rs657882     | 11 | 117511951 | C | G | -0.072 | 0.9424 | -? | 0     | 0     | 0 | 1      |
| rs653008     | 11 | 118520480 | T | G | -0.072 | 0.9425 | ++ | 0     | 0.549 | 1 | 0.4587 |
| rs10892595   | 11 | 120540687 | T | C | 0.072  | 0.9427 | ++ | 0     | 0     | 0 | 1      |
| rs548890     | 11 | 116312872 | A | G | 0.072  | 0.9427 | ++ | 0     | 0     | 0 | 1      |
| rs11216546   | 11 | 117665021 | T | C | 0.072  | 0.9429 | ++ | 0     | 0.018 | 1 | 0.8939 |
| rs1480227044 | 11 | 116483289 | G | C | -0.072 | 0.9429 | -? | 0     | 0     | 0 | 1      |
| rs75084211   | 11 | 116482973 | A | G | -0.072 | 0.9429 | -? | 0     | 0     | 0 | 1      |
| rs79353638   | 11 | 116482683 | A | G | -0.072 | 0.9429 | -? | 0     | 0     | 0 | 1      |
| rs117013687  | 11 | 117150502 | T | C | -0.071 | 0.9434 | -? | 0     | 0     | 0 | 1      |
| rs141642186  | 11 | 119898644 | T | C | 0.071  | 0.9434 | ++ | 0     | 0     | 0 | 1      |
| rs17492724   | 11 | 116480616 | C | A | -0.071 | 0.9434 | -? | 0     | 0     | 0 | 1      |
| rs56173877   | 11 | 116481208 | A | G | -0.071 | 0.9434 | -? | 0     | 0     | 0 | 1      |
| rs10892059   | 11 | 116881645 | G | A | 0.071  | 0.9435 | ++ | 0     | 0     | 0 | 1      |
| rs61906117   | 11 | 116558916 | A | G | 0.071  | 0.9435 | ++ | 0     | 0     | 0 | 1      |
| rs118118922  | 11 | 117935948 | T | C | 0.071  | 0.9437 | ++ | 0     | 0     | 0 | 1      |
| rs9651684    | 11 | 117966994 | C | G | -0.07  | 0.9438 | +- | 0     | 0.043 | 1 | 0.835  |
| rs10892388   | 11 | 119417101 | A | G | 0.07   | 0.9439 | ++ | 0     | 0     | 0 | 1      |
| rs7949789    | 11 | 120041110 | A | T | 0.07   | 0.9439 | ++ | 0     | 0     | 0 | 1      |
| rs1605557    | 11 | 116342547 | G | A | 0.07   | 0.944  | ++ | 0     | 0     | 0 | 1      |
| rs77610621   | 11 | 118089957 | A | G | 0.07   | 0.944  | ++ | 0     | 0     | 0 | 1      |

|              |    |           |   |   |        |        |    |        |       |   |         |
|--------------|----|-----------|---|---|--------|--------|----|--------|-------|---|---------|
| rs75907072   | 11 | 116233803 | A | T | 0.07   | 0.9441 | +- | -135.4 | 1.274 | 1 | 0.2589  |
| rs12273399   | 11 | 120060102 | T | C | -0.07  | 0.9442 | +- | 0      | 0.51  | 1 | 0.4752  |
| rs1353117537 | 11 | 119828505 | A | T | -0.07  | 0.9443 | -? | 0      | 0     | 0 | 1       |
| rs73613993   | 11 | 118296007 | C | T | 0.07   | 0.9443 | +- | 0      | 0.156 | 1 | 0.6931  |
| rs12276260   | 11 | 119950798 | C | G | 0.07   | 0.9444 | +  | 0      | 0     | 0 | 1       |
| rs12808972   | 11 | 120057972 | A | G | -0.07  | 0.9444 | -? | 0      | 0     | 0 | 1       |
| rs113979111  | 11 | 116983016 | A | G | -0.069 | 0.9446 | -? | 0      | 0     | 0 | 1       |
| rs11217951   | 11 | 120538183 | T | C | -0.069 | 0.9448 | -? | 0      | 0     | 0 | 1       |
| rs1158810726 | 11 | 117154091 | G | T | 0.069  | 0.9449 | +  | 0      | 0     | 0 | 1       |
| rs550767     | 11 | 116487699 | A | C | -0.069 | 0.945  | -? | 0      | 0     | 0 | 1       |
| rs74444640   | 11 | 116528544 | T | C | 0.069  | 0.945  | +  | 0      | 0     | 0 | 1       |
| rs11604327   | 11 | 120572302 | C | A | 0.069  | 0.9451 | +  | 0      | 0     | 0 | 1       |
| rs138177199  | 11 | 116371338 | G | C | 0.069  | 0.9452 | +  | 0      | 0     | 0 | 1       |
| rs35163144   | 11 | 119726313 | G | A | -0.069 | 0.9452 | -? | 0      | 0     | 0 | 1       |
| rs574778     | 11 | 116292263 | C | A | -0.069 | 0.9452 | -? | 0      | 0     | 0 | 1       |
| rs10790258   | 11 | 118561859 | T | G | -0.069 | 0.9453 | +  | 0      | 0.095 | 1 | 0.758   |
| rs76831657   | 11 | 118051082 | G | A | 0.068  | 0.9454 | +- | 0      | 0.361 | 1 | 0.5479  |
| rs10892385   | 11 | 119412922 | A | C | -0.068 | 0.9455 | -? | 0      | 0     | 0 | 1       |
| rs3802863    | 11 | 118099186 | T | C | -0.068 | 0.9455 | +  | 0      | 0.429 | 1 | 0.5126  |
| rs11216451   | 11 | 117424454 | G | A | -0.068 | 0.9456 | -? | 0      | 0     | 0 | 1       |
| rs11218215   | 11 | 121103497 | T | C | -0.068 | 0.9457 | +  | 0      | 0.04  | 1 | 0.8406  |
| rs148205418  | 11 | 120071834 | G | C | -0.068 | 0.946  | -? | 0      | 0     | 0 | 1       |
| rs113784559  | 11 | 116979365 | G | C | -0.067 | 0.9465 | -? | 0      | 0     | 0 | 1       |
| rs947926     | 11 | 117539478 | C | A | 0.067  | 0.9466 | +  | 0      | 0     | 0 | 1       |
| rs112245679  | 11 | 118287622 | G | A | 0.067  | 0.9468 | +  | -30.9  | 2.292 | 1 | 0.13    |
| rs61899017   | 11 | 119771321 | C | T | -0.067 | 0.9468 | -? | 0      | 0     | 0 | 1       |
| rs11217755   | 11 | 120053173 | A | G | 0.067  | 0.9469 | +  | 0      | 0     | 0 | 1       |
| rs76031074   | 11 | 119677419 | A | G | 0.066  | 0.9472 | +  | 0      | 0     | 0 | 1       |
| rs7946257    | 11 | 117053165 | A | G | -0.066 | 0.9473 | -? | 0      | 0     | 0 | 1       |
| rs10790167   | 11 | 116800943 | T | C | -0.066 | 0.9474 | -? | 0      | 0     | 0 | 1       |
| rs10892150   | 11 | 117524543 | C | T | -0.066 | 0.9475 | -? | 0      | 0     | 0 | 1       |
| rs504236     | 11 | 120000263 | T | C | -0.066 | 0.9475 | -? | 0      | 0     | 0 | 1       |
| rs645637     | 11 | 118505090 | A | G | -0.066 | 0.9477 | +  | 0      | 0.474 | 1 | 0.4909  |
| rs7110837    | 11 | 118199295 | A | G | 0.066  | 0.9477 | +  | 0      | 0.096 | 1 | 0.7568  |
| rs11602430   | 11 | 119951327 | G | C | 0.065  | 0.9478 | +  | 0      | 0     | 0 | 1       |
| rs576262     | 11 | 116764436 | C | G | 0.065  | 0.9478 | +- | 59.9   | 7.488 | 1 | 0.00621 |
| rs7129048    | 11 | 118211797 | C | T | -0.065 | 0.9478 | +  | 11.2   | 3.376 | 1 | 0.06613 |
| rs78227947   | 11 | 117996360 | G | T | -0.065 | 0.9478 | -? | 0      | 0     | 0 | 1       |
| rs11218100   | 11 | 120867747 | T | C | -0.065 | 0.9479 | -? | 0      | 0     | 0 | 1       |
| rs6589776    | 11 | 119656449 | A | G | 0.065  | 0.9479 | +  | 0      | 0     | 0 | 1       |
| rs10736498   | 11 | 119412507 | A | G | 0.065  | 0.948  | +  | 0      | 0     | 0 | 1       |
| rs10502232   | 11 | 119790068 | G | A | 0.065  | 0.9484 | +  | 0      | 0     | 0 | 1       |
| rs12279373   | 11 | 116600400 | G | A | -0.064 | 0.9487 | +- | -80.8  | 1.659 | 1 | 0.1977  |
| rs145924639  | 11 | 119497371 | T | C | 0.064  | 0.9487 | +  | 0      | 0     | 0 | 1       |
| rs580872     | 11 | 116310858 | A | G | -0.064 | 0.9487 | -? | 0      | 0     | 0 | 1       |
| rs3741315    | 11 | 118004688 | A | G | -0.064 | 0.9488 | +  | 0      | 0.004 | 1 | 0.9501  |
| rs10892464   | 11 | 119659720 | C | T | 0.064  | 0.9491 | +  | 0      | 0     | 0 | 1       |
| rs11216567   | 11 | 117698483 | G | A | 0.063  | 0.9495 | +  | 0      | 0     | 0 | 1       |
| rs7926282    | 11 | 118605914 | C | A | -0.063 | 0.9495 | -- | 0      | 0.001 | 1 | 0.974   |
| rs10437690   | 11 | 119422756 | G | C | 0.063  | 0.9496 | +  | 0      | 0     | 0 | 1       |
| rs61903421   | 11 | 116961802 | T | A | 0.063  | 0.9498 | +  | 0      | 0     | 0 | 1       |
| rs7950381    | 11 | 116963897 | A | C | 0.063  | 0.9498 | +  | 0      | 0     | 0 | 1       |
| rs12223789   | 11 | 117987041 | A | G | -0.063 | 0.9501 | -? | 0      | 0     | 0 | 1       |
| rs1793155    | 11 | 118098962 | A | G | -0.062 | 0.9502 | +  | 0      | 0.432 | 1 | 0.511   |
| rs1793156    | 11 | 118098890 | C | T | -0.062 | 0.9502 | +  | 0      | 0.432 | 1 | 0.511   |
| rs5132       | 11 | 116702778 | T | C | -0.062 | 0.9502 | +- | -3.3   | 2.904 | 1 | 0.08836 |

|              |    |           |   |   |        |        |    |        |       |   |          |
|--------------|----|-----------|---|---|--------|--------|----|--------|-------|---|----------|
| rs73014407   | 11 | 117529248 | T | C | -0.062 | 0.9502 | -? | 0      | 0     | 0 | 1        |
| rs78701708   | 11 | 117315050 | C | T | -0.062 | 0.9502 | -? | 0      | 0     | 0 | 1        |
| rs12804122   | 11 | 116902616 | C | G | -0.062 | 0.9504 | -? | 0      | 0     | 0 | 1        |
| rs1508097    | 11 | 116468169 | T | A | 0.062  | 0.9506 | +? | 0      | 0     | 0 | 1        |
| rs1941626    | 11 | 117989301 | C | G | -0.062 | 0.9508 | -? | 0      | 0     | 0 | 1        |
| rs61903414   | 11 | 116946788 | T | C | -0.061 | 0.951  | -? | 0      | 0     | 0 | 1        |
| rs12795949   | 11 | 117662138 | A | G | 0.061  | 0.9513 | -+ | 0      | 0.054 | 1 | 0.8156   |
| rs71480353   | 11 | 117538907 | C | G | 0.061  | 0.9513 | +? | 0      | 0     | 0 | 1        |
| rs3825061    | 11 | 118944675 | T | C | 0.061  | 0.9514 | +? | 0      | 0     | 0 | 1        |
| rs17528237   | 11 | 117962275 | T | C | 0.061  | 0.9515 | +- | 0      | 0.117 | 1 | 0.7327   |
| rs10892328   | 11 | 118942654 | A | T | 0.061  | 0.9517 | +? | 0      | 0     | 0 | 1        |
| rs10892587   | 11 | 120450280 | A | C | -0.061 | 0.9517 | -? | 0      | 0     | 0 | 1        |
| rs688456     | 11 | 116722551 | T | G | -0.06  | 0.9518 | -? | 0      | 0     | 0 | 1        |
| rs35624176   | 11 | 116413310 | A | G | 0.06   | 0.9519 | +? | 0      | 0     | 0 | 1        |
| rs538518     | 11 | 119789044 | G | T | -0.06  | 0.9519 | -? | 0      | 0     | 0 | 1        |
| rs948460     | 11 | 117960018 | T | A | 0.06   | 0.9519 | ++ | 0      | 0.001 | 1 | 0.98     |
| rs34874964   | 11 | 117533027 | T | C | -0.06  | 0.9522 | -? | 0      | 0     | 0 | 1        |
| rs61905066   | 11 | 116571608 | G | A | -0.06  | 0.9522 | -? | 0      | 0     | 0 | 1        |
| rs11216277   | 11 | 116987046 | G | A | -0.06  | 0.9523 | -? | 0      | 0     | 0 | 1        |
| rs138697506  | 11 | 116355788 | G | A | 0.06   | 0.9523 | +? | 0      | 0     | 0 | 1        |
| rs11217953   | 11 | 120538217 | A | G | -0.06  | 0.9524 | -? | 0      | 0     | 0 | 1        |
| rs61899020   | 11 | 119778398 | T | C | -0.06  | 0.9524 | -? | 0      | 0     | 0 | 1        |
| rs10790306   | 11 | 119423690 | C | T | 0.06   | 0.9525 | +? | 0      | 0     | 0 | 1        |
| rs10790391   | 11 | 120542279 | A | G | 0.059  | 0.9526 | +? | 0      | 0     | 0 | 1        |
| rs12797009   | 11 | 118826192 | A | C | -0.059 | 0.9526 | -? | 0      | 0     | 0 | 1        |
| rs61905462   | 11 | 116994106 | A | C | -0.059 | 0.9527 | -? | 0      | 0     | 0 | 1        |
| rs17121510   | 11 | 117876155 | G | A | -0.059 | 0.9528 | -? | 0      | 0     | 0 | 1        |
| rs1715420    | 11 | 118105599 | A | T | -0.059 | 0.9531 | -+ | 0      | 0.12  | 1 | 0.7293   |
| rs7943043    | 11 | 120954436 | C | T | 0.058  | 0.9535 | +? | 0      | 0     | 0 | 1        |
| rs874069     | 11 | 120953914 | C | T | 0.058  | 0.9535 | +? | 0      | 0     | 0 | 1        |
| rs11216700   | 11 | 117894782 | T | A | 0.058  | 0.9536 | +? | 0      | 0     | 0 | 1        |
| rs11216703   | 11 | 117894927 | A | C | 0.058  | 0.9536 | +? | 0      | 0     | 0 | 1        |
| rs1892948    | 11 | 116572089 | T | C | -0.058 | 0.9536 | -? | 0      | 0     | 0 | 1        |
| rs141453720  | 11 | 119334649 | C | G | -0.058 | 0.9538 | -? | 0      | 0     | 0 | 1        |
| rs692804     | 11 | 120099368 | T | C | -0.058 | 0.9539 | -? | 0      | 0     | 0 | 1        |
| rs1260808616 | 11 | 118941596 | A | G | 0.058  | 0.954  | +? | 0      | 0     | 0 | 1        |
| rs601318     | 11 | 118519550 | G | C | -0.058 | 0.954  | -+ | 0      | 0.529 | 1 | 0.4671   |
| rs6589659    | 11 | 118191691 | A | C | 0.058  | 0.954  | -+ | 0      | 0.413 | 1 | 0.5203   |
| rs10736501   | 11 | 119437268 | G | A | 0.058  | 0.9541 | +? | 0      | 0     | 0 | 1        |
| rs11217318   | 11 | 119429848 | A | G | -0.058 | 0.9541 | -? | 0      | 0     | 0 | 1        |
| rs509809     | 11 | 119777611 | G | A | 0.058  | 0.9541 | +? | 0      | 0     | 0 | 1        |
| rs45480805   | 11 | 118267903 | A | G | 0.057  | 0.9542 | -+ | -18.1  | 2.541 | 1 | 0.1109   |
| rs664922     | 11 | 117070895 | C | A | -0.057 | 0.9543 | -? | 0      | 0     | 0 | 1        |
| rs590843     | 11 | 119991166 | T | A | -0.057 | 0.9545 | -? | 0      | 0     | 0 | 1        |
| rs17123513   | 11 | 119846442 | A | G | -0.057 | 0.9546 | -? | 0      | 0     | 0 | 1        |
| rs2508559    | 11 | 117580254 | T | C | -0.057 | 0.9546 | -? | 0      | 0     | 0 | 1        |
| rs604245     | 11 | 117580585 | A | G | -0.057 | 0.9546 | -? | 0      | 0     | 0 | 1        |
| rs655086     | 11 | 117580509 | A | G | -0.057 | 0.9546 | -? | 0      | 0     | 0 | 1        |
| rs74609299   | 11 | 119846476 | T | C | -0.057 | 0.9546 | -? | 0      | 0     | 0 | 1        |
| rs11823918   | 11 | 116960497 | C | G | 0.057  | 0.9547 | +? | 0      | 0     | 0 | 1        |
| rs6589656    | 11 | 118095996 | C | G | -0.057 | 0.9547 | -+ | 0      | 0.441 | 1 | 0.5068   |
| rs3132775    | 11 | 120585993 | G | A | -0.057 | 0.9548 | -? | 0      | 0     | 0 | 1        |
| rs112302730  | 11 | 118283383 | A | G | 0.056  | 0.9551 | -+ | -29.8  | 2.31  | 1 | 0.1285   |
| rs11217766   | 11 | 120072666 | A | C | 0.056  | 0.9552 | +? | 0      | 0     | 0 | 1        |
| rs3135506    | 11 | 116662407 | C | G | -0.056 | 0.9552 | +- | -100.8 | 1.494 | 1 | 0.2216   |
| rs595137     | 11 | 116771356 | C | T | -0.056 | 0.9553 | +- | 63     | 8.105 | 1 | 0.004413 |

|              |    |           |   |   |        |        |    |       |        |   |           |
|--------------|----|-----------|---|---|--------|--------|----|-------|--------|---|-----------|
| rs78509462   | 11 | 119841349 | C | T | -0.056 | 0.9553 | -? | 0     | 0      | 0 | 1         |
| rs111763202  | 11 | 118289734 | T | C | 0.056  | 0.9554 | +  | -34.2 | 2.236  | 1 | 0.1349    |
| rs112035668  | 11 | 118290443 | G | A | 0.056  | 0.9554 | +  | -34.2 | 2.236  | 1 | 0.1349    |
| rs3809041    | 11 | 117774560 | C | G | 0.056  | 0.9554 | +  | 0     | 0      | 0 | 1         |
| rs2000868    | 11 | 120544816 | T | C | 0.056  | 0.9555 | +  | 0     | 0      | 0 | 1         |
| rs73612281   | 11 | 118203642 | T | C | 0.056  | 0.9555 | +  | 0     | 0.912  | 1 | 0.3395    |
| rs61903418   | 11 | 116956665 | A | G | 0.056  | 0.9556 | +  | 0     | 0      | 0 | 1         |
| rs11552421   | 11 | 118430519 | T | C | 0.056  | 0.9557 | +  | 0     | 0.034  | 1 | 0.8533    |
| rs12222499   | 11 | 119814422 | T | C | -0.056 | 0.9557 | -? | 0     | 0      | 0 | 1         |
| rs544153     | 11 | 117336280 | A | G | -0.055 | 0.9558 | -? | 0     | 0      | 0 | 1         |
| rs1312372307 | 11 | 118048499 | T | C | 0.055  | 0.9561 | +  | 0     | 0.451  | 1 | 0.502     |
| rs115787357  | 11 | 117064506 | G | T | 0.055  | 0.9562 | +  | 0     | 0      | 0 | 1         |
| rs1263889    | 11 | 117473833 | A | C | 0.055  | 0.9562 | +  | 0     | 0      | 0 | 1         |
| rs11216816   | 11 | 118075152 | A | C | -0.055 | 0.9563 | +  | 0     | 0.269  | 1 | 0.6042    |
| rs11216817   | 11 | 118075474 | T | C | -0.055 | 0.9563 | +  | 0     | 0.269  | 1 | 0.6042    |
| rs1231238253 | 11 | 117101311 | T | C | 0.055  | 0.9563 | +  | 73.1  | 11.152 | 1 | 0.0008395 |
| rs17092726   | 11 | 117996200 | G | A | -0.055 | 0.9565 | -? | 0     | 0      | 0 | 1         |
| rs17311121   | 11 | 119876680 | G | T | 0.054  | 0.9567 | +  | 0     | 0      | 0 | 1         |
| rs637737     | 11 | 118051646 | G | A | 0.054  | 0.9567 | +  | 0     | 0.387  | 1 | 0.5339    |
| rs34929374   | 11 | 120891614 | G | A | 0.054  | 0.9568 | +  | 0     | 0      | 0 | 1         |
| rs1064193    | 11 | 118965338 | A | T | -0.054 | 0.9569 | -? | 0     | 0      | 0 | 1         |
| rs6589644    | 11 | 117959224 | T | C | 0.054  | 0.9569 | ++ | 0     | 0      | 1 | 0.9883    |
| rs3018383    | 11 | 118093359 | A | C | -0.054 | 0.9571 | +  | 0     | 0.438  | 1 | 0.5082    |
| rs7926574    | 11 | 119641049 | C | T | -0.054 | 0.9571 | -? | 0     | 0      | 0 | 1         |
| rs948461     | 11 | 117960138 | T | G | 0.053  | 0.9574 | ++ | 0     | 0.001  | 1 | 0.9768    |
| rs10790175   | 11 | 117034729 | T | C | -0.053 | 0.9576 | -? | 0     | 0      | 0 | 1         |
| rs17119847   | 11 | 116479752 | A | C | -0.053 | 0.9576 | -? | 0     | 0      | 0 | 1         |
| rs472948     | 11 | 120099193 | G | A | -0.053 | 0.9577 | -? | 0     | 0      | 0 | 1         |
| rs11218102   | 11 | 120868460 | C | G | -0.053 | 0.9579 | -? | 0     | 0      | 0 | 1         |
| rs514527     | 11 | 117696720 | G | A | -0.053 | 0.958  | -? | 0     | 0      | 0 | 1         |
| rs11217952   | 11 | 120538215 | T | G | -0.052 | 0.9582 | -? | 0     | 0      | 0 | 1         |
| rs2155855    | 11 | 117974600 | G | A | -0.052 | 0.9582 | -? | 0     | 0      | 0 | 1         |
| rs2155856    | 11 | 117974639 | A | C | -0.052 | 0.9582 | -? | 0     | 0      | 0 | 1         |
| rs628756     | 11 | 120987966 | C | T | -0.052 | 0.9582 | +  | 0     | 0.776  | 1 | 0.3783    |
| rs79754446   | 11 | 117997473 | G | A | -0.052 | 0.9582 | -? | 0     | 0      | 0 | 1         |
| rs11600134   | 11 | 118070788 | A | G | 0.052  | 0.9583 | +  | 0     | 0.578  | 1 | 0.447     |
| rs11216791   | 11 | 118044360 | G | A | 0.052  | 0.9584 | +  | 0     | 0.326  | 1 | 0.568     |
| rs7130031    | 11 | 119492297 | T | C | -0.052 | 0.9585 | -? | 0     | 0      | 0 | 1         |
| rs11216027   | 11 | 116464955 | T | C | 0.052  | 0.9586 | +  | 0     | 0      | 0 | 1         |
| rs1940037    | 11 | 117436095 | T | C | 0.052  | 0.9588 | +  | 0     | 0.012  | 1 | 0.9143    |
| rs10790307   | 11 | 119424157 | C | T | 0.052  | 0.9589 | +  | 0     | 0      | 0 | 1         |
| rs78587763   | 11 | 117400684 | T | C | 0.052  | 0.9589 | +  | 0     | 0      | 0 | 1         |
| rs2120268    | 11 | 118132705 | A | G | -0.051 | 0.959  | +  | 0     | 0.2    | 1 | 0.6548    |
| rs6589847    | 11 | 120715884 | A | G | -0.051 | 0.959  | -? | 0     | 0      | 0 | 1         |
| rs61902674   | 11 | 120548902 | A | C | -0.051 | 0.9592 | -? | 0     | 0      | 0 | 1         |
| rs11217956   | 11 | 120540795 | T | C | 0.051  | 0.9593 | +  | 0     | 0      | 0 | 1         |
| rs11602779   | 11 | 119726873 | A | G | -0.051 | 0.9593 | -? | 0     | 0      | 0 | 1         |
| rs73582578   | 11 | 116336988 | A | C | -0.051 | 0.9595 | -? | 0     | 0      | 0 | 1         |
| rs10892035   | 11 | 116694938 | A | G | -0.05  | 0.9598 | -? | 0     | 0      | 0 | 1         |
| rs60167594   | 11 | 116966878 | C | T | -0.05  | 0.9599 | +  | 74.8  | 11.894 | 1 | 0.0005631 |
| rs144234662  | 11 | 121083487 | T | C | -0.05  | 0.96   | -? | 0     | 0      | 0 | 1         |
| rs10082698   | 11 | 120543440 | G | A | -0.05  | 0.9602 | -? | 0     | 0      | 0 | 1         |
| rs628944     | 11 | 119943275 | A | C | 0.05   | 0.9602 | +  | 0     | 0      | 0 | 1         |
| rs1022783694 | 11 | 116886114 | C | T | -0.05  | 0.9603 | -? | 0     | 0      | 0 | 1         |
| rs12808627   | 11 | 120038717 | T | C | 0.05   | 0.9605 | +  | 0     | 0      | 0 | 1         |
| rs4938354    | 11 | 117051165 | A | G | -0.05  | 0.9605 | -? | 0     | 0      | 0 | 1         |

|             |    |           |   |   |        |        |   |       |        |   |           |
|-------------|----|-----------|---|---|--------|--------|---|-------|--------|---|-----------|
| rs5014624   | 11 | 117731136 | A | G | 0.05   | 0.9605 | + | 0     | 0      | 0 | 1         |
| rs11216684  | 11 | 117888685 | G | A | 0.049  | 0.9606 | + | 0     | 0      | 0 | 1         |
| rs11216686  | 11 | 117888781 | A | T | 0.049  | 0.9606 | + | 0     | 0      | 0 | 1         |
| rs569044    | 11 | 119999191 | A | G | -0.049 | 0.9606 | - | 0     | 0      | 0 | 1         |
| rs73011708  | 11 | 117887528 | C | G | 0.049  | 0.9606 | + | 0     | 0      | 0 | 1         |
| rs78640117  | 11 | 117889685 | T | C | 0.049  | 0.9606 | + | 0     | 0      | 0 | 1         |
| rs10892315  | 11 | 118831727 | C | T | -0.049 | 0.9607 | + | 0     | 0.814  | 1 | 0.3669    |
| rs61905337  | 11 | 117365821 | A | C | 0.049  | 0.9607 | + | 0     | 0      | 0 | 1         |
| rs12225752  | 11 | 120546394 | G | A | 0.049  | 0.9609 | + | 0     | 0      | 0 | 1         |
| rs72488011  | 11 | 117997360 | C | T | 0.049  | 0.9609 | + | 0     | 0      | 0 | 1         |
| rs7928307   | 11 | 116439615 | T | C | -0.049 | 0.9609 | + | 0     | 0.246  | 1 | 0.6198    |
| rs10502240  | 11 | 120547912 | T | C | -0.049 | 0.961  | - | 0     | 0      | 0 | 1         |
| rs10790394  | 11 | 120548076 | C | G | -0.049 | 0.961  | - | 0     | 0      | 0 | 1         |
| rs10790400  | 11 | 120557091 | T | A | -0.049 | 0.961  | - | 0     | 0      | 0 | 1         |
| rs10892605  | 11 | 120546953 | T | C | -0.049 | 0.961  | - | 0     | 0      | 0 | 1         |
| rs11217965  | 11 | 120546914 | T | C | -0.049 | 0.961  | - | 0     | 0      | 0 | 1         |
| rs11603586  | 11 | 120548353 | T | C | -0.049 | 0.961  | - | 0     | 0      | 0 | 1         |
| rs11607732  | 11 | 120548318 | G | A | -0.049 | 0.961  | - | 0     | 0      | 0 | 1         |
| rs118065597 | 11 | 116353269 | A | G | 0.049  | 0.961  | + | 0     | 0      | 0 | 1         |
| rs4256992   | 11 | 120547174 | A | G | -0.049 | 0.961  | - | 0     | 0      | 0 | 1         |
| rs4268524   | 11 | 120547112 | T | C | -0.049 | 0.961  | - | 0     | 0      | 0 | 1         |
| rs4367954   | 11 | 120547109 | G | A | -0.049 | 0.961  | - | 0     | 0      | 0 | 1         |
| rs4628679   | 11 | 120547052 | C | T | -0.049 | 0.961  | - | 0     | 0      | 0 | 1         |
| rs7126415   | 11 | 120566535 | C | G | -0.049 | 0.961  | - | 0     | 0      | 0 | 1         |
| rs11826038  | 11 | 116835398 | G | A | 0.049  | 0.9611 | + | 0     | 0      | 0 | 1         |
| rs4936498   | 11 | 119680923 | G | T | -0.049 | 0.9612 | + | 0     | 0.164  | 1 | 0.6857    |
| rs9326248   | 11 | 116999225 | T | G | -0.049 | 0.9612 | - | 0     | 0      | 0 | 1         |
| rs112151056 | 11 | 116919368 | A | G | 0.048  | 0.9614 | + | 0     | 0      | 0 | 1         |
| rs11216284  | 11 | 117003060 | C | T | -0.048 | 0.9614 | - | 0     | 0      | 0 | 1         |
| rs17120241  | 11 | 116915020 | C | T | 0.048  | 0.9614 | + | 0     | 0      | 0 | 1         |
| rs4938328   | 11 | 116921219 | G | T | -0.048 | 0.9614 | - | 0     | 0      | 0 | 1         |
| rs61905716  | 11 | 116919067 | T | C | 0.048  | 0.9614 | + | 0     | 0      | 0 | 1         |
| rs61905719  | 11 | 116922714 | T | C | 0.048  | 0.9614 | + | 0     | 0      | 0 | 1         |
| rs11216671  | 11 | 117878745 | T | C | -0.048 | 0.9615 | - | 0     | 0      | 0 | 1         |
| rs11216672  | 11 | 117878769 | A | G | -0.048 | 0.9615 | - | 0     | 0      | 0 | 1         |
| rs12799647  | 11 | 120032185 | G | T | 0.048  | 0.9615 | + | 0     | 0      | 0 | 1         |
| rs7934908   | 11 | 120542603 | A | G | 0.048  | 0.9615 | + | 0     | 0      | 0 | 1         |
| rs10892406  | 11 | 119435544 | G | A | -0.048 | 0.9616 | - | 0     | 0      | 0 | 1         |
| rs3135507   | 11 | 116661488 | T | C | 0.048  | 0.9616 | + | -31.9 | 2.274  | 1 | 0.1315    |
| rs10892551  | 11 | 120078286 | A | G | 0.048  | 0.9618 | + | 0     | 0      | 0 | 1         |
| rs10892547  | 11 | 120060793 | T | G | -0.048 | 0.9619 | + | 0     | 0.528  | 1 | 0.4674    |
| rs10790302  | 11 | 119419133 | A | G | 0.047  | 0.9622 | + | 0     | 0      | 0 | 1         |
| rs11217311  | 11 | 119419672 | T | C | 0.047  | 0.9622 | + | 0     | 0      | 0 | 1         |
| rs11217312  | 11 | 119419976 | C | A | 0.047  | 0.9622 | + | 0     | 0      | 0 | 1         |
| rs59837440  | 11 | 116991842 | C | A | -0.047 | 0.9625 | + | 73.8  | 11.438 | 1 | 0.0007195 |
| rs117740883 | 11 | 117259904 | T | C | -0.047 | 0.9626 | - | 0     | 0      | 0 | 1         |
| rs11216896  | 11 | 118430048 | T | C | 0.047  | 0.9628 | + | 0     | 0.009  | 1 | 0.926     |
| rs11607159  | 11 | 120855348 | A | G | -0.047 | 0.9629 | + | 0     | 0.158  | 1 | 0.6908    |
| rs7944957   | 11 | 117996296 | C | T | -0.046 | 0.9629 | + | 0     | 0.055  | 1 | 0.8149    |
| rs10790412  | 11 | 121100193 | C | G | 0.046  | 0.963  | + | 0     | 0.018  | 1 | 0.8921    |
| rs7116375   | 11 | 118069979 | A | C | 0.046  | 0.963  | + | 0     | 0.563  | 1 | 0.4531    |
| rs76674252  | 11 | 116354727 | A | G | 0.046  | 0.9631 | + | 0     | 0      | 0 | 1         |
| rs486876    | 11 | 119773032 | A | G | 0.046  | 0.9634 | + | 0     | 0      | 0 | 1         |
| rs2239896   | 11 | 118983434 | T | C | -0.046 | 0.9636 | - | 0     | 0      | 0 | 1         |
| rs34125463  | 11 | 116537393 | A | T | 0.046  | 0.9637 | + | 0     | 0      | 0 | 1         |
| rs2852228   | 11 | 120602594 | A | T | -0.045 | 0.9639 | - | 0     | 0      | 0 | 1         |

|             |    |           |   |   |        |        |    |        |        |   |           |
|-------------|----|-----------|---|---|--------|--------|----|--------|--------|---|-----------|
| rs7101652   | 11 | 118078718 | A | G | 0.045  | 0.9639 | -+ | 0      | 0.407  | 1 | 0.5233    |
| rs77751615  | 11 | 118982806 | C | A | -0.045 | 0.964  | -? | 0      | 0      | 0 | 1         |
| rs117634345 | 11 | 117065050 | A | G | -0.045 | 0.9641 | -+ | 74     | 11.537 | 1 | 0.0006823 |
| rs606151    | 11 | 119384214 | A | G | -0.045 | 0.9642 | -? | 0      | 0      | 0 | 1         |
| rs10892246  | 11 | 118481431 | A | G | 0.045  | 0.9643 | +- | 0      | 0.003  | 1 | 0.9581    |
| rs565622    | 11 | 116314866 | C | A | 0.045  | 0.9643 | +  | 0      | 0      | 0 | 1         |
| rs7123454   | 11 | 116704178 | C | A | 0.045  | 0.9644 | +  | 0      | 0      | 0 | 1         |
| rs10892358  | 11 | 119255795 | G | A | -0.045 | 0.9645 | -? | 0      | 0      | 0 | 1         |
| rs3133853   | 11 | 120603644 | C | T | 0.045  | 0.9645 | +  | 0      | 0      | 0 | 1         |
| rs608793    | 11 | 118986659 | C | T | 0.045  | 0.9645 | +  | 0      | 0      | 0 | 1         |
| rs7110179   | 11 | 120712591 | G | A | -0.044 | 0.9646 | -? | 0      | 0      | 0 | 1         |
| rs10736499  | 11 | 119429098 | C | T | -0.044 | 0.9648 | -? | 0      | 0      | 0 | 1         |
| rs10750150  | 11 | 119429080 | T | C | -0.044 | 0.9648 | -? | 0      | 0      | 0 | 1         |
| rs36108816  | 11 | 117502518 | C | G | 0.044  | 0.9648 | +  | 0      | 0      | 0 | 1         |
| rs10892065  | 11 | 116897024 | T | C | -0.044 | 0.965  | -? | 0      | 0      | 0 | 1         |
| rs11216286  | 11 | 117004087 | G | A | -0.044 | 0.9652 | -? | 0      | 0      | 0 | 1         |
| rs2298464   | 11 | 117780919 | A | G | -0.044 | 0.9652 | -? | 0      | 0      | 0 | 1         |
| rs4938675   | 11 | 119408686 | A | G | 0.044  | 0.9652 | +  | 0      | 0      | 0 | 1         |
| rs10892600  | 11 | 120545929 | G | A | -0.044 | 0.9653 | -? | 0      | 0      | 0 | 1         |
| rs10892601  | 11 | 120546027 | G | A | -0.044 | 0.9653 | -? | 0      | 0      | 0 | 1         |
| rs10892602  | 11 | 120546082 | A | G | -0.044 | 0.9653 | -? | 0      | 0      | 0 | 1         |
| rs10892603  | 11 | 120546119 | C | T | -0.044 | 0.9653 | -? | 0      | 0      | 0 | 1         |
| rs10892604  | 11 | 120546223 | T | C | -0.044 | 0.9653 | -? | 0      | 0      | 0 | 1         |
| rs11216510  | 11 | 117581589 | C | A | 0.044  | 0.9653 | +  | 0      | 0      | 0 | 1         |
| rs11217957  | 11 | 120543669 | G | A | -0.044 | 0.9653 | -? | 0      | 0      | 0 | 1         |
| rs11217959  | 11 | 120544735 | C | T | -0.044 | 0.9653 | -? | 0      | 0      | 0 | 1         |
| rs11217960  | 11 | 120545103 | T | C | -0.044 | 0.9653 | -? | 0      | 0      | 0 | 1         |
| rs11217961  | 11 | 120545219 | G | A | -0.044 | 0.9653 | -? | 0      | 0      | 0 | 1         |
| rs11217963  | 11 | 120545502 | T | C | -0.044 | 0.9653 | -? | 0      | 0      | 0 | 1         |
| rs11217964  | 11 | 120545503 | G | A | -0.044 | 0.9653 | -? | 0      | 0      | 0 | 1         |
| rs12225737  | 11 | 120546287 | C | A | -0.044 | 0.9653 | -? | 0      | 0      | 0 | 1         |
| rs61902672  | 11 | 120545098 | T | C | -0.044 | 0.9653 | -? | 0      | 0      | 0 | 1         |
| rs10790222  | 11 | 117800574 | A | G | 0.043  | 0.9654 | -+ | -146.4 | 1.217  | 1 | 0.2699    |
| rs72488012  | 11 | 117997427 | A | G | -0.043 | 0.9654 | -? | 0      | 0      | 0 | 1         |
| rs73008568  | 11 | 117065007 | G | C | 0.043  | 0.9654 | +  | 0      | 0      | 0 | 1         |
| rs79220634  | 11 | 117996402 | A | C | -0.043 | 0.9654 | -? | 0      | 0      | 0 | 1         |
| rs10431040  | 11 | 117898465 | A | G | -0.043 | 0.9655 | -? | 0      | 0      | 0 | 1         |
| rs10458984  | 11 | 117897503 | G | T | -0.043 | 0.9655 | -? | 0      | 0      | 0 | 1         |
| rs11217686  | 11 | 119963819 | A | G | 0.043  | 0.9655 | +  | 0      | 0      | 0 | 1         |
| rs474339    | 11 | 117059552 | G | A | -0.043 | 0.9656 | -? | 0      | 0      | 0 | 1         |
| rs10892478  | 11 | 119727706 | G | A | -0.043 | 0.9657 | -? | 0      | 0      | 0 | 1         |
| rs10892597  | 11 | 120542339 | T | C | 0.043  | 0.9657 | +  | 0      | 0      | 0 | 1         |
| rs61907560  | 11 | 116726087 | C | T | -0.043 | 0.9657 | -? | 0      | 0      | 0 | 1         |
| rs74236048  | 11 | 121078691 | T | C | -0.043 | 0.9657 | -? | 0      | 0      | 0 | 1         |
| rs58831762  | 11 | 119428506 | G | T | 0.043  | 0.9658 | +  | 0      | 0      | 0 | 1         |
| rs61901427  | 11 | 120715772 | G | A | -0.043 | 0.9659 | -? | 0      | 0      | 0 | 1         |
| rs7103816   | 11 | 119427346 | C | T | -0.043 | 0.9659 | -? | 0      | 0      | 0 | 1         |
| rs732481    | 11 | 120828855 | G | T | 0.043  | 0.9659 | +  | 0      | 0      | 0 | 1         |
| rs2155857   | 11 | 117974759 | A | G | -0.043 | 0.9661 | -? | 0      | 0      | 0 | 1         |
| rs579200    | 11 | 119700001 | G | T | 0.042  | 0.9663 | +  | 0      | 0      | 0 | 1         |
| rs633621    | 11 | 119866151 | A | G | -0.042 | 0.9663 | -? | 0      | 0      | 0 | 1         |
| rs117812708 | 11 | 116965555 | G | A | -0.042 | 0.9664 | -+ | 74.7   | 11.862 | 1 | 0.0005729 |
| rs482371    | 11 | 116752163 | T | C | 0.042  | 0.9664 | +  | 0      | 0      | 0 | 1         |
| rs77374709  | 11 | 116964942 | T | C | -0.042 | 0.9664 | -+ | 74.7   | 11.862 | 1 | 0.0005729 |
| rs10790390  | 11 | 120542028 | G | A | 0.042  | 0.9665 | +  | 0      | 0      | 0 | 1         |
| rs12796457  | 11 | 120855313 | T | C | -0.042 | 0.9665 | -+ | 0      | 0.156  | 1 | 0.6927    |

|              |    |           |   |   |        |        |    |        |        |   |           |
|--------------|----|-----------|---|---|--------|--------|----|--------|--------|---|-----------|
| rs4938481    | 11 | 117969374 | T | C | 0.042  | 0.9665 | +- | 0      | 0.15   | 1 | 0.6987    |
| rs11218212   | 11 | 121101217 | T | A | -0.042 | 0.9666 | -+ | 0      | 0.035  | 1 | 0.8523    |
| rs113839182  | 11 | 118273602 | T | C | -0.042 | 0.9668 | -+ | -39.7  | 2.147  | 1 | 0.1428    |
| rs548207     | 11 | 116489629 | G | T | -0.042 | 0.9668 | -? | 0      | 0      | 0 | 1         |
| rs10892196   | 11 | 117800083 | T | C | 0.041  | 0.9669 | -+ | -144.3 | 1.228  | 1 | 0.2678    |
| rs7934830    | 11 | 120542761 | G | A | 0.041  | 0.9669 | +  | 0      | 0      | 0 | 1         |
| rs2847699    | 11 | 117929490 | A | G | -0.041 | 0.967  | +- | 0      | 0.59   | 1 | 0.4425    |
| rs631120     | 11 | 117440267 | A | G | -0.041 | 0.967  | -? | 0      | 0      | 0 | 1         |
| rs530702     | 11 | 119983831 | A | G | -0.041 | 0.9671 | -? | 0      | 0      | 0 | 1         |
| rs1352178661 | 11 | 117024256 | A | G | -0.041 | 0.9675 | -+ | 73.5   | 11.316 | 1 | 0.0007686 |
| rs4938710    | 11 | 119566174 | C | T | 0.041  | 0.9675 | +  | 0      | 0      | 0 | 1         |
| rs73010786   | 11 | 117963955 | T | C | 0.041  | 0.9676 | +- | 0      | 0.109  | 1 | 0.7414    |
| rs519672     | 11 | 119984535 | G | C | 0.04   | 0.9677 | +  | 0      | 0      | 0 | 1         |
| rs7110879    | 11 | 116441138 | A | G | 0.04   | 0.9677 | -+ | 0      | 0.279  | 1 | 0.5973    |
| rs78080546   | 11 | 117630622 | T | A | 0.041  | 0.9677 | +- | 26.5   | 4.082  | 1 | 0.04333   |
| rs1626649    | 11 | 118071097 | T | C | 0.04   | 0.9678 | +  | 0      | 0      | 0 | 1         |
| rs10892064   | 11 | 116896553 | G | C | -0.04  | 0.9682 | -? | 0      | 0      | 0 | 1         |
| rs74428560   | 11 | 116989982 | T | C | -0.04  | 0.9683 | -? | 0      | 0      | 0 | 1         |
| rs111587825  | 11 | 118274602 | G | T | -0.039 | 0.9685 | -+ | -39    | 2.158  | 1 | 0.1418    |
| rs1866682    | 11 | 116195089 | T | C | 0.039  | 0.9685 | +  | 0      | 0      | 0 | 1         |
| rs10892182   | 11 | 117699786 | A | G | -0.039 | 0.9688 | -? | 0      | 0      | 0 | 1         |
| rs17123466   | 11 | 119771748 | T | C | 0.039  | 0.9689 | +  | 0      | 0      | 0 | 1         |
| rs55646454   | 11 | 119773103 | T | G | 0.039  | 0.9689 | +  | 0      | 0      | 0 | 1         |
| rs55895660   | 11 | 119774821 | A | G | 0.039  | 0.9689 | +  | 0      | 0      | 0 | 1         |
| rs10790212   | 11 | 117702690 | T | C | 0.039  | 0.969  | +  | 0      | 0      | 0 | 1         |
| rs76813465   | 11 | 117699173 | T | C | 0.039  | 0.969  | +  | 0      | 0      | 0 | 1         |
| rs73018483   | 11 | 117706942 | G | C | 0.039  | 0.9692 | +  | 0      | 0      | 0 | 1         |
| rs76570573   | 11 | 118543798 | T | C | 0.039  | 0.9692 | -+ | 0      | 0.155  | 1 | 0.694     |
| rs8521       | 11 | 117067699 | C | T | -0.039 | 0.9692 | -? | 0      | 0      | 0 | 1         |
| rs61905691   | 11 | 116880703 | G | A | 0.038  | 0.9693 | +  | 0      | 0      | 0 | 1         |
| rs3181258    | 11 | 118218478 | A | T | 0.038  | 0.9694 | -+ | 4.5    | 3.141  | 1 | 0.07636   |
| rs3863306    | 11 | 116853213 | C | T | -0.038 | 0.9694 | -? | 0      | 0      | 0 | 1         |
| rs499443     | 11 | 121081632 | A | G | 0.038  | 0.9694 | -+ | 0      | 0.02   | 1 | 0.8885    |
| rs60915096   | 11 | 116224575 | C | T | 0.038  | 0.9694 | +  | 0      | 0      | 0 | 1         |
| rs7110679    | 11 | 119633863 | A | G | 0.038  | 0.9694 | +  | 0      | 0      | 0 | 1         |
| rs113521822  | 11 | 118063349 | G | A | 0.038  | 0.9696 | +- | 0      | 0.223  | 1 | 0.637     |
| rs654329     | 11 | 121093676 | T | C | 0.038  | 0.9697 | -+ | 0      | 0.02   | 1 | 0.8883    |
| rs77974673   | 11 | 117491787 | T | C | 0.038  | 0.9697 | +  | 0      | 0      | 0 | 1         |
| rs12285095   | 11 | 116658031 | G | T | -0.038 | 0.9699 | +- | -72.4  | 1.74   | 1 | 0.1872    |
| rs139685157  | 11 | 117062158 | A | G | 0.038  | 0.9699 | -+ | 73.3   | 11.217 | 1 | 0.0008105 |
| rs73009131   | 11 | 116336740 | A | G | 0.038  | 0.9699 | +  | 0      | 0      | 0 | 1         |
| rs7128071    | 11 | 116968798 | A | G | 0.038  | 0.97   | +  | 0      | 0      | 0 | 1         |
| rs10892598   | 11 | 120543750 | T | G | -0.037 | 0.9701 | -? | 0      | 0      | 0 | 1         |
| rs543584     | 11 | 119984863 | C | T | 0.037  | 0.9701 | +  | 0      | 0      | 0 | 1         |
| rs11218097   | 11 | 120865697 | T | G | -0.037 | 0.9703 | -? | 0      | 0      | 0 | 1         |
| rs1944522    | 11 | 120864922 | T | C | -0.037 | 0.9703 | -? | 0      | 0      | 0 | 1         |
| rs518181     | 11 | 116772787 | C | A | 0.037  | 0.9703 | +  | 0      | 0      | 0 | 1         |
| rs10790174   | 11 | 117024264 | G | A | 0.037  | 0.9707 | +  | 0      | 0      | 0 | 1         |
| rs1243336    | 11 | 117273051 | T | C | 0.037  | 0.9707 | +  | 0      | 0      | 0 | 1         |
| rs1242127    | 11 | 117076564 | G | A | -0.036 | 0.9709 | -? | 0      | 0      | 0 | 1         |
| rs4938679    | 11 | 119411425 | T | C | 0.036  | 0.971  | +  | 0      | 0      | 0 | 1         |
| rs5014620    | 11 | 117731319 | C | A | -0.036 | 0.9711 | -? | 0      | 0      | 0 | 1         |
| rs5014621    | 11 | 117731284 | A | G | -0.036 | 0.9711 | -? | 0      | 0      | 0 | 1         |
| rs11216564   | 11 | 117695853 | A | G | -0.036 | 0.9715 | -? | 0      | 0      | 0 | 1         |
| rs1320718    | 11 | 120456829 | C | T | 0.036  | 0.9715 | +  | 0      | 0      | 0 | 1         |
| rs2136419    | 11 | 119488176 | T | C | -0.035 | 0.9717 | -? | 0      | 0      | 0 | 1         |

|             |    |           |   |   |        |        |   |       |        |   |           |
|-------------|----|-----------|---|---|--------|--------|---|-------|--------|---|-----------|
| rs681231    | 11 | 121094059 | A | G | 0.035  | 0.9719 | + | 0     | 0.02   | 1 | 0.8871    |
| rs12802652  | 11 | 120037862 | T | G | 0.035  | 0.972  | + | 0     | 0      | 0 | 1         |
| rs7934825   | 11 | 120542709 | G | C | 0.035  | 0.9721 | + | 0     | 0      | 0 | 1         |
| rs140158503 | 11 | 119981694 | T | C | -0.035 | 0.9722 | - | 0     | 0      | 0 | 1         |
| rs4269933   | 11 | 119648368 | G | A | 0.035  | 0.9723 | + | 0     | 0      | 0 | 1         |
| rs4301801   | 11 | 119648306 | G | C | 0.035  | 0.9723 | + | 0     | 0      | 0 | 1         |
| rs4418818   | 11 | 119648005 | A | G | 0.035  | 0.9723 | + | 0     | 0      | 0 | 1         |
| rs77487830  | 11 | 118311869 | G | A | 0.035  | 0.9723 | + | 16.8  | 3.606  | 1 | 0.05758   |
| rs77535829  | 11 | 118311677 | T | C | 0.035  | 0.9723 | + | 16.8  | 3.606  | 1 | 0.05758   |
| rs34699720  | 11 | 119712159 | A | C | -0.034 | 0.9725 | - | 0     | 0      | 0 | 1         |
| rs79697731  | 11 | 117092808 | G | C | -0.034 | 0.9726 | + | 73.4  | 11.291 | 1 | 0.0007788 |
| rs10892393  | 11 | 119426651 | T | C | -0.034 | 0.9727 | - | 0     | 0      | 0 | 1         |
| rs61905060  | 11 | 116561628 | A | G | -0.034 | 0.9727 | - | 0     | 0      | 0 | 1         |
| rs111999954 | 11 | 119832880 | A | G | -0.034 | 0.973  | - | 0     | 0      | 0 | 1         |
| rs12788933  | 11 | 118140184 | T | C | 0.034  | 0.9731 | + | -60.1 | 1.874  | 1 | 0.171     |
| rs540442    | 11 | 117688898 | G | A | -0.034 | 0.9731 | - | 0     | 0      | 0 | 1         |
| rs79524875  | 11 | 118970682 | T | C | 0.034  | 0.9731 | + | 0     | 0      | 0 | 1         |
| rs73022058  | 11 | 118423672 | T | C | 0.033  | 0.9733 | + | 0     | 0.018  | 1 | 0.8942    |
| rs7117314   | 11 | 117698762 | A | G | 0.033  | 0.9734 | + | 0     | 0      | 0 | 1         |
| rs117935983 | 11 | 116529188 | G | T | -0.033 | 0.9735 | - | 0     | 0      | 0 | 1         |
| rs4272790   | 11 | 120445354 | T | C | 0.033  | 0.9735 | + | 0     | 0      | 0 | 1         |
| rs75764292  | 11 | 120575606 | T | A | 0.033  | 0.9736 | + | 0     | 0      | 0 | 1         |
| rs77445023  | 11 | 119390332 | T | G | -0.033 | 0.9736 | - | 0     | 0      | 0 | 1         |
| rs111707199 | 11 | 118276810 | G | A | 0.033  | 0.974  | + | -18   | 2.543  | 1 | 0.1108    |
| rs116943892 | 11 | 116978627 | G | A | 0.033  | 0.9741 | + | 73.5  | 11.335 | 1 | 0.0007607 |
| rs35652094  | 11 | 120039696 | A | G | 0.032  | 0.9741 | + | 0     | 0      | 0 | 1         |
| rs61907562  | 11 | 116727592 | A | G | -0.032 | 0.9741 | - | 0     | 0      | 0 | 1         |
| rs1941633   | 11 | 117966677 | A | G | 0.032  | 0.9744 | + | 0     | 0.103  | 1 | 0.7478    |
| rs2276125   | 11 | 117965646 | A | G | 0.032  | 0.9744 | + | 0     | 0.109  | 1 | 0.741     |
| rs505142    | 11 | 120098746 | A | T | -0.032 | 0.9745 | - | 0     | 0      | 0 | 1         |
| rs10790216  | 11 | 117731927 | C | T | -0.032 | 0.9746 | - | 0     | 0      | 0 | 1         |
| rs12796298  | 11 | 120855341 | G | A | -0.032 | 0.9747 | + | 0     | 0.152  | 1 | 0.697     |
| rs11217958  | 11 | 120544575 | T | C | 0.032  | 0.9748 | + | 0     | 0      | 0 | 1         |
| rs10892063  | 11 | 116896155 | A | C | -0.031 | 0.9749 | - | 0     | 0      | 0 | 1         |
| rs76870367  | 11 | 119243191 | T | C | 0.031  | 0.975  | + | 0     | 0      | 0 | 1         |
| rs74674700  | 11 | 119839599 | T | C | 0.031  | 0.9753 | + | 0     | 0      | 0 | 1         |
| rs4408323   | 11 | 119648458 | C | A | 0.031  | 0.9754 | + | 0     | 0      | 0 | 1         |
| rs7110823   | 11 | 116441277 | G | C | 0.031  | 0.9754 | + | 0     | 0.298  | 1 | 0.5853    |
| rs73005236  | 11 | 116319634 | A | G | 0.031  | 0.9754 | + | 0     | 0      | 0 | 1         |
| rs9787799   | 11 | 121100429 | G | A | 0.031  | 0.9754 | + | 0     | 0.021  | 1 | 0.8851    |
| rs9787800   | 11 | 121100648 | G | A | 0.031  | 0.9754 | + | 0     | 0.021  | 1 | 0.8851    |
| rs484646    | 11 | 116732856 | A | G | 0.031  | 0.9755 | + | 0     | 0      | 0 | 1         |
| rs7109251   | 11 | 119616190 | A | G | 0.031  | 0.9755 | + | 0     | 0      | 0 | 1         |
| rs10892053  | 11 | 116857003 | C | T | -0.031 | 0.9756 | - | 0     | 0      | 0 | 1         |
| rs11216673  | 11 | 117879926 | G | A | -0.031 | 0.9756 | - | 0     | 0      | 0 | 1         |
| rs7125115   | 11 | 118478330 | A | G | 0.031  | 0.9756 | + | 0     | 0.089  | 1 | 0.7657    |
| rs76900966  | 11 | 119678909 | T | G | -0.03  | 0.9757 | - | 0     | 0      | 0 | 1         |
| rs543876    | 11 | 119750487 | C | T | -0.03  | 0.9758 | - | 0     | 0      | 0 | 1         |
| rs78301905  | 11 | 117076336 | C | T | -0.03  | 0.976  | + | 73.4  | 11.275 | 1 | 0.0007856 |
| rs79278568  | 11 | 117084410 | A | G | -0.03  | 0.976  | + | 73.4  | 11.275 | 1 | 0.0007856 |
| rs79997323  | 11 | 117083948 | G | A | -0.03  | 0.976  | + | 73.4  | 11.275 | 1 | 0.0007856 |
| rs652916    | 11 | 121094021 | T | C | 0.03   | 0.9761 | + | 0     | 0.021  | 1 | 0.8847    |
| rs10790177  | 11 | 117048417 | A | G | -0.03  | 0.9762 | - | 0     | 0      | 0 | 1         |
| rs651825    | 11 | 118042713 | G | T | -0.03  | 0.9763 | + | 0     | 0.394  | 1 | 0.5304    |
| rs10750156  | 11 | 119436709 | G | A | 0.03   | 0.9764 | + | 0     | 0      | 0 | 1         |
| rs10892408  | 11 | 119436816 | G | A | 0.03   | 0.9764 | + | 0     | 0      | 0 | 1         |

|             |    |           |   |   |        |        |    |        |       |   |         |
|-------------|----|-----------|---|---|--------|--------|----|--------|-------|---|---------|
| rs7112584   | 11 | 118069240 | A | G | 0.03   | 0.9764 | -+ | 0      | 0.457 | 1 | 0.4989  |
| rs11216071  | 11 | 116515405 | C | G | -0.029 | 0.9766 | -? | 0      | 0     | 0 | 1       |
| rs3225      | 11 | 120100520 | C | G | -0.029 | 0.9766 | -? | 0      | 0     | 0 | 1       |
| rs10892392  | 11 | 119426508 | T | C | -0.029 | 0.9767 | -? | 0      | 0     | 0 | 1       |
| rs78913295  | 11 | 119847854 | T | C | -0.029 | 0.9767 | -? | 0      | 0     | 0 | 1       |
| rs590021    | 11 | 121092625 | T | C | 0.029  | 0.9768 | -+ | 0      | 0.021 | 1 | 0.8843  |
| rs10892155  | 11 | 117537378 | T | C | -0.029 | 0.9769 | -? | 0      | 0     | 0 | 1       |
| rs11606857  | 11 | 119615828 | T | A | 0.029  | 0.9769 | +? | 0      | 0     | 0 | 1       |
| rs117734523 | 11 | 119786488 | A | G | -0.029 | 0.9769 | -? | 0      | 0     | 0 | 1       |
| rs2735182   | 11 | 117012210 | A | T | 0.029  | 0.9769 | +? | 0      | 0     | 0 | 1       |
| rs3736120   | 11 | 117032125 | G | T | -0.029 | 0.977  | -? | 0      | 0     | 0 | 1       |
| rs117649997 | 11 | 119863317 | A | G | -0.029 | 0.9771 | -? | 0      | 0     | 0 | 1       |
| rs11217290  | 11 | 119320879 | A | G | 0.028  | 0.9773 | +? | 0      | 0     | 0 | 1       |
| rs12795599  | 11 | 120036812 | A | G | 0.028  | 0.9777 | +? | 0      | 0     | 0 | 1       |
| rs10892623  | 11 | 120636628 | G | A | 0.028  | 0.9779 | +? | 0      | 0     | 0 | 1       |
| rs34980489  | 11 | 119384277 | A | T | 0.028  | 0.978  | +? | 0      | 0     | 0 | 1       |
| rs55776558  | 11 | 116527521 | C | T | 0.027  | 0.9784 | +? | 0      | 0     | 0 | 1       |
| rs12279180  | 11 | 116604032 | C | T | -0.027 | 0.9786 | +- | -75    | 1.715 | 1 | 0.1904  |
| rs79136761  | 11 | 117311507 | A | G | -0.026 | 0.9789 | -? | 0      | 0     | 0 | 1       |
| rs11216400  | 11 | 117323834 | G | A | -0.026 | 0.979  | -? | 0      | 0     | 0 | 1       |
| rs11217357  | 11 | 119497757 | T | G | -0.026 | 0.979  | -? | 0      | 0     | 0 | 1       |
| rs11217358  | 11 | 119497806 | A | G | -0.026 | 0.979  | -? | 0      | 0     | 0 | 1       |
| rs601503    | 11 | 117581240 | C | G | 0.026  | 0.9791 | +? | 0      | 0     | 0 | 1       |
| rs641569    | 11 | 117581228 | T | G | 0.026  | 0.9791 | +? | 0      | 0     | 0 | 1       |
| rs693992    | 11 | 117581785 | A | C | 0.026  | 0.9791 | +? | 0      | 0     | 0 | 1       |
| rs112468256 | 11 | 118278479 | C | T | 0.026  | 0.9792 | -+ | -19.6  | 2.508 | 1 | 0.1133  |
| rs7928668   | 11 | 117799923 | T | C | 0.026  | 0.9792 | -+ | -140.4 | 1.248 | 1 | 0.264   |
| rs112970787 | 11 | 118212235 | C | G | -0.026 | 0.9793 | -+ | 8.1    | 3.266 | 1 | 0.07074 |
| rs17123461  | 11 | 119771532 | A | C | 0.026  | 0.9794 | +? | 0      | 0     | 0 | 1       |
| rs10790308  | 11 | 119425342 | A | G | 0.026  | 0.9795 | +? | 0      | 0     | 0 | 1       |
| rs10790309  | 11 | 119426055 | A | G | 0.026  | 0.9795 | +? | 0      | 0     | 0 | 1       |
| rs10892052  | 11 | 116834313 | G | A | 0.026  | 0.9795 | +? | 0      | 0     | 0 | 1       |
| rs10892391  | 11 | 119426104 | G | T | 0.026  | 0.9795 | +? | 0      | 0     | 0 | 1       |
| rs11216394  | 11 | 117315692 | G | A | 0.026  | 0.9795 | +? | 0      | 0     | 0 | 1       |
| rs1793137   | 11 | 118016068 | C | T | 0.026  | 0.9795 | ++ | 0      | 0     | 1 | 0.9956  |
| rs61506726  | 11 | 118831335 | G | A | -0.026 | 0.9795 | +- | 0      | 0.84  | 1 | 0.3595  |
| rs10892113  | 11 | 117324522 | T | C | -0.025 | 0.9797 | -? | 0      | 0     | 0 | 1       |
| rs17092732  | 11 | 117997374 | A | G | 0.025  | 0.9797 | +? | 0      | 0     | 0 | 1       |
| rs4277146   | 11 | 117010979 | G | A | 0.025  | 0.9797 | +? | 0      | 0     | 0 | 1       |
| rs59209096  | 11 | 119427370 | A | G | 0.025  | 0.9801 | +? | 0      | 0     | 0 | 1       |
| rs10892459  | 11 | 119653883 | G | C | 0.025  | 0.9803 | +? | 0      | 0     | 0 | 1       |
| rs1466052   | 11 | 119653781 | C | T | 0.025  | 0.9803 | +? | 0      | 0     | 0 | 1       |
| rs949296    | 11 | 120649396 | A | T | -0.025 | 0.9804 | -? | 0      | 0     | 0 | 1       |
| rs11216562  | 11 | 117686732 | T | C | 0.024  | 0.9807 | +? | 0      | 0     | 0 | 1       |
| rs17122170  | 11 | 118296668 | C | G | -0.024 | 0.9807 | +- | 0      | 0.285 | 1 | 0.5931  |
| rs6589791   | 11 | 119951213 | A | C | -0.024 | 0.9808 | -? | 0      | 0     | 0 | 1       |
| rs6589781   | 11 | 119727452 | T | A | -0.024 | 0.9809 | -? | 0      | 0     | 0 | 1       |
| rs4936359   | 11 | 116893724 | A | T | 0.024  | 0.981  | +? | 0      | 0     | 0 | 1       |
| rs4936360   | 11 | 116893769 | C | G | 0.024  | 0.981  | +? | 0      | 0     | 0 | 1       |
| rs4938325   | 11 | 116898479 | A | G | 0.024  | 0.981  | +? | 0      | 0     | 0 | 1       |
| rs61905709  | 11 | 116897834 | T | C | 0.024  | 0.981  | +? | 0      | 0     | 0 | 1       |
| rs7112191   | 11 | 116902056 | A | G | 0.024  | 0.981  | +? | 0      | 0     | 0 | 1       |
| rs7125788   | 11 | 116883396 | C | T | 0.024  | 0.981  | +? | 0      | 0     | 0 | 1       |
| rs171052    | 11 | 117081763 | G | C | 0.024  | 0.9811 | +? | 0      | 0     | 0 | 1       |
| rs191030218 | 11 | 117454782 | C | T | 0.024  | 0.9811 | +? | 0      | 0     | 0 | 1       |
| rs3863316   | 11 | 117802743 | G | C | 0.024  | 0.9812 | -+ | 21.2   | 3.807 | 1 | 0.05103 |

|             |    |           |   |   |        |        |    |       |        |   |           |
|-------------|----|-----------|---|---|--------|--------|----|-------|--------|---|-----------|
| rs17124590  | 11 | 120828210 | T | A | 0.023  | 0.9813 | +? | 0     | 0      | 0 | 1         |
| rs55751037  | 11 | 116456659 | T | C | -0.023 | 0.9814 | +? | 0     | 0.608  | 1 | 0.4356    |
| rs3132784   | 11 | 120588584 | C | G | -0.023 | 0.9815 | -? | 0     | 0      | 0 | 1         |
| rs111849979 | 11 | 117547323 | G | A | 0.023  | 0.9816 | +? | 0     | 0      | 0 | 1         |
| rs4582984   | 11 | 119499014 | C | A | 0.023  | 0.9817 | +? | 0     | 0      | 0 | 1         |
| rs664590    | 11 | 119964351 | T | G | 0.023  | 0.9817 | +? | 0     | 0      | 0 | 1         |
| rs11216813  | 11 | 118071836 | A | G | 0.023  | 0.9818 | -+ | 0     | 0.344  | 1 | 0.5575    |
| rs6589582   | 11 | 116829200 | A | C | -0.023 | 0.9818 | -? | 0     | 0      | 0 | 1         |
| rs9787912   | 11 | 121100910 | A | G | 0.023  | 0.9818 | -+ | 0     | 0.022  | 1 | 0.8815    |
| rs489436    | 11 | 121090812 | A | C | 0.023  | 0.9819 | -+ | 0     | 0.022  | 1 | 0.8814    |
| rs543954    | 11 | 121090892 | A | G | 0.023  | 0.9819 | -+ | 0     | 0.022  | 1 | 0.8814    |
| rs588550    | 11 | 121091188 | A | G | 0.023  | 0.9819 | -+ | 0     | 0.022  | 1 | 0.8814    |
| rs618739    | 11 | 121090822 | A | G | 0.023  | 0.9819 | -+ | 0     | 0.022  | 1 | 0.8814    |
| rs10892215  | 11 | 117978103 | T | C | -0.023 | 0.982  | -? | 0     | 0      | 0 | 1         |
| rs11216765  | 11 | 117978247 | T | C | -0.023 | 0.982  | -? | 0     | 0      | 0 | 1         |
| rs4519102   | 11 | 119493539 | C | A | 0.023  | 0.982  | +? | 0     | 0      | 0 | 1         |
| rs4590884   | 11 | 120632138 | T | C | -0.023 | 0.982  | -? | 0     | 0      | 0 | 1         |
| rs10892533  | 11 | 119959410 | T | C | 0.022  | 0.9822 | +? | 0     | 0      | 0 | 1         |
| rs141512500 | 11 | 117674061 | G | A | 0.022  | 0.9822 | +? | 0     | 0      | 0 | 1         |
| rs79777938  | 11 | 116980147 | C | G | 0.022  | 0.9824 | -+ | 73.6  | 11.375 | 1 | 0.0007444 |
| rs10892317  | 11 | 118832035 | C | T | 0.022  | 0.9825 | +? | 0     | 0.885  | 1 | 0.347     |
| rs10790323  | 11 | 119498128 | A | G | -0.022 | 0.9827 | -? | 0     | 0      | 0 | 1         |
| rs117140575 | 11 | 116993291 | C | T | 0.022  | 0.9827 | -+ | 73.6  | 11.377 | 1 | 0.0007438 |
| rs12276427  | 11 | 119951111 | A | G | -0.022 | 0.9827 | -? | 0     | 0      | 0 | 1         |
| rs12417625  | 11 | 120072443 | G | A | -0.022 | 0.9827 | -? | 0     | 0      | 0 | 1         |
| rs60215110  | 11 | 116987767 | A | G | 0.022  | 0.9827 | -+ | 73.6  | 11.377 | 1 | 0.0007438 |
| rs79117087  | 11 | 116992739 | C | A | 0.022  | 0.9827 | -+ | 73.6  | 11.377 | 1 | 0.0007438 |
| rs7928437   | 11 | 119664304 | G | T | 0.022  | 0.9827 | +? | 0     | 0      | 0 | 1         |
| rs640621    | 11 | 116726769 | C | G | -0.022 | 0.9828 | -? | 0     | 0      | 0 | 1         |
| rs11216161  | 11 | 116721201 | T | C | 0.021  | 0.983  | +? | 0     | 0      | 0 | 1         |
| rs45618531  | 11 | 118087765 | T | C | 0.021  | 0.983  | -+ | -39.5 | 2.15   | 1 | 0.1426    |
| rs73005230  | 11 | 116316628 | A | G | 0.021  | 0.9831 | +? | 0     | 0      | 0 | 1         |
| rs10892509  | 11 | 119864323 | C | A | -0.021 | 0.9834 | -? | 0     | 0      | 0 | 1         |
| rs1815774   | 11 | 117731439 | C | G | -0.021 | 0.9834 | -? | 0     | 0      | 0 | 1         |
| rs57151589  | 11 | 120769382 | T | A | -0.021 | 0.9834 | -? | 0     | 0      | 0 | 1         |
| rs7396061   | 11 | 116750874 | A | C | -0.021 | 0.9835 | -? | 0     | 0      | 0 | 1         |
| rs10892461  | 11 | 119654807 | C | T | -0.021 | 0.9836 | -? | 0     | 0      | 0 | 1         |
| rs7945704   | 11 | 117235368 | A | G | -0.021 | 0.9836 | -? | 0     | 0      | 0 | 1         |
| rs527833    | 11 | 119704194 | A | G | -0.02  | 0.9837 | -? | 0     | 0      | 0 | 1         |
| rs650162    | 11 | 117574397 | T | C | 0.02   | 0.9839 | +? | 0     | 0      | 0 | 1         |
| rs140727315 | 11 | 117055893 | C | G | -0.02  | 0.984  | -+ | 73.3  | 11.236 | 1 | 0.0008021 |
| rs184936191 | 11 | 117061994 | T | A | -0.02  | 0.984  | -+ | 73.3  | 11.236 | 1 | 0.0008021 |
| rs189196849 | 11 | 117052757 | T | G | -0.02  | 0.984  | -+ | 73.3  | 11.236 | 1 | 0.0008021 |
| rs477759    | 11 | 119696165 | T | C | -0.02  | 0.984  | -+ | 0     | 0.123  | 1 | 0.7261    |
| rs59978576  | 11 | 117054029 | G | C | -0.02  | 0.984  | -+ | 73.3  | 11.236 | 1 | 0.0008021 |
| rs61268522  | 11 | 117055400 | C | A | -0.02  | 0.984  | -+ | 73.3  | 11.236 | 1 | 0.0008021 |
| rs7109733   | 11 | 119958632 | C | T | -0.02  | 0.984  | -? | 0     | 0      | 0 | 1         |
| rs74967901  | 11 | 117072970 | A | G | -0.02  | 0.984  | -+ | 73.3  | 11.236 | 1 | 0.0008021 |
| rs75525407  | 11 | 117041911 | T | C | -0.02  | 0.984  | -+ | 73.3  | 11.236 | 1 | 0.0008021 |
| rs79043792  | 11 | 117065271 | C | G | -0.02  | 0.984  | -+ | 73.3  | 11.236 | 1 | 0.0008021 |
| rs10790393  | 11 | 120548054 | T | C | 0.02   | 0.9842 | +? | 0     | 0      | 0 | 1         |
| rs11218211  | 11 | 121098347 | C | T | -0.02  | 0.9843 | -+ | 0     | 0.03   | 1 | 0.8623    |
| rs664971    | 11 | 117070857 | G | A | 0.02   | 0.9843 | +? | 0     | 0      | 0 | 1         |
| rs11218101  | 11 | 120867855 | A | G | -0.02  | 0.9844 | -? | 0     | 0      | 0 | 1         |
| rs7121898   | 11 | 116796846 | A | T | -0.019 | 0.9846 | -? | 0     | 0      | 0 | 1         |
| rs1295019   | 11 | 120098044 | A | C | -0.019 | 0.9847 | -? | 0     | 0      | 0 | 1         |

|             |    |           |   |   |        |        |   |        |        |   |           |
|-------------|----|-----------|---|---|--------|--------|---|--------|--------|---|-----------|
| rs1789792   | 11 | 119696100 | G | T | 0.019  | 0.9847 | + | 0      | 0      | 0 | 1         |
| rs2282493   | 11 | 117873229 | T | C | -0.019 | 0.9847 | - | 0      | 0      | 0 | 1         |
| rs61903426  | 11 | 116968268 | T | C | 0.019  | 0.9847 | + | 0      | 0      | 0 | 1         |
| rs12363785  | 11 | 119965450 | A | G | -0.019 | 0.9848 | - | 0      | 0      | 0 | 1         |
| rs947969    | 11 | 117779612 | A | G | -0.019 | 0.9848 | - | 0      | 0      | 0 | 1         |
| rs6589792   | 11 | 119951214 | G | C | -0.019 | 0.985  | - | 0      | 0      | 0 | 1         |
| rs7103360   | 11 | 119650105 | G | A | 0.019  | 0.985  | + | 0      | 0      | 0 | 1         |
| rs73005128  | 11 | 121151034 | T | C | 0.019  | 0.9852 | + | 0      | 0      | 0 | 1         |
| rs1815771   | 11 | 120656479 | A | G | 0.018  | 0.9853 | + | 0      | 0      | 0 | 1         |
| rs2008908   | 11 | 117019010 | C | T | 0.018  | 0.9853 | + | 0      | 0      | 0 | 1         |
| rs12787356  | 11 | 116477692 | A | G | 0.018  | 0.9854 | + | 0      | 0      | 0 | 1         |
| rs504976    | 11 | 120000233 | C | A | 0.018  | 0.9854 | + | 0      | 0      | 0 | 1         |
| rs80326995  | 11 | 120643050 | A | G | 0.018  | 0.9854 | + | 0      | 0      | 0 | 1         |
| rs118000863 | 11 | 119935980 | A | G | -0.018 | 0.9855 | - | 0      | 0      | 0 | 1         |
| rs524792    | 11 | 120830413 | C | T | -0.018 | 0.9856 | - | 0      | 0      | 0 | 1         |
| rs11600755  | 11 | 120639087 | T | C | -0.018 | 0.9857 | - | 0      | 0      | 0 | 1         |
| rs4310631   | 11 | 120440360 | G | C | 0.018  | 0.9858 | + | 0      | 0      | 0 | 1         |
| rs61905712  | 11 | 116909293 | A | G | 0.018  | 0.9858 | + | 0      | 0      | 0 | 1         |
| rs61905713  | 11 | 116909429 | T | C | 0.018  | 0.9858 | + | 0      | 0      | 0 | 1         |
| rs10892151  | 11 | 117531731 | T | C | 0.018  | 0.9859 | + | -174.1 | 1.094  | 1 | 0.2955    |
| rs12289120  | 11 | 118066609 | T | C | 0.018  | 0.986  | + | 0      | 0.02   | 1 | 0.8869    |
| rs12574454  | 11 | 120767546 | G | A | -0.017 | 0.9861 | - | 0      | 0      | 0 | 1         |
| rs73008656  | 11 | 119717705 | G | T | -0.017 | 0.9862 | - | 0      | 0      | 0 | 1         |
| rs11600544  | 11 | 118076954 | C | G | 0.017  | 0.9866 | + | 0      | 0      | 0 | 1         |
| rs1805      | 11 | 118076069 | T | G | 0.017  | 0.9866 | + | 0      | 0      | 0 | 1         |
| rs17121871  | 11 | 118073344 | T | C | 0.017  | 0.9867 | + | 0      | 0      | 0 | 1         |
| rs3915646   | 11 | 119956652 | C | T | -0.017 | 0.9868 | - | 0      | 0      | 0 | 1         |
| rs634416    | 11 | 117579815 | T | C | 0.016  | 0.9869 | + | 0      | 0      | 0 | 1         |
| rs670972    | 11 | 117579270 | A | G | 0.016  | 0.9869 | + | 0      | 0      | 0 | 1         |
| rs879602    | 11 | 120656572 | C | T | 0.016  | 0.987  | + | 0      | 0      | 0 | 1         |
| rs6589627   | 11 | 117730979 | C | T | 0.016  | 0.9873 | + | 0      | 0      | 0 | 1         |
| rs6589628   | 11 | 117730983 | A | G | 0.016  | 0.9873 | + | 0      | 0      | 0 | 1         |
| rs6589629   | 11 | 117731070 | C | G | 0.016  | 0.9873 | + | 0      | 0      | 0 | 1         |
| rs6589630   | 11 | 117731085 | C | T | 0.016  | 0.9873 | + | 0      | 0      | 0 | 1         |
| rs7106442   | 11 | 120770004 | T | C | -0.016 | 0.9874 | - | 0      | 0      | 0 | 1         |
| rs61905705  | 11 | 116883776 | T | A | 0.016  | 0.9875 | + | 0      | 0      | 0 | 1         |
| rs61905706  | 11 | 116883777 | T | G | 0.016  | 0.9875 | + | 0      | 0      | 0 | 1         |
| rs10892407  | 11 | 119436098 | A | C | 0.016  | 0.9876 | + | 0      | 0      | 0 | 1         |
| rs9645662   | 11 | 117974832 | A | G | 0.016  | 0.9876 | + | 0      | 0      | 0 | 1         |
| rs10892599  | 11 | 120545811 | T | G | 0.015  | 0.9877 | + | 0      | 0      | 0 | 1         |
| rs142742415 | 11 | 117000117 | A | G | 0.015  | 0.9877 | + | 73.5   | 11.303 | 1 | 0.0007738 |
| rs77983828  | 11 | 117001875 | C | T | 0.015  | 0.9877 | + | 73.5   | 11.303 | 1 | 0.0007738 |
| rs10892386  | 11 | 119413090 | T | C | -0.015 | 0.9878 | - | 0      | 0      | 0 | 1         |
| rs542580    | 11 | 120827067 | T | C | 0.015  | 0.9878 | + | 0      | 0      | 0 | 1         |
| rs11215903  | 11 | 116237754 | G | T | 0.015  | 0.988  | + | 0      | 0      | 0 | 1         |
| rs57081718  | 11 | 120144941 | A | G | -0.015 | 0.9881 | - | 0      | 0      | 0 | 1         |
| rs73014416  | 11 | 117535760 | A | G | -0.015 | 0.9882 | - | 0      | 0      | 0 | 1         |
| rs533556    | 11 | 116741572 | A | C | -0.015 | 0.9884 | - | 0      | 0      | 0 | 1         |
| rs10892538  | 11 | 119977712 | A | G | 0.014  | 0.9885 | + | 0      | 0      | 0 | 1         |
| rs1269329   | 11 | 116755041 | T | C | 0.014  | 0.9885 | + | 0      | 0      | 0 | 1         |
| rs73020452  | 11 | 117759895 | C | T | 0.014  | 0.9886 | + | 0      | 0      | 0 | 1         |
| rs35968460  | 11 | 119727199 | T | C | 0.014  | 0.9888 | + | 0      | 0      | 0 | 1         |
| rs609663    | 11 | 117201749 | G | C | -0.014 | 0.9888 | - | 0      | 0      | 0 | 1         |
| rs11820008  | 11 | 120869570 | T | C | 0.014  | 0.9889 | + | 0      | 0      | 0 | 1         |
| rs10502222  | 11 | 116833730 | C | T | 0.014  | 0.989  | + | 0      | 0      | 0 | 1         |
| rs12363187  | 11 | 120544070 | T | C | -0.014 | 0.989  | - | 0      | 0      | 0 | 1         |

|             |    |           |   |   |        |        |    |       |        |   |           |
|-------------|----|-----------|---|---|--------|--------|----|-------|--------|---|-----------|
| rs2306474   | 11 | 117099025 | G | A | -0.014 | 0.989  | +  | 73.2  | 11.212 | 1 | 0.0008126 |
| rs678957    | 11 | 118050855 | T | C | -0.014 | 0.989  | +  | 0     | 0.437  | 1 | 0.5086    |
| rs61898747  | 11 | 119445010 | G | T | -0.014 | 0.9891 | -? | 0     | 0      | 0 | 1         |
| rs34178922  | 11 | 120970408 | A | G | -0.014 | 0.9892 | -? | 0     | 0      | 0 | 1         |
| rs7927088   | 11 | 117401470 | G | A | -0.014 | 0.9892 | -? | 0     | 0      | 0 | 1         |
| rs10892460  | 11 | 119654058 | C | T | 0.013  | 0.9894 | +  | 0     | 0      | 0 | 1         |
| rs236910    | 11 | 117081974 | G | A | -0.013 | 0.9896 | -? | 0     | 0      | 0 | 1         |
| rs10892079  | 11 | 117016824 | T | G | 0.013  | 0.9898 | +  | 0     | 0      | 0 | 1         |
| rs7939548   | 11 | 118212979 | A | G | -0.013 | 0.9898 | +  | 8.2   | 3.267  | 1 | 0.0707    |
| rs11218126  | 11 | 120921866 | T | C | 0.013  | 0.9899 | +  | 0     | 0      | 0 | 1         |
| rs4391855   | 11 | 116350751 | A | G | 0.013  | 0.9899 | +  | 0     | 0      | 0 | 1         |
| rs73018334  | 11 | 117313948 | A | C | 0.013  | 0.9899 | +  | 0     | 0      | 0 | 1         |
| rs11216819  | 11 | 118084980 | G | A | -0.013 | 0.99   | -? | 0     | 0      | 0 | 1         |
| rs477337    | 11 | 120000885 | T | C | -0.012 | 0.9904 | -? | 0     | 0      | 0 | 1         |
| rs477361    | 11 | 120000873 | T | G | -0.012 | 0.9904 | -? | 0     | 0      | 0 | 1         |
| rs4936571   | 11 | 120872094 | G | A | -0.012 | 0.9904 | -? | 0     | 0      | 0 | 1         |
| rs61898283  | 11 | 120091015 | G | A | -0.012 | 0.9906 | -? | 0     | 0      | 0 | 1         |
| rs61898284  | 11 | 120091077 | A | G | -0.012 | 0.9906 | -? | 0     | 0      | 0 | 1         |
| rs61898287  | 11 | 120092774 | T | A | -0.012 | 0.9906 | -? | 0     | 0      | 0 | 1         |
| rs61903779  | 11 | 117700201 | G | A | -0.012 | 0.9906 | -? | 0     | 0      | 0 | 1         |
| rs4936477   | 11 | 119411610 | G | A | -0.012 | 0.9907 | -? | 0     | 0      | 0 | 1         |
| rs948107    | 11 | 117731643 | A | C | -0.012 | 0.9907 | -? | 0     | 0      | 0 | 1         |
| rs112583389 | 11 | 118278998 | G | T | 0.012  | 0.9908 | +  | -20.2 | 2.495  | 1 | 0.1142    |
| rs575549    | 11 | 116315743 | A | G | -0.012 | 0.9908 | -? | 0     | 0      | 0 | 1         |
| rs1787027   | 11 | 119967661 | C | A | -0.011 | 0.9909 | -? | 0     | 0      | 0 | 1         |
| rs10502229  | 11 | 117979970 | T | G | -0.011 | 0.9911 | -? | 0     | 0      | 0 | 1         |
| rs7925677   | 11 | 119720281 | A | G | 0.011  | 0.9911 | +  | 0     | 0      | 0 | 1         |
| rs964104    | 11 | 119753972 | A | G | 0.011  | 0.9911 | +  | 0     | 0      | 0 | 1         |
| rs868066    | 11 | 116408318 | A | G | -0.011 | 0.9912 | -? | 0     | 0      | 0 | 1         |
| rs660443    | 11 | 116760693 | T | C | -0.011 | 0.9913 | -? | 0     | 0      | 0 | 1         |
| rs117303996 | 11 | 117061937 | A | G | -0.011 | 0.9916 | +  | 73.2  | 11.2   | 1 | 0.0008181 |
| rs150881386 | 11 | 117034320 | T | C | -0.011 | 0.9916 | +  | 73.2  | 11.2   | 1 | 0.0008181 |
| rs1944505   | 11 | 119838883 | A | G | -0.011 | 0.9916 | -? | 0     | 0      | 0 | 1         |
| rs2508560   | 11 | 117575629 | A | G | 0.01   | 0.9917 | +  | 0     | 0      | 0 | 1         |
| rs585718    | 11 | 117575841 | T | C | 0.01   | 0.9917 | +  | 0     | 0      | 0 | 1         |
| rs10047459  | 11 | 116721826 | C | T | -0.01  | 0.9918 | -? | 0     | 0      | 0 | 1         |
| rs11216818  | 11 | 118080268 | T | C | 0.01   | 0.9918 | +  | 0     | 0.333  | 1 | 0.5639    |
| rs4306318   | 11 | 118080520 | T | C | 0.01   | 0.9918 | +  | 0     | 0.333  | 1 | 0.5639    |
| rs35662046  | 11 | 119654326 | C | T | 0.01   | 0.9922 | +  | 0     | 0      | 0 | 1         |
| rs605374    | 11 | 120005633 | T | G | 0.01   | 0.9922 | +  | 0     | 0      | 0 | 1         |
| rs6589590   | 11 | 116936081 | A | C | -0.01  | 0.9922 | -? | 0     | 0      | 0 | 1         |
| rs664082    | 11 | 117071070 | C | G | 0.01   | 0.9922 | +  | 0     | 0      | 0 | 1         |
| rs2444242   | 11 | 120082486 | A | G | -0.01  | 0.9923 | -? | 0     | 0      | 0 | 1         |
| rs73009990  | 11 | 117882065 | A | G | 0.01   | 0.9923 | +  | 0     | 0      | 0 | 1         |
| rs7935087   | 11 | 120542998 | G | A | -0.009 | 0.9925 | -? | 0     | 0      | 0 | 1         |
| rs10892550  | 11 | 120078028 | T | G | 0.009  | 0.9926 | +  | 0     | 0      | 0 | 1         |
| rs2155194   | 11 | 117781435 | A | G | 0.009  | 0.9926 | +  | 0     | 0      | 0 | 1         |
| rs11216615  | 11 | 117777953 | G | A | -0.009 | 0.9927 | -? | 0     | 0      | 0 | 1         |
| rs17121879  | 11 | 118080133 | G | T | 0.009  | 0.9928 | +  | 0     | 0      | 0 | 1         |
| rs17121881  | 11 | 118081345 | A | T | 0.009  | 0.9928 | +  | 0     | 0      | 0 | 1         |
| rs17121882  | 11 | 118081468 | C | T | 0.009  | 0.9928 | +  | 0     | 0      | 0 | 1         |
| rs4938489   | 11 | 118079867 | G | T | 0.009  | 0.9928 | +  | 0     | 0      | 0 | 1         |
| rs4938490   | 11 | 118080977 | G | A | 0.009  | 0.9928 | +  | 0     | 0      | 0 | 1         |
| rs7945998   | 11 | 119414914 | T | C | 0.009  | 0.9928 | +  | 0     | 0      | 0 | 1         |
| rs11606569  | 11 | 119654208 | C | T | 0.009  | 0.993  | +  | 0     | 0      | 0 | 1         |
| rs12803321  | 11 | 118480115 | C | G | 0.009  | 0.993  | +  | 0     | 0.16   | 1 | 0.6892    |

|             |    |           |   |   |        |        |   |      |        |   |           |
|-------------|----|-----------|---|---|--------|--------|---|------|--------|---|-----------|
| rs118143963 | 11 | 116990523 | T | A | 0.009  | 0.9931 | + | 73.3 | 11.224 | 1 | 0.0008077 |
| rs186927602 | 11 | 116989133 | A | G | 0.009  | 0.9931 | + | 73.3 | 11.224 | 1 | 0.0008077 |
| rs61899013  | 11 | 119759046 | G | T | 0.009  | 0.9931 | + | 0    | 0      | 0 | 1         |
| rs4938817   | 11 | 120447136 | C | A | 0.009  | 0.9932 | + | 0    | 0      | 0 | 1         |
| rs2846103   | 11 | 120652208 | C | T | 0.008  | 0.9933 | + | 0    | 0      | 0 | 1         |
| rs657107    | 11 | 119865509 | T | C | -0.008 | 0.9933 | - | 0    | 0      | 0 | 1         |
| rs617948    | 11 | 118981025 | A | G | 0.008  | 0.9935 | + | 0    | 0      | 0 | 1         |
| rs674637    | 11 | 120025243 | G | A | -0.008 | 0.9935 | - | 0    | 0      | 0 | 1         |
| rs473219    | 11 | 119697182 | C | T | 0.008  | 0.9936 | + | 0    | 0      | 0 | 1         |
| rs530792    | 11 | 119983799 | T | C | -0.008 | 0.9936 | - | 0    | 0      | 0 | 1         |
| rs10892072  | 11 | 116960313 | G | A | -0.008 | 0.9938 | - | 0    | 0      | 0 | 1         |
| rs1944153   | 11 | 116532221 | C | T | 0.008  | 0.9939 | + | 0    | 0      | 0 | 1         |
| rs2155216   | 11 | 116531739 | T | C | 0.008  | 0.9939 | + | 0    | 0      | 0 | 1         |
| rs2186670   | 11 | 116531950 | T | C | 0.008  | 0.9939 | + | 0    | 0      | 0 | 1         |
| rs61900956  | 11 | 120537660 | G | A | -0.008 | 0.9939 | - | 0    | 0      | 0 | 1         |
| rs11217501  | 11 | 119652686 | C | T | 0.008  | 0.994  | + | 0    | 0      | 0 | 1         |
| rs12295127  | 11 | 117552758 | A | G | -0.008 | 0.994  | - | 0    | 0      | 0 | 1         |
| rs10790304  | 11 | 119420599 | T | G | 0.007  | 0.9941 | + | 0    | 0      | 0 | 1         |
| rs10790305  | 11 | 119420615 | A | G | 0.007  | 0.9941 | + | 0    | 0      | 0 | 1         |
| rs10892390  | 11 | 119420468 | T | C | 0.007  | 0.9941 | + | 0    | 0      | 0 | 1         |
| rs4936365   | 11 | 117016997 | C | T | -0.007 | 0.9941 | - | 0    | 0      | 0 | 1         |
| rs61898288  | 11 | 120093495 | A | C | 0.007  | 0.9943 | + | 0    | 0      | 0 | 1         |
| rs10892535  | 11 | 119967718 | T | C | -0.007 | 0.9945 | - | 0    | 0      | 0 | 1         |
| rs12802344  | 11 | 119975789 | G | T | -0.007 | 0.9945 | - | 0    | 0      | 0 | 1         |
| rs7120706   | 11 | 116830087 | T | C | -0.007 | 0.9945 | - | 0    | 0      | 0 | 1         |
| rs7120963   | 11 | 116830261 | T | C | -0.007 | 0.9945 | - | 0    | 0      | 0 | 1         |
| rs881123    | 11 | 117973047 | T | C | -0.007 | 0.9945 | + | 0    | 0.172  | 1 | 0.678     |
| rs10892048  | 11 | 116814596 | A | G | 0.006  | 0.9949 | + | 0    | 0      | 0 | 1         |
| rs10892537  | 11 | 119977230 | T | C | -0.006 | 0.9949 | - | 0    | 0      | 0 | 1         |
| rs75919952  | 11 | 116667545 | T | C | -0.006 | 0.9949 | + | 0    | 0.125  | 1 | 0.7239    |
| rs5014623   | 11 | 117731191 | C | T | 0.006  | 0.995  | + | 0    | 0      | 0 | 1         |
| rs60928822  | 11 | 117032641 | C | T | 0.006  | 0.995  | + | 73.1 | 11.135 | 1 | 0.000847  |
| rs7934805   | 11 | 120542648 | T | C | 0.006  | 0.9951 | + | 0    | 0      | 0 | 1         |
| rs12286021  | 11 | 118080685 | C | T | -0.006 | 0.9952 | + | 0    | 0.365  | 1 | 0.5455    |
| rs75173807  | 11 | 116511766 | A | G | 0.006  | 0.9952 | + | 0    | 0      | 0 | 1         |
| rs10790324  | 11 | 119498477 | A | G | -0.006 | 0.9954 | - | 0    | 0      | 0 | 1         |
| rs7113932   | 11 | 116985247 | T | G | 0.006  | 0.9955 | + | 0    | 0      | 0 | 1         |
| rs476399    | 11 | 116733728 | T | C | -0.006 | 0.9956 | - | 0    | 0      | 0 | 1         |
| rs472446    | 11 | 119785065 | G | A | 0.005  | 0.9958 | + | 0    | 0      | 0 | 1         |
| rs112111936 | 11 | 117045431 | G | T | -0.005 | 0.9959 | - | 0    | 0      | 0 | 1         |
| rs475189    | 11 | 121093766 | T | C | 0.005  | 0.9959 | + | 0    | 0.025  | 1 | 0.8735    |
| rs4938331   | 11 | 116930682 | C | A | -0.005 | 0.9959 | - | 0    | 0      | 0 | 1         |
| rs571429    | 11 | 121074575 | A | C | -0.005 | 0.9959 | + | 0    | 0.027  | 1 | 0.8688    |
| rs11217502  | 11 | 119652763 | A | G | -0.005 | 0.996  | - | 0    | 0      | 0 | 1         |
| rs76553074  | 11 | 117084070 | C | T | 0.005  | 0.996  | + | 73.1 | 11.14  | 1 | 0.0008447 |
| rs117146251 | 11 | 117005207 | G | A | 0.005  | 0.9963 | + | 73.6 | 11.344 | 1 | 0.0007567 |
| rs150672190 | 11 | 117004023 | T | C | 0.005  | 0.9963 | + | 73.6 | 11.344 | 1 | 0.0007567 |
| rs12360673  | 11 | 120544237 | G | A | -0.005 | 0.9964 | - | 0    | 0      | 0 | 1         |
| rs4331115   | 11 | 119650848 | T | C | 0.004  | 0.9966 | + | 0    | 0      | 0 | 1         |
| rs10892674  | 11 | 121002972 | A | G | -0.004 | 0.9967 | + | 0    | 0.826  | 1 | 0.3635    |
| rs11218153  | 11 | 121003224 | A | G | -0.004 | 0.9967 | + | 0    | 0.826  | 1 | 0.3635    |
| rs503559    | 11 | 119986167 | T | C | -0.004 | 0.9967 | - | 0    | 0      | 0 | 1         |
| rs7105712   | 11 | 121003358 | C | T | -0.004 | 0.9967 | + | 0    | 0.826  | 1 | 0.3635    |
| rs76188167  | 11 | 116471494 | A | G | -0.004 | 0.9967 | - | 0    | 0      | 0 | 1         |
| rs930430    | 11 | 116197720 | A | G | 0.004  | 0.9967 | + | 0    | 0      | 0 | 1         |
| rs11216750  | 11 | 117972543 | T | A | -0.004 | 0.9972 | + | 0    | 0.194  | 1 | 0.6599    |

|             |    |           |   |   |        |        |    |        |        |   |           |
|-------------|----|-----------|---|---|--------|--------|----|--------|--------|---|-----------|
| rs45496391  | 11 | 118477226 | C | A | 0.003  | 0.9972 | -+ | 0      | 0.079  | 1 | 0.7793    |
| rs10892415  | 11 | 119467192 | T | A | 0.003  | 0.9973 | +? | 0      | 0      | 0 | 1         |
| rs61562228  | 11 | 117053686 | A | G | 0.003  | 0.9973 | -+ | 73.6   | 11.349 | 1 | 0.0007547 |
| rs76638771  | 11 | 117552480 | C | T | -0.003 | 0.9973 | -? | 0      | 0      | 0 | 1         |
| rs61899019  | 11 | 119774394 | A | G | -0.003 | 0.9974 | -? | 0      | 0      | 0 | 1         |
| rs10790403  | 11 | 120712099 | C | T | 0.003  | 0.9976 | +? | 0      | 0      | 0 | 1         |
| rs10892448  | 11 | 119624823 | A | C | 0.003  | 0.9976 | +? | 0      | 0      | 0 | 1         |
| rs12791393  | 11 | 120058902 | T | C | 0.003  | 0.9976 | +? | 0      | 0      | 0 | 1         |
| rs1446105   | 11 | 116798544 | C | T | -0.003 | 0.9977 | -? | 0      | 0      | 0 | 1         |
| rs5014622   | 11 | 117731263 | G | A | -0.003 | 0.9977 | -? | 0      | 0      | 0 | 1         |
| rs117469840 | 11 | 117190901 | T | C | -0.003 | 0.9978 | -? | 0      | 0      | 0 | 1         |
| rs36015759  | 11 | 119216279 | A | G | 0.003  | 0.9978 | +? | 0      | 0      | 0 | 1         |
| rs79293063  | 11 | 119678083 | A | G | -0.003 | 0.9979 | -? | 0      | 0      | 0 | 1         |
| rs7951095   | 11 | 117011440 | C | A | -0.003 | 0.9979 | -? | 0      | 0      | 0 | 1         |
| rs10892534  | 11 | 119967716 | A | C | -0.003 | 0.998  | -? | 0      | 0      | 0 | 1         |
| rs117842423 | 11 | 117039208 | A | G | 0.002  | 0.998  | -+ | 73.6   | 11.353 | 1 | 0.0007534 |
| rs144762883 | 11 | 117035622 | T | C | 0.002  | 0.998  | -+ | 73.6   | 11.353 | 1 | 0.0007534 |
| rs580174    | 11 | 120100867 | G | A | -0.002 | 0.9981 | -? | 0      | 0      | 0 | 1         |
| rs59225422  | 11 | 116999303 | G | C | 0.002  | 0.9981 | -+ | 73.1   | 11.15  | 1 | 0.0008402 |
| rs59427601  | 11 | 119427371 | A | G | 0.002  | 0.9981 | +? | 0      | 0      | 0 | 1         |
| rs71484150  | 11 | 119727707 | G | T | -0.002 | 0.9981 | -? | 0      | 0      | 0 | 1         |
| rs9655      | 11 | 120100597 | G | A | -0.002 | 0.9981 | -? | 0      | 0      | 0 | 1         |
| rs7113123   | 11 | 119727494 | T | C | -0.002 | 0.9982 | -? | 0      | 0      | 0 | 1         |
| rs11822288  | 11 | 117283939 | A | G | -0.002 | 0.9983 | -? | 0      | 0      | 0 | 1         |
| rs4938344   | 11 | 117003749 | G | A | -0.002 | 0.9983 | -? | 0      | 0      | 0 | 1         |
| rs514557    | 11 | 121090430 | T | C | -0.002 | 0.9983 | -+ | 0      | 0.027  | 1 | 0.8702    |
| rs61898278  | 11 | 120085537 | G | A | 0.002  | 0.9983 | +? | 0      | 0      | 0 | 1         |
| rs61898279  | 11 | 120086365 | G | A | 0.002  | 0.9983 | +? | 0      | 0      | 0 | 1         |
| rs61898282  | 11 | 120090861 | T | C | -0.002 | 0.9983 | -? | 0      | 0      | 0 | 1         |
| rs6589790   | 11 | 119951200 | T | C | 0.002  | 0.9984 | +? | 0      | 0      | 0 | 1         |
| rs685710    | 11 | 121091284 | C | A | 0.002  | 0.9984 | -+ | 0      | 0.026  | 1 | 0.8721    |
| rs4936572   | 11 | 120872214 | A | G | -0.002 | 0.9985 | -? | 0      | 0      | 0 | 1         |
| rs585849    | 11 | 117069061 | A | G | -0.002 | 0.9985 | -? | 0      | 0      | 0 | 1         |
| rs613004    | 11 | 119967556 | T | C | -0.002 | 0.9985 | -? | 0      | 0      | 0 | 1         |
| rs1962593   | 11 | 116426097 | T | C | -0.002 | 0.9986 | -+ | 0      | 0.197  | 1 | 0.6572    |
| rs1945010   | 11 | 120617504 | T | C | 0.002  | 0.9987 | +? | 0      | 0      | 0 | 1         |
| rs10790221  | 11 | 117800326 | G | A | 0.002  | 0.9988 | -+ | -136.1 | 1.271  | 1 | 0.2596    |
| rs11604677  | 11 | 117800301 | A | G | 0.002  | 0.9988 | -+ | -136.1 | 1.271  | 1 | 0.2596    |
| rs56303423  | 11 | 119639182 | A | G | 0.002  | 0.9988 | +? | 0      | 0      | 0 | 1         |
| rs11216889  | 11 | 118421512 | A | G | 0.001  | 0.999  | +- | 0      | 0.012  | 1 | 0.9123    |
| rs4623916   | 11 | 119566825 | T | A | 0.001  | 0.999  | +? | 0      | 0      | 0 | 1         |
| rs4938332   | 11 | 116930798 | A | G | 0.001  | 0.999  | +? | 0      | 0      | 0 | 1         |
| rs4938334   | 11 | 116931042 | G | C | 0.001  | 0.999  | +? | 0      | 0      | 0 | 1         |
| rs57315752  | 11 | 117055485 | G | A | 0.001  | 0.9991 | -+ | 73.1   | 11.155 | 1 | 0.000838  |
| rs7116091   | 11 | 119497488 | C | T | 0.001  | 0.9991 | +? | 0      | 0      | 0 | 1         |
| rs112165411 | 11 | 120636109 | A | T | 0.001  | 0.9992 | +? | 0      | 0      | 0 | 1         |
| rs475724    | 11 | 119784660 | A | G | 0.001  | 0.9992 | +? | 0      | 0      | 0 | 1         |
| rs4938349   | 11 | 117021923 | C | T | 0.001  | 0.9992 | +? | 0      | 0      | 0 | 1         |
| rs5094      | 11 | 116693213 | A | G | 0.001  | 0.9992 | +- | -1.4   | 2.96   | 1 | 0.08535   |
| rs73010650  | 11 | 119796469 | A | G | -0.001 | 0.9992 | -? | 0      | 0      | 0 | 1         |
| rs506127    | 11 | 119984202 | A | G | 0.001  | 0.9993 | +? | 0      | 0      | 0 | 1         |
| rs57943482  | 11 | 120769383 | C | T | 0.001  | 0.9993 | +? | 0      | 0      | 0 | 1         |
| rs10750161  | 11 | 119498618 | A | G | 0.001  | 0.9994 | +? | 0      | 0      | 0 | 1         |
| rs56756054  | 11 | 116987421 | C | T | 0.001  | 0.9994 | -+ | 73.8   | 11.458 | 1 | 0.000712  |
| rs513944    | 11 | 120094936 | G | A | 0.001  | 0.9995 | +? | 0      | 0      | 0 | 1         |
| rs557827    | 11 | 121093832 | T | A | 0.001  | 0.9995 | -+ | 0      | 0.026  | 1 | 0.8714    |

|             |    |           |   |   |       |        |   |      |        |   |           |
|-------------|----|-----------|---|---|-------|--------|---|------|--------|---|-----------|
| rs1466051   | 11 | 119653461 | C | T | 0.001 | 0.9996 | + | 0    | 0      | 0 | 1         |
| rs7111799   | 11 | 119868171 | A | G | 0.001 | 0.9996 | + | 0    | 0      | 0 | 1         |
| rs11216267  | 11 | 116952392 | C | T | 0     | 0.9997 | + | 0    | 0      | 0 | 1         |
| rs2298831   | 11 | 118068752 | C | T | 0     | 0.9998 | - | 0    | 0.106  | 1 | 0.7447    |
| rs5026369   | 11 | 119652214 | C | G | 0     | 0.9998 | + | 0    | 0      | 0 | 1         |
| rs59007408  | 11 | 117032934 | T | C | 0     | 0.9999 | - | 73.1 | 11.16  | 1 | 0.0008358 |
| rs75115775  | 11 | 117030187 | C | A | 0     | 0.9999 | - | 73.1 | 11.159 | 1 | 0.0008363 |
| rs116896104 | 11 | 116976598 | A | G | 0     | 1      | - | 74.4 | 11.696 | 1 | 0.0006263 |

**Supplemental Data 2: Meta-analysis of SLE data in DDX6-CXCR5 locus (Dataset 2).**

| SNP        | CHR | BP(GRCh37/hg19) | A1 | A2 | Zscore | P.value  | Direction | HetISq | HetChiSq | HetDf | HetPVal |
|------------|-----|-----------------|----|----|--------|----------|-----------|--------|----------|-------|---------|
| rs11217045 | 11  | 118697865       | A  | C  | -6.36  | 2.02E-10 | ---       | 0      | 0.873    | 2     | 0.6462  |
| rs73005502 | 11  | 118697906       | G  | A  | -6.358 | 2.04E-10 | ---       | 0      | 0.879    | 2     | 0.6444  |
| rs11217046 | 11  | 118698907       | A  | G  | -6.302 | 2.93E-10 | ---       | 0      | 0.999    | 2     | 0.6067  |
| rs79504890 | 11  | 118701018       | A  | G  | -6.284 | 3.31E-10 | ---       | 0      | 0.95     | 2     | 0.6219  |
| rs10892293 | 11  | 118665575       | T  | A  | -6.267 | 3.69E-10 | ---       | 0      | 1.347    | 2     | 0.5099  |
| rs2077579  | 11  | 118619047       | G  | T  | -6.226 | 4.77E-10 | ---       | -66.7  | 2.399    | 2     | 0.3013  |
| rs11217037 | 11  | 118677086       | A  | G  | -6.189 | 6.06E-10 | ---       | 0      | 1.254    | 2     | 0.5341  |
| rs715412   | 11  | 118684610       | A  | G  | -6.177 | 6.54E-10 | ---       | 0      | 1.508    | 2     | 0.4706  |
| rs11217038 | 11  | 118677355       | A  | G  | -6.174 | 6.65E-10 | ---       | 0      | 1.301    | 2     | 0.5217  |
| rs28409215 | 11  | 118679304       | A  | G  | -6.172 | 6.76E-10 | ---       | 0      | 1.233    | 2     | 0.5399  |
| rs11217032 | 11  | 118669605       | A  | T  | -6.166 | 7.00E-10 | ---       | 0      | 1.328    | 2     | 0.5149  |
| rs11217033 | 11  | 118673706       | C  | T  | -6.163 | 7.14E-10 | ---       | 0      | 1.337    | 2     | 0.5124  |
| rs11217036 | 11  | 118675772       | T  | C  | -6.157 | 7.40E-10 | ---       | 0      | 1.357    | 2     | 0.5075  |
| rs4938573  | 11  | 118741842       | C  | T  | -6.108 | 1.01E-09 | ---       | 0      | 1.096    | 2     | 0.5782  |
| rs73005423 | 11  | 118681079       | G  | A  | -6.101 | 1.06E-09 | ---       | 0      | 1.375    | 2     | 0.5027  |
| rs11826521 | 11  | 118610549       | T  | G  | -6.099 | 1.07E-09 | ---       | -83.1  | 2.185    | 2     | 0.3353  |
| rs11217009 | 11  | 118615785       | T  | C  | -6.098 | 1.08E-09 | ---       | 0      | 1.988    | 2     | 0.3702  |
| rs10892294 | 11  | 118667357       | C  | G  | -6.096 | 1.09E-09 | ---       | 0      | 1.253    | 2     | 0.5345  |
| rs1048024  | 11  | 118618776       | T  | A  | -6.094 | 1.11E-09 | ---       | -84.7  | 2.165    | 2     | 0.3387  |
| rs10892280 | 11  | 118611817       | T  | C  | -6.084 | 1.17E-09 | ---       | -90.4  | 2.101    | 2     | 0.3498  |
| rs3889239  | 11  | 118619960       | T  | C  | -6.081 | 1.19E-09 | ---       | -93.5  | 2.068    | 2     | 0.3557  |
| rs2004781  | 11  | 118619253       | T  | C  | -6.077 | 1.22E-09 | ---       | -91.9  | 2.085    | 2     | 0.3526  |
| rs75249660 | 11  | 118721565       | A  | G  | -6.074 | 1.25E-09 | ---       | 0      | 0.945    | 2     | 0.6236  |
| rs11217058 | 11  | 118722149       | A  | G  | -6.07  | 1.28E-09 | ---       | 0      | 0.933    | 2     | 0.6272  |
| rs56758835 | 11  | 118615340       | A  | G  | -6.069 | 1.29E-09 | ---       | 0      | 1.961    | 2     | 0.3751  |
| rs74676029 | 11  | 118628373       | T  | C  | -6.044 | 1.51E-09 | ---       | -83.2  | 2.183    | 2     | 0.3356  |
| rs10892290 | 11  | 118653503       | T  | G  | -6.035 | 1.59E-09 | ---       | -81.5  | 2.204    | 2     | 0.3323  |
| rs874621   | 11  | 118655645       | A  | G  | -6.034 | 1.60E-09 | ---       | -85.4  | 2.158    | 2     | 0.3399  |
| rs10892291 | 11  | 118653517       | T  | C  | -6.032 | 1.62E-09 | ---       | -80.6  | 2.215    | 2     | 0.3305  |
| rs10892287 | 11  | 118642999       | C  | T  | -6.007 | 1.89E-09 | ---       | -71.6  | 2.331    | 2     | 0.3118  |
| rs10892288 | 11  | 118644694       | G  | A  | -6.007 | 1.89E-09 | ---       | -76.1  | 2.271    | 2     | 0.3212  |
| rs11217020 | 11  | 118639353       | A  | G  | -5.994 | 2.04E-09 | ---       | -79.8  | 2.224    | 2     | 0.3289  |
| rs10892289 | 11  | 118646003       | T  | C  | -5.991 | 2.08E-09 | ---       | -82.6  | 2.191    | 2     | 0.3344  |
| rs10892292 | 11  | 118655340       | C  | G  | -5.988 | 2.12E-09 | ---       | -81.6  | 2.203    | 2     | 0.3324  |
| rs10892286 | 11  | 118642085       | C  | A  | -5.981 | 2.22E-09 | ---       | -70.9  | 2.34     | 2     | 0.3103  |
| rs56043232 | 11  | 118648373       | T  | C  | -5.977 | 2.27E-09 | ---       | -79.4  | 2.229    | 2     | 0.328   |
| rs11217019 | 11  | 118636343       | A  | C  | -5.975 | 2.30E-09 | ---       | -72    | 2.325    | 2     | 0.3126  |
| rs10892283 | 11  | 118636980       | G  | A  | -5.971 | 2.36E-09 | ---       | -68    | 2.381    | 2     | 0.3041  |
| rs7119044  | 11  | 118738298       | G  | C  | -5.964 | 2.47E-09 | ---       | 0      | 0.75     | 2     | 0.6873  |
| rs11217074 | 11  | 118734000       | C  | T  | -5.962 | 2.49E-09 | ---       | 0      | 0.756    | 2     | 0.6851  |
| rs11217066 | 11  | 118726753       | G  | T  | -5.961 | 2.51E-09 | ---       | 0      | 0.921    | 2     | 0.6309  |
| rs7122669  | 11  | 118739056       | A  | G  | -5.958 | 2.55E-09 | ---       | 0      | 0.728    | 2     | 0.6948  |
| rs6589684  | 11  | 118610957       | A  | G  | -5.958 | 2.55E-09 | ---       | 0      | 1.355    | 2     | 0.508   |
| rs74541740 | 11  | 118742800       | A  | G  | -5.945 | 2.77E-09 | ---       | 0      | 0.814    | 2     | 0.6658  |
| rs4936444  | 11  | 118743338       | T  | C  | -5.944 | 2.79E-09 | ---       | 0      | 0.857    | 2     | 0.6516  |
| rs7951740  | 11  | 118740418       | G  | C  | -5.942 | 2.82E-09 | ---       | 0      | 0.841    | 2     | 0.6567  |
| rs4936441  | 11  | 118725660       | C  | G  | -5.935 | 2.94E-09 | ---       | 0      | 0.985    | 2     | 0.6111  |
| rs57494551 | 11  | 118661398       | T  | C  | -5.923 | 3.16E-09 | ---       | -63.2  | 2.451    | 2     | 0.2937  |
| rs7117261  | 11  | 118741157       | T  | C  | -5.91  | 3.42E-09 | ---       | 0      | 0.84     | 2     | 0.657   |
| rs10790268 | 11  | 118729391       | A  | G  | -5.825 | 5.71E-09 | ---       | 0      | 0.997    | 2     | 0.6074  |
| rs10790269 | 11  | 118729456       | C  | T  | -5.812 | 6.17E-09 | ---       | 0      | 1.03     | 2     | 0.5976  |
| rs4936443  | 11  | 118740864       | C  | T  | -5.804 | 6.47E-09 | ---       | 0      | 0.94     | 2     | 0.6249  |

|             |    |           |   |   |        |          |     |       |       |   |        |
|-------------|----|-----------|---|---|--------|----------|-----|-------|-------|---|--------|
| rs77209083  | 11 | 118607569 | G | A | -5.751 | 8.87E-09 | --- | 0     | 1.725 | 2 | 0.4221 |
| rs11217001  | 11 | 118607046 | A | G | -5.75  | 8.92E-09 | --- | 0     | 1.974 | 2 | 0.3726 |
| rs4938572   | 11 | 118740931 | C | T | -5.555 | 2.77E-08 | --- | 0     | 0.354 | 2 | 0.8378 |
| rs7481819   | 11 | 118745278 | C | T | -5.49  | 4.02E-08 | --- | 0     | 0.239 | 2 | 0.8874 |
| rs7481797   | 11 | 118745243 | A | G | -5.475 | 4.37E-08 | --- | 0     | 0.255 | 2 | 0.8803 |
| rs7117313   | 11 | 118744396 | C | G | -5.372 | 7.79E-08 | --- | 0     | 0.652 | 2 | 0.7216 |
| rs10790275  | 11 | 118745884 | G | C | -5.364 | 8.16E-08 | --- | 0     | 0.479 | 2 | 0.787  |
| rs10892271  | 11 | 118598544 | A | G | -5.343 | 9.14E-08 | --- | -47.9 | 2.704 | 2 | 0.2588 |
| rs10892273  | 11 | 118602809 | A | G | -5.336 | 9.51E-08 | --- | -35.7 | 2.948 | 2 | 0.229  |
| rs10892272  | 11 | 118602707 | G | C | -5.32  | 1.04E-07 | --- | -32.3 | 3.024 | 2 | 0.2205 |
| rs11216997  | 11 | 118604638 | T | C | -5.299 | 1.16E-07 | --- | -18.2 | 3.384 | 2 | 0.1841 |
| rs7119038   | 11 | 118738281 | G | A | -5.297 | 1.18E-07 | --- | 0     | 1.508 | 2 | 0.4705 |
| rs11216980  | 11 | 118590668 | A | C | -5.287 | 1.24E-07 | --- | -47   | 2.721 | 2 | 0.2565 |
| rs11217044  | 11 | 118696022 | C | T | -5.271 | 1.36E-07 | --- | 0     | 1.88  | 2 | 0.3906 |
| rs112561833 | 11 | 118603736 | C | A | -5.267 | 1.39E-07 | --- | -23.5 | 3.238 | 2 | 0.1981 |
| rs10892263  | 11 | 118587319 | C | T | -5.222 | 1.77E-07 | --- | -38   | 2.899 | 2 | 0.2347 |
| rs12421790  | 11 | 118588952 | T | C | -5.21  | 1.89E-07 | --- | -43.9 | 2.78  | 2 | 0.2491 |
| rs11217040  | 11 | 118680648 | A | C | -5.159 | 2.49E-07 | --- | -94.6 | 2.056 | 2 | 0.3578 |
| rs11217006  | 11 | 118609790 | A | G | -5.077 | 3.84E-07 | --- | -74.2 | 2.296 | 2 | 0.3173 |
| rs17122453  | 11 | 118683564 | A | G | -5.065 | 4.09E-07 | --- | 0     | 1.991 | 2 | 0.3696 |
| rs11216995  | 11 | 118603526 | A | G | -5.044 | 4.56E-07 | --- | -34   | 2.985 | 2 | 0.2248 |
| rs10892279  | 11 | 118611781 | A | G | -5.037 | 4.73E-07 | --- | 0     | 1.956 | 2 | 0.376  |
| rs6589685   | 11 | 118612197 | C | T | -5.03  | 4.90E-07 | --- | 0     | 1.878 | 2 | 0.3911 |
| rs11216994  | 11 | 118603520 | T | C | -5.025 | 5.02E-07 | --- | -36.9 | 2.921 | 2 | 0.2321 |
| rs10892262  | 11 | 118587097 | C | G | -5.024 | 5.05E-07 | --- | -59.4 | 2.51  | 2 | 0.2851 |
| rs6589686   | 11 | 118612565 | A | G | -5.024 | 5.07E-07 | --- | 0     | 1.15  | 2 | 0.5626 |
| rs73005426  | 11 | 118681083 | G | A | -5.006 | 5.57E-07 | --- | 0     | 1.707 | 2 | 0.4259 |
| rs11217042  | 11 | 118682528 | A | G | -4.997 | 5.83E-07 | --- | 0     | 1.731 | 2 | 0.4208 |
| rs73001429  | 11 | 118603165 | G | T | -4.989 | 6.08E-07 | --- | -40.1 | 2.855 | 2 | 0.2399 |
| rs7942535   | 11 | 118681464 | C | T | -4.986 | 6.17E-07 | --- | 0     | 1.744 | 2 | 0.4181 |
| rs11217041  | 11 | 118682350 | G | A | -4.984 | 6.22E-07 | --- | 0     | 1.746 | 2 | 0.4177 |
| rs12365699  | 11 | 118743286 | A | G | -4.976 | 6.49E-07 | --- | 0     | 0.647 | 2 | 0.7235 |
| rs7945144   | 11 | 118608716 | G | A | -4.965 | 6.86E-07 | --- | 0     | 1.971 | 2 | 0.3732 |
| rs2155433   | 11 | 118612921 | A | G | -4.963 | 6.95E-07 | --- | 0     | 1.92  | 2 | 0.3829 |
| rs7123726   | 11 | 118694547 | C | T | -4.961 | 7.02E-07 | --- | 0     | 1.613 | 2 | 0.4465 |
| rs12364971  | 11 | 118607794 | G | T | -4.953 | 7.32E-07 | --- | 0     | 1.921 | 2 | 0.3827 |
| rs76409436  | 11 | 118607871 | A | G | -4.945 | 7.61E-07 | --- | -94.8 | 2.053 | 2 | 0.3583 |
| rs73003215  | 11 | 118649512 | A | G | -4.935 | 8.00E-07 | --- | 0     | 1.956 | 2 | 0.376  |
| rs11216993  | 11 | 118603495 | A | T | -4.929 | 8.28E-07 | --- | -45.1 | 2.757 | 2 | 0.2519 |
| rs12421793  | 11 | 118589012 | A | C | -4.918 | 8.75E-07 | --- | -40.7 | 2.843 | 2 | 0.2413 |
| rs56267528  | 11 | 118607311 | A | C | -4.816 | 1.46E-06 | --- | 0     | 1.6   | 2 | 0.4492 |
| rs55894437  | 11 | 118607417 | T | C | -4.807 | 1.53E-06 | --- | 0     | 1.603 | 2 | 0.4486 |
| rs11217002  | 11 | 118607150 | T | C | -4.806 | 1.54E-06 | --- | 0     | 1.851 | 2 | 0.3962 |
| rs6589682   | 11 | 118606722 | T | C | -4.79  | 1.67E-06 | --- | 0     | 1.754 | 2 | 0.416  |
| rs11216956  | 11 | 118575326 | A | G | -4.536 | 5.73E-06 | --- | -86.3 | 2.147 | 2 | 0.3419 |
| rs11216972  | 11 | 118585826 | T | C | -4.508 | 6.56E-06 | --- | -38.3 | 2.892 | 2 | 0.2355 |
| rs598373    | 11 | 118664377 | T | C | -4.455 | 8.40E-06 | --- | 0     | 0.137 | 2 | 0.9336 |
| rs477014    | 11 | 118678986 | C | T | -4.424 | 9.67E-06 | --- | 0     | 0.127 | 2 | 0.9387 |
| rs476246    | 11 | 118617920 | T | C | -4.424 | 9.70E-06 | --- | 0     | 0.122 | 2 | 0.9407 |
| rs540180    | 11 | 118653629 | T | G | -4.412 | 1.03E-05 | --- | 0     | 0.111 | 2 | 0.946  |
| rs2508916   | 11 | 118654651 | G | C | -4.409 | 1.04E-05 | --- | 0     | 0.11  | 2 | 0.9467 |
| rs581062    | 11 | 118624767 | A | G | -4.406 | 1.06E-05 | --- | 0     | 0.111 | 2 | 0.9458 |
| rs472641    | 11 | 118617544 | G | A | -4.4   | 1.08E-05 | --- | 0     | 0.123 | 2 | 0.9405 |
| rs688161    | 11 | 118677710 | G | A | -4.396 | 1.10E-05 | --- | 0     | 0.109 | 2 | 0.947  |

|             |    |           |   |   |        |           |     |       |       |   |         |
|-------------|----|-----------|---|---|--------|-----------|-----|-------|-------|---|---------|
| rs591756    | 11 | 118678881 | T | C | -4.389 | 1.14E-05  | --- | 0     | 0.106 | 2 | 0.9483  |
| rs10892259  | 11 | 118583002 | A | G | -4.386 | 1.15E-05  | --- | 0     | 1.996 | 2 | 0.3687  |
| rs1784293   | 11 | 118652373 | C | A | -4.386 | 1.16E-05  | --- | 0     | 0.099 | 2 | 0.9517  |
| rs2508570   | 11 | 118678609 | A | G | -4.382 | 1.17E-05  | --- | 0     | 0.102 | 2 | 0.9502  |
| rs473298    | 11 | 118679387 | G | A | -4.382 | 1.17E-05  | --- | 0     | 0.101 | 2 | 0.9508  |
| rs10892260  | 11 | 118583525 | C | A | -4.378 | 1.20E-05  | --- | -81.4 | 2.205 | 2 | 0.332   |
| rs11216969  | 11 | 118584340 | C | T | -4.378 | 1.20E-05  | --- | -90.1 | 2.104 | 2 | 0.3493  |
| rs516719    | 11 | 118679445 | C | T | -4.375 | 1.21E-05  | --- | 0     | 0.097 | 2 | 0.9526  |
| rs2508569   | 11 | 118680045 | C | G | -4.374 | 1.22E-05  | --- | 0     | 0.095 | 2 | 0.9538  |
| rs1790189   | 11 | 118652326 | G | T | -4.371 | 1.24E-05  | --- | 0     | 0.093 | 2 | 0.9547  |
| rs10790261  | 11 | 118579747 | G | A | -4.365 | 1.27E-05  | --- | -91   | 2.094 | 2 | 0.351   |
| rs11216960  | 11 | 118577873 | A | G | -4.361 | 1.30E-05  | --- | -77.9 | 2.249 | 2 | 0.3249  |
| rs524590    | 11 | 118640063 | T | A | -4.36  | 1.30E-05  | --- | 0     | 0.08  | 2 | 0.9607  |
| rs487728    | 11 | 118621495 | G | C | -4.353 | 1.34E-05  | --- | 0     | 0.115 | 2 | 0.944   |
| rs11216965  | 11 | 118582613 | A | C | -4.344 | 1.40E-05  | --- | -84.7 | 2.165 | 2 | 0.3387  |
| rs10892319  | 11 | 118870413 | T | C | -4.34  | 1.43E-05  | -?- | 0     | 0.032 | 1 | 0.8572  |
| rs10892256  | 11 | 118578705 | A | G | -4.336 | 1.45E-05  | --- | -84.3 | 2.17  | 2 | 0.3378  |
| rs10892257  | 11 | 118579327 | A | G | -4.335 | 1.46E-05  | --- | -83.3 | 2.182 | 2 | 0.3358  |
| rs10892258  | 11 | 118579865 | A | G | -4.33  | 1.49E-05  | --- | -85.4 | 2.157 | 2 | 0.34    |
| rs562059    | 11 | 118602058 | G | T | -4.325 | 1.52E-05  | --- | 0     | 0.416 | 2 | 0.812   |
| rs11216964  | 11 | 118581895 | A | G | -4.322 | 1.55E-05  | --- | -82   | 2.198 | 2 | 0.3332  |
| rs478081    | 11 | 118602497 | G | A | -4.321 | 1.55E-05  | --- | 0     | 0.406 | 2 | 0.8162  |
| rs4938617   | 11 | 118867695 | T | C | -4.32  | 1.56E-05  | -?- | 0     | 0.053 | 1 | 0.818   |
| rs11216961  | 11 | 118580338 | G | C | -4.319 | 1.56E-05  | --- | -83.7 | 2.177 | 2 | 0.3367  |
| rs499343    | 11 | 118626511 | T | C | -4.31  | 1.63E-05  | --- | 0     | 0.077 | 2 | 0.9624  |
| rs9645663   | 11 | 118873840 | C | T | -4.28  | 1.87E-05  | -?- | 0     | 0.014 | 1 | 0.9045  |
| rs11216962  | 11 | 118580813 | C | T | -4.278 | 1.89E-05  | --- | -94.5 | 2.056 | 2 | 0.3577  |
| rs11216963  | 11 | 118580814 | A | G | -4.278 | 1.89E-05  | --- | -94.5 | 2.056 | 2 | 0.3577  |
| rs11606199  | 11 | 118811641 | A | G | -4.272 | 1.93E-05  | -?- | 0     | 0.017 | 1 | 0.896   |
| rs11216999  | 11 | 118604941 | C | T | -4.26  | 2.05E-05  | --- | 0     | 1.349 | 2 | 0.5095  |
| rs7125066   | 11 | 118721699 | G | A | -4.216 | 2.48E-05  | --- | 31.9  | 5.877 | 2 | 0.05295 |
| rs9736016   | 11 | 118724894 | A | T | -4.155 | 3.26E-05  | --- | 30.6  | 5.768 | 2 | 0.05592 |
| rs111345266 | 11 | 118893767 | T | C | -4.144 | 3.42E-05  | -?- | 0     | 0.008 | 1 | 0.9287  |
| rs74884652  | 11 | 118876552 | C | T | -4.136 | 3.54E-05  | -?- | 0     | 0.003 | 1 | 0.9572  |
| rs4938619   | 11 | 118890085 | T | C | -4.131 | 3.62E-05  | -?- | 0     | 0.008 | 1 | 0.9282  |
| rs75154936  | 11 | 118877891 | C | T | -4.118 | 3.82E-05  | -?- | 0     | 0.001 | 1 | 0.9712  |
| rs10892247  | 11 | 118490076 | A | G | -4.113 | 3.91E-05  | --- | 0     | 1.322 | 2 | 0.5163  |
| rs76253444  | 11 | 118876213 | G | A | -4.105 | 4.05E-05  | -?- | 0     | 0     | 1 | 0.9891  |
| rs537080    | 11 | 118826045 | C | T | -4.019 | 5.84E-05  | -?- | 0     | 0.102 | 1 | 0.75    |
| rs10892316  | 11 | 118831755 | T | C | -4.016 | 5.91E-05  | -?- | 0     | 0.093 | 1 | 0.7609  |
| rs112939258 | 11 | 118834718 | T | C | -3.998 | 6.38E-05  | -?- | 0     | 0.085 | 1 | 0.77    |
| rs11216998  | 11 | 118604837 | T | C | -3.979 | 6.91E-05  | --- | 0     | 1.49  | 2 | 0.4748  |
| rs111358668 | 11 | 118834508 | A | G | -3.964 | 7.38E-05  | -?- | 0     | 0.076 | 1 | 0.7828  |
| rs45586434  | 11 | 118828184 | A | C | -3.956 | 7.63E-05  | -?- | 0     | 0.009 | 1 | 0.9228  |
| rs113962716 | 11 | 118853021 | A | C | -3.941 | 8.11E-05  | -?- | 0     | 0.085 | 1 | 0.7701  |
| rs80126726  | 11 | 118852647 | A | G | -3.938 | 8.21E-05  | -?- | 0     | 0.149 | 1 | 0.6993  |
| rs11217109  | 11 | 118853774 | C | T | -3.924 | 8.71E-05  | -?- | 0     | 0.097 | 1 | 0.756   |
| rs507763    | 11 | 118824683 | C | G | -3.918 | 8.95E-05  | -?- | 0     | 0.129 | 1 | 0.719   |
| rs12362152  | 11 | 118516737 | G | A | -3.904 | 9.47E-05  | --- | 0     | 1.191 | 2 | 0.5512  |
| rs11216937  | 11 | 118507478 | T | C | -3.89  | 0.0001004 | --- | 0     | 1.175 | 2 | 0.5558  |
| rs73001406  | 11 | 118560857 | A | G | -3.881 | 0.000104  | --- | -21.6 | 3.29  | 2 | 0.193   |
| rs80015904  | 11 | 118516903 | A | G | -3.863 | 0.0001118 | --- | 0     | 1.129 | 2 | 0.5687  |
| rs77683570  | 11 | 118495287 | C | T | -3.861 | 0.0001129 | --- | 0     | 1.168 | 2 | 0.5577  |
| rs11216938  | 11 | 118514625 | T | C | -3.858 | 0.0001141 | --- | 0     | 1.062 | 2 | 0.5881  |

|             |    |           |   |   |        |           |     |       |       |   |         |
|-------------|----|-----------|---|---|--------|-----------|-----|-------|-------|---|---------|
| rs10892307  | 11 | 118754649 | G | C | -3.854 | 0.0001161 | --- | -91.3 | 2.09  | 2 | 0.3516  |
| rs10892277  | 11 | 118605841 | A | G | -3.852 | 0.0001171 | --- | 0     | 0.906 | 2 | 0.6358  |
| rs10892274  | 11 | 118605463 | T | C | -3.847 | 0.0001197 | --- | 0     | 0.919 | 2 | 0.6317  |
| rs45565037  | 11 | 118496119 | A | G | -3.845 | 0.0001208 | --- | 0     | 1.098 | 2 | 0.5776  |
| rs12365095  | 11 | 118516774 | T | C | -3.844 | 0.000121  | --- | 0     | 1.053 | 2 | 0.5906  |
| rs3176905   | 11 | 118755630 | C | T | -3.836 | 0.0001253 | --- | 0     | 1.651 | 2 | 0.4381  |
| rs10892251  | 11 | 118543563 | T | C | -3.826 | 0.0001303 | --- | -17.6 | 3.402 | 2 | 0.1825  |
| rs2277296   | 11 | 118550522 | C | T | -3.826 | 0.0001303 | --- | -12.1 | 3.569 | 2 | 0.1679  |
| rs7928371   | 11 | 118529127 | A | G | -3.818 | 0.0001344 | --- | 0     | 1.099 | 2 | 0.5772  |
| rs17748     | 11 | 118528424 | T | C | -3.815 | 0.0001364 | --- | 0     | 1.111 | 2 | 0.5739  |
| rs10892252  | 11 | 118555692 | G | A | -3.813 | 0.0001375 | --- | -15   | 3.479 | 2 | 0.1756  |
| rs10790256  | 11 | 118534082 | T | C | -3.81  | 0.0001391 | --- | 0     | 1.128 | 2 | 0.5691  |
| rs12225548  | 11 | 118535840 | G | C | -3.808 | 0.0001399 | --- | 0     | 1.331 | 2 | 0.5141  |
| rs2236661   | 11 | 118499394 | G | C | -3.803 | 0.0001428 | --- | 0     | 1.186 | 2 | 0.5527  |
| rs10892275  | 11 | 118605617 | A | T | -3.796 | 0.0001468 | --- | 0     | 0.844 | 2 | 0.6559  |
| rs10892276  | 11 | 118605628 | A | G | -3.794 | 0.0001485 | --- | 0     | 0.843 | 2 | 0.6561  |
| rs2276065   | 11 | 118530611 | C | T | -3.79  | 0.0001505 | --- | 0     | 1.531 | 2 | 0.465   |
| rs45540840  | 11 | 118486110 | A | G | -3.773 | 0.0001613 | --- | 0     | 1.309 | 2 | 0.5196  |
| rs496547    | 11 | 118576463 | A | T | -3.767 | 0.0001655 | --- | 0     | 0.352 | 2 | 0.8385  |
| rs11216930  | 11 | 118488782 | C | A | -3.757 | 0.0001721 | --- | 0     | 0.779 | 2 | 0.6774  |
| rs10892248  | 11 | 118501022 | A | G | -3.656 | 0.0002557 | --- | 0     | 1.325 | 2 | 0.5156  |
| rs11602393  | 11 | 118750967 | A | T | -3.562 | 0.0003683 | --- | 0     | 1.434 | 2 | 0.4882  |
| rs4938513   | 11 | 118419704 | T | C | -3.438 | 0.0005856 | --- | 0     | 0.814 | 2 | 0.6656  |
| rs11216943  | 11 | 118556398 | A | G | -3.426 | 0.0006121 | --- | 14.5  | 4.676 | 2 | 0.09651 |
| rs7943247   | 11 | 72881957  | G | A | -3.422 | 0.0006226 | --- | 45.7  | 7.363 | 2 | 0.02518 |
| rs741811    | 11 | 118898319 | A | G | -3.418 | 0.0006301 | -?- | 0     | 0.455 | 1 | 0.5001  |
| rs10790255  | 11 | 118515579 | G | T | -3.359 | 0.0007828 | --- | 0     | 1.489 | 2 | 0.475   |
| rs2276423   | 11 | 118210106 | G | C | 3.32   | 0.0008998 | +?+ | 0     | 0.007 | 1 | 0.9317  |
| rs4938506   | 11 | 118205702 | A | G | 3.281  | 0.001033  | +?+ | 0     | 0.002 | 1 | 0.9683  |
| rs7937334   | 11 | 118191274 | T | C | 3.274  | 0.001059  | +?+ | 0     | 0.004 | 1 | 0.9481  |
| rs633308    | 11 | 118459069 | G | A | -3.211 | 0.001321  | --- | 0     | 0.719 | 2 | 0.6979  |
| rs4936428   | 11 | 118187511 | T | C | 3.155  | 0.001605  | +?+ | 0     | 0.006 | 1 | 0.9384  |
| rs573905    | 11 | 118572267 | A | G | 3.152  | 0.00162   | +++ | 0     | 0.995 | 2 | 0.608   |
| rs10892306  | 11 | 118751326 | A | T | -3.147 | 0.001652  | --- | 0     | 1.626 | 2 | 0.4435  |
| rs4938576   | 11 | 118746769 | T | G | -3.138 | 0.0017    | --- | 0     | 1.074 | 2 | 0.5846  |
| rs75438046  | 11 | 118767564 | A | G | -3.132 | 0.001738  | -+- | 42.8  | 6.995 | 2 | 0.03028 |
| rs542266    | 11 | 118422240 | A | C | -3.126 | 0.001771  | --- | 0     | 0.537 | 2 | 0.7647  |
| rs2276424   | 11 | 118209960 | A | C | 3.06   | 0.002212  | +?+ | 0     | 0.077 | 1 | 0.7811  |
| rs78041268  | 11 | 118763313 | A | G | -3.05  | 0.002285  | -+- | 36.6  | 6.313 | 2 | 0.04256 |
| rs149114341 | 11 | 118783424 | A | G | -3.039 | 0.002371  | -+- | 36.7  | 6.318 | 2 | 0.04246 |
| rs61036532  | 11 | 72017321  | G | A | 3.007  | 0.002638  | +++ | 0     | 1.24  | 2 | 0.538   |
| rs77841686  | 11 | 118762073 | A | G | -2.998 | 0.002717  | -+- | 34.8  | 6.136 | 2 | 0.0465  |
| rs56076328  | 11 | 72023279  | A | G | 2.989  | 0.002795  | +++ | 0     | 1.332 | 2 | 0.5138  |
| rs11217065  | 11 | 118726647 | C | T | 2.988  | 0.002812  | +++ | -40.9 | 2.839 | 2 | 0.2418  |
| rs3750906   | 11 | 72012682  | G | A | 2.987  | 0.002815  | +++ | 0     | 1.303 | 2 | 0.5212  |
| rs586763    | 11 | 118816304 | T | C | -2.984 | 0.002841  | -?- | 0     | 0.228 | 1 | 0.6331  |
| rs11217063  | 11 | 118725942 | C | G | 2.978  | 0.002897  | +++ | -39.8 | 2.86  | 2 | 0.2393  |
| rs7110837   | 11 | 118199295 | A | G | 2.975  | 0.002932  | +?+ | 0     | 0.082 | 1 | 0.7741  |
| rs12421674  | 11 | 72056591  | T | C | 2.967  | 0.003012  | +++ | 0     | 1.632 | 2 | 0.4422  |
| rs12418637  | 11 | 72061218  | A | G | 2.966  | 0.003017  | +++ | 0     | 0.829 | 2 | 0.6608  |
| rs57719838  | 11 | 118724723 | C | T | 2.965  | 0.003024  | +++ | -36.9 | 2.922 | 2 | 0.232   |
| rs56171963  | 11 | 72009455  | G | A | 2.961  | 0.003063  | +++ | 0     | 1.361 | 2 | 0.5064  |
| rs11216853  | 11 | 118200201 | T | A | 2.959  | 0.003083  | +?+ | 0     | 0.123 | 1 | 0.7257  |
| rs56148078  | 11 | 72529358  | A | C | -2.954 | 0.003133  | +-- | 47.2  | 7.572 | 2 | 0.02268 |

|            |    |           |   |   |        |          |     |        |       |   |         |
|------------|----|-----------|---|---|--------|----------|-----|--------|-------|---|---------|
| rs6589659  | 11 | 118191691 | A | C | 2.952  | 0.00316  | +?+ | 0      | 0.044 | 1 | 0.8334  |
| rs58044536 | 11 | 72011227  | G | A | 2.949  | 0.003187 | +++ | 0      | 1.247 | 2 | 0.5361  |
| rs58945323 | 11 | 72042223  | C | T | 2.948  | 0.003194 | +++ | 0      | 1.409 | 2 | 0.4943  |
| rs7103067  | 11 | 118723379 | A | G | 2.948  | 0.003194 | +++ | -32.3  | 3.023 | 2 | 0.2206  |
| rs10892246 | 11 | 118481431 | A | G | -2.946 | 0.003219 | --- | -97.2  | 2.028 | 2 | 0.3627  |
| rs633683   | 11 | 118504742 | T | C | 2.94   | 0.003281 | +?+ | -78.8  | 1.678 | 1 | 0.1952  |
| rs17162126 | 11 | 72057178  | T | A | 2.93   | 0.003395 | +++ | 0      | 1.573 | 2 | 0.4553  |
| rs11217091 | 11 | 118793613 | C | T | -2.929 | 0.003396 | +-- | 43.9   | 7.131 | 2 | 0.02828 |
| rs4936442  | 11 | 118728320 | T | C | 2.922  | 0.003473 | +++ | -44.7  | 2.765 | 2 | 0.2509  |
| rs12223292 | 11 | 72487259  | A | G | -2.917 | 0.003534 | ++- | 47.8   | 7.666 | 2 | 0.02164 |
| rs58941166 | 11 | 72083441  | A | G | 2.913  | 0.003574 | +++ | 0      | 1.001 | 2 | 0.6061  |
| rs55721826 | 11 | 72019162  | G | A | 2.913  | 0.003584 | +++ | 0      | 1.436 | 2 | 0.4877  |
| rs34782343 | 11 | 118153511 | G | T | 2.912  | 0.003589 | +?+ | -157.7 | 1.164 | 1 | 0.2806  |
| rs11217067 | 11 | 118727332 | T | G | 2.912  | 0.003592 | +++ | -45.5  | 2.749 | 2 | 0.2529  |
| rs10790267 | 11 | 118727169 | T | C | 2.912  | 0.003596 | +++ | -45.5  | 2.75  | 2 | 0.2528  |
| rs73530724 | 11 | 72049158  | G | A | 2.91   | 0.003619 | +++ | 0      | 1.439 | 2 | 0.487   |
| rs12790489 | 11 | 118729583 | C | T | 2.909  | 0.003629 | +++ | -54.4  | 2.591 | 2 | 0.2738  |
| rs11217070 | 11 | 118729860 | G | T | 2.901  | 0.003716 | +++ | -53.4  | 2.608 | 2 | 0.2715  |
| rs12416804 | 11 | 72048526  | G | T | 2.9    | 0.003735 | +++ | 0      | 1.448 | 2 | 0.4849  |
| rs3889234  | 11 | 72490986  | C | T | -2.899 | 0.003742 | ++- | 49.5   | 7.914 | 2 | 0.01912 |
| rs10892300 | 11 | 118729210 | T | C | 2.891  | 0.003843 | +++ | -56.3  | 2.56  | 2 | 0.2781  |
| rs73530718 | 11 | 72045813  | C | T | 2.891  | 0.003846 | +++ | 0      | 1.444 | 2 | 0.4857  |
| rs71482159 | 11 | 118809204 | T | C | -2.884 | 0.003922 | -?- | 0      | 0.012 | 1 | 0.9136  |
| rs11217072 | 11 | 118731762 | G | A | 2.882  | 0.003957 | +++ | -62.2  | 2.466 | 2 | 0.2915  |
| rs34561290 | 11 | 118731599 | T | C | 2.88   | 0.003974 | +++ | -62.1  | 2.468 | 2 | 0.2911  |
| rs504217   | 11 | 72006086  | T | C | 2.879  | 0.003995 | +++ | 0      | 1.217 | 2 | 0.5442  |
| rs474629   | 11 | 72006977  | C | G | 2.875  | 0.004042 | +++ | 0      | 1.069 | 2 | 0.5859  |
| rs7929520  | 11 | 118730141 | G | A | 2.872  | 0.004084 | +++ | -49.1  | 2.683 | 2 | 0.2614  |
| rs680660   | 11 | 72004714  | C | T | 2.863  | 0.004199 | +++ | 0      | 1.263 | 2 | 0.5317  |
| rs11217099 | 11 | 118809882 | A | C | -2.843 | 0.004471 | +-- | 35.5   | 6.206 | 2 | 0.04492 |
| rs17540708 | 11 | 118150127 | G | T | 2.836  | 0.004562 | +?+ | 0      | 0.798 | 1 | 0.3716  |
| rs7940062  | 11 | 72037226  | C | A | 2.834  | 0.004603 | +++ | 0      | 1.297 | 2 | 0.5229  |
| rs7483509  | 11 | 118740180 | A | G | 2.821  | 0.004784 | +++ | -73.4  | 2.307 | 2 | 0.3155  |
| rs34250455 | 11 | 118157681 | T | C | 2.821  | 0.004788 | +?+ | 0      | 0.826 | 1 | 0.3633  |
| rs35235858 | 11 | 118157250 | T | C | 2.821  | 0.004788 | +?+ | 0      | 0.826 | 1 | 0.3633  |
| rs34022886 | 11 | 118155804 | A | G | 2.818  | 0.004831 | +?+ | 0      | 0.832 | 1 | 0.3618  |
| rs12798115 | 11 | 118156517 | C | G | 2.814  | 0.004887 | +?+ | 0      | 0.838 | 1 | 0.3599  |
| rs2298821  | 11 | 118185140 | C | T | 2.81   | 0.004953 | +?+ | 0      | 0.816 | 1 | 0.3663  |
| rs622722   | 11 | 118711790 | A | G | 2.808  | 0.004981 | +++ | -13.6  | 3.523 | 2 | 0.1718  |
| rs61900905 | 11 | 118185492 | C | T | 2.805  | 0.005031 | +?+ | 0      | 0.825 | 1 | 0.3636  |
| rs11216934 | 11 | 118501459 | A | G | 2.801  | 0.005087 | +?+ | 0      | 0.136 | 1 | 0.7124  |
| rs3819250  | 11 | 118185346 | A | G | 2.788  | 0.005305 | +?+ | 0      | 0.857 | 1 | 0.3546  |
| rs7479373  | 11 | 118171285 | C | T | 2.782  | 0.005407 | +?+ | 0      | 0.974 | 1 | 0.3237  |
| rs11217090 | 11 | 118789952 | T | C | -2.773 | 0.005548 | -+- | 30.3   | 5.736 | 2 | 0.05681 |
| rs3759009  | 11 | 118173850 | A | G | 2.772  | 0.005576 | +?+ | 0      | 0.964 | 1 | 0.3263  |
| rs2231440  | 11 | 118175439 | A | G | 2.767  | 0.005661 | +?+ | 0      | 0.916 | 1 | 0.3386  |
| rs79000353 | 11 | 118420343 | A | G | -2.76  | 0.005775 | --- | -25.6  | 3.185 | 2 | 0.2034  |
| rs483598   | 11 | 118509668 | A | G | 2.759  | 0.005798 | +?+ | 0      | 0.122 | 1 | 0.7272  |
| rs2231441  | 11 | 118175540 | G | A | 2.758  | 0.005811 | +?+ | 0      | 0.983 | 1 | 0.3214  |
| rs12274090 | 11 | 72512097  | T | C | -2.754 | 0.005894 | ++- | 22.7   | 5.171 | 2 | 0.07534 |
| rs7484280  | 11 | 72167386  | A | C | 2.747  | 0.00601  | +++ | 0      | 0.145 | 2 | 0.93    |
| rs77058558 | 11 | 72065102  | A | G | 2.747  | 0.006015 | +++ | 0      | 1.09  | 2 | 0.5798  |
| rs498872   | 11 | 118477367 | A | G | -2.737 | 0.006191 | --- | 0      | 0.279 | 2 | 0.8698  |
| rs2277289  | 11 | 118182660 | C | T | 2.732  | 0.006294 | +?+ | 0      | 0.849 | 1 | 0.3567  |

|             |    |           |   |   |        |          |     |        |       |   |         |
|-------------|----|-----------|---|---|--------|----------|-----|--------|-------|---|---------|
| rs113573893 | 11 | 72078446  | G | T | 2.726  | 0.00642  | +++ | 0      | 0.971 | 2 | 0.6155  |
| rs60712691  | 11 | 72077961  | T | G | 2.726  | 0.00642  | +++ | 0      | 0.971 | 2 | 0.6155  |
| rs577396    | 11 | 118499469 | C | G | 2.725  | 0.006424 | +?+ | 0      | 0.124 | 1 | 0.725   |
| rs10431173  | 11 | 72512937  | G | A | -2.72  | 0.006538 | +-  | 20     | 4.999 | 2 | 0.08213 |
| rs73528886  | 11 | 72013848  | A | G | 2.706  | 0.006816 | +++ | 0      | 1.662 | 2 | 0.4356  |
| rs7944225   | 11 | 72496672  | C | G | -2.701 | 0.006909 | +-  | 24.4   | 5.292 | 2 | 0.07095 |
| rs73532667  | 11 | 72162726  | C | T | 2.699  | 0.006946 | +++ | 0      | 0.023 | 2 | 0.9884  |
| rs4938503   | 11 | 118180155 | C | G | 2.697  | 0.007003 | +?+ | 0      | 0.952 | 1 | 0.3291  |
| rs10160454  | 11 | 72496345  | C | A | -2.697 | 0.007005 | +-  | 24.3   | 5.285 | 2 | 0.0712  |
| rs576950    | 11 | 118391375 | G | A | -2.695 | 0.007041 | --- | 23.1   | 5.203 | 2 | 0.07415 |
| rs28423005  | 11 | 118183733 | T | C | 2.695  | 0.007043 | +?+ | -188.8 | 1.039 | 1 | 0.3081  |
| rs55930012  | 11 | 72079380  | C | T | 2.686  | 0.007232 | +++ | -71.4  | 2.334 | 2 | 0.3114  |
| rs10898873  | 11 | 72497713  | C | T | -2.684 | 0.007265 | +-  | 24     | 5.267 | 2 | 0.07184 |
| rs10898874  | 11 | 72497795  | G | A | -2.683 | 0.007294 | +-  | 24.4   | 5.293 | 2 | 0.07089 |
| rs7947423   | 11 | 72497001  | A | G | -2.681 | 0.007348 | +-  | 24     | 5.261 | 2 | 0.07204 |
| rs1126924   | 11 | 118178007 | T | C | 2.676  | 0.007451 | +?+ | -184.5 | 1.055 | 1 | 0.3044  |
| rs10898875  | 11 | 72497807  | C | T | -2.675 | 0.00748  | +-  | 24.3   | 5.281 | 2 | 0.07133 |
| rs7121919   | 11 | 72496087  | A | G | -2.657 | 0.007877 | +-  | 23.5   | 5.228 | 2 | 0.07323 |
| rs55756957  | 11 | 118747576 | G | A | -2.655 | 0.007938 | -?- | 0      | 0.377 | 1 | 0.5393  |
| rs77398170  | 11 | 118792278 | G | A | -2.644 | 0.008198 | -?- | 0      | 0.032 | 1 | 0.8577  |
| rs479490    | 11 | 72497321  | C | T | -2.641 | 0.008264 | +-  | 26.2   | 5.417 | 2 | 0.06663 |
| rs79769393  | 11 | 72080610  | A | G | 2.635  | 0.008404 | +++ | -77.6  | 2.252 | 2 | 0.3244  |
| rs12271856  | 11 | 118791532 | T | G | -2.628 | 0.008597 | -?- | 0      | 0.201 | 1 | 0.654   |
| rs12270280  | 11 | 118791150 | T | C | -2.617 | 0.008871 | -?- | 0      | 0.236 | 1 | 0.6272  |
| rs74766959  | 11 | 72065209  | G | A | 2.615  | 0.008927 | +++ | 0      | 1.752 | 2 | 0.4165  |
| rs9645708   | 11 | 72819318  | C | T | 2.614  | 0.008947 | ++  | 26.4   | 5.436 | 2 | 0.066   |
| rs74236665  | 11 | 72080895  | G | C | 2.613  | 0.008988 | +++ | -73.8  | 2.302 | 2 | 0.3164  |
| rs56229279  | 11 | 72013788  | G | A | 2.611  | 0.009039 | +++ | 5.2    | 4.221 | 2 | 0.1212  |
| rs75665552  | 11 | 72046487  | C | T | 2.602  | 0.009258 | +++ | -77.3  | 2.256 | 2 | 0.3238  |
| rs525549    | 11 | 118358068 | A | T | -2.597 | 0.009392 | --- | -6.6   | 3.753 | 2 | 0.1531  |
| rs8301      | 11 | 118895495 | G | C | -2.595 | 0.009449 | -?- | 0      | 0     | 1 | 0.9886  |
| rs79577700  | 11 | 72057385  | G | A | 2.595  | 0.009456 | +++ | -73.6  | 2.303 | 2 | 0.3161  |
| rs79549196  | 11 | 72057384  | T | C | 2.595  | 0.009462 | +++ | -73.6  | 2.304 | 2 | 0.3161  |
| rs79658353  | 11 | 72064041  | A | G | 2.59   | 0.009595 | +++ | -73.6  | 2.304 | 2 | 0.316   |
| rs687190    | 11 | 118542383 | C | T | 2.588  | 0.009641 | +++ | -58.2  | 2.529 | 2 | 0.2824  |
| rs12282752  | 11 | 118793918 | C | T | -2.575 | 0.01002  | -?- | 0      | 0.245 | 1 | 0.6208  |
| rs503425    | 11 | 118692727 | C | T | 2.574  | 0.01006  | +++ | 6.1    | 4.258 | 2 | 0.1189  |
| rs603486    | 11 | 118587347 | T | C | 2.57   | 0.01017  | +++ | 0      | 0.672 | 2 | 0.7147  |
| rs112974653 | 11 | 118807637 | T | G | -2.568 | 0.01022  | -?- | 0      | 0.019 | 1 | 0.8911  |
| rs73528892  | 11 | 72020144  | C | G | 2.565  | 0.01032  | +++ | -64.9  | 2.425 | 2 | 0.2974  |
| rs77638281  | 11 | 118811315 | A | G | -2.562 | 0.01041  | -?- | 0      | 0.026 | 1 | 0.8716  |
| rs480958    | 11 | 118577990 | G | A | 2.561  | 0.01044  | +++ | 0      | 0.645 | 2 | 0.7244  |
| rs140026975 | 11 | 118594669 | C | A | 2.56   | 0.01047  | +++ | 10.2   | 4.452 | 2 | 0.1079  |
| rs540716    | 11 | 118685015 | T | C | 2.558  | 0.01052  | +++ | 3.6    | 4.15  | 2 | 0.1256  |
| rs4938589   | 11 | 118810405 | T | C | -2.557 | 0.01057  | -?- | 0      | 0.032 | 1 | 0.8589  |
| rs7936556   | 11 | 118501299 | A | G | 2.556  | 0.0106   | +?+ | 0      | 0.141 | 1 | 0.7076  |
| rs68097885  | 11 | 118596444 | A | G | 2.554  | 0.01065  | +++ | 11.6   | 4.527 | 2 | 0.104   |
| rs7943039   | 11 | 118603030 | A | G | 2.55   | 0.01078  | +++ | 12.5   | 4.569 | 2 | 0.1018  |
| rs3132828   | 11 | 118431003 | A | G | -2.549 | 0.0108   | --- | 0      | 1.587 | 2 | 0.4522  |
| rs4938618   | 11 | 118867803 | C | G | -2.547 | 0.01086  | -?- | 0      | 0.013 | 1 | 0.9098  |
| rs4245184   | 11 | 118510562 | A | G | 2.541  | 0.01107  | +?+ | 0      | 0.115 | 1 | 0.7343  |
| rs4573680   | 11 | 118872741 | C | T | -2.54  | 0.01107  | -?- | 0      | 0.053 | 1 | 0.8187  |
| rs644273    | 11 | 118511352 | T | C | 2.539  | 0.01112  | +?+ | 0      | 0.116 | 1 | 0.7332  |
| rs11216982  | 11 | 118590864 | A | G | 2.538  | 0.01116  | +++ | 11.1   | 4.498 | 2 | 0.1055  |

|             |    |           |   |   |        |         |     |       |       |   |         |
|-------------|----|-----------|---|---|--------|---------|-----|-------|-------|---|---------|
| rs12282154  | 11 | 118807876 | A | G | -2.529 | 0.01143 | -?- | 0     | 0.01  | 1 | 0.92    |
| rs3825057   | 11 | 118622985 | C | T | 2.527  | 0.01149 | +++ | 13.3  | 4.615 | 2 | 0.09949 |
| rs11822103  | 11 | 118869539 | A | G | -2.522 | 0.01167 | -?- | 0     | 0.008 | 1 | 0.9298  |
| rs4499035   | 11 | 118610463 | T | C | 2.521  | 0.01169 | +++ | 13.3  | 4.613 | 2 | 0.0996  |
| rs11603023  | 11 | 118486067 | T | C | 2.515  | 0.01191 | +?+ | 0     | 0.177 | 1 | 0.6738  |
| rs654423    | 11 | 118511757 | A | G | 2.509  | 0.01211 | +?+ | 0     | 0.138 | 1 | 0.7106  |
| rs10892312  | 11 | 118807740 | A | G | -2.507 | 0.01216 | -?- | 0     | 0.015 | 1 | 0.9027  |
| rs4445645   | 11 | 118868750 | C | G | -2.507 | 0.01216 | -?- | 0     | 0.026 | 1 | 0.8708  |
| rs12280501  | 11 | 118801440 | T | C | -2.505 | 0.01225 | -+- | 23.2  | 5.205 | 2 | 0.07409 |
| rs4639966   | 11 | 118573519 | C | T | 2.505  | 0.01226 | +++ | -8    | 3.704 | 2 | 0.1569  |
| rs3737504   | 11 | 118869460 | G | A | -2.502 | 0.01235 | -?- | 0     | 0.017 | 1 | 0.8963  |
| rs2508922   | 11 | 118681088 | A | G | 2.5    | 0.01242 | +++ | 7.9   | 4.342 | 2 | 0.1141  |
| rs7130875   | 11 | 118613674 | C | T | 2.497  | 0.01253 | +++ | 13.8  | 4.642 | 2 | 0.09818 |
| rs10892313  | 11 | 118809329 | A | G | -2.495 | 0.01259 | -?- | 0     | 0.018 | 1 | 0.8931  |
| rs78882064  | 11 | 72084480  | A | C | 2.493  | 0.01267 | +++ | 0     | 1.814 | 2 | 0.4038  |
| rs7117408   | 11 | 118808140 | T | C | -2.488 | 0.01286 | -?- | 0     | 0.02  | 1 | 0.887   |
| rs112799932 | 11 | 118585146 | G | T | 2.486  | 0.01293 | +++ | -14.7 | 3.486 | 2 | 0.175   |
| rs7101680   | 11 | 118799206 | A | G | -2.481 | 0.01312 | -+- | 22.5  | 5.163 | 2 | 0.07566 |
| rs61563240  | 11 | 72056185  | A | G | 2.48   | 0.01313 | +++ | -42.8 | 2.801 | 2 | 0.2465  |
| rs494560    | 11 | 118521549 | A | G | 2.479  | 0.01319 | +?+ | 0     | 0.117 | 1 | 0.732   |
| rs73001486  | 11 | 118629364 | A | G | 2.478  | 0.0132  | +++ | 7.1   | 4.307 | 2 | 0.1161  |
| rs2510902   | 11 | 118700218 | A | G | 2.478  | 0.01322 | +++ | 1.5   | 4.06  | 2 | 0.1313  |
| rs112119822 | 11 | 118798824 | G | A | -2.476 | 0.01327 | -+- | 22.4  | 5.154 | 2 | 0.07602 |
| rs11235612  | 11 | 72613273  | G | A | 2.475  | 0.01334 | -++ | 37.2  | 6.373 | 2 | 0.04132 |
| rs7952074   | 11 | 72062978  | G | A | 2.472  | 0.01343 | +++ | -35.6 | 2.95  | 2 | 0.2288  |
| rs1893029   | 11 | 118610826 | T | G | 2.471  | 0.01348 | +++ | 12    | 4.545 | 2 | 0.103   |
| rs10898895  | 11 | 72741398  | A | T | 2.466  | 0.01368 | -++ | 7.4   | 4.32  | 2 | 0.1153  |
| rs11217016  | 11 | 118627149 | C | A | 2.465  | 0.01368 | +++ | 4.2   | 4.174 | 2 | 0.124   |
| rs487177    | 11 | 118657297 | G | C | 2.463  | 0.01379 | +++ | 8.9   | 4.39  | 2 | 0.1114  |
| rs75610917  | 11 | 72011276  | A | G | 2.46   | 0.01388 | +++ | 0     | 1.621 | 2 | 0.4447  |
| rs75219483  | 11 | 72008410  | T | C | 2.459  | 0.01393 | +++ | 0     | 1.62  | 2 | 0.4449  |
| rs58306819  | 11 | 72054966  | C | T | 2.451  | 0.01425 | +++ | -33.8 | 2.988 | 2 | 0.2244  |
| rs7124498   | 11 | 118616253 | A | G | 2.449  | 0.01433 | +++ | 13.7  | 4.637 | 2 | 0.09841 |
| rs6589713   | 11 | 118872404 | C | T | -2.446 | 0.01443 | -?- | 0     | 0.011 | 1 | 0.9159  |
| rs7934890   | 11 | 118655356 | T | C | 2.432  | 0.01503 | +++ | 5.7   | 4.242 | 2 | 0.1199  |
| rs57276029  | 11 | 72059859  | C | T | 2.427  | 0.0152  | +++ | -31.9 | 3.033 | 2 | 0.2195  |
| rs569770    | 11 | 118584498 | T | C | 2.426  | 0.01525 | +++ | 0     | 0.647 | 2 | 0.7238  |
| rs56104144  | 11 | 118666289 | C | G | 2.425  | 0.0153  | +++ | 17.8  | 4.865 | 2 | 0.08784 |
| rs58868870  | 11 | 118668296 | T | C | 2.412  | 0.01585 | -++ | 19    | 4.939 | 2 | 0.08463 |
| rs11217125  | 11 | 118889185 | C | T | -2.412 | 0.01586 | -?- | 0     | 0.012 | 1 | 0.9111  |
| rs74783030  | 11 | 118603615 | A | G | -2.412 | 0.01588 | -++ | 18.2  | 4.892 | 2 | 0.08665 |
| rs11217014  | 11 | 118626286 | C | T | 2.41   | 0.01597 | +++ | 7.8   | 4.34  | 2 | 0.1142  |
| rs10892282  | 11 | 118627778 | C | G | 2.405  | 0.01615 | +++ | 4.7   | 4.198 | 2 | 0.1226  |
| rs4558175   | 11 | 118872581 | A | G | -2.406 | 0.01615 | -?- | 0     | 0.099 | 1 | 0.7526  |
| rs2508204   | 11 | 72001820  | C | T | 2.401  | 0.01635 | +++ | -2.5  | 3.901 | 2 | 0.1422  |
| rs11217013  | 11 | 118624919 | C | G | 2.399  | 0.01643 | +++ | 7.9   | 4.345 | 2 | 0.1139  |
| rs12416741  | 11 | 72023828  | C | T | 2.393  | 0.0167  | +++ | -1    | 3.959 | 2 | 0.1381  |
| rs57275811  | 11 | 72127872  | G | T | 2.393  | 0.01672 | +++ | -95.9 | 2.042 | 2 | 0.3602  |
| rs4936457   | 11 | 118875727 | G | A | -2.392 | 0.01675 | -?- | 0     | 0.029 | 1 | 0.8645  |
| rs3887652   | 11 | 118856582 | C | G | -2.385 | 0.01707 | -?- | 0     | 0.009 | 1 | 0.9246  |
| rs4936458   | 11 | 118875761 | G | T | -2.381 | 0.01725 | -?- | 0     | 0.025 | 1 | 0.8732  |
| rs112996178 | 11 | 118609598 | T | C | 2.381  | 0.01729 | +++ | 14.7  | 4.69  | 2 | 0.09585 |
| rs73528897  | 11 | 72032681  | A | G | 2.378  | 0.01741 | +++ | -35.4 | 2.955 | 2 | 0.2282  |
| rs112910608 | 11 | 118637475 | T | C | 2.373  | 0.01766 | +++ | 7.5   | 4.327 | 2 | 0.1149  |

|             |    |           |   |   |        |         |     |       |       |   |          |
|-------------|----|-----------|---|---|--------|---------|-----|-------|-------|---|----------|
| rs57669200  | 11 | 72026863  | A | G | 2.373  | 0.01766 | +++ | 0.5   | 4.019 | 2 | 0.134    |
| rs7110526   | 11 | 118633533 | C | T | 2.368  | 0.01786 | +++ | 7.7   | 4.335 | 2 | 0.1145   |
| rs11217124  | 11 | 118889132 | G | A | -2.368 | 0.01787 | -?- | 0     | 0.013 | 1 | 0.9094   |
| rs73530754  | 11 | 72099007  | T | C | 2.363  | 0.01815 | +++ | 0     | 0.427 | 2 | 0.8077   |
| rs75184960  | 11 | 72141222  | A | C | 2.362  | 0.01818 | +++ | -96.1 | 2.039 | 2 | 0.3607   |
| rs540800    | 11 | 118565651 | A | G | 2.361  | 0.0182  | +++ | -78.8 | 2.237 | 2 | 0.3268   |
| rs34147990  | 11 | 72160112  | T | C | 2.359  | 0.01832 | +++ | 0     | 0.284 | 2 | 0.8676   |
| rs11217018  | 11 | 118635364 | C | T | 2.359  | 0.01833 | +++ | 6.6   | 4.282 | 2 | 0.1176   |
| rs7124336   | 11 | 72160271  | T | C | 2.353  | 0.01862 | +++ | 0     | 0.281 | 2 | 0.8688   |
| rs73530756  | 11 | 72101747  | T | A | 2.352  | 0.01865 | +++ | 0     | 0.428 | 2 | 0.8073   |
| rs11217021  | 11 | 118640828 | C | T | 2.352  | 0.01867 | +++ | 7.9   | 4.344 | 2 | 0.1139   |
| rs11823672  | 11 | 72160828  | G | A | 2.352  | 0.01867 | +++ | 0     | 0.182 | 2 | 0.9129   |
| rs3916582   | 11 | 118887888 | T | C | -2.35  | 0.01875 | -?- | 0     | 0.011 | 1 | 0.918    |
| rs78639187  | 11 | 72071641  | T | C | 2.347  | 0.0189  | +++ | 0     | 1.725 | 2 | 0.4222   |
| rs11600378  | 11 | 118803842 | G | A | -2.343 | 0.01912 | -?- | 0     | 0.023 | 1 | 0.8792   |
| rs117235696 | 11 | 118803193 | G | T | -2.343 | 0.01913 | -?- | 0     | 0.023 | 1 | 0.8793   |
| rs10892320  | 11 | 118873385 | T | C | -2.342 | 0.0192  | -?- | 0     | 0.063 | 1 | 0.8015   |
| rs11605265  | 11 | 118805144 | A | G | -2.342 | 0.0192  | -?- | 0     | 0.023 | 1 | 0.8803   |
| rs571470    | 11 | 118697012 | A | G | -2.338 | 0.01937 | --- | 27    | 5.476 | 2 | 0.0647   |
| rs506234    | 11 | 118540104 | G | C | 2.329  | 0.01983 | +++ | -86.5 | 2.145 | 2 | 0.3422   |
| rs59755180  | 11 | 72073763  | C | G | 2.328  | 0.01993 | +++ | -42   | 2.817 | 2 | 0.2445   |
| rs58753751  | 11 | 72048813  | C | T | 2.328  | 0.01994 | +++ | -58.1 | 2.531 | 2 | 0.2821   |
| rs143711539 | 11 | 118804671 | A | G | -2.326 | 0.02001 | -?- | 0     | 0.018 | 1 | 0.8926   |
| rs527619    | 11 | 118563286 | A | G | 2.326  | 0.02002 | +++ | -82.9 | 2.187 | 2 | 0.3351   |
| rs11605658  | 11 | 118805220 | T | C | -2.323 | 0.02018 | -?- | 0     | 0.017 | 1 | 0.8951   |
| rs57291879  | 11 | 72041441  | A | C | 2.322  | 0.02023 | +++ | -57.5 | 2.54  | 2 | 0.2808   |
| rs2508573   | 11 | 118555383 | T | C | 2.32   | 0.02037 | +++ | -77.9 | 2.248 | 2 | 0.325    |
| rs7105187   | 11 | 118887581 | T | C | -2.312 | 0.02079 | -?- | 0     | 0.02  | 1 | 0.8878   |
| rs4291686   | 11 | 118700557 | G | A | 2.311  | 0.02083 | +++ | -15.9 | 3.45  | 2 | 0.1781   |
| rs77916839  | 11 | 118798780 | C | G | -2.308 | 0.02102 | -?- | 0     | 0.048 | 1 | 0.8263   |
| rs60849224  | 11 | 72042930  | C | T | 2.305  | 0.02114 | +++ | -55.7 | 2.57  | 2 | 0.2767   |
| rs36049191  | 11 | 72040784  | C | T | 2.305  | 0.02115 | +++ | -55.6 | 2.57  | 2 | 0.2767   |
| rs2303969   | 11 | 72536272  | A | G | 2.297  | 0.02162 | +++ | 35.7  | 6.219 | 2 | 0.04462  |
| rs625274    | 11 | 118699276 | T | C | 2.296  | 0.02166 | +++ | -20.1 | 3.33  | 2 | 0.1892   |
| rs59608621  | 11 | 118885163 | G | A | -2.29  | 0.02205 | -?- | 0     | 0.022 | 1 | 0.8826   |
| rs4936459   | 11 | 118899218 | T | C | -2.287 | 0.0222  | -+- | -1.2  | 3.955 | 2 | 0.1384   |
| rs7131534   | 11 | 118886656 | A | G | -2.286 | 0.02223 | -?- | 0     | 0.022 | 1 | 0.8829   |
| rs11825284  | 11 | 118880012 | A | G | -2.283 | 0.02244 | -?- | 0     | 0.01  | 1 | 0.9195   |
| rs492471    | 11 | 118689745 | T | C | 2.282  | 0.02251 | +++ | 0     | 0.704 | 2 | 0.7034   |
| rs77293887  | 11 | 72118937  | T | C | 2.277  | 0.0228  | +++ | 0     | 1.775 | 2 | 0.4116   |
| rs10892310  | 11 | 118806897 | T | C | 2.276  | 0.02285 | ++  | 57.9  | 9.511 | 2 | 0.008604 |
| rs11216855  | 11 | 118208750 | C | T | -2.275 | 0.02292 | -?- | 0     | 0.455 | 1 | 0.5      |
| rs58601794  | 11 | 118884726 | C | T | -2.271 | 0.02313 | -?- | 0     | 0.025 | 1 | 0.8731   |
| rs472837    | 11 | 72007150  | T | C | 2.269  | 0.02326 | +++ | -4    | 3.846 | 2 | 0.1462   |
| rs73559119  | 11 | 118879824 | C | T | -2.268 | 0.02335 | -?- | 0     | 0.007 | 1 | 0.9316   |
| rs7120445   | 11 | 118879285 | C | A | -2.265 | 0.02348 | -?- | 0     | 0.005 | 1 | 0.9421   |
| rs590732    | 11 | 72006394  | T | C | 2.265  | 0.02352 | +++ | -3.7  | 3.859 | 2 | 0.1452   |
| rs58709307  | 11 | 118877563 | T | C | -2.264 | 0.02359 | -?- | 0     | 0.007 | 1 | 0.9319   |
| rs7113753   | 11 | 118889378 | A | G | -2.264 | 0.02359 | -?- | 0     | 0.001 | 1 | 0.9717   |
| rs55772432  | 11 | 118805385 | A | G | 2.26   | 0.02383 | +?+ | 1.9   | 3.058 | 1 | 0.08034  |
| rs61381062  | 11 | 118884708 | A | G | -2.259 | 0.02385 | -?- | 0     | 0.029 | 1 | 0.8639   |
| rs11607569  | 11 | 118880668 | C | T | -2.25  | 0.02447 | -?- | 0     | 0.009 | 1 | 0.9243   |
| rs11820805  | 11 | 118888831 | C | T | -2.249 | 0.02449 | -?- | 0     | 0.037 | 1 | 0.8483   |
| rs60081894  | 11 | 72108715  | C | A | 2.248  | 0.02458 | +++ | 0     | 0.397 | 2 | 0.82     |

|             |    |           |   |   |        |         |     |       |       |   |         |
|-------------|----|-----------|---|---|--------|---------|-----|-------|-------|---|---------|
| rs59095933  | 11 | 118885161 | A | G | -2.247 | 0.02466 | -?- | 0     | 0.024 | 1 | 0.8756  |
| rs10751216  | 11 | 72526123  | T | C | -2.245 | 0.02479 | --- | 0     | 0.245 | 2 | 0.8847  |
| rs7947185   | 11 | 118214726 | C | T | -2.241 | 0.02502 | --- | 0     | 1.31  | 2 | 0.5193  |
| rs78488993  | 11 | 72882539  | C | G | 2.236  | 0.02533 | +++ | 0     | 1.117 | 2 | 0.5722  |
| rs1784257   | 11 | 72007984  | C | T | 2.229  | 0.02583 | +++ | -0.7  | 3.974 | 2 | 0.1371  |
| rs35668754  | 11 | 72523110  | C | T | -2.228 | 0.02585 | --- | 0     | 0.217 | 2 | 0.8971  |
| rs6592490   | 11 | 72519756  | C | A | -2.228 | 0.02586 | --- | 0     | 0.235 | 2 | 0.889   |
| rs35343925  | 11 | 72523349  | T | A | -2.228 | 0.02587 | --- | 0     | 0.229 | 2 | 0.8917  |
| rs613791    | 11 | 118764051 | T | C | 2.227  | 0.02592 | +?+ | 0     | 0.076 | 1 | 0.7827  |
| rs35752694  | 11 | 72522881  | A | G | -2.22  | 0.02643 | --- | 0     | 0.218 | 2 | 0.8967  |
| rs11606357  | 11 | 118878222 | C | T | -2.218 | 0.02657 | -?- | 0     | 0.003 | 1 | 0.956   |
| rs1975109   | 11 | 72519217  | G | C | -2.216 | 0.02669 | --- | 0     | 0.219 | 2 | 0.8964  |
| rs10898880  | 11 | 72525111  | A | C | -2.213 | 0.02693 | --- | 0     | 0.246 | 2 | 0.8841  |
| rs10501410  | 11 | 72088806  | A | G | 2.208  | 0.02721 | +++ | 0     | 0.157 | 2 | 0.9247  |
| rs4944805   | 11 | 72522262  | G | T | -2.206 | 0.02735 | --- | 0     | 0.229 | 2 | 0.8919  |
| rs7110719   | 11 | 72521286  | C | T | -2.205 | 0.02746 | --- | 0     | 0.231 | 2 | 0.8909  |
| rs12294037  | 11 | 72807631  | T | A | -2.201 | 0.02771 | --- | -38.2 | 2.894 | 2 | 0.2353  |
| rs10751215  | 11 | 72526087  | C | T | -2.185 | 0.02892 | --- | 0     | 0.212 | 2 | 0.8994  |
| rs7952617   | 11 | 72516946  | C | T | -2.181 | 0.02918 | --- | 0     | 0.324 | 2 | 0.8506  |
| rs11602764  | 11 | 118888619 | G | A | -2.18  | 0.02929 | -?- | 0     | 0.027 | 1 | 0.8701  |
| rs11235596  | 11 | 72514163  | G | A | -2.171 | 0.02995 | --- | 0     | 0.192 | 2 | 0.9087  |
| rs111322300 | 11 | 118893878 | C | T | -2.164 | 0.03043 | --- | 0     | 1.231 | 2 | 0.5405  |
| rs3176912   | 11 | 118757788 | A | G | -2.163 | 0.03051 | -?- | 0     | 0.5   | 1 | 0.4795  |
| rs57928845  | 11 | 72149909  | T | C | 2.162  | 0.03059 | +++ | 0     | 0.732 | 2 | 0.6933  |
| rs9645664   | 11 | 118873987 | C | T | -2.162 | 0.03064 | --- | 0     | 1.311 | 2 | 0.5191  |
| rs60024067  | 11 | 72028610  | C | T | 2.158  | 0.03093 | +++ | 3.7   | 4.154 | 2 | 0.1253  |
| rs60065241  | 11 | 118883491 | A | C | -2.148 | 0.03172 | -?- | 0     | 0.03  | 1 | 0.8618  |
| rs11217122  | 11 | 118880740 | C | T | -2.147 | 0.03178 | -?- | 0     | 0.025 | 1 | 0.875   |
| rs10793057  | 11 | 72968660  | A | G | 2.147  | 0.03181 | +++ | 0     | 0.192 | 2 | 0.9086  |
| rs12280288  | 11 | 118892940 | C | T | -2.143 | 0.03213 | -?- | 0     | 0.001 | 1 | 0.9795  |
| rs10111     | 11 | 118886117 | T | C | -2.141 | 0.0323  | -?- | 0     | 0.032 | 1 | 0.8587  |
| rs6592510   | 11 | 72788823  | C | T | -2.139 | 0.03242 | ++  | -31.1 | 3.05  | 2 | 0.2176  |
| rs2276071   | 11 | 118896116 | C | A | -2.137 | 0.03258 | --- | 0     | 1.187 | 2 | 0.5524  |
| rs57879605  | 11 | 118798757 | T | C | -2.137 | 0.03261 | --- | 0     | 1.867 | 2 | 0.3931  |
| rs12294466  | 11 | 118789657 | T | C | -2.123 | 0.03372 | -+- | -3.3  | 3.873 | 2 | 0.1442  |
| rs143660533 | 11 | 118892759 | C | A | -2.117 | 0.03422 | --- | 0     | 1.178 | 2 | 0.5549  |
| rs117289748 | 11 | 118892757 | G | C | -2.116 | 0.03435 | --- | 0     | 1.175 | 2 | 0.5557  |
| rs1783584   | 11 | 72889137  | C | T | -2.112 | 0.03465 | --- | 0     | 0.197 | 2 | 0.9063  |
| rs61730467  | 11 | 118772160 | A | G | -2.105 | 0.03533 | -?- | 0     | 0.002 | 1 | 0.9613  |
| rs7926282   | 11 | 118605914 | C | A | 2.101  | 0.03563 | ++  | 52.6  | 8.441 | 2 | 0.01469 |
| rs2276072   | 11 | 118896115 | G | A | -2.1   | 0.03577 | --- | 0     | 1.131 | 2 | 0.568   |
| rs598207    | 11 | 118765267 | C | G | 2.1    | 0.03577 | +?+ | 0     | 0.221 | 1 | 0.6384  |
| rs10898877  | 11 | 72511021  | G | A | -2.099 | 0.03586 | --- | 0     | 0.142 | 2 | 0.9316  |
| rs10751213  | 11 | 72510644  | A | C | -2.094 | 0.03626 | --- | 0     | 0.137 | 2 | 0.9339  |
| rs6592489   | 11 | 72510180  | C | G | -2.093 | 0.0363  | --- | 0     | 0.136 | 2 | 0.9341  |
| rs75067211  | 11 | 118854372 | T | C | -2.093 | 0.03639 | -?- | 0     | 0.142 | 1 | 0.7064  |
| rs1784300   | 11 | 118679629 | T | A | 2.09   | 0.0366  | ++  | -3.2  | 3.877 | 2 | 0.1439  |
| rs1000620   | 11 | 72509713  | A | G | -2.089 | 0.03667 | --- | 0     | 0.132 | 2 | 0.9361  |
| rs4459332   | 11 | 72508267  | C | T | -2.087 | 0.03689 | --- | 0     | 0.132 | 2 | 0.9359  |
| rs677231    | 11 | 72504848  | A | T | -2.083 | 0.03723 | --- | 0     | 0.129 | 2 | 0.9377  |
| rs138922408 | 11 | 118356711 | T | C | -2.082 | 0.03733 | --- | 16.4  | 4.782 | 2 | 0.09154 |
| rs4944800   | 11 | 72506130  | C | T | -2.082 | 0.03737 | --- | 0     | 0.127 | 2 | 0.9385  |
| rs555649    | 11 | 118651809 | C | T | 2.08   | 0.03749 | ++  | -25   | 3.201 | 2 | 0.2018  |
| rs7925155   | 11 | 72732430  | C | G | -2.076 | 0.03793 | ++  | -33.5 | 2.997 | 2 | 0.2235  |

|             |    |           |   |   |        |         |     |       |        |   |          |
|-------------|----|-----------|---|---|--------|---------|-----|-------|--------|---|----------|
| rs607472    | 11 | 118680072 | G | C | 2.075  | 0.03795 | ++- | 2.1   | 4.084  | 2 | 0.1298   |
| rs947931    | 11 | 118577614 | G | T | -2.073 | 0.03817 | --- | -56.9 | 2.55   | 2 | 0.2794   |
| rs4459331   | 11 | 72507938  | C | T | -2.069 | 0.03858 | --- | 0     | 0.149  | 2 | 0.9282   |
| rs7127427   | 11 | 118805138 | A | G | -2.066 | 0.03884 | -?- | 0     | 0.22   | 1 | 0.6389   |
| rs75210328  | 11 | 118801296 | T | G | -2.063 | 0.03909 | -?- | 0     | 0.223  | 1 | 0.637    |
| rs2510897   | 11 | 118644582 | C | A | 2.062  | 0.03918 | ++- | -25.8 | 3.181  | 2 | 0.2039   |
| rs2186780   | 11 | 118605451 | T | C | 2.058  | 0.03958 | ++  | 49.8  | 7.966  | 2 | 0.01863  |
| rs12796102  | 11 | 118662028 | T | C | 2.056  | 0.03976 | ++  | -21.5 | 3.293  | 2 | 0.1927   |
| rs546393    | 11 | 118624250 | C | T | 2.054  | 0.03994 | ++  | -11.4 | 3.59   | 2 | 0.1661   |
| rs7127188   | 11 | 118893023 | C | A | -2.049 | 0.04045 | --- | 0     | 1.092  | 2 | 0.5794   |
| rs2105782   | 11 | 118659896 | C | T | 2.048  | 0.04055 | ++  | -22.4 | 3.269  | 2 | 0.195    |
| rs61179449  | 11 | 118892835 | C | G | -2.046 | 0.04076 | --- | 0     | 1.084  | 2 | 0.5817   |
| rs10431171  | 11 | 72512271  | C | G | -2.045 | 0.04085 | --- | 0     | 0.258  | 2 | 0.8789   |
| rs581045    | 11 | 118632522 | T | C | 2.045  | 0.0409  | ++- | -17.4 | 3.406  | 2 | 0.1821   |
| rs58955701  | 11 | 118892872 | T | C | -2.045 | 0.0409  | --- | 0     | 1.081  | 2 | 0.5825   |
| rs10431172  | 11 | 72512630  | T | C | -2.042 | 0.04115 | --- | 0     | 0.254  | 2 | 0.8808   |
| rs4944802   | 11 | 72510476  | G | A | -2.041 | 0.04129 | --- | 0     | 0.223  | 2 | 0.8947   |
| rs4938621   | 11 | 118892277 | T | C | -2.039 | 0.04148 | --- | 0     | 1.07   | 2 | 0.5857   |
| rs488219    | 11 | 118620697 | C | T | 2.037  | 0.04166 | ++- | -12.9 | 3.542  | 2 | 0.1702   |
| rs7929825   | 11 | 118788081 | G | C | -2.035 | 0.04189 | --- | 0     | 1.35   | 2 | 0.509    |
| rs76068633  | 11 | 118416268 | T | C | -2.032 | 0.04211 | --- | 27.9  | 5.551  | 2 | 0.06232  |
| rs555639    | 11 | 118629031 | A | G | 2.029  | 0.04244 | ++  | -18.4 | 3.378  | 2 | 0.1847   |
| rs150792202 | 11 | 118652569 | A | G | 2.029  | 0.04249 | +?+ | -20.4 | 2.492  | 1 | 0.1144   |
| rs73530785  | 11 | 72152606  | G | A | 2.021  | 0.04333 | +++ | 0     | 0.495  | 2 | 0.7807   |
| rs116976310 | 11 | 118420099 | C | A | -2.013 | 0.04414 | --- | 12.8  | 4.586  | 2 | 0.101    |
| rs6592486   | 11 | 72508609  | A | G | -2.011 | 0.04434 | --- | 0     | 0.189  | 2 | 0.9098   |
| rs515523    | 11 | 118658075 | G | A | 2.003  | 0.0452  | ++- | -12.2 | 3.564  | 2 | 0.1683   |
| rs11006     | 11 | 118895202 | G | A | -2.002 | 0.04525 | --- | 0     | 0.995  | 2 | 0.608    |
| rs74891547  | 11 | 118811878 | C | G | -2.002 | 0.04533 | -?- | 0     | 0.133  | 1 | 0.7156   |
| rs607125    | 11 | 118617299 | C | T | 1.997  | 0.04579 | ++- | -14.2 | 3.502  | 2 | 0.1736   |
| rs1864653   | 11 | 72503293  | A | G | -1.992 | 0.04641 | --- | 0     | 0.172  | 2 | 0.9176   |
| rs11235594  | 11 | 72503735  | G | A | -1.991 | 0.04649 | --- | 0     | 0.166  | 2 | 0.9203   |
| rs1784543   | 11 | 118631653 | T | A | 1.987  | 0.0469  | ++- | -16   | 3.449  | 2 | 0.1782   |
| rs11235592  | 11 | 72501277  | C | G | -1.987 | 0.04693 | --- | 0     | 0.154  | 2 | 0.9258   |
| rs507890    | 11 | 118631288 | C | T | 1.979  | 0.04784 | ++  | -18   | 3.39   | 2 | 0.1836   |
| rs485099    | 11 | 72500060  | C | T | -1.97  | 0.04881 | --- | 0     | 0.151  | 2 | 0.9271   |
| rs10892234  | 11 | 118194571 | G | A | -1.969 | 0.04893 | --- | 0     | 1.48   | 2 | 0.4771   |
| rs3862794   | 11 | 72538600  | C | T | -1.964 | 0.04954 | ++  | -1.3  | 3.948  | 2 | 0.1389   |
| rs4944797   | 11 | 72500072  | T | G | -1.963 | 0.04965 | --- | 0     | 0.173  | 2 | 0.9173   |
| rs57464210  | 11 | 72043183  | G | T | 1.961  | 0.04989 | +++ | -1.2  | 3.952  | 2 | 0.1386   |
| rs4944796   | 11 | 72499000  | C | A | -1.959 | 0.0501  | --- | 0     | 0.166  | 2 | 0.9204   |
| rs4394861   | 11 | 72800970  | C | T | -1.955 | 0.05064 | ++  | -28.1 | 3.123  | 2 | 0.2098   |
| rs79108568  | 11 | 118775524 | G | T | -1.953 | 0.05085 | -?- | 0     | 0.001  | 1 | 0.9696   |
| rs2187557   | 11 | 118148271 | T | C | -1.944 | 0.05194 | -?- | 0     | 0.023  | 1 | 0.8789   |
| rs58682117  | 11 | 72531000  | C | T | -1.931 | 0.05354 | --- | 64.2  | 11.173 | 2 | 0.003748 |
| rs11216904  | 11 | 118440863 | G | A | 1.908  | 0.05645 | +++ | 0     | 0.488  | 2 | 0.7833   |
| rs12224844  | 11 | 118439048 | T | A | 1.896  | 0.05802 | +++ | 0     | 0.419  | 2 | 0.811    |
| rs10892243  | 11 | 118441846 | C | T | 1.889  | 0.05895 | +++ | 0     | 0.456  | 2 | 0.7962   |
| rs60837962  | 11 | 118438448 | T | A | 1.888  | 0.05899 | +++ | 0     | 0.538  | 2 | 0.7641   |
| rs10736492  | 11 | 118459269 | G | A | 1.887  | 0.05922 | +++ | 0     | 0.5    | 2 | 0.7787   |
| rs569       | 11 | 118894287 | G | A | -1.883 | 0.05972 | --- | 0     | 0.854  | 2 | 0.6525   |
| rs61506726  | 11 | 118831335 | G | A | -1.878 | 0.06038 | --- | 0     | 1.078  | 2 | 0.5832   |
| rs11216898  | 11 | 118432852 | C | T | 1.865  | 0.06218 | +++ | 0     | 0.672  | 2 | 0.7147   |
| rs60067274  | 11 | 118412296 | T | A | 1.855  | 0.06361 | +++ | 0     | 0.465  | 2 | 0.7927   |

|             |    |           |   |   |        |         |     |       |       |   |         |
|-------------|----|-----------|---|---|--------|---------|-----|-------|-------|---|---------|
| rs76160025  | 11 | 118782802 | T | C | -1.851 | 0.06413 | -?- | 0     | 0.271 | 1 | 0.6029  |
| rs11216897  | 11 | 118432279 | G | A | 1.851  | 0.06414 | +++ | 0     | 0.526 | 2 | 0.7687  |
| rs3741319   | 11 | 118415848 | C | A | 1.851  | 0.06424 | +++ | 0     | 0.419 | 2 | 0.8112  |
| rs11216889  | 11 | 118421512 | A | G | 1.847  | 0.06479 | +++ | 0     | 0.483 | 2 | 0.7853  |
| rs11216900  | 11 | 118436079 | C | G | 1.845  | 0.06507 | +++ | 0     | 0.632 | 2 | 0.7292  |
| rs4326835   | 11 | 118432404 | T | G | 1.844  | 0.06515 | +++ | 0     | 0.605 | 2 | 0.7391  |
| rs59108310  | 11 | 118433729 | G | A | 1.842  | 0.06542 | +++ | 0     | 0.496 | 2 | 0.7805  |
| rs566733    | 11 | 118608625 | G | C | 1.842  | 0.06551 | ++- | -29.8 | 3.082 | 2 | 0.2142  |
| rs3825055   | 11 | 118416073 | C | A | 1.841  | 0.06565 | +++ | 0     | 0.424 | 2 | 0.8091  |
| rs3741320   | 11 | 118415847 | C | G | 1.839  | 0.06593 | +++ | 0     | 0.411 | 2 | 0.8141  |
| rs11216899  | 11 | 118434421 | G | A | 1.835  | 0.06651 | +++ | 0     | 0.599 | 2 | 0.7413  |
| rs11216902  | 11 | 118437279 | G | A | 1.833  | 0.06682 | +++ | 0     | 0.483 | 2 | 0.7854  |
| rs11216890  | 11 | 118421569 | G | C | 1.83   | 0.06726 | +++ | 0     | 0.478 | 2 | 0.7876  |
| rs60753148  | 11 | 118434835 | T | C | 1.827  | 0.06769 | +++ | 0     | 0.584 | 2 | 0.7467  |
| rs11600585  | 11 | 72727840  | G | A | 1.825  | 0.06806 | -++ | 39.6  | 6.618 | 2 | 0.03655 |
| rs2277293   | 11 | 118422868 | T | C | 1.824  | 0.06816 | +++ | 0     | 0.449 | 2 | 0.7988  |
| rs2277291   | 11 | 118435756 | T | C | 1.819  | 0.06892 | +++ | 0     | 0.568 | 2 | 0.7526  |
| rs11216891  | 11 | 118422234 | T | A | 1.818  | 0.06902 | +++ | 0     | 0.468 | 2 | 0.7915  |
| rs73022058  | 11 | 118423672 | T | C | 1.818  | 0.06906 | +++ | 0     | 0.467 | 2 | 0.7918  |
| rs2277295   | 11 | 118416253 | T | C | 1.817  | 0.06929 | +++ | 0     | 0.585 | 2 | 0.7462  |
| rs11217004  | 11 | 118607622 | A | G | 1.812  | 0.06998 | ++- | -26.6 | 3.16  | 2 | 0.2059  |
| rs567680    | 11 | 118608532 | G | C | 1.81   | 0.07029 | ++- | -23.1 | 3.25  | 2 | 0.1969  |
| rs4456287   | 11 | 118298252 | C | T | 1.803  | 0.07132 | +++ | 0     | 0.627 | 2 | 0.731   |
| rs187547749 | 11 | 118439159 | T | C | -1.803 | 0.07146 | --- | 3.9   | 4.162 | 2 | 0.1248  |
| rs113739713 | 11 | 118420101 | G | A | 1.801  | 0.07167 | +++ | 0     | 0.428 | 2 | 0.8074  |
| rs12274926  | 11 | 118295117 | C | T | 1.8    | 0.07192 | +++ | 0     | 0.566 | 2 | 0.7534  |
| rs632124    | 11 | 118613235 | A | T | 1.799  | 0.07205 | ++- | -23.1 | 3.249 | 2 | 0.197   |
| rs10892245  | 11 | 118472354 | A | C | 1.798  | 0.07223 | +++ | 0     | 0.441 | 2 | 0.8022  |
| rs7929887   | 11 | 118428791 | G | A | 1.797  | 0.07232 | +++ | 0     | 0.389 | 2 | 0.8231  |
| rs2511062   | 11 | 72871055  | C | T | -1.795 | 0.0726  | +-- | -25.8 | 3.179 | 2 | 0.204   |
| rs74384601  | 11 | 118449313 | G | A | -1.793 | 0.07304 | --- | -4.7  | 3.819 | 2 | 0.1481  |
| rs12788933  | 11 | 118140184 | T | C | 1.792  | 0.07319 | +?+ | -35.7 | 2.21  | 1 | 0.1371  |
| rs7109082   | 11 | 72707441  | C | A | 1.789  | 0.07355 | -++ | 37.3  | 6.38  | 2 | 0.04118 |
| rs188843024 | 11 | 118453478 | A | G | -1.789 | 0.07356 | --- | -32.6 | 3.016 | 2 | 0.2214  |
| rs12797009  | 11 | 118826192 | A | C | 1.786  | 0.07413 | +?+ | 0     | 0.314 | 1 | 0.5751  |
| rs11216925  | 11 | 118471423 | C | T | 1.78   | 0.07502 | +++ | 0     | 0.444 | 2 | 0.8008  |
| rs187678279 | 11 | 118338067 | A | G | -1.777 | 0.07557 | --- | 22.2  | 5.138 | 2 | 0.07661 |
| rs56403966  | 11 | 118425051 | A | G | 1.774  | 0.07601 | +++ | 0     | 0.446 | 2 | 0.8     |
| rs11216926  | 11 | 118471996 | T | C | 1.772  | 0.07639 | +++ | 0     | 0.472 | 2 | 0.7898  |
| rs58270621  | 11 | 118413604 | A | G | 1.772  | 0.0764  | +++ | 0     | 0.449 | 2 | 0.7989  |
| rs141108621 | 11 | 118349211 | T | C | -1.771 | 0.07658 | --- | 13.9  | 4.648 | 2 | 0.09787 |
| rs11216909  | 11 | 118449746 | T | C | 1.769  | 0.07685 | +++ | 0     | 0.424 | 2 | 0.8088  |
| rs11216892  | 11 | 118424008 | T | C | 1.769  | 0.07694 | +++ | 0     | 0.383 | 2 | 0.8259  |
| rs55857590  | 11 | 118425063 | G | A | 1.768  | 0.07707 | +++ | 0     | 0.396 | 2 | 0.8205  |
| rs17742     | 11 | 118473385 | C | T | 1.766  | 0.07735 | +++ | 0     | 0.419 | 2 | 0.8108  |
| rs11216886  | 11 | 118411424 | C | A | 1.764  | 0.07768 | +++ | 0     | 0.505 | 2 | 0.7768  |
| rs7932700   | 11 | 118411713 | T | G | 1.764  | 0.07773 | +++ | 0     | 0.492 | 2 | 0.7817  |
| rs4338560   | 11 | 118143368 | T | C | 1.762  | 0.07805 | +?+ | -30.5 | 2.299 | 1 | 0.1294  |
| rs57156480  | 11 | 118896959 | A | G | -1.761 | 0.0782  | --- | 0     | 0.766 | 2 | 0.6819  |
| rs11216896  | 11 | 118430048 | T | C | 1.76   | 0.07833 | +++ | 0     | 0.394 | 2 | 0.8212  |
| rs3782042   | 11 | 118185919 | A | G | -1.757 | 0.07898 | -?- | -25.5 | 2.391 | 1 | 0.1221  |
| rs11552421  | 11 | 118430519 | T | C | 1.755  | 0.07925 | +++ | 0     | 0.358 | 2 | 0.8361  |
| rs1047079   | 11 | 118473231 | C | T | 1.746  | 0.08085 | +++ | 0     | 0.503 | 2 | 0.7777  |
| rs574387    | 11 | 118337003 | C | A | 1.745  | 0.08099 | +++ | 0     | 0.265 | 2 | 0.876   |

|             |    |           |   |   |        |         |     |   |       |   |        |
|-------------|----|-----------|---|---|--------|---------|-----|---|-------|---|--------|
| rs3741325   | 11 | 118405989 | G | A | 1.743  | 0.08127 | +++ | 0 | 0.508 | 2 | 0.7757 |
| rs11216881  | 11 | 118409539 | G | A | 1.743  | 0.08133 | +++ | 0 | 0.455 | 2 | 0.7966 |
| rs45505501  | 11 | 118405305 | A | G | 1.742  | 0.08148 | +++ | 0 | 0.444 | 2 | 0.8008 |
| rs113054880 | 11 | 118459702 | G | C | 1.742  | 0.08158 | +++ | 0 | 0.502 | 2 | 0.7781 |
| rs11216907  | 11 | 118444525 | A | G | 1.735  | 0.08282 | +++ | 0 | 0.53  | 2 | 0.7672 |
| rs11216880  | 11 | 118409536 | A | G | 1.733  | 0.08304 | +++ | 0 | 0.452 | 2 | 0.7976 |
| rs73022038  | 11 | 118408471 | T | C | 1.732  | 0.08321 | +++ | 0 | 0.448 | 2 | 0.7993 |
| rs57438673  | 11 | 118459039 | A | G | 1.732  | 0.08329 | +++ | 0 | 0.501 | 2 | 0.7782 |
| rs11216883  | 11 | 118410468 | G | A | 1.732  | 0.08335 | +++ | 0 | 0.454 | 2 | 0.797  |
| rs11216906  | 11 | 118443944 | A | G | 1.731  | 0.08344 | +++ | 0 | 0.426 | 2 | 0.8082 |
| rs11216921  | 11 | 118464815 | C | G | 1.731  | 0.08345 | +++ | 0 | 0.466 | 2 | 0.7922 |
| rs7930148   | 11 | 118435966 | A | G | 1.73   | 0.08354 | +++ | 0 | 0.333 | 2 | 0.8466 |
| rs17122269  | 11 | 118445275 | C | T | 1.729  | 0.08382 | +++ | 0 | 0.526 | 2 | 0.7687 |
| rs2277292   | 11 | 118425419 | T | G | 1.728  | 0.08402 | +++ | 0 | 0.373 | 2 | 0.8299 |
| rs11216924  | 11 | 118470092 | G | C | 1.728  | 0.08405 | +++ | 0 | 0.526 | 2 | 0.7687 |
| rs11216912  | 11 | 118452334 | C | G | 1.728  | 0.08406 | +++ | 0 | 0.431 | 2 | 0.8061 |
| rs73022041  | 11 | 118408789 | C | T | 1.727  | 0.08412 | +++ | 0 | 0.45  | 2 | 0.7987 |
| rs73023350  | 11 | 118449396 | A | G | 1.727  | 0.08422 | +++ | 0 | 0.43  | 2 | 0.8067 |
| rs11216885  | 11 | 118410545 | G | A | 1.726  | 0.08426 | +++ | 0 | 0.444 | 2 | 0.8009 |
| rs10898881  | 11 | 72527018  | A | G | 1.726  | 0.08427 | +++ | 0 | 1.007 | 2 | 0.6043 |
| rs9736327   | 11 | 118447580 | G | T | 1.726  | 0.0843  | +++ | 0 | 0.429 | 2 | 0.807  |
| rs11216917  | 11 | 118462160 | G | T | 1.726  | 0.08431 | +++ | 0 | 0.365 | 2 | 0.8332 |
| rs7126175   | 11 | 118450875 | T | C | 1.726  | 0.08438 | +++ | 0 | 0.428 | 2 | 0.8074 |
| rs45485302  | 11 | 118405377 | A | C | 1.725  | 0.08451 | +++ | 0 | 0.415 | 2 | 0.8128 |
| rs9735421   | 11 | 118447597 | A | G | 1.724  | 0.08466 | +++ | 0 | 0.425 | 2 | 0.8085 |
| rs17092756  | 11 | 118457630 | C | G | 1.723  | 0.08497 | +++ | 0 | 0.421 | 2 | 0.8101 |
| rs11216884  | 11 | 118410488 | C | T | 1.722  | 0.08499 | +++ | 0 | 0.451 | 2 | 0.798  |
| rs45474901  | 11 | 118405453 | C | T | 1.722  | 0.08508 | +++ | 0 | 0.564 | 2 | 0.7542 |
| rs11216911  | 11 | 118451901 | C | T | 1.72   | 0.08535 | +++ | 0 | 0.419 | 2 | 0.8112 |
| rs11216923  | 11 | 118465501 | G | A | 1.72   | 0.08549 | +++ | 0 | 0.392 | 2 | 0.8221 |
| rs7131631   | 11 | 118409374 | A | G | 1.719  | 0.08552 | +++ | 0 | 0.444 | 2 | 0.8008 |
| rs45444192  | 11 | 118208083 | A | G | 1.719  | 0.0856  | +?+ | 0 | 0.144 | 1 | 0.7042 |
| rs9735449   | 11 | 118448087 | T | C | 1.719  | 0.08562 | +++ | 0 | 0.488 | 2 | 0.7835 |
| rs7128587   | 11 | 118409302 | A | G | 1.719  | 0.08566 | +++ | 0 | 0.444 | 2 | 0.8008 |
| rs61290697  | 11 | 118412358 | T | C | 1.718  | 0.08572 | +++ | 0 | 0.444 | 2 | 0.801  |
| rs73022042  | 11 | 118408893 | A | G | 1.718  | 0.08581 | +++ | 0 | 0.436 | 2 | 0.8042 |
| rs11216913  | 11 | 118453681 | G | A | 1.717  | 0.08596 | +++ | 0 | 0.469 | 2 | 0.791  |
| rs59176377  | 11 | 118419295 | A | G | 1.716  | 0.08613 | +++ | 0 | 0.366 | 2 | 0.8326 |
| rs74404016  | 11 | 118408653 | T | C | 1.716  | 0.08613 | +++ | 0 | 0.444 | 2 | 0.8011 |
| rs111942423 | 11 | 118429764 | G | T | 1.715  | 0.08628 | +++ | 0 | 0.358 | 2 | 0.836  |
| rs7101585   | 11 | 118409583 | A | G | 1.715  | 0.08635 | +++ | 0 | 0.448 | 2 | 0.7992 |
| rs17122278  | 11 | 118449370 | G | A | 1.713  | 0.08677 | +++ | 0 | 0.53  | 2 | 0.7671 |
| rs73023341  | 11 | 118445585 | G | A | 1.712  | 0.08697 | +++ | 0 | 0.373 | 2 | 0.8297 |
| rs11216922  | 11 | 118465295 | G | A | 1.711  | 0.08707 | +++ | 0 | 0.377 | 2 | 0.828  |
| rs7110743   | 11 | 118825762 | A | C | 1.711  | 0.08713 | +?+ | 0 | 0.586 | 1 | 0.4438 |
| rs4435039   | 11 | 118297391 | G | A | 1.71   | 0.08724 | +++ | 0 | 0.913 | 2 | 0.6335 |
| rs10892317  | 11 | 118832035 | C | T | -1.71  | 0.08733 | --- | 0 | 1.021 | 2 | 0.6001 |
| rs7115634   | 11 | 118466249 | G | A | 1.709  | 0.08744 | +++ | 0 | 0.49  | 2 | 0.7827 |
| rs113975105 | 11 | 118836606 | G | C | -1.708 | 0.08772 | --- | 0 | 1.082 | 2 | 0.5822 |
| rs58577143  | 11 | 118291210 | G | A | 1.706  | 0.08804 | +++ | 0 | 1.748 | 2 | 0.4174 |
| rs11216887  | 11 | 118420736 | C | T | 1.705  | 0.08826 | +++ | 0 | 0.399 | 2 | 0.819  |
| rs535207    | 11 | 118408033 | G | A | 1.703  | 0.08855 | +++ | 0 | 0.441 | 2 | 0.8023 |
| rs11216910  | 11 | 118450046 | G | A | 1.703  | 0.08856 | +++ | 0 | 0.452 | 2 | 0.7977 |
| rs55844025  | 11 | 118446298 | T | C | 1.703  | 0.0886  | +++ | 0 | 0.487 | 2 | 0.7838 |

|             |    |           |   |   |        |         |     |       |       |   |         |
|-------------|----|-----------|---|---|--------|---------|-----|-------|-------|---|---------|
| rs11216916  | 11 | 118461605 | C | T | 1.701  | 0.08892 | +++ | 0     | 0.341 | 2 | 0.8431  |
| rs45548238  | 11 | 118405437 | T | C | 1.7    | 0.0891  | +++ | 0     | 0.495 | 2 | 0.7809  |
| rs17842763  | 11 | 118454177 | G | A | 1.699  | 0.08923 | +++ | 0     | 0.436 | 2 | 0.804   |
| rs7931564   | 11 | 118469571 | G | A | 1.698  | 0.08948 | +++ | 0     | 0.471 | 2 | 0.7903  |
| rs59255055  | 11 | 118296735 | A | C | 1.696  | 0.0899  | +++ | 0     | 0.516 | 2 | 0.7727  |
| rs45522239  | 11 | 118405438 | G | A | 1.693  | 0.0905  | +++ | 0     | 0.491 | 2 | 0.7822  |
| rs10502227  | 11 | 118147496 | C | T | 1.692  | 0.0906  | +?+ | -49.7 | 2.003 | 1 | 0.157   |
| rs3741323   | 11 | 118405641 | G | A | 1.69   | 0.0911  | +++ | 0     | 0.424 | 2 | 0.809   |
| rs10892315  | 11 | 118831727 | C | T | -1.687 | 0.09152 | --- | 0     | 0.945 | 2 | 0.6235  |
| rs60112336  | 11 | 118453483 | T | C | 1.684  | 0.09224 | +++ | 0     | 0.509 | 2 | 0.7752  |
| rs536256    | 11 | 118327321 | G | A | 1.681  | 0.09283 | +++ | 0     | 0.174 | 2 | 0.9167  |
| rs11216919  | 11 | 118462367 | G | A | 1.678  | 0.09338 | +++ | 0     | 0.27  | 2 | 0.8739  |
| rs6592500   | 11 | 72651705  | G | A | -1.677 | 0.09361 | +-- | -2.9  | 3.889 | 2 | 0.1431  |
| rs11603267  | 11 | 118146599 | T | G | 1.669  | 0.09514 | +?+ | -56.6 | 1.916 | 1 | 0.1663  |
| rs7108845   | 11 | 118407523 | G | T | 1.661  | 0.09673 | +++ | 0     | 0.433 | 2 | 0.8053  |
| rs113971393 | 11 | 72076181  | C | T | 1.659  | 0.09703 | +++ | 0     | 1.218 | 2 | 0.544   |
| rs11216914  | 11 | 118456414 | C | T | 1.658  | 0.09723 | +++ | 0     | 0.394 | 2 | 0.8213  |
| rs6589664   | 11 | 118404804 | A | G | 1.657  | 0.09756 | +++ | 0     | 1.223 | 2 | 0.5426  |
| rs3741324   | 11 | 118405835 | A | G | 1.649  | 0.09916 | +++ | 0     | 0.47  | 2 | 0.7905  |
| rs2886599   | 11 | 72721271  | A | C | 1.643  | 0.1003  | --- | 39.4  | 6.603 | 2 | 0.03682 |
| rs79915705  | 11 | 72016091  | C | T | 1.635  | 0.1021  | +++ | 0     | 0.52  | 2 | 0.7712  |
| rs11603313  | 11 | 72588177  | A | G | 1.634  | 0.1023  | --- | 47    | 7.551 | 2 | 0.02292 |
| rs58571741  | 11 | 72065710  | A | C | 1.634  | 0.1024  | +++ | 0     | 1.224 | 2 | 0.5423  |
| rs4938551   | 11 | 118707249 | C | G | 1.625  | 0.1041  | --- | 0     | 1.617 | 2 | 0.4456  |
| rs17244499  | 11 | 72629946  | G | A | 1.625  | 0.1042  | --- | 46.2  | 7.442 | 2 | 0.02422 |
| rs8192696   | 11 | 118895686 | T | C | -1.618 | 0.1056  | --- | 0     | 0.493 | 2 | 0.7817  |
| rs548877    | 11 | 118300240 | G | A | 1.618  | 0.1057  | +++ | 0     | 0.54  | 2 | 0.7633  |
| rs666191    | 11 | 118826063 | A | G | -1.615 | 0.1064  | -?- | 0     | 0.341 | 1 | 0.5592  |
| rs11605166  | 11 | 72669777  | C | T | 1.608  | 0.1079  | --- | 49.4  | 7.898 | 2 | 0.01927 |
| rs3814730   | 11 | 72555553  | A | G | 1.608  | 0.1079  | --- | 48    | 7.69  | 2 | 0.02138 |
| rs566416    | 11 | 118759610 | G | T | 1.605  | 0.1086  | --- | -63   | 2.454 | 2 | 0.2932  |
| rs4938507   | 11 | 118231584 | G | A | 1.602  | 0.1093  | +?+ | 0     | 0.216 | 1 | 0.6421  |
| rs77074463  | 11 | 118748170 | C | G | 1.6    | 0.1095  | +++ | 0     | 0.835 | 2 | 0.6586  |
| rs498684    | 11 | 118316960 | A | G | 1.6    | 0.1096  | +++ | 0     | 0.345 | 2 | 0.8414  |
| rs625291    | 11 | 118826060 | T | C | -1.599 | 0.1097  | -?- | 0     | 0.322 | 1 | 0.5705  |
| rs79281178  | 11 | 118298041 | G | C | 1.599  | 0.1099  | +++ | 0     | 0.475 | 2 | 0.7887  |
| rs34815971  | 11 | 118301066 | G | A | 1.596  | 0.1105  | +++ | 0     | 0.552 | 2 | 0.7589  |
| rs510997    | 11 | 118302901 | C | T | 1.594  | 0.1108  | +++ | 0     | 0.586 | 2 | 0.7458  |
| rs4426142   | 11 | 118824996 | A | G | -1.594 | 0.111   | -?- | 0     | 0.152 | 1 | 0.6968  |
| rs74439784  | 11 | 72649396  | T | A | 1.593  | 0.1111  | --- | 46.1  | 7.426 | 2 | 0.0244  |
| rs73613993  | 11 | 118296007 | C | T | 1.592  | 0.1114  | +++ | 0     | 0.533 | 2 | 0.7661  |
| rs145398037 | 11 | 72522142  | C | G | 1.59   | 0.1119  | --- | 51.1  | 8.175 | 2 | 0.01678 |
| rs7122959   | 11 | 118804283 | G | A | -1.586 | 0.1128  | --- | -44.6 | 2.766 | 2 | 0.2508  |
| rs45573242  | 11 | 118853995 | C | A | 1.581  | 0.1139  | --- | -48.4 | 2.695 | 2 | 0.2599  |
| rs7479331   | 11 | 118829521 | T | G | 1.574  | 0.1155  | +++ | -32.6 | 3.016 | 2 | 0.2213  |
| rs7123066   | 11 | 118804266 | T | C | -1.573 | 0.1158  | --- | -47.2 | 2.718 | 2 | 0.257   |
| rs118020807 | 11 | 118759905 | A | C | -1.571 | 0.1162  | -?- | 0     | 0.569 | 1 | 0.4506  |
| rs117819392 | 11 | 72514503  | T | C | 1.57   | 0.1163  | --- | 47.3  | 7.588 | 2 | 0.02251 |
| rs543692    | 11 | 118598138 | C | T | 1.567  | 0.1171  | --- | 8.4   | 4.369 | 2 | 0.1126  |
| rs563537    | 11 | 118595207 | A | T | 1.563  | 0.118   | --- | 10.1  | 4.451 | 2 | 0.108   |
| rs76793820  | 11 | 72619860  | A | G | 1.56   | 0.1187  | --- | 47.2  | 7.582 | 2 | 0.02257 |
| rs568688    | 11 | 118598612 | G | T | 1.558  | 0.1191  | --- | 9.1   | 4.402 | 2 | 0.1107  |
| rs2097131   | 11 | 118825069 | A | G | -1.554 | 0.1203  | -?- | 0     | 0.147 | 1 | 0.7019  |
| rs4515995   | 11 | 72687795  | G | A | -1.55  | 0.1212  | --- | 0     | 1.566 | 2 | 0.457   |

|             |    |           |   |   |        |        |     |        |       |   |          |
|-------------|----|-----------|---|---|--------|--------|-----|--------|-------|---|----------|
| rs566848    | 11 | 118711830 | G | A | 1.537  | 0.1243 | +++ | 0      | 0.792 | 2 | 0.6729   |
| rs75657287  | 11 | 118801518 | G | C | 1.535  | 0.1247 | +?+ | 0      | 0.129 | 1 | 0.72     |
| rs139534838 | 11 | 72506880  | C | T | 1.532  | 0.1255 | ++  | 50.1   | 8.022 | 2 | 0.01811  |
| rs61900157  | 11 | 118824439 | C | A | -1.531 | 0.1259 | -?- | 0      | 0.142 | 1 | 0.7063   |
| rs7124100   | 11 | 118290169 | A | G | 1.529  | 0.1262 | +++ | 0      | 0.677 | 2 | 0.713    |
| rs4938615   | 11 | 118865319 | G | C | 1.526  | 0.127  | +?+ | 0      | 0.943 | 1 | 0.3316   |
| rs9794909   | 11 | 118862306 | C | G | -1.521 | 0.1283 | --- | 0      | 1.112 | 2 | 0.5734   |
| rs146026283 | 11 | 118296322 | A | C | 1.52   | 0.1284 | +?+ | 0      | 0.284 | 1 | 0.5941   |
| rs113145584 | 11 | 118154798 | C | G | -1.518 | 0.129  | -?- | 0      | 0.909 | 1 | 0.3403   |
| rs11602858  | 11 | 72615069  | G | C | 1.513  | 0.1303 | ++  | 45.7   | 7.36  | 2 | 0.02523  |
| rs1059000   | 11 | 72504972  | C | G | 1.511  | 0.1308 | ++  | 49.2   | 7.871 | 2 | 0.01954  |
| rs676925    | 11 | 118765688 | G | C | 1.509  | 0.1313 | ++  | -83.1  | 2.185 | 2 | 0.3354   |
| rs11217052  | 11 | 118717732 | G | A | 1.508  | 0.1316 | ++  | 0      | 1.774 | 2 | 0.412    |
| rs537975    | 11 | 118362869 | T | C | 1.507  | 0.1318 | +++ | 0      | 0.179 | 2 | 0.9143   |
| rs111527225 | 11 | 118065830 | A | G | 1.502  | 0.1331 | +?+ | -139.7 | 1.252 | 1 | 0.2632   |
| rs112753655 | 11 | 118154795 | A | G | -1.501 | 0.1333 | -?- | 0      | 0.942 | 1 | 0.3317   |
| rs484232    | 11 | 118708564 | T | G | 1.5    | 0.1337 | ++  | 0      | 1.75  | 2 | 0.4168   |
| rs7940405   | 11 | 118142666 | G | A | -1.493 | 0.1354 | -?- | 0      | 0.034 | 1 | 0.8536   |
| rs117392768 | 11 | 72043182  | A | T | 1.493  | 0.1355 | +?+ | 0      | 0.894 | 1 | 0.3445   |
| rs12791838  | 11 | 118144209 | A | G | -1.493 | 0.1356 | -?- | 0      | 0.032 | 1 | 0.8581   |
| rs35610956  | 11 | 118144280 | G | A | -1.491 | 0.1359 | -?- | 0      | 0.032 | 1 | 0.8571   |
| rs680465    | 11 | 118500963 | A | G | 1.491  | 0.1359 | +?- | 59.4   | 7.394 | 1 | 0.006544 |
| rs629470    | 11 | 118320553 | A | G | 1.491  | 0.136  | +++ | 0      | 0.476 | 2 | 0.7881   |
| rs56785719  | 11 | 118176623 | G | C | -1.49  | 0.1363 | -?- | 0      | 0.826 | 1 | 0.3635   |
| rs113488707 | 11 | 118045876 | T | C | 1.486  | 0.1373 | +?+ | 0      | 0.755 | 1 | 0.385    |
| rs7126193   | 11 | 118866126 | C | T | -1.486 | 0.1373 | --- | 0      | 1.322 | 2 | 0.5164   |
| rs502514    | 11 | 118241995 | C | T | -1.484 | 0.1377 | --- | 0      | 1.794 | 2 | 0.4079   |
| rs12577045  | 11 | 118151446 | A | G | -1.484 | 0.1379 | -?- | 0      | 0.79  | 1 | 0.374    |
| rs4936454   | 11 | 118859274 | T | C | -1.482 | 0.1384 | --- | 0      | 1.214 | 2 | 0.545    |
| rs117705968 | 11 | 72037907  | A | C | 1.48   | 0.1388 | +?+ | 0      | 0.87  | 1 | 0.3511   |
| rs4938498   | 11 | 118162147 | G | C | -1.48  | 0.139  | -?- | 0      | 0     | 1 | 0.987    |
| rs663003    | 11 | 118823148 | T | C | -1.479 | 0.1392 | -?- | 0      | 0.219 | 1 | 0.6397   |
| rs11217112  | 11 | 118856920 | G | A | -1.478 | 0.1394 | --- | 0      | 1.188 | 2 | 0.5522   |
| rs3759004   | 11 | 118136836 | T | C | -1.478 | 0.1394 | -?- | 0      | 0.026 | 1 | 0.8724   |
| rs12417431  | 11 | 118137383 | G | A | -1.478 | 0.1395 | -?- | 0      | 0.026 | 1 | 0.8723   |
| rs11217116  | 11 | 118864140 | C | T | -1.477 | 0.1397 | --- | 0      | 1.167 | 2 | 0.558    |
| rs4938613   | 11 | 118863116 | G | A | -1.477 | 0.1398 | --- | 0      | 1.162 | 2 | 0.5594   |
| rs111491960 | 11 | 118833458 | G | A | 1.475  | 0.1402 | ++  | -38.6  | 2.886 | 2 | 0.2363   |
| rs117902312 | 11 | 72042303  | G | C | 1.475  | 0.1403 | +?+ | 0      | 0.86  | 1 | 0.3538   |
| rs4936456   | 11 | 118863324 | T | C | -1.473 | 0.1408 | --- | 0      | 1.167 | 2 | 0.5581   |
| rs12576119  | 11 | 118158441 | A | G | -1.47  | 0.1417 | -?- | 0      | 0.865 | 1 | 0.3523   |
| rs60545357  | 11 | 118281418 | C | A | 1.47   | 0.1417 | +++ | 0      | 0.943 | 2 | 0.624    |
| rs10892301  | 11 | 118735476 | A | G | 1.469  | 0.1419 | ++  | 0      | 1.69  | 2 | 0.4296   |
| rs11217118  | 11 | 118866072 | A | G | -1.469 | 0.1419 | --- | 0      | 1.194 | 2 | 0.5505   |
| rs12289253  | 11 | 118405068 | G | A | 1.469  | 0.1419 | +++ | 0      | 0.194 | 2 | 0.9075   |
| rs4938559   | 11 | 118718061 | T | C | 1.468  | 0.1421 | +++ | 0      | 1.716 | 2 | 0.4239   |
| rs59626457  | 11 | 118862634 | G | A | -1.466 | 0.1426 | --- | 0      | 1.143 | 2 | 0.5648   |
| rs59316586  | 11 | 118856816 | C | A | -1.464 | 0.1431 | --- | 0      | 1.237 | 2 | 0.5388   |
| rs4936455   | 11 | 118861389 | T | C | -1.464 | 0.1432 | --- | 0      | 1.237 | 2 | 0.5387   |
| rs3132893   | 11 | 118303822 | A | C | 1.463  | 0.1436 | +++ | 0      | 0.418 | 2 | 0.8116   |
| rs4938560   | 11 | 118718062 | G | A | 1.46   | 0.1444 | ++  | 0      | 1.71  | 2 | 0.4254   |
| rs12420795  | 11 | 118161885 | G | C | -1.456 | 0.1455 | -?- | 0      | 0     | 1 | 0.9963   |
| rs118115020 | 11 | 72067731  | T | C | 1.454  | 0.1458 | +?+ | -181.3 | 1.067 | 1 | 0.3017   |
| rs12362865  | 11 | 118859842 | G | A | -1.452 | 0.1464 | --- | 0      | 1.153 | 2 | 0.562    |

|             |    |           |   |   |        |        |     |       |       |   |         |
|-------------|----|-----------|---|---|--------|--------|-----|-------|-------|---|---------|
| rs113611963 | 11 | 118839610 | G | T | 1.45   | 0.147  | ++  | -38.9 | 2.879 | 2 | 0.237   |
| rs570424    | 11 | 118588998 | C | T | 1.45   | 0.1472 | ++  | 11.2  | 4.506 | 2 | 0.1051  |
| rs117225442 | 11 | 72060986  | A | G | 1.448  | 0.1477 | ??  | 0     | 0.852 | 1 | 0.3561  |
| rs12416826  | 11 | 118165955 | C | T | -1.447 | 0.148  | -?- | 0     | 0     | 1 | 0.9967  |
| rs2120269   | 11 | 118151135 | C | T | -1.445 | 0.1485 | -?- | 0     | 0.664 | 1 | 0.4153  |
| rs7928058   | 11 | 118171239 | T | G | -1.444 | 0.1487 | -?- | 0     | 0     | 1 | 0.9842  |
| rs524936    | 11 | 118341921 | A | G | 1.443  | 0.1489 | +++ | 0     | 1.417 | 2 | 0.4924  |
| rs602716    | 11 | 118801235 | A | G | 1.444  | 0.1489 | ++  | 35.7  | 6.221 | 2 | 0.04457 |
| rs543824    | 11 | 118762218 | G | A | 1.442  | 0.1494 | ++  | 0     | 1.961 | 2 | 0.3751  |
| rs45534632  | 11 | 118840705 | G | A | 1.44   | 0.1499 | ++  | -45.9 | 2.741 | 2 | 0.254   |
| rs4938558   | 11 | 118717929 | T | C | 1.44   | 0.15   | +++ | 0     | 0.874 | 2 | 0.6459  |
| rs17122170  | 11 | 118296668 | C | G | 1.439  | 0.1502 | +++ | 0     | 0.275 | 2 | 0.8714  |
| rs3862791   | 11 | 72501002  | T | C | 1.439  | 0.1502 | ++  | 46.6  | 7.485 | 2 | 0.02369 |
| rs117939125 | 11 | 72062164  | G | T | 1.437  | 0.1506 | ??  | 0     | 0.731 | 1 | 0.3924  |
| rs11607701  | 11 | 118169825 | G | A | -1.435 | 0.1513 | -?- | 0     | 0.001 | 1 | 0.9769  |
| rs11216845  | 11 | 118163216 | T | C | -1.434 | 0.1515 | -?- | 0     | 0.016 | 1 | 0.9006  |
| rs535327    | 11 | 118341785 | G | A | 1.433  | 0.1519 | +++ | 0     | 1.383 | 2 | 0.5007  |
| rs67774926  | 11 | 118157623 | G | C | -1.433 | 0.1519 | -?- | 0     | 0.828 | 1 | 0.3629  |
| rs4938614   | 11 | 118863232 | A | G | -1.433 | 0.152  | -?- | 0     | 0.628 | 1 | 0.4279  |
| rs55736521  | 11 | 118840506 | T | C | 1.432  | 0.152  | ++  | -47.4 | 2.714 | 2 | 0.2574  |
| rs117215416 | 11 | 72046796  | C | T | 1.431  | 0.1525 | ??  | 0     | 0.78  | 1 | 0.3771  |
| rs189530708 | 11 | 118272454 | G | C | -1.431 | 0.1526 | --- | 13.2  | 4.611 | 2 | 0.09973 |
| rs4938494   | 11 | 118150735 | C | G | -1.429 | 0.153  | -?- | 0     | 0.69  | 1 | 0.4062  |
| rs11600727  | 11 | 72201499  | C | A | 1.425  | 0.1541 | ++  | 0     | 1.579 | 2 | 0.4541  |
| rs3782040   | 11 | 118176097 | G | A | -1.425 | 0.1541 | -?- | 0     | 0.857 | 1 | 0.3545  |
| rs2032397   | 11 | 118153697 | A | G | -1.423 | 0.1547 | -?- | 0     | 0     | 1 | 0.9974  |
| rs561775    | 11 | 118341212 | G | A | 1.422  | 0.1551 | +++ | 0     | 1.329 | 2 | 0.5144  |
| rs2032398   | 11 | 118153708 | C | G | -1.421 | 0.1553 | -?- | 0     | 0     | 1 | 0.9958  |
| rs80045923  | 11 | 72063551  | T | C | 1.42   | 0.1555 | ??  | 0     | 0.762 | 1 | 0.3828  |
| rs11216844  | 11 | 118162796 | G | A | -1.42  | 0.1556 | -?- | 0     | 0.021 | 1 | 0.8835  |
| rs117190399 | 11 | 72056023  | T | G | 1.419  | 0.1558 | ??  | 0     | 0.76  | 1 | 0.3833  |
| rs56140791  | 11 | 118167190 | C | T | -1.418 | 0.1562 | -?- | 0     | 0.805 | 1 | 0.3695  |
| rs4938610   | 11 | 118857466 | C | T | -1.418 | 0.1563 | -?- | 0     | 0.582 | 1 | 0.4454  |
| rs3889526   | 11 | 118856491 | A | C | -1.417 | 0.1564 | -?- | 0     | 0.558 | 1 | 0.455   |
| rs1599809   | 11 | 118179200 | A | G | -1.417 | 0.1566 | -?- | 0     | 0.676 | 1 | 0.4109  |
| rs615166    | 11 | 118803536 | A | G | 1.414  | 0.1572 | ++  | 34.2  | 6.08  | 2 | 0.04784 |
| rs10898893  | 11 | 72676699  | C | T | -1.413 | 0.1576 | --- | -75.6 | 2.278 | 2 | 0.3202  |
| rs587263    | 11 | 118816156 | C | T | 1.411  | 0.1581 | +++ | 0     | 1.532 | 2 | 0.4649  |
| rs7110034   | 11 | 118858911 | A | C | -1.412 | 0.1581 | -?- | 0     | 0.787 | 1 | 0.3751  |
| rs67604597  | 11 | 118154836 | G | T | -1.411 | 0.1582 | -?- | 0     | 0.799 | 1 | 0.3714  |
| rs60652614  | 11 | 118168543 | T | G | -1.408 | 0.1592 | -?- | 0     | 0.736 | 1 | 0.3909  |
| rs61706007  | 11 | 118167278 | G | T | -1.408 | 0.1592 | -?- | 0     | 0.823 | 1 | 0.3642  |
| rs688035    | 11 | 118802492 | G | C | 1.408  | 0.1592 | ++  | 32.2  | 5.897 | 2 | 0.05243 |
| rs117613362 | 11 | 72051945  | C | A | 1.406  | 0.1598 | ??  | 0     | 0.737 | 1 | 0.3908  |
| rs57300701  | 11 | 118845546 | G | C | 1.406  | 0.1598 | ++  | -62.6 | 2.459 | 2 | 0.2924  |
| rs117498960 | 11 | 72065210  | C | T | 1.405  | 0.1601 | ??  | 0     | 0.967 | 1 | 0.3255  |
| rs2851460   | 11 | 118716563 | A | G | 1.404  | 0.1602 | --- | -92   | 2.084 | 2 | 0.3528  |
| rs55940627  | 11 | 118163920 | A | G | -1.404 | 0.1602 | -?- | 0     | 0.742 | 1 | 0.389   |
| rs56357739  | 11 | 118158507 | G | A | -1.403 | 0.1605 | -?- | 0     | 0.666 | 1 | 0.4145  |
| rs57075232  | 11 | 118159371 | T | C | -1.403 | 0.1605 | -?- | 0     | 0.688 | 1 | 0.407   |
| rs4245414   | 11 | 72188466  | A | G | 1.401  | 0.1611 | ++  | 0     | 1.808 | 2 | 0.405   |
| rs4938501   | 11 | 118166497 | C | T | -1.401 | 0.1611 | -?- | 0     | 0.8   | 1 | 0.3711  |
| rs12418805  | 11 | 72188979  | C | T | 1.401  | 0.1612 | ++  | 0     | 1.807 | 2 | 0.4051  |
| rs4938612   | 11 | 118863037 | C | T | -1.401 | 0.1613 | -?- | 0     | 0.577 | 1 | 0.4475  |

|             |    |           |   |   |        |        |     |       |       |   |        |
|-------------|----|-----------|---|---|--------|--------|-----|-------|-------|---|--------|
| rs4938566   | 11 | 118721189 | T | A | 1.4    | 0.1616 | +++ | 0     | 0.767 | 2 | 0.6814 |
| rs56066890  | 11 | 118169790 | C | T | -1.398 | 0.1621 | -?- | 0     | 0.729 | 1 | 0.3932 |
| rs4938565   | 11 | 118720998 | A | G | 1.398  | 0.1622 | +++ | 0     | 0.772 | 2 | 0.6797 |
| rs1970750   | 11 | 118149122 | T | C | -1.397 | 0.1624 | -?- | 0     | 0.026 | 1 | 0.8727 |
| rs59134737  | 11 | 118160959 | T | G | -1.395 | 0.1631 | -?- | 0     | 0.716 | 1 | 0.3976 |
| rs149666559 | 11 | 72042565  | A | G | 1.394  | 0.1632 | +?+ | 0     | 0.877 | 1 | 0.349  |
| rs59138930  | 11 | 118173783 | T | C | -1.394 | 0.1633 | -?- | 0     | 0.803 | 1 | 0.3703 |
| rs11217117  | 11 | 118865992 | T | C | -1.394 | 0.1635 | -?- | 0     | 0.588 | 1 | 0.4431 |
| rs12576947  | 11 | 118158055 | C | T | -1.393 | 0.1635 | -?- | 0     | 0.682 | 1 | 0.4089 |
| rs59399105  | 11 | 118168568 | A | C | -1.393 | 0.1637 | -?- | 0     | 0.762 | 1 | 0.3826 |
| rs58093803  | 11 | 118168156 | C | T | -1.391 | 0.1641 | -?- | 0     | 0.765 | 1 | 0.3819 |
| rs59450866  | 11 | 118167707 | T | C | -1.391 | 0.1641 | -?- | 0     | 0.765 | 1 | 0.3818 |
| rs7110019   | 11 | 118168617 | G | A | -1.391 | 0.1643 | -?- | 0     | 0.862 | 1 | 0.3531 |
| rs12576941  | 11 | 118158002 | C | T | -1.39  | 0.1644 | -?- | 0     | 0.687 | 1 | 0.4072 |
| rs495132    | 11 | 118335927 | A | G | 1.39   | 0.1645 | +++ | 0     | 1.344 | 2 | 0.5107 |
| rs4936440   | 11 | 118720684 | G | C | 1.39   | 0.1646 | +++ | 0     | 0.782 | 2 | 0.6763 |
| rs4938567   | 11 | 118721249 | G | A | 1.39   | 0.1647 | +++ | 0     | 0.792 | 2 | 0.6731 |
| rs12225399  | 11 | 118480285 | C | G | 1.389  | 0.1649 | +?+ | 0     | 0.228 | 1 | 0.6331 |
| rs947848    | 11 | 72895007  | T | A | -1.389 | 0.1649 | ++- | 1.6   | 4.065 | 2 | 0.131  |
| rs4943910   | 11 | 72188643  | T | C | 1.388  | 0.1651 | ++- | 0     | 1.787 | 2 | 0.4092 |
| rs7124127   | 11 | 118006408 | C | T | 1.388  | 0.1651 | ++  | -88.7 | 2.12  | 2 | 0.3464 |
| rs3887015   | 11 | 118156410 | C | T | -1.385 | 0.166  | -?- | 0     | 0.696 | 1 | 0.4042 |
| rs56318049  | 11 | 118166608 | C | T | -1.385 | 0.166  | -?- | 0     | 0.776 | 1 | 0.3785 |
| rs66832804  | 11 | 118157049 | A | T | -1.385 | 0.166  | -?- | 0     | 0.696 | 1 | 0.4043 |
| rs7926133   | 11 | 72647296  | C | T | -1.385 | 0.166  | --+ | 0     | 1.975 | 2 | 0.3726 |
| rs573971    | 11 | 118393396 | A | G | 1.385  | 0.1661 | +++ | 0     | 0.173 | 2 | 0.9169 |
| rs4938570   | 11 | 118722231 | G | A | 1.384  | 0.1663 | +++ | 0     | 0.783 | 2 | 0.6762 |
| rs572126    | 11 | 118359161 | G | A | 1.384  | 0.1663 | +++ | 0     | 0.23  | 2 | 0.8915 |
| rs61390396  | 11 | 118156718 | T | C | -1.384 | 0.1663 | -?- | 0     | 0.697 | 1 | 0.4038 |
| rs1945765   | 11 | 118182829 | A | T | -1.384 | 0.1664 | -?- | 0     | 0.826 | 1 | 0.3634 |
| rs55910314  | 11 | 118163780 | T | C | -1.384 | 0.1664 | -?- | 0     | 0.778 | 1 | 0.3778 |
| rs4938564   | 11 | 118720590 | T | G | 1.383  | 0.1666 | +++ | 0     | 0.771 | 2 | 0.6801 |
| rs2187491   | 11 | 118718972 | C | T | 1.383  | 0.1667 | +++ | 0     | 0.721 | 2 | 0.6974 |
| rs56938099  | 11 | 118156688 | G | A | -1.383 | 0.1667 | -?- | 0     | 0.7   | 1 | 0.4029 |
| rs10892298  | 11 | 118724336 | C | T | 1.382  | 0.167  | +++ | 0     | 0.788 | 2 | 0.6744 |
| rs55899310  | 11 | 118158702 | C | T | -1.382 | 0.1671 | -?- | 0     | 0.702 | 1 | 0.4022 |
| rs7103314   | 11 | 118723537 | G | A | 1.382  | 0.1671 | +++ | 0     | 0.788 | 2 | 0.6742 |
| rs3825051   | 11 | 118174629 | G | A | -1.381 | 0.1674 | -?- | 0     | 0.835 | 1 | 0.3608 |
| rs538645    | 11 | 118711069 | C | T | 1.38   | 0.1676 | +++ | 0     | 0.891 | 2 | 0.6404 |
| rs11217059  | 11 | 118723087 | T | C | 1.38   | 0.1677 | +++ | 0     | 0.793 | 2 | 0.6726 |
| rs12576100  | 11 | 118158281 | A | G | -1.38  | 0.1677 | -?- | 0     | 0.705 | 1 | 0.4012 |
| rs12576118  | 11 | 118158440 | A | G | -1.379 | 0.1678 | -?- | 0     | 0.705 | 1 | 0.401  |
| rs4938500   | 11 | 118166212 | A | C | -1.379 | 0.1679 | -?- | 0     | 0.011 | 1 | 0.9159 |
| rs3132786   | 11 | 118365956 | C | T | 1.378  | 0.1682 | +++ | 0     | 0.213 | 2 | 0.8989 |
| rs11607671  | 11 | 72192738  | T | C | 1.377  | 0.1684 | ++- | 0     | 1.771 | 2 | 0.4125 |
| rs2156751   | 11 | 118718856 | G | A | 1.377  | 0.1686 | +++ | 0     | 0.735 | 2 | 0.6925 |
| rs4274214   | 11 | 72188003  | T | C | 1.377  | 0.1686 | ++- | 0     | 1.77  | 2 | 0.4127 |
| rs4938499   | 11 | 118162496 | C | T | -1.377 | 0.1686 | -?- | 0     | 0.791 | 1 | 0.3738 |
| rs55798741  | 11 | 118154114 | T | G | -1.376 | 0.1688 | -?- | 0     | 0.78  | 1 | 0.377  |
| rs4290240   | 11 | 118853488 | G | A | -1.376 | 0.1689 | -?- | 0     | 0.79  | 1 | 0.3741 |
| rs55806415  | 11 | 118162862 | A | G | -1.376 | 0.1689 | -?- | 0     | 0.792 | 1 | 0.3734 |
| rs58520343  | 11 | 118155000 | T | A | -1.376 | 0.1689 | -?- | 0     | 0.712 | 1 | 0.3989 |
| rs6592474   | 11 | 72184290  | A | T | 1.376  | 0.1689 | ++- | 0     | 1.769 | 2 | 0.413  |
| rs1074459   | 11 | 118155997 | C | T | -1.374 | 0.1696 | -?- | 0     | 0.715 | 1 | 0.3978 |

|             |    |           |   |   |        |        |     |       |       |   |        |
|-------------|----|-----------|---|---|--------|--------|-----|-------|-------|---|--------|
| rs58210741  | 11 | 118159326 | G | C | -1.373 | 0.1697 | -?- | 0     | 0.739 | 1 | 0.39   |
| rs61900902  | 11 | 118159684 | C | T | -1.373 | 0.1697 | -?- | 0     | 0     | 1 | 1      |
| rs2365385   | 11 | 72194718  | A | G | 1.373  | 0.1699 | ++  | 0     | 1.773 | 2 | 0.4122 |
| rs55815657  | 11 | 118155074 | A | G | -1.372 | 0.17   | -?- | 0     | 0.717 | 1 | 0.3971 |
| rs1318166   | 11 | 118171058 | G | A | -1.372 | 0.1701 | -?- | 0     | 0.775 | 1 | 0.3788 |
| rs67462512  | 11 | 118155336 | C | G | -1.37  | 0.1706 | -?- | 0     | 0.713 | 1 | 0.3983 |
| rs58983315  | 11 | 118167759 | A | G | -1.37  | 0.1707 | -?- | 0     | 0.686 | 1 | 0.4075 |
| rs17310153  | 11 | 72190863  | G | A | 1.37   | 0.1708 | ++  | 0     | 1.76  | 2 | 0.4148 |
| rs1074457   | 11 | 118156117 | T | A | -1.369 | 0.171  | -?- | 0     | 0.723 | 1 | 0.3951 |
| rs7946961   | 11 | 118721850 | G | A | 1.369  | 0.1711 | +++ | 0     | 0.82  | 2 | 0.6636 |
| rs11607688  | 11 | 72192830  | T | C | 1.368  | 0.1714 | +++ | 0     | 1.763 | 2 | 0.4142 |
| rs12577820  | 11 | 118164233 | T | C | -1.368 | 0.1714 | -?- | 0     | 0.807 | 1 | 0.3691 |
| rs118105218 | 11 | 72077497  | G | T | 1.366  | 0.172  | +?+ | 0     | 0.891 | 1 | 0.3451 |
| rs12576486  | 11 | 118235490 | C | T | 1.365  | 0.1722 | +++ | 0     | 0.968 | 2 | 0.6164 |
| rs2156749   | 11 | 118719405 | G | C | 1.365  | 0.1722 | +++ | 0     | 0.727 | 2 | 0.6951 |
| rs56224295  | 11 | 118161891 | A | G | -1.365 | 0.1724 | -?- | 0     | 0.756 | 1 | 0.3847 |
| rs45480496  | 11 | 118270715 | A | G | 1.364  | 0.1725 | +++ | 0     | 0.845 | 2 | 0.6554 |
| rs4938497   | 11 | 118160851 | A | G | -1.364 | 0.1727 | -?- | 0     | 0     | 1 | 0.9925 |
| rs56020103  | 11 | 118172132 | T | C | -1.363 | 0.1728 | -?- | 0     | 0.749 | 1 | 0.3869 |
| rs117652953 | 11 | 72084357  | G | A | 1.363  | 0.173  | +?+ | 0     | 0.886 | 1 | 0.3467 |
| rs11217062  | 11 | 118725420 | A | G | 1.362  | 0.1732 | +++ | 0     | 0.902 | 2 | 0.637  |
| rs56346212  | 11 | 118172342 | A | T | -1.362 | 0.1733 | -?- | 0     | 0.751 | 1 | 0.3861 |
| rs894678    | 11 | 118172520 | A | G | -1.362 | 0.1733 | -?- | 0     | 0.001 | 1 | 0.9698 |
| rs56292628  | 11 | 118163872 | A | G | -1.359 | 0.1742 | -?- | 0     | 0.823 | 1 | 0.3644 |
| rs2156750   | 11 | 118719254 | C | T | 1.357  | 0.1747 | +++ | 0     | 0.745 | 2 | 0.6889 |
| rs7480736   | 11 | 118172364 | C | T | -1.357 | 0.1747 | -?- | 0     | 0.759 | 1 | 0.3837 |
| rs73613959  | 11 | 118263054 | A | G | 1.356  | 0.1751 | +++ | 0     | 0.855 | 2 | 0.6522 |
| rs75128335  | 11 | 118072915 | A | G | 1.356  | 0.1751 | +?+ | 0     | 0.937 | 1 | 0.333  |
| rs4943907   | 11 | 72183348  | T | C | 1.354  | 0.1758 | ++  | 0     | 1.725 | 2 | 0.4221 |
| rs894677    | 11 | 118172535 | T | C | -1.353 | 0.1759 | -?- | 0     | 0.758 | 1 | 0.3839 |
| rs4936424   | 11 | 118009674 | T | C | 1.353  | 0.1762 | ++  | -7.7  | 3.715 | 2 | 0.1561 |
| rs55789743  | 11 | 118171949 | A | C | -1.352 | 0.1763 | -?- | 0     | 0.767 | 1 | 0.381  |
| rs60618948  | 11 | 118155814 | A | G | -1.351 | 0.1767 | -?- | 0     | 0.754 | 1 | 0.3853 |
| rs3759002   | 11 | 118136160 | A | G | 1.35   | 0.177  | +?- | -19.5 | 2.51  | 1 | 0.1131 |
| rs7116715   | 11 | 118719742 | C | T | 1.347  | 0.178  | +++ | 0     | 0.729 | 2 | 0.6946 |
| rs4290266   | 11 | 118285995 | A | G | 1.338  | 0.181  | +++ | 0     | 0.436 | 2 | 0.804  |
| rs12420153  | 11 | 72195852  | A | G | 1.333  | 0.1824 | ++  | 0     | 1.71  | 2 | 0.4253 |
| rs10790239  | 11 | 118001445 | T | C | -1.332 | 0.1828 | -?- | 0     | 0.122 | 1 | 0.7274 |
| rs3759006   | 11 | 118137560 | A | G | -1.332 | 0.183  | -?- | 0     | 0.002 | 1 | 0.9613 |
| rs77643000  | 11 | 118749563 | C | T | 1.327  | 0.1845 | +++ | 0     | 0.657 | 2 | 0.72   |
| rs4938561   | 11 | 118718485 | C | T | 1.325  | 0.1851 | +++ | 0     | 0.747 | 2 | 0.6884 |
| rs34180117  | 11 | 118138629 | T | C | -1.32  | 0.187  | -?- | 0     | 0.004 | 1 | 0.9497 |
| rs3759005   | 11 | 118136871 | G | A | -1.319 | 0.1871 | -?- | 0     | 0.004 | 1 | 0.9514 |
| rs1079118   | 11 | 118258056 | A | G | 1.317  | 0.1878 | +++ | 0     | 0.736 | 2 | 0.692  |
| rs35850218  | 11 | 118138922 | C | T | -1.317 | 0.1878 | -?- | 0     | 0.004 | 1 | 0.9476 |
| rs2156755   | 11 | 118726230 | A | G | 1.317  | 0.1879 | +++ | 0     | 0.79  | 2 | 0.6736 |
| rs12795905  | 11 | 118140597 | T | C | -1.315 | 0.1886 | -?- | 0     | 0.004 | 1 | 0.9478 |
| rs61059752  | 11 | 118246071 | A | C | 1.315  | 0.1886 | +++ | 0     | 0.721 | 2 | 0.6972 |
| rs3759003   | 11 | 118136745 | G | T | -1.313 | 0.1892 | -?- | 0     | 0.002 | 1 | 0.964  |
| rs67307131  | 11 | 118480223 | C | T | 1.313  | 0.1892 | +?+ | 0     | 0.418 | 1 | 0.5179 |
| rs4938606   | 11 | 118852081 | G | A | -1.312 | 0.1894 | -?- | 0     | 0.563 | 1 | 0.453  |
| rs1790186   | 11 | 118846355 | T | C | -1.312 | 0.1895 | -?+ | -48.7 | 2.017 | 1 | 0.1556 |
| rs75896506  | 11 | 72429579  | A | G | 1.31   | 0.1903 | ++  | 12.8  | 4.586 | 2 | 0.1009 |
| rs78312641  | 11 | 118749318 | A | T | 1.31   | 0.1903 | +++ | 0     | 0.621 | 2 | 0.7332 |

|             |    |           |   |   |        |        |     |        |       |   |         |
|-------------|----|-----------|---|---|--------|--------|-----|--------|-------|---|---------|
| rs11607245  | 11 | 118843448 | T | C | -1.309 | 0.1905 | --- | 0      | 0.419 | 2 | 0.8111  |
| rs3759007   | 11 | 118137667 | T | C | -1.308 | 0.1908 | -?- | 0      | 0.005 | 1 | 0.9426  |
| rs543583    | 11 | 118847196 | A | G | -1.308 | 0.191  | -?+ | -49.7  | 2.004 | 1 | 0.1569  |
| rs56128937  | 11 | 118139478 | A | T | -1.307 | 0.1912 | -?- | 0      | 0.006 | 1 | 0.9397  |
| rs117088064 | 11 | 72074257  | T | C | 1.306  | 0.1915 | +?+ | 0      | 0.948 | 1 | 0.3301  |
| rs11822344  | 11 | 118864777 | C | G | -1.306 | 0.1915 | --- | 0      | 1.015 | 2 | 0.602   |
| rs117162202 | 11 | 72077463  | A | G | 1.306  | 0.1917 | +?+ | 0      | 0.947 | 1 | 0.3304  |
| rs55852239  | 11 | 118139755 | A | G | -1.306 | 0.1917 | -?- | 0      | 0.006 | 1 | 0.9405  |
| rs12789276  | 11 | 118140203 | G | A | -1.303 | 0.1927 | -?- | 0      | 0.006 | 1 | 0.9381  |
| rs34786601  | 11 | 118140136 | C | T | -1.302 | 0.1928 | -?- | 0      | 0.006 | 1 | 0.9379  |
| rs7933963   | 11 | 118246906 | T | C | 1.302  | 0.193  | +++ | 0      | 0.673 | 2 | 0.7142  |
| rs7948683   | 11 | 118137911 | A | G | -1.301 | 0.1934 | -?- | 0      | 0.006 | 1 | 0.9366  |
| rs73613980  | 11 | 118284650 | T | C | 1.299  | 0.1939 | +++ | 0      | 0.359 | 2 | 0.8356  |
| rs12793790  | 11 | 118140372 | A | G | -1.295 | 0.1952 | -?- | 0      | 0.007 | 1 | 0.9323  |
| rs1945764   | 11 | 118182801 | G | A | -1.295 | 0.1952 | --- | 0      | 0.359 | 2 | 0.8358  |
| rs4544037   | 11 | 118222062 | C | T | 1.294  | 0.1958 | +++ | 0      | 1.37  | 2 | 0.5041  |
| rs12419365  | 11 | 118112332 | A | C | 1.286  | 0.1983 | +?+ | -160.3 | 1.152 | 1 | 0.283   |
| rs3212264   | 11 | 118216234 | A | C | 1.286  | 0.1984 | +++ | 0      | 1.403 | 2 | 0.4959  |
| rs45489394  | 11 | 118228968 | G | C | 1.286  | 0.1986 | +++ | 0      | 1.339 | 2 | 0.5118  |
| rs7933007   | 11 | 118730669 | C | T | 1.284  | 0.1992 | +++ | 0      | 0.88  | 2 | 0.6442  |
| rs9666462   | 11 | 118275997 | A | G | 1.283  | 0.1995 | +++ | 0      | 0.378 | 2 | 0.8279  |
| rs11603334  | 11 | 72432985  | A | G | 1.282  | 0.1999 | ++  | 12.4   | 4.568 | 2 | 0.1019  |
| rs1599810   | 11 | 118179197 | A | G | -1.282 | 0.2    | --- | 0      | 0.375 | 2 | 0.8292  |
| rs150193966 | 11 | 72071662  | A | G | 1.271  | 0.2036 | +?+ | 0      | 0.882 | 1 | 0.3478  |
| rs117498055 | 11 | 72022810  | A | G | 1.271  | 0.2037 | +?+ | 0      | 0.56  | 1 | 0.4542  |
| rs12806041  | 11 | 118138998 | G | A | -1.271 | 0.2038 | -?- | 0      | 0.013 | 1 | 0.9109  |
| rs9666463   | 11 | 118276116 | G | C | 1.27   | 0.2042 | +++ | 0      | 0.359 | 2 | 0.8357  |
| rs117091621 | 11 | 72026473  | T | C | 1.269  | 0.2044 | +?+ | 0      | 0.558 | 1 | 0.4552  |
| rs523604    | 11 | 118755738 | G | A | -1.266 | 0.2055 | --- | 0      | 0.254 | 2 | 0.8809  |
| rs17122157  | 11 | 118276492 | A | G | 1.264  | 0.2062 | +++ | 0      | 0.358 | 2 | 0.8363  |
| rs116888156 | 11 | 72009595  | A | G | 1.261  | 0.2073 | +?+ | 0      | 0.724 | 1 | 0.3948  |
| rs7483081   | 11 | 118276246 | C | T | 1.261  | 0.2075 | +++ | 0      | 0.361 | 2 | 0.8347  |
| rs55942271  | 11 | 118177115 | T | C | -1.26  | 0.2076 | --- | 0      | 0.352 | 2 | 0.8388  |
| rs1552224   | 11 | 72433098  | C | A | 1.256  | 0.2091 | ++  | 13.8   | 4.643 | 2 | 0.09813 |
| rs4537793   | 11 | 118053156 | A | C | 1.255  | 0.2095 | +++ | 0      | 0.297 | 2 | 0.862   |
| rs4936451   | 11 | 118852137 | T | C | -1.252 | 0.2106 | --- | 0      | 0.671 | 2 | 0.715   |
| rs77342802  | 11 | 72012038  | C | G | 1.247  | 0.2125 | +?+ | 0      | 0.7   | 1 | 0.4028  |
| rs7939212   | 11 | 72021876  | T | G | 1.243  | 0.2138 | +?+ | 0      | 0.588 | 1 | 0.4433  |
| rs117524306 | 11 | 72014266  | G | A | 1.242  | 0.2143 | +?+ | 0      | 0.692 | 1 | 0.4056  |
| rs11825496  | 11 | 118855221 | G | T | -1.242 | 0.2143 | --- | 0      | 0.598 | 2 | 0.7416  |
| rs7940087   | 11 | 72021877  | T | C | 1.241  | 0.2146 | +?+ | 0      | 0.585 | 1 | 0.4445  |
| rs4456264   | 11 | 118851138 | T | C | -1.238 | 0.2157 | --- | 0      | 0.633 | 2 | 0.7288  |
| rs7129793   | 11 | 72455885  | T | C | 1.236  | 0.2165 | -++ | 31.7   | 5.855 | 2 | 0.05354 |
| rs45527340  | 11 | 118852526 | G | C | -1.235 | 0.2167 | --- | 0      | 0.633 | 2 | 0.7287  |
| rs477106    | 11 | 118363424 | A | C | 1.235  | 0.2168 | +++ | 0      | 0.283 | 2 | 0.8681  |
| rs4938616   | 11 | 118865465 | T | C | -1.233 | 0.2175 | -?- | 0      | 0.659 | 1 | 0.417   |
| rs79430446  | 11 | 72474004  | T | G | 1.229  | 0.2191 | ++  | 29.9   | 5.703 | 2 | 0.05777 |
| rs117346296 | 11 | 72025140  | A | G | 1.226  | 0.2202 | +?+ | 0      | 0.495 | 1 | 0.4817  |
| rs12273687  | 11 | 118852641 | T | G | -1.226 | 0.2203 | --- | 0      | 1     | 2 | 0.6065  |
| rs7938979   | 11 | 72021720  | C | G | 1.224  | 0.2209 | +?+ | 0      | 0.559 | 1 | 0.4546  |
| rs4936426   | 11 | 118134597 | C | T | 1.218  | 0.2232 | +?+ | 0      | 0.745 | 1 | 0.3881  |
| rs613937    | 11 | 72474839  | G | A | 1.217  | 0.2236 | -++ | 36.4   | 6.294 | 2 | 0.04299 |
| rs7125115   | 11 | 118478330 | A | G | 1.215  | 0.2242 | +++ | 0      | 0.559 | 2 | 0.7561  |
| rs528056    | 11 | 118317907 | T | C | 1.21   | 0.2264 | +++ | 0      | 0.844 | 2 | 0.6557  |

|             |    |           |   |   |        |        |     |        |       |   |         |
|-------------|----|-----------|---|---|--------|--------|-----|--------|-------|---|---------|
| rs74333814  | 11 | 72457487  | T | C | 1.207  | 0.2273 | ++  | 28.7   | 5.608 | 2 | 0.06056 |
| rs117237510 | 11 | 72009451  | T | C | 1.202  | 0.2295 | +?  | 0      | 0.627 | 1 | 0.4286  |
| rs4938604   | 11 | 118846574 | C | T | -1.201 | 0.2296 | -?  | 0      | 0.448 | 1 | 0.5031  |
| rs4938502   | 11 | 118179941 | T | G | -1.2   | 0.23   | --- | 0      | 0.32  | 2 | 0.8521  |
| rs12793150  | 11 | 118180667 | G | C | -1.199 | 0.2304 | --- | 0      | 0.32  | 2 | 0.8522  |
| rs117954624 | 11 | 72028005  | G | A | 1.197  | 0.2311 | +?  | 0      | 0.62  | 1 | 0.4311  |
| rs117999328 | 11 | 72019118  | C | T | 1.196  | 0.2318 | +?  | 0      | 0.617 | 1 | 0.4321  |
| rs118089225 | 11 | 72018472  | T | C | 1.196  | 0.2318 | +?  | 0      | 0.617 | 1 | 0.4321  |
| rs112337443 | 11 | 118530068 | C | T | 1.195  | 0.2321 | ++  | 0      | 1.762 | 2 | 0.4144  |
| rs4938605   | 11 | 118850707 | A | G | -1.193 | 0.233  | --- | 0      | 0.599 | 2 | 0.741   |
| rs7108613   | 11 | 118268613 | G | A | 1.19   | 0.234  | +++ | 0      | 0.313 | 2 | 0.8552  |
| rs503542    | 11 | 118590743 | G | A | 1.19   | 0.2341 | +-  | -41.4  | 2.829 | 2 | 0.243   |
| rs2071702   | 11 | 118373861 | T | C | 1.186  | 0.2355 | +?  | 0      | 0.407 | 1 | 0.5235  |
| rs3782041   | 11 | 118184092 | T | C | -1.182 | 0.2371 | --- | 0      | 0.272 | 2 | 0.873   |
| rs3741315   | 11 | 118004688 | A | G | 1.178  | 0.2387 | +-  | 0      | 1.767 | 2 | 0.4133  |
| rs12420418  | 11 | 118840857 | T | C | -1.177 | 0.2393 | --- | 0      | 0.192 | 2 | 0.9086  |
| rs3890562   | 11 | 118837113 | G | A | -1.174 | 0.2405 | --- | 0      | 0.205 | 2 | 0.9027  |
| rs116951669 | 11 | 72018759  | C | T | 1.174  | 0.2406 | +?  | 0      | 0.583 | 1 | 0.4452  |
| rs496058    | 11 | 118580906 | G | A | 1.167  | 0.2432 | +-  | -3.2   | 3.878 | 2 | 0.1439  |
| rs10892318  | 11 | 118848725 | A | G | -1.162 | 0.2452 | --- | 0      | 0.392 | 2 | 0.8219  |
| rs7103836   | 11 | 72474571  | C | G | 1.159  | 0.2466 | ++  | 27.1   | 5.49  | 2 | 0.06424 |
| rs2239695   | 11 | 118213632 | T | C | 1.158  | 0.247  | +++ | 0      | 0.67  | 2 | 0.7152  |
| rs58745438  | 11 | 118848315 | C | T | -1.154 | 0.2487 | --- | 0      | 0.397 | 2 | 0.82    |
| rs516503    | 11 | 118580348 | T | C | 1.15   | 0.25   | +-  | -2.7   | 3.896 | 2 | 0.1426  |
| rs3181259   | 11 | 118214067 | A | G | 1.15   | 0.2501 | +++ | 0      | 0.635 | 2 | 0.7278  |
| rs11217108  | 11 | 118841761 | T | C | -1.148 | 0.2509 | --- | 0      | 0.186 | 2 | 0.9114  |
| rs4938602   | 11 | 118846466 | A | G | -1.143 | 0.2529 | --- | 0      | 0.385 | 2 | 0.8251  |
| rs35865949  | 11 | 118229061 | A | T | 1.141  | 0.254  | +++ | 0      | 0.565 | 2 | 0.7538  |
| rs12795615  | 11 | 118214562 | T | C | 1.139  | 0.2548 | +++ | 0      | 0.576 | 2 | 0.7499  |
| rs7110197   | 11 | 118228624 | C | G | 1.138  | 0.255  | +++ | 0      | 0.555 | 2 | 0.7579  |
| rs1790191   | 11 | 118825636 | A | G | 1.138  | 0.2552 | +?  | 0      | 0.001 | 1 | 0.9797  |
| rs4938603   | 11 | 118846482 | G | A | -1.138 | 0.2553 | -?  | 0      | 0.253 | 1 | 0.6152  |
| rs3782046   | 11 | 118230739 | A | G | 1.136  | 0.2558 | +++ | 0      | 0.57  | 2 | 0.752   |
| rs3753060   | 11 | 118221137 | T | C | 1.133  | 0.2573 | +++ | 0      | 0.5   | 2 | 0.7788  |
| rs11216819  | 11 | 118084980 | G | A | 1.13   | 0.2584 | +?  | -109.3 | 1.433 | 1 | 0.2312  |
| rs939274    | 11 | 118134065 | T | G | 1.129  | 0.2591 | +?  | -126.5 | 1.325 | 1 | 0.2498  |
| rs3825054   | 11 | 118234191 | A | G | 1.128  | 0.2592 | +++ | 0      | 0.565 | 2 | 0.7538  |
| rs75040111  | 11 | 118747008 | T | C | -1.127 | 0.2596 | -+  | -34.8  | 2.966 | 2 | 0.2269  |
| rs3753059   | 11 | 118221349 | C | T | 1.126  | 0.2603 | +++ | 0      | 0.507 | 2 | 0.7761  |
| rs3753058   | 11 | 118221350 | T | G | 1.125  | 0.2604 | +++ | 0      | 0.507 | 2 | 0.776   |
| rs590580    | 11 | 118066104 | A | G | 1.124  | 0.2608 | +?  | -165.4 | 1.13  | 1 | 0.2877  |
| rs36061634  | 11 | 118225452 | A | T | 1.123  | 0.2612 | +++ | 0      | 0.57  | 2 | 0.7519  |
| rs45501598  | 11 | 118251980 | T | A | 1.121  | 0.2625 | +++ | 0      | 0.163 | 2 | 0.9217  |
| rs35305304  | 11 | 118228114 | T | C | 1.119  | 0.263  | +++ | 0      | 0.575 | 2 | 0.7502  |
| rs35902434  | 11 | 118222634 | C | T | 1.115  | 0.265  | +++ | 0      | 0.58  | 2 | 0.7482  |
| rs7949539   | 11 | 118250586 | G | A | 1.112  | 0.2664 | +++ | 0      | 0.157 | 2 | 0.9246  |
| rs494459    | 11 | 118574675 | T | C | 1.11   | 0.2671 | +-  | -4.4   | 3.83  | 2 | 0.1474  |
| rs12792929  | 11 | 118240715 | C | G | 1.105  | 0.269  | +++ | 0      | 0.469 | 2 | 0.7911  |
| rs626645    | 11 | 118575180 | C | T | 1.1    | 0.2714 | +-  | -5.6   | 3.788 | 2 | 0.1505  |
| rs60514290  | 11 | 118246048 | C | G | 1.099  | 0.2717 | +++ | 0      | 0.137 | 2 | 0.9337  |
| rs45474998  | 11 | 118229679 | A | G | 1.096  | 0.2729 | +++ | 0      | 0.459 | 2 | 0.795   |
| rs2276418   | 11 | 118230264 | T | A | 1.095  | 0.2734 | +++ | 0      | 0.46  | 2 | 0.7945  |
| rs524409    | 11 | 118574311 | T | C | 1.091  | 0.2751 | +-  | -1.8   | 3.929 | 2 | 0.1402  |
| rs7113731   | 11 | 118831824 | G | A | -1.091 | 0.2751 | --- | 0      | 0.351 | 2 | 0.8391  |

|             |    |           |   |   |        |        |     |       |       |   |         |
|-------------|----|-----------|---|---|--------|--------|-----|-------|-------|---|---------|
| rs186926311 | 11 | 118601426 | T | C | -1.088 | 0.2764 | --- | -85.5 | 2.157 | 2 | 0.3401  |
| rs2276421   | 11 | 118239266 | A | G | 1.087  | 0.2769 | +++ | 0     | 0.546 | 2 | 0.7611  |
| rs76126708  | 11 | 118259379 | C | A | 1.087  | 0.2771 | +++ | 0     | 0.162 | 2 | 0.9222  |
| rs34405565  | 11 | 118233424 | T | C | 1.087  | 0.2772 | +++ | 0     | 0.469 | 2 | 0.7909  |
| rs7940757   | 11 | 118055273 | T | C | 1.086  | 0.2775 | +++ | 0     | 0.408 | 2 | 0.8155  |
| rs4635088   | 11 | 118832924 | C | G | -1.084 | 0.2782 | --- | 0     | 0.351 | 2 | 0.8391  |
| rs647769    | 11 | 118812512 | T | C | 1.082  | 0.2791 | ++  | -49.5 | 2.675 | 2 | 0.2625  |
| rs59405103  | 11 | 118262305 | C | A | 1.081  | 0.2797 | +++ | 0     | 0.171 | 2 | 0.9182  |
| rs6589650   | 11 | 118055217 | C | T | 1.081  | 0.2798 | +++ | 0     | 0.408 | 2 | 0.8157  |
| rs11216804  | 11 | 118057320 | G | A | 1.079  | 0.2805 | +++ | 0     | 0.394 | 2 | 0.8212  |
| rs75461585  | 11 | 118287568 | G | A | -1.077 | 0.2816 | -?- | 0     | 0.093 | 1 | 0.7607  |
| rs77106637  | 11 | 72478320  | A | G | 1.076  | 0.2818 | ++  | 15.4  | 4.729 | 2 | 0.09399 |
| rs11217076  | 11 | 118745664 | G | T | 1.076  | 0.282  | +-  | 0     | 1.611 | 2 | 0.447   |
| rs3782045   | 11 | 118233078 | G | A | 1.076  | 0.282  | +++ | 0     | 0.479 | 2 | 0.7871  |
| rs625735    | 11 | 118575419 | A | G | 1.076  | 0.282  | +-  | -2.1  | 3.917 | 2 | 0.1411  |
| rs7944087   | 11 | 118055733 | T | C | 1.075  | 0.2824 | +++ | 0     | 0.395 | 2 | 0.8207  |
| rs76478216  | 11 | 118605352 | C | T | 1.075  | 0.2825 | +?- | -86.5 | 1.609 | 1 | 0.2046  |
| rs1613643   | 11 | 118068521 | T | G | 1.072  | 0.2836 | +?+ | 0     | 0.888 | 1 | 0.3461  |
| rs7944321   | 11 | 118055801 | A | G | 1.071  | 0.284  | +++ | 0     | 0.301 | 2 | 0.8603  |
| rs637563    | 11 | 118575479 | G | A | 1.071  | 0.2842 | +-  | -1.4  | 3.944 | 2 | 0.1392  |
| rs638514    | 11 | 118575693 | C | T | 1.07   | 0.2844 | +-  | -1.4  | 3.946 | 2 | 0.139   |
| rs61895726  | 11 | 72223735  | T | C | 1.068  | 0.2857 | +?+ | 0     | 0.721 | 1 | 0.3958  |
| rs530901    | 11 | 118575011 | C | T | 1.067  | 0.2859 | +-  | 1.6   | 4.064 | 2 | 0.1311  |
| rs647099    | 11 | 118067009 | A | G | 1.067  | 0.2861 | +?+ | 0     | 0.887 | 1 | 0.3463  |
| rs648947    | 11 | 118067426 | A | G | 1.066  | 0.2863 | +?+ | 0     | 0.892 | 1 | 0.3449  |
| rs76930336  | 11 | 118464764 | A | C | 1.065  | 0.2871 | ++  | -75.4 | 2.28  | 2 | 0.3198  |
| rs6589710   | 11 | 118837460 | T | A | -1.063 | 0.2877 | --- | 0     | 0.317 | 2 | 0.8534  |
| rs7931206   | 11 | 118056092 | C | T | 1.063  | 0.2878 | +++ | 0     | 0.4   | 2 | 0.8188  |
| rs576283    | 11 | 118573894 | G | A | 1.062  | 0.2882 | +-  | -0.2  | 3.992 | 2 | 0.1359  |
| rs7126476   | 11 | 118834784 | G | A | -1.062 | 0.2882 | --- | 0     | 0.309 | 2 | 0.8569  |
| rs71482156  | 11 | 118734516 | T | A | 1.06   | 0.2891 | +?+ | 0     | 0.004 | 1 | 0.9474  |
| rs7107756   | 11 | 118717708 | A | G | 1.06   | 0.2894 | ++  | -36.5 | 2.931 | 2 | 0.2309  |
| rs11216863  | 11 | 118257081 | A | G | -1.054 | 0.2921 | -?- | 0     | 0.095 | 1 | 0.7582  |
| rs57702967  | 11 | 118261736 | A | C | 1.052  | 0.2927 | +++ | 0     | 0.146 | 2 | 0.9298  |
| rs627391    | 11 | 118573916 | T | A | 1.049  | 0.294  | +-  | -1.7  | 3.934 | 2 | 0.1398  |
| rs61895701  | 11 | 72208039  | G | T | 1.049  | 0.2941 | +?+ | 0     | 0.676 | 1 | 0.4108  |
| rs7935561   | 11 | 118056722 | A | G | 1.048  | 0.2947 | +++ | 0     | 0.304 | 2 | 0.8588  |
| rs17122113  | 11 | 118234678 | G | A | 1.047  | 0.2949 | +++ | 0     | 0.525 | 2 | 0.7693  |
| rs11216920  | 11 | 118462554 | G | A | 1.044  | 0.2964 | ++  | 0     | 1.121 | 2 | 0.571   |
| rs648682    | 11 | 118066582 | T | C | 1.044  | 0.2966 | +?+ | 0     | 0.875 | 1 | 0.3495  |
| rs7131196   | 11 | 118265227 | C | T | -1.04  | 0.2982 | -?- | 0     | 0.214 | 1 | 0.6433  |
| rs951657    | 11 | 118067621 | A | G | 1.039  | 0.2988 | +?+ | 0     | 0.947 | 1 | 0.3305  |
| rs75017819  | 11 | 118285789 | G | A | -1.034 | 0.301  | -?- | 0     | 0.192 | 1 | 0.6616  |
| rs12295634  | 11 | 118054431 | T | C | 1.034  | 0.3013 | +++ | 0     | 0.3   | 2 | 0.8606  |
| rs59489957  | 11 | 118284984 | T | C | 1.033  | 0.3014 | +++ | 0     | 0.537 | 2 | 0.7645  |
| rs7112758   | 11 | 118836821 | A | G | -1.032 | 0.3019 | --- | 0     | 0.343 | 2 | 0.8424  |
| rs7116690   | 11 | 118837742 | G | A | -1.03  | 0.3029 | --- | 0     | 0.217 | 2 | 0.897   |
| rs45496391  | 11 | 118477226 | C | A | 1.03   | 0.3031 | +?+ | 0     | 0.075 | 1 | 0.7839  |
| rs3901422   | 11 | 118837272 | A | G | -1.029 | 0.3033 | --- | 0     | 0.219 | 2 | 0.8963  |
| rs61902060  | 11 | 118839828 | G | C | -1.028 | 0.3041 | --- | 0     | 0.218 | 2 | 0.8969  |
| rs2004235   | 11 | 118008212 | C | T | 1.026  | 0.3049 | ++  | 0     | 1.45  | 2 | 0.4844  |
| rs647573    | 11 | 118067132 | C | T | 1.025  | 0.3051 | +?+ | 0     | 0.865 | 1 | 0.3523  |
| rs11217107  | 11 | 118839268 | C | G | -1.025 | 0.3055 | --- | 0     | 0.218 | 2 | 0.8967  |
| rs4310630   | 11 | 118836638 | G | A | -1.023 | 0.3062 | --- | 0     | 0.352 | 2 | 0.8386  |

|             |    |           |   |   |        |        |     |        |       |   |         |
|-------------|----|-----------|---|---|--------|--------|-----|--------|-------|---|---------|
| rs3194726   | 11 | 118279936 | C | T | -1.02  | 0.3076 | -?- | 0      | 0.158 | 1 | 0.6911  |
| rs12274740  | 11 | 118054128 | C | T | 1.015  | 0.3099 | +++ | 0      | 0.308 | 2 | 0.8573  |
| rs74535623  | 11 | 118812821 | T | G | 1.014  | 0.3106 | ++  | 0      | 1.52  | 2 | 0.4676  |
| rs60798124  | 11 | 118282241 | G | A | 1.013  | 0.3108 | +++ | 0      | 0.608 | 2 | 0.7379  |
| rs11607835  | 11 | 118835258 | C | T | -1.013 | 0.3113 | --- | 0      | 0.354 | 2 | 0.8376  |
| rs61150131  | 11 | 118752178 | C | T | 1.012  | 0.3113 | +++ | 0      | 1.399 | 2 | 0.497   |
| rs7944366   | 11 | 118056047 | G | A | 1.011  | 0.3121 | +++ | 0      | 0.326 | 2 | 0.8496  |
| rs605908    | 11 | 118067192 | C | A | 1.009  | 0.3129 | +?+ | 0      | 0.803 | 1 | 0.3701  |
| rs61900159  | 11 | 118839133 | C | G | -1.007 | 0.3137 | --- | 0      | 0.236 | 2 | 0.8887  |
| rs904469    | 11 | 72324039  | A | G | 1.008  | 0.3137 | -?+ | -73.4  | 1.73  | 1 | 0.1884  |
| rs481206    | 11 | 72497462  | T | C | 1.007  | 0.314  | ++  | -21    | 3.306 | 2 | 0.1915  |
| rs7123835   | 11 | 118368822 | G | T | 1.007  | 0.314  | +?+ | 0      | 0.363 | 1 | 0.5471  |
| rs11216803  | 11 | 118057244 | A | C | 1.006  | 0.3145 | +++ | 0      | 0.328 | 2 | 0.8486  |
| rs11216802  | 11 | 118057227 | T | C | 1.005  | 0.3149 | +++ | 0      | 0.33  | 2 | 0.848   |
| rs1814964   | 11 | 118006957 | C | T | 1.003  | 0.3156 | ++  | 0      | 1.405 | 2 | 0.4952  |
| rs79092677  | 11 | 118265734 | G | T | -1.001 | 0.3166 | -?- | 0      | 0.173 | 1 | 0.6772  |
| rs73557345  | 11 | 118813314 | C | T | 1      | 0.3173 | ++  | 0      | 1.531 | 2 | 0.4651  |
| rs7107305   | 11 | 118368665 | G | A | 0.999  | 0.3178 | +?+ | 0      | 0.372 | 1 | 0.5417  |
| rs11216864  | 11 | 118260017 | T | C | -0.998 | 0.3182 | -?- | 0      | 0.085 | 1 | 0.7708  |
| rs755933    | 11 | 72325482  | A | G | 0.994  | 0.3204 | -?+ | -72.3  | 1.742 | 1 | 0.1869  |
| rs7940717   | 11 | 118055110 | T | G | 0.993  | 0.3209 | +++ | 0      | 0.307 | 2 | 0.8577  |
| rs10892237  | 11 | 118267763 | C | T | -0.99  | 0.3221 | -?- | 0      | 0.183 | 1 | 0.6689  |
| rs12795307  | 11 | 72506324  | A | G | 0.987  | 0.3235 | ++  | -15.7  | 3.458 | 2 | 0.1774  |
| rs653008    | 11 | 118520480 | T | G | 0.984  | 0.3251 | ++  | 0      | 0.927 | 2 | 0.6292  |
| rs7109575   | 11 | 72463435  | A | G | 0.98   | 0.3271 | ++  | 39.2   | 6.576 | 2 | 0.03733 |
| rs519790    | 11 | 72504141  | G | C | 0.98   | 0.3273 | ++  | -7.3   | 3.726 | 2 | 0.1552  |
| rs11604096  | 11 | 118012441 | C | A | -0.978 | 0.328  | -+- | 0      | 0.62  | 2 | 0.7336  |
| rs7103001   | 11 | 118367669 | T | A | 0.977  | 0.3285 | +?+ | 0      | 0.399 | 1 | 0.5274  |
| rs2276422   | 11 | 118263388 | G | C | -0.974 | 0.3299 | -?- | 0      | 0.197 | 1 | 0.6574  |
| rs117278652 | 11 | 72093901  | A | C | 0.973  | 0.3306 | -?+ | -51.7  | 1.978 | 1 | 0.1596  |
| rs2075647   | 11 | 118037964 | C | G | -0.973 | 0.3306 | -?- | 0      | 0.471 | 1 | 0.4927  |
| rs1624780   | 11 | 118134785 | T | G | 0.972  | 0.3311 | +?- | -180.9 | 1.068 | 1 | 0.3014  |
| rs17122150  | 11 | 118271860 | G | C | 0.972  | 0.3311 | +++ | 0      | 0.597 | 2 | 0.742   |
| rs12803321  | 11 | 118480115 | C | G | 0.97   | 0.3319 | +?+ | 0      | 0.327 | 1 | 0.5674  |
| rs77280285  | 11 | 118091258 | G | C | 0.969  | 0.3326 | +?+ | 0      | 0.4   | 1 | 0.5269  |
| rs497678    | 11 | 118567881 | C | T | 0.969  | 0.3327 | ++  | 0      | 1.803 | 2 | 0.4061  |
| rs10892253  | 11 | 118559426 | A | C | 0.968  | 0.3333 | +?+ | 0      | 0.06  | 1 | 0.8068  |
| rs56296109  | 11 | 118698170 | A | C | 0.965  | 0.3344 | -?+ | 22.8   | 3.886 | 1 | 0.04868 |
| rs601318    | 11 | 118519550 | G | C | 0.964  | 0.3348 | ++  | 0      | 0.91  | 2 | 0.6344  |
| rs639785    | 11 | 118062268 | T | C | 0.964  | 0.335  | +++ | 0      | 0.116 | 2 | 0.9437  |
| rs1623316   | 11 | 118757219 | G | C | 0.963  | 0.3355 | ++  | -90.5  | 2.1   | 2 | 0.35    |
| rs7110984   | 11 | 118442234 | A | G | 0.961  | 0.3365 | ++  | 0      | 1.975 | 2 | 0.3725  |
| rs117117171 | 11 | 118152252 | A | T | 0.959  | 0.3377 | +?+ | 0      | 0.059 | 1 | 0.8073  |
| rs7121764   | 11 | 118271759 | G | A | 0.95   | 0.3419 | +++ | 0      | 0.62  | 2 | 0.7333  |
| rs3181261   | 11 | 118212671 | T | C | 0.949  | 0.3428 | +?+ | 0      | 0.136 | 1 | 0.7126  |
| rs11603349  | 11 | 72460694  | C | T | 0.947  | 0.3437 | +++ | 36.8   | 6.327 | 2 | 0.04227 |
| rs117794131 | 11 | 72097791  | C | T | 0.946  | 0.3439 | -?+ | -57.6  | 1.904 | 1 | 0.1677  |
| rs623500    | 11 | 118828942 | G | A | 0.944  | 0.3454 | +?- | -65.5  | 1.813 | 1 | 0.1782  |
| rs11216867  | 11 | 118262407 | G | A | 0.943  | 0.3458 | +++ | 0      | 0.538 | 2 | 0.7643  |
| rs663015    | 11 | 72499035  | C | T | 0.942  | 0.346  | ++  | -16.9  | 3.42  | 2 | 0.1808  |
| rs6589673   | 11 | 118557483 | C | A | 0.942  | 0.3461 | +?+ | 0      | 0.048 | 1 | 0.8265  |
| rs7103366   | 11 | 118057867 | G | T | 0.94   | 0.3473 | +++ | 0      | 0.076 | 2 | 0.9626  |
| rs75085081  | 11 | 118801045 | A | G | 0.935  | 0.3499 | ++  | 0      | 1.855 | 2 | 0.3955  |
| rs1791936   | 11 | 72877964  | G | A | -0.933 | 0.3508 | --- | 0      | 0.245 | 2 | 0.8849  |

|             |    |           |   |   |        |        |     |        |       |   |         |
|-------------|----|-----------|---|---|--------|--------|-----|--------|-------|---|---------|
| rs3781934   | 11 | 72325070  | A | G | 0.933  | 0.3509 | -?+ | -83.7  | 1.633 | 1 | 0.2013  |
| rs668468    | 11 | 118011776 | G | A | -0.932 | 0.3515 | -+- | 0      | 0.643 | 2 | 0.725   |
| rs73016221  | 11 | 118220027 | C | T | -0.926 | 0.3543 | -?- | 0      | 0.502 | 1 | 0.4786  |
| rs76675432  | 11 | 118103976 | T | C | 0.926  | 0.3546 | +?+ | 0      | 0.38  | 1 | 0.5378  |
| rs11602873  | 11 | 72460762  | T | A | 0.92   | 0.3577 | -++ | 31.7   | 5.861 | 2 | 0.05338 |
| rs73003294  | 11 | 118661376 | T | C | 0.919  | 0.3581 | -?+ | 30.1   | 4.293 | 1 | 0.03827 |
| rs77464186  | 11 | 72460398  | C | A | 0.918  | 0.3584 | -++ | 31.7   | 5.854 | 2 | 0.05356 |
| rs117822540 | 11 | 72123996  | C | T | 0.916  | 0.3597 | -?+ | -75.3  | 1.711 | 1 | 0.1909  |
| rs17122154  | 11 | 118273019 | A | G | 0.913  | 0.3611 | +++ | 0      | 0.652 | 2 | 0.7218  |
| rs9332809   | 11 | 118361472 | A | G | 0.91   | 0.363  | +?+ | 0      | 0.213 | 1 | 0.6447  |
| rs117190635 | 11 | 72104119  | A | G | 0.905  | 0.3652 | -?+ | -90.1  | 1.578 | 1 | 0.2091  |
| rs2276045   | 11 | 118365168 | A | G | 0.899  | 0.3685 | +?+ | 0      | 0.268 | 1 | 0.605   |
| rs1793170   | 11 | 118150205 | C | T | -0.899 | 0.3686 | +-- | 0      | 0.701 | 2 | 0.7045  |
| rs6589663   | 11 | 118255278 | A | G | 0.896  | 0.3703 | +++ | 0      | 0.655 | 2 | 0.7208  |
| rs619250    | 11 | 118064582 | A | T | 0.896  | 0.3704 | +?+ | 0      | 0.771 | 1 | 0.3798  |
| rs7116876   | 11 | 118371025 | C | G | 0.896  | 0.3705 | +?+ | 0      | 0.271 | 1 | 0.6024  |
| rs3781931   | 11 | 72327205  | T | C | 0.895  | 0.3707 | -?+ | -101.1 | 1.492 | 1 | 0.222   |
| rs3212262   | 11 | 118217854 | T | G | -0.893 | 0.372  | -?- | 0      | 0.551 | 1 | 0.458   |
| rs9332819   | 11 | 118365263 | T | C | 0.891  | 0.373  | +?+ | 0      | 0.248 | 1 | 0.6186  |
| rs562780    | 11 | 118362414 | T | C | 0.89   | 0.3733 | -++ | 0      | 0.856 | 2 | 0.6517  |
| rs10790240  | 11 | 118009279 | G | T | 0.889  | 0.3738 | ++  | 0      | 1.103 | 2 | 0.5762  |
| rs9332835   | 11 | 118372923 | A | G | 0.887  | 0.3748 | +?+ | 0      | 0.28  | 1 | 0.5967  |
| rs11217077  | 11 | 118746223 | C | T | 0.885  | 0.3762 | ++  | 0      | 1.761 | 2 | 0.4145  |
| rs7933243   | 11 | 118403205 | G | T | 0.882  | 0.3778 | ++  | 0      | 0.752 | 2 | 0.6866  |
| rs7109466   | 11 | 72114792  | T | C | 0.879  | 0.3796 | -?+ | -67.4  | 1.792 | 1 | 0.1807  |
| rs12290522  | 11 | 118486325 | T | C | 0.876  | 0.3811 | ++  | 0      | 0.92  | 2 | 0.6312  |
| rs12788624  | 11 | 118022107 | T | C | -0.876 | 0.3811 | -++ | -22.4  | 3.269 | 2 | 0.1951  |
| rs2276419   | 11 | 118230359 | T | C | -0.875 | 0.3813 | -?- | 0      | 0.589 | 1 | 0.4429  |
| rs10790254  | 11 | 118493319 | A | G | 0.874  | 0.3819 | +?+ | 0      | 0     | 1 | 0.9977  |
| rs6589651   | 11 | 118058156 | G | A | 0.874  | 0.3822 | +++ | 0      | 0.057 | 2 | 0.9721  |
| rs56754533  | 11 | 118188276 | A | G | -0.872 | 0.3833 | -?- | 0      | 0.551 | 1 | 0.4578  |
| rs9332846   | 11 | 118377523 | A | G | 0.872  | 0.3835 | +?+ | 0      | 0.197 | 1 | 0.6569  |
| rs17121871  | 11 | 118073344 | T | C | 0.871  | 0.3839 | +?+ | 0      | 0.435 | 1 | 0.5095  |
| rs113399762 | 11 | 118389698 | C | T | 0.867  | 0.3858 | +?+ | 0      | 0.35  | 1 | 0.5541  |
| rs116881498 | 11 | 72102819  | T | C | 0.866  | 0.3867 | -?+ | -73.5  | 1.729 | 1 | 0.1885  |
| rs147710683 | 11 | 118121356 | T | C | -0.865 | 0.387  | -?- | 0      | 0.486 | 1 | 0.4857  |
| rs79826955  | 11 | 72104081  | A | G | 0.865  | 0.387  | -?+ | -73.7  | 1.728 | 1 | 0.1887  |
| rs55768116  | 11 | 118108331 | A | C | -0.864 | 0.3877 | -?- | 0      | 0.329 | 1 | 0.5664  |
| rs7113994   | 11 | 118382327 | G | A | 0.861  | 0.389  | +?+ | 0      | 0.26  | 1 | 0.6103  |
| rs1616199   | 11 | 118146462 | T | C | -0.856 | 0.3918 | +-- | 0      | 0.636 | 2 | 0.7277  |
| rs1783587   | 11 | 72887612  | C | T | -0.855 | 0.3926 | ++  | 9.5    | 4.421 | 2 | 0.1097  |
| rs1632118   | 11 | 72881636  | T | C | -0.855 | 0.3928 | -+- | -44.8  | 2.762 | 2 | 0.2513  |
| rs7113959   | 11 | 118379096 | A | T | 0.853  | 0.3935 | +?+ | 0      | 0.268 | 1 | 0.6047  |
| rs45621436  | 11 | 118483912 | G | T | 0.853  | 0.3938 | +?+ | 0      | 0.005 | 1 | 0.9438  |
| rs6589652   | 11 | 118058358 | G | A | 0.853  | 0.3938 | +++ | 0      | 0.045 | 2 | 0.9779  |
| rs527290    | 11 | 118515616 | T | C | 0.851  | 0.3948 | ++  | 0      | 1.042 | 2 | 0.594   |
| rs1171461   | 11 | 118522179 | A | G | 0.85   | 0.3952 | ++  | 0      | 0.874 | 2 | 0.646   |
| rs146305387 | 11 | 118426800 | T | C | -0.849 | 0.3957 | -?+ | -177.2 | 1.082 | 1 | 0.2982  |
| rs117654328 | 11 | 72117713  | A | G | 0.849  | 0.3961 | -?+ | -75.2  | 1.712 | 1 | 0.1907  |
| rs150031150 | 11 | 72120370  | A | G | 0.849  | 0.3961 | -?+ | -75.2  | 1.712 | 1 | 0.1907  |
| rs1715444   | 11 | 118016273 | G | T | -0.846 | 0.3976 | -+- | 0      | 0.369 | 2 | 0.8316  |
| rs724673    | 11 | 72795708  | A | G | 0.838  | 0.4018 | -++ | -51.5  | 2.64  | 2 | 0.2672  |
| rs4938520   | 11 | 118522338 | G | A | 0.838  | 0.4021 | ++  | 0      | 0.787 | 2 | 0.6747  |
| rs117235147 | 11 | 72115430  | A | T | 0.838  | 0.4023 | -?+ | -78.2  | 1.684 | 1 | 0.1944  |

|             |    |           |   |   |        |        |     |        |       |   |        |
|-------------|----|-----------|---|---|--------|--------|-----|--------|-------|---|--------|
| rs4553405   | 11 | 118061798 | T | C | 0.837  | 0.4026 | +++ | 0      | 0.043 | 2 | 0.9785 |
| rs9332816   | 11 | 118364404 | T | G | 0.836  | 0.4029 | +?+ | 0      | 0.349 | 1 | 0.5545 |
| rs149668068 | 11 | 118099735 | A | G | -0.835 | 0.4039 | -?- | 0      | 0.358 | 1 | 0.5494 |
| rs2003368   | 11 | 72840106  | T | C | 0.832  | 0.4056 | -++ | -40.4  | 2.848 | 2 | 0.2407 |
| rs550999    | 11 | 118811684 | G | C | 0.83   | 0.4068 | +-+ | -3.7   | 3.856 | 2 | 0.1454 |
| rs148643334 | 11 | 118358152 | C | T | 0.826  | 0.4087 | +?+ | 0      | 0.42  | 1 | 0.517  |
| rs45460493  | 11 | 118455465 | A | G | 0.825  | 0.4093 | +?+ | 0      | 0.002 | 1 | 0.9689 |
| rs745663    | 11 | 118529595 | G | A | 0.823  | 0.4104 | ++- | 0      | 0.771 | 2 | 0.68   |
| rs111997050 | 11 | 118387892 | T | C | 0.815  | 0.4149 | +?+ | 0      | 0.103 | 1 | 0.748  |
| rs67514601  | 11 | 118189477 | G | A | -0.814 | 0.4155 | -?- | 0      | 0.393 | 1 | 0.531  |
| rs11235641  | 11 | 72755766  | A | G | 0.814  | 0.4159 | -++ | -39.8  | 2.861 | 2 | 0.2392 |
| rs56083337  | 11 | 118131813 | T | A | -0.812 | 0.4168 | -?+ | 0      | 0.755 | 1 | 0.385  |
| rs78020509  | 11 | 118384811 | G | A | 0.809  | 0.4186 | +?+ | 0      | 0.299 | 1 | 0.5842 |
| rs117068828 | 11 | 72139241  | A | G | 0.809  | 0.4188 | -?+ | -86.4  | 1.609 | 1 | 0.2046 |
| rs111405302 | 11 | 118385691 | C | T | 0.808  | 0.4189 | +?+ | 0      | 0.313 | 1 | 0.5759 |
| rs7389      | 11 | 118528466 | G | T | 0.806  | 0.4202 | ++- | 0      | 0.856 | 2 | 0.6519 |
| rs9332858   | 11 | 118390082 | C | A | 0.803  | 0.422  | +?+ | 0      | 0.255 | 1 | 0.6135 |
| rs4420279   | 11 | 118835677 | A | C | 0.801  | 0.4233 | -?+ | -33.1  | 2.253 | 1 | 0.1333 |
| rs117532939 | 11 | 72165516  | G | A | 0.798  | 0.4246 | -?+ | -121.3 | 1.355 | 1 | 0.2443 |
| rs117817588 | 11 | 72166041  | T | G | 0.798  | 0.4246 | -?+ | -121.3 | 1.355 | 1 | 0.2443 |
| rs570836    | 11 | 118512162 | A | G | 0.797  | 0.4255 | ++- | 0      | 0.968 | 2 | 0.6163 |
| rs1513780   | 11 | 72320500  | T | G | 0.795  | 0.4267 | -?+ | -76.9  | 1.696 | 1 | 0.1928 |
| rs630923    | 11 | 118754353 | A | C | 0.795  | 0.4269 | ++  | -87.7  | 2.131 | 2 | 0.3445 |
| rs12419204  | 11 | 118497402 | A | T | 0.793  | 0.428  | ++- | 0      | 0.921 | 2 | 0.6309 |
| rs4944563   | 11 | 72316881  | C | A | 0.79   | 0.4294 | -?+ | -76.9  | 1.695 | 1 | 0.1929 |
| rs45460396  | 11 | 118005622 | G | T | -0.789 | 0.4299 | -+- | 0      | 0.731 | 2 | 0.6939 |
| rs10790257  | 11 | 118561858 | C | G | 0.787  | 0.4312 | +?+ | 0      | 0.004 | 1 | 0.9488 |
| rs10790258  | 11 | 118561859 | T | G | 0.787  | 0.4312 | +?+ | 0      | 0.004 | 1 | 0.9488 |
| rs4938517   | 11 | 118487673 | C | T | 0.784  | 0.4329 | ++- | 0      | 1.083 | 2 | 0.582  |
| rs4944566   | 11 | 72321872  | A | G | 0.782  | 0.4341 | -?+ | -90.3  | 1.577 | 1 | 0.2093 |
| rs649138    | 11 | 118066695 | C | T | 0.778  | 0.4363 | +?+ | 0      | 0.444 | 1 | 0.505  |
| rs45584835  | 11 | 118004863 | G | A | -0.778 | 0.4365 | -+- | 0      | 0.699 | 2 | 0.7049 |
| rs483283    | 11 | 118506402 | C | T | 0.778  | 0.4365 | ++- | 0      | 0.964 | 2 | 0.6174 |
| rs11603616  | 11 | 118496066 | A | G | 0.776  | 0.4375 | ++- | 0      | 0.987 | 2 | 0.6105 |
| rs1793185   | 11 | 118089434 | A | C | 0.776  | 0.4375 | +?- | 0      | 0.925 | 1 | 0.3363 |
| rs9332871   | 11 | 118393856 | T | G | 0.776  | 0.4377 | +?+ | 0      | 0.122 | 1 | 0.7271 |
| rs11235550  | 11 | 72331050  | C | T | 0.776  | 0.4378 | +?+ | 0      | 0     | 1 | 0.9822 |
| rs868344    | 11 | 118005119 | C | T | -0.776 | 0.4378 | -+- | 0      | 0.687 | 2 | 0.7094 |
| rs570952    | 11 | 118500193 | C | T | 0.775  | 0.4384 | ++- | 0      | 0.909 | 2 | 0.6348 |
| rs9332857   | 11 | 118389440 | T | C | 0.775  | 0.4385 | +?+ | 0      | 0.127 | 1 | 0.7215 |
| rs9332852   | 11 | 118381069 | T | C | 0.773  | 0.4395 | +?+ | 0      | 0.161 | 1 | 0.6885 |
| rs9332851   | 11 | 118381018 | T | C | 0.77   | 0.4411 | +?+ | 0      | 0.172 | 1 | 0.6783 |
| rs2231439   | 11 | 118174885 | G | A | -0.77  | 0.4412 | -?- | 0      | 0.587 | 1 | 0.4436 |
| rs67533649  | 11 | 118835272 | G | A | 0.767  | 0.4432 | -?+ | -51.4  | 1.981 | 1 | 0.1593 |
| rs458360    | 11 | 72319522  | A | C | 0.766  | 0.4435 | -?+ | -39.6  | 2.148 | 1 | 0.1427 |
| rs462491    | 11 | 72319520  | C | T | 0.766  | 0.4435 | -?+ | -39.6  | 2.148 | 1 | 0.1427 |
| rs571001    | 11 | 118500173 | T | C | 0.765  | 0.4442 | ++- | 0      | 0.961 | 2 | 0.6184 |
| rs7103936   | 11 | 118091636 | C | A | 0.765  | 0.4442 | +?- | -166.1 | 1.128 | 1 | 0.2883 |
| rs150339153 | 11 | 118285369 | T | C | -0.763 | 0.4454 | -?- | 0      | 0.141 | 1 | 0.7076 |
| rs2231449   | 11 | 118186305 | A | C | -0.76  | 0.4474 | -+- | -52.3  | 2.627 | 2 | 0.2689 |
| rs4938490   | 11 | 118080977 | G | A | 0.758  | 0.4483 | +?+ | 0      | 0.455 | 1 | 0.4998 |
| rs605560    | 11 | 118067187 | C | G | 0.755  | 0.4505 | +?+ | 0      | 0.414 | 1 | 0.5201 |
| rs2077173   | 11 | 118492591 | A | G | 0.753  | 0.4512 | ++- | 0      | 1.067 | 2 | 0.5866 |
| rs11216843  | 11 | 118151329 | T | A | -0.752 | 0.4521 | -+- | 0      | 1.722 | 2 | 0.4228 |

|             |    |           |   |   |        |        |     |        |       |   |         |
|-------------|----|-----------|---|---|--------|--------|-----|--------|-------|---|---------|
| rs10790244  | 11 | 118059557 | C | T | 0.747  | 0.455  | +++ | 0      | 0.021 | 2 | 0.9896  |
| rs4938595   | 11 | 118832582 | T | G | 0.746  | 0.4556 | -?+ | -37.3  | 2.184 | 1 | 0.1394  |
| rs146523897 | 11 | 72161854  | A | G | 0.745  | 0.456  | -?+ | -93.7  | 1.549 | 1 | 0.2133  |
| rs11216848  | 11 | 118181481 | A | C | -0.743 | 0.4574 | -+- | -85.2  | 2.16  | 2 | 0.3397  |
| rs2120268   | 11 | 118132705 | A | G | 0.74   | 0.4591 | +?- | 0      | 0.935 | 1 | 0.3335  |
| rs382163    | 11 | 72292796  | T | C | 0.74   | 0.4591 | -?+ | 0      | 0.907 | 1 | 0.341   |
| rs11216822  | 11 | 118091375 | A | G | 0.74   | 0.4596 | +?- | -153.7 | 1.182 | 1 | 0.2768  |
| rs2097183   | 11 | 118091067 | T | C | 0.739  | 0.4596 | +?- | -153.7 | 1.183 | 1 | 0.2768  |
| rs668628    | 11 | 118519213 | T | G | 0.736  | 0.4619 | +?- | 48.3   | 5.797 | 1 | 0.01605 |
| rs341085    | 11 | 72318882  | A | C | 0.73   | 0.4651 | -?+ | -37.2  | 2.186 | 1 | 0.1393  |
| rs17121881  | 11 | 118081345 | A | T | 0.73   | 0.4656 | +?+ | 0      | 0.49  | 1 | 0.4838  |
| rs673770    | 11 | 118550601 | G | T | 0.729  | 0.4658 | ++- | -55.4  | 2.574 | 2 | 0.276   |
| rs145968026 | 11 | 118421841 | G | C | 0.729  | 0.4661 | +?+ | 0      | 0.018 | 1 | 0.8924  |
| rs17121879  | 11 | 118080133 | G | T | 0.726  | 0.4676 | +?+ | 0      | 0.432 | 1 | 0.511   |
| rs4938489   | 11 | 118079867 | G | T | 0.726  | 0.468  | +?+ | 0      | 0.433 | 1 | 0.5106  |
| rs111227443 | 11 | 118590961 | T | C | 0.725  | 0.4684 | -?+ | -47.8  | 2.03  | 1 | 0.1543  |
| rs592280    | 11 | 118553218 | C | T | 0.725  | 0.4686 | ++- | -61.9  | 2.471 | 2 | 0.2907  |
| rs11600544  | 11 | 118076954 | C | G | 0.724  | 0.469  | +?+ | 0      | 0.417 | 1 | 0.5186  |
| rs111656195 | 11 | 118301375 | A | G | 0.724  | 0.4693 | +?- | 0      | 0.612 | 1 | 0.434   |
| rs59776769  | 11 | 72296353  | A | G | 0.724  | 0.4693 | -?+ | 0      | 0.591 | 1 | 0.4421  |
| rs1793167   | 11 | 118102058 | T | C | 0.723  | 0.4697 | +?- | -115.9 | 1.39  | 1 | 0.2385  |
| rs1805      | 11 | 118076069 | T | G | 0.722  | 0.4704 | +?+ | 0      | 0.45  | 1 | 0.5024  |
| rs151127828 | 11 | 118206121 | A | G | 0.721  | 0.4709 | +?+ | 0      | 0.002 | 1 | 0.9662  |
| rs17121882  | 11 | 118081468 | C | T | 0.721  | 0.4712 | +?+ | 0      | 0.47  | 1 | 0.4932  |
| rs76457018  | 11 | 118762701 | A | G | -0.718 | 0.4731 | ++- | 0      | 0.678 | 2 | 0.7126  |
| rs642497    | 11 | 118550784 | A | C | 0.715  | 0.4747 | ++- | -56.3  | 2.559 | 2 | 0.2782  |
| rs645637    | 11 | 118505090 | A | G | 0.713  | 0.4757 | ++- | 0      | 1.015 | 2 | 0.6019  |
| rs4331144   | 11 | 118554100 | G | A | 0.707  | 0.4795 | ++- | -46.8  | 2.725 | 2 | 0.256   |
| rs12799314  | 11 | 118551597 | A | G | 0.705  | 0.4809 | ++- | -53.6  | 2.604 | 2 | 0.272   |
| rs171021    | 11 | 72317557  | T | C | 0.703  | 0.4819 | -?+ | -157.7 | 1.164 | 1 | 0.2806  |
| rs667982    | 11 | 118562767 | C | T | 0.703  | 0.4822 | ++- | -53.3  | 2.609 | 2 | 0.2714  |
| rs586370    | 11 | 118816353 | A | G | -0.703 | 0.4823 | -?- | 0      | 0.292 | 1 | 0.5892  |
| rs112636863 | 11 | 118333510 | C | T | 0.701  | 0.4835 | +?+ | 0      | 0.422 | 1 | 0.516   |
| rs642530    | 11 | 118550756 | C | T | 0.699  | 0.4843 | ++- | -54.1  | 2.595 | 2 | 0.2732  |
| rs61900158  | 11 | 118831764 | A | T | 0.699  | 0.4849 | -?+ | -52.2  | 1.971 | 1 | 0.1603  |
| rs4936433   | 11 | 118552420 | G | A | 0.697  | 0.4857 | ++- | -54.2  | 2.594 | 2 | 0.2734  |
| rs7106652   | 11 | 118554248 | T | C | 0.697  | 0.4858 | ++- | -49.7  | 2.673 | 2 | 0.2628  |
| rs7106851   | 11 | 118554259 | A | G | 0.697  | 0.4858 | ++- | -50.2  | 2.663 | 2 | 0.2641  |
| rs600969    | 11 | 118545797 | T | C | 0.697  | 0.4859 | ++- | -51.5  | 2.64  | 2 | 0.2671  |
| rs1806      | 11 | 118076004 | C | T | 0.696  | 0.4863 | +?- | 0      | 0.747 | 1 | 0.3874  |
| rs111903103 | 11 | 118308499 | T | C | 0.694  | 0.4876 | +?+ | 0      | 0.472 | 1 | 0.4922  |
| rs11602869  | 11 | 118554448 | A | G | 0.693  | 0.4884 | ++- | -47.5  | 2.711 | 2 | 0.2578  |
| rs11605069  | 11 | 118554436 | G | T | 0.69   | 0.49   | ++- | -49.2  | 2.682 | 2 | 0.2616  |
| rs11216806  | 11 | 118060549 | C | T | 0.69   | 0.4901 | +++ | 0      | 0.062 | 2 | 0.9695  |
| rs1793155   | 11 | 118098962 | A | G | 0.689  | 0.4909 | +?- | -109.4 | 1.433 | 1 | 0.2313  |
| rs12796373  | 11 | 118554939 | A | G | 0.689  | 0.4911 | ++- | -46.5  | 2.731 | 2 | 0.2552  |
| rs12280559  | 11 | 118087040 | T | C | 0.688  | 0.4916 | +?- | -131.2 | 1.298 | 1 | 0.2546  |
| rs656575    | 11 | 118549908 | G | T | 0.688  | 0.4917 | ++- | -75.7  | 2.276 | 2 | 0.3204  |
| rs507080    | 11 | 118549582 | A | G | 0.686  | 0.4925 | ++- | -77.8  | 2.25  | 2 | 0.3246  |
| rs562313    | 11 | 118548421 | A | G | 0.686  | 0.493  | ++- | -48.6  | 2.691 | 2 | 0.2604  |
| rs549370    | 11 | 118552842 | A | C | 0.684  | 0.4939 | ++- | -50.8  | 2.653 | 2 | 0.2655  |
| rs543413    | 11 | 118550017 | C | T | 0.683  | 0.4944 | ++- | -76.8  | 2.263 | 2 | 0.3226  |
| rs3018383   | 11 | 118093359 | A | C | 0.683  | 0.4947 | +?- | -107.3 | 1.447 | 1 | 0.229   |
| rs111354396 | 11 | 118296184 | A | G | 0.682  | 0.4953 | +?- | 0      | 0.693 | 1 | 0.4052  |

|             |    |           |   |   |        |        |     |        |       |   |         |
|-------------|----|-----------|---|---|--------|--------|-----|--------|-------|---|---------|
| rs1793156   | 11 | 118098890 | C | T | 0.682  | 0.4954 | +?- | -107   | 1.45  | 1 | 0.2286  |
| rs11216781  | 11 | 118012310 | A | G | 0.681  | 0.496  | +++ | 0      | 0.047 | 2 | 0.977   |
| rs4938524   | 11 | 118552074 | T | G | 0.681  | 0.4961 | ++- | -48.9  | 2.686 | 2 | 0.2611  |
| rs654792    | 11 | 118552996 | T | G | 0.68   | 0.4964 | ++- | -49.8  | 2.671 | 2 | 0.2631  |
| rs111763202 | 11 | 118289734 | T | C | 0.68   | 0.4967 | +?- | 0      | 0.696 | 1 | 0.404   |
| rs112035668 | 11 | 118290443 | G | A | 0.679  | 0.4973 | +?- | 0      | 0.698 | 1 | 0.4034  |
| rs56210510  | 11 | 72333342  | C | T | 0.679  | 0.4973 | -?+ | -87    | 1.604 | 1 | 0.2054  |
| rs111901186 | 11 | 118328052 | G | A | 0.679  | 0.4974 | +?- | 0      | 0.478 | 1 | 0.4895  |
| rs7103918   | 11 | 118061480 | T | C | 0.678  | 0.498  | +++ | 0      | 0.015 | 2 | 0.9926  |
| rs519848    | 11 | 118552715 | A | G | 0.677  | 0.4985 | ++- | -48.9  | 2.686 | 2 | 0.2611  |
| rs112302730 | 11 | 118283383 | A | G | 0.676  | 0.4988 | +?- | 0      | 0.702 | 1 | 0.4021  |
| rs543327    | 11 | 118549985 | T | G | 0.675  | 0.4996 | ++- | -74.1  | 2.297 | 2 | 0.3171  |
| rs112550735 | 11 | 118303200 | C | T | 0.674  | 0.5001 | +?- | 0      | 0.738 | 1 | 0.3902  |
| rs11606719  | 11 | 118782474 | G | C | 0.674  | 0.5004 | ++- | 0      | 1.884 | 2 | 0.3898  |
| rs1784298   | 11 | 118548665 | C | T | 0.674  | 0.5004 | ++- | -73.7  | 2.303 | 2 | 0.3162  |
| rs77728961  | 11 | 118303182 | C | T | 0.674  | 0.5004 | +?- | 0      | 0.739 | 1 | 0.39    |
| rs12575015  | 11 | 118197645 | T | A | -0.674 | 0.5006 | -?- | 0      | 0.084 | 1 | 0.7716  |
| rs4938522   | 11 | 118548671 | T | A | 0.673  | 0.5012 | ++- | -73.3  | 2.308 | 2 | 0.3154  |
| rs55861597  | 11 | 72331873  | T | G | 0.672  | 0.5019 | -?+ | -127.3 | 1.32  | 1 | 0.2506  |
| rs55738331  | 11 | 72331821  | T | C | 0.67   | 0.5028 | -?+ | -127.8 | 1.317 | 1 | 0.2512  |
| rs141752759 | 11 | 118194647 | G | C | 0.67   | 0.503  | +?+ | 0      | 0     | 1 | 1       |
| rs10736494  | 11 | 118518227 | T | C | 0.669  | 0.5033 | +?+ | 0      | 0.274 | 1 | 0.6005  |
| rs67435655  | 11 | 118196399 | C | T | -0.665 | 0.5059 | -?- | 0      | 0.089 | 1 | 0.7652  |
| rs66962317  | 11 | 118197486 | C | T | -0.664 | 0.5065 | -?- | 0      | 0.09  | 1 | 0.7645  |
| rs12418930  | 11 | 72681566  | T | C | 0.663  | 0.5076 | ++- | -12.7  | 3.549 | 2 | 0.1696  |
| rs117493218 | 11 | 118027406 | C | A | 0.661  | 0.5084 | --+ | 0      | 1.311 | 2 | 0.5191  |
| rs659969    | 11 | 118549803 | T | C | 0.661  | 0.5085 | ++- | -69.8  | 2.356 | 2 | 0.308   |
| rs11216846  | 11 | 118163916 | A | G | -0.659 | 0.51   | -+- | 0      | 1.757 | 2 | 0.4154  |
| rs563549    | 11 | 118558953 | A | G | 0.653  | 0.5139 | ++- | -47.3  | 2.716 | 2 | 0.2572  |
| rs3802863   | 11 | 118099186 | T | C | 0.653  | 0.5141 | +?- | -73.2  | 1.732 | 1 | 0.1881  |
| rs4938523   | 11 | 118548838 | T | G | 0.652  | 0.5142 | ++- | -67.1  | 2.393 | 2 | 0.3022  |
| rs509641    | 11 | 118558952 | C | T | 0.652  | 0.5142 | ++- | -47.2  | 2.717 | 2 | 0.257   |
| rs112245679 | 11 | 118287622 | G | A | 0.652  | 0.5143 | +?- | 0      | 0.743 | 1 | 0.3887  |
| rs112563022 | 11 | 118262135 | T | C | 0.652  | 0.5144 | +?- | 0      | 0.86  | 1 | 0.3536  |
| rs67859744  | 11 | 118200657 | A | T | -0.652 | 0.5145 | -?- | 0      | 0.097 | 1 | 0.7549  |
| rs113028342 | 11 | 118333537 | G | A | 0.651  | 0.5153 | +?+ | 0      | 0.313 | 1 | 0.5757  |
| rs45627033  | 11 | 118766018 | T | C | 0.647  | 0.5177 | +?- | -29.7  | 2.313 | 1 | 0.1283  |
| rs510408    | 11 | 118558901 | C | G | 0.647  | 0.5179 | ++- | -48.9  | 2.686 | 2 | 0.2611  |
| rs55843215  | 11 | 118195962 | C | T | -0.645 | 0.5191 | -?- | 0      | 0.102 | 1 | 0.7496  |
| rs392565    | 11 | 72290629  | A | G | 0.645  | 0.5192 | -?+ | 0      | 0.737 | 1 | 0.3905  |
| rs143605660 | 11 | 118707035 | A | G | 0.644  | 0.5194 | -?+ | -10    | 2.728 | 1 | 0.09862 |
| rs6589656   | 11 | 118095996 | C | G | 0.644  | 0.5196 | +?- | -70.9  | 1.755 | 1 | 0.1852  |
| rs638805    | 11 | 118558889 | T | G | 0.644  | 0.5198 | ++- | -48.2  | 2.699 | 2 | 0.2593  |
| rs1617182   | 11 | 118068949 | C | T | 0.637  | 0.524  | +?- | 0      | 0.511 | 1 | 0.4747  |
| rs73612281  | 11 | 118203642 | T | C | -0.635 | 0.5255 | -?- | 0      | 0.108 | 1 | 0.7422  |
| rs111993696 | 11 | 118282448 | A | G | 0.634  | 0.5258 | +?- | 0      | 0.774 | 1 | 0.379   |
| rs4938505   | 11 | 118205636 | A | G | -0.634 | 0.526  | -?- | 0      | 0.109 | 1 | 0.7416  |
| rs12801084  | 11 | 72991793  | G | C | -0.632 | 0.5276 | --+ | -8.2   | 3.696 | 2 | 0.1576  |
| rs558781    | 11 | 118564397 | T | G | 0.63   | 0.5284 | ++- | -65.1  | 2.423 | 2 | 0.2977  |
| rs514143    | 11 | 118558449 | A | G | 0.63   | 0.5287 | ++- | -65.5  | 2.417 | 2 | 0.2986  |
| rs112583389 | 11 | 118278998 | G | T | 0.629  | 0.5295 | +?- | 0      | 0.698 | 1 | 0.4036  |
| rs11235711  | 11 | 72992343  | C | G | -0.626 | 0.5312 | --+ | -7.5   | 3.722 | 2 | 0.1555  |
| rs371862    | 11 | 72288843  | T | C | 0.626  | 0.5313 | -?+ | 0      | 0.718 | 1 | 0.3968  |
| rs625513    | 11 | 118555719 | C | A | 0.625  | 0.5318 | ++- | -65.5  | 2.418 | 2 | 0.2986  |

|             |    |           |   |   |        |        |      |        |       |   |        |
|-------------|----|-----------|---|---|--------|--------|------|--------|-------|---|--------|
| rs113566564 | 11 | 118335147 | A | G | 0.625  | 0.5321 | +?+  | 0      | 0.343 | 1 | 0.5582 |
| rs45457998  | 11 | 118492713 | G | A | -0.624 | 0.5325 | +?-  | 0      | 0.395 | 1 | 0.5298 |
| rs754042    | 11 | 72326275  | T | C | 0.624  | 0.5327 | ---+ | 0      | 1.951 | 2 | 0.377  |
| rs146525935 | 11 | 118180887 | C | T | -0.622 | 0.5342 | -?+  | 0      | 0.449 | 1 | 0.503  |
| rs61010648  | 11 | 118206890 | G | C | -0.621 | 0.5345 | -?-  | 0      | 0.123 | 1 | 0.7254 |
| rs1715421   | 11 | 118105233 | C | T | 0.621  | 0.5346 | +?-  | -126.4 | 1.325 | 1 | 0.2497 |
| rs525485    | 11 | 118555754 | A | G | 0.621  | 0.5346 | ++-  | -63.6  | 2.445 | 2 | 0.2945 |
| rs76651078  | 11 | 118316006 | A | G | 0.617  | 0.5371 | +?-  | 0      | 0.482 | 1 | 0.4876 |
| rs1793159   | 11 | 118104569 | A | C | 0.617  | 0.5373 | +?-  | -124.1 | 1.339 | 1 | 0.2472 |
| rs1715422   | 11 | 118104577 | C | T | 0.617  | 0.5375 | +?-  | -123.9 | 1.34  | 1 | 0.2471 |
| rs4432047   | 11 | 72989489  | G | A | -0.617 | 0.5375 | ---+ | -3.3   | 3.871 | 2 | 0.1443 |
| rs1715420   | 11 | 118105599 | A | T | 0.616  | 0.5376 | +?-  | -124.6 | 1.335 | 1 | 0.2478 |
| rs1626649   | 11 | 118071097 | T | C | 0.616  | 0.5382 | +?-  | 0      | 0.521 | 1 | 0.4705 |
| rs111792147 | 11 | 118259162 | A | G | 0.615  | 0.5386 | +?-  | 0      | 0.931 | 1 | 0.3347 |
| rs35409990  | 11 | 118109196 | A | G | 0.614  | 0.5389 | +?-  | -96.2  | 1.529 | 1 | 0.2163 |
| rs12798453  | 11 | 118561410 | G | T | 0.614  | 0.5394 | ++-  | -59.6  | 2.506 | 2 | 0.2856 |
| rs111430146 | 11 | 118248374 | A | C | 0.614  | 0.5395 | +?-  | 0      | 0.933 | 1 | 0.334  |
| rs555356    | 11 | 118558078 | T | G | 0.614  | 0.5395 | ++-  | -61.4  | 2.478 | 2 | 0.2897 |
| rs607527    | 11 | 118538187 | T | G | 0.613  | 0.5396 | ++-  | -66    | 2.409 | 2 | 0.2998 |
| rs112900272 | 11 | 118326445 | T | C | 0.612  | 0.5405 | +?-  | 0      | 0.454 | 1 | 0.5004 |
| rs638301    | 11 | 118559003 | G | A | 0.612  | 0.5407 | ++-  | -56.7  | 2.552 | 2 | 0.2791 |
| rs45443099  | 11 | 118254710 | G | A | 0.611  | 0.5411 | +?-  | 0      | 0.906 | 1 | 0.3412 |
| rs3765638   | 11 | 72537072  | A | G | 0.61   | 0.5418 | ---+ | -24.1  | 3.223 | 2 | 0.1996 |
| rs112646740 | 11 | 118247805 | A | T | 0.61   | 0.542  | +?-  | 0      | 0.941 | 1 | 0.3321 |
| rs2017122   | 11 | 118314849 | T | C | 0.609  | 0.5423 | +?-  | 0      | 0.437 | 1 | 0.5083 |
| rs73011440  | 11 | 118809619 | A | G | 0.609  | 0.5425 | +?+  | 0      | 0.205 | 1 | 0.6504 |
| rs11216839  | 11 | 118129583 | T | A | 0.609  | 0.5427 | +?-  | -142.6 | 1.237 | 1 | 0.2661 |
| rs11216821  | 11 | 118088362 | C | T | 0.608  | 0.5434 | +?-  | -189.2 | 1.037 | 1 | 0.3085 |
| rs11216859  | 11 | 118238119 | C | T | 0.608  | 0.5435 | +++  | 0      | 0.044 | 2 | 0.9782 |
| rs6589674   | 11 | 118566039 | G | A | 0.608  | 0.5435 | ++-  | -67.3  | 2.391 | 2 | 0.3026 |
| rs1783935   | 11 | 118539566 | T | A | 0.607  | 0.5439 | ++-  | -74.5  | 2.293 | 2 | 0.3178 |
| rs561845    | 11 | 118558827 | G | A | 0.607  | 0.544  | ++-  | -50.5  | 2.658 | 2 | 0.2648 |
| rs533144    | 11 | 118559247 | A | C | 0.603  | 0.5463 | ++-  | -53.8  | 2.601 | 2 | 0.2724 |
| rs486462    | 11 | 118559178 | C | T | 0.603  | 0.5464 | ++-  | -55.1  | 2.579 | 2 | 0.2755 |
| rs7130076   | 11 | 118566090 | C | T | 0.603  | 0.5465 | ++-  | -57.1  | 2.546 | 2 | 0.28   |
| rs876479    | 11 | 118028094 | T | C | -0.603 | 0.5465 | -?-  | 0      | 0.035 | 1 | 0.8511 |
| rs508579    | 11 | 118559084 | C | G | 0.602  | 0.5471 | ++-  | -58.2  | 2.529 | 2 | 0.2824 |
| rs546890    | 11 | 118557198 | C | T | 0.6    | 0.5486 | ++-  | -57.5  | 2.539 | 2 | 0.281  |
| rs11216814  | 11 | 118071857 | G | A | 0.599  | 0.5492 | +?-  | 0      | 0.83  | 1 | 0.3622 |
| rs12794726  | 11 | 118566313 | T | C | 0.599  | 0.5492 | ++-  | -56    | 2.564 | 2 | 0.2774 |
| rs478371    | 11 | 118565336 | A | G | 0.599  | 0.5492 | ++-  | -55.5  | 2.572 | 2 | 0.2764 |
| rs644498    | 11 | 118567486 | C | T | 0.599  | 0.5493 | ++-  | -41.8  | 2.822 | 2 | 0.2439 |
| rs585039    | 11 | 118563381 | A | C | 0.598  | 0.5496 | ++-  | -55.4  | 2.575 | 2 | 0.276  |
| rs9332801   | 11 | 118355642 | C | A | 0.598  | 0.55   | +?+  | 0      | 0.351 | 1 | 0.5537 |
| rs693306    | 11 | 118558333 | G | A | 0.597  | 0.5502 | ++-  | -56.9  | 2.55  | 2 | 0.2795 |
| rs625918    | 11 | 118559542 | T | C | 0.597  | 0.5507 | ++-  | -54.9  | 2.582 | 2 | 0.275  |
| rs582630    | 11 | 118562799 | A | C | 0.596  | 0.5509 | ++-  | -54.8  | 2.583 | 2 | 0.2748 |
| rs558593    | 11 | 118562520 | T | C | 0.596  | 0.5511 | ++-  | -55.8  | 2.568 | 2 | 0.277  |
| rs11216812  | 11 | 118071762 | A | G | 0.596  | 0.5515 | +?-  | 0      | 0.836 | 1 | 0.3604 |
| rs1793137   | 11 | 118016068 | C | T | -0.595 | 0.5518 | ---  | 0      | 0.238 | 2 | 0.888  |
| rs493834    | 11 | 118567444 | G | A | 0.594  | 0.5522 | ++-  | -49.4  | 2.678 | 2 | 0.2622 |
| rs11235710  | 11 | 72992156  | G | C | -0.594 | 0.5523 | ---+ | -6.2   | 3.768 | 2 | 0.152  |
| rs471227    | 11 | 118564601 | C | T | 0.593  | 0.5532 | ++-  | -53.9  | 2.599 | 2 | 0.2727 |
| rs7926970   | 11 | 118559881 | G | T | 0.593  | 0.5534 | ++-  | -55.6  | 2.57  | 2 | 0.2766 |

|             |    |           |   |   |        |        |     |        |       |   |        |
|-------------|----|-----------|---|---|--------|--------|-----|--------|-------|---|--------|
| rs518028    | 11 | 118564982 | C | T | 0.592  | 0.5535 | ++- | -53.8  | 2.601 | 2 | 0.2723 |
| rs1793169   | 11 | 118070264 | G | A | 0.592  | 0.5539 | +?- | 0      | 0.547 | 1 | 0.4597 |
| rs508640    | 11 | 118564413 | G | A | 0.592  | 0.5539 | ++- | -53.6  | 2.604 | 2 | 0.272  |
| rs111587825 | 11 | 118274602 | G | T | 0.592  | 0.554  | +?- | 0      | 0.653 | 1 | 0.4189 |
| rs2071381   | 11 | 118214267 | A | G | 0.592  | 0.554  | +++ | 0      | 0.047 | 2 | 0.9768 |
| rs516153    | 11 | 118564762 | A | C | 0.592  | 0.5541 | ++- | -53.5  | 2.605 | 2 | 0.2718 |
| rs4938529   | 11 | 118560569 | T | C | 0.59   | 0.5552 | ++- | -53.1  | 2.613 | 2 | 0.2708 |
| rs558907    | 11 | 118558455 | G | A | 0.589  | 0.5561 | ++- | -53.8  | 2.601 | 2 | 0.2724 |
| rs502601    | 11 | 118565679 | A | G | 0.588  | 0.5564 | ++- | -54.1  | 2.596 | 2 | 0.2731 |
| rs644867    | 11 | 118567545 | G | A | 0.587  | 0.557  | ++- | -38.2  | 2.895 | 2 | 0.2352 |
| rs571751    | 11 | 118556797 | C | A | 0.587  | 0.5572 | ++- | -54.1  | 2.596 | 2 | 0.273  |
| rs7114458   | 11 | 118566175 | A | G | 0.586  | 0.5576 | ++- | -52.6  | 2.621 | 2 | 0.2697 |
| rs35963948  | 11 | 72991186  | G | A | -0.586 | 0.5578 | --+ | -13.3  | 3.529 | 2 | 0.1713 |
| rs12801003  | 11 | 118072716 | T | C | 0.586  | 0.5581 | +?- | 0      | 0.802 | 1 | 0.3706 |
| rs610664    | 11 | 118556691 | G | A | 0.584  | 0.5589 | ++- | -53.4  | 2.608 | 2 | 0.2715 |
| rs642662    | 11 | 118567020 | G | A | 0.584  | 0.559  | ++- | -57.1  | 2.546 | 2 | 0.28   |
| rs519982    | 11 | 118565231 | T | C | 0.584  | 0.5591 | ++- | -51.6  | 2.639 | 2 | 0.2673 |
| rs140633990 | 11 | 118365883 | A | T | -0.583 | 0.5601 | --- | 0      | 0.136 | 2 | 0.9342 |
| rs7926959   | 11 | 118559866 | C | T | 0.583  | 0.5601 | ++- | -57.9  | 2.533 | 2 | 0.2819 |
| rs11216815  | 11 | 118072232 | A | G | 0.582  | 0.5603 | +?- | 0      | 0.819 | 1 | 0.3654 |
| rs533646    | 11 | 118566746 | G | C | 0.578  | 0.5631 | ++- | -53.2  | 2.611 | 2 | 0.2711 |
| rs11216807  | 11 | 118063030 | C | T | 0.578  | 0.5632 | +++ | 0      | 0.071 | 2 | 0.9651 |
| rs7117266   | 11 | 118838020 | A | G | 0.578  | 0.5634 | -?+ | -91.2  | 1.569 | 1 | 0.2104 |
| rs12275955  | 11 | 118094756 | C | T | 0.578  | 0.5635 | +?- | -78.1  | 1.684 | 1 | 0.1944 |
| rs112243842 | 11 | 118246021 | G | T | 0.577  | 0.5642 | +?- | -198.2 | 1.006 | 1 | 0.3158 |
| rs11235713  | 11 | 72997496  | G | A | -0.576 | 0.5644 | --+ | -20.5  | 3.318 | 2 | 0.1903 |
| rs112468256 | 11 | 118278479 | C | T | 0.576  | 0.5645 | +?- | 0      | 0.619 | 1 | 0.4315 |
| rs7114216   | 11 | 118566234 | G | A | 0.576  | 0.5649 | ++- | -49.8  | 2.67  | 2 | 0.2631 |
| rs111707199 | 11 | 118276810 | G | A | 0.573  | 0.5665 | +?- | 0      | 0.624 | 1 | 0.4297 |
| rs542613    | 11 | 118567084 | A | G | 0.573  | 0.5665 | ++- | -56    | 2.565 | 2 | 0.2774 |
| rs45555733  | 11 | 118237566 | G | C | 0.573  | 0.5667 | +?- | 0      | 0.98  | 1 | 0.3222 |
| rs74398561  | 11 | 118233634 | G | A | 0.573  | 0.5667 | +?- | 0      | 0.98  | 1 | 0.3222 |
| rs45448191  | 11 | 118267737 | A | T | 0.573  | 0.5669 | +?- | 0      | 0.619 | 1 | 0.4316 |
| rs12808111  | 11 | 72992714  | G | A | -0.572 | 0.567  | --+ | 1.7    | 4.071 | 2 | 0.1306 |
| rs693037    | 11 | 118553326 | T | C | 0.571  | 0.568  | ++- | -55.4  | 2.573 | 2 | 0.2762 |
| rs12804550  | 11 | 118011860 | A | G | -0.57  | 0.5689 | -?- | 0      | 0.141 | 1 | 0.7076 |
| rs73555296  | 11 | 118445559 | T | G | 0.57   | 0.569  | +?+ | 0      | 0.055 | 1 | 0.8139 |
| rs112152942 | 11 | 118240840 | G | C | 0.569  | 0.5694 | +?- | 0      | 0.988 | 1 | 0.3203 |
| rs1877652   | 11 | 72307742  | A | G | 0.569  | 0.5695 | -?+ | 0      | 0.61  | 1 | 0.4347 |
| rs67389832  | 11 | 118839032 | A | C | 0.567  | 0.5704 | -?+ | -94.4  | 1.543 | 1 | 0.2142 |
| rs2276417   | 11 | 118230223 | G | T | 0.566  | 0.5716 | +++ | 0      | 0.056 | 2 | 0.9722 |
| rs11235708  | 11 | 72985098  | A | G | -0.565 | 0.5718 | --+ | -8     | 3.705 | 2 | 0.1569 |
| rs7939548   | 11 | 118212979 | A | G | 0.564  | 0.5727 | +?- | -183   | 1.06  | 1 | 0.3032 |
| rs45468196  | 11 | 118242889 | A | G | 0.564  | 0.5729 | +?- | 0      | 0.998 | 1 | 0.3177 |
| rs11216856  | 11 | 118227838 | T | C | 0.562  | 0.5742 | +++ | 0      | 0.059 | 2 | 0.9709 |
| rs12363628  | 11 | 72987038  | C | T | -0.559 | 0.5759 | --+ | -6.8   | 3.744 | 2 | 0.1538 |
| rs12808517  | 11 | 72601276  | T | C | -0.558 | 0.5767 | ++- | 0      | 1.575 | 2 | 0.455  |
| rs12286604  | 11 | 118084728 | A | G | 0.558  | 0.577  | +?- | -162.8 | 1.141 | 1 | 0.2854 |
| rs613377    | 11 | 118556084 | T | C | 0.557  | 0.5773 | ++- | -53.2  | 2.61  | 2 | 0.2711 |
| rs7129048   | 11 | 118211797 | C | T | 0.556  | 0.5779 | +?- | -134.7 | 1.278 | 1 | 0.2582 |
| rs113839182 | 11 | 118273602 | T | C | 0.554  | 0.5796 | +?- | 0      | 0.654 | 1 | 0.4186 |
| rs12808254  | 11 | 118066912 | T | C | -0.554 | 0.5796 | +?- | 0      | 0.645 | 1 | 0.422  |
| rs2282550   | 11 | 118220035 | C | T | 0.554  | 0.5798 | +++ | 0      | 0.089 | 2 | 0.9564 |
| rs11216828  | 11 | 118111676 | A | T | 0.553  | 0.5802 | +?- | -94.6  | 1.542 | 1 | 0.2143 |

|             |    |           |   |   |        |        |     |        |       |   |         |
|-------------|----|-----------|---|---|--------|--------|-----|--------|-------|---|---------|
| rs7939622   | 11 | 118087841 | A | G | 0.553  | 0.5802 | +?- | -160.5 | 1.151 | 1 | 0.2832  |
| rs1980091   | 11 | 72288599  | A | G | 0.551  | 0.5816 | -?+ | 0      | 0.56  | 1 | 0.4542  |
| rs11217078  | 11 | 118750321 | C | T | -0.55  | 0.5826 | -?+ | 0      | 0.311 | 1 | 0.5768  |
| rs4442562   | 11 | 118845813 | A | G | 0.549  | 0.5833 | -?+ | -71.3  | 1.752 | 1 | 0.1857  |
| rs61751532  | 11 | 118769604 | T | C | 0.548  | 0.584  | -?+ | -149.5 | 1.202 | 1 | 0.2728  |
| rs112970787 | 11 | 118212235 | C | G | 0.547  | 0.5843 | +?- | -175.5 | 1.089 | 1 | 0.2967  |
| rs4306318   | 11 | 118080520 | T | C | 0.546  | 0.5852 | +?- | 0      | 0.776 | 1 | 0.3783  |
| rs11216947  | 11 | 118567218 | A | G | 0.545  | 0.5855 | ++  | -45.8  | 2.744 | 2 | 0.2536  |
| rs9651667   | 11 | 118108679 | G | C | 0.545  | 0.5857 | +?- | -109.9 | 1.429 | 1 | 0.2319  |
| rs3181258   | 11 | 118218478 | A | T | 0.544  | 0.5863 | +?- | -189.1 | 1.038 | 1 | 0.3084  |
| rs7126172   | 11 | 118567257 | G | A | 0.544  | 0.5865 | ++  | -49.6  | 2.673 | 2 | 0.2627  |
| rs478296    | 11 | 118567375 | C | T | 0.543  | 0.5874 | ++  | -43    | 2.797 | 2 | 0.247   |
| rs9651688   | 11 | 118107495 | T | C | 0.541  | 0.5883 | +?- | -108.6 | 1.438 | 1 | 0.2304  |
| rs10793055  | 11 | 72710761  | C | T | 0.54   | 0.5889 | --- | 49.9   | 7.99  | 2 | 0.01841 |
| rs692750    | 11 | 118538308 | T | G | 0.54   | 0.5891 | ++  | -55.5  | 2.573 | 2 | 0.2763  |
| rs11216818  | 11 | 118080268 | T | C | 0.54   | 0.5892 | +?- | 0      | 0.786 | 1 | 0.3752  |
| rs526597    | 11 | 118546602 | G | A | 0.536  | 0.5919 | ++  | -83.6  | 2.178 | 2 | 0.3365  |
| rs4457789   | 11 | 118539170 | T | G | 0.532  | 0.5949 | ++  | -96.2  | 2.039 | 2 | 0.3608  |
| rs4589335   | 11 | 118539140 | T | C | 0.528  | 0.5976 | ++  | -52.4  | 2.625 | 2 | 0.2692  |
| rs12286303  | 11 | 118114473 | T | C | 0.527  | 0.5984 | +?- | -73.8  | 1.726 | 1 | 0.1889  |
| rs10502228  | 11 | 118113583 | T | C | 0.526  | 0.5987 | +?- | -76.9  | 1.696 | 1 | 0.1928  |
| rs11216829  | 11 | 118112911 | A | G | 0.523  | 0.6012 | +?- | -76.3  | 1.701 | 1 | 0.1921  |
| rs1547885   | 11 | 118105222 | T | C | 0.521  | 0.6025 | +?- | -97.8  | 1.517 | 1 | 0.2181  |
| rs12286021  | 11 | 118080685 | C | T | 0.519  | 0.6035 | +?- | 0      | 0.868 | 1 | 0.3514  |
| rs60969913  | 11 | 118798154 | C | G | -0.519 | 0.6036 | ++  | 0      | 0.853 | 2 | 0.6529  |
| rs7925466   | 11 | 72778113  | C | A | 0.519  | 0.6039 | --- | 50     | 8.003 | 2 | 0.01828 |
| rs11605435  | 11 | 118116496 | C | T | 0.519  | 0.604  | +?- | -74.8  | 1.716 | 1 | 0.1902  |
| rs11216830  | 11 | 118115147 | A | G | 0.517  | 0.6049 | +?- | -74.5  | 1.72  | 1 | 0.1898  |
| rs7112584   | 11 | 118069240 | A | G | 0.517  | 0.605  | +?- | 0      | 0.73  | 1 | 0.393   |
| rs7101652   | 11 | 118078718 | A | G | 0.517  | 0.6051 | +?- | 0      | 0.789 | 1 | 0.3743  |
| rs3802866   | 11 | 118095803 | T | C | 0.517  | 0.6055 | +?- | -99.9  | 1.501 | 1 | 0.2205  |
| rs12286567  | 11 | 118114788 | T | G | 0.516  | 0.6056 | +?- | -74.2  | 1.722 | 1 | 0.1894  |
| rs7117544   | 11 | 118117938 | C | A | 0.515  | 0.6065 | +?- | -73.9  | 1.726 | 1 | 0.189   |
| rs7943511   | 11 | 118096165 | T | C | 0.515  | 0.6067 | +?- | -99.3  | 1.506 | 1 | 0.2198  |
| rs12295438  | 11 | 118094921 | T | C | 0.515  | 0.6068 | +?- | -99.2  | 1.506 | 1 | 0.2198  |
| rs426907    | 11 | 72294440  | A | G | 0.514  | 0.6072 | -?+ | 0      | 0.561 | 1 | 0.454   |
| rs1561966   | 11 | 118221474 | A | G | 0.513  | 0.6078 | +++ | 0      | 0.08  | 2 | 0.9607  |
| rs34385073  | 11 | 72987413  | C | A | -0.512 | 0.609  | --- | -1.8   | 3.93  | 2 | 0.1402  |
| rs111390501 | 11 | 118797420 | G | A | -0.511 | 0.6091 | ++  | 0      | 0.85  | 2 | 0.6538  |
| rs10790246  | 11 | 118103542 | T | A | 0.51   | 0.6103 | +?- | -98    | 1.515 | 1 | 0.2183  |
| rs595964    | 11 | 118026788 | A | G | -0.508 | 0.6114 | -+- | 0      | 0.517 | 2 | 0.7724  |
| rs73575428  | 11 | 118797003 | G | C | -0.506 | 0.6125 | ++  | 0      | 0.857 | 2 | 0.6516  |
| rs7116594   | 11 | 72984870  | A | G | -0.506 | 0.613  | --- | -4.7   | 3.822 | 2 | 0.1479  |
| rs12280557  | 11 | 118117118 | T | C | 0.504  | 0.6143 | +?- | -71    | 1.755 | 1 | 0.1853  |
| rs3212263   | 11 | 118216423 | G | A | 0.502  | 0.6155 | +++ | 0      | 0.087 | 2 | 0.9576  |
| rs7925928   | 11 | 72748384  | G | A | 0.502  | 0.6157 | --- | 47.3   | 7.592 | 2 | 0.02246 |
| rs7943272   | 11 | 118096028 | C | A | 0.502  | 0.6159 | +?- | -95.1  | 1.538 | 1 | 0.215   |
| rs56032119  | 11 | 118797544 | G | A | -0.501 | 0.6162 | ++  | 0      | 0.847 | 2 | 0.6547  |
| rs45558732  | 11 | 118402962 | T | G | 0.501  | 0.6166 | +?- | 0      | 0.426 | 1 | 0.5142  |
| rs73575429  | 11 | 118797392 | C | T | -0.5   | 0.6172 | ++  | 0      | 0.847 | 2 | 0.6548  |
| rs74584888  | 11 | 118797278 | A | G | -0.499 | 0.6179 | ++  | 0      | 0.847 | 2 | 0.6549  |
| rs76448372  | 11 | 118045846 | A | G | -0.498 | 0.6186 | -?+ | 0      | 0.881 | 1 | 0.3478  |
| rs520543    | 11 | 118538157 | A | G | 0.496  | 0.6202 | ++  | -71.3  | 2.336 | 2 | 0.311   |
| rs11216834  | 11 | 118122077 | C | T | 0.494  | 0.6213 | +?- | -68.4  | 1.781 | 1 | 0.182   |

|             |    |           |   |   |        |        |      |        |       |   |         |
|-------------|----|-----------|---|---|--------|--------|------|--------|-------|---|---------|
| rs7951159   | 11 | 118780950 | T | C | -0.494 | 0.6213 | -?+  | 0      | 0.788 | 1 | 0.3748  |
| rs11216861  | 11 | 118241516 | A | G | 0.493  | 0.6218 | +++  | 0      | 0.022 | 2 | 0.9891  |
| rs59049611  | 11 | 118139403 | C | T | -0.492 | 0.6226 | -?+  | -59.1  | 1.885 | 1 | 0.1697  |
| rs10892230  | 11 | 118126682 | A | C | 0.49   | 0.6243 | +?-  | -67.4  | 1.792 | 1 | 0.1806  |
| rs9332793   | 11 | 118354458 | A | G | 0.488  | 0.6252 | +?-  | 0      | 0.309 | 1 | 0.5784  |
| rs2365774   | 11 | 72308203  | G | A | 0.486  | 0.6269 | -?+  | 0      | 0.526 | 1 | 0.4681  |
| rs45480805  | 11 | 118267903 | A | G | 0.481  | 0.6303 | +?-  | 0      | 0.637 | 1 | 0.4248  |
| rs12362596  | 11 | 118105473 | C | G | -0.48  | 0.631  | -?+  | 0      | 0.35  | 1 | 0.5543  |
| rs9332794   | 11 | 118354505 | T | G | 0.479  | 0.6319 | +?-  | 0      | 0.319 | 1 | 0.572   |
| rs6589675   | 11 | 118569414 | C | G | 0.477  | 0.6333 | +?-  | -100.4 | 1.497 | 1 | 0.2212  |
| rs10790241  | 11 | 118013034 | A | G | -0.472 | 0.6367 | -?-  | 0      | 0.081 | 1 | 0.7756  |
| rs11604683  | 11 | 72538546  | C | T | -0.472 | 0.6369 | ++-  | 0      | 1.722 | 2 | 0.4227  |
| rs79157249  | 11 | 118785982 | T | A | -0.472 | 0.6371 | ++-  | 0      | 1.032 | 2 | 0.5969  |
| rs1783937   | 11 | 118609736 | A | G | 0.47   | 0.6386 | +?-  | -24.4  | 2.412 | 1 | 0.1204  |
| rs11217081  | 11 | 118769032 | G | A | -0.469 | 0.6394 | ---+ | 0      | 0.333 | 2 | 0.8465  |
| rs77487830  | 11 | 118311869 | G | A | 0.467  | 0.6407 | ++-  | 0      | 0.773 | 2 | 0.6794  |
| rs7116375   | 11 | 118069979 | A | C | 0.459  | 0.6462 | +?-  | 0      | 0.807 | 1 | 0.3689  |
| rs581063    | 11 | 118767077 | C | T | -0.457 | 0.6475 | ---+ | 0      | 0.268 | 2 | 0.8744  |
| rs644287    | 11 | 118011805 | T | C | 0.457  | 0.6478 | ++-  | 0      | 1.158 | 2 | 0.5604  |
| rs77535829  | 11 | 118311677 | T | C | 0.456  | 0.6483 | ++-  | 0      | 0.782 | 2 | 0.6764  |
| rs57495164  | 11 | 118095148 | C | T | -0.456 | 0.6484 | -?+  | 0      | 0.488 | 1 | 0.485   |
| rs489126    | 11 | 118572747 | A | G | 0.452  | 0.6512 | ++-  | -82.2  | 2.195 | 2 | 0.3337  |
| rs869638    | 11 | 118100411 | C | G | -0.451 | 0.6522 | -?+  | 0      | 0.5   | 1 | 0.4794  |
| rs7941321   | 11 | 118702910 | A | G | 0.449  | 0.6533 | ++-  | 0      | 0.391 | 2 | 0.8224  |
| rs11216827  | 11 | 118110202 | T | A | -0.447 | 0.6548 | -?+  | 0      | 0.417 | 1 | 0.5182  |
| rs1573559   | 11 | 118104627 | A | G | -0.445 | 0.6566 | -?+  | 0      | 0.379 | 1 | 0.5381  |
| rs11217083  | 11 | 118770321 | G | A | -0.443 | 0.6577 | ---+ | 0      | 0.239 | 2 | 0.8876  |
| rs11600134  | 11 | 118070788 | A | G | 0.443  | 0.6577 | +?-  | 0      | 0.836 | 1 | 0.3605  |
| rs2508991   | 11 | 118539522 | A | G | 0.442  | 0.6588 | ++-  | -65.4  | 2.418 | 2 | 0.2984  |
| rs2368238   | 11 | 118091761 | G | T | -0.441 | 0.6589 | -?+  | 0      | 0.411 | 1 | 0.5215  |
| rs534114    | 11 | 118702002 | A | G | 0.441  | 0.6593 | ++-  | 0      | 0.447 | 2 | 0.7997  |
| rs7941696   | 11 | 118702936 | G | A | 0.441  | 0.6595 | ++-  | 0      | 0.703 | 2 | 0.7036  |
| rs11216826  | 11 | 118099713 | T | A | -0.44  | 0.6596 | -?+  | 0      | 0.472 | 1 | 0.4921  |
| rs7928228   | 11 | 118703001 | T | C | 0.44   | 0.6603 | ++-  | 0      | 0.436 | 2 | 0.8043  |
| rs11216825  | 11 | 118099617 | A | G | -0.439 | 0.6607 | -?+  | 0      | 0.474 | 1 | 0.4911  |
| rs12294669  | 11 | 118041972 | G | A | -0.438 | 0.6612 | +?-  | -130.3 | 1.303 | 1 | 0.2537  |
| rs10892226  | 11 | 118096618 | A | G | -0.436 | 0.663  | -?+  | 0      | 0.424 | 1 | 0.515   |
| rs113521822 | 11 | 118063349 | G | A | 0.435  | 0.6638 | +?-  | 0      | 0.343 | 1 | 0.5582  |
| rs1170396   | 11 | 118703817 | T | A | 0.434  | 0.6643 | ++-  | 0      | 0.445 | 2 | 0.8004  |
| rs2051480   | 11 | 118094513 | G | A | -0.433 | 0.6649 | -?+  | 0      | 0.437 | 1 | 0.5086  |
| rs2508921   | 11 | 118703484 | T | C | 0.429  | 0.668  | ++-  | 0      | 0.454 | 2 | 0.7968  |
| rs9332781   | 11 | 118346599 | G | A | 0.426  | 0.6704 | +?-  | 0      | 0.343 | 1 | 0.558   |
| rs7936751   | 11 | 72720199  | G | T | 0.423  | 0.6722 | ---+ | 46.1   | 7.415 | 2 | 0.02453 |
| rs75709684  | 11 | 118050958 | A | G | -0.42  | 0.6746 | +?-  | 0      | 0.566 | 1 | 0.4519  |
| rs7948661   | 11 | 118341649 | C | T | 0.419  | 0.6749 | +?-  | 0      | 0.415 | 1 | 0.5194  |
| rs112965917 | 11 | 118725189 | A | T | 0.419  | 0.6753 | +?-  | 0      | 0.708 | 1 | 0.4001  |
| rs622690    | 11 | 118704265 | T | C | 0.416  | 0.6771 | ++-  | 0      | 0.456 | 2 | 0.796   |
| rs77806521  | 11 | 118232026 | T | C | 0.416  | 0.6777 | +?+  | 0      | 0.031 | 1 | 0.8612  |
| rs1791049   | 11 | 72890304  | T | C | 0.415  | 0.6784 | ++-  | -47.4  | 2.713 | 2 | 0.2575  |
| rs17122021  | 11 | 118145686 | T | C | -0.414 | 0.679  | -?+  | -68.7  | 1.779 | 1 | 0.1823  |
| rs544096    | 11 | 118594326 | G | A | 0.412  | 0.6803 | ++-  | -53.5  | 2.605 | 2 | 0.2718  |
| rs74422681  | 11 | 118312870 | G | A | 0.411  | 0.6808 | ++-  | 0      | 1.263 | 2 | 0.5317  |
| rs480791    | 11 | 118704255 | G | A | 0.411  | 0.6813 | ++-  | 0      | 0.466 | 2 | 0.792   |
| rs4938493   | 11 | 118144804 | G | T | -0.411 | 0.6813 | -?+  | -61.2  | 1.861 | 1 | 0.1725  |

|             |    |           |   |   |        |        |      |        |       |   |         |
|-------------|----|-----------|---|---|--------|--------|------|--------|-------|---|---------|
| rs7127013   | 11 | 72999221  | A | G | -0.41  | 0.6818 | --+  | 2.3    | 4.094 | 2 | 0.1291  |
| rs4245180   | 11 | 118144512 | A | G | -0.409 | 0.6823 | -?+  | -67.6  | 1.79  | 1 | 0.1809  |
| rs7926717   | 11 | 118121399 | T | G | 0.409  | 0.6823 | +?-  | -140.5 | 1.248 | 1 | 0.264   |
| rs10892222  | 11 | 118041102 | A | G | -0.408 | 0.6832 | +?-  | -117.3 | 1.38  | 1 | 0.2401  |
| rs73615909  | 11 | 118322488 | T | C | 0.407  | 0.6839 | +?-  | 0      | 0.491 | 1 | 0.4834  |
| rs11235547  | 11 | 72318831  | A | G | 0.407  | 0.6841 | -?+  | 0      | 0.798 | 1 | 0.3718  |
| rs341047    | 11 | 72301503  | A | G | 0.406  | 0.6848 | +?-  | 0      | 0.459 | 1 | 0.4981  |
| rs4486664   | 11 | 118569067 | C | A | 0.405  | 0.6851 | ++-  | -97.1  | 2.03  | 2 | 0.3624  |
| rs2027764   | 11 | 72998247  | G | A | -0.404 | 0.6864 | ---+ | 3.9    | 4.164 | 2 | 0.1247  |
| rs4938549   | 11 | 118701597 | T | C | 0.403  | 0.687  | ++-  | 0      | 0.484 | 2 | 0.7852  |
| rs6589649   | 11 | 118048836 | C | T | -0.403 | 0.6871 | +?-  | 0      | 0.315 | 1 | 0.5747  |
| rs530646    | 11 | 118701668 | A | G | 0.401  | 0.6882 | ++-  | 0      | 0.487 | 2 | 0.7841  |
| rs7940554   | 11 | 118142930 | T | C | -0.401 | 0.6883 | -?+  | -65.5  | 1.813 | 1 | 0.1782  |
| rs638893    | 11 | 118698537 | G | A | 0.4    | 0.6888 | ++-  | 0      | 0.55  | 2 | 0.7597  |
| rs4393358   | 11 | 118569097 | T | C | 0.395  | 0.6929 | ++-  | -78.3  | 2.243 | 2 | 0.3257  |
| rs1540191   | 11 | 118090432 | A | G | -0.394 | 0.6938 | -?+  | 0      | 0.492 | 1 | 0.4829  |
| rs639885    | 11 | 118698294 | A | G | 0.394  | 0.6938 | ++-  | 0      | 0.563 | 2 | 0.7546  |
| rs640373    | 11 | 118698160 | G | A | 0.393  | 0.6946 | ++-  | 0      | 0.565 | 2 | 0.7538  |
| rs1783583   | 11 | 72889432  | C | G | 0.392  | 0.695  | ++-  | -46.6  | 2.728 | 2 | 0.2557  |
| rs7941217   | 11 | 118349247 | T | C | 0.392  | 0.695  | +?-  | 0      | 0.42  | 1 | 0.5169  |
| rs341088    | 11 | 72313975  | T | C | -0.392 | 0.6954 | ---+ | 0      | 1.523 | 2 | 0.467   |
| rs76248354  | 11 | 118042606 | A | G | -0.391 | 0.696  | -?+  | 0      | 0.719 | 1 | 0.3966  |
| rs11235712  | 11 | 72994199  | C | T | -0.39  | 0.6965 | ---+ | 22.3   | 5.148 | 2 | 0.07622 |
| rs526850    | 11 | 118605127 | G | T | 0.389  | 0.6969 | +?-  | -29.7  | 2.312 | 1 | 0.1283  |
| rs57533048  | 11 | 118050014 | G | A | -0.39  | 0.6969 | +?-  | 0      | 0.397 | 1 | 0.5287  |
| rs7127705   | 11 | 72999064  | T | C | -0.389 | 0.6972 | ---+ | 0      | 4.001 | 2 | 0.1353  |
| rs2368242   | 11 | 118115526 | C | T | -0.389 | 0.6974 | -?+  | 0      | 0.573 | 1 | 0.4489  |
| rs57506367  | 11 | 118141993 | C | T | -0.387 | 0.6988 | -?+  | -62.1  | 1.851 | 1 | 0.1737  |
| rs4245179   | 11 | 118144445 | G | A | -0.387 | 0.699  | -?+  | -62    | 1.852 | 1 | 0.1736  |
| rs882904    | 11 | 72997910  | G | A | -0.386 | 0.6994 | ---+ | 1.8    | 4.074 | 2 | 0.1304  |
| rs639915    | 11 | 118698274 | A | G | 0.385  | 0.6999 | ++-  | 0      | 0.58  | 2 | 0.7484  |
| rs11607355  | 11 | 118093547 | T | C | -0.385 | 0.7001 | -?+  | 0      | 0.436 | 1 | 0.5092  |
| rs564892    | 11 | 118602392 | A | T | 0.384  | 0.7013 | ++-  | -41.3  | 2.831 | 2 | 0.2429  |
| rs7123811   | 11 | 118569469 | G | T | 0.383  | 0.7014 | ++-  | -89    | 2.116 | 2 | 0.3471  |
| rs112590920 | 11 | 118143586 | A | G | -0.382 | 0.7022 | -?+  | -69    | 1.775 | 1 | 0.1828  |
| rs67262752  | 11 | 118047776 | C | T | -0.382 | 0.7025 | +?-  | 0      | 0.402 | 1 | 0.5259  |
| rs7342287   | 11 | 118050404 | A | G | -0.381 | 0.703  | +?-  | 0      | 0.291 | 1 | 0.5895  |
| rs7940047   | 11 | 118142619 | T | C | -0.381 | 0.7032 | -?+  | -67.6  | 1.79  | 1 | 0.181   |
| rs12577061  | 11 | 118121553 | C | G | -0.38  | 0.7043 | -?+  | 0      | 0.547 | 1 | 0.4596  |
| rs56356019  | 11 | 118114893 | G | A | -0.379 | 0.7046 | -?+  | 0      | 0.499 | 1 | 0.4799  |
| rs521910    | 11 | 118610629 | A | G | 0.377  | 0.706  | +?-  | -11.6  | 2.689 | 1 | 0.1011  |
| rs497916    | 11 | 118758089 | T | C | 0.376  | 0.7072 | +++  | 0      | 0.1   | 2 | 0.9513  |
| rs517445    | 11 | 118573535 | G | A | 0.375  | 0.708  | ++-  | -87.9  | 2.129 | 2 | 0.345   |
| rs57461652  | 11 | 118146197 | A | C | -0.374 | 0.7081 | -?+  | -49.5  | 2.007 | 1 | 0.1565  |
| rs11235620  | 11 | 72680931  | T | A | 0.374  | 0.7086 | ++-  | 0      | 1.974 | 2 | 0.3727  |
| rs516332    | 11 | 118698777 | G | A | 0.373  | 0.7089 | ++-  | 0      | 0.62  | 2 | 0.7333  |
| rs2510901   | 11 | 118699863 | A | G | 0.371  | 0.7106 | ++-  | 0      | 0.609 | 2 | 0.7373  |
| rs656445    | 11 | 118012164 | A | G | 0.371  | 0.7109 | ++-  | 0      | 1.073 | 2 | 0.5849  |
| rs7479114   | 11 | 118568813 | T | C | 0.37   | 0.7111 | ++-  | -86    | 2.151 | 2 | 0.3412  |
| rs79699220  | 11 | 118550841 | C | G | -0.368 | 0.7125 | +?-  | 0      | 0.396 | 1 | 0.5291  |
| rs12364013  | 11 | 118119575 | T | C | -0.368 | 0.7126 | -?+  | 0      | 0.563 | 1 | 0.4529  |
| rs7123533   | 11 | 118049257 | G | C | -0.367 | 0.7138 | +?-  | 0      | 0.369 | 1 | 0.5437  |
| rs58162302  | 11 | 118146199 | T | A | -0.366 | 0.7141 | -?+  | -50.5  | 1.994 | 1 | 0.158   |
| rs557990    | 11 | 118601363 | T | C | 0.366  | 0.7147 | ++-  | -37.6  | 2.908 | 2 | 0.2337  |

|             |    |           |   |   |        |        |      |       |       |   |         |
|-------------|----|-----------|---|---|--------|--------|------|-------|-------|---|---------|
| rs611733    | 11 | 118572760 | T | C | 0.365  | 0.7153 | ++-  | -89.2 | 2.114 | 2 | 0.3475  |
| rs73024604  | 11 | 118120351 | T | C | -0.364 | 0.7162 | -?+  | 0     | 0.571 | 1 | 0.45    |
| rs583213    | 11 | 118669178 | G | T | 0.363  | 0.7164 | +?-  | -99.3 | 1.505 | 1 | 0.2198  |
| rs570371    | 11 | 118568472 | G | A | 0.363  | 0.7169 | ++-  | -76.6 | 2.265 | 2 | 0.3222  |
| rs2508564   | 11 | 118699744 | C | T | 0.361  | 0.7178 | ++-  | 0     | 0.63  | 2 | 0.7299  |
| rs56315433  | 11 | 118114576 | A | C | -0.361 | 0.718  | -?+  | 0     | 0.488 | 1 | 0.485   |
| rs611217    | 11 | 118572611 | T | C | 0.361  | 0.718  | ++-  | -77.9 | 2.248 | 2 | 0.325   |
| rs657539    | 11 | 118572021 | T | C | 0.361  | 0.7184 | ++-  | -91.3 | 2.091 | 2 | 0.3515  |
| rs67163042  | 11 | 118050779 | G | A | -0.361 | 0.7185 | +?-  | 0     | 0.269 | 1 | 0.6039  |
| rs73024606  | 11 | 118120366 | C | G | -0.36  | 0.7187 | -?+  | 0     | 0.576 | 1 | 0.448   |
| rs61900655  | 11 | 118120802 | C | G | -0.359 | 0.7194 | -?+  | 0     | 0.577 | 1 | 0.4474  |
| rs17092740  | 11 | 118117614 | A | G | -0.359 | 0.7195 | -?+  | 0     | 0.488 | 1 | 0.4849  |
| rs59018400  | 11 | 118049811 | T | C | -0.358 | 0.7201 | +?-  | 0     | 0.359 | 1 | 0.5493  |
| rs11216813  | 11 | 118071836 | A | G | 0.358  | 0.7204 | +?-  | 0     | 0.737 | 1 | 0.3907  |
| rs10898872  | 11 | 72497425  | C | T | 0.357  | 0.7208 | ---+ | 38.8  | 6.54  | 2 | 0.038   |
| rs604096    | 11 | 118475098 | G | A | 0.355  | 0.7224 | ---+ | -13.4 | 3.528 | 2 | 0.1713  |
| rs673547    | 11 | 118573339 | A | G | 0.355  | 0.7229 | ++-  | -85.7 | 2.154 | 2 | 0.3406  |
| rs481903    | 11 | 118567733 | C | T | 0.354  | 0.7232 | ++-  | -82.7 | 2.189 | 2 | 0.3346  |
| rs12577053  | 11 | 118121421 | A | G | -0.353 | 0.724  | -?+  | 0     | 0.587 | 1 | 0.4438  |
| rs11216800  | 11 | 118048885 | G | A | -0.352 | 0.7248 | +?-  | 0     | 0.558 | 1 | 0.455   |
| rs552079    | 11 | 118573022 | C | T | 0.352  | 0.7249 | ++-  | -84.7 | 2.165 | 2 | 0.3387  |
| rs649338    | 11 | 118705654 | A | G | 0.352  | 0.7249 | ++-  | 0     | 0.48  | 2 | 0.7867  |
| rs10898915  | 11 | 72998687  | A | G | -0.351 | 0.7257 | ---+ | 7.2   | 4.312 | 2 | 0.1158  |
| rs498912    | 11 | 118576997 | C | T | 0.351  | 0.7258 | +?-  | -55.5 | 1.93  | 1 | 0.1648  |
| rs651825    | 11 | 118042713 | G | T | 0.35   | 0.7264 | +?+  | 0     | 0.025 | 1 | 0.8744  |
| rs56301948  | 11 | 118049880 | G | A | -0.35  | 0.7267 | +?-  | 0     | 0.348 | 1 | 0.5552  |
| rs7342223   | 11 | 118050348 | G | T | -0.349 | 0.7274 | +?-  | 0     | 0.347 | 1 | 0.5558  |
| rs17310235  | 11 | 72607076  | G | A | 0.348  | 0.7275 | ++-  | 0     | 1.311 | 2 | 0.5192  |
| rs7119702   | 11 | 118607694 | G | A | 0.348  | 0.7281 | +?-  | -33.2 | 2.252 | 1 | 0.1334  |
| rs657769    | 11 | 118571316 | T | C | 0.348  | 0.7282 | ++-  | -76.9 | 2.261 | 2 | 0.3229  |
| rs636736    | 11 | 118705145 | G | A | 0.346  | 0.7295 | ++-  | 0     | 0.669 | 2 | 0.7156  |
| rs544452    | 11 | 118571357 | T | G | 0.346  | 0.7296 | ++-  | -76.3 | 2.269 | 2 | 0.3216  |
| rs7108144   | 11 | 118569694 | A | G | 0.345  | 0.7297 | ++-  | -76.2 | 2.27  | 2 | 0.3215  |
| rs523793    | 11 | 118570697 | T | C | 0.343  | 0.7313 | ++-  | -75.6 | 2.278 | 2 | 0.3201  |
| rs554456    | 11 | 118570062 | C | T | 0.343  | 0.7314 | ++-  | -75.5 | 2.279 | 2 | 0.32    |
| rs482889    | 11 | 118570098 | T | G | 0.342  | 0.7322 | ++-  | -75.2 | 2.283 | 2 | 0.3193  |
| rs12793594  | 11 | 118569900 | C | T | 0.342  | 0.7323 | ++-  | -75.1 | 2.284 | 2 | 0.3192  |
| rs488141    | 11 | 118571168 | G | A | 0.342  | 0.7323 | ++-  | -75.1 | 2.284 | 2 | 0.3192  |
| rs658676    | 11 | 118571123 | T | C | 0.342  | 0.7323 | ++-  | -75.1 | 2.284 | 2 | 0.3192  |
| rs541631    | 11 | 118571023 | G | A | 0.342  | 0.7324 | ++-  | -75.1 | 2.284 | 2 | 0.3191  |
| rs659564    | 11 | 118570914 | A | C | 0.342  | 0.7324 | ++-  | -75.1 | 2.284 | 2 | 0.3191  |
| rs642224    | 11 | 118570919 | A | G | 0.34   | 0.734  | ++-  | -75.3 | 2.282 | 2 | 0.3195  |
| rs11235595  | 11 | 72512708  | C | G | 0.34   | 0.7342 | ---+ | 35.5  | 6.202 | 2 | 0.04501 |
| rs628299    | 11 | 118018022 | G | A | 0.34   | 0.7342 | ---+ | -89.3 | 2.113 | 2 | 0.3477  |
| rs655499    | 11 | 118063479 | G | A | 0.339  | 0.7343 | ++-  | 0     | 0.192 | 2 | 0.9086  |
| rs493720    | 11 | 118604678 | T | C | 0.339  | 0.7346 | +?-  | -25.3 | 2.393 | 1 | 0.1218  |
| rs656287    | 11 | 118571790 | G | A | 0.339  | 0.7348 | ++-  | -88.5 | 2.122 | 2 | 0.346   |
| rs511451    | 11 | 118568639 | T | C | 0.336  | 0.7366 | ++-  | -93.9 | 2.063 | 2 | 0.3565  |
| rs11216824  | 11 | 118096818 | A | G | 0.335  | 0.7376 | +?-  | -105  | 1.463 | 1 | 0.2264  |
| rs113784020 | 11 | 118559731 | T | C | -0.334 | 0.7381 | +?-  | 0     | 0.727 | 1 | 0.3939  |
| rs341089    | 11 | 72313462  | A | G | 0.334  | 0.7382 | +?-  | 0     | 0.177 | 1 | 0.674   |
| rs7121712   | 11 | 72993695  | A | T | -0.333 | 0.739  | ---+ | 13.9  | 4.645 | 2 | 0.09805 |
| rs570949    | 11 | 118571911 | T | G | 0.331  | 0.7409 | ++-  | -78.1 | 2.247 | 2 | 0.3252  |
| rs58508419  | 11 | 118762102 | A | G | 0.328  | 0.7427 | +?-  | 0     | 0.695 | 1 | 0.4043  |

|             |    |           |   |   |        |        |     |        |       |   |         |
|-------------|----|-----------|---|---|--------|--------|-----|--------|-------|---|---------|
| rs574383    | 11 | 118573668 | C | T | 0.327  | 0.7437 | ++- | -86.1  | 2.15  | 2 | 0.3413  |
| rs111313044 | 11 | 118803596 | A | G | -0.327 | 0.7439 | +-  | -58    | 2.531 | 2 | 0.2821  |
| rs10892221  | 11 | 118040642 | A | G | -0.326 | 0.7442 | +?- | -91.3  | 1.568 | 1 | 0.2104  |
| rs1715456   | 11 | 118123517 | G | A | -0.326 | 0.7443 | -?+ | 0      | 0.762 | 1 | 0.3829  |
| rs73575440  | 11 | 118803160 | A | G | -0.325 | 0.7453 | +-  | -63.8  | 2.442 | 2 | 0.2949  |
| rs4943939   | 11 | 72309540  | T | C | -0.323 | 0.7464 | --- | 0      | 1.629 | 2 | 0.4429  |
| rs371412    | 11 | 72303491  | A | G | 0.323  | 0.747  | +?- | 0      | 0.384 | 1 | 0.5356  |
| rs12577841  | 11 | 118194599 | T | C | -0.322 | 0.7473 | -+- | 0      | 0.399 | 2 | 0.8191  |
| rs75459003  | 11 | 118053859 | C | A | -0.322 | 0.7476 | +?- | 0      | 0.514 | 1 | 0.4735  |
| rs59069289  | 11 | 118802128 | T | G | -0.321 | 0.7483 | +-  | -64.2  | 2.436 | 2 | 0.2958  |
| rs59480472  | 11 | 118802386 | C | T | -0.321 | 0.7485 | +-  | -64.2  | 2.435 | 2 | 0.2959  |
| rs642765    | 11 | 118030310 | C | G | -0.32  | 0.7487 | -?- | 0      | 0.002 | 1 | 0.9614  |
| rs11216816  | 11 | 118075152 | A | C | 0.32   | 0.7489 | +?- | 0      | 0.678 | 1 | 0.4102  |
| rs10793048  | 11 | 72580398  | T | C | 0.32   | 0.7491 | ++  | 0      | 1.454 | 2 | 0.4834  |
| rs61900882  | 11 | 118130199 | C | T | -0.317 | 0.7513 | -?+ | 0      | 0.679 | 1 | 0.41    |
| rs519294    | 11 | 118573743 | A | C | 0.315  | 0.7526 | ++  | -82.8  | 2.188 | 2 | 0.3348  |
| rs10793054  | 11 | 72662812  | A | C | 0.315  | 0.7529 | --- | 55.7   | 9.019 | 2 | 0.011   |
| rs4488208   | 11 | 118877621 | C | G | 0.315  | 0.7529 | -?+ | 28.6   | 4.2   | 1 | 0.04042 |
| rs12295676  | 11 | 118054345 | A | G | -0.312 | 0.7548 | +?- | 0      | 0.5   | 1 | 0.4794  |
| rs78755429  | 11 | 118777978 | A | C | 0.311  | 0.7556 | +?- | -95.4  | 1.535 | 1 | 0.2153  |
| rs11216817  | 11 | 118075474 | T | C | 0.31   | 0.7568 | +?- | 0      | 0.695 | 1 | 0.4043  |
| rs74395230  | 11 | 118052662 | T | C | -0.309 | 0.7571 | +?- | 0      | 0.496 | 1 | 0.4812  |
| rs12271064  | 11 | 118119211 | G | A | 0.307  | 0.7586 | +?- | -70.1  | 1.763 | 1 | 0.1842  |
| rs500254    | 11 | 118678780 | G | A | 0.307  | 0.7589 | +?- | -101.5 | 1.489 | 1 | 0.2224  |
| rs17121997  | 11 | 118131049 | C | T | -0.305 | 0.7601 | -?+ | 0      | 0.691 | 1 | 0.406   |
| rs594171    | 11 | 118032974 | A | T | -0.303 | 0.7616 | -?- | 0      | 0.003 | 1 | 0.9531  |
| rs3018386   | 11 | 118016622 | G | C | 0.303  | 0.7619 | +-  | 0      | 1.809 | 2 | 0.4048  |
| rs1126205   | 11 | 72523794  | T | G | 0.303  | 0.762  | ++  | 37.8   | 6.433 | 2 | 0.0401  |
| rs116848264 | 11 | 118049817 | A | T | -0.302 | 0.7629 | -?+ | 0      | 0.339 | 1 | 0.5602  |
| rs75460330  | 11 | 118809767 | A | G | -0.299 | 0.7652 | +-  | -84.8  | 2.164 | 2 | 0.3389  |
| rs79820203  | 11 | 118051010 | C | T | -0.297 | 0.7662 | +?- | 0      | 0.479 | 1 | 0.4887  |
| rs7927676   | 11 | 118051323 | G | C | -0.297 | 0.7663 | +?- | 0      | 0.479 | 1 | 0.4888  |
| rs12798851  | 11 | 118135973 | G | T | 0.297  | 0.7664 | +?- | 0      | 0.798 | 1 | 0.3718  |
| rs2186781   | 11 | 118605447 | T | C | 0.296  | 0.7669 | +?- | -24.2  | 2.416 | 1 | 0.1201  |
| rs10790248  | 11 | 118125672 | A | G | -0.296 | 0.7674 | -?+ | 0      | 0.607 | 1 | 0.4359  |
| rs11235546  | 11 | 72312118  | T | G | -0.296 | 0.7674 | --- | 0      | 1.741 | 2 | 0.4187  |
| rs687664    | 11 | 118574185 | A | C | 0.293  | 0.7692 | ++  | 0      | 1.992 | 2 | 0.3694  |
| rs523715    | 11 | 118574188 | A | G | 0.293  | 0.7695 | ++  | 0      | 1.993 | 2 | 0.3692  |
| rs73575441  | 11 | 118804919 | C | T | -0.29  | 0.7717 | +-  | -59.1  | 2.514 | 2 | 0.2845  |
| rs76050019  | 11 | 118051857 | C | T | -0.289 | 0.7729 | +?- | 0      | 0.467 | 1 | 0.4942  |
| rs56933877  | 11 | 118804643 | A | G | -0.288 | 0.7737 | +-  | -59.4  | 2.51  | 2 | 0.2851  |
| rs73557344  | 11 | 118810054 | C | G | -0.287 | 0.7744 | +-  | -86.1  | 2.149 | 2 | 0.3415  |
| rs11216949  | 11 | 118568668 | T | C | 0.286  | 0.7751 | ++  | -85.9  | 2.152 | 2 | 0.341   |
| rs4936425   | 11 | 118126904 | T | C | -0.285 | 0.7754 | -?+ | 0      | 0.675 | 1 | 0.4114  |
| rs73575454  | 11 | 118807639 | A | G | -0.285 | 0.7758 | +-  | -83.7  | 2.178 | 2 | 0.3365  |
| rs12291619  | 11 | 118062552 | A | G | -0.283 | 0.7773 | +?- | 0      | 0.528 | 1 | 0.4675  |
| rs658040    | 11 | 118572171 | G | A | 0.278  | 0.7812 | ++  | -62    | 2.469 | 2 | 0.2909  |
| rs7934292   | 11 | 118059914 | C | T | -0.277 | 0.7821 | +?- | 0      | 0.517 | 1 | 0.4721  |
| rs7933859   | 11 | 118662045 | T | C | 0.276  | 0.7828 | +?- | -124   | 1.34  | 1 | 0.2471  |
| rs4938492   | 11 | 118126675 | C | T | -0.275 | 0.7836 | -?+ | 0      | 0.644 | 1 | 0.4221  |
| rs1790192   | 11 | 118757191 | G | A | 0.274  | 0.7837 | --- | -89.2  | 2.114 | 2 | 0.3476  |
| rs112045567 | 11 | 118804989 | G | A | -0.273 | 0.7847 | +-  | -52.2  | 2.628 | 2 | 0.2688  |
| rs553188    | 11 | 118576762 | T | C | 0.273  | 0.7847 | +?- | -32.2  | 2.269 | 1 | 0.132   |
| rs12284089  | 11 | 118058542 | T | C | -0.273 | 0.7848 | +?- | 0      | 0.512 | 1 | 0.4741  |

|             |    |           |   |   |        |        |     |        |       |   |         |
|-------------|----|-----------|---|---|--------|--------|-----|--------|-------|---|---------|
| rs76831657  | 11 | 118051082 | G | A | -0.272 | 0.7855 | +?- | 0      | 0.544 | 1 | 0.4608  |
| rs11608072  | 11 | 118030086 | C | G | -0.271 | 0.7865 | +?- | 0      | 0.081 | 1 | 0.7754  |
| rs637737    | 11 | 118051646 | G | A | -0.271 | 0.7867 | +?- | 0      | 0.21  | 1 | 0.6465  |
| rs1104542   | 11 | 118129340 | T | C | -0.269 | 0.788  | -?+ | 0      | 0.659 | 1 | 0.4168  |
| rs4938544   | 11 | 118665009 | A | G | 0.268  | 0.7883 | +?- | -132   | 1.293 | 1 | 0.2555  |
| rs4508234   | 11 | 118662203 | G | C | 0.267  | 0.7891 | +?- | -129.5 | 1.307 | 1 | 0.2529  |
| rs656308    | 11 | 118031206 | T | G | -0.265 | 0.7909 | -?- | 0      | 0.002 | 1 | 0.9665  |
| rs10898885  | 11 | 72571275  | T | C | 0.264  | 0.7917 | ++- | 0      | 1.901 | 2 | 0.3866  |
| rs11216860  | 11 | 118240332 | C | T | 0.263  | 0.7923 | +++ | 0      | 0.118 | 2 | 0.9425  |
| rs7935492   | 11 | 118056823 | T | C | -0.261 | 0.7938 | +?- | 0      | 0.496 | 1 | 0.4814  |
| rs11216791  | 11 | 118044360 | G | A | -0.261 | 0.7945 | +?- | 0      | 0.759 | 1 | 0.3836  |
| rs640323    | 11 | 118010890 | C | G | 0.259  | 0.7955 | +-  | 0      | 1.305 | 2 | 0.5207  |
| rs12282334  | 11 | 118057783 | G | C | -0.257 | 0.7974 | +?- | 0      | 0.489 | 1 | 0.4843  |
| rs341049    | 11 | 72298208  | T | C | -0.256 | 0.7978 | --+ | 0      | 1.893 | 2 | 0.388   |
| rs11217068  | 11 | 118729283 | T | C | -0.252 | 0.8007 | -?+ | 35.7   | 4.663 | 1 | 0.03081 |
| rs71482132  | 11 | 118031211 | A | G | -0.252 | 0.8013 | -?- | 0      | 0.003 | 1 | 0.9556  |
| rs7105658   | 11 | 118712270 | T | C | 0.249  | 0.8033 | +++ | 26.1   | 5.413 | 2 | 0.06677 |
| rs645451    | 11 | 118025969 | T | C | 0.239  | 0.8113 | -?+ | 0      | 0.134 | 1 | 0.7145  |
| rs117745694 | 11 | 118218491 | A | G | -0.238 | 0.8122 | +?- | 0      | 0.259 | 1 | 0.6108  |
| rs341086    | 11 | 72317803  | T | C | -0.236 | 0.8135 | --+ | 0      | 1.749 | 2 | 0.4171  |
| rs582200    | 11 | 118668908 | G | A | 0.233  | 0.8157 | +?- | -132.1 | 1.292 | 1 | 0.2556  |
| rs2853009   | 11 | 118148146 | G | A | -0.233 | 0.8158 | +?- | -74    | 1.724 | 1 | 0.1892  |
| rs642936    | 11 | 118019906 | C | T | 0.233  | 0.8158 | +-  | 0      | 1.647 | 2 | 0.439   |
| rs675003    | 11 | 118677083 | T | C | 0.232  | 0.8164 | +?- | -120.2 | 1.362 | 1 | 0.2431  |
| rs11235597  | 11 | 72516773  | A | G | 0.231  | 0.817  | +++ | 33     | 5.969 | 2 | 0.05055 |
| rs9735317   | 11 | 118725383 | T | C | -0.231 | 0.8173 | -?+ | 36.4   | 4.718 | 1 | 0.02985 |
| rs35381826  | 11 | 118032438 | T | G | -0.23  | 0.8182 | -?- | 0      | 0.005 | 1 | 0.9429  |
| rs73575424  | 11 | 118788517 | A | C | -0.226 | 0.8213 | ++  | 0      | 0.92  | 2 | 0.6313  |
| rs7129921   | 11 | 72676874  | G | T | 0.224  | 0.8229 | --+ | 55.3   | 8.939 | 2 | 0.01145 |
| rs61900957  | 11 | 118501723 | T | C | -0.22  | 0.8256 | +?- | 19.3   | 3.718 | 1 | 0.05383 |
| rs11600901  | 11 | 118031986 | A | G | -0.214 | 0.8308 | -?- | 0      | 0.004 | 1 | 0.9514  |
| rs7102253   | 11 | 72792697  | C | T | -0.213 | 0.8314 | ++- | -55.8  | 2.568 | 2 | 0.277   |
| rs2276064   | 11 | 118529703 | A | G | -0.211 | 0.8328 | +-  | -53.8  | 2.601 | 2 | 0.2724  |
| rs75403174  | 11 | 118043904 | A | C | -0.211 | 0.833  | +?- | 0      | 0.92  | 1 | 0.3374  |
| rs384892    | 11 | 72309889  | A | G | 0.21   | 0.8339 | +?- | 0      | 0.297 | 1 | 0.5856  |
| rs7117594   | 11 | 118714492 | T | C | 0.206  | 0.8369 | +++ | 29.8   | 5.7   | 2 | 0.05786 |
| rs5006102   | 11 | 118662340 | A | T | 0.204  | 0.8381 | +?- | -106.1 | 1.455 | 1 | 0.2277  |
| rs11216792  | 11 | 118044450 | T | G | -0.204 | 0.8384 | +?- | 0      | 0.907 | 1 | 0.3408  |
| rs3862796   | 11 | 72705522  | T | C | -0.203 | 0.839  | -+- | -57    | 2.548 | 2 | 0.2797  |
| rs11216790  | 11 | 118044144 | T | G | -0.201 | 0.8407 | +?- | 0      | 0.912 | 1 | 0.3396  |
| rs61901410  | 11 | 118661197 | G | C | -0.2   | 0.8416 | +?- | -7.1   | 2.802 | 1 | 0.09416 |
| rs116979688 | 11 | 118032223 | T | C | 0.199  | 0.8419 | +?+ | 0      | 0.001 | 1 | 0.9778  |
| rs7924647   | 11 | 118728479 | G | A | -0.195 | 0.8453 | -?+ | 35.5   | 4.654 | 1 | 0.03098 |
| rs3759001   | 11 | 118135745 | T | C | -0.192 | 0.8475 | +?- | 0      | 0.052 | 1 | 0.819   |
| rs1790063   | 11 | 72995912  | A | G | -0.19  | 0.849  | -?- | 0      | 0.01  | 1 | 0.9199  |
| rs12289120  | 11 | 118066609 | T | C | 0.19   | 0.8494 | +?- | 0      | 0.359 | 1 | 0.5488  |
| rs10736495  | 11 | 118607090 | C | G | 0.189  | 0.8499 | +?- | -49.2  | 2.011 | 1 | 0.1562  |
| rs1629083   | 11 | 118126576 | T | C | -0.188 | 0.8512 | -?+ | 0      | 0.55  | 1 | 0.4584  |
| rs678262    | 11 | 118021740 | G | C | 0.178  | 0.8589 | +-  | -8.6   | 3.682 | 2 | 0.1587  |
| rs145762171 | 11 | 118748789 | A | G | -0.177 | 0.8598 | +?- | -76.7  | 1.697 | 1 | 0.1926  |
| rs1786183   | 11 | 118017445 | A | G | 0.172  | 0.8635 | -?+ | -119.8 | 1.365 | 1 | 0.2427  |
| rs72969876  | 11 | 72589778  | C | G | -0.166 | 0.8682 | +-  | 0      | 1.319 | 2 | 0.5171  |
| rs2187490   | 11 | 118713180 | G | T | -0.166 | 0.8684 | +?- | 0      | 0.233 | 1 | 0.6296  |
| rs12420093  | 11 | 118272963 | G | A | -0.164 | 0.8696 | --+ | 1.9    | 4.078 | 2 | 0.1302  |

|             |    |           |   |   |        |        |     |        |       |   |         |
|-------------|----|-----------|---|---|--------|--------|-----|--------|-------|---|---------|
| rs45555132  | 11 | 118064030 | T | G | -0.163 | 0.8704 | -?+ | 0      | 0.23  | 1 | 0.6314  |
| rs61901411  | 11 | 118665324 | T | C | 0.163  | 0.8709 | +?- | -96.7  | 1.526 | 1 | 0.2168  |
| rs61894194  | 11 | 72513028  | T | C | 0.161  | 0.8722 | ++  | 33.5   | 6.014 | 2 | 0.04944 |
| rs72979412  | 11 | 72639396  | C | T | 0.16   | 0.8726 | +?- | -157.5 | 1.165 | 1 | 0.2804  |
| rs4938550   | 11 | 118707171 | G | A | -0.158 | 0.8741 | +?- | 0      | 0.081 | 1 | 0.7754  |
| rs1628409   | 11 | 72885257  | T | C | -0.157 | 0.8749 | ++  | 0      | 1.492 | 2 | 0.4743  |
| rs12276533  | 11 | 118724116 | A | G | -0.156 | 0.8757 | -?+ | 34.9   | 4.611 | 1 | 0.03176 |
| rs658624    | 11 | 118018767 | G | A | 0.156  | 0.8759 | -?+ | -84.2  | 1.628 | 1 | 0.2019  |
| rs73005500  | 11 | 118697375 | C | T | -0.154 | 0.8778 | +?- | 0      | 0.356 | 1 | 0.5509  |
| rs1613495   | 11 | 118017645 | T | C | 0.153  | 0.8786 | -?+ | 0      | 0.779 | 1 | 0.3775  |
| rs11235617  | 11 | 72644631  | C | T | 0.151  | 0.8799 | +?- | -153.2 | 1.185 | 1 | 0.2763  |
| rs611979    | 11 | 118034223 | A | G | -0.149 | 0.8812 | -?- | 0      | 0.014 | 1 | 0.9064  |
| rs647975    | 11 | 118038741 | T | C | 0.148  | 0.882  | +?- | 0      | 0.126 | 1 | 0.7226  |
| rs1793157   | 11 | 118017434 | C | A | 0.148  | 0.8824 | ++  | 0      | 1.699 | 2 | 0.4277  |
| rs602594    | 11 | 118040610 | T | C | 0.144  | 0.8858 | +?- | 0      | 0.058 | 1 | 0.8092  |
| rs614825    | 11 | 118018725 | G | A | 0.143  | 0.886  | -?+ | -81.3  | 1.654 | 1 | 0.1984  |
| rs12272981  | 11 | 118709600 | G | A | -0.142 | 0.8873 | -?+ | 37.5   | 4.797 | 1 | 0.02851 |
| rs58507982  | 11 | 118146510 | T | C | -0.138 | 0.8904 | -?+ | -137.5 | 1.263 | 1 | 0.261   |
| rs572608    | 11 | 118801640 | A | T | 0.138  | 0.8906 | +-  | 0      | 1.256 | 2 | 0.5337  |
| rs679327    | 11 | 118042974 | G | A | 0.137  | 0.8912 | +?+ | 0      | 0.018 | 1 | 0.8939  |
| rs45508093  | 11 | 118224059 | G | A | 0.132  | 0.8947 | -?+ | 0      | 0.308 | 1 | 0.5791  |
| rs7119568   | 11 | 118723753 | A | T | -0.132 | 0.8947 | -?+ | 34.1   | 4.555 | 1 | 0.03282 |
| rs1793149   | 11 | 118127347 | A | G | 0.131  | 0.8958 | +?- | 0      | 0.513 | 1 | 0.4738  |
| rs880895    | 11 | 72884382  | A | G | -0.131 | 0.8958 | ++  | 0      | 1.561 | 2 | 0.4581  |
| rs4944014   | 11 | 72527180  | T | C | 0.13   | 0.8962 | ++  | -81.5  | 2.204 | 2 | 0.3321  |
| rs11217096  | 11 | 118796570 | T | C | -0.129 | 0.8972 | +-  | 0      | 1.591 | 2 | 0.4514  |
| rs611960    | 11 | 118034228 | G | T | -0.129 | 0.8977 | -?- | 0      | 0.008 | 1 | 0.927   |
| rs10892281  | 11 | 118614397 | T | C | 0.123  | 0.9025 | +?- | -67.8  | 1.788 | 1 | 0.1812  |
| rs7107376   | 11 | 72640991  | G | T | 0.122  | 0.9026 | +?- | -152.4 | 1.189 | 1 | 0.2756  |
| rs75488969  | 11 | 118712509 | T | C | 0.122  | 0.9027 | +?- | 0      | 0.761 | 1 | 0.3831  |
| rs11603160  | 11 | 72894273  | T | C | -0.122 | 0.9029 | -?+ | -173.5 | 1.097 | 1 | 0.2949  |
| rs1715443   | 11 | 118017365 | G | T | 0.121  | 0.9041 | -?+ | -70.6  | 1.758 | 1 | 0.1849  |
| rs12805658  | 11 | 72555300  | A | C | -0.12  | 0.9044 | ++  | -55.7  | 2.569 | 2 | 0.2768  |
| rs113641235 | 11 | 118700264 | T | C | -0.12  | 0.9049 | +-  | 0      | 0.36  | 2 | 0.8353  |
| rs583905    | 11 | 118695908 | G | A | 0.119  | 0.9049 | +?- | 0      | 0.479 | 1 | 0.4887  |
| rs3018387   | 11 | 118016981 | T | A | 0.117  | 0.9069 | -?+ | -75.5  | 1.71  | 1 | 0.191   |
| rs598746    | 11 | 118020057 | A | G | -0.112 | 0.9112 | -?+ | 0      | 0.291 | 1 | 0.5894  |
| rs6589687   | 11 | 118615660 | T | A | 0.111  | 0.912  | +?- | -64.8  | 1.82  | 1 | 0.1773  |
| rs7108905   | 11 | 118712427 | G | C | -0.11  | 0.9123 | -?+ | 37.8   | 4.821 | 1 | 0.02812 |
| rs583490    | 11 | 118022608 | A | G | 0.108  | 0.9139 | +-  | -31.6  | 3.041 | 2 | 0.2186  |
| rs1793150   | 11 | 118127314 | G | A | 0.107  | 0.9147 | +?- | 0      | 0.548 | 1 | 0.4592  |
| rs7104819   | 11 | 118769442 | G | A | 0.107  | 0.9148 | --- | 0      | 0.556 | 2 | 0.7571  |
| rs515707    | 11 | 118685481 | T | C | 0.105  | 0.9164 | +?- | 0      | 0.429 | 1 | 0.5127  |
| rs3922      | 11 | 118765600 | G | A | 0.103  | 0.9178 | ++  | 0      | 0.416 | 2 | 0.8123  |
| rs1783574   | 11 | 72863527  | A | G | 0.101  | 0.9197 | ++  | 0      | 0.861 | 2 | 0.6503  |
| rs8192614   | 11 | 118037564 | A | G | -0.099 | 0.9208 | -?- | 0      | 0.004 | 1 | 0.9494  |
| rs7122510   | 11 | 118708785 | A | C | -0.099 | 0.9212 | -?+ | 31.1   | 4.355 | 1 | 0.0369  |
| rs1715450   | 11 | 118128445 | C | G | 0.098  | 0.922  | +?- | 0      | 0.561 | 1 | 0.4537  |
| rs6589677   | 11 | 118583971 | A | G | 0.098  | 0.9222 | +?- | -41.2  | 2.124 | 1 | 0.145   |
| rs1715449   | 11 | 118128455 | G | A | 0.097  | 0.923  | +?- | 0      | 0.563 | 1 | 0.4529  |
| rs4944016   | 11 | 72597438  | T | C | -0.097 | 0.9231 | ++  | -60.3  | 2.495 | 2 | 0.2873  |
| rs7122511   | 11 | 118708786 | A | C | -0.096 | 0.9237 | -?+ | 31.3   | 4.368 | 1 | 0.03662 |
| rs1793151   | 11 | 118126920 | C | T | 0.094  | 0.9255 | +?- | 0      | 0.568 | 1 | 0.451   |
| rs12799445  | 11 | 72592506  | G | T | -0.093 | 0.9262 | ++  | -78.2  | 2.245 | 2 | 0.3255  |

|             |    |           |   |   |        |        |     |       |       |   |         |
|-------------|----|-----------|---|---|--------|--------|-----|-------|-------|---|---------|
| rs593753    | 11 | 72691440  | T | C | 0.089  | 0.9287 | ++- | -52.4 | 2.624 | 2 | 0.2693  |
| rs2298831   | 11 | 118068752 | C | T | 0.089  | 0.929  | +?- | 0     | 0.416 | 1 | 0.5189  |
| rs56027064  | 11 | 72563104  | G | T | -0.089 | 0.9293 | +-  | 0     | 1.273 | 2 | 0.5292  |
| rs341048    | 11 | 72298280  | T | C | 0.088  | 0.9295 | +?- | 0     | 0.013 | 1 | 0.9103  |
| rs10898889  | 11 | 72605382  | C | G | 0.088  | 0.9298 | ++- | -64.3 | 2.435 | 2 | 0.2959  |
| rs1056562   | 11 | 118125625 | T | C | 0.086  | 0.9312 | +?- | 0     | 0.579 | 1 | 0.4467  |
| rs577121    | 11 | 118690550 | C | T | 0.084  | 0.9333 | +?- | 0     | 0.514 | 1 | 0.4733  |
| rs180884425 | 11 | 118620195 | C | T | 0.084  | 0.9334 | ++  | 0     | 0.065 | 2 | 0.9682  |
| rs1715453   | 11 | 118125077 | T | C | 0.081  | 0.9358 | +?- | 0     | 0.588 | 1 | 0.4433  |
| rs12286723  | 11 | 118734640 | T | C | -0.079 | 0.9369 | -?+ | 41.9  | 5.168 | 1 | 0.02301 |
| rs678957    | 11 | 118050855 | T | C | 0.078  | 0.9382 | +?+ | 0     | 0.001 | 1 | 0.9691  |
| rs533254    | 11 | 118701898 | A | T | 0.075  | 0.9403 | +?- | 0     | 0.24  | 1 | 0.6245  |
| rs11822039  | 11 | 72638704  | A | C | -0.074 | 0.9411 | ++  | -66   | 2.409 | 2 | 0.2998  |
| rs600325    | 11 | 118041133 | C | T | 0.073  | 0.9419 | +?- | 0     | 0.007 | 1 | 0.9337  |
| rs11608057  | 11 | 118030185 | T | C | -0.072 | 0.9422 | -+- | 0     | 0.103 | 2 | 0.95    |
| rs2946743   | 11 | 118017088 | G | A | 0.067  | 0.9465 | -?+ | -70.6 | 1.759 | 1 | 0.1848  |
| rs586053    | 11 | 118020568 | A | G | -0.067 | 0.9465 | -?+ | 0     | 0.233 | 1 | 0.6296  |
| rs640120    | 11 | 118618837 | A | C | 0.066  | 0.9473 | +?- | -68.5 | 1.781 | 1 | 0.1821  |
| rs4456279   | 11 | 72520003  | A | G | 0.066  | 0.9474 | +++ | 34.3  | 6.089 | 2 | 0.04763 |
| rs535996    | 11 | 118637666 | T | C | 0.065  | 0.9483 | +?- | -51   | 1.987 | 1 | 0.1587  |
| rs584935    | 11 | 118696175 | A | G | 0.065  | 0.9486 | +?- | 0     | 0.398 | 1 | 0.5284  |
| rs529717    | 11 | 118640081 | A | G | 0.063  | 0.9498 | +?- | -53   | 1.96  | 1 | 0.1615  |
| rs1961138   | 11 | 118619423 | C | T | 0.062  | 0.9502 | +?- | -67.5 | 1.791 | 1 | 0.1808  |
| rs485901    | 11 | 118622245 | G | A | 0.06   | 0.9525 | +?- | -66.8 | 1.798 | 1 | 0.1799  |
| rs577217    | 11 | 72489023  | G | A | 0.059  | 0.9527 | +++ | 38    | 6.451 | 2 | 0.03974 |
| rs1783570   | 11 | 72871654  | A | G | 0.059  | 0.9531 | ++  | -13.3 | 3.531 | 2 | 0.1711  |
| rs2508929   | 11 | 118641451 | G | T | 0.056  | 0.9551 | +?- | -51.6 | 1.979 | 1 | 0.1595  |
| rs587816    | 11 | 118689871 | A | C | 0.055  | 0.956  | +?- | 0     | 0.496 | 1 | 0.4812  |
| rs2946742   | 11 | 118017093 | G | A | 0.054  | 0.9568 | -?+ | -74.7 | 1.717 | 1 | 0.1901  |
| rs523148    | 11 | 118682462 | T | C | 0.054  | 0.957  | +?- | 0     | 0.306 | 1 | 0.58    |
| rs6421568   | 11 | 118655704 | C | G | 0.049  | 0.9613 | +?- | -49.9 | 2.001 | 1 | 0.1572  |
| rs7118009   | 11 | 118707559 | T | C | -0.047 | 0.9628 | -?+ | 25.2  | 4.011 | 1 | 0.0452  |
| rs61581699  | 11 | 118045423 | A | G | -0.042 | 0.9664 | +?- | 0     | 0.246 | 1 | 0.6202  |
| rs548167    | 11 | 118648396 | A | G | 0.039  | 0.9691 | +?- | -47.9 | 2.029 | 1 | 0.1544  |
| rs10128600  | 11 | 118700425 | C | T | 0.032  | 0.9747 | +?- | 0     | 0.362 | 1 | 0.5472  |
| rs1784295   | 11 | 118660932 | A | G | 0.032  | 0.9747 | +?- | -35.5 | 2.214 | 1 | 0.1368  |
| rs12277355  | 11 | 118729442 | T | C | -0.031 | 0.975  | +++ | 15.9  | 4.756 | 2 | 0.09275 |
| rs6589690   | 11 | 118632893 | A | G | -0.031 | 0.9755 | +?- | -55.8 | 1.926 | 1 | 0.1652  |
| rs6421569   | 11 | 118655775 | A | C | 0.03   | 0.9757 | +?- | -46.2 | 2.052 | 1 | 0.152   |
| rs2508915   | 11 | 118652781 | C | G | 0.029  | 0.9771 | +?- | -45.8 | 2.057 | 1 | 0.1515  |
| rs7946861   | 11 | 72557986  | G | A | -0.027 | 0.9786 | ++  | -62.1 | 2.468 | 2 | 0.2911  |
| rs3132744   | 11 | 72886304  | G | A | 0.027  | 0.9788 | ++  | -10.6 | 3.615 | 2 | 0.164   |
| rs11216794  | 11 | 118044740 | A | T | -0.019 | 0.9846 | +?- | 0     | 0.301 | 1 | 0.5833  |
| rs113941645 | 11 | 118545589 | G | C | 0.018  | 0.9857 | +?- | 0     | 0.212 | 1 | 0.6448  |
| rs1790188   | 11 | 118661055 | T | C | 0.015  | 0.9877 | +?- | -37   | 2.19  | 1 | 0.139   |
| rs2187494   | 11 | 72805603  | G | A | 0.015  | 0.988  | ++  | 0     | 1.833 | 2 | 0.3999  |
| rs1612659   | 11 | 72835303  | T | C | -0.009 | 0.9931 | ++  | 0     | 1.955 | 2 | 0.3762  |
| rs10892311  | 11 | 118807735 | T | C | -0.006 | 0.9949 | -+- | 0     | 1.439 | 2 | 0.487   |
| rs475946    | 11 | 118629143 | T | C | -0.004 | 0.9967 | +?- | -61.3 | 1.859 | 1 | 0.1727  |
| rs1790187   | 11 | 118644213 | A | G | 0.001  | 0.999  | +?- | -98.8 | 1.509 | 1 | 0.2192  |
| rs74678032  | 11 | 118812559 | C | T | -0.001 | 0.9994 | +?- | -50.2 | 1.997 | 1 | 0.1576  |

**Supplemental Data 3: Meta-analysis of SjD and SLE data in DDX6-CXCR5 locus (Merged Datasets :**

| SNP        | CHR | BP(GRCh37/hg19) | A1 | A2 | Zscore | P.value  | Direction | HetISq | HetChiSq | HetDf | HetPVal |
|------------|-----|-----------------|----|----|--------|----------|-----------|--------|----------|-------|---------|
| rs11217045 | 11  | 118697865       | A  | C  | -8.471 | 2.42E-17 | -----     | 0      | 1.872    | 4     | 0.7592  |
| rs73005502 | 11  | 118697906       | G  | A  | -8.47  | 2.46E-17 | -----     | 0      | 1.879    | 4     | 0.758   |
| rs4938573  | 11  | 118741842       | C  | T  | -8.437 | 3.26E-17 | -----     | 0      | 1.855    | 4     | 0.7623  |
| rs11217046 | 11  | 118698907       | A  | G  | -8.418 | 3.82E-17 | -----     | 0      | 2.15     | 4     | 0.7082  |
| rs10892293 | 11  | 118665575       | T  | A  | -8.418 | 3.83E-17 | -----     | 0      | 2.298    | 4     | 0.6812  |
| rs715412   | 11  | 118684610       | A  | G  | -8.397 | 4.58E-17 | -----     | 0      | 2.503    | 4     | 0.644   |
| rs4936444  | 11  | 118743338       | T  | C  | -8.357 | 6.43E-17 | -----     | 0      | 2.067    | 4     | 0.7235  |
| rs11217032 | 11  | 118669605       | A  | T  | -8.354 | 6.57E-17 | -----     | 0      | 2.365    | 4     | 0.669   |
| rs28409215 | 11  | 118679304       | A  | G  | -8.353 | 6.66E-17 | -----     | 0      | 2.239    | 4     | 0.6919  |
| rs11217038 | 11  | 118677355       | A  | G  | -8.352 | 6.72E-17 | -----     | 0      | 2.294    | 4     | 0.6819  |
| rs11217037 | 11  | 118677086       | A  | G  | -8.349 | 6.89E-17 | -----     | 0      | 2.187    | 4     | 0.7014  |
| rs79504890 | 11  | 118701018       | A  | G  | -8.343 | 7.25E-17 | -----     | 0      | 2.388    | 4     | 0.6648  |
| rs11217033 | 11  | 118673706       | C  | T  | -8.329 | 8.16E-17 | -----     | 0      | 2.281    | 4     | 0.6843  |
| rs11217036 | 11  | 118675772       | T  | C  | -8.327 | 8.30E-17 | -----     | 0      | 2.313    | 4     | 0.6785  |
| rs73005423 | 11  | 118681079       | G  | A  | -8.307 | 9.84E-17 | -----     | 0      | 2.336    | 4     | 0.6742  |
| rs10892294 | 11  | 118667357       | C  | G  | -8.306 | 9.87E-17 | -----     | 0      | 2.255    | 4     | 0.689   |
| rs74541740 | 11  | 118742800       | A  | G  | -8.296 | 1.08E-16 | -----     | 0      | 1.659    | 4     | 0.7981  |
| rs7951740  | 11  | 118740418       | G  | C  | -8.274 | 1.30E-16 | -----     | 0      | 1.727    | 4     | 0.7858  |
| rs7117261  | 11  | 118741157       | T  | C  | -8.258 | 1.48E-16 | -----     | 0      | 1.774    | 4     | 0.7773  |
| rs11217074 | 11  | 118734000       | C  | T  | -8.245 | 1.66E-16 | -----     | 0      | 1.462    | 4     | 0.8334  |
| rs7122669  | 11  | 118739056       | A  | G  | -8.233 | 1.82E-16 | -----     | 0      | 1.59     | 4     | 0.8106  |
| rs7119044  | 11  | 118738298       | G  | C  | -8.229 | 1.89E-16 | -----     | 0      | 1.577    | 4     | 0.8129  |
| rs75249660 | 11  | 118721565       | A  | G  | -8.192 | 2.56E-16 | -----     | 0      | 1.823    | 4     | 0.7683  |
| rs10790268 | 11  | 118729391       | A  | G  | -8.187 | 2.69E-16 | -----     | 0      | 1.987    | 4     | 0.7381  |
| rs11217058 | 11  | 118722149       | A  | G  | -8.175 | 2.96E-16 | -----     | 0      | 2.024    | 4     | 0.7314  |
| rs10790269 | 11  | 118729456       | C  | T  | -8.162 | 3.29E-16 | -----     | 0      | 1.979    | 4     | 0.7397  |
| rs11826521 | 11  | 118610549       | T  | G  | -8.149 | 3.66E-16 | -----     | 0      | 2.522    | 4     | 0.6407  |
| rs2077579  | 11  | 118619047       | G  | T  | -8.145 | 3.79E-16 | -----     | 0      | 2.56     | 4     | 0.6339  |
| rs10892280 | 11  | 118611817       | T  | C  | -8.133 | 4.18E-16 | -----     | 0      | 2.433    | 4     | 0.6566  |
| rs4936441  | 11  | 118725660       | C  | G  | -8.106 | 5.24E-16 | -----     | 0      | 2.114    | 4     | 0.7148  |
| rs6589684  | 11  | 118610957       | A  | G  | -8.096 | 5.66E-16 | -----     | 0      | 1.805    | 4     | 0.7715  |
| rs11217066 | 11  | 118726753       | G  | T  | -8.094 | 5.80E-16 | -----     | 0      | 2.026    | 4     | 0.7311  |
| rs56758835 | 11  | 118615340       | A  | G  | -8.059 | 7.67E-16 | -----     | 0      | 2.244    | 4     | 0.691   |
| rs1048024  | 11  | 118618776       | T  | A  | -8.042 | 8.82E-16 | -----     | 0      | 2.356    | 4     | 0.6707  |
| rs11217009 | 11  | 118615785       | T  | C  | -8.04  | 9.00E-16 | -----     | 0      | 2.181    | 4     | 0.7025  |
| rs7481819  | 11  | 118745278       | C  | T  | -8.035 | 9.37E-16 | -----     | 0      | 2.321    | 4     | 0.677   |
| rs3889239  | 11  | 118619960       | T  | C  | -8.033 | 9.53E-16 | -----     | 0      | 2.261    | 4     | 0.6878  |
| rs2004781  | 11  | 118619253       | T  | C  | -8.029 | 9.79E-16 | -----     | 0      | 2.28     | 4     | 0.6845  |
| rs74676029 | 11  | 118628373       | T  | C  | -7.988 | 1.37E-15 | -----     | 0      | 2.361    | 4     | 0.6696  |
| rs57494551 | 11  | 118661398       | T  | C  | -7.981 | 1.45E-15 | -----     | 0      | 2.682    | 4     | 0.6123  |
| rs7481797  | 11  | 118745243       | A  | G  | -7.981 | 1.45E-15 | -----     | 0      | 2.129    | 4     | 0.7121  |
| rs11217020 | 11  | 118639353       | A  | G  | -7.971 | 1.57E-15 | -----     | 0      | 2.469    | 4     | 0.6502  |
| rs874621   | 11  | 118655645       | A  | G  | -7.951 | 1.85E-15 | -----     | 0      | 2.357    | 4     | 0.6705  |
| rs4936443  | 11  | 118740864       | C  | T  | -7.94  | 2.03E-15 | -----     | 0      | 1.896    | 4     | 0.7549  |
| rs11217019 | 11  | 118636343       | A  | C  | -7.938 | 2.06E-15 | -----     | 0      | 2.527    | 4     | 0.6397  |
| rs10892283 | 11  | 118636980       | G  | A  | -7.936 | 2.08E-15 | -----     | 0      | 2.588    | 4     | 0.6289  |
| rs10892287 | 11  | 118642999       | C  | T  | -7.93  | 2.20E-15 | -----     | 0      | 2.538    | 4     | 0.6378  |
| rs10892288 | 11  | 118644694       | G  | A  | -7.929 | 2.21E-15 | -----     | 0      | 2.479    | 4     | 0.6484  |
| rs10892292 | 11  | 118655340       | C  | G  | -7.919 | 2.40E-15 | -----     | 0      | 2.418    | 4     | 0.6594  |
| rs10892286 | 11  | 118642085       | C  | A  | -7.907 | 2.64E-15 | -----     | 0      | 2.551    | 4     | 0.6356  |
| rs10892290 | 11  | 118653503       | T  | G  | -7.902 | 2.74E-15 | -----     | 0      | 2.463    | 4     | 0.6513  |
| rs10892289 | 11  | 118646003       | T  | C  | -7.902 | 2.75E-15 | -----     | 0      | 2.378    | 4     | 0.6665  |
| rs56043232 | 11  | 118648373       | T  | C  | -7.891 | 3.00E-15 | -----     | 0      | 2.421    | 4     | 0.6589  |
| rs10892291 | 11  | 118653517       | T  | C  | -7.838 | 4.59E-15 | -----     | 0      | 2.537    | 4     | 0.638   |

|             |    |           |   |   |        |          |      |       |       |   |         |
|-------------|----|-----------|---|---|--------|----------|------|-------|-------|---|---------|
| rs10790275  | 11 | 118745884 | G | C | -7.789 | 6.74E-15 | ---- | 0     | 2.25  | 4 | 0.6899  |
| rs4938572   | 11 | 118740931 | C | T | -7.726 | 1.11E-14 | ---- | 0     | 1.472 | 4 | 0.8317  |
| rs11217040  | 11 | 118680648 | A | C | -7.723 | 1.14E-14 | ---- | -31.6 | 4.56  | 4 | 0.3355  |
| rs7117313   | 11 | 118744396 | C | G | -7.713 | 1.23E-14 | ---- | 0     | 2.135 | 4 | 0.711   |
| rs17122453  | 11 | 118683564 | A | G | -7.633 | 2.29E-14 | ---- | -34.8 | 4.45  | 4 | 0.3485  |
| rs77209083  | 11 | 118607569 | G | A | -7.633 | 2.30E-14 | ---- | 0     | 2.149 | 4 | 0.7084  |
| rs11217042  | 11 | 118682528 | A | G | -7.583 | 3.37E-14 | ---- | -37.9 | 4.352 | 4 | 0.3605  |
| rs73005426  | 11 | 118681083 | G | A | -7.581 | 3.44E-14 | ---- | -40.9 | 4.259 | 4 | 0.3721  |
| rs7942535   | 11 | 118681464 | C | T | -7.575 | 3.60E-14 | ---- | -36.9 | 4.383 | 4 | 0.3566  |
| rs11217044  | 11 | 118696022 | C | T | -7.574 | 3.62E-14 | ---- | 0     | 3.6   | 4 | 0.4628  |
| rs11217041  | 11 | 118682350 | G | A | -7.573 | 3.64E-14 | ---- | -36.7 | 4.389 | 4 | 0.3559  |
| rs7119038   | 11 | 118738281 | G | A | -7.565 | 3.88E-14 | ---- | 0     | 2.998 | 4 | 0.5582  |
| rs11217001  | 11 | 118607046 | A | G | -7.546 | 4.47E-14 | ---- | 0     | 2.455 | 4 | 0.6527  |
| rs12365699  | 11 | 118743286 | A | G | -7.528 | 5.17E-14 | ---- | 0     | 2.976 | 4 | 0.5618  |
| rs7123726   | 11 | 118694547 | C | T | -7.524 | 5.31E-14 | ---- | -21.4 | 4.942 | 4 | 0.2933  |
| rs11217006  | 11 | 118609790 | A | G | -7.45  | 9.33E-14 | ---- | 0     | 3.684 | 4 | 0.4505  |
| rs10892279  | 11 | 118611781 | A | G | -7.391 | 1.46E-13 | ---- | 0     | 3.291 | 4 | 0.5103  |
| rs6589685   | 11 | 118612197 | C | T | -7.372 | 1.68E-13 | ---- | 0     | 3.23  | 4 | 0.52    |
| rs2155433   | 11 | 118612921 | A | G | -7.291 | 3.07E-13 | ---- | 0     | 3.283 | 4 | 0.5117  |
| rs7945144   | 11 | 118608716 | G | A | -7.267 | 3.67E-13 | ---- | 0     | 3.204 | 4 | 0.5243  |
| rs12364971  | 11 | 118607794 | G | T | -7.167 | 7.65E-13 | ---- | 0     | 3.073 | 4 | 0.5457  |
| rs73003215  | 11 | 118649512 | A | G | -7.156 | 8.32E-13 | ---- | 0     | 2.985 | 4 | 0.5604  |
| rs76409436  | 11 | 118607871 | A | G | -7.15  | 8.70E-13 | ---- | 0     | 3.162 | 4 | 0.5311  |
| rs6589682   | 11 | 118606722 | T | C | -7.063 | 1.63E-12 | ---- | 0     | 3.268 | 4 | 0.5141  |
| rs11217002  | 11 | 118607150 | T | C | -7.006 | 2.45E-12 | ---- | 0     | 3.129 | 4 | 0.5365  |
| rs56267528  | 11 | 118607311 | A | C | -7.005 | 2.48E-12 | ---- | 0     | 2.872 | 4 | 0.5795  |
| rs55894437  | 11 | 118607417 | T | C | -6.983 | 2.89E-12 | ---- | 0     | 2.857 | 4 | 0.5821  |
| rs7125066   | 11 | 118721699 | G | A | -6.857 | 7.01E-12 | ---- | 37.1  | 9.534 | 4 | 0.04906 |
| rs9736016   | 11 | 118724894 | A | T | -6.849 | 7.44E-12 | ---- | 37.7  | 9.636 | 4 | 0.04703 |
| rs6589686   | 11 | 118612565 | A | G | -6.838 | 8.01E-12 | ---- | 0     | 1.526 | 4 | 0.8221  |
| rs10892273  | 11 | 118602809 | A | G | -6.828 | 8.63E-12 | ---- | 0     | 3.125 | 4 | 0.5371  |
| rs10892272  | 11 | 118602707 | G | C | -6.818 | 9.23E-12 | ---- | 0     | 3.202 | 4 | 0.5247  |
| rs11216997  | 11 | 118604638 | T | C | -6.814 | 9.50E-12 | ---- | 0     | 3.529 | 4 | 0.4734  |
| rs10892271  | 11 | 118598544 | A | G | -6.803 | 1.02E-11 | ---- | 0     | 2.818 | 4 | 0.5887  |
| rs112561833 | 11 | 118603736 | C | A | -6.783 | 1.18E-11 | ---- | 0     | 3.386 | 4 | 0.4954  |
| rs11216995  | 11 | 118603526 | A | G | -6.625 | 3.48E-11 | ---- | 0     | 3.202 | 4 | 0.5246  |
| rs11216994  | 11 | 118603520 | T | C | -6.621 | 3.58E-11 | ---- | 0     | 3.16  | 4 | 0.5315  |
| rs73001429  | 11 | 118603165 | G | T | -6.618 | 3.64E-11 | ---- | 0     | 3.086 | 4 | 0.5435  |
| rs11216993  | 11 | 118603495 | A | T | -6.592 | 4.33E-11 | ---- | 0     | 2.943 | 4 | 0.5674  |
| rs10892263  | 11 | 118587319 | C | T | -6.207 | 5.39E-10 | ---- | 0     | 3.738 | 4 | 0.4426  |
| rs12421790  | 11 | 118588952 | T | C | -6.141 | 8.21E-10 | ---- | 0     | 3.828 | 4 | 0.4298  |
| rs11216980  | 11 | 118590668 | A | C | -6.137 | 8.43E-10 | ---- | -38.4 | 4.334 | 4 | 0.3626  |
| rs10892262  | 11 | 118587097 | C | G | -6.029 | 1.65E-09 | ---- | 0     | 3.229 | 4 | 0.5203  |
| rs11216999  | 11 | 118604941 | C | T | -5.888 | 3.91E-09 | ---- | 0     | 2.966 | 4 | 0.5635  |
| rs12421793  | 11 | 118589012 | A | C | -5.854 | 4.80E-09 | ---- | 0     | 3.866 | 4 | 0.4244  |
| rs11216998  | 11 | 118604837 | T | C | -5.748 | 9.05E-09 | ---- | 0     | 3.11  | 4 | 0.5395  |
| rs11216972  | 11 | 118585826 | T | C | -5.717 | 1.08E-08 | ---- | 0     | 3.193 | 4 | 0.5261  |
| rs10892277  | 11 | 118605841 | A | G | -5.631 | 1.79E-08 | ---- | 0     | 2.995 | 4 | 0.5587  |
| rs10892274  | 11 | 118605463 | T | C | -5.604 | 2.10E-08 | ---- | 0     | 2.946 | 4 | 0.5669  |
| rs10892276  | 11 | 118605628 | A | G | -5.585 | 2.34E-08 | ---- | 0     | 3.047 | 4 | 0.55    |
| rs10892275  | 11 | 118605617 | A | T | -5.568 | 2.58E-08 | ---- | 0     | 2.928 | 4 | 0.57    |
| rs11216956  | 11 | 118575326 | A | G | -5.515 | 3.48E-08 | ---- | 0     | 2.338 | 4 | 0.6739  |
| rs11216960  | 11 | 118577873 | A | G | -5.412 | 6.24E-08 | ---- | 0     | 2.353 | 4 | 0.6712  |
| rs10790261  | 11 | 118579747 | G | A | -5.412 | 6.25E-08 | ---- | 0     | 2.181 | 4 | 0.7026  |
| rs10892260  | 11 | 118583525 | C | A | -5.404 | 6.50E-08 | ---- | 0     | 2.36  | 4 | 0.6698  |
| rs11216969  | 11 | 118584340 | C | T | -5.398 | 6.72E-08 | ---- | 0     | 2.222 | 4 | 0.695   |

|             |    |           |   |   |        |          |       |       |        |   |         |
|-------------|----|-----------|---|---|--------|----------|-------|-------|--------|---|---------|
| rs10892259  | 11 | 118583002 | A | G | -5.398 | 6.75E-08 | ----  | 0     | 2.121  | 4 | 0.7136  |
| rs10892256  | 11 | 118578705 | A | G | -5.393 | 6.94E-08 | ----  | 0     | 2.267  | 4 | 0.6869  |
| rs476246    | 11 | 118617920 | T | C | -5.385 | 7.23E-08 | ----  | 0     | 0.678  | 4 | 0.954   |
| rs10892257  | 11 | 118579327 | A | G | -5.376 | 7.61E-08 | ----  | 0     | 2.279  | 4 | 0.6845  |
| rs11216965  | 11 | 118582613 | A | C | -5.375 | 7.65E-08 | ----  | 0     | 2.271  | 4 | 0.6861  |
| rs472641    | 11 | 118617544 | G | A | -5.37  | 7.86E-08 | ----  | 0     | 0.652  | 4 | 0.9571  |
| rs10892258  | 11 | 118579865 | A | G | -5.364 | 8.16E-08 | ----  | 0     | 2.257  | 4 | 0.6886  |
| rs581062    | 11 | 118624767 | A | G | -5.361 | 8.29E-08 | ----  | 0     | 0.63   | 4 | 0.9596  |
| rs11216964  | 11 | 118581895 | A | G | -5.356 | 8.50E-08 | ----  | 0     | 2.296  | 4 | 0.6815  |
| rs11216961  | 11 | 118580338 | G | C | -5.353 | 8.67E-08 | ----  | 0     | 2.276  | 4 | 0.6851  |
| rs598373    | 11 | 118664377 | T | C | -5.32  | 1.04E-07 | ----  | 0     | 0.578  | 4 | 0.9655  |
| rs487728    | 11 | 118621495 | G | C | -5.31  | 1.10E-07 | ----  | 0     | 0.692  | 4 | 0.9523  |
| rs11216962  | 11 | 118580813 | C | T | -5.289 | 1.23E-07 | ----  | 0     | 2.151  | 4 | 0.7081  |
| rs11216963  | 11 | 118580814 | A | G | -5.289 | 1.23E-07 | ----  | 0     | 2.151  | 4 | 0.7081  |
| rs499343    | 11 | 118626511 | T | C | -5.282 | 1.28E-07 | ----  | 0     | 0.588  | 4 | 0.9644  |
| rs524590    | 11 | 118640063 | T | A | -5.268 | 1.38E-07 | ----  | 0     | 0.525  | 4 | 0.971   |
| rs688161    | 11 | 118677710 | G | A | -5.259 | 1.45E-07 | ----  | 0     | 0.549  | 4 | 0.9686  |
| rs2508570   | 11 | 118678609 | A | G | -5.247 | 1.55E-07 | ----  | 0     | 0.546  | 4 | 0.9689  |
| rs591756    | 11 | 118678881 | T | C | -5.231 | 1.69E-07 | ----  | 0     | 0.611  | 4 | 0.9619  |
| rs1784293   | 11 | 118652373 | C | A | -5.229 | 1.70E-07 | ----  | 0     | 0.725  | 4 | 0.9482  |
| rs477014    | 11 | 118678986 | C | T | -5.228 | 1.71E-07 | ----  | 0     | 0.702  | 4 | 0.9511  |
| rs1790189   | 11 | 118652326 | G | T | -5.219 | 1.79E-07 | ----  | 0     | 0.71   | 4 | 0.9501  |
| rs473298    | 11 | 118679387 | G | A | -5.216 | 1.83E-07 | ----  | 0     | 0.587  | 4 | 0.9645  |
| rs2508916   | 11 | 118654651 | G | C | -5.214 | 1.85E-07 | ----  | 0     | 0.869  | 4 | 0.9289  |
| rs516719    | 11 | 118679445 | C | T | -5.211 | 1.88E-07 | ----  | 0     | 0.578  | 4 | 0.9655  |
| rs2508569   | 11 | 118680045 | C | G | -5.191 | 2.09E-07 | ----  | 0     | 0.634  | 4 | 0.9593  |
| rs540180    | 11 | 118653629 | T | G | -5.189 | 2.11E-07 | ----  | 0     | 0.968  | 4 | 0.9146  |
| rs11606199  | 11 | 118811641 | A | G | -5.137 | 2.79E-07 | -?--- | 0     | 0.917  | 3 | 0.8213  |
| rs11217065  | 11 | 118726647 | C | T | 4.994  | 5.93E-07 | +++++ | -11.8 | 5.365  | 4 | 0.2519  |
| rs11217063  | 11 | 118725942 | C | G | 4.991  | 6.01E-07 | +++++ | -10.5 | 5.428  | 4 | 0.2461  |
| rs57719838  | 11 | 118724723 | C | T | 4.971  | 6.65E-07 | +++++ | -9.9  | 5.458  | 4 | 0.2435  |
| rs11217070  | 11 | 118729860 | G | T | 4.964  | 6.90E-07 | +++++ | -14.8 | 5.227  | 4 | 0.2648  |
| rs11217072  | 11 | 118731762 | G | A | 4.955  | 7.23E-07 | +++++ | -15.7 | 5.188  | 4 | 0.2686  |
| rs34561290  | 11 | 118731599 | T | C | 4.954  | 7.27E-07 | +++++ | -15.5 | 5.193  | 4 | 0.2681  |
| rs12790489  | 11 | 118729583 | C | T | 4.947  | 7.55E-07 | +++++ | -16   | 5.173  | 4 | 0.27    |
| rs10892300  | 11 | 118729210 | T | C | 4.946  | 7.56E-07 | +++++ | -16   | 5.174  | 4 | 0.2699  |
| rs7929520   | 11 | 118730141 | G | A | 4.915  | 8.89E-07 | +++++ | -12.9 | 5.316  | 4 | 0.2563  |
| rs7103067   | 11 | 118723379 | A | G | 4.909  | 9.14E-07 | +++++ | -8.2  | 5.545  | 4 | 0.2358  |
| rs10892319  | 11 | 118870413 | T | C | -4.861 | 1.17E-06 | -?--- | 0     | 1.712  | 3 | 0.6344  |
| rs571470    | 11 | 118697012 | A | G | -4.852 | 1.22E-06 | --+-  | 53.2  | 12.827 | 4 | 0.01215 |
| rs478081    | 11 | 118602497 | G | A | -4.838 | 1.31E-06 | ----  | 0     | 1.563  | 4 | 0.8154  |
| rs562059    | 11 | 118602058 | G | T | -4.832 | 1.36E-06 | ----  | 0     | 1.594  | 4 | 0.8099  |
| rs10790267  | 11 | 118727169 | T | C | 4.804  | 1.55E-06 | +++++ | -15.5 | 5.196  | 4 | 0.2678  |
| rs45586434  | 11 | 118828184 | A | C | -4.785 | 1.71E-06 | -?--- | 0     | 0.73   | 3 | 0.8662  |
| rs9645663   | 11 | 118873840 | C | T | -4.775 | 1.80E-06 | -?--- | 0     | 1.699  | 3 | 0.6371  |
| rs11217067  | 11 | 118727332 | T | G | 4.77   | 1.85E-06 | +++++ | -16.8 | 5.139  | 4 | 0.2733  |
| rs537080    | 11 | 118826045 | C | T | -4.764 | 1.90E-06 | -?--- | 0     | 1.029  | 3 | 0.7942  |
| rs4936442   | 11 | 118728320 | T | C | 4.756  | 1.97E-06 | +++++ | -19.7 | 5.014  | 4 | 0.2858  |
| rs7483509   | 11 | 118740180 | A | G | 4.742  | 2.12E-06 | +++++ | -25.4 | 4.783  | 4 | 0.3103  |
| rs112939258 | 11 | 118834718 | T | C | -4.733 | 2.21E-06 | -?--- | 0     | 1.138  | 3 | 0.7679  |
| rs73001406  | 11 | 118560857 | A | G | -4.73  | 2.24E-06 | ----  | 0     | 3.414  | 4 | 0.491   |
| rs10892316  | 11 | 118831755 | T | C | -4.709 | 2.49E-06 | -?--- | 0     | 1.193  | 3 | 0.7546  |
| rs507763    | 11 | 118824683 | C | G | -4.698 | 2.62E-06 | -?--- | 0     | 0.886  | 3 | 0.8288  |
| rs76253444  | 11 | 118876213 | G | A | -4.669 | 3.03E-06 | -?--- | 0     | 1.384  | 3 | 0.7093  |
| rs111358668 | 11 | 118834508 | A | G | -4.635 | 3.57E-06 | -?--- | 0     | 1.26   | 3 | 0.7387  |
| rs10892252  | 11 | 118555692 | G | A | -4.562 | 5.07E-06 | ----  | 0     | 3.677  | 4 | 0.4515  |

|             |    |           |   |   |        |           |       |       |       |   |         |
|-------------|----|-----------|---|---|--------|-----------|-------|-------|-------|---|---------|
| rs2277296   | 11 | 118550522 | C | T | -4.48  | 7.45E-06  | ----  | 0     | 3.907 | 4 | 0.4187  |
| rs4938617   | 11 | 118867695 | T | C | -4.476 | 7.59E-06  | -?--- | 0     | 2.722 | 3 | 0.4366  |
| rs622722    | 11 | 118711790 | A | G | 4.467  | 7.92E-06  | +++++ | -4.9  | 5.72  | 4 | 0.2211  |
| rs10892251  | 11 | 118543563 | T | C | -4.449 | 8.63E-06  | ----  | 0     | 3.771 | 4 | 0.4379  |
| rs113962716 | 11 | 118853021 | A | C | -4.421 | 9.81E-06  | -?--- | 0     | 1.439 | 3 | 0.6964  |
| rs11217109  | 11 | 118853774 | C | T | -4.41  | 1.04E-05  | -?--- | 0     | 1.42  | 3 | 0.7009  |
| rs80126726  | 11 | 118852647 | A | G | -4.397 | 1.10E-05  | -?--- | 0     | 1.554 | 3 | 0.6698  |
| rs74884652  | 11 | 118876552 | C | T | -4.319 | 1.57E-05  | -?--- | 0     | 2.346 | 3 | 0.5039  |
| rs11216943  | 11 | 118556398 | A | G | -4.27  | 1.96E-05  | ----  | -27.3 | 4.712 | 4 | 0.3181  |
| rs75154936  | 11 | 118877891 | C | T | -4.256 | 2.08E-05  | -?--- | 0     | 2.459 | 3 | 0.4828  |
| rs111345266 | 11 | 118893767 | T | C | -4.246 | 2.18E-05  | -?--- | 0     | 2.615 | 3 | 0.4549  |
| rs4938619   | 11 | 118890085 | T | C | -4.21  | 2.56E-05  | -?--- | 0     | 2.678 | 3 | 0.4439  |
| rs10892247  | 11 | 118490076 | A | G | -4.094 | 4.25E-05  | ----  | 0     | 3.59  | 4 | 0.4643  |
| rs4938576   | 11 | 118746769 | T | G | -4.043 | 5.28E-05  | ----  | 0     | 1.325 | 4 | 0.8571  |
| rs741811    | 11 | 118898319 | A | G | -3.983 | 6.80E-05  | -?--- | 0     | 1.18  | 3 | 0.7577  |
| rs496547    | 11 | 118576463 | A | T | -3.983 | 6.81E-05  | ----  | 0     | 1.747 | 4 | 0.7821  |
| rs11216937  | 11 | 118507478 | T | C | -3.973 | 7.10E-05  | ----  | 0     | 2.867 | 4 | 0.5803  |
| rs12362152  | 11 | 118516737 | G | A | -3.962 | 7.42E-05  | ----  | 0     | 2.949 | 4 | 0.5664  |
| rs80015904  | 11 | 118516903 | A | G | -3.953 | 7.71E-05  | ----  | 0     | 2.781 | 4 | 0.5951  |
| rs12365095  | 11 | 118516774 | T | C | -3.921 | 8.81E-05  | ----  | 0     | 2.699 | 4 | 0.6093  |
| rs11216938  | 11 | 118514625 | T | C | -3.919 | 8.91E-05  | ----  | 0     | 2.768 | 4 | 0.5974  |
| rs12225548  | 11 | 118535840 | G | C | -3.902 | 9.54E-05  | ----  | 0     | 2.894 | 4 | 0.5758  |
| rs17748     | 11 | 118528424 | T | C | -3.897 | 9.75E-05  | ----  | 0     | 2.734 | 4 | 0.6032  |
| rs77683570  | 11 | 118495287 | C | T | -3.89  | 0.0001003 | ----  | 0     | 3.016 | 4 | 0.5552  |
| rs10790256  | 11 | 118534082 | T | C | -3.886 | 0.000102  | ----  | 0     | 2.748 | 4 | 0.6008  |
| rs7928371   | 11 | 118529127 | A | G | -3.886 | 0.000102  | ----  | 0     | 2.747 | 4 | 0.6011  |
| rs11216930  | 11 | 118488782 | C | A | -3.883 | 0.0001033 | ----  | 0     | 2.183 | 4 | 0.7021  |
| rs45540840  | 11 | 118486110 | A | G | -3.872 | 0.0001079 | ----  | 0     | 2.807 | 4 | 0.5905  |
| rs2236661   | 11 | 118499394 | G | C | -3.859 | 0.0001138 | ----  | 0     | 2.873 | 4 | 0.5793  |
| rs45565037  | 11 | 118496119 | A | G | -3.848 | 0.0001189 | ----  | 0     | 2.979 | 4 | 0.5613  |
| rs11217099  | 11 | 118809882 | A | C | -3.837 | 0.0001245 | -+--- | 8.6   | 6.567 | 4 | 0.1606  |
| rs2276065   | 11 | 118530611 | C | T | -3.826 | 0.00013   | ----  | 0     | 3.239 | 4 | 0.5186  |
| rs75438046  | 11 | 118767564 | A | G | -3.815 | 0.0001364 | -+--? | 29.7  | 7.113 | 3 | 0.06838 |
| rs78041268  | 11 | 118763313 | A | G | -3.806 | 0.000141  | -+--? | 23.7  | 6.556 | 3 | 0.08749 |
| rs10892306  | 11 | 118751326 | A | T | -3.761 | 0.000169  | ----  | 0     | 2.609 | 4 | 0.6252  |
| rs77841686  | 11 | 118762073 | A | G | -3.758 | 0.0001711 | -+--? | 21.9  | 6.4   | 3 | 0.09369 |
| rs10892248  | 11 | 118501022 | A | G | -3.742 | 0.0001824 | ----  | 0     | 2.783 | 4 | 0.5948  |
| rs149114341 | 11 | 118783424 | A | G | -3.714 | 0.0002041 | -+--? | 22.4  | 6.444 | 3 | 0.09192 |
| rs546393    | 11 | 118624250 | C | T | 3.609  | 0.0003075 | +++++ | 1.2   | 6.07  | 4 | 0.194   |
| rs488219    | 11 | 118620697 | C | T | 3.6    | 0.0003185 | +++++ | 0.9   | 6.055 | 4 | 0.1951  |
| rs10790255  | 11 | 118515579 | G | T | -3.574 | 0.0003517 | ----  | 0     | 2.361 | 4 | 0.6698  |
| rs555639    | 11 | 118629031 | A | G | 3.555  | 0.000378  | +++++ | -5.5  | 5.686 | 4 | 0.2238  |
| rs607125    | 11 | 118617299 | C | T | 3.544  | 0.0003943 | +++++ | 2     | 6.12  | 4 | 0.1904  |
| rs573905    | 11 | 118572267 | A | G | 3.54   | 0.0004007 | +++++ | 0     | 1.888 | 4 | 0.7564  |
| rs581045    | 11 | 118632522 | T | C | 3.532  | 0.0004126 | +++++ | -9.4  | 5.485 | 4 | 0.2411  |
| rs586763    | 11 | 118816304 | T | C | -3.52  | 0.0004308 | -?--- | 0     | 0.723 | 3 | 0.8678  |
| rs555649    | 11 | 118651809 | C | T | 3.52   | 0.0004316 | +++++ | -16.4 | 5.156 | 4 | 0.2717  |
| rs11217091  | 11 | 118793613 | C | T | -3.517 | 0.0004362 | -+--- | 17.5  | 7.27  | 4 | 0.1223  |
| rs2510897   | 11 | 118644582 | C | A | 3.491  | 0.000482  | +++++ | -17.5 | 5.106 | 4 | 0.2766  |
| rs2105782   | 11 | 118659896 | C | T | 3.47   | 0.0005213 | +++++ | -13.8 | 5.272 | 4 | 0.2605  |
| rs515523    | 11 | 118658075 | G | A | 3.468  | 0.0005252 | +++++ | -6    | 5.661 | 4 | 0.226   |
| rs1784543   | 11 | 118631653 | T | A | 3.467  | 0.0005257 | +++++ | -6.1  | 5.657 | 4 | 0.2263  |
| rs507890    | 11 | 118631288 | C | T | 3.46   | 0.0005396 | +++++ | -7    | 5.607 | 4 | 0.2305  |
| rs4938513   | 11 | 118419704 | T | C | -3.449 | 0.000562  | ----? | 0     | 1.628 | 3 | 0.6532  |
| rs607472    | 11 | 118680072 | G | C | 3.433  | 0.0005972 | +++++ | -7    | 5.608 | 4 | 0.2304  |
| rs566733    | 11 | 118608625 | G | C | 3.419  | 0.0006288 | +++++ | 3.7   | 6.229 | 4 | 0.1827  |

|             |    |           |   |   |        |           |        |       |        |   |          |
|-------------|----|-----------|---|---|--------|-----------|--------|-------|--------|---|----------|
| rs567680    | 11 | 118608532 | G | C | 3.389  | 0.0007017 | +++    | 7.7   | 6.498  | 4 | 0.1649   |
| rs1784300   | 11 | 118679629 | T | A | 3.383  | 0.0007173 | +++    | -12.6 | 5.328  | 4 | 0.2553   |
| rs632124    | 11 | 118613235 | A | T | 3.374  | 0.0007416 | +++    | 7.8   | 6.508  | 4 | 0.1643   |
| rs11217004  | 11 | 118607622 | A | G | 3.354  | 0.0007965 | +++    | 6.8   | 6.437  | 4 | 0.1688   |
| rs11217078  | 11 | 118750321 | C | T | -3.346 | 0.000821  | -?+--  | 53.1  | 10.654 | 3 | 0.01375  |
| rs11217090  | 11 | 118789952 | T | C | -3.343 | 0.0008293 | +---   | -3    | 5.823  | 4 | 0.2127   |
| rs12796102  | 11 | 118662028 | T | C | 3.309  | 0.0009369 | +++    | -24.4 | 4.824  | 4 | 0.3058   |
| rs633308    | 11 | 118459069 | G | A | -3.277 | 0.001049  | ----?  | 0     | 1.276  | 3 | 0.7347   |
| rs112119822 | 11 | 118798824 | G | A | -3.276 | 0.001052  | +---   | -11   | 5.404  | 4 | 0.2483   |
| rs12280501  | 11 | 118801440 | T | C | -3.26  | 0.001115  | +---   | -10.7 | 5.423  | 4 | 0.2466   |
| rs7101680   | 11 | 118799206 | A | G | -3.258 | 0.001122  | +---   | -10.8 | 5.417  | 4 | 0.2471   |
| rs4291686   | 11 | 118700557 | G | A | 3.207  | 0.001341  | +++?+  | -15.7 | 4.321  | 3 | 0.2289   |
| rs625274    | 11 | 118699276 | T | C | 3.185  | 0.001445  | +++?+  | -19.5 | 4.186  | 3 | 0.2421   |
| rs4936459   | 11 | 118899218 | T | C | -3.146 | 0.001652  | +---   | -44.2 | 4.161  | 4 | 0.3846   |
| rs77638281  | 11 | 118811315 | A | G | -3.12  | 0.001807  | -?---  | 0     | 0.618  | 3 | 0.8924   |
| rs112974653 | 11 | 118807637 | T | G | -3.076 | 0.0021    | -?---  | 0     | 1.164  | 3 | 0.7616   |
| rs4938589   | 11 | 118810405 | T | C | -3.067 | 0.002164  | -?---  | 0     | 1.255  | 3 | 0.7398   |
| rs10892313  | 11 | 118809329 | A | G | -3.066 | 0.002169  | -?---  | 0     | 0.928  | 3 | 0.8187   |
| rs11605265  | 11 | 118805144 | A | G | -3.057 | 0.002234  | -?---  | 0     | 0.405  | 3 | 0.9392   |
| rs542266    | 11 | 118422240 | A | C | -3.055 | 0.002247  | ----?  | 0     | 1.458  | 3 | 0.6919   |
| rs11600378  | 11 | 118803842 | G | A | -3.044 | 0.002333  | -?---  | 0     | 0.436  | 3 | 0.9327   |
| rs11605658  | 11 | 118805220 | T | C | -3.036 | 0.002397  | -?---  | 0     | 0.369  | 3 | 0.9465   |
| rs143711539 | 11 | 118804671 | A | G | -3.036 | 0.0024    | -?---  | 0     | 0.417  | 3 | 0.9367   |
| rs10892312  | 11 | 118807740 | A | G | -3.026 | 0.002476  | -?---  | 0     | 1.023  | 3 | 0.7956   |
| rs12282154  | 11 | 118807876 | A | G | -3.023 | 0.002503  | -?---  | 0     | 1.01   | 3 | 0.7987   |
| rs77916839  | 11 | 118798780 | C | G | -3.009 | 0.00262   | -?---  | 0     | 0.267  | 3 | 0.966    |
| rs7117408   | 11 | 118808140 | T | C | -2.999 | 0.002712  | -?---  | 0     | 0.996  | 3 | 0.8023   |
| rs117235696 | 11 | 118803193 | G | T | -2.971 | 0.002973  | -?---  | 0     | 0.613  | 3 | 0.8934   |
| rs3176905   | 11 | 118755630 | C | T | -2.917 | 0.003539  | ----+  | 52    | 12.498 | 4 | 0.01401  |
| rs687190    | 11 | 118542383 | C | T | 2.914  | 0.003569  | +++++  | 0     | 3.481  | 4 | 0.4808   |
| rs55772432  | 11 | 118805385 | A | G | 2.91   | 0.003619  | +?+++? | -29.1 | 3.098  | 2 | 0.2124   |
| rs10892307  | 11 | 118754649 | G | C | -2.909 | 0.003621  | ----+  | 55.4  | 13.452 | 4 | 0.009267 |
| rs10892310  | 11 | 118806897 | T | C | 2.893  | 0.00381   | +----  | 39.9  | 9.989  | 4 | 0.04062  |
| rs71482159  | 11 | 118809204 | T | C | -2.884 | 0.003922  | -?-??  | 0     | 0.012  | 1 | 0.9136   |
| rs2886599   | 11 | 72721271  | A | C | 2.849  | 0.004384  | +++++  | 24    | 7.891  | 4 | 0.09564  |
| rs150792202 | 11 | 118652569 | A | G | 2.847  | 0.004416  | +?+++  | -2.2  | 4.894  | 3 | 0.1797   |
| rs633683    | 11 | 118504742 | T | C | 2.834  | 0.004602  | +?+++  | -30.1 | 3.843  | 3 | 0.2789   |
| rs77280285  | 11 | 118091258 | G | C | 2.833  | 0.004615  | +?+++  | 1.6   | 5.082  | 3 | 0.1659   |
| rs11216934  | 11 | 118501459 | A | G | 2.823  | 0.004753  | +?+++  | 0     | 1.773  | 3 | 0.6207   |
| rs506234    | 11 | 118540104 | G | C | 2.801  | 0.005097  | +++++  | 0     | 2.962  | 4 | 0.5642   |
| rs483598    | 11 | 118509668 | A | G | 2.795  | 0.005186  | +?+++  | 0     | 1.694  | 3 | 0.6383   |
| rs527619    | 11 | 118563286 | A | G | 2.788  | 0.00531   | +++++  | 0     | 3.013  | 4 | 0.5556   |
| rs8301      | 11 | 118895495 | G | C | -2.778 | 0.005464  | -?---  | 0     | 0.833  | 3 | 0.8417   |
| rs76675432  | 11 | 118103976 | T | C | 2.77   | 0.005609  | +?+++  | 1.2   | 5.063  | 3 | 0.1672   |
| rs577396    | 11 | 118499469 | C | G | 2.766  | 0.005683  | +?+++  | 0     | 1.671  | 3 | 0.6434   |
| rs4558175   | 11 | 118872581 | A | G | -2.742 | 0.006115  | -?---  | 0     | 0.558  | 3 | 0.9059   |
| rs540800    | 11 | 118565651 | A | G | 2.741  | 0.006123  | +++++  | 0     | 3.274  | 4 | 0.5131   |
| rs523604    | 11 | 118755738 | G | A | -2.732 | 0.006299  | ----   | 0     | 2.067  | 4 | 0.7235   |
| rs11605166  | 11 | 72669777  | C | T | 2.728  | 0.006367  | +++++  | 30.2  | 8.592  | 4 | 0.07214  |
| rs3132828   | 11 | 118431003 | A | G | -2.693 | 0.007082  | ----?  | 0     | 1.776  | 3 | 0.6202   |
| rs10892320  | 11 | 118873385 | T | C | -2.687 | 0.00722   | -?---  | 0     | 0.476  | 3 | 0.9242   |
| rs76793820  | 11 | 72619860  | A | G | 2.666  | 0.00767   | +++++  | 27.3  | 8.256  | 4 | 0.08264  |
| rs680465    | 11 | 118500963 | A | G | 2.657  | 0.007885  | +?+++  | 35.3  | 7.728  | 3 | 0.05197  |
| rs7936556   | 11 | 118501299 | A | G | 2.654  | 0.007957  | +?+++  | 0     | 1.542  | 3 | 0.6726   |
| rs4245184   | 11 | 118510562 | A | G | 2.65   | 0.008057  | +?+++  | 0     | 1.483  | 3 | 0.6863   |
| rs644273    | 11 | 118511352 | T | C | 2.649  | 0.008082  | +?+++  | 0     | 1.482  | 3 | 0.6865   |

|             |    |           |   |   |        |          |       |       |        |   |          |
|-------------|----|-----------|---|---|--------|----------|-------|-------|--------|---|----------|
| rs11820805  | 11 | 118888831 | C | T | -2.646 | 0.008138 | -?--- | 0     | 0.339  | 3 | 0.9526   |
| rs6589713   | 11 | 118872404 | C | T | -2.645 | 0.008166 | -?--- | 0     | 0.718  | 3 | 0.8689   |
| rs2508573   | 11 | 118555383 | T | C | 2.629  | 0.008552 | +++++ | 0     | 3.483  | 4 | 0.4804   |
| rs7129793   | 11 | 72455885  | T | C | 2.628  | 0.0086   | +++++ | 20.8  | 7.574  | 4 | 0.1085   |
| rs4938618   | 11 | 118867803 | C | G | -2.626 | 0.00863  | -?--- | 0     | 0.986  | 3 | 0.8048   |
| rs654423    | 11 | 118511757 | A | G | 2.625  | 0.008661 | +?+++ | 0     | 1.463  | 3 | 0.6908   |
| rs11602858  | 11 | 72615069  | G | C | 2.624  | 0.008684 | +++++ | 25.7  | 8.072  | 4 | 0.08898  |
| rs11603023  | 11 | 118486067 | T | C | 2.623  | 0.008725 | +?+++ | 0     | 1.589  | 3 | 0.662    |
| rs583213    | 11 | 118669178 | G | T | 2.619  | 0.00881  | +?--+ | 15.8  | 5.939  | 3 | 0.1146   |
| rs4573680   | 11 | 118872741 | C | T | -2.614 | 0.008955 | -?--- | 0     | 1.011  | 3 | 0.7986   |
| rs7113753   | 11 | 118889378 | A | G | -2.613 | 0.008968 | -?--- | 0     | 0.394  | 3 | 0.9414   |
| rs75896506  | 11 | 72429579  | A | G | 2.611  | 0.009033 | +++++ | -1.3  | 5.92   | 4 | 0.2052   |
| rs494560    | 11 | 118521549 | A | G | 2.601  | 0.009284 | +?+++ | 0     | 1.47   | 3 | 0.6892   |
| rs947931    | 11 | 118577614 | G | T | -2.596 | 0.009421 | ---?- | 0     | 2.673  | 3 | 0.4448   |
| rs11600585  | 11 | 72727840  | G | A | 2.595  | 0.00946  | +++++ | 12.6  | 6.867  | 4 | 0.1431   |
| rs576950    | 11 | 118391375 | G | A | -2.591 | 0.009559 | ----? | 16.9  | 6.016  | 3 | 0.1108   |
| rs11602393  | 11 | 118750967 | A | T | -2.591 | 0.009573 | ----+ | 50.9  | 12.227 | 4 | 0.01574  |
| rs11602764  | 11 | 118888619 | G | A | -2.59  | 0.009603 | -?--- | 0     | 0.286  | 3 | 0.9627   |
| rs11603334  | 11 | 72432985  | A | G | 2.584  | 0.009773 | +++++ | -1.3  | 5.923  | 4 | 0.2049   |
| rs74333814  | 11 | 72457487  | T | C | 2.582  | 0.009817 | +++++ | 17.5  | 7.277  | 4 | 0.1219   |
| rs11822103  | 11 | 118869539 | A | G | -2.578 | 0.009952 | -?--- | 0     | 0.996  | 3 | 0.8023   |
| rs10898880  | 11 | 72525111  | A | C | -2.559 | 0.01049  | ----  | 0     | 0.489  | 4 | 0.9746   |
| rs1552224   | 11 | 72433098  | C | A | 2.556  | 0.01058  | +++++ | 0.1   | 6.007  | 4 | 0.1987   |
| rs79769393  | 11 | 72080610  | A | G | 2.55   | 0.01078  | +++?+ | 0     | 2.982  | 3 | 0.3944   |
| rs35668754  | 11 | 72523110  | C | T | -2.549 | 0.0108   | ----  | 0     | 0.52   | 4 | 0.9715   |
| rs145398037 | 11 | 72522142  | C | G | 2.542  | 0.01102  | +++++ | 31.5  | 8.763  | 4 | 0.06731  |
| rs74891547  | 11 | 118811878 | C | G | -2.541 | 0.01107  | -?--- | 0     | 1.917  | 3 | 0.5898   |
| rs10751216  | 11 | 72526123  | T | C | -2.537 | 0.01117  | ----  | 0     | 0.605  | 4 | 0.9625   |
| rs35343925  | 11 | 72523349  | T | A | -2.534 | 0.01128  | ----  | 0     | 0.557  | 4 | 0.9677   |
| rs6592490   | 11 | 72519756  | C | A | -2.532 | 0.01133  | ----  | 0     | 0.567  | 4 | 0.9667   |
| rs74236665  | 11 | 72080895  | G | C | 2.53   | 0.01141  | +++?+ | -66   | 3.013  | 3 | 0.3897   |
| rs77398170  | 11 | 118792278 | G | A | -2.528 | 0.01147  | -?--- | 0     | 1.516  | 3 | 0.6786   |
| rs35752694  | 11 | 72522881  | A | G | -2.528 | 0.01149  | ----  | 0     | 0.541  | 4 | 0.9694   |
| rs525549    | 11 | 118358068 | A | T | -2.524 | 0.01161  | ----? | -12.8 | 4.431  | 3 | 0.2185   |
| rs7109082   | 11 | 72707441  | C | A | 2.524  | 0.01161  | +++++ | 8.4   | 6.55   | 4 | 0.1617   |
| rs1975109   | 11 | 72519217  | G | C | -2.523 | 0.01164  | ----  | 0     | 0.544  | 4 | 0.9691   |
| rs79577700  | 11 | 72057385  | G | A | 2.521  | 0.01169  | +++?+ | 0     | 2.981  | 3 | 0.3946   |
| rs79549196  | 11 | 72057384  | T | C | 2.521  | 0.0117   | +++?+ | 0     | 2.981  | 3 | 0.3946   |
| rs4944805   | 11 | 72522262  | G | T | -2.516 | 0.01188  | ----  | 0     | 0.549  | 4 | 0.9686   |
| rs577121    | 11 | 118690550 | C | T | 2.515  | 0.01192  | +?--+ | 27.9  | 6.938  | 3 | 0.07389  |
| rs7110719   | 11 | 72521286  | C | T | -2.514 | 0.01192  | ----  | 0     | 0.55   | 4 | 0.9684   |
| rs10751215  | 11 | 72526087  | C | T | -2.512 | 0.01199  | ----  | 0     | 0.504  | 4 | 0.9731   |
| rs75665552  | 11 | 72046487  | C | T | 2.512  | 0.012    | +++?+ | 0     | 2.984  | 3 | 0.3941   |
| rs117117171 | 11 | 118152252 | A | T | 2.511  | 0.01202  | +?+++ | 0.5   | 5.027  | 3 | 0.1698   |
| rs538645    | 11 | 118711069 | C | T | 2.508  | 0.01214  | +++++ | 0     | 1.692  | 4 | 0.7921   |
| rs79658353  | 11 | 72064041  | A | G | 2.508  | 0.01214  | +++?+ | -66.5 | 3.003  | 3 | 0.3911   |
| rs78639187  | 11 | 72071641  | T | C | 2.505  | 0.01226  | +++?+ | 0     | 1.852  | 3 | 0.6037   |
| rs117819392 | 11 | 72514503  | T | C | 2.502  | 0.01234  | +++++ | 27.4  | 8.269  | 4 | 0.08222  |
| rs139534838 | 11 | 72506880  | C | T | 2.502  | 0.01236  | +++++ | 30.9  | 8.682  | 4 | 0.06956  |
| rs587816    | 11 | 118689871 | A | C | 2.502  | 0.01237  | +?--+ | 29.4  | 7.086  | 3 | 0.0692   |
| rs9645708   | 11 | 72819318  | C | T | 2.502  | 0.01237  | +++-- | 23.4  | 7.829  | 4 | 0.09805  |
| rs58941166  | 11 | 72083441  | A | G | 2.499  | 0.01244  | +++?- | -54.1 | 3.245  | 3 | 0.3554   |
| rs1059000   | 11 | 72504972  | C | G | 2.497  | 0.01252  | +++++ | 30    | 8.576  | 4 | 0.07263  |
| rs12282752  | 11 | 118793918 | C | T | -2.497 | 0.01252  | -?--- | 0     | 1.557  | 3 | 0.6693   |
| rs7943247   | 11 | 72881957  | G | A | -2.497 | 0.01252  | ---+- | 58.2  | 14.364 | 4 | 0.006221 |
| rs3737504   | 11 | 118869460 | G | A | -2.497 | 0.01253  | -?--- | 0     | 1.102  | 3 | 0.7765   |

|             |    |           |   |   |        |         |       |      |       |   |         |
|-------------|----|-----------|---|---|--------|---------|-------|------|-------|---|---------|
| rs7103836   | 11 | 72474571  | C | G | 2.492  | 0.01272 | ++++  | 14.4 | 7.01  | 4 | 0.1353  |
| rs11235596  | 11 | 72514163  | G | A | -2.488 | 0.01286 | ----  | 0    | 0.499 | 4 | 0.9736  |
| rs4936457   | 11 | 118875727 | G | A | -2.487 | 0.0129  | -?--- | 0    | 0.833 | 3 | 0.8416  |
| rs10793057  | 11 | 72968660  | A | G | 2.484  | 0.013   | ++++? | 0    | 0.192 | 3 | 0.9789  |
| rs668628    | 11 | 118519213 | T | G | 2.484  | 0.01301 | +?++  | 36.7 | 7.896 | 3 | 0.04822 |
| rs9645664   | 11 | 118873987 | C | T | -2.483 | 0.01301 | ----  | 0    | 1.455 | 4 | 0.8346  |
| rs583905    | 11 | 118695908 | G | A | 2.481  | 0.0131  | +?++  | 21.9 | 6.402 | 3 | 0.09361 |
| rs4936458   | 11 | 118875761 | G | T | -2.479 | 0.01318 | -?--- | 0    | 0.815 | 3 | 0.8458  |
| rs7105187   | 11 | 118887581 | T | C | -2.479 | 0.01319 | -?--- | 0    | 0.744 | 3 | 0.8629  |
| rs7933859   | 11 | 118662045 | T | C | 2.475  | 0.01334 | +?++  | 12.4 | 5.708 | 3 | 0.1267  |
| rs613937    | 11 | 72474839  | G | A | 2.474  | 0.01337 | ++++  | 20.3 | 7.532 | 4 | 0.1103  |
| rs111491960 | 11 | 118833458 | G | A | 2.472  | 0.01342 | +-+?  | -7.3 | 4.661 | 3 | 0.1984  |
| rs4508234   | 11 | 118662203 | G | C | 2.466  | 0.01368 | +?++  | 12   | 5.685 | 3 | 0.128   |
| rs494459    | 11 | 118574675 | T | C | 2.453  | 0.01416 | +++   | -5.2 | 5.705 | 4 | 0.2223  |
| rs543692    | 11 | 118598138 | C | T | 2.452  | 0.0142  | +++   | 0.7  | 6.044 | 4 | 0.1959  |
| rs500254    | 11 | 118678780 | G | A | 2.449  | 0.01431 | +?++  | 11.7 | 5.66  | 3 | 0.1294  |
| rs3916582   | 11 | 118887888 | T | C | -2.443 | 0.01457 | -?--- | 0    | 0.887 | 3 | 0.8287  |
| rs10898877  | 11 | 72511021  | G | A | -2.442 | 0.01459 | ----  | 0    | 0.394 | 4 | 0.983   |
| rs7952617   | 11 | 72516946  | C | T | -2.441 | 0.01464 | ----  | 0    | 0.768 | 4 | 0.9426  |
| rs584935    | 11 | 118696175 | A | G | 2.44   | 0.01468 | +?++  | 23.2 | 6.51  | 3 | 0.08926 |
| rs626645    | 11 | 118575180 | C | T | 2.44   | 0.01469 | +++   | -5.9 | 5.665 | 4 | 0.2256  |
| rs10751213  | 11 | 72510644  | A | C | -2.439 | 0.01473 | ----  | 0    | 0.387 | 4 | 0.9835  |
| rs524409    | 11 | 118574311 | T | C | 2.439  | 0.01473 | +++   | -2.8 | 5.834 | 4 | 0.2119  |
| rs6592489   | 11 | 72510180  | C | G | -2.439 | 0.01475 | ----  | 0    | 0.386 | 4 | 0.9836  |
| rs11217125  | 11 | 118889185 | C | T | -2.437 | 0.01483 | -?--- | 0    | 1     | 3 | 0.8012  |
| rs1000620   | 11 | 72509713  | A | G | -2.435 | 0.01487 | ----  | 0    | 0.38  | 4 | 0.9841  |
| rs7937334   | 11 | 118191274 | T | C | 2.435  | 0.01491 | +?+-  | 20.5 | 6.288 | 3 | 0.0984  |
| rs4459332   | 11 | 72508267  | C | T | -2.434 | 0.01495 | ----  | 0    | 0.38  | 4 | 0.9841  |
| rs2276423   | 11 | 118210106 | G | C | 2.433  | 0.01496 | +?+-  | 25.6 | 6.721 | 3 | 0.08134 |
| rs677231    | 11 | 72504848  | A | T | -2.433 | 0.01499 | ----  | 0    | 0.37  | 4 | 0.9848  |
| rs4944800   | 11 | 72506130  | C | T | -2.431 | 0.01504 | ----  | 0    | 0.368 | 4 | 0.985   |
| rs582200    | 11 | 118668908 | G | A | 2.43   | 0.0151  | +?++  | 13.5 | 5.777 | 3 | 0.123   |
| rs4938544   | 11 | 118665009 | A | G | 2.429  | 0.01513 | +?++  | 10.6 | 5.595 | 3 | 0.133   |
| rs59095933  | 11 | 118885161 | A | G | -2.427 | 0.01524 | -?--- | 0    | 0.661 | 3 | 0.8822  |
| rs78882064  | 11 | 72084480  | A | C | 2.426  | 0.01525 | +++?  | 0    | 2.427 | 3 | 0.4886  |
| rs17244499  | 11 | 72629946  | G | A | 2.421  | 0.01546 | ++++  | 21.3 | 7.624 | 4 | 0.1064  |
| rs625735    | 11 | 118575419 | A | G | 2.421  | 0.01547 | +++   | -2.9 | 5.833 | 4 | 0.212   |
| rs4459331   | 11 | 72507938  | C | T | -2.419 | 0.01555 | ----  | 0    | 0.389 | 4 | 0.9834  |
| rs637563    | 11 | 118575479 | G | A | 2.417  | 0.01563 | +++   | -2.3 | 5.867 | 4 | 0.2093  |
| rs638514    | 11 | 118575693 | C | T | 2.417  | 0.01564 | +++   | -2.2 | 5.87  | 4 | 0.2091  |
| rs2276071   | 11 | 118896116 | C | A | -2.416 | 0.01567 | ----  | 0    | 1.385 | 4 | 0.8468  |
| rs12271856  | 11 | 118791532 | T | G | -2.416 | 0.01569 | -?--- | 0    | 1.92  | 3 | 0.5892  |
| rs4938506   | 11 | 118205702 | A | G | 2.415  | 0.01571 | +?+-  | 23   | 6.497 | 3 | 0.0898  |
| rs530901    | 11 | 118575011 | C | T | 2.415  | 0.01575 | +++   | -0.1 | 5.993 | 4 | 0.1997  |
| rs113611963 | 11 | 118839610 | G | T | 2.411  | 0.01591 | +-+?  | -11  | 4.505 | 3 | 0.2118  |
| rs568688    | 11 | 118598612 | G | T | 2.41   | 0.01596 | +++   | -2.7 | 5.84  | 4 | 0.2114  |
| rs11217124  | 11 | 118889132 | G | A | -2.409 | 0.01598 | -?--- | 0    | 0.94  | 3 | 0.8157  |
| rs576283    | 11 | 118573894 | G | A | 2.408  | 0.01602 | +++   | -1.4 | 5.918 | 4 | 0.2053  |
| rs10431171  | 11 | 72512271  | C | G | -2.406 | 0.01612 | ----  | 0    | 0.479 | 4 | 0.9755  |
| rs627391    | 11 | 118573916 | T | A | 2.401  | 0.01636 | +++   | -1.8 | 5.892 | 4 | 0.2073  |
| rs10431172  | 11 | 72512630  | T | C | -2.399 | 0.01645 | ----  | 0    | 0.484 | 4 | 0.9751  |
| rs4944802   | 11 | 72510476  | G | A | -2.398 | 0.0165  | ----  | 0    | 0.452 | 4 | 0.978   |
| rs58601794  | 11 | 118884726 | C | T | -2.397 | 0.01654 | -?--- | 0    | 0.727 | 3 | 0.8668  |
| rs603486    | 11 | 118587347 | T | C | 2.394  | 0.01669 | +++?  | 0    | 1.661 | 3 | 0.6457  |
| rs3814730   | 11 | 72555553  | A | G | 2.392  | 0.01674 | ++++  | 25.4 | 8.039 | 4 | 0.09016 |
| rs75610917  | 11 | 72011276  | A | G | 2.392  | 0.01676 | +++?  | 0    | 2.225 | 3 | 0.527   |

|             |    |           |   |   |        |         |       |       |       |   |         |
|-------------|----|-----------|---|---|--------|---------|-------|-------|-------|---|---------|
| rs2303969   | 11 | 72536272  | A | G | 2.391  | 0.01681 | +++   | 28.3  | 8.366 | 4 | 0.07904 |
| rs75219483  | 11 | 72008410  | T | C | 2.391  | 0.01681 | +++?  | 0     | 2.224 | 3 | 0.5273  |
| rs3862791   | 11 | 72501002  | T | C | 2.389  | 0.01691 | ++++  | 25.4  | 8.048 | 4 | 0.08983 |
| rs5006102   | 11 | 118662340 | A | T | 2.386  | 0.01704 | +?++  | 15.1  | 5.887 | 3 | 0.1172  |
| rs563537    | 11 | 118595207 | A | T | 2.384  | 0.01712 | +++?  | 8.4   | 5.457 | 3 | 0.1412  |
| rs11235592  | 11 | 72501277  | C | G | -2.383 | 0.01718 | ----  | 0     | 0.327 | 4 | 0.988   |
| rs516503    | 11 | 118580348 | T | C | 2.382  | 0.01722 | ++++  | -8.7  | 5.521 | 4 | 0.2379  |
| rs6592486   | 11 | 72508609  | A | G | -2.381 | 0.01726 | ----  | 0     | 0.396 | 4 | 0.9828  |
| rs2276072   | 11 | 118896115 | G | A | -2.38  | 0.01729 | ----  | 0     | 1.326 | 4 | 0.8569  |
| rs59608621  | 11 | 118885163 | G | A | -2.379 | 0.01735 | -?--- | 0     | 0.784 | 3 | 0.8533  |
| rs675003    | 11 | 118677083 | T | C | 2.378  | 0.01738 | +?++  | 11.7  | 5.661 | 3 | 0.1293  |
| rs79430446  | 11 | 72474004  | T | G | 2.378  | 0.01739 | ++++  | 9.8   | 6.649 | 4 | 0.1556  |
| rs11235594  | 11 | 72503735  | G | A | -2.378 | 0.0174  | ----  | 0     | 0.353 | 4 | 0.9861  |
| rs61381062  | 11 | 118884708 | A | G | -2.37  | 0.01777 | -?--- | 0     | 0.74  | 3 | 0.8637  |
| rs12294466  | 11 | 118789657 | T | C | -2.37  | 0.01779 | +-?   | -28.4 | 3.893 | 3 | 0.2732  |
| rs1864653   | 11 | 72503293  | A | G | -2.369 | 0.01781 | ----  | 0     | 0.376 | 4 | 0.9844  |
| rs496058    | 11 | 118580906 | G | A | 2.363  | 0.01812 | ++++  | -10.6 | 5.426 | 4 | 0.2463  |
| rs61901411  | 11 | 118665324 | T | C | 2.363  | 0.01813 | +?++  | 18.9  | 6.164 | 3 | 0.1039  |
| rs11216919  | 11 | 118462367 | G | A | 2.353  | 0.01862 | ++++? | 0     | 0.788 | 3 | 0.8524  |
| rs57275811  | 11 | 72127872  | G | T | 2.352  | 0.01869 | +++?  | 0     | 2.55  | 3 | 0.4664  |
| rs11235612  | 11 | 72613273  | G | A | 2.35   | 0.01876 | ++++  | 37.3  | 9.573 | 4 | 0.04827 |
| rs12270280  | 11 | 118791150 | T | C | -2.349 | 0.01883 | -?--- | 0     | 2.141 | 3 | 0.5437  |
| rs7109575   | 11 | 72463435  | A | G | 2.34   | 0.0193  | ++++  | 28    | 8.328 | 4 | 0.08026 |
| rs74439784  | 11 | 72649396  | T | A | 2.339  | 0.01931 | ++++  | 21    | 7.593 | 4 | 0.1077  |
| rs75184960  | 11 | 72141222  | A | C | 2.338  | 0.01938 | +++?  | 0     | 2.494 | 3 | 0.4765  |
| rs11235550  | 11 | 72331050  | C | T | 2.337  | 0.01942 | +?+++ | 0     | 1.541 | 3 | 0.6729  |
| rs485099    | 11 | 72500060  | C | T | -2.334 | 0.01957 | ----  | 0     | 0.322 | 4 | 0.9884  |
| rs4944797   | 11 | 72500072  | T | G | -2.329 | 0.01987 | ----  | 0     | 0.341 | 4 | 0.987   |
| rs12274090  | 11 | 72512097  | T | C | -2.325 | 0.02006 | +-+   | 23.4  | 7.834 | 4 | 0.09783 |
| rs566848    | 11 | 118711830 | G | A | 2.325  | 0.02009 | ++++  | 0     | 0.972 | 4 | 0.914   |
| rs79000353  | 11 | 118420343 | A | G | -2.325 | 0.02009 | ---?  | 7.7   | 5.417 | 3 | 0.1437  |
| rs498872    | 11 | 118477367 | A | G | -2.321 | 0.02031 | ----  | 0     | 2.553 | 4 | 0.6351  |
| rs11603313  | 11 | 72588177  | A | G | 2.32   | 0.02035 | ++++  | 21.8  | 7.67  | 4 | 0.1044  |
| rs7127427   | 11 | 118805138 | A | G | -2.319 | 0.02041 | -?--- | 0     | 0.694 | 3 | 0.8745  |
| rs73016221  | 11 | 118220027 | C | T | -2.318 | 0.02046 | -?-?  | -21.1 | 3.302 | 2 | 0.1918  |
| rs7930148   | 11 | 118435966 | A | G | 2.316  | 0.02058 | ++++? | 0     | 0.635 | 3 | 0.8883  |
| rs113573893 | 11 | 72078446  | G | T | 2.31   | 0.02086 | +++?  | -62.8 | 3.071 | 3 | 0.3808  |
| rs60712691  | 11 | 72077961  | T | G | 2.31   | 0.02086 | +++?  | -62.8 | 3.071 | 3 | 0.3808  |
| rs4944796   | 11 | 72499000  | C | A | -2.31  | 0.0209  | ----  | 0     | 0.317 | 4 | 0.9887  |
| rs570424    | 11 | 118588998 | C | T | 2.309  | 0.02094 | +++?  | 12.5  | 5.716 | 3 | 0.1263  |
| rs638893    | 11 | 118698537 | G | A | 2.305  | 0.02116 | ++++  | 1.3   | 6.08  | 4 | 0.1933  |
| rs3887652   | 11 | 118856582 | C | G | -2.301 | 0.02142 | -?--- | 0     | 1.176 | 3 | 0.7587  |
| rs639885    | 11 | 118698294 | A | G | 2.3    | 0.02146 | ++++  | 1.8   | 6.112 | 4 | 0.191   |
| rs640373    | 11 | 118698160 | G | A | 2.3    | 0.02147 | ++++  | 1.9   | 6.119 | 4 | 0.1904  |
| rs11603349  | 11 | 72460694  | C | T | 2.296  | 0.02166 | ++++  | 25.7  | 8.071 | 4 | 0.08901 |
| rs587263    | 11 | 118816156 | C | T | 2.296  | 0.02167 | +++?  | 0     | 2.864 | 3 | 0.4131  |
| rs10128600  | 11 | 118700425 | C | T | 2.296  | 0.0217  | +?++  | 18.7  | 6.147 | 3 | 0.1047  |
| rs639915    | 11 | 118698274 | A | G | 2.293  | 0.02182 | ++++  | 2.5   | 6.151 | 4 | 0.1881  |
| rs4938610   | 11 | 118857466 | C | T | -2.293 | 0.02183 | -?-?  | 0     | 1.203 | 2 | 0.548   |
| rs3889526   | 11 | 118856491 | A | C | -2.293 | 0.02184 | -?-?  | 0     | 1.179 | 2 | 0.5545  |
| rs2510901   | 11 | 118699863 | A | G | 2.292  | 0.02188 | ++++  | 4.8   | 6.302 | 4 | 0.1777  |
| rs75210328  | 11 | 118801296 | T | G | -2.285 | 0.02233 | -?--- | 0     | 0.706 | 3 | 0.8718  |
| rs4938614   | 11 | 118863232 | A | G | -2.284 | 0.02237 | -?-?  | 0     | 1.189 | 2 | 0.5518  |
| rs516332    | 11 | 118698777 | G | A | 2.282  | 0.02249 | ++++  | 3.3   | 6.203 | 4 | 0.1845  |
| rs2276424   | 11 | 118209960 | A | C | 2.278  | 0.02274 | +?+-  | -14.3 | 4.374 | 3 | 0.2238  |
| rs11217117  | 11 | 118865992 | T | C | -2.275 | 0.02288 | -?-?  | 0     | 1.235 | 2 | 0.5393  |

|            |    |           |   |   |        |         |       |       |        |   |         |
|------------|----|-----------|---|---|--------|---------|-------|-------|--------|---|---------|
| rs77464186 | 11 | 72460398  | C | A | 2.274  | 0.02295 | ++++  | 21.5  | 7.645  | 4 | 0.1055  |
| rs7944225  | 11 | 72496672  | C | G | -2.274 | 0.02297 | +--+  | 25.6  | 8.069  | 4 | 0.08907 |
| rs2508564  | 11 | 118699744 | C | T | 2.268  | 0.02335 | +++   | 3.5   | 6.219  | 4 | 0.1834  |
| rs10431173 | 11 | 72512937  | G | A | -2.268 | 0.02336 | +--+  | 21.6  | 7.649  | 4 | 0.1053  |
| rs569770   | 11 | 118584498 | T | C | 2.266  | 0.02347 | ++++  | 0     | 2.062  | 4 | 0.7243  |
| rs10892246 | 11 | 118481431 | A | G | -2.263 | 0.02361 | ----  | -7.3  | 5.589  | 4 | 0.232   |
| rs10160454 | 11 | 72496345  | C | A | -2.261 | 0.02377 | +--+  | 25.6  | 8.066  | 4 | 0.08919 |
| rs3212262  | 11 | 118217854 | T | G | -2.261 | 0.02378 | -?-?  | -22.1 | 3.276  | 2 | 0.1944  |
| rs10898873 | 11 | 72497713  | C | T | -2.259 | 0.02387 | +--+  | 25.1  | 8.015  | 4 | 0.09103 |
| rs57300701 | 11 | 118845546 | G | C | 2.257  | 0.024   | +?+   | -36.4 | 3.665  | 3 | 0.3     |
| rs7947423  | 11 | 72497001  | A | G | -2.256 | 0.02406 | +--+  | 25    | 8.003  | 4 | 0.09148 |
| rs10736492 | 11 | 118459269 | G | A | 2.256  | 0.02407 | ++++? | 0     | 0.518  | 3 | 0.9149  |
| rs11602873 | 11 | 72460762  | T | A | 2.256  | 0.02407 | ++++  | 21    | 7.596  | 4 | 0.1076  |
| rs7110034  | 11 | 118858911 | A | C | -2.255 | 0.02415 | -?-?  | 0     | 1.34   | 2 | 0.5117  |
| rs4938612  | 11 | 118863037 | C | T | -2.253 | 0.02429 | -?-?  | 0     | 1.154  | 2 | 0.5617  |
| rs12280288 | 11 | 118892940 | C | T | -2.252 | 0.02435 | -?--- | 0     | 0.608  | 3 | 0.8946  |
| rs11216843 | 11 | 118151329 | T | A | -2.251 | 0.02441 | +?-   | 32.9  | 7.455  | 3 | 0.05872 |
| rs10898874 | 11 | 72497795  | G | A | -2.247 | 0.02463 | +--+  | 25.5  | 8.054  | 4 | 0.08964 |
| rs6589659  | 11 | 118191691 | A | C | 2.246  | 0.02472 | +?+-  | -21.1 | 4.13   | 3 | 0.2478  |
| rs10898875 | 11 | 72497807  | C | T | -2.242 | 0.02494 | +--+  | 25.2  | 8.023  | 4 | 0.09073 |
| rs77293887 | 11 | 72118937  | T | C | 2.242  | 0.02499 | +++?  | 0     | 2.226  | 3 | 0.5269  |
| rs7121919  | 11 | 72496087  | A | G | -2.236 | 0.02537 | +--+  | 24.3  | 7.93   | 4 | 0.09419 |
| rs2231449  | 11 | 118186305 | A | C | -2.227 | 0.02594 | +?-   | 38.2  | 8.092  | 3 | 0.04414 |
| rs479490   | 11 | 72497321  | C | T | -2.226 | 0.02604 | +--+  | 25.8  | 8.085  | 4 | 0.0885  |
| rs4290240  | 11 | 118853488 | G | A | -2.225 | 0.02606 | -?-?  | 0     | 1.374  | 2 | 0.5032  |
| rs4938558  | 11 | 118717929 | T | C | 2.225  | 0.02609 | ++++  | 0     | 1.076  | 4 | 0.8981  |
| rs480958   | 11 | 118577990 | G | A | 2.223  | 0.02624 | ++++  | 0     | 2.633  | 4 | 0.621   |
| rs4938566  | 11 | 118721189 | T | A | 2.219  | 0.0265  | ++++  | 0     | 1.021  | 4 | 0.9065  |
| rs12418637 | 11 | 72061218  | A | G | 2.214  | 0.02682 | ++++  | -1.3  | 5.922  | 4 | 0.2051  |
| rs2276419  | 11 | 118230359 | T | C | -2.212 | 0.02698 | -?-?  | -25.6 | 3.186  | 2 | 0.2033  |
| rs34782343 | 11 | 118153511 | G | T | 2.211  | 0.02702 | +?+-  | 48.5  | 9.714  | 3 | 0.02116 |
| rs4938567  | 11 | 118721249 | G | A | 2.211  | 0.02705 | ++++  | 0     | 1.052  | 4 | 0.9017  |
| rs57156480 | 11 | 118896959 | A | G | -2.209 | 0.0272  | ----  | 0     | 0.824  | 4 | 0.9353  |
| rs10898895 | 11 | 72741398  | A | T | 2.208  | 0.02727 | +++   | 16.9  | 7.221  | 4 | 0.1246  |
| rs4938570  | 11 | 118722231 | G | A | 2.207  | 0.02734 | ++++  | 0     | 1.047  | 4 | 0.9026  |
| rs7110837  | 11 | 118199295 | A | G | 2.206  | 0.02741 | +?+-  | -20   | 4.167  | 3 | 0.244   |
| rs11216855 | 11 | 118208750 | C | T | -2.205 | 0.02746 | -?--- | 0     | 1.656  | 3 | 0.6469  |
| rs4938565  | 11 | 118720998 | A | G | 2.204  | 0.02751 | ++++  | 0     | 1.012  | 4 | 0.9079  |
| rs904469   | 11 | 72324039  | A | G | 2.203  | 0.02757 | -?+++ | 0     | 2.336  | 3 | 0.5057  |
| rs11216853 | 11 | 118200201 | T | A | 2.202  | 0.02763 | +?+-  | -21.2 | 4.125  | 3 | 0.2483  |
| rs11217059 | 11 | 118723087 | T | C | 2.201  | 0.02774 | ++++  | 0     | 1.058  | 4 | 0.9009  |
| rs61036532 | 11 | 72017321  | G | A | 2.2    | 0.02783 | ++++  | 5.6   | 6.355  | 4 | 0.1741  |
| rs4445645  | 11 | 118868750 | C | G | -2.199 | 0.02784 | -?--- | 0     | 1.891  | 3 | 0.5954  |
| rs4936440  | 11 | 118720684 | G | C | 2.196  | 0.02812 | ++++  | 0     | 1.025  | 4 | 0.906   |
| rs12223292 | 11 | 72487259  | A | G | -2.195 | 0.02816 | +--+  | 49.3  | 11.836 | 4 | 0.01861 |
| rs7946961  | 11 | 118721850 | G | A | 2.195  | 0.02819 | ++++  | 0     | 1.094  | 4 | 0.8951  |
| rs4938606  | 11 | 118852081 | G | A | -2.192 | 0.02834 | -?-?  | 0     | 1.248  | 2 | 0.5358  |
| rs12421674 | 11 | 72056591  | T | C | 2.19   | 0.02853 | ++++  | 10.3  | 6.689  | 4 | 0.1532  |
| rs755933   | 11 | 72325482  | A | G | 2.188  | 0.02866 | -?+++ | 0     | 2.355  | 3 | 0.5021  |
| rs56076328 | 11 | 72023279  | A | G | 2.186  | 0.02881 | ++++  | 6.3   | 6.401  | 4 | 0.1711  |
| rs58945323 | 11 | 72042223  | C | T | 2.184  | 0.02899 | ++++  | 5.6   | 6.359  | 4 | 0.1739  |
| rs11216848 | 11 | 118181481 | A | C | -2.183 | 0.02903 | +?-   | 32.7  | 7.426  | 3 | 0.0595  |
| rs7933007  | 11 | 118730669 | C | T | 2.18   | 0.02928 | ++++  | 0     | 1.31   | 4 | 0.8596  |
| rs4938564  | 11 | 118720590 | T | G | 2.178  | 0.02943 | ++++  | 0     | 1.003  | 4 | 0.9093  |
| rs77106637 | 11 | 72478320  | A | G | 2.175  | 0.02966 | ++++  | -5.3  | 5.701  | 4 | 0.2226  |
| rs2187491  | 11 | 118718972 | C | T | 2.174  | 0.02967 | ++++  | 0     | 0.948  | 4 | 0.9176  |

|             |    |           |   |   |        |         |       |       |        |   |         |
|-------------|----|-----------|---|---|--------|---------|-------|-------|--------|---|---------|
| rs2156751   | 11 | 118718856 | G | A | 2.17   | 0.03003 | +++++ | 0     | 0.966  | 4 | 0.9149  |
| rs3781934   | 11 | 72325070  | A | G | 2.166  | 0.03031 | -?+++ | 0     | 2.351  | 3 | 0.5028  |
| rs11217122  | 11 | 118880740 | C | T | -2.165 | 0.03038 | -?--- | 0     | 0.805  | 3 | 0.8484  |
| rs3750906   | 11 | 72012682  | G | A | 2.164  | 0.03048 | ++++- | 8.2   | 6.533  | 4 | 0.1627  |
| rs2156749   | 11 | 118719405 | G | C | 2.163  | 0.03055 | +++++ | 0     | 0.968  | 4 | 0.9146  |
| rs9794909   | 11 | 118862306 | C | G | -2.161 | 0.03067 | ---?- | 0     | 1.605  | 3 | 0.6582  |
| rs17162126  | 11 | 72057178  | T | A | 2.161  | 0.03068 | ++++- | 8.2   | 6.537  | 4 | 0.1625  |
| rs73005500  | 11 | 118697375 | C | T | 2.158  | 0.03091 | +?-++ | 24.7  | 6.642  | 3 | 0.08422 |
| rs2156750   | 11 | 118719254 | C | T | 2.157  | 0.03101 | +++++ | 0     | 0.991  | 4 | 0.9112  |
| rs73530724  | 11 | 72049158  | G | A | 2.15   | 0.03158 | ++++- | 5.1   | 6.323  | 4 | 0.1763  |
| rs7116715   | 11 | 118719742 | C | T | 2.149  | 0.03165 | +++++ | 0     | 0.981  | 4 | 0.9126  |
| rs56171963  | 11 | 72009455  | G | A | 2.147  | 0.03178 | ++++- | 7.6   | 6.495  | 4 | 0.1651  |
| rs57879605  | 11 | 118798757 | T | C | -2.147 | 0.0318  | ----+ | -13.8 | 5.274  | 4 | 0.2604  |
| rs12416804  | 11 | 72048526  | G | T | 2.146  | 0.03189 | ++++- | 4.4   | 6.277  | 4 | 0.1794  |
| rs7103314   | 11 | 118723537 | G | A | 2.139  | 0.03242 | +++++ | 0     | 0.991  | 4 | 0.9111  |
| rs58044536  | 11 | 72011227  | G | A | 2.138  | 0.03254 | ++++- | 5.5   | 6.349  | 4 | 0.1745  |
| rs3889234   | 11 | 72490986  | C | T | -2.137 | 0.03257 | +--+  | 51.5  | 12.383 | 4 | 0.01472 |
| rs73530718  | 11 | 72045813  | C | T | 2.135  | 0.03275 | ++++- | 4.4   | 6.278  | 4 | 0.1793  |
| rs11217062  | 11 | 118725420 | A | G | 2.134  | 0.03284 | +++++ | 0     | 1.117  | 4 | 0.8916  |
| rs504217    | 11 | 72006086  | T | C | 2.132  | 0.03299 | ++++- | -4.2  | 5.758  | 4 | 0.2179  |
| rs11217118  | 11 | 118866072 | A | G | -2.131 | 0.03311 | ---?- | 0     | 1.761  | 3 | 0.6235  |
| rs7928228   | 11 | 118703001 | T | C | 2.127  | 0.03344 | +++-- | -13.6 | 5.283  | 4 | 0.2595  |
| rs4936454   | 11 | 118859274 | T | C | -2.127 | 0.03345 | ---?- | 0     | 1.732  | 3 | 0.6298  |
| rs11217112  | 11 | 118856920 | G | A | -2.124 | 0.03364 | ---?- | 0     | 1.711  | 3 | 0.6345  |
| rs11217116  | 11 | 118864140 | C | T | -2.124 | 0.03367 | ---?- | 0     | 1.693  | 3 | 0.6385  |
| rs1170396   | 11 | 118703817 | T | A | 2.122  | 0.0338  | +++-- | -13.1 | 5.306  | 4 | 0.2573  |
| rs11216846  | 11 | 118163916 | A | G | -2.121 | 0.0339  | -+?-  | 31.6  | 7.31   | 3 | 0.06265 |
| rs77058558  | 11 | 72065102  | A | G | 2.121  | 0.03392 | ++++- | -19.5 | 5.023  | 4 | 0.285   |
| rs73528886  | 11 | 72013848  | A | G | 2.121  | 0.03393 | ++++- | -20.3 | 4.987  | 4 | 0.2886  |
| rs7941696   | 11 | 118702936 | G | A | 2.121  | 0.03394 | +++-- | -13.3 | 5.295  | 4 | 0.2583  |
| rs680660    | 11 | 72004714  | C | T | 2.12   | 0.034   | ++++- | -4.1  | 5.766  | 4 | 0.2173  |
| rs75067211  | 11 | 118854372 | T | C | -2.12  | 0.03401 | -?--- | 0     | 0.864  | 3 | 0.834   |
| rs2508921   | 11 | 118703484 | T | C | 2.119  | 0.03413 | +++-- | -12.6 | 5.327  | 4 | 0.2553  |
| rs59626457  | 11 | 118862634 | G | A | -2.118 | 0.0342  | ---?- | 0     | 1.684  | 3 | 0.6406  |
| rs10892298  | 11 | 118724336 | C | T | 2.114  | 0.03451 | +++++ | 0     | 0.957  | 4 | 0.9162  |
| rs534114    | 11 | 118702002 | A | G | 2.113  | 0.03462 | +++-- | -16   | 5.17   | 4 | 0.2702  |
| rs4936455   | 11 | 118861389 | T | C | -2.112 | 0.03467 | ---?- | 0     | 1.771  | 3 | 0.6213  |
| rs59316586  | 11 | 118856816 | C | A | -2.112 | 0.03467 | ---?- | 0     | 1.769  | 3 | 0.6217  |
| rs622690    | 11 | 118704265 | T | C | 2.109  | 0.03495 | +++-- | -11.9 | 5.36   | 4 | 0.2523  |
| rs474629    | 11 | 72006977  | C | G | 2.108  | 0.03501 | ++++- | -4.1  | 5.762  | 4 | 0.2176  |
| rs7941321   | 11 | 118702910 | A | G | 2.107  | 0.03515 | +++-- | -19.9 | 5.003  | 4 | 0.287   |
| rs7126193   | 11 | 118866126 | C | T | -2.106 | 0.03519 | ---?- | 0     | 1.779  | 3 | 0.6196  |
| rs3781931   | 11 | 72327205  | T | C | 2.105  | 0.03528 | -?+++ | 0     | 2.196  | 3 | 0.5327  |
| rs4938613   | 11 | 118863116 | G | A | -2.104 | 0.03542 | ---?- | 0     | 1.638  | 3 | 0.6507  |
| rs12362865  | 11 | 118859842 | G | A | -2.103 | 0.03549 | ---?- | 0     | 1.696  | 3 | 0.6377  |
| rs2156755   | 11 | 118726230 | A | G | 2.102  | 0.03553 | +++++ | 0     | 1.036  | 4 | 0.9043  |
| rs4938561   | 11 | 118718485 | C | T | 2.102  | 0.03554 | +++++ | 0     | 0.977  | 4 | 0.9132  |
| rs480791    | 11 | 118704255 | G | A | 2.102  | 0.03556 | +++-- | -11.9 | 5.362  | 4 | 0.2521  |
| rs4936456   | 11 | 118863324 | T | C | -2.1   | 0.03571 | ---?- | 0     | 1.646  | 3 | 0.6491  |
| rs55721826  | 11 | 72019162  | G | A | 2.1    | 0.03575 | ++++- | 8     | 6.523  | 4 | 0.1634  |
| rs3194726   | 11 | 118279936 | C | T | -2.097 | 0.03597 | -?-?- | 0     | 1.595  | 2 | 0.4505  |
| rs7940062   | 11 | 72037226  | C | A | 2.091  | 0.03652 | ++++- | -0.2  | 5.991  | 4 | 0.1998  |
| rs533254    | 11 | 118701898 | A | T | 2.087  | 0.03688 | +?-++ | 4.5   | 5.235  | 3 | 0.1554  |
| rs4938549   | 11 | 118701597 | T | C | 2.085  | 0.03703 | +++-- | -12.9 | 5.314  | 4 | 0.2565  |
| rs530646    | 11 | 118701668 | A | G | 2.084  | 0.03714 | +++-- | -12.8 | 5.321  | 4 | 0.2559  |
| rs140026975 | 11 | 118594669 | C | A | 2.077  | 0.03776 | +++?- | 26.1  | 6.767  | 3 | 0.07972 |

|             |    |           |   |   |        |         |       |       |       |   |         |
|-------------|----|-----------|---|---|--------|---------|-------|-------|-------|---|---------|
| rs4938616   | 11 | 118865465 | T | C | -2.069 | 0.03852 | -?-?- | 0     | 1.283 | 2 | 0.5264  |
| rs17540708  | 11 | 118150127 | G | T | 2.065  | 0.03888 | +?+-  | 39.1  | 8.208 | 3 | 0.04191 |
| rs7131196   | 11 | 118265227 | C | T | -2.065 | 0.0389  | -?-?- | 0     | 1.467 | 2 | 0.4803  |
| rs58709307  | 11 | 118877563 | T | C | -2.053 | 0.04011 | -?--- | 0     | 1.33  | 3 | 0.722   |
| rs75017819  | 11 | 118285789 | G | A | -2.051 | 0.04031 | -?-?- | 0     | 1.42  | 2 | 0.4916  |
| rs74783030  | 11 | 118603615 | A | G | -2.05  | 0.04035 | --++? | 23.2  | 6.511 | 3 | 0.08925 |
| rs4936428   | 11 | 118187511 | T | C | 2.041  | 0.04127 | +?+-  | 16.7  | 6.004 | 3 | 0.1114  |
| rs79092677  | 11 | 118265734 | G | T | -2.038 | 0.04156 | -?-?- | 0     | 1.49  | 2 | 0.4748  |
| rs59755180  | 11 | 72073763  | C | G | 2.037  | 0.04165 | +++?+ | -22.3 | 4.088 | 3 | 0.2522  |
| rs4944563   | 11 | 72316881  | C | A | 2.037  | 0.04166 | -?+++ | 0     | 2.542 | 3 | 0.4677  |
| rs649338    | 11 | 118705654 | A | G | 2.036  | 0.04175 | +++-- | -8.4  | 5.533 | 4 | 0.2368  |
| rs55861597  | 11 | 72331873  | T | G | 2.036  | 0.04178 | -?+++ | 0     | 2.532 | 3 | 0.4695  |
| rs55738331  | 11 | 72331821  | T | C | 2.034  | 0.04194 | -?+++ | 0     | 2.529 | 3 | 0.47    |
| rs7484280   | 11 | 72167386  | A | C | 2.033  | 0.04204 | +++?- | -23.8 | 4.038 | 3 | 0.2574  |
| rs73532667  | 11 | 72162726  | C | T | 2.033  | 0.04205 | +++?- | -40.9 | 3.549 | 3 | 0.3145  |
| rs55756957  | 11 | 118747576 | G | A | -2.031 | 0.04225 | -?--+ | 41.1  | 8.495 | 3 | 0.03682 |
| rs10892237  | 11 | 118267763 | C | T | -2.029 | 0.0425  | -?-?- | 0     | 1.514 | 2 | 0.469   |
| rs12294037  | 11 | 72807631  | T | A | -2.029 | 0.04251 | ---+- | -24.9 | 4.805 | 4 | 0.3079  |
| rs11216864  | 11 | 118260017 | T | C | -2.024 | 0.043   | -?-?- | 0     | 1.369 | 2 | 0.5044  |
| rs11216863  | 11 | 118257081 | A | G | -2.02  | 0.04333 | -?-?- | 0     | 1.161 | 2 | 0.5596  |
| rs2276422   | 11 | 118263388 | G | C | -2.017 | 0.04368 | -?-?- | 0     | 1.554 | 2 | 0.4597  |
| rs6592510   | 11 | 72788823  | C | T | -2.013 | 0.04416 | ---+- | -26.1 | 4.76  | 4 | 0.3129  |
| rs74766959  | 11 | 72065209  | G | A | 2.013  | 0.04416 | +++?- | -4.3  | 4.793 | 3 | 0.1876  |
| rs61730467  | 11 | 118772160 | A | G | -2.008 | 0.04465 | -?--? | 0     | 0.651 | 2 | 0.7221  |
| rs59776769  | 11 | 72296353  | A | G | 2.003  | 0.04515 | -?+++ | 0     | 1.647 | 3 | 0.6489  |
| rs56148078  | 11 | 72529358  | A | C | -2.002 | 0.04529 | ---++ | 52.5  | 12.63 | 4 | 0.01323 |
| rs11606357  | 11 | 118878222 | C | T | -2.002 | 0.04534 | -?--- | 0     | 1.292 | 3 | 0.731   |
| rs111322300 | 11 | 118893878 | C | T | -1.999 | 0.04559 | ----  | 0     | 2.196 | 4 | 0.6997  |
| rs56210510  | 11 | 72333342  | C | T | 1.996  | 0.04592 | -?+++ | 0     | 2.692 | 3 | 0.4416  |
| rs1783584   | 11 | 72889137  | C | T | -1.993 | 0.04623 | ----  | 0     | 1.036 | 4 | 0.9043  |
| rs4394861   | 11 | 72800970  | C | T | -1.993 | 0.04624 | +---- | 0     | 3.885 | 4 | 0.4218  |
| rs3176912   | 11 | 118757788 | A | G | -1.988 | 0.04676 | -?--? | 0     | 1.374 | 2 | 0.503   |
| rs4944566   | 11 | 72321872  | A | G | 1.981  | 0.04755 | -?+++ | 0     | 2.343 | 3 | 0.5043  |
| rs11607569  | 11 | 118880668 | C | T | -1.969 | 0.04895 | -?--- | 0     | 1.479 | 3 | 0.6871  |
| rs34022886  | 11 | 118155804 | A | G | 1.969  | 0.049   | +?+-  | 38    | 8.066 | 3 | 0.04467 |
| rs113641235 | 11 | 118700264 | T | C | 1.968  | 0.04906 | ---++ | 23.6  | 7.85  | 4 | 0.09724 |
| rs10111     | 11 | 118886117 | T | C | -1.967 | 0.04924 | -?--- | 0     | 1.158 | 3 | 0.7631  |
| rs68097885  | 11 | 118596444 | A | G | 1.966  | 0.04926 | ++++- | 20.4  | 7.534 | 4 | 0.1102  |
| rs4515995   | 11 | 72687795  | G | A | -1.963 | 0.04965 | ----+ | -13.1 | 5.304 | 4 | 0.2575  |
| rs10898881  | 11 | 72527018  | A | G | 1.958  | 0.05022 | ++++- | 0     | 2.16  | 4 | 0.7063  |
| rs636736    | 11 | 118705145 | G | A | 1.958  | 0.05027 | +++-- | -16.3 | 5.159 | 4 | 0.2714  |
| rs12798115  | 11 | 118156517 | C | G | 1.957  | 0.05034 | +?+-  | 37.9  | 8.057 | 3 | 0.04484 |
| rs35235858  | 11 | 118157250 | T | C | 1.954  | 0.05067 | +?+-  | 38.3  | 8.1   | 3 | 0.04398 |
| rs1783937   | 11 | 118609736 | A | G | 1.949  | 0.05124 | +?+-  | -14.1 | 4.383 | 3 | 0.223   |
| rs34250455  | 11 | 118157681 | T | C | 1.948  | 0.0514  | +?+-  | 38.7  | 8.156 | 3 | 0.0429  |
| rs1513780   | 11 | 72320500  | T | G | 1.942  | 0.0521  | -?+++ | 0     | 2.367 | 3 | 0.4999  |
| rs7943039   | 11 | 118603030 | A | G | 1.938  | 0.05259 | ++++- | 23.5  | 7.84  | 4 | 0.09763 |
| rs12274926  | 11 | 118295117 | C | T | 1.937  | 0.05278 | +++++ | 0     | 0.802 | 4 | 0.9381  |
| rs143660533 | 11 | 118892759 | C | A | -1.936 | 0.05282 | ----  | 0     | 2.144 | 4 | 0.7093  |
| rs11825284  | 11 | 118880012 | A | G | -1.935 | 0.05304 | -?--- | 0     | 1.695 | 3 | 0.638   |
| rs117289748 | 11 | 118892757 | G | C | -1.934 | 0.05308 | ----  | 0     | 2.142 | 4 | 0.7097  |
| rs484232    | 11 | 118708564 | T | G | 1.929  | 0.05371 | +++++ | 0     | 1.896 | 4 | 0.7548  |
| rs7131534   | 11 | 118886656 | A | G | -1.925 | 0.05426 | -?--- | 0     | 1.748 | 3 | 0.6264  |
| rs7479373   | 11 | 118171285 | C | T | 1.924  | 0.05431 | +?+-  | 37.2  | 7.965 | 3 | 0.04673 |
| rs73559119  | 11 | 118879824 | C | T | -1.924 | 0.05438 | -?--- | 0     | 1.664 | 3 | 0.6449  |
| rs7120445   | 11 | 118879285 | C | A | -1.923 | 0.05445 | -?--- | 0     | 1.656 | 3 | 0.6467  |

|             |    |           |   |   |        |         |       |       |       |   |         |
|-------------|----|-----------|---|---|--------|---------|-------|-------|-------|---|---------|
| rs6589664   | 11 | 118404804 | A | G | 1.922  | 0.05457 | ++++? | 0     | 1.223 | 3 | 0.7475  |
| rs11825496  | 11 | 118855221 | G | T | -1.919 | 0.055   | ---?- | 0     | 1.303 | 3 | 0.7283  |
| rs4456264   | 11 | 118851138 | T | C | -1.918 | 0.05511 | ---?- | 0     | 1.348 | 3 | 0.7178  |
| rs4936451   | 11 | 118852137 | T | C | -1.916 | 0.05541 | ---?- | 0     | 1.334 | 3 | 0.721   |
| rs45527340  | 11 | 118852526 | G | C | -1.913 | 0.05578 | ---?- | 0     | 1.343 | 3 | 0.719   |
| rs11006     | 11 | 118895202 | G | A | -1.909 | 0.0562  | ----- | 0     | 1.684 | 4 | 0.7936  |
| rs11216982  | 11 | 118590864 | A | G | 1.909  | 0.05622 | +++?- | 34.4  | 7.623 | 3 | 0.05447 |
| rs1790191   | 11 | 118825636 | A | G | 1.908  | 0.05635 | +?+++ | 0     | 0.497 | 3 | 0.9196  |
| rs61179449  | 11 | 118892835 | C | G | -1.902 | 0.05711 | ----- | 0     | 1.915 | 4 | 0.7513  |
| rs11822344  | 11 | 118864777 | C | G | -1.9   | 0.05741 | ---?- | 0     | 1.475 | 3 | 0.688   |
| rs3862794   | 11 | 72538600  | C | T | -1.899 | 0.05752 | +--+  | -2.7  | 5.843 | 4 | 0.2112  |
| rs7122959   | 11 | 118804283 | G | A | -1.899 | 0.05752 | +---  | 0     | 2.825 | 4 | 0.5876  |
| rs58955701  | 11 | 118892872 | T | C | -1.899 | 0.05757 | ----- | 0     | 1.915 | 4 | 0.7513  |
| rs503542    | 11 | 118590743 | G | A | 1.899  | 0.05761 | ++-?+ | -36.8 | 3.656 | 3 | 0.3011  |
| rs2231440   | 11 | 118175439 | A | G | 1.898  | 0.05765 | +?+-  | 37.2  | 7.965 | 3 | 0.04675 |
| rs7127188   | 11 | 118893023 | C | A | -1.893 | 0.05831 | ----- | 0     | 1.949 | 4 | 0.7451  |
| rs4938551   | 11 | 118707249 | C | G | 1.893  | 0.05833 | +++++ | 0     | 1.729 | 4 | 0.7855  |
| rs4938621   | 11 | 118892277 | T | C | -1.893 | 0.05838 | ----- | 0     | 1.9   | 4 | 0.7542  |
| rs12273687  | 11 | 118852641 | T | G | -1.892 | 0.05852 | ---?- | 0     | 1.681 | 3 | 0.6412  |
| rs4938605   | 11 | 118850707 | A | G | -1.891 | 0.05858 | ---?- | 0     | 1.393 | 3 | 0.7073  |
| rs7123066   | 11 | 118804266 | T | C | -1.889 | 0.05888 | +---  | 0     | 2.773 | 4 | 0.5964  |
| rs7925155   | 11 | 72732430  | C | G | -1.88  | 0.06015 | +--+  | -23.5 | 4.857 | 4 | 0.3023  |
| rs2231441   | 11 | 118175540 | G | A | 1.878  | 0.06044 | +?+-  | 38    | 8.069 | 3 | 0.04461 |
| rs3759009   | 11 | 118173850 | A | G | 1.874  | 0.06094 | +?+-  | 39.6  | 8.272 | 3 | 0.04071 |
| rs79108568  | 11 | 118775524 | G | T | -1.872 | 0.06115 | -?--? | 0     | 0.54  | 2 | 0.7632  |
| rs73530756  | 11 | 72101747  | T | A | 1.861  | 0.06276 | +++?- | 0     | 2.623 | 3 | 0.4534  |
| rs515707    | 11 | 118685481 | T | C | 1.859  | 0.06303 | +?-?+ | 37.7  | 6.418 | 2 | 0.0404  |
| rs73530754  | 11 | 72099007  | T | C | 1.856  | 0.06352 | +++?- | 0     | 2.71  | 3 | 0.4384  |
| rs521910    | 11 | 118610629 | A | G | 1.855  | 0.06356 | +?-++ | -4    | 4.807 | 3 | 0.1865  |
| rs4456287   | 11 | 118298252 | C | T | 1.855  | 0.06363 | +++++ | 0     | 0.982 | 4 | 0.9125  |
| rs4499035   | 11 | 118610463 | T | C | 1.854  | 0.06372 | ++++- | 24.6  | 7.959 | 4 | 0.0931  |
| rs60065241  | 11 | 118883491 | A | C | -1.852 | 0.06406 | -?--- | 0     | 1.46  | 3 | 0.6916  |
| rs10892234  | 11 | 118194571 | G | A | -1.851 | 0.06411 | ----- | 0     | 2.278 | 4 | 0.6847  |
| rs536256    | 11 | 118327321 | G | A | 1.847  | 0.06475 | +++++ | 0     | 0.336 | 4 | 0.9874  |
| rs526850    | 11 | 118605127 | G | T | 1.84   | 0.06579 | +?-++ | -21.1 | 4.13  | 3 | 0.2477  |
| rs45573242  | 11 | 118853995 | C | A | 1.837  | 0.06615 | +--+? | 0     | 2.695 | 3 | 0.441   |
| rs55930012  | 11 | 72079380  | C | T | 1.833  | 0.06683 | +++?- | 30.2  | 7.162 | 3 | 0.0669  |
| rs1893029   | 11 | 118610826 | T | G | 1.82   | 0.06878 | ++++- | 22.8  | 7.772 | 4 | 0.1003  |
| rs754042    | 11 | 72326275  | T | C | 1.813  | 0.06983 | --+++ | 0     | 3.474 | 4 | 0.4819  |
| rs61901410  | 11 | 118661197 | G | C | 1.812  | 0.06994 | +?-++ | 32.6  | 7.422 | 3 | 0.0596  |
| rs59255055  | 11 | 118296735 | A | C | 1.811  | 0.07014 | +++++ | 0     | 0.736 | 4 | 0.9468  |
| rs58577143  | 11 | 118291210 | G | A | 1.807  | 0.07075 | +++++ | 0     | 2.242 | 4 | 0.6914  |
| rs78488993  | 11 | 72882539  | C | G | 1.806  | 0.07088 | +++?  | 0     | 2.923 | 3 | 0.4036  |
| rs493720    | 11 | 118604678 | T | C | 1.804  | 0.0712  | +?-++ | -16.2 | 4.305 | 3 | 0.2304  |
| rs2298821   | 11 | 118185140 | C | T | 1.799  | 0.07206 | +?+-  | 44.9  | 9.068 | 3 | 0.0284  |
| rs73001486  | 11 | 118629364 | A | G | 1.798  | 0.0721  | ++++- | 20.8  | 7.575 | 4 | 0.1084  |
| rs138922408 | 11 | 118356711 | T | C | -1.797 | 0.07231 | ---+? | 15.1  | 5.888 | 3 | 0.1172  |
| rs2186781   | 11 | 118605447 | T | C | 1.796  | 0.07254 | +?-++ | -10.8 | 4.514 | 3 | 0.211   |
| rs3825057   | 11 | 118622985 | C | T | 1.792  | 0.07311 | ++++- | 26.1  | 8.123 | 4 | 0.08718 |
| rs10501410  | 11 | 72088806  | A | G | 1.788  | 0.07373 | +++?- | 0     | 1.898 | 3 | 0.5939  |
| rs498684    | 11 | 118316960 | A | G | 1.784  | 0.07449 | +++++ | 0     | 0.482 | 4 | 0.9753  |
| rs523148    | 11 | 118682462 | T | C | 1.783  | 0.07454 | +?-?+ | 35.5  | 6.204 | 2 | 0.04495 |
| rs3819250   | 11 | 118185346 | A | G | 1.779  | 0.07519 | +?+-  | 44.9  | 9.077 | 3 | 0.02828 |
| rs10898893  | 11 | 72676699  | C | T | -1.779 | 0.07523 | --+-  | 9.7   | 6.646 | 4 | 0.1558  |
| rs61900905  | 11 | 118185492 | C | T | 1.777  | 0.07558 | +?+-  | 45.9  | 9.239 | 3 | 0.02628 |
| rs569       | 11 | 118894287 | G | A | -1.775 | 0.07587 | ----- | 0     | 1.502 | 4 | 0.8263  |

|             |    |           |   |   |        |         |       |       |       |   |         |
|-------------|----|-----------|---|---|--------|---------|-------|-------|-------|---|---------|
| rs60081894  | 11 | 72108715  | C | A | 1.774  | 0.07603 | +++?- | 0     | 2.421 | 3 | 0.4897  |
| rs7130875   | 11 | 118613674 | C | T | 1.772  | 0.07646 | ++++- | 25.6  | 8.064 | 4 | 0.08928 |
| rs28423005  | 11 | 118183733 | T | C | 1.771  | 0.0765  | +?++- | 42.3  | 8.669 | 3 | 0.03404 |
| rs4938503   | 11 | 118180155 | C | G | 1.763  | 0.07782 | +?++- | 41.4  | 8.532 | 3 | 0.0362  |
| rs487177    | 11 | 118657297 | G | C | 1.762  | 0.07813 | ++++- | 21.4  | 7.631 | 4 | 0.1061  |
| rs1126924   | 11 | 118178007 | T | C | 1.76   | 0.07837 | +?++- | 40.6  | 8.416 | 3 | 0.03816 |
| rs11217076  | 11 | 118745664 | G | T | 1.76   | 0.0784  | +++-- | 0     | 1.817 | 4 | 0.7694  |
| rs2277289   | 11 | 118182660 | C | T | 1.76   | 0.0784  | +?++- | 41.4  | 8.525 | 3 | 0.03632 |
| rs4938550   | 11 | 118707171 | G | A | 1.76   | 0.07843 | +?--+ | 15    | 5.882 | 3 | 0.1175  |
| rs574387    | 11 | 118337003 | C | A | 1.757  | 0.07899 | +++++ | 0     | 0.649 | 4 | 0.9575  |
| rs7124498   | 11 | 118616253 | A | G | 1.755  | 0.07927 | ++++- | 24.4  | 7.934 | 4 | 0.09402 |
| rs11217016  | 11 | 118627149 | C | A | 1.754  | 0.07941 | ++++- | 20.4  | 7.542 | 4 | 0.1099  |
| rs61563240  | 11 | 72056185  | A | G | 1.751  | 0.07996 | +++?- | 23.3  | 6.516 | 3 | 0.08902 |
| rs112996178 | 11 | 118609598 | T | C | 1.747  | 0.08063 | ++++- | 22.3  | 7.726 | 4 | 0.1021  |
| rs7119702   | 11 | 118607694 | G | A | 1.743  | 0.08127 | +?--+ | -22.5 | 4.083 | 3 | 0.2527  |
| rs34147990  | 11 | 72160112  | T | C | 1.741  | 0.0817  | +++?- | -57.1 | 3.183 | 3 | 0.3642  |
| rs7952074   | 11 | 72062978  | G | A | 1.739  | 0.08211 | +++?- | 25.2  | 6.687 | 3 | 0.08258 |
| rs2851460   | 11 | 118716563 | A | G | 1.728  | 0.08397 | ----- | 0     | 2.179 | 4 | 0.7028  |
| rs6421568   | 11 | 118655704 | C | G | 1.725  | 0.08445 | +?--+ | -2.5  | 4.879 | 3 | 0.1809  |
| rs56229279  | 11 | 72013788  | G | A | 1.721  | 0.08529 | +++?- | 45.9  | 9.242 | 3 | 0.02624 |
| rs11217013  | 11 | 118624919 | C | G | 1.718  | 0.08582 | ++++- | 20.1  | 7.506 | 4 | 0.1115  |
| rs76068633  | 11 | 118416268 | T | C | -1.718 | 0.08589 | ----? | 25.8  | 6.739 | 3 | 0.0807  |
| rs58306819  | 11 | 72054966  | C | T | 1.714  | 0.0866  | +++?- | 25.7  | 6.728 | 3 | 0.08109 |
| rs6421569   | 11 | 118655775 | A | C | 1.713  | 0.08677 | +?--+ | -0.6  | 4.973 | 3 | 0.1738  |
| rs2508915   | 11 | 118652781 | C | G | 1.709  | 0.08751 | +?--+ | -0.5  | 4.975 | 3 | 0.1736  |
| rs10892282  | 11 | 118627778 | C | G | 1.707  | 0.08776 | ++++- | 19.1  | 7.412 | 4 | 0.1157  |
| rs56104144  | 11 | 118666289 | C | G | 1.707  | 0.08782 | ++++- | 25.1  | 8.011 | 4 | 0.09118 |
| rs7124336   | 11 | 72160271  | T | C | 1.707  | 0.08788 | +++?- | -49.5 | 3.344 | 3 | 0.3416  |
| rs141108621 | 11 | 118349211 | T | C | -1.704 | 0.08833 | ----? | -0.1  | 4.996 | 3 | 0.1721  |
| rs11823672  | 11 | 72160828  | G | A | 1.702  | 0.08878 | +++?- | -53   | 3.268 | 3 | 0.3522  |
| rs7926133   | 11 | 72647296  | C | T | -1.702 | 0.08881 | --+-+ | 9.1   | 6.601 | 4 | 0.1585  |
| rs11217014  | 11 | 118626286 | C | T | 1.699  | 0.08932 | ++++- | 21.2  | 7.614 | 4 | 0.1068  |
| rs7934890   | 11 | 118655356 | T | C | 1.693  | 0.09038 | ++++- | 20.8  | 7.574 | 4 | 0.1085  |
| rs57276029  | 11 | 72059859  | C | T | 1.693  | 0.0904  | +++?- | 25.7  | 6.727 | 3 | 0.08111 |
| rs112910608 | 11 | 118637475 | T | C | 1.693  | 0.09049 | ++++- | 18.9  | 7.397 | 4 | 0.1163  |
| rs6592500   | 11 | 72651705  | G | A | -1.692 | 0.09068 | +---- | -31.1 | 4.575 | 4 | 0.3337  |
| rs7110526   | 11 | 118633533 | C | T | 1.689  | 0.09115 | ++++- | 18.9  | 7.402 | 4 | 0.1161  |
| rs1784295   | 11 | 118660932 | A | G | 1.689  | 0.09122 | +?--+ | 0.1   | 5.004 | 3 | 0.1715  |
| rs535996    | 11 | 118637666 | T | C | 1.681  | 0.09281 | +?--+ | -8.1  | 4.626 | 3 | 0.2013  |
| rs529717    | 11 | 118640081 | A | G | 1.678  | 0.09334 | +?--+ | -8.7  | 4.598 | 3 | 0.2037  |
| rs1790188   | 11 | 118661055 | T | C | 1.677  | 0.09345 | +?--+ | 0.3   | 5.017 | 3 | 0.1705  |
| rs116976310 | 11 | 118420099 | C | A | -1.677 | 0.0935  | ----? | 14.4  | 5.841 | 3 | 0.1196  |
| rs187678279 | 11 | 118338067 | A | G | -1.676 | 0.09374 | ----? | 10.1  | 5.562 | 3 | 0.135   |
| rs57928845  | 11 | 72149909  | T | C | 1.676  | 0.09382 | +++?- | 0     | 2.756 | 3 | 0.4307  |
| rs548167    | 11 | 118648396 | A | G | 1.674  | 0.09414 | +?--+ | -5.2  | 4.751 | 3 | 0.1909  |
| rs11217021  | 11 | 118640828 | C | T | 1.674  | 0.09422 | ++++- | 18.8  | 7.393 | 4 | 0.1165  |
| rs602716    | 11 | 118801235 | A | G | 1.673  | 0.09439 | +--+- | 18.2  | 7.338 | 4 | 0.1191  |
| rs615166    | 11 | 118803536 | A | G | 1.671  | 0.09469 | +--+- | 16.2  | 7.159 | 4 | 0.1277  |
| rs2508929   | 11 | 118641451 | G | T | 1.67   | 0.09485 | +?--+ | -8.1  | 4.625 | 3 | 0.2014  |
| rs11217018  | 11 | 118635364 | C | T | 1.669  | 0.09521 | ++++- | 19    | 7.406 | 4 | 0.1159  |
| rs10736495  | 11 | 118607090 | C | G | 1.667  | 0.09547 | +?--+ | -16.4 | 4.297 | 3 | 0.2311  |
| rs58868870  | 11 | 118668296 | T | C | 1.663  | 0.09627 | ---+- | 26.7  | 8.182 | 4 | 0.08512 |
| rs498912    | 11 | 118576997 | C | T | 1.663  | 0.0964  | +?--+ | -36.7 | 3.659 | 3 | 0.3008  |
| rs11217077  | 11 | 118746223 | C | T | 1.652  | 0.09856 | +++-- | 0     | 2.152 | 4 | 0.7077  |
| rs73528892  | 11 | 72020144  | C | G | 1.652  | 0.09861 | +++?- | 34    | 7.574 | 3 | 0.05569 |
| rs647769    | 11 | 118812512 | T | C | 1.65   | 0.09891 | +---- | 0     | 3.271 | 4 | 0.5136  |

|             |    |           |   |   |        |        |       |       |        |   |         |
|-------------|----|-----------|---|---|--------|--------|-------|-------|--------|---|---------|
| rs540716    | 11 | 118685015 | T | C | 1.645  | 0.0999 | ++++- | 35.6  | 9.318  | 4 | 0.05363 |
| rs3759002   | 11 | 118136160 | A | G | 1.645  | 0.1    | +?+-  | -6.6  | 4.692  | 3 | 0.1958  |
| rs503425    | 11 | 118692727 | C | T | 1.645  | 0.1    | ++++- | 38.2  | 9.703  | 4 | 0.04574 |
| rs76160025  | 11 | 118782802 | T | C | -1.636 | 0.1018 | -?--? | 0     | 1.067  | 2 | 0.5866  |
| rs111527225 | 11 | 118065830 | A | G | 1.634  | 0.1022 | +?+-  | 0     | 2.528  | 3 | 0.4702  |
| rs6589687   | 11 | 118615660 | T | A | 1.631  | 0.1029 | +?++  | -18.9 | 4.207  | 3 | 0.24    |
| rs61506726  | 11 | 118831335 | G | A | -1.622 | 0.1047 | ----+ | 0     | 2.814  | 4 | 0.5894  |
| rs553188    | 11 | 118576762 | T | C | 1.621  | 0.1051 | +?++  | -20.2 | 4.161  | 3 | 0.2446  |
| rs10892281  | 11 | 118614397 | T | C | 1.62   | 0.1052 | +?++  | -21.4 | 4.119  | 3 | 0.2489  |
| rs497678    | 11 | 118567881 | C | T | 1.616  | 0.1061 | +++   | 0     | 3.184  | 4 | 0.5275  |
| rs11216904  | 11 | 118440863 | G | A | 1.615  | 0.1063 | ++++  | 0     | 1.637  | 4 | 0.8021  |
| rs58270621  | 11 | 118413604 | A | G | 1.613  | 0.1068 | ++++  | 0     | 1.133  | 4 | 0.8889  |
| rs11216898  | 11 | 118432852 | C | T | 1.611  | 0.1071 | ++++  | 0     | 1.649  | 4 | 0.8     |
| rs497916    | 11 | 118758089 | T | C | -1.608 | 0.1079 | +++-- | 40.1  | 10.022 | 4 | 0.04006 |
| rs8192696   | 11 | 118895686 | T | C | -1.607 | 0.108  | ----  | 0     | 0.847  | 4 | 0.932   |
| rs12224844  | 11 | 118439048 | T | A | 1.607  | 0.1081 | ++++  | 0     | 1.547  | 4 | 0.8182  |
| rs4938604   | 11 | 118846574 | C | T | -1.606 | 0.1083 | -?-?- | 0     | 0.485  | 2 | 0.7848  |
| rs2510902   | 11 | 118700218 | A | G | 1.603  | 0.109  | ++++- | 31.2  | 8.719  | 4 | 0.06852 |
| rs485901    | 11 | 118622245 | G | A | 1.602  | 0.1091 | +?++  | -16.2 | 4.305  | 3 | 0.2304  |
| rs1961138   | 11 | 118619423 | C | T | 1.601  | 0.1094 | +?++  | -16.7 | 4.285  | 3 | 0.2323  |
| rs640120    | 11 | 118618837 | A | C | 1.6    | 0.1095 | +?++  | -17.3 | 4.262  | 3 | 0.2346  |
| rs11216860  | 11 | 118240332 | C | T | -1.596 | 0.1104 | ++--  | -4.4  | 5.749  | 4 | 0.2187  |
| rs6589690   | 11 | 118632893 | A | G | 1.595  | 0.1108 | +?++  | -4.9  | 4.768  | 3 | 0.1896  |
| rs10892243  | 11 | 118441846 | C | T | 1.593  | 0.1112 | ++++  | 0     | 1.6    | 4 | 0.8087  |
| rs4938603   | 11 | 118846482 | G | A | -1.587 | 0.1125 | -?-?- | 0     | 0.328  | 2 | 0.8487  |
| rs6589677   | 11 | 118583971 | A | G | 1.587  | 0.1125 | +?++  | -6    | 4.719  | 3 | 0.1936  |
| rs4338560   | 11 | 118143368 | T | C | 1.586  | 0.1127 | +?+-  | 2.9   | 5.152  | 3 | 0.161   |
| rs7926282   | 11 | 118605914 | C | A | 1.584  | 0.1133 | ++--  | 42    | 10.353 | 4 | 0.03488 |
| rs73528897  | 11 | 72032681  | A | G | 1.581  | 0.1138 | +++?- | 28.8  | 7.022  | 3 | 0.07119 |
| rs475946    | 11 | 118629143 | T | C | 1.579  | 0.1143 | +?++  | -10.4 | 4.528  | 3 | 0.2098  |
| rs2511062   | 11 | 72871055  | C | T | -1.579 | 0.1144 | ++--  | 14.7  | 7.036  | 4 | 0.134   |
| rs10502227  | 11 | 118147496 | C | T | 1.573  | 0.1156 | +?+-  | -2.5  | 4.878  | 3 | 0.1809  |
| rs2508204   | 11 | 72001820  | C | T | 1.573  | 0.1158 | +++?- | 39.2  | 8.22   | 3 | 0.04168 |
| rs113975105 | 11 | 118836606 | G | C | -1.569 | 0.1167 | ----+ | 0     | 2.667  | 4 | 0.6149  |
| rs10790239  | 11 | 118001445 | T | C | -1.567 | 0.117  | -?--- | 0     | 0.418  | 3 | 0.9364  |
| rs1790187   | 11 | 118644213 | A | G | 1.565  | 0.1175 | +?++  | -21.7 | 4.107  | 3 | 0.2501  |
| rs60067274  | 11 | 118412296 | T | A | 1.558  | 0.1193 | ++++  | 0     | 1.529  | 4 | 0.8215  |
| rs11603267  | 11 | 118146599 | T | G | 1.557  | 0.1195 | +?+-  | -4.9  | 4.764  | 3 | 0.1899  |
| rs11216897  | 11 | 118432279 | G | A | 1.554  | 0.1202 | ++++  | 0     | 1.636  | 4 | 0.8024  |
| rs11607245  | 11 | 118843448 | T | C | -1.55  | 0.1211 | ---?- | 0     | 0.423  | 3 | 0.9354  |
| rs57669200  | 11 | 72026863  | A | G | 1.549  | 0.1213 | +++?- | 39.5  | 8.27   | 3 | 0.04075 |
| rs2277295   | 11 | 118416253 | T | C | 1.548  | 0.1216 | ++++  | 0     | 1.541  | 4 | 0.8194  |
| rs11217052  | 11 | 118717732 | G | A | 1.547  | 0.1219 | ++++  | 0     | 2.111  | 4 | 0.7153  |
| rs58753751  | 11 | 72048813  | C | T | 1.545  | 0.1224 | +++?- | 22.5  | 6.45   | 3 | 0.09165 |
| rs12788933  | 11 | 118140184 | T | C | 1.544  | 0.1227 | +?+-  | -1.8  | 4.913  | 3 | 0.1783  |
| rs688035    | 11 | 118802492 | G | C | 1.541  | 0.1234 | +--+  | 16    | 7.144  | 4 | 0.1285  |
| rs57291879  | 11 | 72041441  | A | C | 1.54   | 0.1236 | +++?- | 22.5  | 6.449  | 3 | 0.09171 |
| rs60837962  | 11 | 118438448 | T | A | 1.54   | 0.1237 | ++++  | 0     | 1.802  | 4 | 0.7721  |
| rs11235547  | 11 | 72318831  | A | G | 1.537  | 0.1242 | -?+++ | 0     | 1.819  | 3 | 0.6107  |
| rs2186780   | 11 | 118605451 | T | C | 1.537  | 0.1242 | ++--  | 39.1  | 9.847  | 4 | 0.04309 |
| rs4326835   | 11 | 118432404 | T | G | 1.537  | 0.1242 | ++++  | 0     | 1.702  | 4 | 0.7904  |
| rs59108310  | 11 | 118433729 | G | A | 1.537  | 0.1243 | ++++  | 0     | 1.652  | 4 | 0.7993  |
| rs75657287  | 11 | 118801518 | G | C | 1.535  | 0.1247 | +?+?? | 0     | 0.129  | 1 | 0.72    |
| rs564892    | 11 | 118602392 | A | T | 1.533  | 0.1253 | +++   | -31.5 | 4.563  | 4 | 0.3352  |
| rs12416741  | 11 | 72023828  | C | T | 1.531  | 0.1257 | +++?- | 41.3  | 8.514  | 3 | 0.0365  |
| rs11216886  | 11 | 118411424 | C | A | 1.53   | 0.1259 | ++++  | 0     | 1.343  | 4 | 0.854   |

|             |    |           |   |   |        |        |       |       |       |   |         |
|-------------|----|-----------|---|---|--------|--------|-------|-------|-------|---|---------|
| rs3741319   | 11 | 118415848 | C | A | 1.53   | 0.1261 | +++++ | 0     | 1.535 | 4 | 0.8204  |
| rs528056    | 11 | 118317907 | T | C | 1.53   | 0.1261 | +++++ | 0     | 1.76  | 4 | 0.7797  |
| rs3825055   | 11 | 118416073 | C | A | 1.527  | 0.1267 | +++++ | 0     | 1.521 | 4 | 0.8229  |
| rs60849224  | 11 | 72042930  | C | T | 1.525  | 0.1271 | +++?- | 22.4  | 6.445 | 3 | 0.09184 |
| rs36049191  | 11 | 72040784  | C | T | 1.525  | 0.1272 | +++?- | 22.4  | 6.445 | 3 | 0.09184 |
| rs11216902  | 11 | 118437279 | G | A | 1.525  | 0.1274 | +++++ | 0     | 1.639 | 4 | 0.8018  |
| rs11216899  | 11 | 118434421 | G | A | 1.522  | 0.128  | +++++ | 0     | 1.731 | 4 | 0.7851  |
| rs3741320   | 11 | 118415847 | C | G | 1.521  | 0.1284 | +++++ | 0     | 1.513 | 4 | 0.8244  |
| rs11216900  | 11 | 118436079 | C | G | 1.52   | 0.1285 | +++++ | 0     | 1.804 | 4 | 0.7718  |
| rs11216909  | 11 | 118449746 | T | C | 1.52   | 0.1285 | +++++ | 0     | 1.599 | 4 | 0.8089  |
| rs113145584 | 11 | 118154798 | C | G | -1.518 | 0.129  | -?-?? | 0     | 0.909 | 1 | 0.3403  |
| rs4938559   | 11 | 118718061 | T | C | 1.518  | 0.129  | +++++ | 0     | 2.002 | 4 | 0.7354  |
| rs9736327   | 11 | 118447580 | G | T | 1.518  | 0.1291 | +++++ | 0     | 1.481 | 4 | 0.83    |
| rs45505501  | 11 | 118405305 | A | G | 1.517  | 0.1292 | +++++ | 0     | 1.253 | 4 | 0.8693  |
| rs9735421   | 11 | 118447597 | A | G | 1.516  | 0.1295 | +++++ | 0     | 1.475 | 4 | 0.831   |
| rs60753148  | 11 | 118434835 | T | C | 1.516  | 0.1296 | +++++ | 0     | 1.706 | 4 | 0.7896  |
| rs557990    | 11 | 118601363 | T | C | 1.513  | 0.1302 | +++-- | -29.2 | 4.644 | 4 | 0.3258  |
| rs4938560   | 11 | 118718062 | G | A | 1.512  | 0.1306 | +++++ | 0     | 1.99  | 4 | 0.7375  |
| rs11216881  | 11 | 118409539 | G | A | 1.511  | 0.1307 | +++++ | 0     | 1.278 | 4 | 0.8651  |
| rs45485302  | 11 | 118405377 | A | C | 1.511  | 0.1308 | +++++ | 0     | 1.192 | 4 | 0.8794  |
| rs7932700   | 11 | 118411713 | T | G | 1.509  | 0.1314 | +++++ | 0     | 1.379 | 4 | 0.8479  |
| rs4537793   | 11 | 118053156 | A | C | 1.508  | 0.1316 | +++++ | 0     | 0.725 | 4 | 0.9481  |
| rs73022038  | 11 | 118408471 | T | C | 1.508  | 0.1316 | +++++ | 0     | 1.244 | 4 | 0.8707  |
| rs11216880  | 11 | 118409536 | A | G | 1.507  | 0.1319 | +++++ | 0     | 1.257 | 4 | 0.8686  |
| rs45548238  | 11 | 118405437 | T | C | 1.506  | 0.1319 | +++++ | 0     | 1.213 | 4 | 0.876   |
| rs73022041  | 11 | 118408789 | C | T | 1.506  | 0.1322 | +++++ | 0     | 1.237 | 4 | 0.872   |
| rs6589675   | 11 | 118569414 | C | G | 1.505  | 0.1323 | +?-++ | 0     | 2.314 | 3 | 0.5099  |
| rs112965917 | 11 | 118725189 | A | T | 1.503  | 0.1329 | +?-++ | 0     | 1.927 | 3 | 0.5877  |
| rs45522239  | 11 | 118405438 | G | A | 1.503  | 0.1329 | +++++ | 0     | 1.198 | 4 | 0.8784  |
| rs112753655 | 11 | 118154795 | A | G | -1.501 | 0.1333 | -?-?? | 0     | 0.942 | 1 | 0.3317  |
| rs9735449   | 11 | 118448087 | T | C | 1.501  | 0.1333 | +++++ | 0     | 1.504 | 4 | 0.8259  |
| rs73023350  | 11 | 118449396 | A | G | 1.501  | 0.1334 | +++++ | 0     | 1.55  | 4 | 0.8177  |
| rs7131631   | 11 | 118409374 | A | G | 1.5    | 0.1337 | +++++ | 0     | 1.223 | 4 | 0.8744  |
| rs45474901  | 11 | 118405453 | C | T | 1.499  | 0.1339 | +++++ | 0     | 1.356 | 4 | 0.8518  |
| rs7128587   | 11 | 118409302 | A | G | 1.499  | 0.1339 | +++++ | 0     | 1.222 | 4 | 0.8745  |
| rs11216883  | 11 | 118410468 | G | A | 1.499  | 0.134  | +++++ | 0     | 1.269 | 4 | 0.8667  |
| rs11216923  | 11 | 118465501 | G | A | 1.499  | 0.134  | +++++ | 0     | 1.448 | 4 | 0.8359  |
| rs561775    | 11 | 118341212 | G | A | 1.497  | 0.1344 | +++++ | 0     | 2.693 | 4 | 0.6105  |
| rs73022042  | 11 | 118408893 | A | G | 1.496  | 0.1347 | +++++ | 0     | 1.218 | 4 | 0.8751  |
| rs74404016  | 11 | 118408653 | T | C | 1.495  | 0.1348 | +++++ | 0     | 1.222 | 4 | 0.8745  |
| rs11216885  | 11 | 118410545 | G | A | 1.495  | 0.135  | +++++ | 0     | 1.253 | 4 | 0.8693  |
| rs11216921  | 11 | 118464815 | C | G | 1.494  | 0.1351 | +++++ | 0     | 1.516 | 4 | 0.8237  |
| rs7126175   | 11 | 118450875 | T | C | 1.493  | 0.1355 | +++++ | 0     | 1.577 | 4 | 0.8129  |
| rs7101585   | 11 | 118409583 | A | G | 1.493  | 0.1356 | +++++ | 0     | 1.233 | 4 | 0.8727  |
| rs11216884  | 11 | 118410488 | C | T | 1.492  | 0.1358 | +++++ | 0     | 1.256 | 4 | 0.8688  |
| rs11216925  | 11 | 118471423 | C | T | 1.492  | 0.1358 | +++++ | 0     | 1.803 | 4 | 0.772   |
| rs61290697  | 11 | 118412358 | T | C | 1.491  | 0.1359 | +++++ | 0     | 1.238 | 4 | 0.8719  |
| rs17742     | 11 | 118473385 | C | T | 1.49   | 0.1361 | +++++ | 0     | 1.676 | 4 | 0.7951  |
| rs535207    | 11 | 118408033 | G | A | 1.491  | 0.1361 | +++++ | 0     | 1.193 | 4 | 0.8793  |
| rs11216912  | 11 | 118452334 | C | G | 1.49   | 0.1363 | +++++ | 0     | 1.6   | 4 | 0.8087  |
| rs11216922  | 11 | 118465295 | G | A | 1.488  | 0.1367 | +++++ | 0     | 1.438 | 4 | 0.8376  |
| rs7115634   | 11 | 118466249 | G | A | 1.487  | 0.1369 | +++++ | 0     | 1.488 | 4 | 0.8287  |
| rs10892315  | 11 | 118831727 | C | T | -1.487 | 0.1371 | ----+ | 0     | 2.399 | 4 | 0.6629  |
| rs11216911  | 11 | 118451901 | C | T | 1.485  | 0.1375 | +++++ | 0     | 1.563 | 4 | 0.8154  |
| rs12577045  | 11 | 118151446 | A | G | -1.484 | 0.1379 | -?-?? | 0     | 0.79  | 1 | 0.374   |
| rs10892245  | 11 | 118472354 | A | C | 1.482  | 0.1382 | +++++ | 0     | 1.856 | 4 | 0.7622  |

|             |    |           |   |   |        |        |       |       |       |   |         |
|-------------|----|-----------|---|---|--------|--------|-------|-------|-------|---|---------|
| rs11216913  | 11 | 118453681 | G | A | 1.481  | 0.1385 | ++++  | 0     | 1.626 | 4 | 0.8041  |
| rs55844025  | 11 | 118446298 | T | C | 1.48   | 0.1388 | ++++  | 0     | 1.467 | 4 | 0.8325  |
| rs11216906  | 11 | 118443944 | A | G | 1.479  | 0.139  | ++++  | 0     | 1.641 | 4 | 0.8014  |
| rs11216910  | 11 | 118450046 | G | A | 1.476  | 0.1398 | ++++  | 0     | 1.547 | 4 | 0.8183  |
| rs535327    | 11 | 118341785 | G | A | 1.475  | 0.1401 | ++++  | 0     | 2.676 | 4 | 0.6135  |
| rs1623316   | 11 | 118757219 | G | C | 1.475  | 0.1402 | +++?  | 0     | 2.495 | 3 | 0.4762  |
| rs75128335  | 11 | 118072915 | A | G | 1.475  | 0.1402 | +?++  | 0     | 2.04  | 3 | 0.5642  |
| rs472837    | 11 | 72007150  | T | C | 1.474  | 0.1404 | +++?  | 35.8  | 7.785 | 3 | 0.05067 |
| rs524936    | 11 | 118341921 | A | G | 1.474  | 0.1406 | ++++  | 0     | 2.74  | 4 | 0.6022  |
| rs3741323   | 11 | 118405641 | G | A | 1.473  | 0.1407 | ++++  | 0     | 1.182 | 4 | 0.881   |
| rs7929887   | 11 | 118428791 | G | A | 1.473  | 0.1407 | ++++  | 0     | 1.48  | 4 | 0.8301  |
| rs11216890  | 11 | 118421569 | G | C | 1.473  | 0.1408 | ++++  | 0     | 1.674 | 4 | 0.7955  |
| rs537975    | 11 | 118362869 | T | C | 1.472  | 0.1411 | ++++  | 0     | 0.528 | 4 | 0.9707  |
| rs590732    | 11 | 72006394  | T | C | 1.471  | 0.1414 | +++?  | 35.8  | 7.79  | 3 | 0.05055 |
| rs11216917  | 11 | 118462160 | G | T | 1.469  | 0.1417 | ++++  | 0     | 1.564 | 4 | 0.8153  |
| rs12576119  | 11 | 118158441 | A | G | -1.47  | 0.1417 | -?-?? | 0     | 0.865 | 1 | 0.3523  |
| rs57438673  | 11 | 118459039 | A | G | 1.469  | 0.1419 | ++++  | 0     | 1.733 | 4 | 0.7847  |
| rs73023341  | 11 | 118445585 | G | A | 1.467  | 0.1423 | ++++  | 0     | 1.565 | 4 | 0.815   |
| rs10892317  | 11 | 118832035 | C | T | -1.467 | 0.1424 | ----  | 0     | 2.678 | 4 | 0.6131  |
| rs492471    | 11 | 118689745 | T | C | 1.466  | 0.1426 | ++++  | 2.1   | 6.126 | 4 | 0.1899  |
| rs17842763  | 11 | 118454177 | G | A | 1.465  | 0.1429 | ++++  | 0     | 1.574 | 4 | 0.8134  |
| rs113054880 | 11 | 118459702 | G | C | 1.464  | 0.1432 | ++++  | 0     | 1.751 | 4 | 0.7814  |
| rs6589710   | 11 | 118837460 | T | A | -1.463 | 0.1433 | ---?  | 0     | 0.484 | 3 | 0.9224  |
| rs3901422   | 11 | 118837272 | A | G | -1.463 | 0.1435 | ---?  | 0     | 0.445 | 3 | 0.9309  |
| rs146026283 | 11 | 118296322 | A | C | 1.462  | 0.1437 | +?++? | 0     | 0.604 | 2 | 0.7392  |
| rs10892318  | 11 | 118848725 | A | G | -1.461 | 0.1439 | ---?  | 0     | 0.435 | 3 | 0.9329  |
| rs11216891  | 11 | 118422234 | T | A | 1.46   | 0.1444 | ++++  | 0     | 1.655 | 4 | 0.7989  |
| rs11216907  | 11 | 118444525 | A | G | 1.459  | 0.1445 | ++++  | 0     | 1.719 | 4 | 0.7873  |
| rs113739713 | 11 | 118420101 | G | A | 1.459  | 0.1447 | ++++  | 0     | 1.568 | 4 | 0.8146  |
| rs17092756  | 11 | 118457630 | C | G | 1.458  | 0.1449 | ++++  | 0     | 1.701 | 4 | 0.7905  |
| rs11216924  | 11 | 118470092 | G | C | 1.457  | 0.1451 | ++++  | 0     | 1.717 | 4 | 0.7877  |
| rs2277291   | 11 | 118435756 | T | C | 1.456  | 0.1453 | ++++  | 0     | 1.84  | 4 | 0.7651  |
| rs7116690   | 11 | 118837742 | G | A | -1.456 | 0.1454 | ---?  | 0     | 0.43  | 3 | 0.9339  |
| rs544096    | 11 | 118594326 | G | A | 1.453  | 0.1463 | +++   | 0     | 3.922 | 4 | 0.4166  |
| rs495132    | 11 | 118335927 | A | G | 1.45   | 0.147  | ++++  | 0     | 2.73  | 4 | 0.604   |
| rs10892301  | 11 | 118735476 | A | G | 1.45   | 0.1472 | ++++  | 0     | 2.05  | 4 | 0.7266  |
| rs3741324   | 11 | 118405835 | A | G | 1.449  | 0.1472 | ++++  | 0     | 1.171 | 4 | 0.8829  |
| rs4435039   | 11 | 118297391 | G | A | 1.448  | 0.1475 | ++++  | 0     | 2.368 | 4 | 0.6685  |
| rs11216926  | 11 | 118471996 | T | C | 1.448  | 0.1477 | ++++  | 0     | 1.786 | 4 | 0.775   |
| rs7931564   | 11 | 118469571 | G | A | 1.448  | 0.1477 | ++++  | 0     | 1.647 | 4 | 0.8002  |
| rs11216916  | 11 | 118461605 | C | T | 1.447  | 0.1479 | ++++  | 0     | 1.512 | 4 | 0.8245  |
| rs2120269   | 11 | 118151135 | C | T | -1.445 | 0.1485 | -?-?? | 0     | 0.664 | 1 | 0.4153  |
| rs188843024 | 11 | 118453478 | A | G | -1.443 | 0.1489 | ---?  | -19.6 | 4.179 | 3 | 0.2427  |
| rs2277293   | 11 | 118422868 | T | C | 1.443  | 0.1489 | ++++  | 0     | 1.725 | 4 | 0.7861  |
| rs61902060  | 11 | 118839828 | G | C | -1.442 | 0.1492 | ---?  | 0     | 0.414 | 3 | 0.9374  |
| rs629470    | 11 | 118320553 | A | G | 1.441  | 0.1495 | ++++  | 0     | 0.89  | 4 | 0.926   |
| rs3741325   | 11 | 118405989 | G | A | 1.44   | 0.1498 | ++++  | 0     | 1.493 | 4 | 0.8278  |
| rs1784257   | 11 | 72007984  | C | T | 1.439  | 0.1501 | +++?  | 36.2  | 7.833 | 3 | 0.04958 |
| rs60112336  | 11 | 118453483 | T | C | 1.439  | 0.1501 | ++++  | 0     | 1.573 | 4 | 0.8136  |
| rs11217107  | 11 | 118839268 | C | G | -1.438 | 0.1505 | ---?  | 0     | 0.412 | 3 | 0.9377  |
| rs187547749 | 11 | 118439159 | T | C | -1.437 | 0.1507 | ---?  | 7.5   | 5.408 | 3 | 0.1443  |
| rs58745438  | 11 | 118848315 | C | T | -1.437 | 0.1507 | ---?  | 0     | 0.43  | 3 | 0.934   |
| rs59176377  | 11 | 118419295 | A | G | 1.437  | 0.1507 | ++++  | 0     | 1.279 | 4 | 0.865   |
| rs67774926  | 11 | 118157623 | G | C | -1.433 | 0.1519 | -?-?? | 0     | 0.828 | 1 | 0.3629  |
| rs17122278  | 11 | 118449370 | G | A | 1.431  | 0.1525 | ++++  | 0     | 1.735 | 4 | 0.7844  |
| rs189530708 | 11 | 118272454 | G | C | -1.431 | 0.1526 | --??  | 13.2  | 4.611 | 2 | 0.09973 |

|            |    |           |   |   |        |        |       |       |        |   |         |
|------------|----|-----------|---|---|--------|--------|-------|-------|--------|---|---------|
| rs4938494  | 11 | 118150735 | C | G | -1.429 | 0.153  | -?-?? | 0     | 0.69   | 1 | 0.4062  |
| rs74384601 | 11 | 118449313 | G | A | -1.428 | 0.1532 | ---+? | 1.1   | 5.054  | 3 | 0.1679  |
| rs12797009 | 11 | 118826192 | A | C | 1.424  | 0.1545 | +?+?- | 0     | 1.48   | 2 | 0.4772  |
| rs61900159 | 11 | 118839133 | C | G | -1.423 | 0.1548 | ---?- | 0     | 0.438  | 3 | 0.9322  |
| rs11216892 | 11 | 118424008 | T | C | 1.422  | 0.155  | +++++ | 0     | 1.524  | 4 | 0.8224  |
| rs4938602  | 11 | 118846466 | A | G | -1.422 | 0.1551 | ---?- | 0     | 0.415  | 3 | 0.937   |
| rs7126476  | 11 | 118834784 | G | A | -1.422 | 0.1551 | ---?- | 0     | 0.423  | 3 | 0.9354  |
| rs3890562  | 11 | 118837113 | G | A | -1.421 | 0.1552 | ---?- | 0     | 0.218  | 3 | 0.9746  |
| rs17122269 | 11 | 118445275 | C | T | 1.42   | 0.1558 | +++++ | 0     | 1.849  | 4 | 0.7634  |
| rs45534632 | 11 | 118840705 | G | A | 1.419  | 0.1558 | +--+? | 0     | 2.919  | 3 | 0.4043  |
| rs56140791 | 11 | 118167190 | C | T | -1.418 | 0.1562 | -?-?? | 0     | 0.805  | 1 | 0.3695  |
| rs56403966 | 11 | 118425051 | A | G | 1.416  | 0.1567 | +++++ | 0     | 1.599  | 4 | 0.809   |
| rs7108845  | 11 | 118407523 | G | T | 1.414  | 0.1573 | +++++ | 0     | 1.233  | 4 | 0.8726  |
| rs55857590 | 11 | 118425063 | G | A | 1.413  | 0.1576 | +++++ | 0     | 1.535  | 4 | 0.8204  |
| rs11216889 | 11 | 118421512 | A | G | 1.413  | 0.1577 | +++++ | 0     | 1.909  | 4 | 0.7524  |
| rs55736521 | 11 | 118840506 | T | C | 1.413  | 0.1577 | +--+? | 0     | 2.889  | 3 | 0.4091  |
| rs12420418 | 11 | 118840857 | T | C | -1.413 | 0.1578 | ---?- | 0     | 0.2    | 3 | 0.9775  |
| rs67604597 | 11 | 118154836 | G | T | -1.411 | 0.1582 | -?-?? | 0     | 0.799  | 1 | 0.3714  |
| rs1047079  | 11 | 118473231 | C | T | 1.409  | 0.1587 | +++++ | 0     | 1.86   | 4 | 0.7614  |
| rs60024067 | 11 | 72028610  | C | T | 1.409  | 0.1588 | +++?- | 34.8  | 7.67   | 3 | 0.05334 |
| rs11216914 | 11 | 118456414 | C | T | 1.409  | 0.159  | +++++ | 0     | 1.55   | 4 | 0.8177  |
| rs60652614 | 11 | 118168543 | T | G | -1.408 | 0.1592 | -?-?? | 0     | 0.736  | 1 | 0.3909  |
| rs61706007 | 11 | 118167278 | G | T | -1.408 | 0.1592 | -?-?? | 0     | 0.823  | 1 | 0.3642  |
| rs73022058 | 11 | 118423672 | T | C | 1.407  | 0.1595 | +++++ | 0     | 1.812  | 4 | 0.7702  |
| rs11217108 | 11 | 118841761 | T | C | -1.405 | 0.16   | ---?- | 0     | 0.204  | 3 | 0.9769  |
| rs2508922  | 11 | 118681088 | A | G | 1.405  | 0.16   | +++++ | 40.5  | 10.081 | 4 | 0.03908 |
| rs55940627 | 11 | 118163920 | A | G | -1.404 | 0.1602 | -?-?? | 0     | 0.742  | 1 | 0.389   |
| rs550999   | 11 | 118811684 | G | C | 1.404  | 0.1603 | +---- | -34.8 | 4.45   | 4 | 0.3486  |
| rs56357739 | 11 | 118158507 | G | A | -1.403 | 0.1605 | -?-?? | 0     | 0.666  | 1 | 0.4145  |
| rs57075232 | 11 | 118159371 | T | C | -1.403 | 0.1605 | -?-?? | 0     | 0.688  | 1 | 0.407   |
| rs572126   | 11 | 118359161 | G | A | 1.402  | 0.1609 | +++++ | 0     | 0.457  | 4 | 0.9776  |
| rs4938501  | 11 | 118166497 | C | T | -1.401 | 0.1611 | -?-?? | 0     | 0.8    | 1 | 0.3711  |
| rs56066890 | 11 | 118169790 | C | T | -1.398 | 0.1621 | -?-?? | 0     | 0.729  | 1 | 0.3932  |
| rs59134737 | 11 | 118160959 | T | G | -1.395 | 0.1631 | -?-?? | 0     | 0.716  | 1 | 0.3976  |
| rs12576947 | 11 | 118158055 | C | T | -1.393 | 0.1635 | -?-?? | 0     | 0.682  | 1 | 0.4089  |
| rs59399105 | 11 | 118168568 | A | C | -1.393 | 0.1637 | -?-?? | 0     | 0.762  | 1 | 0.3826  |
| rs58093803 | 11 | 118168156 | C | T | -1.391 | 0.1641 | -?-?? | 0     | 0.765  | 1 | 0.3819  |
| rs59450866 | 11 | 118167707 | T | C | -1.391 | 0.1641 | -?-?? | 0     | 0.765  | 1 | 0.3818  |
| rs7110019  | 11 | 118168617 | G | A | -1.391 | 0.1643 | -?-?? | 0     | 0.862  | 1 | 0.3531  |
| rs12576941 | 11 | 118158002 | C | T | -1.39  | 0.1644 | -?-?? | 0     | 0.687  | 1 | 0.4072  |
| rs623500   | 11 | 118828942 | G | A | 1.389  | 0.1647 | +?--+ | 0     | 1.922  | 2 | 0.3825  |
| rs3887015  | 11 | 118156410 | C | T | -1.385 | 0.166  | -?-?? | 0     | 0.696  | 1 | 0.4042  |
| rs56318049 | 11 | 118166608 | C | T | -1.385 | 0.166  | -?-?? | 0     | 0.776  | 1 | 0.3785  |
| rs66832804 | 11 | 118157049 | A | T | -1.385 | 0.166  | -?-?? | 0     | 0.696  | 1 | 0.4043  |
| rs61390396 | 11 | 118156718 | T | C | -1.384 | 0.1663 | -?-?? | 0     | 0.697  | 1 | 0.4038  |
| rs55910314 | 11 | 118163780 | T | C | -1.384 | 0.1664 | -?-?? | 0     | 0.778  | 1 | 0.3778  |
| rs2277292  | 11 | 118425419 | T | G | 1.383  | 0.1667 | +++++ | 0     | 1.461  | 4 | 0.8336  |
| rs56938099 | 11 | 118156688 | G | A | -1.383 | 0.1667 | -?-?? | 0     | 0.7    | 1 | 0.4029  |
| rs55899310 | 11 | 118158702 | C | T | -1.382 | 0.1671 | -?-?? | 0     | 0.702  | 1 | 0.4022  |
| rs12576100 | 11 | 118158281 | A | G | -1.38  | 0.1677 | -?-?? | 0     | 0.705  | 1 | 0.4012  |
| rs12576118 | 11 | 118158440 | A | G | -1.379 | 0.1678 | -?-?? | 0     | 0.705  | 1 | 0.401   |
| rs11216887 | 11 | 118420736 | C | T | 1.378  | 0.1681 | +++++ | 0     | 1.424  | 4 | 0.8401  |
| rs11216896 | 11 | 118430048 | T | C | 1.377  | 0.1686 | +++++ | 0     | 1.608  | 4 | 0.8073  |
| rs4938499  | 11 | 118162496 | C | T | -1.377 | 0.1686 | -?-?? | 0     | 0.791  | 1 | 0.3738  |
| rs79915705 | 11 | 72016091  | C | T | 1.377  | 0.1686 | +++?- | 0     | 1.302  | 3 | 0.7286  |
| rs55798741 | 11 | 118154114 | T | G | -1.376 | 0.1688 | -?-?? | 0     | 0.78   | 1 | 0.377   |

|             |    |           |   |   |        |        |       |       |        |   |          |
|-------------|----|-----------|---|---|--------|--------|-------|-------|--------|---|----------|
| rs55806415  | 11 | 118162862 | A | G | -1.376 | 0.1689 | -?-?? | 0     | 0.792  | 1 | 0.3734   |
| rs58520343  | 11 | 118155000 | T | A | -1.376 | 0.1689 | -?-?? | 0     | 0.712  | 1 | 0.3989   |
| rs1074459   | 11 | 118155997 | C | T | -1.374 | 0.1696 | -?-?? | 0     | 0.715  | 1 | 0.3978   |
| rs58210741  | 11 | 118159326 | G | C | -1.373 | 0.1697 | -?-?? | 0     | 0.739  | 1 | 0.39     |
| rs55815657  | 11 | 118155074 | A | G | -1.372 | 0.17   | -?-?? | 0     | 0.717  | 1 | 0.3971   |
| rs67462512  | 11 | 118155336 | C | G | -1.37  | 0.1706 | -?-?? | 0     | 0.713  | 1 | 0.3983   |
| rs111227443 | 11 | 118590961 | T | C | 1.37   | 0.1707 | -?+++ | 0     | 2.74   | 3 | 0.4334   |
| rs58983315  | 11 | 118167759 | A | G | -1.37  | 0.1707 | -?-?? | 0     | 0.686  | 1 | 0.4075   |
| rs1074457   | 11 | 118156117 | T | A | -1.369 | 0.171  | -?-?? | 0     | 0.723  | 1 | 0.3951   |
| rs12577820  | 11 | 118164233 | T | C | -1.368 | 0.1714 | -?-?? | 0     | 0.807  | 1 | 0.3691   |
| rs56224295  | 11 | 118161891 | A | G | -1.365 | 0.1724 | -?-?? | 0     | 0.756  | 1 | 0.3847   |
| rs112799932 | 11 | 118585146 | G | T | 1.364  | 0.1725 | +++-- | 30.3  | 8.602  | 4 | 0.07184  |
| rs7113731   | 11 | 118831824 | G | A | -1.364 | 0.1726 | ---?- | 0     | 0.383  | 3 | 0.9437   |
| rs56020103  | 11 | 118172132 | T | C | -1.363 | 0.1728 | -?-?? | 0     | 0.749  | 1 | 0.3869   |
| rs11552421  | 11 | 118430519 | T | C | 1.363  | 0.173  | +++++ | 0     | 1.619  | 4 | 0.8055   |
| rs573971    | 11 | 118393396 | A | G | 1.363  | 0.173  | +++++ | 0     | 0.449  | 4 | 0.9783   |
| rs56346212  | 11 | 118172342 | A | T | -1.362 | 0.1733 | -?-?? | 0     | 0.751  | 1 | 0.3861   |
| rs56292628  | 11 | 118163872 | A | G | -1.359 | 0.1742 | -?-?? | 0     | 0.823  | 1 | 0.3644   |
| rs7480736   | 11 | 118172364 | C | T | -1.357 | 0.1747 | -?-?? | 0     | 0.759  | 1 | 0.3837   |
| rs4635088   | 11 | 118832924 | C | G | -1.356 | 0.175  | ---?- | 0     | 0.383  | 3 | 0.9437   |
| rs894677    | 11 | 118172535 | T | C | -1.353 | 0.1759 | -?-?? | 0     | 0.758  | 1 | 0.3839   |
| rs111942423 | 11 | 118429764 | G | T | 1.353  | 0.176  | +++++ | 0     | 1.496  | 4 | 0.8273   |
| rs55789743  | 11 | 118171949 | A | C | -1.352 | 0.1763 | -?-?? | 0     | 0.767  | 1 | 0.381    |
| rs60618948  | 11 | 118155814 | A | G | -1.351 | 0.1767 | -?-?? | 0     | 0.754  | 1 | 0.3853   |
| rs2187557   | 11 | 118148271 | T | C | -1.349 | 0.1772 | -?-?+ | -86.1 | 2.149  | 2 | 0.3414   |
| rs3132786   | 11 | 118365956 | C | T | 1.345  | 0.1785 | +++++ | 0     | 0.506  | 4 | 0.9729   |
| rs4310630   | 11 | 118836638 | G | A | -1.344 | 0.1788 | ---?- | 0     | 0.432  | 3 | 0.9336   |
| rs61150131  | 11 | 118752178 | C | T | 1.336  | 0.1814 | +++++ | 0     | 1.652  | 4 | 0.7995   |
| rs11607835  | 11 | 118835258 | C | T | -1.335 | 0.1819 | ---?- | 0     | 0.437  | 3 | 0.9325   |
| rs7112758   | 11 | 118836821 | A | G | -1.333 | 0.1825 | ---?- | 0     | 0.403  | 3 | 0.9397   |
| rs60545357  | 11 | 118281418 | C | A | 1.32   | 0.1867 | ++++- | 0     | 1.551  | 4 | 0.8175   |
| rs118020807 | 11 | 118759905 | A | C | -1.317 | 0.1878 | -?--? | 0     | 1.306  | 2 | 0.5205   |
| rs12289253  | 11 | 118405068 | G | A | 1.315  | 0.1885 | +++++ | 0     | 0.783  | 4 | 0.9407   |
| rs7110743   | 11 | 118825762 | A | C | 1.314  | 0.1887 | +?+?- | 0     | 1.806  | 2 | 0.4054   |
| rs1790186   | 11 | 118846355 | T | C | -1.312 | 0.1895 | -?+?? | -48.7 | 2.017  | 1 | 0.1556   |
| rs543583    | 11 | 118847196 | A | G | -1.308 | 0.191  | -?+?? | -49.7 | 2.004  | 1 | 0.1569   |
| rs7940757   | 11 | 118055273 | T | C | 1.305  | 0.192  | +++++ | 0     | 0.43   | 4 | 0.9799   |
| rs6589650   | 11 | 118055217 | C | T | 1.301  | 0.1934 | +++++ | 0     | 0.429  | 4 | 0.98     |
| rs7107756   | 11 | 118717708 | A | G | 1.3    | 0.1935 | +++++ | 0     | 2.945  | 4 | 0.5671   |
| rs586370    | 11 | 118816353 | A | G | -1.3   | 0.1936 | -?--- | 0     | 0.719  | 3 | 0.8687   |
| rs7944087   | 11 | 118055733 | T | C | 1.297  | 0.1945 | +++++ | 0     | 0.416  | 4 | 0.9812   |
| rs75488969  | 11 | 118712509 | T | C | 1.297  | 0.1947 | +?-++ | 0     | 2.814  | 3 | 0.4212   |
| rs11216804  | 11 | 118057320 | G | A | 1.293  | 0.196  | +++++ | 0     | 0.421  | 4 | 0.9807   |
| rs4639966   | 11 | 118573519 | C | T | 1.292  | 0.1964 | +++-- | 36.1  | 9.395  | 4 | 0.05195  |
| rs548877    | 11 | 118300240 | G | A | 1.291  | 0.1966 | +++++ | 0     | 1.57   | 4 | 0.8142   |
| rs73530785  | 11 | 72152606  | G | A | 1.291  | 0.1968 | +++?- | -33.1 | 3.755  | 3 | 0.2891   |
| rs7944321   | 11 | 118055801 | A | G | 1.29   | 0.197  | +++++ | 0     | 0.322  | 4 | 0.9884   |
| rs58682117  | 11 | 72531000  | C | T | -1.29  | 0.1972 | +---+ | 55.2  | 13.404 | 4 | 0.009462 |
| rs7931206   | 11 | 118056092 | C | T | 1.288  | 0.1977 | +++++ | 0     | 0.419  | 4 | 0.9809   |
| rs57464210  | 11 | 72043183  | G | T | 1.285  | 0.199  | +++?- | 26.8  | 6.831  | 3 | 0.07748  |
| rs12295634  | 11 | 118054431 | T | C | 1.282  | 0.2    | +++++ | 0     | 0.335  | 4 | 0.9874   |
| rs45480496  | 11 | 118270715 | A | G | 1.276  | 0.2018 | ++++- | 0     | 1.357  | 4 | 0.8516   |
| rs34815971  | 11 | 118301066 | G | A | 1.272  | 0.2034 | +++++ | 0     | 1.558  | 4 | 0.8163   |
| rs7935561   | 11 | 118056722 | A | G | 1.268  | 0.2049 | +++++ | 0     | 0.325  | 4 | 0.9882   |
| rs113971393 | 11 | 72076181  | C | T | 1.267  | 0.2051 | +++?- | 0     | 2.481  | 3 | 0.4787   |
| rs12274740  | 11 | 118054128 | C | T | 1.264  | 0.2063 | +++++ | 0     | 0.345  | 4 | 0.9868   |

|             |    |           |   |   |        |        |       |       |       |   |         |
|-------------|----|-----------|---|---|--------|--------|-------|-------|-------|---|---------|
| rs117498055 | 11 | 72022810  | A | G | 1.261  | 0.2073 | +?+?+ | 0     | 0.735 | 2 | 0.6925  |
| rs117091621 | 11 | 72026473  | T | C | 1.26   | 0.2078 | +?+?+ | 0     | 0.732 | 2 | 0.6936  |
| rs117392768 | 11 | 72043182  | A | T | 1.259  | 0.2081 | +?+?+ | 0     | 1.543 | 2 | 0.4624  |
| rs510997    | 11 | 118302901 | C | T | 1.259  | 0.2082 | +++++ | 0     | 1.662 | 4 | 0.7977  |
| rs79281178  | 11 | 118298041 | G | C | 1.259  | 0.2082 | +++++ | 0     | 1.583 | 4 | 0.8118  |
| rs7124100   | 11 | 118290169 | A | G | 1.251  | 0.211  | +++++ | 0     | 1.764 | 4 | 0.779   |
| rs117705968 | 11 | 72037907  | A | C | 1.248  | 0.2119 | +?+?+ | 0     | 1.507 | 2 | 0.4707  |
| rs117902312 | 11 | 72042303  | G | C | 1.244  | 0.2135 | +?+?+ | 0     | 1.492 | 2 | 0.4743  |
| rs7944366   | 11 | 118056047 | G | A | 1.243  | 0.2138 | +++++ | 0     | 0.34  | 4 | 0.9871  |
| rs77342802  | 11 | 72012038  | C | G | 1.234  | 0.2171 | +?+?+ | 0     | 0.871 | 2 | 0.6468  |
| rs116888156 | 11 | 72009595  | A | G | 1.233  | 0.2178 | +?+?+ | 0     | 0.919 | 2 | 0.6316  |
| rs117225442 | 11 | 72060986  | A | G | 1.232  | 0.2179 | +?+?+ | 0     | 1.437 | 2 | 0.4875  |
| rs11216802  | 11 | 118057227 | T | C | 1.231  | 0.2182 | +++++ | 0     | 0.347 | 4 | 0.9866  |
| rs11216803  | 11 | 118057244 | A | C | 1.23   | 0.2187 | +++++ | 0     | 0.346 | 4 | 0.9866  |
| rs117524306 | 11 | 72014266  | G | A | 1.23   | 0.2187 | +?+?+ | 0     | 0.861 | 2 | 0.6502  |
| rs56754533  | 11 | 118188276 | A | G | -1.229 | 0.2192 | -?--+ | 0     | 1.401 | 3 | 0.7053  |
| rs1561966   | 11 | 118221474 | A | G | -1.228 | 0.2194 | +++-- | 4.2   | 6.263 | 4 | 0.1804  |
| rs143605660 | 11 | 118707035 | A | G | 1.227  | 0.2199 | -?+++ | -66.6 | 3.002 | 3 | 0.3914  |
| rs7940717   | 11 | 118055110 | T | G | 1.226  | 0.2203 | +++++ | 0     | 0.32  | 4 | 0.9885  |
| rs117346296 | 11 | 72025140  | A | G | 1.224  | 0.2208 | +?+?+ | 0     | 0.649 | 2 | 0.7229  |
| rs118115020 | 11 | 72067731  | T | C | 1.223  | 0.2213 | +?+?+ | 0     | 1.69  | 2 | 0.4296  |
| rs7947185   | 11 | 118214726 | C | T | -1.218 | 0.2233 | ---?+ | 28    | 6.942 | 3 | 0.07378 |
| rs7939212   | 11 | 72021876  | T | G | 1.217  | 0.2235 | +?+?+ | 0     | 0.774 | 2 | 0.6791  |
| rs7940087   | 11 | 72021877  | T | C | 1.216  | 0.2241 | +?+?+ | 0     | 0.77  | 2 | 0.6804  |
| rs7929825   | 11 | 118788081 | G | C | -1.214 | 0.2246 | ----+ | 33.6  | 9.04  | 4 | 0.06011 |
| rs11217068  | 11 | 118729283 | T | C | -1.213 | 0.2252 | -?+-- | 7.7   | 5.418 | 3 | 0.1436  |
| rs73613959  | 11 | 118263054 | A | G | 1.212  | 0.2255 | ++++- | 0     | 1.378 | 4 | 0.8481  |
| rs73613993  | 11 | 118296007 | C | T | 1.21   | 0.2261 | +++++ | 0     | 1.763 | 4 | 0.7792  |
| rs3212263   | 11 | 118216423 | G | A | -1.21  | 0.2262 | +++-- | -0.1  | 5.996 | 4 | 0.1994  |
| rs117215416 | 11 | 72046796  | C | T | 1.208  | 0.2271 | +?+?+ | 0     | 1.373 | 2 | 0.5034  |
| rs117999328 | 11 | 72019118  | C | T | 1.206  | 0.2276 | +?+?+ | 0     | 0.75  | 2 | 0.6872  |
| rs118089225 | 11 | 72018472  | T | C | 1.206  | 0.2276 | +?+?+ | 0     | 0.75  | 2 | 0.6872  |
| rs2282550   | 11 | 118220035 | C | T | -1.204 | 0.2287 | +++-- | 6.5   | 6.42  | 4 | 0.1699  |
| rs12804550  | 11 | 118011860 | A | G | -1.202 | 0.2294 | -?--- | 0     | 0.87  | 3 | 0.8326  |
| rs7938979   | 11 | 72021720  | C | G | 1.202  | 0.2294 | +?+?+ | 0     | 0.736 | 2 | 0.6921  |
| rs117954624 | 11 | 72028005  | G | A | 1.201  | 0.2298 | +?+?+ | 0     | 0.761 | 2 | 0.6836  |
| rs11606719  | 11 | 118782474 | G | C | 1.197  | 0.2314 | +++?+ | 0     | 2.41  | 3 | 0.4918  |
| rs1079118   | 11 | 118258056 | A | G | 1.194  | 0.2325 | ++++- | 0     | 1.226 | 4 | 0.8738  |
| rs117237510 | 11 | 72009451  | T | C | 1.19   | 0.2339 | +?+?+ | 0     | 0.785 | 2 | 0.6754  |
| rs117939125 | 11 | 72062164  | G | T | 1.189  | 0.2346 | +?+?+ | 0     | 1.385 | 2 | 0.5002  |
| rs116951669 | 11 | 72018759  | C | T | 1.188  | 0.2347 | +?+?+ | 0     | 0.707 | 2 | 0.7023  |
| rs117190399 | 11 | 72056023  | T | G | 1.186  | 0.2356 | +?+?+ | 0     | 1.37  | 2 | 0.5041  |
| rs117613362 | 11 | 72051945  | C | A | 1.182  | 0.2373 | +?+?+ | 0     | 1.32  | 2 | 0.5169  |
| rs80045923  | 11 | 72063551  | T | C | 1.18   | 0.2378 | +?+?+ | 0     | 1.387 | 2 | 0.4998  |
| rs590580    | 11 | 118066104 | A | G | 1.178  | 0.2386 | +?+?+ | 0     | 1.209 | 2 | 0.5463  |
| rs149666559 | 11 | 72042565  | A | G | 1.178  | 0.2387 | +?+?+ | 0     | 1.438 | 2 | 0.4873  |
| rs58571741  | 11 | 72065710  | A | C | 1.173  | 0.2408 | +++?+ | 0     | 2.75  | 3 | 0.4317  |
| rs61059752  | 11 | 118246071 | A | C | 1.172  | 0.2411 | ++++- | 0     | 1.216 | 4 | 0.8755  |
| rs151127828 | 11 | 118206121 | A | G | 1.164  | 0.2444 | +?+++ | 0     | 0.119 | 3 | 0.9895  |
| rs489126    | 11 | 118572747 | A | G | 1.144  | 0.2524 | +++-- | 0     | 3.302 | 4 | 0.5086  |
| rs117498960 | 11 | 72065210  | C | T | 1.14   | 0.2544 | +?+?+ | 0     | 1.641 | 2 | 0.4401  |
| rs7933963   | 11 | 118246906 | T | C | 1.136  | 0.2558 | ++++- | 0     | 1.223 | 4 | 0.8743  |
| rs519294    | 11 | 118573743 | A | C | 1.13   | 0.2584 | +++-- | 0     | 3.548 | 4 | 0.4706  |
| rs75040111  | 11 | 118747008 | T | C | -1.127 | 0.2596 | -+??  | -34.8 | 2.966 | 2 | 0.2269  |
| rs657539    | 11 | 118572021 | T | C | 1.126  | 0.2602 | +++-- | 0     | 3.437 | 4 | 0.4876  |
| rs67514601  | 11 | 118189477 | G | A | -1.123 | 0.2614 | -?--- | 0     | 0.71  | 3 | 0.8709  |

|             |    |           |   |   |        |        |      |       |       |   |         |
|-------------|----|-----------|---|---|--------|--------|------|-------|-------|---|---------|
| rs7123811   | 11 | 118569469 | G | T | 1.123  | 0.2616 | +++  | 0     | 3.435 | 4 | 0.4878  |
| rs118105218 | 11 | 72077497  | G | T | 1.119  | 0.263  | +?+? | 0     | 1.504 | 2 | 0.4714  |
| rs11216856  | 11 | 118227838 | T | C | -1.119 | 0.2633 | +++  | 0.4   | 6.026 | 4 | 0.1972  |
| rs611217    | 11 | 118572611 | T | C | 1.118  | 0.2634 | +++  | 0     | 3.627 | 4 | 0.4588  |
| rs517445    | 11 | 118573535 | G | A | 1.114  | 0.2654 | +++  | 0     | 3.437 | 4 | 0.4876  |
| rs611733    | 11 | 118572760 | T | C | 1.103  | 0.2699 | +++  | 0     | 3.418 | 4 | 0.4905  |
| rs117652953 | 11 | 72084357  | G | A | 1.103  | 0.2701 | +?+? | 0     | 1.527 | 2 | 0.4661  |
| rs2276417   | 11 | 118230223 | G | T | -1.1   | 0.2712 | +++  | -1.5  | 5.911 | 4 | 0.2059  |
| rs656287    | 11 | 118571790 | G | A | 1.1    | 0.2714 | +++  | 0     | 3.502 | 4 | 0.4777  |
| rs544452    | 11 | 118571357 | T | G | 1.097  | 0.2725 | +++  | 0     | 3.622 | 4 | 0.4596  |
| rs9666462   | 11 | 118275997 | A | G | 1.097  | 0.2726 | +++  | 0     | 1.033 | 4 | 0.9047  |
| rs657769    | 11 | 118571316 | T | C | 1.097  | 0.2727 | +++  | 0     | 3.614 | 4 | 0.4608  |
| rs673547    | 11 | 118573339 | A | G | 1.095  | 0.2736 | +++  | 0     | 3.466 | 4 | 0.4831  |
| rs574383    | 11 | 118573668 | C | T | 1.094  | 0.2738 | +++  | 0     | 3.4   | 4 | 0.4932  |
| rs647099    | 11 | 118067009 | A | G | 1.094  | 0.274  | +?+? | 0     | 0.978 | 2 | 0.6133  |
| rs488141    | 11 | 118571168 | G | A | 1.092  | 0.2746 | +++  | 0     | 3.642 | 4 | 0.4566  |
| rs658676    | 11 | 118571123 | T | C | 1.092  | 0.2746 | +++  | 0     | 3.642 | 4 | 0.4566  |
| rs541631    | 11 | 118571023 | G | A | 1.092  | 0.2747 | +++  | 0     | 3.643 | 4 | 0.4565  |
| rs659564    | 11 | 118570914 | A | C | 1.092  | 0.2747 | +++  | 0     | 3.643 | 4 | 0.4565  |
| rs7108144   | 11 | 118569694 | A | G | 1.091  | 0.2752 | +++  | 0     | 3.628 | 4 | 0.4587  |
| rs642224    | 11 | 118570919 | A | G | 1.091  | 0.2754 | +++  | 0     | 3.643 | 4 | 0.4565  |
| rs552079    | 11 | 118573022 | C | T | 1.09   | 0.2755 | +++  | 0     | 3.469 | 4 | 0.4826  |
| rs523793    | 11 | 118570697 | T | C | 1.089  | 0.276  | +++  | 0     | 3.639 | 4 | 0.4571  |
| rs554456    | 11 | 118570062 | C | T | 1.089  | 0.276  | +++  | 0     | 3.639 | 4 | 0.457   |
| rs73613980  | 11 | 118284650 | T | C | 1.089  | 0.276  | +++  | 0     | 1.06  | 4 | 0.9006  |
| rs9735317   | 11 | 118725383 | T | C | -1.089 | 0.2762 | -?+- | 6.2   | 5.333 | 3 | 0.149   |
| rs12793594  | 11 | 118569900 | C | T | 1.088  | 0.2764 | +++  | 0     | 3.645 | 4 | 0.4561  |
| rs482889    | 11 | 118570098 | T | G | 1.089  | 0.2764 | +++  | 0     | 3.645 | 4 | 0.4562  |
| rs570949    | 11 | 118571911 | T | G | 1.086  | 0.2776 | +++  | 0     | 3.615 | 4 | 0.4606  |
| rs9666463   | 11 | 118276116 | G | C | 1.084  | 0.2783 | +++  | 0     | 1.004 | 4 | 0.9092  |
| rs11216920  | 11 | 118462554 | G | A | 1.084  | 0.2784 | -++  | 0     | 1.662 | 4 | 0.7976  |
| rs7479114   | 11 | 118568813 | T | C | 1.084  | 0.2784 | +++  | 0     | 3.404 | 4 | 0.4926  |
| rs477106    | 11 | 118363424 | A | C | 1.082  | 0.2793 | +++  | 0     | 0.735 | 4 | 0.9469  |
| rs4486664   | 11 | 118569067 | C | A | 1.081  | 0.2797 | +++  | 0     | 3.121 | 4 | 0.5377  |
| rs648947    | 11 | 118067426 | A | G | 1.081  | 0.2797 | +?+? | 0     | 0.993 | 2 | 0.6086  |
| rs619250    | 11 | 118064582 | A | T | 1.081  | 0.2798 | +?+? | 0     | 0.772 | 2 | 0.6798  |
| rs7483081   | 11 | 118276246 | C | T | 1.08   | 0.2802 | +++  | 0     | 0.998 | 4 | 0.9102  |
| rs2071381   | 11 | 118214267 | A | G | -1.079 | 0.2807 | +++  | -16.7 | 5.14  | 4 | 0.2732  |
| rs1790192   | 11 | 118757191 | G | A | -1.076 | 0.2817 | --   | 32.1  | 8.84  | 4 | 0.06523 |
| rs1613643   | 11 | 118068521 | T | G | 1.076  | 0.2819 | +?+? | 0     | 1     | 2 | 0.6064  |
| rs511451    | 11 | 118568639 | T | C | 1.075  | 0.2826 | +++  | 0     | 3.408 | 4 | 0.492   |
| rs17122157  | 11 | 118276492 | A | G | 1.074  | 0.2828 | +++  | 0     | 0.999 | 4 | 0.9099  |
| rs12798851  | 11 | 118135973 | G | T | 1.074  | 0.283  | +?+- | -26.7 | 3.946 | 3 | 0.2674  |
| rs74678032  | 11 | 118812559 | C | T | 1.073  | 0.2833 | +?++ | -13.6 | 4.402 | 3 | 0.2212  |
| rs648682    | 11 | 118066582 | T | C | 1.073  | 0.2835 | +?+? | 0     | 0.96  | 2 | 0.6187  |
| rs117088064 | 11 | 72074257  | T | C | 1.071  | 0.2843 | +?+? | 0     | 1.508 | 2 | 0.4704  |
| rs117162202 | 11 | 72077463  | A | G | 1.07   | 0.2846 | +?+? | 0     | 1.507 | 2 | 0.4708  |
| rs7124127   | 11 | 118006408 | C | T | 1.067  | 0.286  | +-   | 0     | 3.078 | 4 | 0.5448  |
| rs570371    | 11 | 118568472 | G | A | 1.063  | 0.288  | +++  | 0     | 3.498 | 4 | 0.4781  |
| rs71482156  | 11 | 118734516 | T | A | 1.06   | 0.2891 | +?+? | 0     | 0.004 | 1 | 0.9474  |
| rs1791936   | 11 | 72877964  | G | A | -1.057 | 0.2907 | ---- | 0     | 0.295 | 4 | 0.9902  |
| rs4290266   | 11 | 118285995 | A | G | 1.056  | 0.2908 | +++  | 0     | 1.297 | 4 | 0.8619  |
| rs951657    | 11 | 118067621 | A | G | 1.056  | 0.2908 | +?+? | 0     | 1.04  | 2 | 0.5944  |
| rs4393358   | 11 | 118569097 | T | C | 1.053  | 0.2922 | +++  | 0     | 3.342 | 4 | 0.5023  |
| rs647573    | 11 | 118067132 | C | T | 1.05   | 0.2938 | +?+? | 0     | 0.95  | 2 | 0.6218  |
| rs658040    | 11 | 118572171 | G | A | 1.045  | 0.2961 | +++  | 0     | 3.893 | 4 | 0.4207  |

|             |    |           |   |   |        |        |        |       |        |   |         |
|-------------|----|-----------|---|---|--------|--------|--------|-------|--------|---|---------|
| rs150193966 | 11 | 72071662  | A | G | 1.042  | 0.2974 | ++?++  | 0     | 1.412  | 2 | 0.4937  |
| rs605908    | 11 | 118067192 | C | A | 1.042  | 0.2976 | ++?++  | 0     | 0.879  | 2 | 0.6444  |
| rs7106851   | 11 | 118554259 | A | G | 1.041  | 0.2978 | +++ ++ | 0     | 3.27   | 4 | 0.5137  |
| rs11216859  | 11 | 118238119 | C | T | -1.04  | 0.2984 | +++ -- | -19   | 5.042  | 4 | 0.283   |
| rs12225399  | 11 | 118480285 | C | G | 1.038  | 0.2993 | +++-+  | 0     | 1.241  | 3 | 0.7431  |
| rs7108613   | 11 | 118268613 | G | A | 1.036  | 0.3004 | +++ ++ | 0     | 0.876  | 4 | 0.928   |
| rs111656195 | 11 | 118301375 | A | G | 1.035  | 0.3008 | ++-+-  | -42   | 3.522  | 3 | 0.318   |
| rs647975    | 11 | 118038741 | T | C | 1.031  | 0.3024 | ++-?+  | 0     | 1.57   | 2 | 0.4562  |
| rs10790241  | 11 | 118013034 | A | G | -1.025 | 0.3054 | -?---- | 0     | 0.553  | 3 | 0.9071  |
| rs111903103 | 11 | 118308499 | T | C | 1.017  | 0.3092 | +++-+  | -44   | 3.472  | 3 | 0.3244  |
| rs12276533  | 11 | 118724116 | A | G | -1.016 | 0.3095 | -?+--  | 5.5   | 5.293  | 3 | 0.1515  |
| rs11216949  | 11 | 118568668 | T | C | 1.016  | 0.3096 | +++ ++ | 0     | 3.478  | 4 | 0.4813  |
| rs17122170  | 11 | 118296668 | C | G | 1.011  | 0.3119 | +++ ++ | 0     | 1.609  | 4 | 0.8071  |
| rs56785719  | 11 | 118176623 | G | C | -1.011 | 0.312  | -?-?+  | -86.1 | 2.15   | 2 | 0.3414  |
| rs341048    | 11 | 72298280  | T | C | -1.011 | 0.3122 | ++-?-  | -58.9 | 2.517  | 2 | 0.2841  |
| rs4331144   | 11 | 118554100 | G | A | 1.007  | 0.314  | +++ +- | 0     | 3.417  | 4 | 0.4906  |
| rs581063    | 11 | 118767077 | C | T | -1.005 | 0.315  | --+-   | 0     | 0.569  | 4 | 0.9664  |
| rs7106652   | 11 | 118554248 | T | C | 1.005  | 0.315  | +++ +- | 0     | 3.353  | 4 | 0.5005  |
| rs577217    | 11 | 72489023  | G | A | -1.004 | 0.3153 | --- ++ | 40.3  | 10.045 | 4 | 0.03968 |
| rs1599809   | 11 | 118179200 | A | G | -1.002 | 0.3165 | -?-?+  | 0     | 1.752  | 2 | 0.4165  |
| rs141752759 | 11 | 118194647 | G | C | 1.001  | 0.3168 | ++ +++ | 0     | 0.254  | 3 | 0.9684  |
| rs7119568   | 11 | 118723753 | A | T | -0.998 | 0.3182 | -?+--  | 4.8   | 5.251  | 3 | 0.1543  |
| rs7924647   | 11 | 118728479 | G | A | -0.995 | 0.3196 | -?+--  | 4.1   | 5.211  | 3 | 0.157   |
| rs481903    | 11 | 118567733 | C | T | 0.994  | 0.3201 | +++ ++ | 0     | 3.167  | 4 | 0.5304  |
| rs3212264   | 11 | 118216234 | A | C | 0.994  | 0.3202 | +++ +- | 0     | 2.917  | 4 | 0.5719  |
| rs11602869  | 11 | 118554448 | A | G | 0.992  | 0.3212 | +++ +- | 0     | 3.365  | 4 | 0.4987  |
| rs592280    | 11 | 118553218 | C | T | 0.991  | 0.3215 | +++ +- | 0     | 3.053  | 4 | 0.5489  |
| rs673770    | 11 | 118550601 | G | T | 0.991  | 0.3217 | +++ +- | 0     | 3.184  | 4 | 0.5275  |
| rs7110984   | 11 | 118442234 | A | G | 0.982  | 0.3262 | +-++?  | 0     | 2.024  | 3 | 0.5674  |
| rs642497    | 11 | 118550784 | A | C | 0.98   | 0.3272 | +++ +- | 0     | 3.169  | 4 | 0.5299  |
| rs3782042   | 11 | 118185919 | A | G | -0.976 | 0.3291 | -?-?+  | 22.4  | 5.155  | 2 | 0.07598 |
| rs11605069  | 11 | 118554436 | G | T | 0.973  | 0.3306 | +++ +- | 0     | 3.289  | 4 | 0.5107  |
| rs4544037   | 11 | 118222062 | C | T | 0.972  | 0.3308 | +++ +- | 0     | 2.967  | 4 | 0.5633  |
| rs12799314  | 11 | 118551597 | A | G | 0.972  | 0.3311 | +++ +- | 0     | 3.215  | 4 | 0.5224  |
| rs11217083  | 11 | 118770321 | G | A | -0.972 | 0.3312 | --+-   | 0     | 0.644  | 4 | 0.9581  |
| rs644867    | 11 | 118567545 | G | A | 0.971  | 0.3314 | +++ ++ | 0     | 3.433  | 4 | 0.4882  |
| rs3132893   | 11 | 118303822 | A | C | 0.971  | 0.3316 | +++ ++ | 0     | 1.95   | 4 | 0.745   |
| rs4936433   | 11 | 118552420 | G | A | 0.97   | 0.332  | +++ +- | 0     | 3.179  | 4 | 0.5284  |
| rs642530    | 11 | 118550756 | C | T | 0.968  | 0.3331 | +++ +- | 0     | 3.208  | 4 | 0.5237  |
| rs67307131  | 11 | 118480223 | C | T | 0.968  | 0.3332 | +++-+  | 0     | 1.392  | 3 | 0.7075  |
| rs113488707 | 11 | 118045876 | T | C | 0.966  | 0.334  | ++?+-  | -80.8 | 2.213  | 2 | 0.3308  |
| rs549370    | 11 | 118552842 | A | C | 0.96   | 0.3371 | +++ +- | 0     | 3.239  | 4 | 0.5187  |
| rs2368238   | 11 | 118091761 | G | T | -0.959 | 0.3374 | -?+?-  | 0     | 0.761  | 2 | 0.6834  |
| rs667982    | 11 | 118562767 | C | T | 0.959  | 0.3375 | +++ +- | 0     | 3.128  | 4 | 0.5366  |
| rs12796373  | 11 | 118554939 | A | G | 0.958  | 0.338  | +++ +- | 0     | 3.303  | 4 | 0.5084  |
| rs654792    | 11 | 118552996 | T | G | 0.957  | 0.3386 | +++ +- | 0     | 3.257  | 4 | 0.5157  |
| rs45444192  | 11 | 118208083 | A | G | 0.956  | 0.3389 | +++-?  | -43.7 | 2.785  | 2 | 0.2485  |
| rs519848    | 11 | 118552715 | A | G | 0.954  | 0.3399 | +++ +- | 0     | 3.273  | 4 | 0.5132  |
| rs1945765   | 11 | 118182829 | A | T | -0.953 | 0.3405 | -?-?+  | 0     | 1.926  | 2 | 0.3818  |
| rs11217081  | 11 | 118769032 | G | A | -0.95  | 0.3421 | --+-   | 0     | 0.607  | 4 | 0.9623  |
| rs112550735 | 11 | 118303200 | C | T | 0.949  | 0.3425 | ++-+-  | -42.5 | 3.508  | 3 | 0.3197  |
| rs77728961  | 11 | 118303182 | C | T | 0.949  | 0.3427 | ++-+-  | -42.5 | 3.509  | 3 | 0.3196  |
| rs4456279   | 11 | 72520003  | A | G | -0.946 | 0.344  | --- ++ | 38.1  | 9.695  | 4 | 0.04588 |
| rs76930336  | 11 | 118464764 | A | C | 0.946  | 0.3442 | +-++?  | 0     | 2.521  | 3 | 0.4715  |
| rs2051480   | 11 | 118094513 | G | A | -0.944 | 0.345  | -?+?-  | 0     | 0.779  | 2 | 0.6773  |
| rs4938524   | 11 | 118552074 | T | G | 0.944  | 0.3451 | +++ +- | 0     | 3.23   | 4 | 0.5202  |

|            |    |           |   |   |        |        |      |       |       |   |        |
|------------|----|-----------|---|---|--------|--------|------|-------|-------|---|--------|
| rs644498   | 11 | 118567486 | C | T | 0.943  | 0.3458 | +++  | 0     | 3.309 | 4 | 0.5076 |
| rs563549   | 11 | 118558953 | A | G | 0.94   | 0.3474 | +++  | 0     | 3.271 | 4 | 0.5135 |
| rs600969   | 11 | 118545797 | T | C | 0.94   | 0.3474 | +++  | 0     | 3.186 | 4 | 0.5273 |
| rs509641   | 11 | 118558952 | C | T | 0.939  | 0.3475 | +++  | 0     | 3.273 | 4 | 0.5133 |
| rs45489394 | 11 | 118228968 | G | C | 0.939  | 0.3476 | +++  | 0     | 2.908 | 4 | 0.5733 |
| rs6589674  | 11 | 118566039 | G | A | 0.939  | 0.348  | +++  | 0     | 2.881 | 4 | 0.5779 |
| rs57495164 | 11 | 118095148 | C | T | -0.938 | 0.3481 | -?+? | 0     | 0.776 | 2 | 0.6784 |
| rs656575   | 11 | 118549908 | G | T | 0.937  | 0.3488 | +++  | 0     | 3.072 | 4 | 0.5458 |
| rs543413   | 11 | 118550017 | C | T | 0.937  | 0.349  | +++  | 0     | 3.068 | 4 | 0.5465 |
| rs507080   | 11 | 118549582 | A | G | 0.936  | 0.3493 | +++  | 0     | 3.046 | 4 | 0.5501 |
| rs59405103 | 11 | 118262305 | C | A | 0.935  | 0.3497 | +++  | 0     | 0.702 | 4 | 0.9511 |
| rs11216845 | 11 | 118163216 | T | C | -0.935 | 0.35   | -?-? | 0     | 1.367 | 2 | 0.5048 |
| rs562313   | 11 | 118548421 | A | G | 0.931  | 0.3519 | +++  | 0     | 3.238 | 4 | 0.5189 |
| rs510408   | 11 | 118558901 | C | G | 0.931  | 0.352  | +++  | 0     | 3.251 | 4 | 0.5168 |
| rs12277355 | 11 | 118729442 | T | C | -0.93  | 0.3522 | +++  | -0.2  | 5.988 | 4 | 0.2    |
| rs12794726 | 11 | 118566313 | T | C | 0.93   | 0.3526 | +++  | 0     | 3.06  | 4 | 0.5478 |
| rs543327   | 11 | 118549985 | T | G | 0.929  | 0.3527 | +++  | 0     | 3.1   | 4 | 0.5412 |
| rs638805   | 11 | 118558889 | T | G | 0.929  | 0.3531 | +++  | 0     | 3.265 | 4 | 0.5146 |
| rs1540191  | 11 | 118090432 | A | G | -0.928 | 0.3532 | -?+? | 0     | 0.89  | 2 | 0.6407 |
| rs7130076  | 11 | 118566090 | C | T | 0.927  | 0.3541 | +++  | 0     | 3.051 | 4 | 0.5493 |
| rs7122510  | 11 | 118708785 | A | C | -0.926 | 0.3543 | -?+? | -0.3  | 4.985 | 3 | 0.1729 |
| rs514143   | 11 | 118558449 | A | G | 0.924  | 0.3554 | +++  | 0     | 2.972 | 4 | 0.5625 |
| rs478296   | 11 | 118567375 | C | T | 0.924  | 0.3556 | +++  | 0     | 3.471 | 4 | 0.4823 |
| rs542613   | 11 | 118567084 | A | G | 0.923  | 0.3561 | +++  | 0     | 3.136 | 4 | 0.5353 |
| rs7126172  | 11 | 118567257 | G | A | 0.922  | 0.3566 | +++  | 0     | 3.273 | 4 | 0.5133 |
| rs11216826 | 11 | 118099713 | T | A | -0.922 | 0.3567 | -?+? | 0     | 0.764 | 2 | 0.6825 |
| rs7122511  | 11 | 118708786 | A | C | -0.921 | 0.3569 | -?+? | 0     | 4.998 | 3 | 0.1719 |
| rs11216844 | 11 | 118162796 | G | A | -0.921 | 0.3571 | -?-? | 0     | 1.36  | 2 | 0.5066 |
| rs11216825 | 11 | 118099617 | A | G | -0.92  | 0.3574 | -?+? | 0     | 0.767 | 2 | 0.6814 |
| rs659969   | 11 | 118549803 | T | C | 0.916  | 0.3594 | +++  | 0     | 3.154 | 4 | 0.5324 |
| rs493834   | 11 | 118567444 | G | A | 0.916  | 0.3595 | +++  | 0     | 3.209 | 4 | 0.5235 |
| rs11216819 | 11 | 118084980 | G | A | 0.916  | 0.3599 | ++-? | 0     | 1.873 | 2 | 0.3921 |
| rs7114458  | 11 | 118566175 | A | G | 0.915  | 0.36   | +++  | 0     | 3.127 | 4 | 0.5367 |
| rs869638   | 11 | 118100411 | C | G | -0.915 | 0.3601 | -?+? | 0     | 0.764 | 2 | 0.6825 |
| rs10892226 | 11 | 118096618 | A | G | -0.915 | 0.3602 | -?+? | 0     | 0.715 | 2 | 0.6995 |
| rs625513   | 11 | 118555719 | C | A | 0.914  | 0.3608 | +++  | 0     | 2.966 | 4 | 0.5635 |
| rs60514290 | 11 | 118246048 | C | G | 0.911  | 0.3623 | +++  | 0     | 0.737 | 4 | 0.9467 |
| rs7125115  | 11 | 118478330 | A | G | 0.911  | 0.3624 | +++  | 0     | 1.297 | 4 | 0.8619 |
| rs525485   | 11 | 118555754 | A | G | 0.909  | 0.3633 | +++  | 0     | 2.991 | 4 | 0.5594 |
| rs45501598 | 11 | 118251980 | T | A | 0.908  | 0.364  | +++  | 0     | 0.831 | 4 | 0.9343 |
| rs558781   | 11 | 118564397 | T | G | 0.908  | 0.364  | +++  | 0     | 2.894 | 4 | 0.5757 |
| rs610664   | 11 | 118556691 | G | A | 0.907  | 0.3641 | +++  | 0     | 3.274 | 4 | 0.5131 |
| rs76126708 | 11 | 118259379 | C | A | 0.907  | 0.3645 | +++  | 0     | 0.785 | 4 | 0.9404 |
| rs7114216  | 11 | 118566234 | G | A | 0.907  | 0.3646 | +++  | 0     | 3.18  | 4 | 0.5281 |
| rs638301   | 11 | 118559003 | G | A | 0.904  | 0.3659 | +++  | 0     | 3.122 | 4 | 0.5376 |
| rs3782040  | 11 | 118176097 | G | A | -0.904 | 0.3661 | -?-? | -75.9 | 2.274 | 2 | 0.3208 |
| rs642662   | 11 | 118567020 | G | A | 0.904  | 0.3661 | +++  | 0     | 3.13  | 4 | 0.5363 |
| rs555356   | 11 | 118558078 | T | G | 0.901  | 0.3674 | +++  | 0     | 3.056 | 4 | 0.5485 |
| rs11607355 | 11 | 118093547 | T | C | -0.901 | 0.3678 | -?+? | 0     | 0.803 | 2 | 0.6692 |
| rs1784298  | 11 | 118548665 | C | T | 0.9    | 0.368  | +++  | 0     | 3.025 | 4 | 0.5537 |
| rs561845   | 11 | 118558827 | G | A | 0.9    | 0.3681 | +++  | 0     | 3.229 | 4 | 0.5202 |
| rs4938522  | 11 | 118548671 | T | A | 0.899  | 0.3685 | +++  | 0     | 3.03  | 4 | 0.5528 |
| rs571751   | 11 | 118556797 | C | A | 0.896  | 0.3701 | +++  | 0     | 3.223 | 4 | 0.5212 |
| rs533144   | 11 | 118559247 | A | C | 0.894  | 0.3715 | +++  | 0     | 3.18  | 4 | 0.5281 |
| rs486462   | 11 | 118559178 | C | T | 0.893  | 0.3716 | +++  | 0     | 3.158 | 4 | 0.5317 |
| rs508579   | 11 | 118559084 | C | G | 0.892  | 0.3722 | +++  | 0     | 3.109 | 4 | 0.5397 |

|             |    |           |   |   |        |        |       |        |        |   |         |
|-------------|----|-----------|---|---|--------|--------|-------|--------|--------|---|---------|
| rs693306    | 11 | 118558333 | G | A | 0.891  | 0.373  | +++-- | 0      | 3.126  | 4 | 0.5369  |
| rs11216947  | 11 | 118567218 | A | G | 0.889  | 0.3738 | +++-- | 0      | 3.286  | 4 | 0.5111  |
| rs57702967  | 11 | 118261736 | A | C | 0.889  | 0.3738 | +++-- | 0      | 0.724  | 4 | 0.9484  |
| rs12798453  | 11 | 118561410 | G | T | 0.889  | 0.374  | +++-- | 0      | 2.991  | 4 | 0.5594  |
| rs533646    | 11 | 118566746 | G | C | 0.889  | 0.374  | +++-- | 0      | 3.155  | 4 | 0.5323  |
| rs625918    | 11 | 118559542 | T | C | 0.888  | 0.3743 | +++-- | 0      | 3.163  | 4 | 0.5309  |
| rs558593    | 11 | 118562520 | T | C | 0.886  | 0.3755 | +++-- | 0      | 3.101  | 4 | 0.541   |
| rs7926970   | 11 | 118559881 | G | T | 0.886  | 0.3759 | +++-- | 0      | 3.152  | 4 | 0.5327  |
| rs502601    | 11 | 118565679 | A | G | 0.884  | 0.3767 | +++-- | 0      | 3.162  | 4 | 0.5311  |
| rs558907    | 11 | 118558455 | G | A | 0.884  | 0.3767 | +++-- | 0      | 3.179  | 4 | 0.5283  |
| rs3741315   | 11 | 118004688 | A | G | 0.884  | 0.3768 | +++-- | 0      | 2.382  | 4 | 0.6658  |
| rs4938523   | 11 | 118548838 | T | G | 0.884  | 0.3769 | +++-- | 0      | 3.117  | 4 | 0.5385  |
| rs7949539   | 11 | 118250586 | G | A | 0.881  | 0.3782 | +++-- | 0      | 0.807  | 4 | 0.9376  |
| rs4938500   | 11 | 118166212 | A | C | -0.881 | 0.3783 | -?+?  | 0      | 1.317  | 2 | 0.5177  |
| rs112152942 | 11 | 118240840 | G | C | 0.88   | 0.3789 | +?+?  | -37.4  | 3.638  | 3 | 0.3032  |
| rs7926959   | 11 | 118559866 | C | T | 0.878  | 0.38   | +++-- | 0      | 3.116  | 4 | 0.5385  |
| rs1318166   | 11 | 118171058 | G | A | -0.877 | 0.3804 | -?+?  | -93.8  | 2.064  | 2 | 0.3562  |
| rs111354396 | 11 | 118296184 | A | G | 0.875  | 0.3814 | +?+?  | -65.7  | 3.018  | 3 | 0.3889  |
| rs585039    | 11 | 118563381 | A | C | 0.875  | 0.3816 | +++-- | 0      | 3.066  | 4 | 0.5469  |
| rs59138930  | 11 | 118173783 | T | C | -0.875 | 0.3817 | -?+?  | -82.7  | 2.189  | 2 | 0.3347  |
| rs45468196  | 11 | 118242889 | A | G | 0.874  | 0.382  | +?+?  | -37.4  | 3.639  | 3 | 0.3031  |
| rs518028    | 11 | 118564982 | C | T | 0.874  | 0.3821 | +++-- | 0      | 3.087  | 4 | 0.5434  |
| rs582630    | 11 | 118562799 | A | C | 0.873  | 0.3824 | +++-- | 0      | 3.075  | 4 | 0.5454  |
| rs12576486  | 11 | 118235490 | C | T | 0.873  | 0.3829 | +++-- | 0      | 2.573  | 4 | 0.6317  |
| rs516153    | 11 | 118564762 | A | C | 0.871  | 0.3835 | +++-- | 0      | 3.094  | 4 | 0.5422  |
| rs471227    | 11 | 118564601 | C | T | 0.871  | 0.3839 | +++-- | 0      | 3.091  | 4 | 0.5428  |
| rs11216861  | 11 | 118241516 | A | G | -0.87  | 0.3841 | +++-- | -49.1  | 4.024  | 4 | 0.4028  |
| rs693037    | 11 | 118553326 | T | C | 0.87   | 0.3842 | +++-- | 0      | 3.165  | 4 | 0.5306  |
| rs508640    | 11 | 118564413 | G | A | 0.87   | 0.3843 | +++-- | 0      | 3.096  | 4 | 0.542   |
| rs78755429  | 11 | 118777978 | A | C | 0.869  | 0.3846 | +?+?  | 0      | 1.796  | 3 | 0.6158  |
| rs4938529   | 11 | 118560569 | T | C | 0.869  | 0.3849 | +++-- | 0      | 3.104  | 4 | 0.5405  |
| rs45555733  | 11 | 118237566 | G | C | 0.867  | 0.3858 | +?+?  | -35.1  | 3.701  | 3 | 0.2957  |
| rs613377    | 11 | 118556084 | T | C | 0.867  | 0.3859 | +++-- | 0      | 3.198  | 4 | 0.5252  |
| rs11216827  | 11 | 118110202 | T | A | -0.867 | 0.3861 | -?+?  | 0      | 0.621  | 2 | 0.733   |
| rs546890    | 11 | 118557198 | C | T | 0.867  | 0.3862 | +++-- | 0      | 3.057  | 4 | 0.5483  |
| rs478371    | 11 | 118565336 | A | G | 0.865  | 0.3868 | +++-- | 0      | 3.082  | 4 | 0.5442  |
| rs519982    | 11 | 118565231 | T | C | 0.866  | 0.3868 | +++-- | 0      | 3.129  | 4 | 0.5364  |
| rs61894194  | 11 | 72513028  | T | C | -0.863 | 0.3881 | +++-- | 38.8   | 9.808  | 4 | 0.04379 |
| rs12362596  | 11 | 118105473 | C | G | -0.861 | 0.3892 | -?+?  | 0      | 0.498  | 2 | 0.7794  |
| rs562780    | 11 | 118362414 | T | C | 0.859  | 0.3904 | +++-- | 0      | 2.054  | 4 | 0.7258  |
| rs12419365  | 11 | 118112332 | A | C | 0.85   | 0.3953 | +?+?  | 0      | 2.094  | 3 | 0.5531  |
| rs146305387 | 11 | 118426800 | T | C | -0.849 | 0.3957 | -?+?  | -177.2 | 1.082  | 1 | 0.2982  |
| rs112646740 | 11 | 118247805 | A | T | 0.848  | 0.3962 | +?+?  | -41.7  | 3.529  | 3 | 0.317   |
| rs74398561  | 11 | 118233634 | G | A | 0.847  | 0.3968 | +?+?  | -29.1  | 3.872  | 3 | 0.2757  |
| rs1783935   | 11 | 118539566 | T | A | 0.847  | 0.397  | +++-- | 0      | 3.001  | 4 | 0.5577  |
| rs947848    | 11 | 72895007  | T | A | -0.846 | 0.3976 | +++-- | 1.4    | 6.085  | 4 | 0.1929  |
| rs111430146 | 11 | 118248374 | A | C | 0.845  | 0.398  | +?+?  | -43    | 3.496  | 3 | 0.3213  |
| rs12577061  | 11 | 118121553 | C | G | -0.845 | 0.3984 | -?+?  | 0      | 0.835  | 2 | 0.6586  |
| rs653008    | 11 | 118520480 | T | G | 0.841  | 0.4004 | +++-- | 0      | 1.742  | 4 | 0.7831  |
| rs1573559   | 11 | 118104627 | A | G | -0.84  | 0.4008 | -?+?  | 0      | 0.554  | 2 | 0.7581  |
| rs607527    | 11 | 118538187 | T | G | 0.84   | 0.401  | +++-- | 0      | 3.061  | 4 | 0.5476  |
| rs112563022 | 11 | 118262135 | T | C | 0.839  | 0.4016 | +?+?  | -50.2  | 3.329  | 3 | 0.3436  |
| rs58508419  | 11 | 118762102 | A | G | 0.838  | 0.402  | +?+?  | 0      | 1.076  | 2 | 0.584   |
| rs630923    | 11 | 118754353 | A | C | -0.833 | 0.4047 | +++-- | 43     | 10.522 | 4 | 0.0325  |
| rs2368242   | 11 | 118115526 | C | T | -0.833 | 0.4049 | -?+?  | 0      | 0.828  | 2 | 0.6611  |
| rs601318    | 11 | 118519550 | G | C | 0.832  | 0.4052 | +++-- | 0      | 1.68   | 4 | 0.7944  |

|             |    |           |   |   |        |        |       |       |        |   |         |
|-------------|----|-----------|---|---|--------|--------|-------|-------|--------|---|---------|
| rs3825051   | 11 | 118174629 | G | A | -0.831 | 0.4058 | -?-?+ | -72.9 | 2.313  | 2 | 0.3145  |
| rs56356019  | 11 | 118114893 | G | A | -0.829 | 0.407  | -?+?- | 0     | 0.765  | 2 | 0.682   |
| rs10793054  | 11 | 72662812  | A | C | 0.828  | 0.4077 | --++  | 48.8  | 11.716 | 4 | 0.01959 |
| rs17092740  | 11 | 118117614 | A | G | -0.828 | 0.4077 | -?+?- | 0     | 0.789  | 2 | 0.674   |
| rs112243842 | 11 | 118246021 | G | T | 0.828  | 0.4079 | +?-+- | -38.6 | 3.607  | 3 | 0.3071  |
| rs11235597  | 11 | 72516773  | A | G | -0.828 | 0.4079 | +++-  | 39.2  | 9.867  | 4 | 0.04274 |
| rs12364013  | 11 | 118119575 | T | C | -0.825 | 0.4091 | -?+?- | 0     | 0.843  | 2 | 0.6559  |
| rs55942271  | 11 | 118177115 | T | C | -0.825 | 0.4092 | ---?+ | 0     | 1.541  | 3 | 0.6728  |
| rs12577053  | 11 | 118121421 | A | G | -0.823 | 0.4105 | -?+?- | 0     | 0.892  | 2 | 0.6403  |
| rs692750    | 11 | 118538308 | T | G | 0.822  | 0.4111 | +++-  | 0     | 3.072  | 4 | 0.5459  |
| rs45457998  | 11 | 118492713 | G | A | 0.821  | 0.4116 | +?-++ | -50.7 | 3.318  | 3 | 0.3451  |
| rs73024604  | 11 | 118120351 | T | C | -0.819 | 0.4128 | -?+?- | 0     | 0.85   | 2 | 0.6538  |
| rs45443099  | 11 | 118254710 | G | A | 0.817  | 0.4139 | +?-+- | -47   | 3.402  | 3 | 0.3337  |
| rs61900882  | 11 | 118130199 | C | T | -0.817 | 0.414  | -?+?- | 0     | 1.046  | 2 | 0.5926  |
| rs73024606  | 11 | 118120366 | C | G | -0.816 | 0.4143 | -?+?- | 0     | 0.857  | 2 | 0.6515  |
| rs7108905   | 11 | 118712427 | G | C | -0.816 | 0.4145 | -?+-- | 6.5   | 5.346  | 3 | 0.1481  |
| rs61900655  | 11 | 118120802 | C | G | -0.815 | 0.4148 | -?+?- | 0     | 0.859  | 2 | 0.6508  |
| rs61900957  | 11 | 118501723 | T | C | 0.815  | 0.4151 | +?-++ | 23.3  | 6.517  | 3 | 0.08898 |
| rs56315433  | 11 | 118114576 | A | C | -0.815 | 0.4154 | -?+?- | 0     | 0.765  | 2 | 0.6823  |
| rs111792147 | 11 | 118259162 | A | G | 0.814  | 0.4156 | +?-+- | -47   | 3.402  | 3 | 0.3337  |
| rs649138    | 11 | 118066695 | C | T | 0.813  | 0.4164 | ++?++ | 0     | 0.484  | 2 | 0.7851  |
| rs4589335   | 11 | 118539140 | T | C | 0.806  | 0.4203 | +++-  | 0     | 3.138  | 4 | 0.535   |
| rs12286723  | 11 | 118734640 | T | C | -0.803 | 0.4218 | -?+-- | 11.9  | 5.678  | 3 | 0.1284  |
| rs112302730 | 11 | 118283383 | A | G | 0.798  | 0.4246 | +?-+- | 0     | 2.836  | 3 | 0.4177  |
| rs12272981  | 11 | 118709600 | G | A | -0.797 | 0.4252 | -?+-- | 4.8   | 5.251  | 3 | 0.1543  |
| rs4457789   | 11 | 118539170 | T | G | 0.797  | 0.4253 | +++-  | 0     | 2.691  | 4 | 0.6107  |
| rs111763202 | 11 | 118289734 | T | C | 0.796  | 0.4261 | +?-+- | 0     | 2.763  | 3 | 0.4295  |
| rs112035668 | 11 | 118290443 | G | A | 0.795  | 0.4265 | +?-+- | 0     | 2.765  | 3 | 0.4293  |
| rs1715456   | 11 | 118123517 | G | A | -0.792 | 0.4284 | -?+?- | 0     | 1.069  | 2 | 0.5858  |
| rs113941645 | 11 | 118545589 | G | C | 0.791  | 0.4292 | +?-++ | 0     | 1.124  | 3 | 0.7712  |
| rs526597    | 11 | 118546602 | G | A | 0.789  | 0.4303 | +++-  | 0     | 2.892  | 4 | 0.576   |
| rs111993696 | 11 | 118282448 | A | G | 0.788  | 0.4308 | +?-+- | 0     | 2.974  | 3 | 0.3957  |
| rs112245679 | 11 | 118287622 | G | A | 0.787  | 0.4311 | +?-+- | 0     | 2.845  | 3 | 0.4161  |
| rs45496391  | 11 | 118477226 | C | A | 0.782  | 0.4339 | +++-  | 0     | 0.602  | 3 | 0.896   |
| rs76457018  | 11 | 118762701 | A | G | 0.776  | 0.4377 | +---+ | 48.1  | 11.559 | 4 | 0.02095 |
| rs77074463  | 11 | 118748170 | C | G | 0.767  | 0.443  | ++++- | 25.4  | 8.045  | 4 | 0.08996 |
| rs1970750   | 11 | 118149122 | T | C | -0.767 | 0.4434 | -?-?+ | 0     | 1.81   | 2 | 0.4045  |
| rs17121997  | 11 | 118131049 | C | T | -0.764 | 0.445  | -?+?- | 0     | 0.995  | 2 | 0.6082  |
| rs117278652 | 11 | 72093901  | A | C | 0.762  | 0.4461 | -?+?- | -70.4 | 2.347  | 2 | 0.3093  |
| rs7479331   | 11 | 118829521 | T | G | 0.762  | 0.4461 | +++?- | 21.4  | 6.359  | 3 | 0.09539 |
| rs117822540 | 11 | 72123996  | C | T | 0.753  | 0.4514 | -?+?+ | 0     | 1.983  | 2 | 0.371   |
| rs7118009   | 11 | 118707559 | T | C | -0.753 | 0.4516 | -?+-- | -10.3 | 4.532  | 3 | 0.2094  |
| rs1171461   | 11 | 118522179 | A | G | 0.75   | 0.453  | +++-  | 0     | 1.816  | 4 | 0.7695  |
| rs10790248  | 11 | 118125672 | A | G | -0.749 | 0.4539 | -?+?- | 0     | 0.906  | 2 | 0.6357  |
| rs112583389 | 11 | 118278998 | G | T | 0.745  | 0.4561 | +?-+- | -64.9 | 3.033  | 3 | 0.3866  |
| rs520543    | 11 | 118538157 | A | G | 0.741  | 0.4586 | +++-  | 0     | 2.973  | 4 | 0.5623  |
| rs7925466   | 11 | 72778113  | C | A | 0.74   | 0.459  | --++  | 35.6  | 9.321  | 4 | 0.05356 |
| rs3181258   | 11 | 118218478 | A | T | 0.74   | 0.4596 | +?-+- | -27.3 | 3.929  | 3 | 0.2692  |
| rs2071702   | 11 | 118373861 | T | C | 0.738  | 0.4606 | +++-  | 0     | 2.745  | 3 | 0.4326  |
| rs117794131 | 11 | 72097791  | C | T | 0.735  | 0.4621 | -?+?- | -76.8 | 2.263  | 2 | 0.3226  |
| rs4936425   | 11 | 118126904 | T | C | -0.735 | 0.4624 | -?+?- | 0     | 0.972  | 2 | 0.6151  |
| rs2187490   | 11 | 118713180 | G | T | 0.734  | 0.4627 | +?-++ | 0     | 1.623  | 3 | 0.6543  |
| rs1126205   | 11 | 72523794  | T | G | -0.734 | 0.4632 | +++-  | 42.8  | 10.493 | 4 | 0.03289 |
| rs113784020 | 11 | 118559731 | T | C | 0.733  | 0.4633 | +?-++ | 0     | 2.185  | 3 | 0.535   |
| rs527290    | 11 | 118515616 | T | C | 0.73   | 0.4656 | +++-  | 0     | 1.764  | 4 | 0.7791  |
| rs7109466   | 11 | 72114792  | T | C | 0.729  | 0.466  | -?+?+ | -96.7 | 2.033  | 2 | 0.3618  |

|             |    |           |   |   |        |        |       |       |       |   |         |
|-------------|----|-----------|---|---|--------|--------|-------|-------|-------|---|---------|
| rs4938492   | 11 | 118126675 | C | T | -0.729 | 0.4661 | -?+?- | 0     | 0.953 | 2 | 0.6211  |
| rs7939548   | 11 | 118212979 | A | G | 0.725  | 0.4684 | +?-+- | -21.4 | 4.119 | 3 | 0.2489  |
| rs1104542   | 11 | 118129340 | T | C | -0.724 | 0.4691 | -?+?- | 0     | 0.971 | 2 | 0.6155  |
| rs2004235   | 11 | 118008212 | C | T | 0.724  | 0.4691 | +--+  | 0     | 2.109 | 4 | 0.7158  |
| rs111707199 | 11 | 118276810 | G | A | 0.723  | 0.4696 | +?-+- | 0     | 2.974 | 3 | 0.3957  |
| rs3759004   | 11 | 118136836 | T | C | -0.723 | 0.4699 | -?-?+ | -67.3 | 2.391 | 2 | 0.3025  |
| rs17121871  | 11 | 118073344 | T | C | 0.721  | 0.4712 | +?+?+ | 0     | 0.674 | 2 | 0.7138  |
| rs112468256 | 11 | 118278479 | C | T | 0.719  | 0.4723 | +?-+- | 0     | 2.943 | 3 | 0.4005  |
| rs2508991   | 11 | 118539522 | A | G | 0.71   | 0.4778 | +++-  | 0     | 3.127 | 4 | 0.5368  |
| rs117190635 | 11 | 72104119  | A | G | 0.707  | 0.4795 | -?+?- | 0     | 1.901 | 2 | 0.3866  |
| rs12417431  | 11 | 118137383 | G | A | -0.707 | 0.4798 | -?-?+ | -62.6 | 2.46  | 2 | 0.2922  |
| rs73575424  | 11 | 118788517 | A | C | 0.705  | 0.481  | +--+  | 30.2  | 8.593 | 4 | 0.07211 |
| rs117654328 | 11 | 72117713  | A | G | 0.704  | 0.4812 | -?+?+ | 0     | 1.936 | 2 | 0.3798  |
| rs150031150 | 11 | 72120370  | A | G | 0.704  | 0.4812 | -?+?+ | 0     | 1.936 | 2 | 0.3798  |
| rs112970787 | 11 | 118212235 | C | G | 0.704  | 0.4814 | +?-+- | -20.2 | 4.159 | 3 | 0.2448  |
| rs605560    | 11 | 118067187 | C | G | 0.703  | 0.4819 | +?+?+ | 0     | 0.511 | 2 | 0.7745  |
| rs4938615   | 11 | 118865319 | G | C | 0.702  | 0.4826 | +?+?- | -9.1  | 3.667 | 2 | 0.1598  |
| rs1814964   | 11 | 118006957 | C | T | 0.701  | 0.4835 | +--+  | 0     | 2.031 | 4 | 0.7301  |
| rs10793055  | 11 | 72710761  | C | T | 0.698  | 0.485  | --+-  | 38.1  | 9.69  | 4 | 0.04599 |
| rs1790063   | 11 | 72995912  | A | G | 0.698  | 0.4851 | -?-+? | 0     | 1.745 | 2 | 0.418   |
| rs77487830  | 11 | 118311869 | G | A | 0.698  | 0.4854 | +--+  | -45.9 | 4.111 | 4 | 0.3912  |
| rs12792929  | 11 | 118240715 | C | G | 0.697  | 0.486  | +++-- | 0     | 1.27  | 4 | 0.8664  |
| rs117235147 | 11 | 72115430  | A | T | 0.695  | 0.4868 | -?+?+ | 0     | 1.902 | 2 | 0.3864  |
| rs11235595  | 11 | 72512708  | C | G | -0.695 | 0.487  | -++-- | 42.1  | 10.36 | 4 | 0.03479 |
| rs116881498 | 11 | 72102819  | T | C | 0.693  | 0.4881 | -?+?- | 0     | 1.998 | 2 | 0.3682  |
| rs79826955  | 11 | 72104081  | A | G | 0.693  | 0.4884 | -?+?- | 0     | 1.996 | 2 | 0.3686  |
| rs3759001   | 11 | 118135745 | T | C | -0.693 | 0.4886 | +?-?- | 0     | 0.47  | 2 | 0.7906  |
| rs1629083   | 11 | 118126576 | T | C | 0.691  | 0.4894 | -?+?+ | -78.1 | 2.246 | 2 | 0.3253  |
| rs7129048   | 11 | 118211797 | C | T | 0.689  | 0.4906 | +?-+- | -11.3 | 4.493 | 3 | 0.2129  |
| rs77535829  | 11 | 118311677 | T | C | 0.689  | 0.4906 | +--+  | -45.6 | 4.122 | 4 | 0.3898  |
| rs45558732  | 11 | 118402962 | T | G | 0.686  | 0.4929 | +?-++ | 0     | 0.43  | 3 | 0.9341  |
| rs4938520   | 11 | 118522338 | G | A | 0.685  | 0.4933 | +++-  | 0     | 1.559 | 4 | 0.8161  |
| rs3759005   | 11 | 118136871 | G | A | -0.684 | 0.4937 | -?-?+ | 0     | 1.739 | 2 | 0.4193  |
| rs3782041   | 11 | 118184092 | T | C | -0.681 | 0.4957 | ---?+ | 0     | 1.674 | 3 | 0.6426  |
| rs1806      | 11 | 118076004 | C | T | 0.679  | 0.4975 | +?-?+ | 0     | 0.808 | 2 | 0.6677  |
| rs7103001   | 11 | 118367669 | T | A | 0.677  | 0.4982 | +?+-  | 0     | 2.145 | 3 | 0.5429  |
| rs481206    | 11 | 72497462  | T | C | 0.677  | 0.4983 | ++--  | 0     | 3.889 | 4 | 0.4213  |
| rs3759003   | 11 | 118136745 | G | T | -0.677 | 0.4986 | -?-?+ | 0     | 1.737 | 2 | 0.4197  |
| rs45480805  | 11 | 118267903 | A | G | 0.675  | 0.4997 | +?-+- | 0     | 2.958 | 3 | 0.3982  |
| rs11604096  | 11 | 118012441 | C | A | -0.675 | 0.5    | -+--+ | 0     | 1.139 | 4 | 0.8881  |
| rs61900902  | 11 | 118159684 | C | T | -0.672 | 0.5016 | -?-?+ | -96.1 | 2.04  | 2 | 0.3607  |
| rs7110197   | 11 | 118228624 | C | G | 0.672  | 0.5017 | +++-- | 0     | 1.518 | 4 | 0.8234  |
| rs10892253  | 11 | 118559426 | A | C | 0.671  | 0.5024 | +?+-  | 0     | 0.638 | 3 | 0.8876  |
| rs171021    | 11 | 72317557  | T | C | 0.671  | 0.5025 | -?+?+ | 0     | 1.237 | 2 | 0.5388  |
| rs745663    | 11 | 118529595 | G | A | 0.67   | 0.5029 | +++-  | 0     | 1.437 | 4 | 0.8377  |
| rs12795615  | 11 | 118214562 | T | C | 0.67   | 0.5032 | +++-- | 0     | 1.55  | 4 | 0.8178  |
| rs2239695   | 11 | 118213632 | T | C | 0.669  | 0.5034 | +++-- | 0     | 1.693 | 4 | 0.7921  |
| rs35902434  | 11 | 118222634 | C | T | 0.668  | 0.5043 | +++-- | 0     | 1.488 | 4 | 0.8287  |
| rs36061634  | 11 | 118225452 | A | T | 0.667  | 0.5046 | +++-- | 0     | 1.501 | 4 | 0.8264  |
| rs4938507   | 11 | 118231584 | G | A | 0.667  | 0.5047 | +?+-  | -39.7 | 3.58  | 3 | 0.3105  |
| rs3825054   | 11 | 118234191 | A | G | 0.666  | 0.5052 | +++-- | 0     | 1.512 | 4 | 0.8245  |
| rs11216812  | 11 | 118071762 | A | G | 0.665  | 0.5063 | +?-+- | 0     | 1.282 | 3 | 0.7333  |
| rs12290522  | 11 | 118486325 | T | C | 0.665  | 0.5063 | +++-  | 0     | 1.775 | 4 | 0.777   |
| rs3759006   | 11 | 118137560 | A | G | -0.664 | 0.5064 | -?-?+ | 0     | 1.871 | 2 | 0.3924  |
| rs7925928   | 11 | 72748384  | G | A | 0.664  | 0.5064 | --+-  | 36.2  | 9.41  | 4 | 0.05164 |
| rs11216814  | 11 | 118071857 | G | A | 0.664  | 0.5067 | +?-+- | 0     | 1.281 | 3 | 0.7336  |

|             |    |           |   |   |        |        |       |       |        |   |         |
|-------------|----|-----------|---|---|--------|--------|-------|-------|--------|---|---------|
| rs111587825 | 11 | 118274602 | G | T | 0.664  | 0.5068 | +?+?  | 0     | 2.723  | 3 | 0.4364  |
| rs75085081  | 11 | 118801045 | A | G | 0.664  | 0.5068 | +?+?  | 0     | 2.373  | 3 | 0.4986  |
| rs4943939   | 11 | 72309540  | T | C | -0.662 | 0.508  | --+?  | 0     | 1.879  | 3 | 0.5979  |
| rs117493218 | 11 | 118027406 | C | A | 0.661  | 0.5084 | --+?? | 0     | 1.311  | 2 | 0.5191  |
| rs3181259   | 11 | 118214067 | A | G | 0.658  | 0.5102 | +++-- | 0     | 1.66   | 4 | 0.7979  |
| rs35305304  | 11 | 118228114 | T | C | 0.658  | 0.5106 | +++-- | 0     | 1.514  | 4 | 0.8242  |
| rs4938498   | 11 | 118162147 | G | C | -0.658 | 0.5108 | -?-?+ | -50   | 2.666  | 2 | 0.2637  |
| rs644287    | 11 | 118011805 | T | C | 0.656  | 0.5116 | +?+++ | 0     | 1.222  | 4 | 0.8744  |
| rs570836    | 11 | 118512162 | A | G | 0.655  | 0.5121 | +++?+ | 0     | 1.71   | 4 | 0.7889  |
| rs7940405   | 11 | 118142666 | G | A | -0.655 | 0.5124 | -?-?+ | -43.4 | 2.789  | 2 | 0.248   |
| rs10898872  | 11 | 72497425  | C | T | -0.655 | 0.5125 | +++?+ | 44.3  | 10.767 | 4 | 0.02931 |
| rs7123835   | 11 | 118368822 | G | T | 0.654  | 0.5133 | +?+++ | 0     | 2.35   | 3 | 0.503   |
| rs34180117  | 11 | 118138629 | T | C | -0.652 | 0.5143 | -?-?+ | 0     | 1.862  | 2 | 0.3941  |
| rs668468    | 11 | 118011776 | G | A | -0.651 | 0.5149 | +?+++ | 0     | 1.1    | 4 | 0.8943  |
| rs35850218  | 11 | 118138922 | C | T | -0.65  | 0.5157 | -?-?+ | 0     | 1.859  | 2 | 0.3948  |
| rs35865949  | 11 | 118229061 | A | T | 0.649  | 0.5163 | +++-- | 0     | 1.598  | 4 | 0.8092  |
| rs3782046   | 11 | 118230739 | A | G | 0.649  | 0.5164 | +++-- | 0     | 1.59   | 4 | 0.8105  |
| rs7107305   | 11 | 118368665 | G | A | 0.648  | 0.5169 | +?+++ | 0     | 2.351  | 3 | 0.5028  |
| rs894678    | 11 | 118172520 | A | G | -0.648 | 0.5172 | -?-?+ | -92   | 2.083  | 2 | 0.353   |
| rs45627033  | 11 | 118766018 | T | C | 0.647  | 0.5177 | +?+?? | -29.7 | 2.313  | 1 | 0.1283  |
| rs35610956  | 11 | 118144280 | G | A | -0.646 | 0.5181 | -?-?+ | -42   | 2.817  | 2 | 0.2445  |
| rs6589673   | 11 | 118557483 | C | A | 0.646  | 0.5184 | +?+++ | 0     | 0.618  | 3 | 0.8924  |
| rs12791838  | 11 | 118144209 | A | G | -0.645 | 0.519  | -?-?+ | -41.3 | 2.831  | 2 | 0.2427  |
| rs7389      | 11 | 118528466 | G | T | 0.645  | 0.519  | +++?+ | 0     | 1.55   | 4 | 0.8178  |
| rs3753060   | 11 | 118221137 | T | C | 0.645  | 0.5192 | +++-- | 0     | 1.508  | 4 | 0.8252  |
| rs56128937  | 11 | 118139478 | A | T | -0.644 | 0.5197 | -?-?+ | 0     | 1.837  | 2 | 0.3991  |
| rs3759007   | 11 | 118137667 | T | C | -0.643 | 0.5205 | -?-?+ | 0     | 1.846  | 2 | 0.3973  |
| rs3922      | 11 | 118765600 | G | A | -0.64  | 0.5224 | +?+-- | 0     | 1.328  | 4 | 0.8566  |
| rs7948683   | 11 | 118137911 | A | G | -0.639 | 0.5226 | -?-?+ | 0     | 1.825  | 2 | 0.4015  |
| rs3753059   | 11 | 118221349 | C | T | 0.639  | 0.5228 | +++-- | 0     | 1.506  | 4 | 0.8256  |
| rs3753058   | 11 | 118221350 | T | G | 0.639  | 0.523  | +++-- | 0     | 1.506  | 4 | 0.8257  |
| rs12420795  | 11 | 118161885 | G | C | -0.638 | 0.5234 | -?-?+ | -52.6 | 2.621  | 2 | 0.2697  |
| rs4938497   | 11 | 118160851 | A | G | -0.637 | 0.5238 | -?-?+ | -87.6 | 2.132  | 2 | 0.3443  |
| rs483283    | 11 | 118506402 | C | T | 0.637  | 0.5239 | +++?+ | 0     | 1.692  | 4 | 0.7922  |
| rs45474998  | 11 | 118229679 | A | G | 0.636  | 0.5245 | +++-- | 0     | 1.379  | 4 | 0.8478  |
| rs12419204  | 11 | 118497402 | A | T | 0.636  | 0.5248 | +++?+ | 0     | 1.726  | 4 | 0.786   |
| rs1791049   | 11 | 72890304  | T | C | 0.636  | 0.5251 | +++?+ | 0     | 3.742  | 4 | 0.442   |
| rs113839182 | 11 | 118273602 | T | C | 0.635  | 0.5255 | +?+?  | 0     | 2.707  | 3 | 0.439   |
| rs12801003  | 11 | 118072716 | T | C | 0.634  | 0.5263 | +?+?  | 0     | 1.281  | 3 | 0.7336  |
| rs12795307  | 11 | 72506324  | A | G | 0.634  | 0.5264 | +++-- | -47   | 4.08   | 4 | 0.3952  |
| rs7928058   | 11 | 118171239 | T | G | -0.63  | 0.5285 | -?-?+ | -54.3 | 2.592  | 2 | 0.2737  |
| rs2276418   | 11 | 118230264 | T | A | 0.629  | 0.5291 | +++-- | 0     | 1.393  | 4 | 0.8454  |
| rs1783583   | 11 | 72889432  | C | G | 0.628  | 0.5297 | +++?+ | 0     | 3.686  | 4 | 0.4502  |
| rs34405565  | 11 | 118233424 | T | C | 0.628  | 0.5299 | +++-- | 0     | 1.38   | 4 | 0.8476  |
| rs55852239  | 11 | 118139755 | A | G | -0.628 | 0.5299 | -?-?+ | 0     | 1.891  | 2 | 0.3885  |
| rs645637    | 11 | 118505090 | A | G | 0.627  | 0.5309 | +++?+ | 0     | 1.61   | 4 | 0.807   |
| rs3782045   | 11 | 118233078 | G | A | 0.626  | 0.5313 | +++-- | 0     | 1.364  | 4 | 0.8505  |
| rs117068828 | 11 | 72139241  | A | G | 0.626  | 0.5315 | -?+?+ | 0     | 1.875  | 2 | 0.3916  |
| rs4938490   | 11 | 118080977 | G | A | 0.624  | 0.5324 | +?+?+ | 0     | 0.641  | 2 | 0.7259  |
| rs570952    | 11 | 118500193 | C | T | 0.624  | 0.5326 | +++?+ | 0     | 1.697  | 4 | 0.7913  |
| rs11235546  | 11 | 72312118  | T | G | -0.624 | 0.5327 | --+?  | 0     | 1.981  | 3 | 0.5765  |
| rs11603616  | 11 | 118496066 | A | G | 0.623  | 0.533  | +++?+ | 0     | 1.793  | 4 | 0.7738  |
| rs341088    | 11 | 72313975  | T | C | -0.623 | 0.533  | --+?  | 0     | 1.611  | 3 | 0.6569  |
| rs595964    | 11 | 118026788 | A | G | -0.622 | 0.534  | +?+-- | 0     | 0.531  | 4 | 0.9705  |
| rs12795905  | 11 | 118140597 | T | C | -0.618 | 0.5365 | -?-?+ | 0     | 1.972  | 2 | 0.373   |
| rs12803321  | 11 | 118480115 | C | G | 0.618  | 0.5366 | +?+?+ | 0     | 1.047  | 3 | 0.7899  |

|             |    |           |   |   |        |        |       |       |       |   |        |
|-------------|----|-----------|---|---|--------|--------|-------|-------|-------|---|--------|
| rs12806041  | 11 | 118138998 | G | A | -0.617 | 0.5373 | -?-?+ | 0     | 1.778 | 2 | 0.4111 |
| rs571001    | 11 | 118500173 | T | C | 0.614  | 0.5389 | ++-+- | 0     | 1.75  | 4 | 0.7816 |
| rs11216815  | 11 | 118072232 | A | G | 0.613  | 0.5399 | +?-+- | 0     | 1.332 | 3 | 0.7215 |
| rs34786601  | 11 | 118140136 | C | T | -0.613 | 0.5399 | -?-?+ | 0     | 1.935 | 2 | 0.3801 |
| rs2276421   | 11 | 118239266 | A | G | 0.612  | 0.5404 | +++-- | 0     | 1.489 | 4 | 0.8285 |
| rs12789276  | 11 | 118140203 | G | A | -0.612 | 0.5405 | -?-?+ | 0     | 1.94  | 2 | 0.3791 |
| rs341049    | 11 | 72298208  | T | C | -0.61  | 0.542  | --+?- | 0     | 2.189 | 3 | 0.5341 |
| rs74535623  | 11 | 118812821 | T | G | 0.609  | 0.5423 | +--+? | 0     | 2.466 | 3 | 0.4815 |
| rs45448191  | 11 | 118267737 | A | T | 0.609  | 0.5425 | +?-+- | -63.1 | 3.066 | 3 | 0.3816 |
| rs73011440  | 11 | 118809619 | A | G | 0.609  | 0.5425 | +?+?? | 0     | 0.205 | 1 | 0.6504 |
| rs17122113  | 11 | 118234678 | G | A | 0.608  | 0.5433 | +++-- | 0     | 1.364 | 4 | 0.8505 |
| rs7104819   | 11 | 118769442 | G | A | -0.606 | 0.5442 | --+-- | 0     | 1.481 | 4 | 0.8301 |
| rs11607701  | 11 | 118169825 | G | A | -0.606 | 0.5446 | -?-?+ | -50.8 | 2.653 | 2 | 0.2654 |
| rs12416826  | 11 | 118165955 | C | T | -0.604 | 0.546  | -?-?+ | -46.6 | 2.729 | 2 | 0.2555 |
| rs2077173   | 11 | 118492591 | A | G | 0.602  | 0.5474 | ++-+- | 0     | 1.853 | 4 | 0.7627 |
| rs11600544  | 11 | 118076954 | C | G | 0.601  | 0.5479 | +?+?+ | 0     | 0.58  | 2 | 0.7482 |
| rs17121881  | 11 | 118081345 | A | T | 0.601  | 0.5479 | +?+?+ | 0     | 0.662 | 2 | 0.7184 |
| rs2032397   | 11 | 118153697 | A | G | -0.601 | 0.5481 | -?-?+ | -53.3 | 2.609 | 2 | 0.2713 |
| rs12793790  | 11 | 118140372 | A | G | -0.599 | 0.5489 | -?-?+ | 0     | 1.955 | 2 | 0.3762 |
| rs1805      | 11 | 118076069 | T | G | 0.599  | 0.5492 | +?+?+ | 0     | 0.612 | 2 | 0.7363 |
| rs2032398   | 11 | 118153708 | C | G | -0.599 | 0.5492 | -?-?+ | -53.5 | 2.605 | 2 | 0.2718 |
| rs17121879  | 11 | 118080133 | G | T | 0.598  | 0.5496 | +?+?+ | 0     | 0.602 | 2 | 0.7402 |
| rs1617182   | 11 | 118068949 | C | T | 0.598  | 0.5497 | +?-?+ | 0     | 0.577 | 2 | 0.7493 |
| rs4938489   | 11 | 118079867 | G | T | 0.598  | 0.55   | +?+?+ | 0     | 0.602 | 2 | 0.74   |
| rs73557345  | 11 | 118813314 | C | T | 0.597  | 0.5503 | +--+? | 0     | 2.463 | 3 | 0.482  |
| rs17121882  | 11 | 118081468 | C | T | 0.594  | 0.5528 | +?+?+ | 0     | 0.637 | 2 | 0.7274 |
| rs10790254  | 11 | 118493319 | A | G | 0.591  | 0.5545 | +?+-  | 0     | 0.544 | 3 | 0.909  |
| rs73612281  | 11 | 118203642 | T | C | -0.588 | 0.5566 | -?--+ | 0     | 1.081 | 3 | 0.7817 |
| rs7116876   | 11 | 118371025 | C | G | 0.587  | 0.5569 | +?+-  | 0     | 2.185 | 3 | 0.5348 |
| rs1793167   | 11 | 118102058 | T | C | 0.585  | 0.5588 | +?-+- | 0     | 2.06  | 3 | 0.56   |
| rs61751532  | 11 | 118769604 | T | C | 0.585  | 0.5588 | -?++? | 0     | 1.217 | 2 | 0.5441 |
| rs140633990 | 11 | 118365883 | A | T | -0.583 | 0.5601 | ---?? | 0     | 0.136 | 2 | 0.9342 |
| rs9332835   | 11 | 118372923 | A | G | 0.575  | 0.5652 | +?+-  | 0     | 2.228 | 3 | 0.5265 |
| rs2120268   | 11 | 118132705 | A | G | 0.571  | 0.5678 | +?-+- | 0     | 1.36  | 3 | 0.715  |
| rs7117594   | 11 | 118714492 | T | C | -0.57  | 0.5686 | +++-  | 11.9  | 6.807 | 4 | 0.1464 |
| rs3018383   | 11 | 118093359 | A | C | 0.569  | 0.5695 | +?-+- | 0     | 2.03  | 3 | 0.5662 |
| rs12801084  | 11 | 72991793  | G | C | -0.567 | 0.5707 | --+-- | 0     | 3.793 | 4 | 0.4348 |
| rs10790258  | 11 | 118561859 | T | G | 0.567  | 0.5708 | +?+-  | 0     | 0.402 | 3 | 0.9398 |
| rs1793155   | 11 | 118098962 | A | G | 0.566  | 0.5712 | +?-+- | 0     | 2.022 | 3 | 0.5678 |
| rs4938517   | 11 | 118487673 | C | T | 0.565  | 0.5721 | ++-+- | 0     | 1.875 | 4 | 0.7588 |
| rs10790240  | 11 | 118009279 | G | T | 0.563  | 0.5731 | +--+  | 0     | 1.661 | 4 | 0.7977 |
| rs663015    | 11 | 72499035  | C | T | 0.562  | 0.5741 | ++--- | -47.7 | 4.064 | 4 | 0.3975 |
| rs1793156   | 11 | 118098890 | C | T | 0.561  | 0.5746 | +?-+- | 0     | 2.035 | 3 | 0.5651 |
| rs11235711  | 11 | 72992343  | C | G | -0.56  | 0.5752 | --+-- | 0     | 3.817 | 4 | 0.4313 |
| rs10790257  | 11 | 118561858 | C | G | 0.56   | 0.5754 | +?+-  | 0     | 0.416 | 3 | 0.937  |
| rs519790    | 11 | 72504141  | G | C | 0.56   | 0.5757 | ++--- | -34.2 | 4.472 | 4 | 0.3459 |
| rs656445    | 11 | 118012164 | A | G | 0.558  | 0.577  | +--+  | 0     | 1.101 | 4 | 0.8941 |
| rs9332846   | 11 | 118377523 | A | G | 0.557  | 0.5778 | +?+-  | 0     | 2.165 | 3 | 0.5388 |
| rs148643334 | 11 | 118358152 | C | T | 0.556  | 0.5782 | +?+-  | 0     | 2.143 | 3 | 0.5433 |
| rs17310235  | 11 | 72607076  | G | A | 0.552  | 0.581  | ++-+- | 0     | 1.605 | 4 | 0.8079 |
| rs11235713  | 11 | 72997496  | G | A | -0.552 | 0.5812 | --+-- | 0     | 3.376 | 4 | 0.4971 |
| rs1793169   | 11 | 118070264 | G | A | 0.55   | 0.5826 | +?-?+ | 0     | 0.608 | 2 | 0.7378 |
| rs1715444   | 11 | 118016273 | G | T | -0.549 | 0.5827 | -++-- | 0     | 0.829 | 4 | 0.9345 |
| rs1793185   | 11 | 118089434 | A | C | 0.549  | 0.5829 | +?-+- | 0     | 1.868 | 3 | 0.6003 |
| rs9332816   | 11 | 118364404 | T | G | 0.547  | 0.5842 | +?+-  | 0     | 2.054 | 3 | 0.5612 |
| rs9332809   | 11 | 118361472 | A | G | 0.547  | 0.5843 | +?+-  | 0     | 2.039 | 3 | 0.5643 |

|             |    |           |   |   |        |        |       |       |        |   |         |
|-------------|----|-----------|---|---|--------|--------|-------|-------|--------|---|---------|
| rs7105658   | 11 | 118712270 | T | C | -0.543 | 0.5869 | +++-  | 9.3   | 6.618  | 4 | 0.1575  |
| rs2276045   | 11 | 118365168 | A | G | 0.54   | 0.5894 | +?+-  | 0     | 2.083  | 3 | 0.5553  |
| rs6589656   | 11 | 118095996 | C | G | 0.54   | 0.5895 | +?+-  | 0     | 2.322  | 3 | 0.5082  |
| rs11604683  | 11 | 72538546  | C | T | -0.539 | 0.5899 | ++--  | 0     | 1.773  | 4 | 0.7774  |
| rs11235710  | 11 | 72992156  | G | C | -0.538 | 0.5905 | --+-  | 0     | 3.85   | 4 | 0.4266  |
| rs1612659   | 11 | 72835303  | T | C | -0.536 | 0.5919 | ++--  | 0     | 2.807  | 4 | 0.5906  |
| rs3802863   | 11 | 118099186 | T | C | 0.536  | 0.5919 | +?+-  | 0     | 2.304  | 3 | 0.5117  |
| rs12799445  | 11 | 72592506  | G | T | -0.531 | 0.5956 | +++-  | 0     | 3.473  | 4 | 0.4821  |
| rs1626649   | 11 | 118071097 | T | C | 0.526  | 0.599  | +?+-  | 0     | 0.625  | 2 | 0.7317  |
| rs4938505   | 11 | 118205636 | A | G | -0.525 | 0.5993 | -?--  | 0     | 1.22   | 3 | 0.7481  |
| rs9332851   | 11 | 118381018 | T | C | 0.524  | 0.5999 | +?+-  | 0     | 0.907  | 3 | 0.8237  |
| rs371412    | 11 | 72303491  | A | G | -0.524 | 0.6006 | +?+-  | -93.1 | 2.071  | 2 | 0.355   |
| rs12363628  | 11 | 72987038  | C | T | -0.521 | 0.6024 | --+-  | 0     | 3.813  | 4 | 0.4319  |
| rs7946861   | 11 | 72557986  | G | A | -0.519 | 0.6036 | +++-  | 0     | 3.66   | 4 | 0.4539  |
| rs7101652   | 11 | 118078718 | A | G | 0.515  | 0.6067 | +?+-  | 0     | 1.201  | 3 | 0.7527  |
| rs12788624  | 11 | 118022107 | T | C | -0.515 | 0.6068 | ++?+  | -24.7 | 4.009  | 3 | 0.2605  |
| rs45555132  | 11 | 118064030 | T | G | -0.512 | 0.6086 | -?+-  | 0     | 0.425  | 2 | 0.8084  |
| rs7112584   | 11 | 118069240 | A | G | 0.511  | 0.6092 | +?+-  | 0     | 1.194  | 3 | 0.7545  |
| rs1945764   | 11 | 118182801 | G | A | -0.507 | 0.6123 | ---?+ | -51.9 | 3.292  | 3 | 0.3487  |
| rs7936751   | 11 | 72720199  | G | T | 0.507  | 0.6123 | --+-  | 31.7  | 8.791  | 4 | 0.06655 |
| rs7103936   | 11 | 118091636 | C | A | 0.506  | 0.6127 | +?+-  | 0     | 1.976  | 3 | 0.5773  |
| rs384892    | 11 | 72309889  | A | G | -0.505 | 0.6135 | +?+-  | 0     | 1.458  | 2 | 0.4823  |
| rs4306318   | 11 | 118080520 | T | C | 0.5    | 0.6172 | +?+-  | 0     | 1.157  | 3 | 0.7633  |
| rs9332858   | 11 | 118390082 | C | A | 0.499  | 0.6179 | +?+-  | 0     | 2.068  | 3 | 0.5585  |
| rs4432047   | 11 | 72989489  | G | A | -0.498 | 0.6183 | --+-  | -49.8 | 4.005  | 4 | 0.4054  |
| rs12808111  | 11 | 72992714  | G | A | -0.497 | 0.6194 | --+-  | -44.3 | 4.159  | 4 | 0.3849  |
| rs11216818  | 11 | 118080268 | T | C | 0.496  | 0.62   | +?+-  | 0     | 1.165  | 3 | 0.7613  |
| rs7116375   | 11 | 118069979 | A | C | 0.495  | 0.6204 | +?+-  | 0     | 1.338  | 3 | 0.7202  |
| rs7951159   | 11 | 118780950 | T | C | -0.494 | 0.6213 | -?+?  | 0     | 0.788  | 1 | 0.3748  |
| rs9332819   | 11 | 118365263 | T | C | 0.494  | 0.6213 | +?+-  | 0     | 1.897  | 3 | 0.5941  |
| rs79157249  | 11 | 118785982 | T | A | 0.492  | 0.6228 | +-++  | 30.1  | 8.578  | 4 | 0.07255 |
| rs111997050 | 11 | 118387892 | T | C | 0.49   | 0.6239 | +?+-  | 0     | 1.781  | 3 | 0.6191  |
| rs11600134  | 11 | 118070788 | A | G | 0.49   | 0.6242 | +?+-  | 0     | 1.374  | 3 | 0.7117  |
| rs12793150  | 11 | 118180667 | G | C | -0.49  | 0.6243 | ---?+ | 0     | 2.724  | 3 | 0.4362  |
| rs59049611  | 11 | 118139403 | C | T | -0.489 | 0.6246 | -?+-  | 0     | 1.911  | 2 | 0.3846  |
| rs111405302 | 11 | 118385691 | C | T | 0.488  | 0.6257 | +?+-  | 0     | 2.188  | 3 | 0.5343  |
| rs11235708  | 11 | 72985098  | A | G | -0.488 | 0.6257 | --+-  | 0     | 3.794  | 4 | 0.4346  |
| rs604096    | 11 | 118475098 | G | A | -0.483 | 0.6288 | --+-  | -11.2 | 5.397  | 4 | 0.2489  |
| rs1599810   | 11 | 118179197 | A | G | -0.481 | 0.6302 | ---?+ | -48.5 | 3.366  | 3 | 0.3386  |
| rs7102253   | 11 | 72792697  | C | T | -0.48  | 0.6311 | +++-  | 0     | 3.526  | 4 | 0.474   |
| rs34385073  | 11 | 72987413  | C | A | -0.48  | 0.6312 | --+-  | 0     | 3.982  | 4 | 0.4085  |
| rs3862796   | 11 | 72705522  | T | C | -0.48  | 0.6315 | +-+-  | 0     | 3.611  | 4 | 0.4612  |
| rs75461585  | 11 | 118287568 | G | A | -0.479 | 0.6319 | -?--  | 0     | 2.411  | 3 | 0.4915  |
| rs7116594   | 11 | 72984870  | A | G | -0.478 | 0.6324 | --+-  | 0     | 3.872  | 4 | 0.4236  |
| rs17122021  | 11 | 118145686 | T | C | -0.478 | 0.6327 | -?+-  | 0     | 1.78   | 2 | 0.4106  |
| rs7129921   | 11 | 72676874  | G | T | 0.476  | 0.6343 | +-++  | 43.5  | 10.613 | 4 | 0.03127 |
| rs4938493   | 11 | 118144804 | G | T | -0.475 | 0.6345 | -?+-  | 0     | 1.862  | 2 | 0.3941  |
| rs12286021  | 11 | 118080685 | C | T | 0.475  | 0.6346 | +?+-  | 0     | 1.278  | 3 | 0.7345  |
| rs35963948  | 11 | 72991186  | G | A | -0.475 | 0.6351 | --+-  | 0     | 3.649  | 4 | 0.4556  |
| rs4245180   | 11 | 118144512 | A | G | -0.474 | 0.6353 | -?+-  | 0     | 1.792  | 2 | 0.4082  |
| rs4938502   | 11 | 118179941 | T | G | -0.473 | 0.636  | ---?+ | 0     | 2.821  | 3 | 0.4201  |
| rs11216822  | 11 | 118091375 | A | G | 0.472  | 0.6367 | +?+-  | 0     | 2.052  | 3 | 0.5616  |
| rs45621436  | 11 | 118483912 | G | T | 0.471  | 0.6379 | +?+-  | 0     | 0.717  | 3 | 0.8692  |
| rs2097183   | 11 | 118091067 | T | C | 0.47   | 0.6381 | +?+-  | 0     | 2.05   | 3 | 0.562   |
| rs12280559  | 11 | 118087040 | T | C | 0.469  | 0.6389 | +?+-  | 0     | 2.127  | 3 | 0.5465  |
| rs687664    | 11 | 118574185 | A | C | 0.468  | 0.6397 | ++?+  | 0     | 2.042  | 3 | 0.5637  |

|             |    |           |   |   |        |        |        |       |       |   |         |
|-------------|----|-----------|---|---|--------|--------|--------|-------|-------|---|---------|
| rs523715    | 11 | 118574188 | A | G | 0.468  | 0.6399 | ++-?+  | 0     | 2.043 | 3 | 0.5635  |
| rs4488208   | 11 | 118877621 | C | G | -0.467 | 0.6404 | -?+?-  | 29.3  | 5.654 | 2 | 0.05918 |
| rs78020509  | 11 | 118384811 | G | A | 0.465  | 0.642  | +?++-  | 0     | 2.287 | 3 | 0.5151  |
| rs7940554   | 11 | 118142930 | T | C | -0.465 | 0.642  | -?+?-  | 0     | 1.814 | 2 | 0.4037  |
| rs12805658  | 11 | 72555300  | A | C | -0.462 | 0.6442 | +++--  | 0     | 3.378 | 4 | 0.4966  |
| rs2187494   | 11 | 72805603  | G | A | -0.46  | 0.6453 | +++--  | 0     | 2.505 | 4 | 0.6438  |
| rs1715420   | 11 | 118105599 | A | T | 0.46   | 0.6456 | +?+--  | 0     | 1.627 | 3 | 0.6532  |
| rs11235617  | 11 | 72644631  | C | T | 0.459  | 0.6464 | +?+--  | 0     | 1.604 | 3 | 0.6586  |
| rs72979412  | 11 | 72639396  | C | T | 0.458  | 0.6467 | +?+--  | 0     | 1.587 | 3 | 0.6624  |
| rs341086    | 11 | 72317803  | T | C | -0.458 | 0.6469 | --+?-  | 0     | 1.852 | 3 | 0.6036  |
| rs57506367  | 11 | 118141993 | C | T | -0.456 | 0.6484 | -?+?-  | 0     | 1.852 | 2 | 0.3962  |
| rs4245179   | 11 | 118144445 | G | A | -0.456 | 0.6486 | -?+?-  | 0     | 1.852 | 2 | 0.396   |
| rs1632118   | 11 | 72881636  | T | C | -0.455 | 0.6492 | -+-+-- | -23.2 | 4.872 | 4 | 0.3007  |
| rs7940047   | 11 | 118142619 | T | C | -0.451 | 0.6518 | -?+?-  | 0     | 1.79  | 2 | 0.4086  |
| rs113399762 | 11 | 118389698 | C | T | 0.45   | 0.6528 | +?++-  | 0     | 2.394 | 3 | 0.4947  |
| rs112590920 | 11 | 118143586 | A | G | -0.45  | 0.653  | -?+?-  | 0     | 1.775 | 2 | 0.4116  |
| rs57461652  | 11 | 118146197 | A | C | -0.448 | 0.6541 | -?+?-  | -99.3 | 2.007 | 2 | 0.3665  |
| rs1715421   | 11 | 118105233 | C | T | 0.448  | 0.6542 | +?+--  | 0     | 1.648 | 3 | 0.6486  |
| rs2075647   | 11 | 118037964 | C | G | -0.445 | 0.6565 | -?-?+  | 0     | 1.586 | 2 | 0.4525  |
| rs1793137   | 11 | 118016068 | C | T | -0.444 | 0.6568 | ---++  | 0     | 0.395 | 4 | 0.9829  |
| rs1793159   | 11 | 118104569 | A | C | 0.442  | 0.6586 | +?+--  | 0     | 1.665 | 3 | 0.6447  |
| rs35409990  | 11 | 118109196 | A | G | 0.442  | 0.6587 | +?+--  | 0     | 1.839 | 3 | 0.6065  |
| rs1715422   | 11 | 118104577 | C | T | 0.442  | 0.6588 | +?+--  | 0     | 1.666 | 3 | 0.6446  |
| rs12275955  | 11 | 118094756 | C | T | 0.439  | 0.6607 | +?+--  | 0     | 2.321 | 3 | 0.5085  |
| rs3181261   | 11 | 118212671 | T | C | 0.438  | 0.6615 | +?+?-  | 0     | 1.184 | 2 | 0.5532  |
| rs382163    | 11 | 72292796  | T | C | 0.436  | 0.663  | -?+?-  | 0     | 1.35  | 2 | 0.5091  |
| rs58162302  | 11 | 118146199 | T | A | -0.434 | 0.6642 | -?+?-  | 0     | 1.994 | 2 | 0.369   |
| rs10793048  | 11 | 72580398  | T | C | -0.434 | 0.6643 | +++--  | 0     | 2.947 | 4 | 0.5667  |
| rs7107376   | 11 | 72640991  | G | T | 0.431  | 0.6662 | +?+--  | 0     | 1.624 | 3 | 0.654   |
| rs12808517  | 11 | 72601276  | T | C | -0.424 | 0.6713 | +++--  | 0     | 1.805 | 4 | 0.7716  |
| rs186926311 | 11 | 118601426 | T | C | -0.424 | 0.6715 | --++?  | -18   | 4.237 | 3 | 0.237   |
| rs67389832  | 11 | 118839032 | A | C | -0.423 | 0.6724 | -?+?-  | 1     | 4.042 | 2 | 0.1325  |
| rs1628409   | 11 | 72885257  | T | C | 0.422  | 0.673  | +++--  | 0     | 2.57  | 4 | 0.6322  |
| rs112337443 | 11 | 118530068 | C | T | 0.422  | 0.6731 | +-+--  | -39.8 | 4.292 | 4 | 0.368   |
| rs1715453   | 11 | 118125077 | T | C | -0.421 | 0.6735 | +?+?-  | 0     | 1.129 | 2 | 0.5687  |
| rs7117266   | 11 | 118838020 | A | G | -0.418 | 0.6758 | -?+?-  | 2.5   | 4.104 | 2 | 0.1285  |
| rs1786183   | 11 | 118017445 | A | G | 0.415  | 0.6779 | -?+++  | 0     | 1.427 | 3 | 0.6993  |
| rs1056562   | 11 | 118125625 | T | C | -0.414 | 0.6786 | +?+?-  | 0     | 1.12  | 2 | 0.5712  |
| rs2231439   | 11 | 118174885 | G | A | -0.409 | 0.6826 | -?-?+  | 0     | 1.158 | 2 | 0.5604  |
| rs11216828  | 11 | 118111676 | A | T | 0.406  | 0.685  | +?+--  | 0     | 1.859 | 3 | 0.6022  |
| rs4944016   | 11 | 72597438  | T | C | -0.404 | 0.6859 | +++--  | 0     | 3.723 | 4 | 0.4448  |
| rs4442562   | 11 | 118845813 | A | G | -0.4   | 0.6892 | -?+?-  | 1.2   | 4.049 | 2 | 0.1321  |
| rs9332871   | 11 | 118393856 | T | G | 0.398  | 0.6905 | +?++-  | 0     | 2.117 | 3 | 0.5485  |
| rs1793151   | 11 | 118126920 | C | T | -0.396 | 0.6919 | +?+?-  | 0     | 1.09  | 2 | 0.5798  |
| rs9651667   | 11 | 118108679 | G | C | 0.393  | 0.6946 | +?+--  | 0     | 1.7   | 3 | 0.637   |
| rs1715449   | 11 | 118128455 | G | A | -0.391 | 0.6956 | +?+?-  | 0     | 1.083 | 2 | 0.5819  |
| rs1715450   | 11 | 118128445 | C | G | -0.39  | 0.6964 | +?+?-  | 0     | 1.082 | 2 | 0.5821  |
| rs9332801   | 11 | 118355642 | C | A | 0.386  | 0.6991 | +?++-  | 0     | 1.9   | 3 | 0.5934  |
| rs10502228  | 11 | 118113583 | T | C | 0.386  | 0.6996 | +?+--  | 0     | 2.03  | 3 | 0.5662  |
| rs1793150   | 11 | 118127314 | G | A | -0.385 | 0.7001 | +?+?-  | 0     | 1.081 | 2 | 0.5824  |
| rs76448372  | 11 | 118045846 | A | G | -0.383 | 0.702  | -?+--  | 11.9  | 5.675 | 3 | 0.1285  |
| rs146525935 | 11 | 118180887 | C | T | -0.382 | 0.7025 | -?+--  | -0.7  | 4.964 | 3 | 0.1744  |
| rs9651688   | 11 | 118107495 | T | C | 0.381  | 0.7031 | +?+--  | 0     | 1.709 | 3 | 0.635   |
| rs11216839  | 11 | 118129583 | T | A | 0.381  | 0.7033 | +?+--  | 0     | 1.761 | 3 | 0.6235  |
| rs11216829  | 11 | 118112911 | A | G | 0.381  | 0.7034 | +?+--  | 0     | 2.032 | 3 | 0.5657  |
| rs73003294  | 11 | 118661376 | T | C | 0.379  | 0.7048 | -?+--  | 15.4  | 5.914 | 3 | 0.1159  |

|             |    |           |   |   |        |        |       |       |        |   |          |
|-------------|----|-----------|---|---|--------|--------|-------|-------|--------|---|----------|
| rs7113994   | 11 | 118382327 | G | A | 0.379  | 0.705  | +?++- | 0     | 2.34   | 3 | 0.5049   |
| rs61895726  | 11 | 72223735  | T | C | 0.378  | 0.7051 | +?+-+ | 0     | 2.405  | 3 | 0.4926   |
| rs11216813  | 11 | 118071836 | A | G | 0.377  | 0.7059 | +?--+ | 0     | 1.067  | 3 | 0.7851   |
| rs117745694 | 11 | 118218491 | A | G | 0.376  | 0.7066 | +?--+ | 0     | 0.781  | 3 | 0.8541   |
| rs1980091   | 11 | 72288599  | A | G | 0.375  | 0.7075 | -?+?- | 0     | 0.74   | 2 | 0.6908   |
| rs12291619  | 11 | 118062552 | A | G | -0.374 | 0.7081 | +?--+ | 0     | 0.717  | 3 | 0.8691   |
| rs341089    | 11 | 72313462  | A | G | -0.374 | 0.7082 | +?+?- | 0     | 1.405  | 2 | 0.4953   |
| rs655499    | 11 | 118063479 | G | A | 0.373  | 0.7088 | ++-+- | 0     | 0.244  | 4 | 0.9931   |
| rs117532939 | 11 | 72165516  | G | A | 0.372  | 0.71   | -?+?- | -91.4 | 2.09   | 2 | 0.3517   |
| rs117817588 | 11 | 72166041  | T | G | 0.372  | 0.71   | -?+?- | -91.4 | 2.09   | 2 | 0.3517   |
| rs426907    | 11 | 72294440  | A | G | 0.371  | 0.7108 | -?+?- | 0     | 0.695  | 2 | 0.7066   |
| rs658624    | 11 | 118018767 | G | A | 0.369  | 0.7121 | -?+++ | 0     | 1.655  | 3 | 0.6469   |
| rs1793149   | 11 | 118127347 | A | G | -0.368 | 0.7127 | +?+?- | 0     | 1.072  | 2 | 0.585    |
| rs56083337  | 11 | 118131813 | T | A | -0.368 | 0.713  | -?+?+ | 0     | 1.54   | 2 | 0.463    |
| rs11822039  | 11 | 72638704  | A | C | -0.367 | 0.7136 | ++-+- | 0     | 3.725  | 4 | 0.4444   |
| rs76478216  | 11 | 118605352 | C | T | 0.365  | 0.7153 | +?--+ | -4.9  | 4.764  | 3 | 0.1899   |
| rs12286303  | 11 | 118114473 | T | C | 0.364  | 0.7156 | +?--+ | 0     | 2.044  | 3 | 0.5634   |
| rs1793157   | 11 | 118017434 | C | A | 0.364  | 0.716  | +++++ | 0     | 1.782  | 4 | 0.7757   |
| rs55768116  | 11 | 118108331 | A | C | -0.362 | 0.7177 | -?-?+ | 0     | 1.299  | 2 | 0.5224   |
| rs7117544   | 11 | 118117938 | C | A | 0.361  | 0.7183 | +?--+ | 0     | 2.066  | 3 | 0.5587   |
| rs12286567  | 11 | 118114788 | T | G | 0.358  | 0.7201 | +?--+ | 0     | 2.035  | 3 | 0.5653   |
| rs45460396  | 11 | 118005622 | G | T | -0.357 | 0.7207 | -+-++ | 0     | 1.42   | 4 | 0.8407   |
| rs1715443   | 11 | 118017365 | G | T | 0.357  | 0.7214 | -?+++ | 0     | 1.8    | 3 | 0.615    |
| rs11605435  | 11 | 118116496 | C | T | 0.355  | 0.7228 | +?--+ | 0     | 2.054  | 3 | 0.5612   |
| rs1547885   | 11 | 118105222 | T | C | 0.354  | 0.723  | +?--+ | 0     | 1.781  | 3 | 0.619    |
| rs371862    | 11 | 72288843  | T | C | 0.354  | 0.7231 | -?+?- | 0     | 1.058  | 2 | 0.5891   |
| rs341047    | 11 | 72301503  | A | G | -0.354 | 0.7233 | +?+?- | 0     | 1.908  | 2 | 0.3852   |
| rs61900158  | 11 | 118831764 | A | T | -0.353 | 0.7244 | -?+?- | 18.2  | 4.89   | 2 | 0.08671  |
| rs868344    | 11 | 118005119 | C | T | -0.351 | 0.7255 | -+-++ | 0     | 1.354  | 4 | 0.8522   |
| rs149668068 | 11 | 118099735 | A | G | -0.35  | 0.7262 | -?--+ | 0     | 2.166  | 3 | 0.5386   |
| rs613791    | 11 | 118764051 | T | C | 0.349  | 0.7269 | +?++- | 59.8  | 12.44  | 3 | 0.006018 |
| rs3018387   | 11 | 118016981 | T | A | 0.347  | 0.7283 | -?+++ | 0     | 1.768  | 3 | 0.622    |
| rs9332857   | 11 | 118389440 | T | C | 0.347  | 0.7284 | +?++- | 0     | 1.96   | 3 | 0.5807   |
| rs45584835  | 11 | 118004863 | G | A | -0.346 | 0.7292 | -+-++ | 0     | 1.386  | 4 | 0.8467   |
| rs12280557  | 11 | 118117118 | T | C | 0.345  | 0.7299 | +?--+ | 0     | 2.086  | 3 | 0.5548   |
| rs880895    | 11 | 72884382  | A | G | 0.345  | 0.7303 | ++-+- | 0     | 2.785  | 4 | 0.5943   |
| rs392565    | 11 | 72290629  | A | G | 0.343  | 0.7315 | -?+?- | 0     | 1.136  | 2 | 0.5667   |
| rs2853009   | 11 | 118148146 | G | A | -0.34  | 0.7337 | +?+?- | 0     | 1.73   | 2 | 0.421    |
| rs7127705   | 11 | 72999064  | T | C | -0.34  | 0.734  | --+-  | -48.4 | 4.043  | 4 | 0.4003   |
| rs9332852   | 11 | 118381069 | T | C | 0.339  | 0.7348 | +?++- | 0     | 2.01   | 3 | 0.5703   |
| rs6589649   | 11 | 118048836 | C | T | -0.338 | 0.7354 | +?--+ | 0     | 0.773  | 3 | 0.8559   |
| rs10898915  | 11 | 72998687  | A | G | -0.335 | 0.7375 | --+-  | -38.4 | 4.334  | 4 | 0.3627   |
| rs61895701  | 11 | 72208039  | G | T | 0.335  | 0.7377 | +?+-+ | 0     | 2.334  | 3 | 0.506    |
| rs11216830  | 11 | 118115147 | A | G | 0.335  | 0.7378 | +?--+ | 0     | 2.059  | 3 | 0.5602   |
| rs7127013   | 11 | 72999221  | A | G | -0.334 | 0.7382 | --+-  | -44.3 | 4.157  | 4 | 0.3851   |
| rs3132744   | 11 | 72886304  | G | A | 0.334  | 0.7387 | ++-+- | -25.4 | 4.785  | 4 | 0.3101   |
| rs75709684  | 11 | 118050958 | A | G | -0.332 | 0.7397 | +?--+ | 0     | 1.043  | 3 | 0.7909   |
| rs543824    | 11 | 118762218 | G | A | -0.331 | 0.7403 | +-+-- | 54.5  | 13.182 | 4 | 0.01042  |
| rs67533649  | 11 | 118835272 | G | A | -0.328 | 0.7427 | -?+?- | 23    | 5.193  | 2 | 0.07452  |
| rs146523897 | 11 | 72161854  | A | G | 0.328  | 0.743  | -?+?- | -79.1 | 2.233  | 2 | 0.3274   |
| rs11235712  | 11 | 72994199  | C | T | -0.327 | 0.7434 | --+-  | -15.4 | 5.198  | 4 | 0.2676   |
| rs45460493  | 11 | 118455465 | A | G | 0.326  | 0.7442 | +?+-- | 0     | 0.734  | 3 | 0.8652   |
| rs4938595   | 11 | 118832582 | T | G | -0.326 | 0.7445 | -?+?- | 23.9  | 5.258  | 2 | 0.07214  |
| rs2946742   | 11 | 118017093 | G | A | 0.325  | 0.7451 | -?+++ | 0     | 1.79   | 3 | 0.617    |
| rs112636863 | 11 | 118333510 | C | T | 0.322  | 0.7471 | +?++- | 0     | 1.857  | 3 | 0.6026   |
| rs10892230  | 11 | 118126682 | A | C | 0.321  | 0.7479 | +?--+ | 0     | 2.137  | 3 | 0.5444   |

|             |    |           |   |   |        |        |        |       |       |   |         |
|-------------|----|-----------|---|---|--------|--------|--------|-------|-------|---|---------|
| rs1783574   | 11 | 72863527  | A | G | 0.32   | 0.7486 | ++-+-  | 0     | 2.044 | 4 | 0.7276  |
| rs7113959   | 11 | 118379096 | A | T | 0.32   | 0.7487 | +?++-  | 0     | 2.261 | 3 | 0.5201  |
| rs7342287   | 11 | 118050404 | A | G | -0.32  | 0.7492 | +?---+ | 0     | 0.749 | 3 | 0.8616  |
| rs10736494  | 11 | 118518227 | T | C | 0.319  | 0.7495 | +?++-  | 0     | 0.842 | 3 | 0.8394  |
| rs9332793   | 11 | 118354458 | A | G | 0.318  | 0.7504 | +?+-   | 0     | 1.856 | 3 | 0.6028  |
| rs111901186 | 11 | 118328052 | G | A | 0.317  | 0.7512 | +?+-   | 0     | 1.85  | 3 | 0.6041  |
| rs113028342 | 11 | 118333537 | G | A | 0.317  | 0.7514 | +?++-  | 0     | 1.848 | 3 | 0.6046  |
| rs2946743   | 11 | 118017088 | G | A | 0.316  | 0.7518 | -?+++  | 0     | 1.824 | 3 | 0.6096  |
| rs77806521  | 11 | 118232026 | T | C | -0.315 | 0.7525 | +?+?-  | 0     | 1.39  | 2 | 0.4991  |
| rs112900272 | 11 | 118326445 | T | C | 0.315  | 0.7527 | +?+-   | 0     | 1.851 | 3 | 0.604   |
| rs11216834  | 11 | 118122077 | C | T | 0.315  | 0.753  | +?+-   | 0     | 2.123 | 3 | 0.5473  |
| rs10790246  | 11 | 118103542 | T | A | 0.315  | 0.7531 | +?+-   | 0     | 1.803 | 3 | 0.6144  |
| rs10898889  | 11 | 72605382  | C | G | -0.312 | 0.755  | ++-+-  | 0     | 3.964 | 4 | 0.4109  |
| rs9332794   | 11 | 118354505 | T | G | 0.311  | 0.7555 | +?+-   | 0     | 1.862 | 3 | 0.6016  |
| rs7121712   | 11 | 72993695  | A | T | -0.311 | 0.7556 | --+-   | -28.6 | 4.666 | 4 | 0.3233  |
| rs614825    | 11 | 118018725 | G | A | 0.31   | 0.7566 | -?+++  | 0     | 1.686 | 3 | 0.64    |
| rs2027764   | 11 | 72998247  | G | A | -0.307 | 0.7589 | --+-   | -41.1 | 4.252 | 4 | 0.373   |
| rs35381826  | 11 | 118032438 | T | G | -0.306 | 0.76   | -?+-   | 0     | 0.105 | 3 | 0.9913  |
| rs57533048  | 11 | 118050014 | G | A | -0.301 | 0.7636 | +?---+ | 0     | 0.915 | 3 | 0.8217  |
| rs77643000  | 11 | 118749563 | C | T | 0.3    | 0.7639 | ++++-  | -1.7  | 5.897 | 4 | 0.207   |
| rs12575015  | 11 | 118197645 | T | A | -0.299 | 0.7646 | -?-?+  | 0     | 0.637 | 2 | 0.7274  |
| rs71482132  | 11 | 118031211 | A | G | -0.298 | 0.7655 | -?+-   | 0     | 0.129 | 3 | 0.9882  |
| rs4420279   | 11 | 118835677 | A | C | -0.298 | 0.7657 | -?+?-  | 27.6  | 5.523 | 2 | 0.06319 |
| rs116848264 | 11 | 118049817 | A | T | 0.298  | 0.7658 | -?+-   | 0     | 2.744 | 3 | 0.4328  |
| rs67163042  | 11 | 118050779 | G | A | -0.297 | 0.7664 | +?---+ | 0     | 0.739 | 3 | 0.864   |
| rs640323    | 11 | 118010890 | C | G | 0.296  | 0.7672 | ++-+-  | 0     | 1.361 | 4 | 0.851   |
| rs882904    | 11 | 72997910  | G | A | -0.293 | 0.7693 | --+-   | -44.4 | 4.156 | 4 | 0.3854  |
| rs12286604  | 11 | 118084728 | A | G | 0.293  | 0.7696 | +?+-   | 0     | 1.558 | 3 | 0.669   |
| rs66962317  | 11 | 118197486 | C | T | -0.292 | 0.7703 | -?-?+  | 0     | 0.634 | 2 | 0.7283  |
| rs67435655  | 11 | 118196399 | C | T | -0.29  | 0.7717 | -?-?+  | 0     | 0.639 | 2 | 0.7263  |
| rs1783587   | 11 | 72887612  | C | T | -0.29  | 0.772  | ++-+-  | 4.3   | 6.268 | 4 | 0.18    |
| rs11216800  | 11 | 118048885 | G | A | -0.289 | 0.7722 | +?---+ | 0     | 0.996 | 3 | 0.8022  |
| rs55843215  | 11 | 118195962 | C | T | -0.289 | 0.7722 | -?-?+  | 0     | 0.602 | 2 | 0.74    |
| rs56032119  | 11 | 118797544 | G | A | 0.285  | 0.7754 | ++-+-  | -10   | 5.453 | 4 | 0.2439  |
| rs11216816  | 11 | 118075152 | A | C | 0.285  | 0.7756 | +?+-   | 0     | 0.971 | 3 | 0.8082  |
| rs7123533   | 11 | 118049257 | G | C | -0.285 | 0.7759 | +?---+ | 0     | 0.88  | 3 | 0.8304  |
| rs639785    | 11 | 118062268 | T | C | 0.284  | 0.7762 | ++++-  | -49   | 4.028 | 4 | 0.4023  |
| rs11600901  | 11 | 118031986 | A | G | -0.284 | 0.7767 | -?+-   | 0     | 0.128 | 3 | 0.9883  |
| rs4944014   | 11 | 72527180  | T | C | -0.283 | 0.7772 | ++-+-  | 0     | 3.475 | 4 | 0.4817  |
| rs73575429  | 11 | 118797392 | C | T | 0.283  | 0.7773 | ++-+-  | -10.7 | 5.419 | 4 | 0.247   |
| rs74584888  | 11 | 118797278 | A | G | 0.283  | 0.7773 | ++-+-  | -10.9 | 5.412 | 4 | 0.2476  |
| rs59018400  | 11 | 118049811 | T | C | -0.279 | 0.7805 | +?---+ | 0     | 0.867 | 3 | 0.8335  |
| rs11216817  | 11 | 118075474 | T | C | 0.278  | 0.7812 | +?+-   | 0     | 0.986 | 3 | 0.8046  |
| rs12420093  | 11 | 118272963 | G | A | -0.278 | 0.7812 | --+-?  | -21.9 | 4.101 | 3 | 0.2507  |
| rs113566564 | 11 | 118335147 | A | G | 0.275  | 0.7831 | +?++-  | 0     | 1.956 | 3 | 0.5817  |
| rs60969913  | 11 | 118798154 | C | G | 0.274  | 0.7838 | ++-+-  | -8.9  | 5.509 | 4 | 0.2389  |
| rs111390501 | 11 | 118797420 | G | A | 0.274  | 0.7843 | ++-+-  | -10.3 | 5.439 | 4 | 0.2452  |
| rs502514    | 11 | 118241995 | C | T | -0.272 | 0.7853 | ---?+  | 37.7  | 8.028 | 3 | 0.04545 |
| rs56301948  | 11 | 118049880 | G | A | -0.272 | 0.7853 | +?---+ | 0     | 0.853 | 3 | 0.8367  |
| rs572608    | 11 | 118801640 | A | T | 0.272  | 0.7856 | -+-++  | 0     | 1.273 | 4 | 0.8659  |
| rs7342223   | 11 | 118050348 | G | T | -0.272 | 0.7858 | +?---+ | 0     | 0.852 | 3 | 0.837   |
| rs67859744  | 11 | 118200657 | A | T | -0.271 | 0.7864 | -?-?+  | 0     | 0.653 | 2 | 0.7213  |
| rs73575428  | 11 | 118797003 | G | C | 0.271  | 0.7864 | ++-+-  | -11.5 | 5.382 | 4 | 0.2503  |
| rs637737    | 11 | 118051646 | G | A | -0.27  | 0.7875 | +?---+ | 0     | 0.601 | 3 | 0.8962  |
| rs67262752  | 11 | 118047776 | C | T | -0.268 | 0.7887 | +?---+ | 0     | 0.986 | 3 | 0.8046  |
| rs1877652   | 11 | 72307742  | A | G | 0.268  | 0.789  | -?+?-  | 0     | 0.978 | 2 | 0.6132  |

|             |    |           |   |   |        |        |       |       |        |   |         |
|-------------|----|-----------|---|---|--------|--------|-------|-------|--------|---|---------|
| rs79820203  | 11 | 118051010 | C | T | -0.265 | 0.791  | +?--+ | 0     | 0.873  | 3 | 0.8319  |
| rs75459003  | 11 | 118053859 | C | A | -0.263 | 0.7927 | +?--+ | 0     | 0.954  | 3 | 0.8123  |
| rs3802866   | 11 | 118095803 | T | C | 0.261  | 0.7944 | +?+-  | 0     | 1.786  | 3 | 0.618   |
| rs7927676   | 11 | 118051323 | G | C | -0.26  | 0.7946 | +?--+ | 0     | 0.882  | 3 | 0.8298  |
| rs74395230  | 11 | 118052662 | T | C | -0.259 | 0.7957 | +?--+ | 0     | 0.923  | 3 | 0.8199  |
| rs78312641  | 11 | 118749318 | A | T | 0.258  | 0.7968 | ++++  | 0.1   | 6.008  | 4 | 0.1986  |
| rs76831657  | 11 | 118051082 | G | A | -0.257 | 0.7971 | +?--+ | 0     | 0.918  | 3 | 0.8212  |
| rs7943511   | 11 | 118096165 | T | C | 0.257  | 0.7973 | +?+-  | 0     | 1.793  | 3 | 0.6164  |
| rs1613495   | 11 | 118017645 | T | C | 0.257  | 0.7975 | -?+-  | 0     | 0.873  | 3 | 0.832   |
| rs11216791  | 11 | 118044360 | G | A | -0.254 | 0.7992 | +?--+ | 0     | 1.091  | 3 | 0.7792  |
| rs76050019  | 11 | 118051857 | C | T | -0.254 | 0.7993 | +?--+ | 0     | 0.868  | 3 | 0.8331  |
| rs10898885  | 11 | 72571275  | T | C | -0.252 | 0.8011 | ++--  | 0     | 2.662  | 4 | 0.616   |
| rs12295676  | 11 | 118054345 | A | G | -0.251 | 0.8016 | +?--+ | 0     | 0.949  | 3 | 0.8136  |
| rs12295438  | 11 | 118094921 | T | C | 0.25   | 0.8024 | +?+-  | 0     | 1.791  | 3 | 0.6168  |
| rs7943272   | 11 | 118096028 | C | A | 0.25   | 0.8025 | +?+-  | 0     | 1.813  | 3 | 0.6122  |
| rs583490    | 11 | 118022608 | A | G | -0.249 | 0.8037 | ++--  | 0     | 3.668  | 4 | 0.4528  |
| rs678262    | 11 | 118021740 | G | C | -0.248 | 0.8042 | ++--  | -44.9 | 4.14   | 4 | 0.3874  |
| rs147710683 | 11 | 118121356 | T | C | -0.247 | 0.8049 | -?--+ | 0     | 2.884  | 3 | 0.4098  |
| rs113521822 | 11 | 118063349 | G | A | 0.246  | 0.8058 | +?--+ | 0     | 0.695  | 3 | 0.8743  |
| rs566416    | 11 | 118759610 | G | T | -0.241 | 0.8093 | +-+-- | 59.3  | 14.754 | 4 | 0.00524 |
| rs7926717   | 11 | 118121399 | T | G | 0.241  | 0.8098 | +?+-  | 0     | 1.648  | 3 | 0.6486  |
| rs12577841  | 11 | 118194599 | T | C | -0.23  | 0.8178 | ++--  | 0     | 0.58   | 4 | 0.9653  |
| rs676925    | 11 | 118765688 | G | C | -0.23  | 0.8179 | +-+-- | 50.1  | 12.021 | 4 | 0.01719 |
| rs58507982  | 11 | 118146510 | T | C | -0.23  | 0.818  | -?+?- | 0     | 1.271  | 2 | 0.5297  |
| rs6592474   | 11 | 72184290  | A | T | 0.229  | 0.8191 | ++--  | -9.2  | 5.495  | 4 | 0.2402  |
| rs7934292   | 11 | 118059914 | C | T | -0.228 | 0.8197 | +?--+ | 0     | 0.944  | 3 | 0.8149  |
| rs642765    | 11 | 118030310 | C | G | -0.228 | 0.8199 | -?+-  | 0     | 0.174  | 3 | 0.9816  |
| rs11608072  | 11 | 118030086 | C | G | -0.227 | 0.8206 | +?+-  | 0     | 0.198  | 3 | 0.9779  |
| rs11216781  | 11 | 118012310 | A | G | 0.226  | 0.8209 | ++++  | 0     | 0.922  | 4 | 0.9213  |
| rs11216824  | 11 | 118096818 | A | G | 0.22   | 0.8262 | +?+-  | 0     | 1.621  | 3 | 0.6547  |
| rs7103366   | 11 | 118057867 | G | T | 0.218  | 0.8272 | ++++  | -47.2 | 4.076  | 4 | 0.3958  |
| rs7935492   | 11 | 118056823 | T | C | -0.217 | 0.828  | +?--+ | 0     | 0.919  | 3 | 0.8209  |
| rs145968026 | 11 | 118421841 | G | C | 0.217  | 0.8286 | +?+-  | 0     | 0.745  | 3 | 0.8627  |
| rs11216821  | 11 | 118088362 | C | T | 0.214  | 0.8306 | +?+-  | 0     | 1.621  | 3 | 0.6547  |
| rs12282334  | 11 | 118057783 | G | C | -0.214 | 0.8306 | +?--+ | 0     | 0.911  | 3 | 0.8227  |
| rs2365774   | 11 | 72308203  | G | A | 0.213  | 0.8314 | -?+?- | 0     | 0.819  | 2 | 0.664   |
| rs2276064   | 11 | 118529703 | A | G | -0.211 | 0.8328 | +-??  | -53.8 | 2.601  | 2 | 0.2724  |
| rs598746    | 11 | 118020057 | A | G | -0.208 | 0.835  | -?++  | 0     | 0.927  | 3 | 0.819   |
| rs10892311  | 11 | 118807735 | T | C | 0.206  | 0.8365 | ++--  | 0     | 1.511  | 4 | 0.8246  |
| rs642936    | 11 | 118019906 | C | T | -0.204 | 0.8383 | ++--  | 0     | 2.509  | 4 | 0.6431  |
| rs12808254  | 11 | 118066912 | T | C | -0.204 | 0.8385 | +?+-  | 7.1   | 5.385  | 3 | 0.1457  |
| rs79699220  | 11 | 118550841 | C | G | 0.204  | 0.8386 | +?++  | 0     | 0.927  | 3 | 0.8189  |
| rs4245414   | 11 | 72188466  | A | G | 0.203  | 0.8393 | ++--  | -4.1  | 5.765  | 4 | 0.2174  |
| rs73615909  | 11 | 118322488 | T | C | 0.202  | 0.8398 | +?+-  | 0     | 1.443  | 3 | 0.6956  |
| rs12418805  | 11 | 72188979  | C | T | 0.2    | 0.8413 | ++--  | -3.9  | 5.772  | 4 | 0.2168  |
| rs76248354  | 11 | 118042606 | A | G | -0.2   | 0.8417 | -?++  | 25.6  | 6.72   | 3 | 0.08139 |
| rs116979688 | 11 | 118032223 | T | C | 0.199  | 0.8419 | ++??  | 0     | 0.001  | 1 | 0.9778  |
| rs12284089  | 11 | 118058542 | T | C | -0.198 | 0.8433 | +?--+ | 0     | 0.999  | 3 | 0.8015  |
| rs7939622   | 11 | 118087841 | A | G | 0.198  | 0.8433 | +?+-  | 0     | 1.635  | 3 | 0.6515  |
| rs12271064  | 11 | 118119211 | G | A | 0.196  | 0.8448 | +?+-  | 0     | 1.986  | 3 | 0.5753  |
| rs593753    | 11 | 72691440  | T | C | -0.194 | 0.8465 | +++-  | 0     | 3.636  | 4 | 0.4575  |
| rs602594    | 11 | 118040610 | T | C | 0.19   | 0.8489 | +?--+ | 0     | 0.401  | 3 | 0.9401  |
| rs4943910   | 11 | 72188643  | T | C | 0.19   | 0.849  | ++--  | -4.9  | 5.72   | 4 | 0.2211  |
| rs6589652   | 11 | 118058358 | G | A | 0.19   | 0.8493 | ++++  | 0     | 3.881  | 4 | 0.4223  |
| rs4274214   | 11 | 72188003  | T | C | 0.188  | 0.8513 | ++--  | -6.2  | 5.651  | 4 | 0.2268  |
| rs11607671  | 11 | 72192738  | T | C | 0.185  | 0.853  | ++--  | -5.9  | 5.663  | 4 | 0.2258  |

|             |    |           |   |   |        |        |       |       |        |   |          |
|-------------|----|-----------|---|---|--------|--------|-------|-------|--------|---|----------|
| rs11607688  | 11 | 72192830  | T | C | 0.178  | 0.8588 | ++--  | -6.5  | 5.631  | 4 | 0.2284   |
| rs17310153  | 11 | 72190863  | G | A | 0.178  | 0.8591 | ++--  | -6.4  | 5.641  | 4 | 0.2276   |
| rs75403174  | 11 | 118043904 | A | C | -0.178 | 0.8591 | +?--+ | 0     | 1.324  | 3 | 0.7235   |
| rs2365385   | 11 | 72194718  | A | G | 0.177  | 0.8597 | ++--  | -5.8  | 5.672  | 4 | 0.225    |
| rs11600727  | 11 | 72201499  | C | A | -0.176 | 0.8601 | ++--  | 22.8  | 7.771  | 4 | 0.1004   |
| rs12289120  | 11 | 118066609 | T | C | 0.173  | 0.8629 | +?+-  | 0     | 0.386  | 3 | 0.9431   |
| rs11216792  | 11 | 118044450 | T | G | -0.173 | 0.863  | +?--+ | 0     | 1.31   | 3 | 0.7268   |
| rs679327    | 11 | 118042974 | G | A | 0.172  | 0.8636 | +?+++ | 0     | 0.028  | 3 | 0.9988   |
| rs9332781   | 11 | 118346599 | G | A | 0.171  | 0.8641 | +?+-  | 0     | 1.644  | 3 | 0.6495   |
| rs45508093  | 11 | 118224059 | G | A | 0.17   | 0.8647 | -?++  | 0     | 0.308  | 2 | 0.8573   |
| rs1783570   | 11 | 72871654  | A | G | -0.168 | 0.8666 | +++-  | 12.1  | 6.83   | 4 | 0.1452   |
| rs6589651   | 11 | 118058156 | G | A | 0.166  | 0.8684 | ++++  | 0     | 3.969  | 4 | 0.4103   |
| rs11216790  | 11 | 118044144 | T | G | -0.166 | 0.8685 | +?--+ | 0     | 1.324  | 3 | 0.7234   |
| rs12418930  | 11 | 72681566  | T | C | -0.164 | 0.8697 | ++++  | 35.4  | 9.293  | 4 | 0.05417  |
| rs598207    | 11 | 118765267 | C | G | 0.163  | 0.8706 | +?+-  | 57.2  | 11.676 | 3 | 0.008581 |
| rs656308    | 11 | 118031206 | T | G | -0.162 | 0.8713 | -?+-  | 0     | 0.227  | 3 | 0.9731   |
| rs7941217   | 11 | 118349247 | T | C | 0.161  | 0.8721 | +?+-  | 0     | 1.568  | 3 | 0.6666   |
| rs73557344  | 11 | 118810054 | C | G | 0.159  | 0.8736 | ++++  | -33.3 | 4.502  | 4 | 0.3423   |
| rs12420153  | 11 | 72195852  | A | G | 0.155  | 0.8766 | ++--  | -9.5  | 5.481  | 4 | 0.2414   |
| rs75460330  | 11 | 118809767 | A | G | 0.15   | 0.881  | ++++  | -32.5 | 4.527  | 4 | 0.3394   |
| rs663003    | 11 | 118823148 | T | C | 0.148  | 0.8824 | -?++  | 9.6   | 5.53   | 3 | 0.1368   |
| rs10892222  | 11 | 118041102 | A | G | -0.145 | 0.8846 | +?--+ | 0     | 1.869  | 3 | 0.5999   |
| rs1624780   | 11 | 118134785 | T | G | -0.145 | 0.8849 | +?--  | 13.7  | 4.633  | 2 | 0.09861  |
| rs11608057  | 11 | 118030185 | T | C | -0.143 | 0.8865 | +++-  | 0     | 0.257  | 4 | 0.9924   |
| rs4553405   | 11 | 118061798 | T | C | 0.138  | 0.8905 | ++++  | -33.9 | 4.48   | 4 | 0.3449   |
| rs8192614   | 11 | 118037564 | A | G | -0.137 | 0.8911 | -?+-  | 0     | 0.203  | 3 | 0.9771   |
| rs56027064  | 11 | 72563104  | G | T | 0.136  | 0.8915 | +++-  | 0     | 1.538  | 4 | 0.8199   |
| rs59069289  | 11 | 118802128 | T | G | -0.134 | 0.8931 | ++++  | -36.6 | 4.391  | 4 | 0.3557   |
| rs59480472  | 11 | 118802386 | C | T | -0.134 | 0.8933 | ++++  | -36.7 | 4.39   | 4 | 0.3558   |
| rs600325    | 11 | 118041133 | C | T | 0.132  | 0.8948 | +?--+ | 0     | 0.336  | 3 | 0.9531   |
| rs111313044 | 11 | 118803596 | A | G | -0.126 | 0.8999 | ++++  | -31.7 | 4.556  | 4 | 0.3359   |
| rs73575440  | 11 | 118803160 | A | G | -0.124 | 0.9011 | ++++  | -34.3 | 4.466  | 4 | 0.3466   |
| rs2298831   | 11 | 118068752 | C | T | 0.123  | 0.902  | +?+-  | 0     | 0.515  | 3 | 0.9156   |
| rs724673    | 11 | 72795708  | A | G | 0.122  | 0.9029 | ++++  | 30.6  | 8.649  | 4 | 0.07051  |
| rs4936424   | 11 | 118009674 | T | C | 0.121  | 0.9037 | ++--  | 22.3  | 7.72   | 4 | 0.1024   |
| rs2017122   | 11 | 118314849 | T | C | 0.115  | 0.9081 | +?+-  | 0     | 2.843  | 3 | 0.4165   |
| rs12294669  | 11 | 118041972 | G | A | -0.113 | 0.9098 | +?--+ | 0     | 1.958  | 3 | 0.5811   |
| rs73555296  | 11 | 118445559 | T | G | 0.112  | 0.9108 | +?+-  | 0     | 0.549  | 3 | 0.9081   |
| rs4943907   | 11 | 72183348  | T | C | -0.112 | 0.911  | ++--  | 13.4  | 6.925  | 4 | 0.1399   |
| rs651825    | 11 | 118042713 | G | T | 0.111  | 0.9118 | +?++  | 0     | 0.53   | 3 | 0.9123   |
| rs2003368   | 11 | 72840106  | T | C | -0.11  | 0.9121 | ++++  | 37.1  | 9.537  | 4 | 0.04899  |
| rs145762171 | 11 | 118748789 | A | G | 0.109  | 0.9132 | +?--+ | 0     | 2.639  | 3 | 0.4507   |
| rs150339153 | 11 | 118285369 | T | C | -0.109 | 0.9132 | -?--+ | 0     | 1.679  | 3 | 0.6416   |
| rs611960    | 11 | 118034228 | G | T | 0.104  | 0.917  | -?+-  | 0     | 0.505  | 3 | 0.9177   |
| rs60798124  | 11 | 118282241 | G | A | 0.102  | 0.9188 | +++-- | 0     | 3.44   | 4 | 0.487    |
| rs611979    | 11 | 118034223 | A | G | 0.101  | 0.9197 | -?+-  | 0     | 0.502  | 3 | 0.9184   |
| rs7948661   | 11 | 118341649 | C | T | 0.098  | 0.9218 | +?+-  | 0     | 1.673  | 3 | 0.6428   |
| rs72969876  | 11 | 72589778  | C | G | 0.096  | 0.9231 | +++-  | 0     | 1.682  | 4 | 0.7939   |
| rs3765638   | 11 | 72537072  | A | G | -0.095 | 0.9244 | ++++  | 18.9  | 7.398  | 4 | 0.1163   |
| rs76651078  | 11 | 118316006 | A | G | 0.092  | 0.9264 | +?+-  | -63.9 | 3.051  | 3 | 0.3838   |
| rs10892221  | 11 | 118040642 | A | G | -0.086 | 0.9318 | +?--+ | 0     | 2.01   | 3 | 0.5704   |
| rs59489957  | 11 | 118284984 | T | C | 0.086  | 0.9318 | +++-- | 0     | 3.475  | 4 | 0.4816   |
| rs180884425 | 11 | 118620195 | C | T | 0.084  | 0.9334 | ++??  | 0     | 0.065  | 2 | 0.9682   |
| rs74422681  | 11 | 118312870 | G | A | 0.083  | 0.9335 | +++-  | -34.6 | 4.458  | 4 | 0.3476   |
| rs61010648  | 11 | 118206890 | G | C | -0.077 | 0.9384 | -?-?+ | 0     | 1.058  | 2 | 0.5893   |
| rs678957    | 11 | 118050855 | T | C | -0.077 | 0.9385 | +?+-  | 0     | 0.439  | 3 | 0.9321   |

|             |    |           |   |   |        |        |       |       |       |   |         |
|-------------|----|-----------|---|---|--------|--------|-------|-------|-------|---|---------|
| rs56296109  | 11 | 118698170 | A | C | -0.075 | 0.9404 | -?+-- | 17.5  | 6.064 | 3 | 0.1085  |
| rs594171    | 11 | 118032974 | A | T | 0.069  | 0.9452 | -?-+- | 0     | 0.669 | 3 | 0.8805  |
| rs645451    | 11 | 118025969 | T | C | 0.067  | 0.9463 | -?+?- | 0     | 0.235 | 2 | 0.8891  |
| rs1616199   | 11 | 118146462 | T | C | 0.065  | 0.948  | +--?+ | -26   | 3.969 | 3 | 0.2649  |
| rs7933243   | 11 | 118403205 | G | T | 0.063  | 0.9496 | +--+? | -43.3 | 3.49  | 3 | 0.3221  |
| rs11216807  | 11 | 118063030 | C | T | -0.058 | 0.9534 | ++++- | 0     | 3.852 | 4 | 0.4264  |
| rs11235620  | 11 | 72680931  | T | A | 0.058  | 0.9534 | +++-- | 0     | 3.41  | 4 | 0.4917  |
| rs876479    | 11 | 118028094 | T | C | -0.055 | 0.9563 | -?-?+ | 0     | 0.97  | 2 | 0.6156  |
| rs61581699  | 11 | 118045423 | A | G | -0.054 | 0.9567 | +?--+ | 0     | 0.656 | 3 | 0.8834  |
| rs61900157  | 11 | 118824439 | C | A | 0.053  | 0.9575 | -?-++ | 7.9   | 5.428 | 3 | 0.143   |
| rs11603160  | 11 | 72894273  | T | C | 0.053  | 0.9578 | -?++? | 0     | 1.179 | 2 | 0.5546  |
| rs628299    | 11 | 118018022 | G | A | -0.048 | 0.9618 | +---- | 0     | 2.977 | 4 | 0.5617  |
| rs3018386   | 11 | 118016622 | G | C | -0.045 | 0.964  | +---- | 0     | 2.76  | 4 | 0.5987  |
| rs10790244  | 11 | 118059557 | C | T | 0.045  | 0.9643 | ++++- | -44.4 | 4.155 | 4 | 0.3855  |
| rs73575454  | 11 | 118807639 | A | G | -0.044 | 0.9647 | +---- | -26.3 | 4.749 | 4 | 0.314   |
| rs11216806  | 11 | 118060549 | C | T | 0.042  | 0.9662 | ++++- | -1.5  | 5.914 | 4 | 0.2057  |
| rs11217096  | 11 | 118796570 | T | C | -0.041 | 0.9675 | -+++  | 0     | 1.645 | 4 | 0.8006  |
| rs11216794  | 11 | 118044740 | A | T | -0.041 | 0.9677 | +?--+ | 0     | 0.699 | 3 | 0.8735  |
| rs17122154  | 11 | 118273019 | A | G | -0.039 | 0.9692 | +++-- | 0     | 3.316 | 4 | 0.5065  |
| rs7103918   | 11 | 118061480 | T | C | 0.033  | 0.9734 | ++++- | 0     | 3.868 | 4 | 0.4242  |
| rs458360    | 11 | 72319522  | A | C | 0.033  | 0.9739 | -?+?- | -5.6  | 3.789 | 2 | 0.1504  |
| rs462491    | 11 | 72319520  | C | T | 0.033  | 0.9739 | -?+?- | -5.6  | 3.789 | 2 | 0.1504  |
| rs4936426   | 11 | 118134597 | C | T | -0.031 | 0.9756 | +?+?- | 25.7  | 5.381 | 2 | 0.06785 |
| rs6589663   | 11 | 118255278 | A | G | -0.031 | 0.9756 | +++-- | 0     | 3.334 | 4 | 0.5035  |
| rs625291    | 11 | 118826060 | T | C | 0.029  | 0.977  | -?-++ | 13.4  | 5.776 | 3 | 0.123   |
| rs73575441  | 11 | 118804919 | C | T | -0.027 | 0.9783 | +---- | -22.3 | 4.907 | 4 | 0.297   |
| rs666191    | 11 | 118826063 | A | G | 0.027  | 0.9788 | -?-++ | 15.2  | 5.895 | 3 | 0.1168  |
| rs11216867  | 11 | 118262407 | G | A | -0.024 | 0.9806 | +++-- | 0     | 3.361 | 4 | 0.4993  |
| rs56933877  | 11 | 118804643 | A | G | -0.02  | 0.9838 | +---- | -21.7 | 4.93  | 4 | 0.2945  |
| rs341085    | 11 | 72318882  | A | C | 0.02   | 0.9844 | -?+?- | -7.6  | 3.717 | 2 | 0.1559  |
| rs17122150  | 11 | 118271860 | G | C | -0.017 | 0.9863 | +++-- | 0     | 3.459 | 4 | 0.4842  |
| rs2097131   | 11 | 118825069 | A | G | 0.016  | 0.9871 | -?-++ | 7     | 5.375 | 3 | 0.1463  |
| rs1793170   | 11 | 118150205 | C | T | 0.014  | 0.9884 | +--?+ | -24.2 | 4.025 | 3 | 0.2588  |
| rs11235641  | 11 | 72755766  | A | G | -0.011 | 0.9912 | -+++  | 26.4  | 8.151 | 4 | 0.08619 |
| rs7121764   | 11 | 118271759 | G | A | 0.007  | 0.9945 | +++-- | 0     | 3.323 | 4 | 0.5053  |
| rs939274    | 11 | 118134065 | T | G | -0.007 | 0.9946 | +?+?- | 22.8  | 5.183 | 2 | 0.07491 |
| rs112045567 | 11 | 118804989 | G | A | 0.006  | 0.9953 | +---- | -19.4 | 5.025 | 4 | 0.2847  |
| rs586053    | 11 | 118020568 | A | G | 0.005  | 0.9957 | -?++- | 0     | 1.122 | 3 | 0.7717  |
| rs4426142   | 11 | 118824996 | A | G | -0.002 | 0.9988 | -?-++ | 10.2  | 5.571 | 3 | 0.1345  |



|    |           |              |   |   |   |         |             |   |              |
|----|-----------|--------------|---|---|---|---------|-------------|---|--------------|
| 11 | 118605617 | rs10892275   | A | T | M | Disease | 0.920926323 | M | Disease&NULL |
| 11 | 118605463 | rs10892274   | T | C | M | Disease | 0.920561451 | M | Disease&NULL |
| 11 | 116287909 | rs10891973   | A | G | M | Disease | 0.919827088 | M | Disease&NULL |
| 11 | 116287783 | rs10891972   | T | C | M | Disease | 0.919086533 | M | Disease&NULL |
| 11 | 118604941 | rs11216999   | C | T | M | Disease | 0.913725806 | M | Disease&NULL |
| 11 | 118604837 | rs11216998   | T | C | M | Disease | 0.910926472 | M | Disease&NULL |
| 11 | 118725942 | rs11217063   | C | G | M | Disease | 0.902031196 | M | Disease&NULL |
| 11 | 118726647 | rs11217065   | C | T | M | Disease | 0.900249511 | M | Disease&NULL |
| 11 | 118724723 | rs57719838   | C | T | M | Disease | 0.898439072 | M | Disease&NULL |
| 11 | 118723379 | rs7103067    | A | G | M | Disease | 0.898439072 | M | Disease&NULL |
| 11 | 118612565 | rs6589686    | A | G | M | Disease | 0.896135084 | M | Disease&NULL |
| 11 | 118731599 | rs34561290   | T | C | M | Disease | 0.896135084 | M | Disease&NULL |
| 11 | 118731762 | rs11217072   | G | A | M | Disease | 0.896135084 | M | Disease&NULL |
| 11 | 118729583 | rs12790489   | C | T | M | Disease | 0.892352574 | M | Disease&NULL |
| 11 | 118727169 | rs10790267   | T | C | M | Disease | 0.891871333 | M | Disease&NULL |
| 11 | 118729860 | rs11217070   | G | T | M | Disease | 0.890903179 | M | Disease&NULL |
| 11 | 118730141 | rs7929520    | G | A | M | Disease | 0.890903179 | M | Disease&NULL |
| 11 | 118729210 | rs10892300   | T | C | M | Disease | 0.890416255 | M | Disease&NULL |
| 11 | 118727332 | rs11217067   | T | G | M | Disease | 0.888944033 | M | Disease&NULL |
| 11 | 118740180 | rs7483509    | A | G | M | Disease | 0.883397031 | M | Disease&NULL |
| 11 | 118728320 | rs4936442    | T | C | M | Disease | 0.880271111 | M | Disease&NULL |
| 11 | 118734521 | rs1174717189 | T | A | M | Disease | 0.878681162 | M | Disease&NULL |
| 11 | 118762701 | rs76457018   | A | G | M | Disease | 0.875446642 | M | Disease&NULL |
| 11 | 117489521 | rs666094     | C | T | M | Disease | 0.868184382 | M | Disease&NULL |
| 11 | 118711790 | rs622722     | A | G | M | Disease | 0.861165006 | M | Disease&NULL |
| 11 | 118758089 | rs497916     | T | C | M | Disease | 0.861165006 | M | Disease&NULL |
| 11 | 119537683 | rs10790329   | C | T | M | Disease | 0.858148935 | M | Disease&NULL |
| 11 | 118603165 | rs73001429   | G | T | M | Disease | 0.855696866 | M | Disease&NULL |
| 11 | 118603520 | rs11216994   | T | C | M | Disease | 0.85383477  | M | Disease&NULL |
| 11 | 118603526 | rs11216995   | A | G | M | Disease | 0.84941242  | M | Disease&NULL |
| 11 | 118603495 | rs11216993   | A | T | M | Disease | 0.845534735 | M | Disease&NULL |
| 11 | 117288387 | rs579411     | A | G | M | Disease | 0.843565479 | M | Disease&NULL |
| 11 | 117288898 | rs553906     | G | T | M | Disease | 0.843565479 | M | Disease&NULL |
| 11 | 117289347 | rs10790181   | G | A | M | Disease | 0.843565479 | M | Disease&NULL |
| 11 | 117286824 | rs2124975    | G | A | M | Disease | 0.842904531 | M | Disease&NULL |
| 11 | 117287088 | rs2368164    | C | T | M | Disease | 0.842904531 | M | Disease&NULL |
| 11 | 117287230 | rs2925767    | A | G | M | Disease | 0.842904531 | M | Disease&NULL |
| 11 | 117287272 | rs2510451    | G | C | M | Disease | 0.842904531 | M | Disease&NULL |
| 11 | 117260504 | rs523159     | A | G | M | Disease | 0.842241313 | M | Disease&NULL |
| 11 | 117285907 | rs524069     | G | A | M | Disease | 0.841575821 | M | Disease&NULL |
| 11 | 117286064 | rs522383     | T | C | M | Disease | 0.841575821 | M | Disease&NULL |
| 11 | 117287942 | rs473446     | A | G | M | Disease | 0.841575821 | M | Disease&NULL |
| 11 | 117285619 | rs512356     | A | G | M | Disease | 0.840908052 | M | Disease&NULL |
| 11 | 118602707 | rs10892272   | G | C | M | Disease | 0.840238003 | M | Disease&NULL |
| 11 | 118602809 | rs10892273   | A | G | M | Disease | 0.839565667 | M | Disease&NULL |
| 11 | 117272939 | rs1270801    | T | G | M | Disease | 0.83889105  | M | Disease&NULL |
| 11 | 118604638 | rs11216997   | T | C | M | Disease | 0.837534937 | M | Disease&NULL |
| 11 | 118603736 | rs112561833  | C | A | M | Disease | 0.836853438 | M | Disease&NULL |
| 11 | 117290313 | rs493647     | G | A | M | Disease | 0.833411386 | M | Disease&NULL |
| 11 | 117475052 | rs490914     | T | A | M | Disease | 0.829911475 | M | Disease&NULL |
| 11 | 117285549 | rs527056     | G | A | M | Disease | 0.829911475 | M | Disease&NULL |
| 11 | 117285684 | rs511549     | C | A | M | Disease | 0.829911475 | M | Disease&NULL |
| 11 | 117285738 | rs11823544   | A | G | M | Disease | 0.829911475 | M | Disease&NULL |
| 11 | 118558425 | rs149509653  | A | G | M | Disease | 0.827783608 | M | Disease&NULL |
| 11 | 117285497 | rs513327     | C | T | M | Disease | 0.82706965  | M | Disease&NULL |
| 11 | 117375461 | rs2276341    | A | G | M | Disease | 0.826353353 | M | Disease&NULL |
| 11 | 118685481 | rs515707     | T | C | M | Disease | 0.826353353 | M | Disease&NULL |
| 11 | 117373947 | rs4938394    | C | T | M | Disease | 0.825634714 | M | Disease&NULL |
| 11 | 117290898 | rs4936374    | A | G | M | Disease | 0.824913732 | M | Disease&NULL |
| 11 | 118689871 | rs587816     | A | C | M | Disease | 0.824190403 | M | Disease&NULL |
| 11 | 117475341 | rs680292     | T | G | M | Disease | 0.823464725 | M | Disease&NULL |
| 11 | 118690550 | rs577121     | C | T | M | Disease | 0.819061207 | M | Disease&NULL |
| 11 | 118598544 | rs10892271   | A | G | M | Disease | 0.816827559 | M | Disease&NULL |
| 11 | 118608532 | rs567680     | G | C | M | Disease | 0.816827559 | M | Disease&NULL |
| 11 | 118607622 | rs11217004   | A | G | M | Disease | 0.816078273 | M | Disease&NULL |
| 11 | 117289951 | rs490730     | T | C | M | Disease | 0.816078273 | M | Disease&NULL |
| 11 | 118613235 | rs632124     | A | T | M | Disease | 0.815326614 | M | Disease&NULL |
| 11 | 117375951 | rs10892132   | A | G | M | Disease | 0.815326614 | M | Disease&NULL |
| 11 | 117378116 | rs2155394    | A | G | M | Disease | 0.814572581 | M | Disease&NULL |
| 11 | 120492260 | rs77694974   | T | G | M | Disease | 0.814572581 | M | Disease&NULL |
| 11 | 118608625 | rs566733     | G | C | M | Disease | 0.813816172 | M | Disease&NULL |
| 11 | 118682462 | rs523148     | T | C | M | Disease | 0.813057386 | M | Disease&NULL |
| 11 | 117373125 | rs7932097    | T | C | M | Disease | 0.805338416 | M | Disease&NULL |
| 11 | 117373432 | rs7112940    | G | A | M | Disease | 0.802976114 | M | Disease&NULL |
| 11 | 119210583 | rs1135258    | T | G | M | Disease | 0.798186778 | M | Disease&NULL |
| 11 | 116523821 | rs528647     | T | C | M | Disease | 0.797380154 | M | Disease&NULL |
| 11 | 118696175 | rs584935     | A | G | M | Disease | 0.797380154 | M | Disease&NULL |
| 11 | 118759610 | rs566416     | G | T | M | Disease | 0.796571127 | M | Disease&NULL |
| 11 | 116523167 | rs483747     | C | T | M | Disease | 0.796571127 | M | Disease&NULL |
| 11 | 116522559 | rs567576     | G | A | M | Disease | 0.796571127 | M | Disease&NULL |
| 11 | 116522565 | rs567599     | T | G | M | Disease | 0.796571127 | M | Disease&NULL |
| 11 | 118695908 | rs583905     | G | A | M | Disease | 0.795759698 | M | Disease&NULL |
| 11 | 118151329 | rs11216843   | T | A | M | Disease | 0.795759698 | M | Disease&NULL |
| 11 | 116522625 | rs3017237    | C | G | M | Disease | 0.794945865 | M | Disease&NULL |
| 11 | 116522770 | rs480028     | G | C | M | Disease | 0.794945865 | M | Disease&NULL |
| 11 | 116522854 | rs480878     | A | G | M | Disease | 0.794945865 | M | Disease&NULL |
| 11 | 116523844 | rs528732     | A | G | M | Disease | 0.794945865 | M | Disease&NULL |
| 11 | 116523931 | rs3017778    | T | C | M | Disease | 0.793310987 | M | Disease&NULL |
| 11 | 118617299 | rs607125     | C | T | M | Disease | 0.793310987 | M | Disease&NULL |
| 11 | 118620697 | rs488219     | C | T | M | Disease | 0.790012373 | M | Disease&NULL |
| 11 | 118700264 | rs113641235  | T | C | M | Disease | 0.790012373 | M | Disease&NULL |
| 11 | 116523988 | rs3017779    | T | C | M | Disease | 0.790012373 | M | Disease&NULL |
| 11 | 116523373 | rs485638     | C | G | M | Disease | 0.790012373 | M | Disease&NULL |
| 11 | 117201458 | rs76858861   | G | A | M | Disease | 0.790012373 | M | Disease&NULL |
| 11 | 118624250 | rs546393     | C | T | M | Disease | 0.789181707 | M | Disease&NULL |
| 11 | 116636305 | rs79874233   | C | G | M | Disease | 0.789181707 | M | Disease&NULL |

|    |           |              |   |   |  |       |           |           |       |             |
|----|-----------|--------------|---|---|--|-------|-----------|-----------|-------|-------------|
| 11 | 118605617 | rs10892275   | A | T |  | 1.127 | -7977.388 | -7972.481 | 4.908 | 0.000523624 |
| 11 | 118605463 | rs10892274   | T | C |  | 1.127 | -7977.388 | -7972.492 | 4.896 | 0.000517378 |
| 11 | 116287909 | rs10891973   | A | G |  | 1.153 | -7977.388 | -7972.507 | 4.882 | 0.000510185 |
| 11 | 116287783 | rs10891972   | T | C |  | 1.152 | -7977.388 | -7972.531 | 4.858 | 0.000498086 |
| 11 | 118604941 | rs11216999   | C | T |  | 1.125 | -7977.388 | -7972.667 | 4.722 | 0.000434751 |
| 11 | 118604837 | rs11216998   | T | C |  | 1.124 | -7977.388 | -7972.738 | 4.65  | 0.000404549 |
| 11 | 118725942 | rs11217063   | C | G |  | 0.9   | -7977.388 | -7972.952 | 4.436 | 0.000326612 |
| 11 | 118726647 | rs11217065   | C | T |  | 0.901 | -7977.388 | -7972.987 | 4.401 | 0.000315378 |
| 11 | 118724723 | rs57719838   | C | T |  | 0.901 | -7977.388 | -7973.026 | 4.362 | 0.000303315 |
| 11 | 118723379 | rs7103067    | A | G |  | 0.901 | -7977.388 | -7973.028 | 4.36  | 0.000302709 |
| 11 | 118612565 | rs6589686    | A | G |  | 1.136 | -7977.388 | -7973.077 | 4.312 | 0.000288523 |
| 11 | 118731599 | rs34561290   | T | C |  | 0.901 | -7977.388 | -7973.082 | 4.306 | 0.000286797 |
| 11 | 118731762 | rs11217072   | G | A |  | 0.901 | -7977.388 | -7973.082 | 4.306 | 0.000286797 |
| 11 | 118729583 | rs12790489   | C | T |  | 0.902 | -7977.388 | -7973.162 | 4.226 | 0.000264747 |
| 11 | 118727169 | rs10790267   | T | C |  | 0.902 | -7977.388 | -7973.169 | 4.219 | 0.0002629   |
| 11 | 118729860 | rs11217070   | G | T |  | 0.902 | -7977.388 | -7973.187 | 4.201 | 0.00025821  |
| 11 | 118730141 | rs7929520    | G | A |  | 0.902 | -7977.388 | -7973.187 | 4.201 | 0.00025821  |
| 11 | 118729210 | rs10892300   | T | C |  | 0.902 | -7977.388 | -7973.204 | 4.184 | 0.000235858 |
| 11 | 118727332 | rs11217067   | T | G |  | 0.902 | -7977.388 | -7973.234 | 4.154 | 0.000246355 |
| 11 | 118740180 | rs7483509    | A | G |  | 0.903 | -7977.388 | -7973.343 | 4.046 | 0.000221135 |
| 11 | 118728320 | rs4936442    | T | C |  | 0.904 | -7977.388 | -7973.396 | 3.992 | 0.00020951  |
| 11 | 118734521 | rs1174717189 | T | A |  | 0.904 | -7977.388 | -7973.434 | 3.954 | 0.000201698 |
| 11 | 118762701 | rs76457018   | A | G |  | 0.872 | -7977.388 | -7973.493 | 3.895 | 0.000190142 |
| 11 | 117489521 | rs666094     | C | T |  | 0.907 | -7977.388 | -7973.624 | 3.764 | 0.000166796 |
| 11 | 118711790 | rs622722     | A | G |  | 0.906 | -7977.388 | -7973.741 | 3.648 | 0.000148528 |
| 11 | 118758089 | rs497916     | T | C |  | 1.113 | -7977.388 | -7973.743 | 3.645 | 0.000148083 |
| 11 | 119537683 | rs10790329   | C | T |  | 1.114 | -7977.388 | -7973.794 | 3.594 | 0.000140762 |
| 11 | 118603165 | rs73001429   | G | T |  | 1.12  | -7977.388 | -7973.835 | 3.553 | 0.000150567 |
| 11 | 118603520 | rs11216994   | T | C |  | 1.12  | -7977.388 | -7973.857 | 3.532 | 0.000132226 |
| 11 | 118603526 | rs11216995   | A | G |  | 1.119 | -7977.388 | -7973.93  | 3.459 | 0.000122949 |
| 11 | 118603495 | rs11216993   | A | T |  | 1.119 | -7977.388 | -7973.99  | 3.398 | 0.000115674 |
| 11 | 117288387 | rs579411     | A | G |  | 0.851 | -7977.388 | -7974.024 | 3.364 | 0.00011     |

|    |           |              |   |   |   |         |             |                |
|----|-----------|--------------|---|---|---|---------|-------------|----------------|
| 11 | 117373055 | rs6589612    | G | C | M | Disease | 0.788348634 | M Disease&NULL |
| 11 | 116521975 | rs562756     | C | G | M | Disease | 0.783299685 | M Disease&NULL |
| 11 | 118186305 | rs2231449    | A | C | M | Disease | 0.782449776 | M Disease&NULL |
| 11 | 118700425 | rs10128600   | C | T | M | Disease | 0.781597464 | M Disease&NULL |
| 11 | 116522156 | rs563917     | T | C | M | Disease | 0.781597464 | M Disease&NULL |
| 11 | 116522164 | rs492182     | A | G | M | Disease | 0.781597464 | M Disease&NULL |
| 11 | 116588904 | rs1262892    | A | G | M | Disease | 0.781597464 | M Disease&NULL |
| 11 | 116522111 | rs563796     | G | A | M | Disease | 0.778164185 | M Disease&NULL |
| 11 | 118699863 | rs2510901    | A | G | M | Disease | 0.777299861 | M Disease&NULL |
| 11 | 118762218 | rs543824     | G | A | M | Disease | 0.775564014 | M Disease&NULL |
| 11 | 118944909 | rs563162     | T | C | M | Disease | 0.775564014 | M Disease&NULL |
| 11 | 118163916 | rs11216846   | A | G | M | Disease | 0.774692493 | M Disease&NULL |
| 11 | 116521988 | rs491022     | C | T | M | Disease | 0.773818574 | M Disease&NULL |
| 11 | 118707171 | rs4938550    | G | A | M | Disease | 0.773818574 | M Disease&NULL |
| 11 | 116522330 | rs565607     | T | C | M | Disease | 0.772942259 | M Disease&NULL |
| 11 | 116521558 | rs575906     | G | A | M | Disease | 0.772942259 | M Disease&NULL |
| 11 | 117379086 | rs10750107   | C | T | M | Disease | 0.772942259 | M Disease&NULL |
| 11 | 116520434 | rs506222     | C | A | M | Disease | 0.772942259 | M Disease&NULL |
| 11 | 118698160 | rs640373     | G | A | M | Disease | 0.772063549 | M Disease&NULL |
| 11 | 118698274 | rs639915     | A | G | M | Disease | 0.772063549 | M Disease&NULL |
| 11 | 118698294 | rs639885     | A | G | M | Disease | 0.772063549 | M Disease&NULL |
| 11 | 118698537 | rs638893     | G | A | M | Disease | 0.772063549 | M Disease&NULL |
| 11 | 118697375 | rs73005500   | C | T | M | Disease | 0.772063549 | M Disease&NULL |
| 11 | 116291220 | rs57150747   | A | G | M | Disease | 0.771182446 | M Disease&NULL |
| 11 | 118698777 | rs516332     | G | A | M | Disease | 0.770298949 | M Disease&NULL |
| 11 | 118629031 | rs555639     | A | G | M | Disease | 0.770298949 | M Disease&NULL |
| 11 | 117513801 | rs10892147   | C | T | M | Disease | 0.769413061 | M Disease&NULL |
| 11 | 118699744 | rs2508564    | C | T | M | Disease | 0.769413061 | M Disease&NULL |
| 11 | 118181481 | rs11216848   | A | C | M | Disease | 0.769413061 | M Disease&NULL |
| 11 | 118566069 | rs506255     | A | C | M | Disease | 0.765845626 | M Disease&NULL |
| 11 | 116520398 | rs544479     | C | T | M | Disease | 0.764947804 | M Disease&NULL |
| 11 | 116520926 | rs549125     | G | C | M | Disease | 0.764947804 | M Disease&NULL |
| 11 | 116521135 | rs533668     | G | T | M | Disease | 0.764947804 | M Disease&NULL |
| 11 | 118788517 | rs73575424   | A | C | M | Disease | 0.764947804 | M Disease&NULL |
| 11 | 116521316 | rs573985     | A | G | M | Disease | 0.764947804 | M Disease&NULL |
| 11 | 117499061 | rs7928623    | C | T | M | Disease | 0.763145016 | M Disease&NULL |
| 11 | 116519739 | rs499790     | T | C | M | Disease | 0.760423002 | M Disease&NULL |
| 11 | 116519358 | rs513533     | G | A | M | Disease | 0.759510917 | M Disease&NULL |
| 11 | 116519584 | rs516043     | G | C | M | Disease | 0.759510917 | M Disease&NULL |
| 11 | 117811037 | rs117560784  | A | G | M | Disease | 0.759510917 | M Disease&NULL |
| 11 | 118705654 | rs649338     | A | G | M | Disease | 0.758596462 | M Disease&NULL |
| 11 | 117291144 | rs73592158   | A | G | M | Disease | 0.758596462 | M Disease&NULL |
| 11 | 117291266 | rs1228933145 | G | T | M | Disease | 0.758596462 | M Disease&NULL |
| 11 | 117293463 | rs11820562   | G | A | M | Disease | 0.757679639 | M Disease&NULL |
| 11 | 118703001 | rs7928228    | T | C | M | Disease | 0.757679639 | M Disease&NULL |
| 11 | 118703484 | rs2508921    | T | C | M | Disease | 0.757679639 | M Disease&NULL |
| 11 | 118703817 | rs1170396    | T | A | M | Disease | 0.757679639 | M Disease&NULL |
| 11 | 118704265 | rs622690     | T | C | M | Disease | 0.757679639 | M Disease&NULL |
| 11 | 117372097 | rs6589610    | T | C | M | Disease | 0.755838899 | M Disease&NULL |
| 11 | 118701898 | rs533254     | A | T | M | Disease | 0.755838899 | M Disease&NULL |
| 11 | 118704255 | rs480791     | G | A | M | Disease | 0.755838899 | M Disease&NULL |
| 11 | 117274521 | rs139132354  | A | T | M | Disease | 0.755838899 | M Disease&NULL |
| 11 | 118590668 | rs11216980   | A | C | M | Disease | 0.754914987 | M Disease&NULL |
| 11 | 118503912 | rs45478298   | T | C | M | Disease | 0.753988716 | M Disease&NULL |
| 11 | 118631653 | rs1784543    | T | A | M | Disease | 0.75306009  | M Disease&NULL |
| 11 | 118631288 | rs507890     | C | T | M | Disease | 0.75306009  | M Disease&NULL |
| 11 | 117259782 | rs79763467   | A | G | M | Disease | 0.75306009  | M Disease&NULL |
| 11 | 117537864 | rs10892156   | T | C | M | Disease | 0.752129111 | M Disease&NULL |
| 11 | 117284721 | rs78049971   | T | C | M | Disease | 0.75306009  | M Disease&NULL |
| 11 | 116792961 | rs7948838    | G | A | M | Disease | 0.750260106 | M Disease&NULL |
| 11 | 118701597 | rs4938549    | T | C | M | Disease | 0.750260106 | M Disease&NULL |
| 11 | 118701668 | rs530646     | A | G | M | Disease | 0.750260106 | M Disease&NULL |
| 11 | 118632522 | rs581045     | T | C | M | Disease | 0.749322084 | M Disease&NULL |
| 11 | 117291361 | rs10790182   | T | C | M | Disease | 0.749322084 | M Disease&NULL |
| 11 | 117537353 | rs10431082   | T | G | M | Disease | 0.748381722 | M Disease&NULL |
| 11 | 118702002 | rs534114     | A | G | M | Disease | 0.749322084 | M Disease&NULL |
| 11 | 116516873 | rs71480307   | A | G | M | Disease | 0.748381722 | M Disease&NULL |
| 11 | 117378004 | rs73008432   | T | C | M | Disease | 0.748381722 | M Disease&NULL |
| 11 | 117085270 | rs236911     | C | A | M | Disease | 0.74743902  | M Disease&NULL |
| 11 | 116283516 | rs11823029   | C | T | M | Disease | 0.74743902  | M Disease&NULL |
| 11 | 116638657 | rs149153426  | G | T | M | Disease | 0.74743902  | M Disease&NULL |
| 11 | 117372126 | rs6589611    | T | A | M | Disease | 0.745546614 | M Disease&NULL |
| 11 | 117380850 | rs2840350    | T | C | M | Disease | 0.745546614 | M Disease&NULL |
| 11 | 120454129 | rs117764543  | G | T | M | Disease | 0.745546614 | M Disease&NULL |
| 11 | 116517325 | rs35165288   | C | T | M | Disease | 0.744596916 | M Disease&NULL |
| 11 | 118658075 | rs515523     | G | A | M | Disease | 0.743644892 | M Disease&NULL |
| 11 | 118598936 | rs184071181  | C | T | M | Disease | 0.744596916 | M Disease&NULL |
| 11 | 118785982 | rs79157249   | T | A | M | Disease | 0.743644892 | M Disease&NULL |
| 11 | 116981001 | rs4635117    | A | G | M | Disease | 0.742690545 | M Disease&NULL |
| 11 | 118702910 | rs7941321    | A | G | M | Disease | 0.742690545 | M Disease&NULL |
| 11 | 118754353 | rs630923     | A | C | M | Disease | 0.742690545 | M Disease&NULL |
| 11 | 116767688 | rs2270392    | C | T | M | Disease | 0.74173388  | M Disease&NULL |
| 11 | 116776826 | rs7111854    | T | A | M | Disease | 0.74173388  | M Disease&NULL |
| 11 | 116784376 | rs7115583    | T | G | M | Disease | 0.739813607 | M Disease&NULL |
| 11 | 118651809 | rs555649     | C | T | M | Disease | 0.739813607 | M Disease&NULL |
| 11 | 117802888 | rs147413777  | A | G | M | Disease | 0.739813607 | M Disease&NULL |
| 11 | 118659896 | rs2105782    | C | T | M | Disease | 0.738850006 | M Disease&NULL |
| 11 | 116797684 | rs11216190   | C | T | M | Disease | 0.736915896 | M Disease&NULL |
| 11 | 116813979 | rs12292858   | C | A | M | Disease | 0.736915896 | M Disease&NULL |
| 11 | 116816216 | rs10892049   | C | G | M | Disease | 0.736915896 | M Disease&NULL |
| 11 | 116817655 | rs191655881  | C | A | M | Disease | 0.736915896 | M Disease&NULL |
| 11 | 116820088 | rs12420518   | C | T | M | Disease | 0.736915896 | M Disease&NULL |
| 11 | 116822528 | rs12286405   | T | C | M | Disease | 0.736915896 | M Disease&NULL |
| 11 | 116848329 | rs11216210   | T | G | M | Disease | 0.736915896 | M Disease&NULL |
| 11 | 116851608 | rs7358350    | C | T | M | Disease | 0.736915896 | M Disease&NULL |
| 11 | 117370229 | rs624515     | G | T | M | Disease | 0.735945394 | M Disease&NULL |

|    |           |            |   |   |  |       |           |           |       |          |
|----|-----------|------------|---|---|--|-------|-----------|-----------|-------|----------|
| 11 | 117373055 | rs6589612  | G | C |  | 1.091 | -7977.388 | -7974.76  | 2.629 | 5.36E-05 |
| 11 | 116521975 | rs562756   | C | G |  | 0.879 | -7977.388 | -7974.824 | 2.564 | 5.02E-05 |
| 11 | 118186305 | rs2231449  | A | C |  | 1.243 | -7977.388 | -7974.839 | 2.549 | 4.95E-05 |
| 11 | 118700425 | rs10128600 | C | T |  | 0.897 | -7977.388 | -7974.845 | 2.543 | 4.92E-05 |
| 11 | 116522156 | rs563917   | T | C |  | 0.88  | -7977.388 | -7974.846 | 2.542 | 4.91E-05 |
| 11 | 116522164 | rs492182   | A | G |  | 0.88  | -7977.388 | -7974.846 | 2.542 | 4.91E-05 |
| 11 | 116588904 | rs1262892  | A | G |  | 0.834 | -7977.388 | -7974.848 | 2.541 | 4.91E-05 |
| 11 | 116522111 | rs563796   | G | A |  | 0.88  | -7977.388 | -7974.886 | 2.503 | 4.73E-05 |
| 11 | 118699863 | rs2510901  | A | G |  | 0.897 | -7977.388 | -7974.887 | 2.502 | 4.72E-05 |
| 11 | 118762218 | rs543824   | G | A |  | 1.104 | -7977.388 | -7974.914 | 2.474 | 4.59E-05 |
| 11 | 118944909 | rs563162   | T | C |  | 1.152 | -7977.388 | -7974.917 | 2.471 | 4.58E-05 |
| 11 | 118163916 | rs11216846 | A | G |  | 1.238 | -7977.388 | -7974.926 | 2.463 | 4.54E-05 |
| 11 | 116521988 | rs491022   | C | T |  | 0.881 | -7977.388 | -7974.934 | 2.454 | 4.50E-05 |
| 11 | 118707171 | rs4938550  | G | A |  | 0.897 | -7977.388 | -7974.936 | 2.452 | 4.49E-05 |
| 11 | 116522330 | rs565607   | T | C |  | 0.881 | -7977.388 | -7974.937 | 2.451 | 4.49E-05 |
| 11 | 116521558 | rs575906   | G | A |  | 0.881 | -7977.388 | -7974.943 | 2.446 | 4.46E-05 |
| 11 | 117379086 | rs10750107 | C | T |  | 1.09  | -7977.388 | -7974.943 | 2.445 | 4.46E-05 |
| 11 | 116520434 | rs506222   | C | A |  | 0.881 | -7977.388 | -7974.946 | 2.442 | 4.45E-05 |
| 11 | 118698160 | rs640373   | G | A |  | 0.898 | -7977.388 | -7974.947 | 2.441 | 4.44E-05 |
| 11 | 118698274 | rs639915   | A | G |  | 0.898 | -7977.388 | -7974.947 | 2.441 | 4.44E-05 |
| 11 | 118698294 | rs639885   | A | G |  | 0.898 | -7977.388 | -7974.947 | 2.441 | 4.44E-05 |
| 11 | 118698537 | rs638893   | G | A |  | 0.898 | -7977.388 | -7974.947 | 2.441 | 4.44E-05 |
| 11 | 118697375 | rs73005500 | C | T |  | 0.898 | -7977.388 | -7974.952 | 2.436 | 4.42E-05 |
| 11 | 116291220 | rs57150747 | A | G |  | 1.142 | -7977.388 | -7974.96  | 2.428 | 4.38E-05 |
| 11 | 118698777 | rs516332   | G | A |  | 0.898 | -7977.388 | -7974.967 | 2.421 | 4.35E-05 |
| 11 | 118629031 | rs555639   | A | G |  | 0.918 | -7977.388 | -7974.973 | 2.415 | 4.33E-05 |
| 11 | 117513801 | rs10892147 | C | T |  | 1.113 | -7977.388 | -7974.98  | 2.408 | 4.30E-05 |
| 11 | 118699744 | rs2508564  | C | T |  | 0.898 | -7977.388 | -7974.981 | 2.407 | 4.29E-05 |
| 11 | 118181481 | rs11216848 | A | C |  | 1.236 | -7977.388 | -7974.982 | 2.406 | 4.29E-05 |
| 11 | 118566069 | rs506255   | A | C |  | 0.882 | -7977.388 | -7975.022 | 2.366 | 4.12E-05 |
| 11 | 116520398 | rs544479   | C | T |  | 0.882 | -7977.388 | -7975.03  | 2.358 | 4.09E-05 |
| 11 | 116520926 | rs549125   | G | C |  | 0.882 | -7977.388 | -7975.03  | 2.358 | 4.09E-05 |
| 11 | 116521135 | rs533668   | G | T |  | 0.882 | -7977.388 | -7975.03  | 2.358 | 4.09E-05 |
| 11 | 118788517 | rs73575424 | A | C |  | 0.883 | -7977.388 | -7975.03  | 2.358 | 4.09E-05 |
| 11 | 116521316 | rs573985   | A | G |  | 0.882 | -7977.388 | -7975.032 | 2.356 | 4.08E-05 |
| 11 | 117499061 | rs7928623  | C | T |  | 1.142 | -7977.388 | -7975.049 | 2.339 | 4.01E-05 |
| 11 | 116519739 | rs499790   | T | C |  | 0.883 | -7977.388 | -7975.085 | 2.303 | 3.87E-05 |
| 11 | 116519358 | rs513533   | G |   |  |       |           |           |       |          |

|    |           |              |   |   |   |         |             |   |              |
|----|-----------|--------------|---|---|---|---------|-------------|---|--------------|
| 11 | 117292208 | rs7938710    | T | C | M | Disease | 0.736915896 | M | Disease&NULL |
| 11 | 116647152 | rs34552724   | C | T | M | Disease | 0.736915896 | M | Disease&NULL |
| 11 | 117498485 | rs77416199   | C | T | M | Disease | 0.735945394 | M | Disease&NULL |
| 11 | 118702936 | rs7941696    | G | A | M | Disease | 0.735945394 | M | Disease&NULL |
| 11 | 118644582 | rs2510897    | C | A | M | Disease | 0.733997517 | M | Disease&NULL |
| 11 | 118587319 | rs10892263   | C | T | M | Disease | 0.733997517 | M | Disease&NULL |
| 11 | 118588952 | rs12421790   | T | C | M | Disease | 0.733020149 | M | Disease&NULL |
| 11 | 117104148 | rs582179     | G | A | M | Disease | 0.733020149 | M | Disease&NULL |
| 11 | 119205735 | rs12797083   | C | T | M | Disease | 0.733020149 | M | Disease&NULL |
| 11 | 118585826 | rs11216972   | T | C | M | Disease | 0.732040502 | M | Disease&NULL |
| 11 | 117431753 | rs11606341   | T | G | M | Disease | 0.731058579 | M | Disease&NULL |
| 11 | 117380108 | rs4936383    | A | G | M | Disease | 0.730074384 | M | Disease&NULL |
| 11 | 118589012 | rs12421793   | A | C | M | Disease | 0.730074384 | M | Disease&NULL |
| 11 | 117408890 | rs4609639    | C | T | M | Disease | 0.730074384 | M | Disease&NULL |
| 11 | 119205830 | rs12795576   | G | A | M | Disease | 0.727108216 | M | Disease&NULL |
| 11 | 116879224 | rs12271319   | T | C | M | Disease | 0.726114981 | M | Disease&NULL |
| 11 | 116831843 | rs11216200   | T | C | M | Disease | 0.726114981 | M | Disease&NULL |
| 11 | 116858994 | rs10160754   | C | A | M | Disease | 0.726114981 | M | Disease&NULL |
| 11 | 116859003 | rs10160755   | G | A | M | Disease | 0.726114981 | M | Disease&NULL |
| 11 | 118587097 | rs10892262   | C | G | M | Disease | 0.725119498 | M | Disease&NULL |
| 11 | 117368804 | rs77822543   | T | C | M | Disease | 0.723121805 | M | Disease&NULL |
| 11 | 117372548 | rs10790191   | A | G | M | Disease | 0.722119606 | M | Disease&NULL |
| 11 | 116880456 | rs7112937    | C | T | M | Disease | 0.722119606 | M | Disease&NULL |
| 11 | 116940449 | rs12280210   | C | T | M | Disease | 0.722119606 | M | Disease&NULL |
| 11 | 117496431 | rs75349886   | G | A | M | Disease | 0.722119606 | M | Disease&NULL |
| 11 | 119203505 | rs11824001   | T | C | M | Disease | 0.720108527 | M | Disease&NULL |
| 11 | 119529529 | rs951786     | G | A | M | Disease | 0.719099657 | M | Disease&NULL |
| 11 | 116525730 | rs480823     | C | T | M | Disease | 0.719099657 | M | Disease&NULL |
| 11 | 117494945 | rs7946890    | C | A | M | Disease | 0.718088575 | M | Disease&NULL |
| 11 | 118705145 | rs636736     | G | A | M | Disease | 0.717075285 | M | Disease&NULL |
| 11 | 116525867 | rs481843     | T | C | M | Disease | 0.716059794 | M | Disease&NULL |
| 11 | 116837373 | rs9971422    | C | T | M | Disease | 0.716059794 | M | Disease&NULL |
| 11 | 116879519 | rs12284696   | G | A | M | Disease | 0.715042106 | M | Disease&NULL |
| 11 | 118652569 | rs150792202  | A | G | M | Disease | 0.715042106 | M | Disease&NULL |
| 11 | 116515557 | rs71480306   | C | T | M | Disease | 0.715042106 | M | Disease&NULL |
| 11 | 116863988 | rs11216220   | C | T | M | Disease | 0.715042106 | M | Disease&NULL |
| 11 | 118657311 | rs1309473877 | A | C | M | Disease | 0.714022227 | M | Disease&NULL |
| 11 | 117536758 | rs11216492   | G | A | M | Disease | 0.714022227 | M | Disease&NULL |
| 11 | 116866240 | rs7931665    | G | A | M | Disease | 0.713000163 | M | Disease&NULL |
| 11 | 116872034 | rs10892057   | C | A | M | Disease | 0.710949503 | M | Disease&NULL |
| 11 | 116875152 | rs7946390    | G | A | M | Disease | 0.710949503 | M | Disease&NULL |
| 11 | 116875924 | rs11216224   | C | T | M | Disease | 0.710949503 | M | Disease&NULL |
| 11 | 116876442 | rs1940625    | G | A | M | Disease | 0.710949503 | M | Disease&NULL |
| 11 | 116878014 | rs11216225   | G | A | M | Disease | 0.710949503 | M | Disease&NULL |
| 11 | 119214135 | rs948412     | G | A | M | Disease | 0.710949503 | M | Disease&NULL |
| 11 | 116837089 | rs78044162   | T | C | M | Disease | 0.709920918 | M | Disease&NULL |
| 11 | 120691285 | rs4936554    | T | C | M | Disease | 0.706822221 | M | Disease&NULL |
| 11 | 119208561 | rs2511840    | C | G | M | Disease | 0.706822221 | M | Disease&NULL |
| 11 | 117296641 | rs138471627  | T | C | M | Disease | 0.706822221 | M | Disease&NULL |
| 11 | 117407658 | rs2155392    | C | G | M | Disease | 0.706822221 | M | Disease&NULL |
| 11 | 116993181 | rs6589596    | T | C | M | Disease | 0.704745698 | M | Disease&NULL |
| 11 | 118757191 | rs1790192    | G | A | M | Disease | 0.704745698 | M | Disease&NULL |
| 11 | 116981580 | rs2127907    | A | G | M | Disease | 0.704745698 | M | Disease&NULL |
| 11 | 117405785 | rs61277802   | A | G | M | Disease | 0.703704238 | M | Disease&NULL |
| 11 | 116870480 | rs10502224   | G | A | M | Disease | 0.700567142 | M | Disease&NULL |
| 11 | 120689582 | rs11218014   | A | G | M | Disease | 0.699517228 | M | Disease&NULL |
| 11 | 117847373 | rs79459300   | T | C | M | Disease | 0.699517228 | M | Disease&NULL |
| 11 | 118220027 | rs73016221   | C | T | M | Disease | 0.698465216 | M | Disease&NULL |
| 11 | 116519129 | rs1240772    | C | G | M | Disease | 0.69635493  | M | Disease&NULL |
| 11 | 116664654 | rs45557239   | T | C | M | Disease | 0.697411114 | M | Disease&NULL |
| 11 | 119527302 | rs9888246    | T | C | M | Disease | 0.69635493  | M | Disease&NULL |
| 11 | 116997798 | rs6589597    | C | T | M | Disease | 0.695296669 | M | Disease&NULL |
| 11 | 117401657 | rs11826885   | C | C | M | Disease | 0.69423634  | M | Disease&NULL |
| 11 | 118765688 | rs676925     | G | C | M | Disease | 0.693173949 | M | Disease&NULL |
| 11 | 118678780 | rs500254     | G | A | M | Disease | 0.693173949 | M | Disease&NULL |
| 11 | 118665009 | rs4938544    | A | G | M | Disease | 0.693173949 | M | Disease&NULL |
| 11 | 116552860 | rs113194822  | A | G | M | Disease | 0.693173949 | M | Disease&NULL |
| 11 | 118764051 | rs613791     | T | C | M | Disease | 0.692109504 | M | Disease&NULL |
| 11 | 118665324 | rs61901411   | T | C | M | Disease | 0.691043012 | M | Disease&NULL |
| 11 | 116977888 | rs10160799   | G | A | M | Disease | 0.691043012 | M | Disease&NULL |
| 11 | 117263616 | rs1482242286 | G | T | M | Disease | 0.691043012 | M | Disease&NULL |
| 11 | 118668908 | rs582200     | G | A | M | Disease | 0.691043012 | M | Disease&NULL |
| 11 | 117268074 | rs77543424   | G | C | M | Disease | 0.691043012 | M | Disease&NULL |
| 11 | 117263103 | rs478693     | C | T | M | Disease | 0.688903918 | M | Disease&NULL |
| 11 | 117502041 | rs71480346   | T | C | M | Disease | 0.688903918 | M | Disease&NULL |
| 11 | 117037361 | rs7112513    | A | G | M | Disease | 0.687831331 | M | Disease&NULL |
| 11 | 118680072 | rs607472     | G | C | M | Disease | 0.687831331 | M | Disease&NULL |
| 11 | 119528905 | rs931953     | G | A | M | Disease | 0.687831331 | M | Disease&NULL |
| 11 | 116979689 | rs10750101   | T | C | M | Disease | 0.687831331 | M | Disease&NULL |
| 11 | 116328380 | rs12418858   | A | G | M | Disease | 0.686756727 | M | Disease&NULL |
| 11 | 117010320 | rs2471884    | T | C | M | Disease | 0.686756727 | M | Disease&NULL |
| 11 | 117422690 | rs73010348   | A | G | M | Disease | 0.685680114 | M | Disease&NULL |
| 11 | 119678810 | rs10750166   | C | G | M | Disease | 0.685680114 | M | Disease&NULL |
| 11 | 118217854 | rs3212262    | T | G | M | Disease | 0.6846015   | M | Disease&NULL |
| 11 | 118677083 | rs675003     | T | C | M | Disease | 0.6846015   | M | Disease&NULL |
| 11 | 118912207 | rs4936460    | T | C | M | Disease | 0.683520894 | M | Disease&NULL |
| 11 | 119529524 | rs4445648    | T | C | M | Disease | 0.681353734 | M | Disease&NULL |
| 11 | 116999446 | rs7131536    | C | T | M | Disease | 0.680267197 | M | Disease&NULL |
| 11 | 116999559 | rs7131686    | C | T | M | Disease | 0.680267197 | M | Disease&NULL |
| 11 | 119572124 | rs73004983   | C | G | M | Disease | 0.680267197 | M | Disease&NULL |
| 11 | 117362165 | rs73024367   | A | G | M | Disease | 0.680267197 | M | Disease&NULL |
| 11 | 117453109 | rs77967735   | G | A | M | Disease | 0.679178699 | M | Disease&NULL |
| 11 | 117502961 | rs7929496    | T | C | M | Disease | 0.679178699 | M | Disease&NULL |
| 11 | 118662028 | rs12796102   | T | C | M | Disease | 0.67808825  | M | Disease&NULL |
| 11 | 117039325 | rs10892082   | T | G | M | Disease | 0.67808825  | M | Disease&NULL |
| 11 | 118679629 | rs1784300    | T | A | M | Disease | 0.67808825  | M | Disease&NULL |

|    |           |            |   |   |  |       |           |           |       |          |
|----|-----------|------------|---|---|--|-------|-----------|-----------|-------|----------|
| 11 | 117292208 | rs7938710  | T | C |  | 0.802 | -7977.388 | -7975.338 | 2.05  | 3.00E-05 |
| 11 | 116647152 | rs34552724 | C | T |  | 0.805 | -7977.388 | -7975.339 | 2.049 | 3.00E-05 |
| 11 | 117498485 | rs77416199 | C | T |  | 1.136 | -7977.388 | -7975.343 | 2.045 | 2.99E-05 |
| 11 | 118702936 | rs7941696  | G | A |  | 0.903 | -7977.388 | -7975.344 | 2.044 | 2.99E-05 |
| 11 | 118644582 | rs2510897  | C | A |  | 0.921 | -7977.388 | -7975.362 | 2.027 | 2.94E-05 |
| 11 | 118587319 | rs10892263 | C | T |  | 1.101 | -7977.388 | -7975.366 | 2.022 | 2.92E-05 |
| 11 | 118588952 | rs12421790 | T | C |  | 1.101 | -7977.388 | -7975.368 | 2.02  | 2.92E-05 |
| 11 | 117104148 | rs582179   | G | A |  | 0.91  | -7977.388 | -7975.371 | 2.017 | 2.91E-05 |
| 11 | 119205735 | rs12797083 | C | T |  | 0.922 | -7977.388 | -7975.372 | 2.017 | 2.91E-05 |
| 11 | 118585826 | rs11216972 | T | C |  | 1.1   | -7977.388 | -7975.383 | 2.005 | 2.87E-05 |
| 11 | 117431753 | rs11606341 | T | G |  | 1.09  | -7977.388 | -7975.389 | 1.999 | 2.86E-05 |
| 11 | 117380108 | rs4936383  | A | G |  | 0.922 | -7977.388 | -7975.396 | 1.992 | 2.84E-05 |
| 11 | 118589012 | rs12421793 | A | C |  | 1.1   | -7977.388 | -7975.4   | 1.989 | 2.83E-05 |
| 11 | 117408890 | rs4609639  | C | T |  | 0.816 | -7977.388 | -7975.403 | 1.985 | 2.82E-05 |
| 11 | 119205830 | rs12795576 | G | A |  | 0.922 | -7977.388 | -7975.431 | 1.957 | 2.74E-05 |
| 11 | 116879224 | rs12271319 | T | C |  | 1.139 | -7977.388 | -7975.44  | 1.948 | 2.71E-05 |
| 11 | 116831843 | rs11216200 | T | C |  | 1.139 | -7977.388 | -7975.445 | 1.943 | 2.70E-05 |
| 11 | 116858994 | rs10160754 | C | A |  | 1.139 | -7977.388 | -7975.447 | 1.941 | 2.69E-05 |
| 11 | 116859003 | rs10160755 | G | A |  | 1.139 | -7977.388 | -7975.447 | 1.941 | 2.69E-05 |
| 11 | 118587097 | rs10892262 | C | G |  | 1.1   | -7977.388 | -7975.453 | 1.935 | 2.68E-05 |
| 11 | 117368804 | rs77822543 | T | C |  | 1.146 | -7977.388 | -7975.47  | 1.918 | 2.63E-05 |
| 11 | 117372548 | rs10790191 | A | G |  | 0.923 | -7977.388 | -7975.475 | 1.913 | 2.62E-05 |
| 11 | 116880456 | rs7112937  | C | T |  | 1.138 | -7977.388 | -7975.479 | 1.91  | 2.61E-05 |
| 11 | 116940449 | rs12280210 | C | T |  | 1.138 | -7977.388 | -7975.482 | 1.906 | 2.60E-05 |
| 11 | 117496431 | rs75349886 | G | A |  | 1.132 | -7977.388 | -7975.483 | 1.906 | 2.60E-05 |
| 11 | 119203505 | rs11824001 | T | C |  | 0.923 | -7977.388 | -7975.499 | 1.889 | 2.56E-05 |
| 11 | 119529529 | rs951786   | G | A |  | 1.098 | -7977.388 | -7975.515 | 1.873 | 2.52E-05 |
| 11 | 116525730 | rs480823   | C | T |  | 0.879 | -7977.388 | -7975.517 | 1.872 | 2.51E-05 |
| 11 | 117494945 | rs7946890  | C | A |  | 1.131 | -7977.388 | -7975.522 | 1.866 | 2.50E-05 |
| 11 | 118705145 | rs636736   | G | A |  | 0.905 | -7977.388 | -7975.527 | 1.861 | 2.49E-05 |
| 11 | 116525867 | rs481843   | T | C |  | 0.879 | -7977.388 | -7975.541 | 1.847 | 2.45E-05 |
| 11 | 116837373 | rs9971422  | C | T |  | 1.137 | -7977.388 | -7975.547 | 1.842 | 2.44E-05 |
| 11 | 116879519 | rs12284696 | G | A |  | 1.137 |           |           |       |          |

|    |           |              |   |   |   |         |             |   |              |
|----|-----------|--------------|---|---|---|---------|-------------|---|--------------|
| 11 | 117404312 | rs56198555   | T | C | M | Disease | 0.67808825  | M | Disease&NULL |
| 11 | 119213782 | rs948411     | T | A | M | Disease | 0.676995856 | M | Disease&NULL |
| 11 | 119529332 | rs4245201    | C | T | M | Disease | 0.676995856 | M | Disease&NULL |
| 11 | 117024481 | rs7940310    | T | C | M | Disease | 0.676995856 | M | Disease&NULL |
| 11 | 117081500 | rs11216316   | C | A | M | Disease | 0.675901528 | M | Disease&NULL |
| 11 | 120850004 | rs1334757891 | T | C | M | Disease | 0.673707099 | M | Disease&NULL |
| 11 | 117045335 | rs7925256    | T | C | M | Disease | 0.673707099 | M | Disease&NULL |
| 11 | 116967666 | rs1320668    | C | T | M | Disease | 0.673707099 | M | Disease&NULL |
| 11 | 117027755 | rs7123517    | G | A | M | Disease | 0.673707099 | M | Disease&NULL |
| 11 | 117405907 | rs68096541   | C | G | M | Disease | 0.672607017 | M | Disease&NULL |
| 11 | 118662045 | rs7933859    | T | C | M | Disease | 0.672607017 | M | Disease&NULL |
| 11 | 118765267 | rs598207     | C | G | M | Disease | 0.672607017 | M | Disease&NULL |
| 11 | 119678767 | rs73577182   | C | G | M | Disease | 0.672607017 | M | Disease&NULL |
| 11 | 118833458 | rs111491960  | G | A | M | Disease | 0.671505034 | M | Disease&NULL |
| 11 | 116516966 | rs1176456955 | A | G | M | Disease | 0.671505034 | M | Disease&NULL |
| 11 | 118662203 | rs4508234    | G | C | M | Disease | 0.67040116  | M | Disease&NULL |
| 11 | 117534083 | rs7111427    | A | G | M | Disease | 0.67040116  | M | Disease&NULL |
| 11 | 117363891 | rs4096589    | T | A | M | Disease | 0.669295403 | M | Disease&NULL |
| 11 | 118662340 | rs5006102    | A | T | M | Disease | 0.669295403 | M | Disease&NULL |
| 11 | 118230359 | rs2276419    | T | C | M | Disease | 0.669295403 | M | Disease&NULL |
| 11 | 120848685 | rs75871913   | A | G | M | Disease | 0.669295403 | M | Disease&NULL |
| 11 | 117042377 | rs4936367    | G | A | M | Disease | 0.668187772 | M | Disease&NULL |
| 11 | 117044203 | rs4604928    | C | A | M | Disease | 0.668187772 | M | Disease&NULL |
| 11 | 117458673 | rs59607164   | G | A | M | Disease | 0.667078277 | M | Disease&NULL |
| 11 | 119203359 | rs2511847    | A | G | M | Disease | 0.667078277 | M | Disease&NULL |
| 11 | 116697081 | rs150555490  | T | C | M | Disease | 0.667078277 | M | Disease&NULL |
| 11 | 117034619 | rs17122944   | G | T | M | Disease | 0.665966927 | M | Disease&NULL |
| 11 | 117262598 | rs542821     | T | C | M | Disease | 0.665966927 | M | Disease&NULL |
| 11 | 117329630 | rs117043085  | T | C | M | Disease | 0.667078277 | M | Disease&NULL |
| 11 | 117024302 | rs7950633    | C | T | M | Disease | 0.66485373  | M | Disease&NULL |
| 11 | 117102648 | rs2252145    | C | T | M | Disease | 0.66485373  | M | Disease&NULL |
| 11 | 117531465 | rs1892918    | C | A | M | Disease | 0.66485373  | M | Disease&NULL |
| 11 | 118669178 | rs583213     | G | T | M | Disease | 0.663738697 | M | Disease&NULL |
| 11 | 120702916 | rs12283648   | C | A | M | Disease | 0.663738697 | M | Disease&NULL |
| 11 | 116485201 | rs71480304   | A | G | M | Disease | 0.662621837 | M | Disease&NULL |
| 11 | 117368182 | rs73008413   | T | A | M | Disease | 0.663738697 | M | Disease&NULL |
| 11 | 120795888 | rs949054     | C | T | M | Disease | 0.662621837 | M | Disease&NULL |
| 11 | 116488748 | rs4360730    | C | T | M | Disease | 0.662621837 | M | Disease&NULL |
| 11 | 116488753 | rs4565932    | A | G | M | Disease | 0.662621837 | M | Disease&NULL |
| 11 | 118617920 | rs476246     | T | C | M | Disease | 0.662621837 | M | Disease&NULL |
| 11 | 117214617 | rs144750609  | C | T | M | Disease | 0.662621837 | M | Disease&NULL |
| 11 | 117285699 | rs11826012   | C | T | M | Disease | 0.661503159 | M | Disease&NULL |
| 11 | 117285746 | rs1789157    | G | A | M | Disease | 0.661503159 | M | Disease&NULL |
| 11 | 118617544 | rs472641     | G | A | M | Disease | 0.661503159 | M | Disease&NULL |
| 11 | 118621495 | rs487728     | G | C | M | Disease | 0.661503159 | M | Disease&NULL |
| 11 | 118705753 | rs556437     | A | G | M | Disease | 0.660382673 | M | Disease&NULL |
| 11 | 116706168 | rs12721026   | G | T | M | Disease | 0.659260388 | M | Disease&NULL |
| 11 | 117368982 | rs2004927    | C | T | M | Disease | 0.659260388 | M | Disease&NULL |
| 11 | 119529106 | rs931954     | A | G | M | Disease | 0.658136315 | M | Disease&NULL |
| 11 | 117366973 | rs7130068    | C | T | M | Disease | 0.658136315 | M | Disease&NULL |
| 11 | 120858914 | rs670413     | A | G | M | Disease | 0.658136315 | M | Disease&NULL |
| 11 | 117537710 | rs686413     | A | G | M | Disease | 0.658136315 | M | Disease&NULL |
| 11 | 117367196 | rs73008408   | C | A | M | Disease | 0.658136315 | M | Disease&NULL |
| 11 | 116548356 | rs117339323  | C | T | M | Disease | 0.658136315 | M | Disease&NULL |
| 11 | 117803083 | rs117978531  | G | T | M | Disease | 0.658136315 | M | Disease&NULL |
| 11 | 118626511 | rs499343     | T | C | M | Disease | 0.657010463 | M | Disease&NULL |
| 11 | 117369226 | rs1807116    | C | T | M | Disease | 0.655882841 | M | Disease&NULL |
| 11 | 120858301 | rs74727906   | A | G | M | Disease | 0.655882841 | M | Disease&NULL |
| 11 | 117026374 | rs2127905    | A | C | M | Disease | 0.654753461 | M | Disease&NULL |
| 11 | 119918191 | rs1942010    | C | T | M | Disease | 0.653622331 | M | Disease&NULL |
| 11 | 119675331 | rs61897704   | T | C | M | Disease | 0.654753461 | M | Disease&NULL |
| 11 | 119675529 | rs61897705   | G | A | M | Disease | 0.654753461 | M | Disease&NULL |
| 11 | 117283471 | rs573965     | T | C | M | Disease | 0.653622331 | M | Disease&NULL |
| 11 | 117405696 | rs2076965    | A | T | M | Disease | 0.653622331 | M | Disease&NULL |
| 11 | 116281175 | rs76887844   | T | C | M | Disease | 0.653622331 | M | Disease&NULL |
| 11 | 116289906 | rs11215924   | A | T | M | Disease | 0.652489462 | M | Disease&NULL |
| 11 | 118624767 | rs581062     | A | G | M | Disease | 0.652489462 | M | Disease&NULL |
| 11 | 120988038 | rs140567534  | G | T | M | Disease | 0.652489462 | M | Disease&NULL |
| 11 | 119672586 | rs61897703   | T | G | M | Disease | 0.651354865 | M | Disease&NULL |
| 11 | 118839610 | rs113611963  | G | T | M | Disease | 0.651354865 | M | Disease&NULL |
| 11 | 117282979 | rs521099     | G | C | M | Disease | 0.650218549 | M | Disease&NULL |
| 11 | 119922006 | rs4420286    | A | G | M | Disease | 0.650218549 | M | Disease&NULL |
| 11 | 117441594 | rs79770727   | A | G | M | Disease | 0.650218549 | M | Disease&NULL |
| 11 | 119936017 | rs641924     | T | C | M | Disease | 0.650218549 | M | Disease&NULL |
| 11 | 119921117 | rs1452843    | T | C | M | Disease | 0.649080524 | M | Disease&NULL |
| 11 | 117531961 | rs594306     | A | T | M | Disease | 0.649080524 | M | Disease&NULL |
| 11 | 116493633 | rs12290281   | T | G | M | Disease | 0.649080524 | M | Disease&NULL |
| 11 | 116512477 | rs4936358    | A | G | M | Disease | 0.647940802 | M | Disease&NULL |
| 11 | 116290501 | rs58566212   | T | C | M | Disease | 0.645656306 | M | Disease&NULL |
| 11 | 117363066 | rs7119734    | T | C | M | Disease | 0.644511554 | M | Disease&NULL |
| 11 | 116583103 | rs2010611    | A | G | M | Disease | 0.644511554 | M | Disease&NULL |
| 11 | 120861279 | rs478015     | G | T | M | Disease | 0.643365146 | M | Disease&NULL |
| 11 | 117350621 | rs58080742   | A | C | M | Disease | 0.643365146 | M | Disease&NULL |
| 11 | 120861145 | rs596869     | T | A | M | Disease | 0.642217093 | M | Disease&NULL |
| 11 | 117091609 | rs236918     | C | G | M | Disease | 0.642217093 | M | Disease&NULL |
| 11 | 117284577 | rs2445936    | C | T | M | Disease | 0.641067406 | M | Disease&NULL |
| 11 | 116587953 | rs76542665   | A | C | M | Disease | 0.642217093 | M | Disease&NULL |
| 11 | 117356276 | rs12574158   | G | C | M | Disease | 0.641067406 | M | Disease&NULL |
| 11 | 116480266 | rs12282572   | C | T | M | Disease | 0.641067406 | M | Disease&NULL |
| 11 | 117062183 | rs1242230    | T | C | M | Disease | 0.641067406 | M | Disease&NULL |
| 11 | 117062370 | rs1242229    | T | C | M | Disease | 0.641067406 | M | Disease&NULL |
| 11 | 120860814 | rs598582     | G | A | M | Disease | 0.639916097 | M | Disease&NULL |
| 11 | 117377518 | rs7123652    | C | T | M | Disease | 0.639916097 | M | Disease&NULL |
| 11 | 120413124 | rs2266133    | C | T | M | Disease | 0.638763175 | M | Disease&NULL |
| 11 | 120860200 | rs536333     | C | T | M | Disease | 0.638763175 | M | Disease&NULL |
| 11 | 120860288 | rs611065     | C | A | M | Disease | 0.638763175 | M | Disease&NULL |

|    |           |              |   |   |  |       |           |           |       |          |
|----|-----------|--------------|---|---|--|-------|-----------|-----------|-------|----------|
| 11 | 117404312 | rs56198555   | T | C |  | 0.873 | -7977.388 | -7975.903 | 1.485 | 1.71E-05 |
| 11 | 119213782 | rs948411     | T | A |  | 1.11  | -7977.388 | -7975.908 | 1.481 | 1.70E-05 |
| 11 | 119529332 | rs4245201    | C | T |  | 1.093 | -7977.388 | -7975.909 | 1.479 | 1.70E-05 |
| 11 | 117024481 | rs7940310    | T | C |  | 0.895 | -7977.388 | -7975.911 | 1.478 | 1.70E-05 |
| 11 | 117081500 | rs11216316   | C | A |  | 0.894 | -7977.388 | -7975.923 | 1.465 | 1.67E-05 |
| 11 | 120850004 | rs1334757891 | T | C |  | 0.926 | -7977.388 | -7975.936 | 1.452 | 1.65E-05 |
| 11 | 117045335 | rs7925256    | T | C |  | 0.888 | -7977.388 | -7975.94  | 1.449 | 1.65E-05 |
| 11 | 116967666 | rs1320668    | C | T |  | 0.896 | -7977.388 | -7975.943 | 1.446 | 1.64E-05 |
| 11 | 117027755 | rs7123517    | G | A |  | 0.895 | -7977.388 | -7975.946 | 1.442 | 1.64E-05 |
| 11 | 117405907 | rs68096541   | C | G |  | 1.088 | -7977.388 | -7975.954 | 1.434 | 1.62E-05 |
| 11 | 118662045 | rs7933859    | T | C |  | 0.9   | -7977.388 | -7975.954 | 1.434 | 1.62E-05 |
| 11 | 118765267 | rs598207     | C | G |  | 1.087 | -7977.388 | -7975.955 | 1.433 | 1.62E-05 |
| 11 | 119678767 | rs73577182   | C | G |  | 0.849 | -7977.388 | -7975.958 | 1.43  | 1.62E-05 |
| 11 | 118833458 | rs111491960  | G | A |  | 0.902 | -7977.388 | -7975.963 | 1.425 | 1.61E-05 |
| 11 | 116516966 | rs1176456955 | A | G |  | 0.824 | -7977.388 | -7975.965 | 1.423 | 1.61E-05 |
| 11 | 118662203 | rs4508234    | G | C |  | 0.9   | -7977.388 | -7975.969 | 1.419 | 1.60E-05 |
| 11 | 117534083 | rs7111427    | A | G |  | 0.922 | -7977.388 | -7975.972 | 1.416 | 1.59E-05 |
| 11 | 117363891 | rs4096589    | T | A |  | 1.079 | -7977.388 | -7975.978 | 1.41  | 1.58E-05 |
| 11 | 118662340 | rs5006102    | A | T |  | 0.901 | -7977.388 | -7975.983 | 1.406 | 1.58E-05 |
| 11 | 118230359 | rs2276419    | T | C |  | 1.117 | -7977.388 | -7975.986 | 1.402 | 1.57E-05 |
| 11 | 120848685 | rs75871913   | A | G |  | 0.836 | -7977.388 | -7975.989 | 1.399 | 1.57E-05 |
| 11 | 117042377 | rs4936367    | G | A |  | 0.896 | -7977.388 | -7975.992 | 1.396 | 1.56E-05 |
| 11 | 117044203 | rs4604928    | C | A |  | 0.896 | -7977.388 | -7975.992 | 1.396 | 1.56E-05 |
| 11 | 117458673 | rs59607164   | G | A |  | 1.124 | -7977.388 | -7976.001 | 1.388 | 1.55E-05 |
| 11 | 119203359 | rs2511847    | A | G |  | 1.108 | -7977.388 | -7976     | 1.388 | 1.55E-05 |
| 11 | 116697081 | rs150555490  | T | C |  | 1.152 | -7977.388 | -7976.007 | 1.381 | 1.54E-05 |
| 11 | 117034619 | rs17122944   | G | T |  | 0.896 | -7977.388 | -7976.008 | 1.381 | 1.54E-05 |
| 11 | 117262598 | rs542821     | T | C |  | 0.892 | -7977.388 | -7976.009 | 1.379 | 1.54E-05 |
| 11 | 117329630 | rs117043085  | T | C |  | 0.808 | -7977.388 | -7976.013 | 1.375 | 1.53E-05 |
| 11 | 117024302 | rs7950633    | C | T |  | 0.897 | -7977.388 | -7976.017 | 1.371 | 1.52E-05 |
| 11 | 117102648 | rs2252145    | C | T |  | 0.918 | -7977.388 | -7976.017 | 1.371 | 1.52E-05 |
| 11 | 117531465 | rs1892918    | C | A |  | 1.088 | -7977.388 | -7976.025 | 1.363 | 1.51E-05 |
| 11 | 118669178 | rs583213     | G | T |  | 0.902 | -7977.388 |           |       |          |

|    |           |              |   |   |   |         |             |   |              |
|----|-----------|--------------|---|---|---|---------|-------------|---|--------------|
| 11 | 120860499 | rs560092     | G | A | M | Disease | 0.638763175 | M | Disease&NULL |
| 11 | 120861094 | rs565597     | C | T | M | Disease | 0.638763175 | M | Disease&NULL |
| 11 | 117294973 | rs4938375    | C | T | M | Disease | 0.638763175 | M | Disease&NULL |
| 11 | 117266466 | rs483837     | C | T | M | Disease | 0.637608653 | M | Disease&NULL |
| 11 | 117394979 | rs12577702   | C | T | M | Disease | 0.63645254  | M | Disease&NULL |
| 11 | 116587889 | rs17119920   | G | C | M | Disease | 0.63645254  | M | Disease&NULL |
| 11 | 117521967 | rs16867      | C | T | M | Disease | 0.635294849 | M | Disease&NULL |
| 11 | 121079940 | rs78733282   | G | A | M | Disease | 0.63645254  | M | Disease&NULL |
| 11 | 116197149 | rs12789310   | G | A | M | Disease | 0.635294849 | M | Disease&NULL |
| 11 | 116966435 | rs900012     | G | A | M | Disease | 0.635294849 | M | Disease&NULL |
| 11 | 119913501 | rs656015     | A | G | M | Disease | 0.634135591 | M | Disease&NULL |
| 11 | 116921390 | rs1815786    | T | C | M | Disease | 0.632974777 | M | Disease&NULL |
| 11 | 117284770 | rs540904     | C | T | M | Disease | 0.632974777 | M | Disease&NULL |
| 11 | 116202789 | rs12806755   | C | T | M | Disease | 0.632974777 | M | Disease&NULL |
| 11 | 120861385 | rs595851     | A | G | M | Disease | 0.632974777 | M | Disease&NULL |
| 11 | 117294959 | rs4936376    | T | C | M | Disease | 0.631812418 | M | Disease&NULL |
| 11 | 117283626 | rs572884     | G | A | M | Disease | 0.629483112 | M | Disease&NULL |
| 11 | 117283634 | rs572862     | G | A | M | Disease | 0.629483112 | M | Disease&NULL |
| 11 | 117258662 | rs574813     | G | C | M | Disease | 0.629483112 | M | Disease&NULL |
| 11 | 117258687 | rs574873     | T | G | M | Disease | 0.629483112 | M | Disease&NULL |
| 11 | 118700557 | rs4291686    | G | A | M | Disease | 0.629483112 | M | Disease&NULL |
| 11 | 117370831 | rs58949729   | T | G | M | Disease | 0.628316188 | M | Disease&NULL |
| 11 | 117295431 | rs4938376    | G | A | M | Disease | 0.628316188 | M | Disease&NULL |
| 11 | 117003459 | rs17120373   | G | A | M | Disease | 0.627147766 | M | Disease&NULL |
| 11 | 117461888 | rs61213686   | C | T | M | Disease | 0.627147766 | M | Disease&NULL |
| 11 | 117561256 | rs114797458  | A | G | M | Disease | 0.628316188 | M | Disease&NULL |
| 11 | 120863568 | rs607800     | T | C | M | Disease | 0.625977858 | M | Disease&NULL |
| 11 | 117489645 | rs685184     | T | C | M | Disease | 0.625977858 | M | Disease&NULL |
| 11 | 117261853 | rs494553     | T | C | M | Disease | 0.624806474 | M | Disease&NULL |
| 11 | 119853138 | rs17123519   | T | C | M | Disease | 0.624806474 | M | Disease&NULL |
| 11 | 118699276 | rs625274     | T | C | M | Disease | 0.623633628 | M | Disease&NULL |
| 11 | 117296160 | rs10750105   | A | T | M | Disease | 0.624806474 | M | Disease&NULL |
| 11 | 117368358 | rs73008415   | T | C | M | Disease | 0.624806474 | M | Disease&NULL |
| 11 | 117288442 | rs579274     | C | T | M | Disease | 0.623633628 | M | Disease&NULL |
| 11 | 116409093 | rs10502220   | C | T | M | Disease | 0.623633628 | M | Disease&NULL |
| 11 | 117264256 | rs506366     | A | G | M | Disease | 0.622459331 | M | Disease&NULL |
| 11 | 116325337 | rs11215942   | A | G | M | Disease | 0.623633628 | M | Disease&NULL |
| 11 | 116749977 | rs6589577    | C | T | M | Disease | 0.622459331 | M | Disease&NULL |
| 11 | 117937348 | rs61900593   | G | A | M | Disease | 0.622459331 | M | Disease&NULL |
| 11 | 117294706 | rs4420302    | A | G | M | Disease | 0.622459331 | M | Disease&NULL |
| 11 | 116752219 | rs7124741    | A | T | M | Disease | 0.621283595 | M | Disease&NULL |
| 11 | 117285145 | rs1279744828 | G | A | M | Disease | 0.621283595 | M | Disease&NULL |
| 11 | 116478827 | rs12794425   | A | G | M | Disease | 0.621283595 | M | Disease&NULL |
| 11 | 116292287 | rs77544215   | T | C | M | Disease | 0.621283595 | M | Disease&NULL |
| 11 | 116774201 | rs17120139   | A | G | M | Disease | 0.620106432 | M | Disease&NULL |
| 11 | 116478904 | rs12794476   | A | G | M | Disease | 0.620106432 | M | Disease&NULL |
| 11 | 119880519 | rs593252     | A | G | M | Disease | 0.620106432 | M | Disease&NULL |
| 11 | 116932428 | rs6589589    | T | C | M | Disease | 0.620106432 | M | Disease&NULL |
| 11 | 119208576 | rs2509656    | A | G | M | Disease | 0.618927855 | M | Disease&NULL |
| 11 | 116943354 | rs1351452    | A | C | M | Disease | 0.618927855 | M | Disease&NULL |
| 11 | 117291696 | rs1902624    | T | C | M | Disease | 0.618927855 | M | Disease&NULL |
| 11 | 117276783 | rs485570     | G | T | M | Disease | 0.618927855 | M | Disease&NULL |
| 11 | 116941555 | rs151131966  | A | G | M | Disease | 0.620106432 | M | Disease&NULL |
| 11 | 117192383 | rs516742     | G | A | M | Disease | 0.618927855 | M | Disease&NULL |
| 11 | 116908283 | rs7115242    | A | G | M | Disease | 0.618927855 | M | Disease&NULL |
| 11 | 117366280 | rs73008405   | C | G | M | Disease | 0.618927855 | M | Disease&NULL |
| 11 | 117293516 | rs10790183   | A | G | M | Disease | 0.617747875 | M | Disease&NULL |
| 11 | 116957907 | rs6589592    | C | G | M | Disease | 0.617747875 | M | Disease&NULL |
| 11 | 121005609 | rs7128792    | G | A | M | Disease | 0.617747875 | M | Disease&NULL |
| 11 | 116291283 | rs78277728   | G | C | M | Disease | 0.617747875 | M | Disease&NULL |
| 11 | 116296917 | rs79663212   | T | G | M | Disease | 0.616566505 | M | Disease&NULL |
| 11 | 117369450 | rs1075784    | G | C | M | Disease | 0.617747875 | M | Disease&NULL |
| 11 | 116947361 | rs4938335    | A | C | M | Disease | 0.616566505 | M | Disease&NULL |
| 11 | 116950232 | rs10736487   | A | G | M | Disease | 0.616566505 | M | Disease&NULL |
| 11 | 117558945 | rs74778631   | A | G | M | Disease | 0.617747875 | M | Disease&NULL |
| 11 | 118812559 | rs74678032   | C | T | M | Disease | 0.616566505 | M | Disease&NULL |
| 11 | 117295791 | rs7925881    | A | G | M | Disease | 0.616566505 | M | Disease&NULL |
| 11 | 119008125 | rs78210954   | C | G | M | Disease | 0.615383756 | M | Disease&NULL |
| 11 | 117075566 | rs508487     | T | C | M | Disease | 0.615383756 | M | Disease&NULL |
| 11 | 117936239 | rs55965073   | C | T | M | Disease | 0.615383756 | M | Disease&NULL |
| 11 | 116290834 | rs11215925   | C | T | M | Disease | 0.615383756 | M | Disease&NULL |
| 11 | 118220035 | rs2282550    | C | T | M | Disease | 0.615383756 | M | Disease&NULL |
| 11 | 118640063 | rs524590     | T | A | M | Disease | 0.615383756 | M | Disease&NULL |
| 11 | 118652326 | rs1790189    | G | T | M | Disease | 0.614199643 | M | Disease&NULL |
| 11 | 118653629 | rs540180     | T | G | M | Disease | 0.614199643 | M | Disease&NULL |
| 11 | 118654651 | rs2508916    | G | C | M | Disease | 0.614199643 | M | Disease&NULL |
| 11 | 116798963 | rs579890     | A | G | M | Disease | 0.614199643 | M | Disease&NULL |
| 11 | 116812029 | rs473188     | C | G | M | Disease | 0.614199643 | M | Disease&NULL |
| 11 | 120032251 | rs78399857   | T | C | M | Disease | 0.615383756 | M | Disease&NULL |
| 11 | 116693353 | rs2239013    | T | C | M | Disease | 0.614199643 | M | Disease&NULL |
| 11 | 117368846 | rs2004926    | G | A | M | Disease | 0.614199643 | M | Disease&NULL |
| 11 | 118221474 | rs1561966    | A | G | M | Disease | 0.614199643 | M | Disease&NULL |
| 11 | 118652373 | rs1784293    | C | A | M | Disease | 0.614199643 | M | Disease&NULL |
| 11 | 116705719 | rs12718462   | C | T | M | Disease | 0.613014176 | M | Disease&NULL |
| 11 | 120860238 | rs536447     | T | C | M | Disease | 0.613014176 | M | Disease&NULL |
| 11 | 116771375 | rs72645460   | G | A | M | Disease | 0.613014176 | M | Disease&NULL |
| 11 | 117268256 | rs569845     | T | G | M | Disease | 0.613014176 | M | Disease&NULL |
| 11 | 117367574 | rs73008411   | G | A | M | Disease | 0.613014176 | M | Disease&NULL |
| 11 | 118038697 | rs648389     | C | T | M | Disease | 0.613014176 | M | Disease&NULL |
| 11 | 117275815 | rs546617     | A | G | M | Disease | 0.613014176 | M | Disease&NULL |
| 11 | 118995325 | rs7123630    | T | C | M | Disease | 0.613014176 | M | Disease&NULL |
| 11 | 116550916 | rs193204541  | G | C | M | Disease | 0.613014176 | M | Disease&NULL |
| 11 | 116927740 | rs10790172   | G | T | M | Disease | 0.611827369 | M | Disease&NULL |
| 11 | 117293741 | rs3863308    | G | T | M | Disease | 0.610639234 | M | Disease&NULL |
| 11 | 116907113 | rs10732856   | T | C | M | Disease | 0.610639234 | M | Disease&NULL |
| 11 | 117273094 | rs568984     | T | G | M | Disease | 0.610639234 | M | Disease&NULL |

|    |           |             |   |   |  |       |           |           |       |          |
|----|-----------|-------------|---|---|--|-------|-----------|-----------|-------|----------|
| 11 | 120860499 | rs560092    | G | A |  | 0.929 | -7977.388 | -7976.249 | 1.14  | 1.21E-05 |
| 11 | 120861094 | rs565597    | C | T |  | 0.929 | -7977.388 | -7976.25  | 1.139 | 1.21E-05 |
| 11 | 117294973 | rs4938375   | C | T |  | 0.878 | -7977.388 | -7976.257 | 1.132 | 1.20E-05 |
| 11 | 117266466 | rs483837    | C | T |  | 0.879 | -7977.388 | -7976.265 | 1.123 | 1.19E-05 |
| 11 | 117394979 | rs12577702  | C | T |  | 0.881 | -7977.388 | -7976.276 | 1.113 | 1.18E-05 |
| 11 | 116587889 | rs17119920  | G | C |  | 0.849 | -7977.388 | -7976.278 | 1.111 | 1.17E-05 |
| 11 | 117521967 | rs16867     | C | T |  | 1.091 | -7977.388 | -7976.282 | 1.106 | 1.17E-05 |
| 11 | 121079940 | rs78733282  | G | A |  | 0.832 | -7977.388 | -7976.283 | 1.105 | 1.17E-05 |
| 11 | 116197149 | rs12789310  | G | A |  | 0.88  | -7977.388 | -7976.284 | 1.104 | 1.17E-05 |
| 11 | 116966435 | rs900012    | G | A |  | 0.902 | -7977.388 | -7976.285 | 1.103 | 1.17E-05 |
| 11 | 119913501 | rs656015    | A | G |  | 0.93  | -7977.388 | -7976.29  | 1.098 | 1.16E-05 |
| 11 | 116921390 | rs1815786   | T | C |  | 0.897 | -7977.388 | -7976.302 | 1.087 | 1.15E-05 |
| 11 | 117284770 | rs540904    | C | T |  | 0.898 | -7977.388 | -7976.302 | 1.086 | 1.15E-05 |
| 11 | 116202789 | rs12806755  | C | T |  | 0.881 | -7977.388 | -7976.304 | 1.084 | 1.14E-05 |
| 11 | 120861385 | rs595851    | A | G |  | 0.93  | -7977.388 | -7976.304 | 1.084 | 1.14E-05 |
| 11 | 117294959 | rs4936376   | T | C |  | 0.88  | -7977.388 | -7976.314 | 1.075 | 1.13E-05 |
| 11 | 117283626 | rs572884    | G | A |  | 0.898 | -7977.388 | -7976.332 | 1.057 | 1.11E-05 |
| 11 | 117283634 | rs572862    | G | A |  | 0.898 | -7977.388 | -7976.332 | 1.057 | 1.11E-05 |
| 11 | 117258662 | rs574813    | G | C |  | 0.881 | -7977.388 | -7976.334 | 1.054 | 1.11E-05 |
| 11 | 117258687 | rs574873    | T | G |  | 0.881 | -7977.388 | -7976.334 | 1.054 | 1.11E-05 |
| 11 | 118700557 | rs4291686   | G | A |  | 0.931 | -7977.388 | -7976.334 | 1.054 | 1.11E-05 |
| 11 | 117370831 | rs58949729  | T | G |  | 1.119 | -7977.388 | -7976.347 | 1.042 | 1.10E-05 |
| 11 | 117295431 | rs4938376   | G | A |  | 0.88  | -7977.388 | -7976.348 | 1.041 | 1.10E-05 |
| 11 | 117003459 | rs17120373  | G | A |  | 1.117 | -7977.388 | -7976.35  | 1.038 | 1.09E-05 |
| 11 | 117461888 | rs61213686  | C | T |  | 1.115 | -7977.388 | -7976.351 | 1.038 | 1.09E-05 |
| 11 | 117561256 | rs114797458 | A | G |  | 0.83  | -7977.388 | -7976.351 | 1.038 | 1.09E-05 |
| 11 | 120863568 | rs607800    | T | C |  | 0.93  | -7977.388 | -7976.359 | 1.03  | 1.08E-05 |
| 11 | 117489645 | rs685184    | T | C |  | 0.914 | -7977.388 | -7976.364 | 1.025 | 1.08E-05 |
| 11 | 117261853 | rs494553    | T | C |  | 0.882 | -7977.388 | -7976.369 | 1.019 | 1.07E-05 |
| 11 | 119853138 | rs17123519  | T | C |  | 0.86  | -7977.388 | -7976.373 | 1.015 | 1.07E-05 |
| 11 | 118699276 | rs625274    | T | C |  | 0.932 | -7977.388 | -7976.377 | 1.012 | 1.06E-05 |
| 11 | 117296160 | rs10750105  | A | T |  | 0.881 | -7977.388 | -7976.377 | 1.011 | 1.06E-05 |
| 11 | 117368358 | rs73008415  | T | C |  | 0.847 | -7977.388 | -7976.38  | 1.009 | 1.06E-0  |

|    |           |              |   |   |   |         |             |   |              |
|----|-----------|--------------|---|---|---|---------|-------------|---|--------------|
| 11 | 119207341 | rs2248863    | A | G | M | Disease | 0.610639234 | M | Disease&NULL |
| 11 | 119207446 | rs2248853    | T | C | M | Disease | 0.610639234 | M | Disease&NULL |
| 11 | 120239808 | rs116850963  | G | A | M | Disease | 0.611827369 | M | Disease&NULL |
| 11 | 119209979 | rs9640       | A | T | M | Disease | 0.610639234 | M | Disease&NULL |
| 11 | 118583525 | rs10892260   | C | A | M | Disease | 0.610639234 | M | Disease&NULL |
| 11 | 117554152 | rs17121080   | A | G | M | Disease | 0.610639234 | M | Disease&NULL |
| 11 | 117368805 | rs524968     | A | G | M | Disease | 0.609449784 | M | Disease&NULL |
| 11 | 116764021 | rs672058     | C | T | M | Disease | 0.609449784 | M | Disease&NULL |
| 11 | 116915217 | rs2155583    | A | G | M | Disease | 0.609449784 | M | Disease&NULL |
| 11 | 116915819 | rs2000615    | C | T | M | Disease | 0.609449784 | M | Disease&NULL |
| 11 | 117182708 | rs525493     | G | T | M | Disease | 0.609449784 | M | Disease&NULL |
| 11 | 119820707 | rs75829086   | G | C | M | Disease | 0.609449784 | M | Disease&NULL |
| 11 | 117293929 | rs3863310    | C | T | M | Disease | 0.609449784 | M | Disease&NULL |
| 11 | 116819617 | rs1241658    | G | A | M | Disease | 0.608259031 | M | Disease&NULL |
| 11 | 117925812 | rs732403     | A | G | M | Disease | 0.608259031 | M | Disease&NULL |
| 11 | 117938377 | rs61900594   | T | C | M | Disease | 0.608259031 | M | Disease&NULL |
| 11 | 117250861 | rs487261     | T | C | M | Disease | 0.608259031 | M | Disease&NULL |
| 11 | 116923870 | rs7130297    | C | T | M | Disease | 0.608259031 | M | Disease&NULL |
| 11 | 117343197 | rs10892121   | C | T | M | Disease | 0.608259031 | M | Disease&NULL |
| 11 | 116483042 | rs34899605   | A | G | M | Disease | 0.608259031 | M | Disease&NULL |
| 11 | 116917244 | rs10750100   | T | C | M | Disease | 0.607066988 | M | Disease&NULL |
| 11 | 116921397 | rs1815787    | T | C | M | Disease | 0.607066988 | M | Disease&NULL |
| 11 | 118744615 | rs73009445   | A | G | M | Disease | 0.607066988 | M | Disease&NULL |
| 11 | 116813804 | rs510988     | C | T | M | Disease | 0.605873668 | M | Disease&NULL |
| 11 | 116833679 | rs493134     | C | T | M | Disease | 0.605873668 | M | Disease&NULL |
| 11 | 116915742 | rs2000614    | C | T | M | Disease | 0.605873668 | M | Disease&NULL |
| 11 | 116916529 | rs2000616    | C | T | M | Disease | 0.605873668 | M | Disease&NULL |
| 11 | 117179302 | rs663166     | A | G | M | Disease | 0.605873668 | M | Disease&NULL |
| 11 | 116898886 | rs7950364    | C | G | M | Disease | 0.604679085 | M | Disease&NULL |
| 11 | 117551810 | rs78462423   | A | G | M | Disease | 0.604679085 | M | Disease&NULL |
| 11 | 116730638 | rs6589574    | A | G | M | Disease | 0.60348325  | M | Disease&NULL |
| 11 | 117202782 | rs624555     | T | C | M | Disease | 0.60348325  | M | Disease&NULL |
| 11 | 119576357 | rs112791662  | A | G | M | Disease | 0.60348325  | M | Disease&NULL |
| 11 | 117294035 | rs3863311    | A | T | M | Disease | 0.60348325  | M | Disease&NULL |
| 11 | 118577873 | rs11216960   | A | G | M | Disease | 0.60348325  | M | Disease&NULL |
| 11 | 118578705 | rs10892256   | A | G | M | Disease | 0.60348325  | M | Disease&NULL |
| 11 | 117037080 | rs114287696  | G | A | M | Disease | 0.60348325  | M | Disease&NULL |
| 11 | 117489941 | rs683842     | C | G | M | Disease | 0.602286177 | M | Disease&NULL |
| 11 | 116409112 | rs7118201    | C | T | M | Disease | 0.602286177 | M | Disease&NULL |
| 11 | 117560048 | rs7103164    | A | G | M | Disease | 0.60348325  | M | Disease&NULL |
| 11 | 116951943 | rs117033797  | G | T | M | Disease | 0.602286177 | M | Disease&NULL |
| 11 | 116692324 | rs2234668    | A | G | M | Disease | 0.599888369 | M | Disease&NULL |
| 11 | 116735460 | rs17120099   | C | A | M | Disease | 0.599888369 | M | Disease&NULL |
| 11 | 120426966 | rs2248540    | C | T | M | Disease | 0.59868766  | M | Disease&NULL |
| 11 | 120732349 | rs12221530   | T | C | M | Disease | 0.59868766  | M | Disease&NULL |
| 11 | 117255386 | rs480120     | T | C | M | Disease | 0.599888369 | M | Disease&NULL |
| 11 | 117549963 | rs116672969  | A | G | M | Disease | 0.599888369 | M | Disease&NULL |
| 11 | 121018698 | rs34217740   | A | G | M | Disease | 0.59868766  | M | Disease&NULL |
| 11 | 117898446 | rs149421321  | T | C | M | Disease | 0.599888369 | M | Disease&NULL |
| 11 | 117291835 | rs1902626    | C | A | M | Disease | 0.59868766  | M | Disease&NULL |
| 11 | 118798154 | rs60969913   | C | G | M | Disease | 0.59868766  | M | Disease&NULL |
| 11 | 117381052 | rs634606     | T | C | M | Disease | 0.597485766 | M | Disease&NULL |
| 11 | 120418613 | rs2252244    | G | A | M | Disease | 0.597485766 | M | Disease&NULL |
| 11 | 117269269 | rs539573     | A | T | M | Disease | 0.597485766 | M | Disease&NULL |
| 11 | 116199019 | rs75676165   | A | G | M | Disease | 0.597485766 | M | Disease&NULL |
| 11 | 117353812 | rs55900121   | T | C | M | Disease | 0.596282699 | M | Disease&NULL |
| 11 | 117938177 | rs73015719   | A | G | M | Disease | 0.596282699 | M | Disease&NULL |
| 11 | 118227838 | rs11216856   | T | C | M | Disease | 0.596282699 | M | Disease&NULL |
| 11 | 118797544 | rs56032119   | G | A | M | Disease | 0.596282699 | M | Disease&NULL |
| 11 | 118468037 | rs535774     | T | C | M | Disease | 0.596282699 | M | Disease&NULL |
| 11 | 117365915 | rs1359830167 | T | C | M | Disease | 0.596282699 | M | Disease&NULL |
| 11 | 118216423 | rs3212263    | G | A | M | Disease | 0.595078474 | M | Disease&NULL |
| 11 | 121001039 | rs2282565    | C | T | M | Disease | 0.595078474 | M | Disease&NULL |
| 11 | 121001263 | rs7108166    | G | A | M | Disease | 0.595078474 | M | Disease&NULL |
| 11 | 118797392 | rs73575429   | C | T | M | Disease | 0.595078474 | M | Disease&NULL |
| 11 | 118797420 | rs111390501  | G | A | M | Disease | 0.595078474 | M | Disease&NULL |
| 11 | 118797278 | rs74584888   | A | G | M | Disease | 0.593873103 | M | Disease&NULL |
| 11 | 118579327 | rs10892257   | A | G | M | Disease | 0.593873103 | M | Disease&NULL |
| 11 | 117196020 | rs474806     | T | C | M | Disease | 0.593873103 | M | Disease&NULL |
| 11 | 117511787 | rs512017     | G | A | M | Disease | 0.5926666   | M | Disease&NULL |
| 11 | 119404234 | rs149602720  | G | A | M | Disease | 0.595078474 | M | Disease&NULL |
| 11 | 117946941 | rs3758998    | A | C | M | Disease | 0.5926666   | M | Disease&NULL |
| 11 | 118845546 | rs57300701   | G | C | M | Disease | 0.5926666   | M | Disease&NULL |
| 11 | 116806687 | rs2513093    | A | G | M | Disease | 0.591458978 | M | Disease&NULL |
| 11 | 121009383 | rs115076910  | C | T | M | Disease | 0.591458978 | M | Disease&NULL |
| 11 | 117366513 | rs73008407   | T | C | M | Disease | 0.5926666   | M | Disease&NULL |
| 11 | 116882638 | rs4245168    | C | A | M | Disease | 0.591458978 | M | Disease&NULL |
| 11 | 118582613 | rs11216965   | A | C | M | Disease | 0.591458978 | M | Disease&NULL |
| 11 | 118797003 | rs73575428   | G | C | M | Disease | 0.591458978 | M | Disease&NULL |
| 11 | 118678609 | rs2508570    | A | G | M | Disease | 0.590250252 | M | Disease&NULL |
| 11 | 118678881 | rs591756     | T | C | M | Disease | 0.590250252 | M | Disease&NULL |
| 11 | 121010662 | rs624428     | T | C | M | Disease | 0.590250252 | M | Disease&NULL |
| 11 | 117794988 | rs76673375   | C | G | M | Disease | 0.590250252 | M | Disease&NULL |
| 11 | 118811641 | rs11606199   | A | G | M | Disease | 0.590250252 | M | Disease&NULL |
| 11 | 117927488 | rs61900567   | C | G | M | Disease | 0.590250252 | M | Disease&NULL |
| 11 | 118579865 | rs10892258   | A | G | M | Disease | 0.590250252 | M | Disease&NULL |
| 11 | 118580338 | rs11216961   | G | C | M | Disease | 0.590250252 | M | Disease&NULL |
| 11 | 118581895 | rs11216964   | A | G | M | Disease | 0.590250252 | M | Disease&NULL |
| 11 | 117350320 | rs7930881    | A | G | M | Disease | 0.590250252 | M | Disease&NULL |
| 11 | 118664377 | rs598373     | T | C | M | Disease | 0.589040434 | M | Disease&NULL |
| 11 | 118584340 | rs11216969   | C | T | M | Disease | 0.589040434 | M | Disease&NULL |
| 11 | 121009379 | rs34002948   | A | G | M | Disease | 0.589040434 | M | Disease&NULL |
| 11 | 117352381 | rs112746276  | T | A | M | Disease | 0.589040434 | M | Disease&NULL |
| 11 | 118579747 | rs10790261   | G | A | M | Disease | 0.589040434 | M | Disease&NULL |
| 11 | 121192292 | rs2370114    | G | A | M | Disease | 0.589040434 | M | Disease&NULL |
| 11 | 116745484 | rs9919599    | C | G | M | Disease | 0.589040434 | M | Disease&NULL |

|    |           |             |   |   |  |       |           |           |       |          |
|----|-----------|-------------|---|---|--|-------|-----------|-----------|-------|----------|
| 11 | 119207341 | rs2248863   | A | G |  | 1.096 | -7977.388 | -7976.489 | 0.899 | 9.50E-06 |
| 11 | 119207446 | rs2248853   | T | C |  | 1.096 | -7977.388 | -7976.489 | 0.899 | 9.50E-06 |
| 11 | 120239808 | rs116850963 | G | A |  | 0.857 | -7977.388 | -7976.489 | 0.899 | 9.50E-06 |
| 11 | 119209979 | rs9640      | A | T |  | 1.096 | -7977.388 | -7976.489 | 0.898 | 9.50E-06 |
| 11 | 118583525 | rs10892260  | C | A |  | 1.082 | -7977.388 | -7976.491 | 0.897 | 9.49E-06 |
| 11 | 117554152 | rs17121080  | A | G |  | 0.841 | -7977.388 | -7976.495 | 0.893 | 9.45E-06 |
| 11 | 117368805 | rs524968    | A | G |  | 0.932 | -7977.388 | -7976.496 | 0.892 | 9.44E-06 |
| 11 | 116764021 | rs672058    | C | T |  | 0.91  | -7977.388 | -7976.497 | 0.891 | 9.43E-06 |
| 11 | 116915217 | rs2155583   | A | G |  | 0.906 | -7977.388 | -7976.5   | 0.888 | 9.40E-06 |
| 11 | 116915819 | rs2000615   | C | T |  | 0.906 | -7977.388 | -7976.5   | 0.888 | 9.40E-06 |
| 11 | 117182708 | rs525493    | G | T |  | 0.934 | -7977.388 | -7976.501 | 0.887 | 9.39E-06 |
| 11 | 119820707 | rs75829086  | G | C |  | 0.851 | -7977.388 | -7976.504 | 0.884 | 9.36E-06 |
| 11 | 117293929 | rs3863310   | C | T |  | 0.885 | -7977.388 | -7976.507 | 0.882 | 9.34E-06 |
| 11 | 116819617 | rs1241658   | G | A |  | 0.906 | -7977.388 | -7976.507 | 0.881 | 9.34E-06 |
| 11 | 117925812 | rs732403    | A | G |  | 0.931 | -7977.388 | -7976.51  | 0.879 | 9.32E-06 |
| 11 | 117938377 | rs61900594  | T | C |  | 0.931 | -7977.388 | -7976.51  | 0.879 | 9.32E-06 |
| 11 | 117205861 | rs487261    | T | C |  | 0.886 | -7977.388 | -7976.512 | 0.876 | 9.29E-06 |
| 11 | 116923870 | rs7130297   | C | T |  | 0.907 | -7977.388 | -7976.514 | 0.875 | 9.28E-06 |
| 11 | 117343197 | rs10892121  | C | T |  | 1.082 | -7977.388 | -7976.514 | 0.874 | 9.27E-06 |
| 11 | 116483042 | rs34899605  | A | G |  | 0.884 | -7977.388 | -7976.516 | 0.872 | 9.25E-06 |
| 11 | 116917244 | rs10750100  | T | C |  | 0.907 | -7977.388 | -7976.518 | 0.87  | 9.23E-06 |
| 11 | 116921397 | rs1815787   | T | C |  | 0.907 | -7977.388 | -7976.518 | 0.87  | 9.23E-06 |
| 11 | 118744615 | rs73009445  | A | G |  | 0.881 | -7977.388 | -7976.519 | 0.869 | 9.22E-06 |
| 11 | 116813804 | rs510988    | C | T |  | 0.907 | -7977.388 | -7976.528 | 0.861 | 9.15E-06 |
| 11 | 116833679 | rs493134    | C | T |  | 0.907 | -7977.388 | -7976.532 | 0.856 | 9.10E-06 |
| 11 | 116915742 | rs2000614   | C | T |  | 0.907 | -7977.388 | -7976.533 | 0.855 | 9.10E-06 |
| 11 | 116916529 | rs2000616   | C | T |  | 0.907 | -7977.388 | -7976.533 | 0.855 | 9.10E-06 |
| 11 | 117179302 | rs663166    | A | G |  | 0.873 | -7977.388 | -7976.539 | 0.849 | 9.04E-06 |
| 11 | 116898886 | rs7950364   | C | G |  | 0.907 | -7977.388 | -7976.54  | 0.848 | 9.03E-06 |
| 11 | 117551810 | rs78462423  | A | G |  | 0.843 | -7977.388 | -7976.545 | 0.843 | 8.99E-06 |
| 11 | 116730638 | rs6589574   | A | G |  | 0.901 | -7977.388 | -7976.547 | 0.841 | 8.97E-06 |
| 11 | 117202782 | rs624555    | T | C |  | 0.887 | -7977.388 | -7976.551 | 0.838 | 8.94E-06 |
| 11 | 119576357 | rs112791662 | A | G |  | 0.867 | -7977.388 | -7976.55  | 0     |          |

|    |           |              |   |   |   |         |             |   |              |
|----|-----------|--------------|---|---|---|---------|-------------|---|--------------|
| 11 | 117372488 | rs17092713   | A | G | M | Disease | 0.589040434 | M | Disease&NULL |
| 11 | 117925668 | rs2105590    | A | G | M | Disease | 0.589040434 | M | Disease&NULL |
| 11 | 118677710 | rs688161     | G | A | M | Disease | 0.589040434 | M | Disease&NULL |
| 11 | 120408071 | rs3901366    | A | G | M | Disease | 0.589040434 | M | Disease&NULL |
| 11 | 119859583 | rs3740725    | A | G | M | Disease | 0.589040434 | M | Disease&NULL |
| 11 | 116679155 | rs75542613   | A | G | M | Disease | 0.589040434 | M | Disease&NULL |
| 11 | 118230223 | rs2276417    | G | T | M | Disease | 0.587829538 | M | Disease&NULL |
| 11 | 119863505 | rs11217617   | T | C | M | Disease | 0.587829538 | M | Disease&NULL |
| 11 | 120614648 | rs17245685   | C | T | M | Disease | 0.587829538 | M | Disease&NULL |
| 11 | 120998225 | rs74736885   | G | A | M | Disease | 0.587829538 | M | Disease&NULL |
| 11 | 117926770 | rs61900566   | G | A | M | Disease | 0.587829538 | M | Disease&NULL |
| 11 | 120424740 | rs2508656    | A | G | M | Disease | 0.587829538 | M | Disease&NULL |
| 11 | 117364821 | rs12286920   | A | G | M | Disease | 0.587829538 | M | Disease&NULL |
| 11 | 116824884 | rs511676     | T | G | M | Disease | 0.586617579 | M | Disease&NULL |
| 11 | 116199020 | rs77520149   | A | C | M | Disease | 0.585404569 | M | Disease&NULL |
| 11 | 117932042 | rs1939128    | T | C | M | Disease | 0.585404569 | M | Disease&NULL |
| 11 | 118583002 | rs10892259   | A | G | M | Disease | 0.585404569 | M | Disease&NULL |
| 11 | 116682668 | rs149137426  | A | T | M | Disease | 0.586617579 | M | Disease&NULL |
| 11 | 116702630 | rs140223477  | A | G | M | Disease | 0.586617579 | M | Disease&NULL |
| 11 | 117925751 | rs2096721    | T | C | M | Disease | 0.584190523 | M | Disease&NULL |
| 11 | 120417190 | rs2252385    | C | T | M | Disease | 0.584190523 | M | Disease&NULL |
| 11 | 117364120 | rs1395475712 | T | C | M | Disease | 0.584190523 | M | Disease&NULL |
| 11 | 116806269 | rs2513095    | T | C | M | Disease | 0.584190523 | M | Disease&NULL |
| 11 | 116706047 | rs12721025   | A | G | M | Disease | 0.584190523 | M | Disease&NULL |
| 11 | 116308219 | rs10891976   | T | A | M | Disease | 0.584190523 | M | Disease&NULL |
| 11 | 118575326 | rs11216956   | A | G | M | Disease | 0.584190523 | M | Disease&NULL |
| 11 | 116488133 | rs576266     | C | T | M | Disease | 0.582975454 | M | Disease&NULL |
| 11 | 116860045 | rs2508569    | C | G | M | Disease | 0.582975454 | M | Disease&NULL |
| 11 | 118619948 | rs112143902  | T | C | M | Disease | 0.582975454 | M | Disease&NULL |
| 11 | 116715784 | rs142174850  | A | G | M | Disease | 0.582975454 | M | Disease&NULL |
| 11 | 116862818 | rs607273     | A | T | M | Disease | 0.582975454 | M | Disease&NULL |
| 11 | 117165046 | rs150308863  | T | C | M | Disease | 0.581759377 | M | Disease&NULL |
| 11 | 118678986 | rs477014     | C | T | M | Disease | 0.581759377 | M | Disease&NULL |
| 11 | 118679387 | rs473298     | G | A | M | Disease | 0.581759377 | M | Disease&NULL |
| 11 | 118679445 | rs516719     | C | T | M | Disease | 0.581759377 | M | Disease&NULL |
| 11 | 121037554 | rs615697     | C | T | M | Disease | 0.581759377 | M | Disease&NULL |
| 11 | 121037670 | rs616184     | A | G | M | Disease | 0.581759377 | M | Disease&NULL |
| 11 | 120011880 | rs61900473   | A | G | M | Disease | 0.581759377 | M | Disease&NULL |
| 11 | 116753552 | rs12275565   | G | A | M | Disease | 0.581759377 | M | Disease&NULL |
| 11 | 117795671 | rs77018736   | A | G | M | Disease | 0.581759377 | M | Disease&NULL |
| 11 | 120412169 | rs2253023    | T | C | M | Disease | 0.580542305 | M | Disease&NULL |
| 11 | 121037530 | rs489985     | A | G | M | Disease | 0.580542305 | M | Disease&NULL |
| 11 | 118042606 | rs76248354   | A | G | M | Disease | 0.580542305 | M | Disease&NULL |
| 11 | 116488591 | rs3017773    | G | T | M | Disease | 0.580542305 | M | Disease&NULL |
| 11 | 116488610 | rs2105611    | A | G | M | Disease | 0.580542305 | M | Disease&NULL |
| 11 | 116488978 | rs529618     | A | G | M | Disease | 0.580542305 | M | Disease&NULL |
| 11 | 117514378 | rs11216479   | T | C | M | Disease | 0.580542305 | M | Disease&NULL |
| 11 | 117271499 | rs7928581    | C | T | M | Disease | 0.580542305 | M | Disease&NULL |
| 11 | 116866290 | rs7931770    | C | T | M | Disease | 0.580542305 | M | Disease&NULL |
| 11 | 120723057 | rs4331109    | G | A | M | Disease | 0.579324252 | M | Disease&NULL |
| 11 | 116856642 | rs588918     | T | C | M | Disease | 0.579324252 | M | Disease&NULL |
| 11 | 116748515 | rs12292614   | G | A | M | Disease | 0.579324252 | M | Disease&NULL |
| 11 | 116748744 | rs12286581   | C | T | M | Disease | 0.579324252 | M | Disease&NULL |
| 11 | 116749072 | rs75294699   | A | C | M | Disease | 0.579324252 | M | Disease&NULL |
| 11 | 116754265 | rs12416987   | C | T | M | Disease | 0.579324252 | M | Disease&NULL |
| 11 | 116756183 | rs2044426    | A | G | M | Disease | 0.579324252 | M | Disease&NULL |
| 11 | 116756986 | rs10892040   | A | G | M | Disease | 0.579324252 | M | Disease&NULL |
| 11 | 116757248 | rs11216174   | G | A | M | Disease | 0.579324252 | M | Disease&NULL |
| 11 | 116757398 | rs11216175   | T | C | M | Disease | 0.579324252 | M | Disease&NULL |
| 11 | 116757793 | rs12284346   | C | T | M | Disease | 0.579324252 | M | Disease&NULL |
| 11 | 119881267 | rs2018774    | T | A | M | Disease | 0.579324252 | M | Disease&NULL |
| 11 | 116726709 | rs112618266  | T | C | M | Disease | 0.579324252 | M | Disease&NULL |
| 11 | 116759824 | rs12294191   | G | A | M | Disease | 0.579324252 | M | Disease&NULL |
| 11 | 120607334 | rs11604129   | G | A | M | Disease | 0.579324252 | M | Disease&NULL |
| 11 | 119583742 | rs11217420   | A | G | M | Disease | 0.578105233 | M | Disease&NULL |
| 11 | 117997570 | rs1786193    | A | T | M | Disease | 0.578105233 | M | Disease&NULL |
| 11 | 121034491 | rs580683     | T | C | M | Disease | 0.578105233 | M | Disease&NULL |
| 11 | 118598138 | rs543692     | C | T | M | Disease | 0.576885261 | M | Disease&NULL |
| 11 | 116747282 | rs17120119   | G | C | M | Disease | 0.578105233 | M | Disease&NULL |
| 11 | 116748169 | rs12278117   | A | G | M | Disease | 0.578105233 | M | Disease&NULL |
| 11 | 116748221 | rs12279433   | T | G | M | Disease | 0.578105233 | M | Disease&NULL |
| 11 | 120849685 | rs2155094    | A | G | M | Disease | 0.576885261 | M | Disease&NULL |
| 11 | 117180921 | rs583161     | T | C | M | Disease | 0.576885261 | M | Disease&NULL |
| 11 | 120428959 | rs12575259   | A | G | M | Disease | 0.576885261 | M | Disease&NULL |
| 11 | 117424804 | rs11216452   | A | G | M | Disease | 0.576885261 | M | Disease&NULL |
| 11 | 116875983 | rs7114963    | T | C | M | Disease | 0.576885261 | M | Disease&NULL |
| 11 | 121011269 | rs561195     | A | C | M | Disease | 0.575664351 | M | Disease&NULL |
| 11 | 117987573 | rs640012     | C | T | M | Disease | 0.576885261 | M | Disease&NULL |
| 11 | 119936873 | rs79345551   | A | G | M | Disease | 0.575664351 | M | Disease&NULL |
| 11 | 116707401 | rs12718464   | A | G | M | Disease | 0.575664351 | M | Disease&NULL |
| 11 | 120715346 | rs35168282   | A | G | M | Disease | 0.575664351 | M | Disease&NULL |
| 11 | 116867209 | rs7121347    | G | T | M | Disease | 0.575664351 | M | Disease&NULL |
| 11 | 121021940 | rs7122110    | G | A | M | Disease | 0.575664351 | M | Disease&NULL |
| 11 | 117200638 | rs1261791    | A | T | M | Disease | 0.575664351 | M | Disease&NULL |
| 11 | 118038741 | rs647975     | T | C | M | Disease | 0.575664351 | M | Disease&NULL |
| 11 | 121039234 | rs4936590    | C | T | M | Disease | 0.574442517 | M | Disease&NULL |
| 11 | 117903210 | rs17598956   | C | T | M | Disease | 0.573219773 | M | Disease&NULL |
| 11 | 117207122 | rs524914     | C | G | M | Disease | 0.573219773 | M | Disease&NULL |
| 11 | 117512831 | rs480801     | C | T | M | Disease | 0.573219773 | M | Disease&NULL |
| 11 | 120275234 | rs35659242   | G | T | M | Disease | 0.573219773 | M | Disease&NULL |
| 11 | 117350336 | rs2155393    | A | G | M | Disease | 0.573219773 | M | Disease&NULL |
| 11 | 120405162 | rs2508652    | T | C | M | Disease | 0.573219773 | M | Disease&NULL |
| 11 | 117903836 | rs4936417    | C | T | M | Disease | 0.571996133 | M | Disease&NULL |
| 11 | 118580813 | rs11216962   | C | T | M | Disease | 0.571996133 | M | Disease&NULL |
| 11 | 118580814 | rs11216963   | A | G | M | Disease | 0.571996133 | M | Disease&NULL |
| 11 | 117987391 | rs603678     | C | T | M | Disease | 0.571996133 | M | Disease&NULL |

|    |           |              |   |   |  |       |           |           |       |          |
|----|-----------|--------------|---|---|--|-------|-----------|-----------|-------|----------|
| 11 | 117372488 | rs17092713   | A | G |  | 0.863 | -7977.388 | -7976.673 | 0.715 | 7.91E-06 |
| 11 | 117925668 | rs2105590    | A | G |  | 0.933 | -7977.388 | -7976.673 | 0.715 | 7.91E-06 |
| 11 | 118677710 | rs688161     | G | A |  | 1.072 | -7977.388 | -7976.674 | 0.715 | 7.91E-06 |
| 11 | 120408071 | rs3901366    | A | G |  | 0.932 | -7977.388 | -7976.674 | 0.714 | 7.90E-06 |
| 11 | 119859583 | rs3740725    | A | G |  | 0.872 | -7977.388 | -7976.676 | 0.713 | 7.89E-06 |
| 11 | 116679155 | rs75542613   | A | G |  | 1.12  | -7977.388 | -7976.678 | 0.711 | 7.88E-06 |
| 11 | 118230223 | rs2276417    | G | T |  | 1.074 | -7977.388 | -7976.68  | 0.708 | 7.85E-06 |
| 11 | 119863505 | rs11217617   | T | C |  | 0.872 | -7977.388 | -7976.681 | 0.708 | 7.85E-06 |
| 11 | 120614648 | rs17245685   | C | T |  | 0.888 | -7977.388 | -7976.681 | 0.707 | 7.84E-06 |
| 11 | 120998225 | rs74736885   | G | A |  | 0.906 | -7977.388 | -7976.682 | 0.707 | 7.84E-06 |
| 11 | 117926770 | rs61900566   | G | A |  | 0.933 | -7977.388 | -7976.684 | 0.705 | 7.83E-06 |
| 11 | 120424740 | rs2508656    | A | G |  | 0.883 | -7977.388 | -7976.683 | 0.705 | 7.83E-06 |
| 11 | 117364821 | rs12286920   | A | G |  | 1.08  | -7977.388 | -7976.685 | 0.703 | 7.81E-06 |
| 11 | 116824884 | rs511676     | T | G |  | 0.91  | -7977.388 | -7976.689 | 0.7   | 7.79E-06 |
| 11 | 116199020 | rs77520149   | A | C |  | 1.114 | -7977.388 | -7976.701 | 0.687 | 7.69E-06 |
| 11 | 117932042 | rs1939128    | T | C |  | 0.933 | -7977.388 | -7976.701 | 0.687 | 7.69E-06 |
| 11 | 118583002 | rs10892259   | A | G |  | 1.079 | -7977.388 | -7976.702 | 0.686 | 7.68E-06 |
| 11 | 116682668 | rs149137426  | A | T |  | 0.846 | -7977.388 | -7976.704 | 0.684 | 7.67E-06 |
| 11 | 116702630 | rs140223477  | A | G |  | 1.176 | -7977.388 | -7976.704 | 0.684 | 7.67E-06 |
| 11 | 117925751 | rs2096721    | T | C |  | 0.933 | -7977.388 | -7976.706 | 0.682 | 7.65E-06 |
| 11 | 120417190 | rs2252385    | C | T |  | 0.933 | -7977.388 | -7976.707 | 0.681 | 7.64E-06 |
| 11 | 117364120 | rs1395475712 | T | C |  | 1.07  | -7977.388 | -7976.708 | 0.68  | 7.64E-06 |
| 11 | 116806269 | rs2513095    | T | C |  | 0.91  | -7977.388 | -7976.712 | 0.677 | 7.61E-06 |
| 11 | 116706047 | rs12721025   | A | G |  | 1.123 | -7977.388 | -7976.714 | 0.674 | 7.59E-06 |
| 11 | 116308219 | rs10891976   | T | A |  | 0.936 | -7977.388 | -7976.715 | 0.673 | 7.58E-06 |
| 11 | 118575326 | rs11216956   | A | G |  | 1.078 | -7977.388 | -7976.715 | 0.673 | 7.58E-06 |
| 11 | 116488133 | rs576266     | C | T |  | 0.909 | -7977.388 | -7976.719 | 0.67  | 7.56E-06 |
| 11 | 116860045 | rs2508569    | C | G |  | 1.072 | -7977.388 | -7976.719 | 0.669 | 7.55E-06 |
| 11 | 118619948 | rs112143902  | T | C |  | 0.903 | -7977.388 | -7976.722 | 0.666 | 7.53E-06 |
| 11 | 116715784 | rs142174850  | A | G |  | 1.124 | -7977.388 | -7976.723 | 0.665 | 7.52E-06 |
| 11 | 116862818 | rs607273     | A | T |  | 0.906 | -7977.388 | -7976.725 | 0.664 | 7.51E-06 |
| 11 | 117165046 | rs150308863  | T | C |  | 0.879 | -7977.388 | -7976.731 | 0.658 | 7.47E-06 |
| 11 | 118678986 | rs477014     | C | T |  |       |           |           |       |          |

|    |           |             |   |   |   |         |             |   |              |
|----|-----------|-------------|---|---|---|---------|-------------|---|--------------|
| 11 | 118279936 | rs3194726   | C | T | M | Disease | 0.570771612 | M | Disease&NULL |
| 11 | 116299456 | rs144466751 | C | T | M | Disease | 0.570771612 | M | Disease&NULL |
| 11 | 121062486 | rs7110565   | C | T | M | Disease | 0.570771612 | M | Disease&NULL |
| 11 | 120425101 | rs79985686  | C | T | M | Disease | 0.570771612 | M | Disease&NULL |
| 11 | 118519213 | rs668628    | T | G | M | Disease | 0.569546224 | M | Disease&NULL |
| 11 | 119864218 | rs874195    | G | A | M | Disease | 0.570771612 | M | Disease&NULL |
| 11 | 119880819 | rs675246    | T | C | M | Disease | 0.569546224 | M | Disease&NULL |
| 11 | 117034899 | rs189189723 | T | G | M | Disease | 0.569546224 | M | Disease&NULL |
| 11 | 117308183 | rs73592180  | G | A | M | Disease | 0.569546224 | M | Disease&NULL |
| 11 | 117449497 | rs11606425  | T | A | M | Disease | 0.569546224 | M | Disease&NULL |
| 11 | 116758693 | rs12292278  | C | A | M | Disease | 0.568319983 | M | Disease&NULL |
| 11 | 121015968 | rs4936583   | C | T | M | Disease | 0.568319983 | M | Disease&NULL |
| 11 | 121016098 | rs10892676  | C | T | M | Disease | 0.568319983 | M | Disease&NULL |
| 11 | 121016145 | rs4936584   | A | G | M | Disease | 0.568319983 | M | Disease&NULL |
| 11 | 121016818 | rs12275038  | A | G | M | Disease | 0.568319983 | M | Disease&NULL |
| 11 | 119519217 | rs11217372  | G | C | M | Disease | 0.568319983 | M | Disease&NULL |
| 11 | 120430224 | rs80260914  | G | A | M | Disease | 0.568319983 | M | Disease&NULL |
| 11 | 120425797 | rs12575945  | A | C | M | Disease | 0.567092905 | M | Disease&NULL |
| 11 | 117449263 | rs11604377  | C | T | M | Disease | 0.565865003 | M | Disease&NULL |
| 11 | 118809882 | rs11217099  | A | C | M | Disease | 0.565865003 | M | Disease&NULL |
| 11 | 117004656 | rs11216288  | T | C | M | Disease | 0.565865003 | M | Disease&NULL |
| 11 | 117386067 | rs2186762   | A | C | M | Disease | 0.565865003 | M | Disease&NULL |
| 11 | 118574311 | rs524409    | T | C | M | Disease | 0.564636292 | M | Disease&NULL |
| 11 | 118574675 | rs494459    | T | C | M | Disease | 0.564636292 | M | Disease&NULL |
| 11 | 116771226 | rs117640781 | T | C | M | Disease | 0.565865003 | M | Disease&NULL |
| 11 | 120719994 | rs11218030  | G | A | M | Disease | 0.564636292 | M | Disease&NULL |
| 11 | 118573916 | rs627391    | T | A | M | Disease | 0.563406786 | M | Disease&NULL |
| 11 | 118575011 | rs530901    | C | T | M | Disease | 0.563406786 | M | Disease&NULL |
| 11 | 118575180 | rs626645    | C | T | M | Disease | 0.563406786 | M | Disease&NULL |
| 11 | 118575419 | rs625735    | A | G | M | Disease | 0.563406786 | M | Disease&NULL |
| 11 | 118575479 | rs637563    | G | A | M | Disease | 0.563406786 | M | Disease&NULL |
| 11 | 118575693 | rs638514    | C | T | M | Disease | 0.563406786 | M | Disease&NULL |
| 11 | 116801201 | rs645258    | A | C | M | Disease | 0.563406786 | M | Disease&NULL |
| 11 | 120521305 | rs7125158   | C | A | M | Disease | 0.564636292 | M | Disease&NULL |
| 11 | 119870780 | rs11217623  | T | C | M | Disease | 0.563406786 | M | Disease&NULL |
| 11 | 120431744 | rs7121316   | A | G | M | Disease | 0.563406786 | M | Disease&NULL |
| 11 | 121011258 | rs561227    | T | C | M | Disease | 0.563406786 | M | Disease&NULL |
| 11 | 118573894 | rs576283    | G | A | M | Disease | 0.562176501 | M | Disease&NULL |
| 11 | 118184271 | rs2231445   | C | T | M | Disease | 0.563406786 | M | Disease&NULL |
| 11 | 116491621 | rs507262    | G | A | M | Disease | 0.562176501 | M | Disease&NULL |
| 11 | 116492312 | rs534633    | G | A | M | Disease | 0.562176501 | M | Disease&NULL |
| 11 | 121012492 | rs581786    | C | T | M | Disease | 0.562176501 | M | Disease&NULL |
| 11 | 121012693 | rs528958    | T | G | M | Disease | 0.562176501 | M | Disease&NULL |
| 11 | 121012831 | rs688106    | A | T | M | Disease | 0.562176501 | M | Disease&NULL |
| 11 | 121012978 | rs665743    | A | G | M | Disease | 0.562176501 | M | Disease&NULL |
| 11 | 117922730 | rs17599289  | T | C | M | Disease | 0.562176501 | M | Disease&NULL |
| 11 | 121018870 | rs4623911   | G | A | M | Disease | 0.562176501 | M | Disease&NULL |
| 11 | 121018999 | rs4641485   | G | A | M | Disease | 0.562176501 | M | Disease&NULL |
| 11 | 119921812 | rs586112    | C | G | M | Disease | 0.562176501 | M | Disease&NULL |
| 11 | 117908084 | rs61900560  | C | G | M | Disease | 0.56094545  | M | Disease&NULL |
| 11 | 118751326 | rs10892306  | A | T | M | Disease | 0.562176501 | M | Disease&NULL |
| 11 | 116990959 | rs4516002   | A | G | M | Disease | 0.56094545  | M | Disease&NULL |
| 11 | 117197621 | rs680908    | G | C | M | Disease | 0.562176501 | M | Disease&NULL |
| 11 | 117198638 | rs566155    | C | T | M | Disease | 0.562176501 | M | Disease&NULL |
| 11 | 121018488 | rs12285468  | C | T | M | Disease | 0.56094545  | M | Disease&NULL |
| 11 | 120431935 | rs12283999  | G | C | M | Disease | 0.56094545  | M | Disease&NULL |
| 11 | 116511522 | rs519000    | T | C | M | Disease | 0.56094545  | M | Disease&NULL |
| 11 | 119866879 | rs9787805   | C | G | M | Disease | 0.56094545  | M | Disease&NULL |
| 11 | 116805204 | rs562179    | T | C | M | Disease | 0.56094545  | M | Disease&NULL |
| 11 | 117915445 | rs7926330   | T | C | M | Disease | 0.56094545  | M | Disease&NULL |
| 11 | 116295218 | rs75375536  | G | A | M | Disease | 0.56094545  | M | Disease&NULL |
| 11 | 121007777 | rs4936580   | A | G | M | Disease | 0.56094545  | M | Disease&NULL |
| 11 | 116491177 | rs502816    | A | C | M | Disease | 0.56094545  | M | Disease&NULL |
| 11 | 116491428 | rs505397    | G | T | M | Disease | 0.56094545  | M | Disease&NULL |
| 11 | 117181919 | rs497902    | G | C | M | Disease | 0.559713649 | M | Disease&NULL |
| 11 | 121014228 | rs11218158  | G | A | M | Disease | 0.559713649 | M | Disease&NULL |
| 11 | 121014459 | rs877538    | A | C | M | Disease | 0.559713649 | M | Disease&NULL |
| 11 | 121014860 | rs7114879   | T | C | M | Disease | 0.559713649 | M | Disease&NULL |
| 11 | 121010788 | rs607014    | A | G | M | Disease | 0.558481112 | M | Disease&NULL |
| 11 | 121017604 | rs7120647   | C | T | M | Disease | 0.558481112 | M | Disease&NULL |
| 11 | 121017863 | rs4936586   | A | C | M | Disease | 0.558481112 | M | Disease&NULL |
| 11 | 121018007 | rs4936587   | G | A | M | Disease | 0.558481112 | M | Disease&NULL |
| 11 | 121018485 | rs12285467  | C | T | M | Disease | 0.558481112 | M | Disease&NULL |
| 11 | 117183914 | rs477036    | C | T | M | Disease | 0.558481112 | M | Disease&NULL |
| 11 | 119866718 | rs9787801   | A | G | M | Disease | 0.559713649 | M | Disease&NULL |
| 11 | 121014983 | rs7114915   | G | A | M | Disease | 0.558481112 | M | Disease&NULL |
| 11 | 117402325 | rs61350190  | T | G | M | Disease | 0.558481112 | M | Disease&NULL |
| 11 | 121011485 | rs638463    | C | T | M | Disease | 0.558481112 | M | Disease&NULL |
| 11 | 116839761 | rs1241657   | T | C | M | Disease | 0.558481112 | M | Disease&NULL |
| 11 | 120412823 | rs2510876   | G | A | M | Disease | 0.558481112 | M | Disease&NULL |
| 11 | 117541718 | rs141116752 | T | C | M | Disease | 0.558481112 | M | Disease&NULL |
| 11 | 121010820 | rs606674    | G | A | M | Disease | 0.557247855 | M | Disease&NULL |
| 11 | 118816156 | rs587263    | C | T | M | Disease | 0.557247855 | M | Disease&NULL |
| 11 | 120413117 | rs2266132   | T | G | M | Disease | 0.557247855 | M | Disease&NULL |
| 11 | 121009800 | rs620778    | T | C | M | Disease | 0.557247855 | M | Disease&NULL |
| 11 | 121017795 | rs4936585   | T | G | M | Disease | 0.557247855 | M | Disease&NULL |
| 11 | 117430750 | rs4936386   | T | C | M | Disease | 0.558481112 | M | Disease&NULL |
| 11 | 119907777 | rs642878    | A | G | M | Disease | 0.558481112 | M | Disease&NULL |
| 11 | 121010116 | rs620164    | A | G | M | Disease | 0.557247855 | M | Disease&NULL |
| 11 | 121009384 | rs115903909 | A | G | M | Disease | 0.557247855 | M | Disease&NULL |
| 11 | 119904686 | rs1287591   | T | C | M | Disease | 0.556013891 | M | Disease&NULL |
| 11 | 116585625 | rs34100096  | A | G | M | Disease | 0.557247855 | M | Disease&NULL |
| 11 | 117987605 | rs640048    | G | T | M | Disease | 0.557247855 | M | Disease&NULL |
| 11 | 117033406 | rs4288786   | A | G | M | Disease | 0.557247855 | M | Disease&NULL |
| 11 | 121018451 | rs7108594   | G | A | M | Disease | 0.556013891 | M | Disease&NULL |
| 11 | 119304622 | rs61898858  | G | A | M | Disease | 0.556013891 | M | Disease&NULL |

|    |           |             |   |   |  |       |           |           |       |          |
|----|-----------|-------------|---|---|--|-------|-----------|-----------|-------|----------|
| 11 | 118279936 | rs3194726   | C | T |  | 1.107 | -7977.388 | -7976.82  | 0.568 | 6.83E-06 |
| 11 | 116299456 | rs144466751 | C | T |  | 1.122 | -7977.388 | -7976.823 | 0.566 | 6.81E-06 |
| 11 | 121062486 | rs7110565   | C | T |  | 0.928 | -7977.388 | -7976.824 | 0.564 | 6.80E-06 |
| 11 | 120425101 | rs79985686  | C | T |  | 0.886 | -7977.388 | -7976.826 | 0.562 | 6.79E-06 |
| 11 | 118519213 | rs668628    | T | G |  | 0.923 | -7977.388 | -7976.827 | 0.561 | 6.78E-06 |
| 11 | 119864218 | rs874195    | G | A |  | 0.877 | -7977.388 | -7976.83  | 0.558 | 6.76E-06 |
| 11 | 119880819 | rs675246    | T | C |  | 0.891 | -7977.388 | -7976.83  | 0.558 | 6.76E-06 |
| 11 | 117034899 | rs189189723 | T | G |  | 1.146 | -7977.388 | -7976.831 | 0.557 | 6.75E-06 |
| 11 | 117308183 | rs73592180  | G | A |  | 1.095 | -7977.388 | -7976.831 | 0.557 | 6.75E-06 |
| 11 | 117449497 | rs11606425  | T | A |  | 1.07  | -7977.388 | -7976.831 | 0.557 | 6.75E-06 |
| 11 | 116758693 | rs12292278  | C | A |  | 1.119 | -7977.388 | -7976.839 | 0.549 | 6.70E-06 |
| 11 | 121015968 | rs4936583   | C | T |  | 0.928 | -7977.388 | -7976.84  | 0.548 | 6.69E-06 |
| 11 | 121016098 | rs10892676  | C | T |  | 0.928 | -7977.388 | -7976.842 | 0.546 | 6.68E-06 |
| 11 | 121016145 | rs4936584   | A | G |  | 0.928 | -7977.388 | -7976.842 | 0.546 | 6.68E-06 |
| 11 | 121016818 | rs12275038  | A | G |  | 0.928 | -7977.388 | -7976.842 | 0.546 | 6.68E-06 |
| 11 | 119519217 | rs11217372  | G | C |  | 0.908 | -7977.388 | -7976.845 | 0.543 | 6.66E-06 |
| 11 | 120430224 | rs80260914  | G | A |  | 0.886 | -7977.388 | -7976.846 | 0.543 | 6.66E-06 |
| 11 | 120425797 | rs12575945  | A | C |  | 0.887 | -7977.388 | -7976.853 | 0.536 | 6.61E-06 |
| 11 | 117449263 | rs11604377  | C | T |  | 1.07  | -7977.388 | -7976.857 | 0.531 | 6.58E-06 |
| 11 | 118809882 | rs11217099  | A | C |  | 1.085 | -7977.388 | -7976.858 | 0.531 | 6.58E-06 |
| 11 | 117004656 | rs11216288  | T | C |  | 0.896 | -7977.388 | -7976.862 | 0.527 | 6.55E-06 |
| 11 | 117386067 | rs2186762   | A | C |  | 0.938 | -7977.388 | -7976.865 | 0.524 | 6.53E-06 |
| 11 | 118574311 | rs524409    | T | C |  | 0.937 | -7977.388 | -7976.866 | 0.522 | 6.52E-06 |
| 11 | 118574675 | rs494459    | T | C |  | 0.937 | -7977.388 | -7976.866 | 0.522 | 6.52E-06 |
| 11 | 116771226 | rs117640781 | T | C |  | 1.165 | -7977.388 | -7976.87  | 0.518 | 6.49E-06 |
| 11 | 120719994 | rs11218030  | G | A |  | 1.082 | -7977.388 | -7976.871 | 0.517 | 6.49E-06 |
| 11 | 118573916 | rs627391    | T | A |  | 0.938 | -7977.388 | -7976.876 | 0.512 | 6.45E-06 |
| 11 | 118575011 | rs530901    | C | T |  | 0.938 | -7977.388 | -7976.876 | 0.512 | 6.45E-06 |
| 11 | 118575180 | rs626645    | C | T |  | 0.938 | -7977.388 | -7976.876 | 0.512 | 6.45E-06 |
| 11 | 118575419 | rs625735    | A | G |  | 0.938 | -7977.388 | -7976.876 | 0.512 | 6.45E-06 |
| 11 | 118575479 | rs637563    | G | A |  | 0.938 | -7977.388 | -7976.876 | 0.512 | 6.45E-06 |
| 11 | 118575693 | rs638514    | C | T |  | 0.938 | -7977.388 | -7976.876 | 0.512 | 6.45E-06 |
| 11 | 116801201 | rs645258    | A | C |  | 0.909 | -7977.388 | -7976.878 | 0.51  | 6.44E-06 |

|    |           |              |   |   |   |         |             |   |              |
|----|-----------|--------------|---|---|---|---------|-------------|---|--------------|
| 11 | 117373635 | rs686133     | G | T | M | Disease | 0.554779235 | M | Disease&NULL |
| 11 | 118590961 | rs111227443  | T | C | M | Disease | 0.556013891 | M | Disease&NULL |
| 11 | 119904782 | rs373191677  | A | G | M | Disease | 0.554779235 | M | Disease&NULL |
| 11 | 117994614 | rs7940318    | G | A | M | Disease | 0.556013891 | M | Disease&NULL |
| 11 | 121050766 | rs4936591    | G | A | M | Disease | 0.554779235 | M | Disease&NULL |
| 11 | 121051868 | rs4935762    | A | G | M | Disease | 0.554779235 | M | Disease&NULL |
| 11 | 117905204 | rs56310543   | A | G | M | Disease | 0.554779235 | M | Disease&NULL |
| 11 | 120828334 | rs375508071  | G | A | M | Disease | 0.554779235 | M | Disease&NULL |
| 11 | 121018237 | rs7105356    | G | A | M | Disease | 0.554779235 | M | Disease&NULL |
| 11 | 120529153 | rs76635827   | C | G | M | Disease | 0.554779235 | M | Disease&NULL |
| 11 | 116787192 | rs17120152   | C | T | M | Disease | 0.554779235 | M | Disease&NULL |
| 11 | 118263388 | rs2276422    | G | C | M | Disease | 0.553543903 | M | Disease&NULL |
| 11 | 116774475 | rs78832854   | A | T | M | Disease | 0.553543903 | M | Disease&NULL |
| 11 | 120071508 | rs11217762   | A | G | M | Disease | 0.553543903 | M | Disease&NULL |
| 11 | 116732231 | rs80026097   | C | T | M | Disease | 0.554779235 | M | Disease&NULL |
| 11 | 121024461 | rs11826847   | A | G | M | Disease | 0.553543903 | M | Disease&NULL |
| 11 | 117908926 | rs61900561   | A | G | M | Disease | 0.553543903 | M | Disease&NULL |
| 11 | 118265734 | rs79092677   | G | T | M | Disease | 0.553543903 | M | Disease&NULL |
| 11 | 118267763 | rs10892237   | C | T | M | Disease | 0.553543903 | M | Disease&NULL |
| 11 | 120606965 | rs11607895   | T | C | M | Disease | 0.553543903 | M | Disease&NULL |
| 11 | 116735788 | rs6589576    | C | G | M | Disease | 0.553543903 | M | Disease&NULL |
| 11 | 121018507 | rs7108741    | T | C | M | Disease | 0.553543903 | M | Disease&NULL |
| 11 | 116515528 | rs78221557   | A | G | M | Disease | 0.553543903 | M | Disease&NULL |
| 11 | 120899875 | rs113685600  | G | C | M | Disease | 0.553543903 | M | Disease&NULL |
| 11 | 116765476 | rs77349713   | C | T | M | Disease | 0.55230791  | M | Disease&NULL |
| 11 | 121009627 | rs541623     | A | G | M | Disease | 0.55230791  | M | Disease&NULL |
| 11 | 116897073 | rs117158703  | T | C | M | Disease | 0.553543903 | M | Disease&NULL |
| 11 | 121059326 | rs12279811   | T | C | M | Disease | 0.55230791  | M | Disease&NULL |
| 11 | 120008468 | rs1670195    | C | G | M | Disease | 0.553543903 | M | Disease&NULL |
| 11 | 120413132 | rs2266134    | C | G | M | Disease | 0.55230791  | M | Disease&NULL |
| 11 | 117434487 | rs17509913   | A | G | M | Disease | 0.55230791  | M | Disease&NULL |
| 11 | 117377135 | rs694093     | T | G | M | Disease | 0.551071269 | M | Disease&NULL |
| 11 | 118265227 | rs7131196    | C | T | M | Disease | 0.551071269 | M | Disease&NULL |
| 11 | 121010550 | rs607999     | G | A | M | Disease | 0.551071269 | M | Disease&NULL |
| 11 | 121015763 | rs4936582    | C | T | M | Disease | 0.551071269 | M | Disease&NULL |
| 11 | 116922586 | rs111530588  | A | G | M | Disease | 0.55230791  | M | Disease&NULL |
| 11 | 117513154 | rs613244     | A | G | M | Disease | 0.551071269 | M | Disease&NULL |
| 11 | 117406992 | rs7103687    | A | C | M | Disease | 0.551071269 | M | Disease&NULL |
| 11 | 118580348 | rs516503     | T | C | M | Disease | 0.551071269 | M | Disease&NULL |
| 11 | 116880715 | rs79862770   | T | C | M | Disease | 0.551071269 | M | Disease&NULL |
| 11 | 116881126 | rs34998970   | G | A | M | Disease | 0.551071269 | M | Disease&NULL |
| 11 | 116565732 | rs4938299    | A | G | M | Disease | 0.551071269 | M | Disease&NULL |
| 11 | 118725189 | rs112965917  | A | T | M | Disease | 0.551071269 | M | Disease&NULL |
| 11 | 120703916 | rs11218019   | C | A | M | Disease | 0.551071269 | M | Disease&NULL |
| 11 | 118712509 | rs75488969   | T | C | M | Disease | 0.551071269 | M | Disease&NULL |
| 11 | 118598612 | rs568688     | G | T | M | Disease | 0.549833997 | M | Disease&NULL |
| 11 | 117400550 | rs7130708    | A | G | M | Disease | 0.549833997 | M | Disease&NULL |
| 11 | 121010427 | rs513182     | C | T | M | Disease | 0.549833997 | M | Disease&NULL |
| 11 | 117197018 | rs540273     | T | C | M | Disease | 0.549833997 | M | Disease&NULL |
| 11 | 116762028 | rs12285074   | A | G | M | Disease | 0.549833997 | M | Disease&NULL |
| 11 | 119519916 | rs11217373   | G | C | M | Disease | 0.549833997 | M | Disease&NULL |
| 11 | 117302152 | rs57154584   | C | T | M | Disease | 0.549833997 | M | Disease&NULL |
| 11 | 117444090 | rs76948040   | T | C | M | Disease | 0.549833997 | M | Disease&NULL |
| 11 | 121011098 | rs605379     | T | C | M | Disease | 0.549833997 | M | Disease&NULL |
| 11 | 121063130 | rs1943656    | T | C | M | Disease | 0.549833997 | M | Disease&NULL |
| 11 | 116943066 | rs116582417  | A | G | M | Disease | 0.549833997 | M | Disease&NULL |
| 11 | 116897163 | rs76882215   | C | T | M | Disease | 0.549833997 | M | Disease&NULL |
| 11 | 116827369 | rs17120177   | C | T | M | Disease | 0.548596109 | M | Disease&NULL |
| 11 | 117944519 | rs947891     | T | C | M | Disease | 0.548596109 | M | Disease&NULL |
| 11 | 118260017 | rs11216864   | T | C | M | Disease | 0.548596109 | M | Disease&NULL |
| 11 | 118264353 | rs140967993  | G | A | M | Disease | 0.549833997 | M | Disease&NULL |
| 11 | 117431045 | rs623052     | G | A | M | Disease | 0.548596109 | M | Disease&NULL |
| 11 | 121018771 | rs4436552    | T | A | M | Disease | 0.548596109 | M | Disease&NULL |
| 11 | 121018772 | rs4539330    | C | G | M | Disease | 0.548596109 | M | Disease&NULL |
| 11 | 116677048 | rs12802202   | C | T | M | Disease | 0.548596109 | M | Disease&NULL |
| 11 | 117090225 | rs45577233   | T | A | M | Disease | 0.548596109 | M | Disease&NULL |
| 11 | 118267686 | rs79990075   | T | C | M | Disease | 0.548596109 | M | Disease&NULL |
| 11 | 116768491 | rs1474828939 | T | C | M | Disease | 0.548596109 | M | Disease&NULL |
| 11 | 117914450 | rs61900563   | A | G | M | Disease | 0.547357618 | M | Disease&NULL |
| 11 | 116789438 | rs7130160    | C | T | M | Disease | 0.548596109 | M | Disease&NULL |
| 11 | 116792299 | rs1020392    | A | G | M | Disease | 0.548596109 | M | Disease&NULL |
| 11 | 116792336 | rs1020393    | T | C | M | Disease | 0.548596109 | M | Disease&NULL |
| 11 | 118285789 | rs75017819   | G | A | M | Disease | 0.547357618 | M | Disease&NULL |
| 11 | 119728661 | rs145723586  | T | C | M | Disease | 0.547357618 | M | Disease&NULL |
| 11 | 116781699 | rs78234966   | C | T | M | Disease | 0.547357618 | M | Disease&NULL |
| 11 | 117251521 | rs2061293    | G | C | M | Disease | 0.547357618 | M | Disease&NULL |
| 11 | 117252489 | rs897836     | T | C | M | Disease | 0.547357618 | M | Disease&NULL |
| 11 | 120412867 | rs2510877    | G | T | M | Disease | 0.547357618 | M | Disease&NULL |
| 11 | 121053084 | rs4499012    | A | G | M | Disease | 0.547357618 | M | Disease&NULL |
| 11 | 117004891 | rs111519461  | A | T | M | Disease | 0.547357618 | M | Disease&NULL |
| 11 | 118588998 | rs570424     | C | T | M | Disease | 0.547357618 | M | Disease&NULL |
| 11 | 118180887 | rs146525935  | C | T | M | Disease | 0.547357618 | M | Disease&NULL |
| 11 | 116970761 | rs76567973   | G | C | M | Disease | 0.547357618 | M | Disease&NULL |
| 11 | 116833399 | rs7120762    | C | A | M | Disease | 0.547357618 | M | Disease&NULL |
| 11 | 116852927 | rs7127416    | T | C | M | Disease | 0.547357618 | M | Disease&NULL |
| 11 | 117301818 | rs4356265    | T | C | M | Disease | 0.546118541 | M | Disease&NULL |
| 11 | 118137524 | rs12273260   | T | C | M | Disease | 0.547357618 | M | Disease&NULL |
| 11 | 116877159 | rs10790169   | A | C | M | Disease | 0.546118541 | M | Disease&NULL |
| 11 | 117434728 | rs495118     | G | A | M | Disease | 0.546118541 | M | Disease&NULL |
| 11 | 118580906 | rs496058     | G | A | M | Disease | 0.546118541 | M | Disease&NULL |
| 11 | 117195136 | rs556034     | G | C | M | Disease | 0.546118541 | M | Disease&NULL |
| 11 | 118049817 | rs116848264  | A | T | M | Disease | 0.546118541 | M | Disease&NULL |
| 11 | 120520418 | rs7124091    | G | C | M | Disease | 0.546118541 | M | Disease&NULL |
| 11 | 121011416 | rs596882     | C | G | M | Disease | 0.546118541 | M | Disease&NULL |
| 11 | 116233829 | rs478350     | T | C | M | Disease | 0.546118541 | M | Disease&NULL |
| 11 | 119337452 | rs187900569  | C | G | M | Disease | 0.546118541 | M | Disease&NULL |

|    |           |             |   |   |  |  |       |           |           |       |          |
|----|-----------|-------------|---|---|--|--|-------|-----------|-----------|-------|----------|
| 11 | 117373635 | rs686133    | G | T |  |  | 0.937 | -7977.388 | -7976.946 | 0.442 | 6.02E-06 |
| 11 | 118590961 | rs111227443 | T | C |  |  | 0.859 | -7977.388 | -7976.948 | 0.441 | 6.01E-06 |
| 11 | 119904782 | rs373191677 | A | G |  |  | 0.936 | -7977.388 | -7976.948 | 0.441 | 6.01E-06 |
| 11 | 117994614 | rs7940318   | G | A |  |  | 1.122 | -7977.388 | -7976.948 | 0.44  | 6.01E-06 |
| 11 | 121050766 | rs4936591   | G | A |  |  | 0.93  | -7977.388 | -7976.949 | 0.439 | 6.00E-06 |
| 11 | 121051868 | rs4935762   | A | G |  |  | 0.93  | -7977.388 | -7976.949 | 0.439 | 6.00E-06 |
| 11 | 117905204 | rs56310543  | A | G |  |  | 0.936 | -7977.388 | -7976.952 | 0.437 | 5.99E-06 |
| 11 | 120828334 | rs375508071 | G | A |  |  | 0.939 | -7977.388 | -7976.953 | 0.435 | 5.98E-06 |
| 11 | 121018237 | rs7105356   | G | A |  |  | 0.93  | -7977.388 | -7976.955 | 0.434 | 5.97E-06 |
| 11 | 120529153 | rs76635827  | C | G |  |  | 0.869 | -7977.388 | -7976.958 | 0.431 | 5.95E-06 |
| 11 | 116787192 | rs17120152  | C | T |  |  | 1.136 | -7977.388 | -7976.959 | 0.429 | 5.94E-06 |
| 11 | 118263388 | rs2276422   | G | C |  |  | 1.103 | -7977.388 | -7976.959 | 0.429 | 5.94E-06 |
| 11 | 116774475 | rs78832854  | A | T |  |  | 1.115 | -7977.388 | -7976.961 | 0.428 | 5.93E-06 |
| 11 | 120071508 | rs11217762  | A | G |  |  | 1.107 | -7977.388 | -7976.96  | 0.428 | 5.93E-06 |
| 11 | 116732231 | rs80026097  | C | T |  |  | 1.142 | -7977.388 | -7976.961 | 0.427 | 5.93E-06 |
| 11 | 121024461 | rs11826847  | A | G |  |  | 0.93  | -7977.388 | -7976.962 | 0.426 | 5.92E-06 |
| 11 | 117908926 | rs61900561  | A | G |  |  | 0.936 | -7977.388 | -7976.963 | 0.425 | 5.92E-06 |
| 11 | 118265734 | rs79092677  | G | T |  |  | 1.103 | -7977.388 | -7976.964 | 0.424 | 5.91E-06 |
| 11 | 118267763 | rs10892237  | C | T |  |  | 1.103 | -7977.388 | -7976.964 | 0.424 | 5.91E-06 |
| 11 | 120606965 | rs11607895  | T | C |  |  | 0.896 | -7977.388 | -7976.965 | 0.424 | 5.91E-06 |
| 11 | 116735788 | rs6589576   | C | G |  |  | 0.915 | -7977.388 | -7976.966 | 0.423 | 5.90E-06 |
| 11 | 121018507 | rs7108741   | T | C |  |  | 0.93  | -7977.388 | -7976.965 | 0.423 | 5.90E-06 |
| 11 | 116515528 | rs78221557  | A | G |  |  | 1.157 | -7977.388 | -7976.969 | 0.42  | 5.89E-06 |
| 11 | 120899875 | rs113685600 | G | C |  |  | 0.875 | -7977.388 | -7976.969 | 0.42  | 5.89E-06 |
| 11 | 116765476 | rs77349713  | C | T |  |  | 1.114 | -7977.388 | -7976.969 | 0.419 | 5.88E-06 |
| 11 | 121009627 | rs541623    | A | G |  |  | 0.93  | -7977.388 | -7976.97  | 0.419 | 5.88E-06 |
| 11 | 116897073 | rs117158703 | T | C |  |  | 1.158 | -7977.388 | -7976.971 | 0.417 | 5.87E-06 |
| 11 | 121059326 | rs12279811  | T | C |  |  | 0.93  | -7977.388 | -7976.971 | 0.417 | 5.87E-06 |
| 11 | 120008468 | rs1670195   | C | G |  |  | 0.865 | -7977.388 | -7976.972 | 0.416 | 5.86E-06 |
| 11 | 120413132 | rs2266134   | C | G |  |  | 0.934 | -7977.388 | -7976.972 | 0.416 | 5.86E-06 |
| 11 | 117434487 | rs17509913  | A | G |  |  | 1.097 | -7977.388 | -7976.974 | 0.414 | 5.85E-06 |
| 11 | 117377135 | rs69409     |   |   |  |  |       |           |           |       |          |

|    |            |             |   |   |   |         |             |   |              |
|----|------------|-------------|---|---|---|---------|-------------|---|--------------|
| 11 | 116512466  | rs4938293   | T | C | M | Disease | 0.544878892 | M | Disease&NULL |
| 11 | 116780918  | rs6589578   | T | C | M | Disease | 0.546118541 | M | Disease&NULL |
| 11 | 116782582  | rs7106782   | G | A | M | Disease | 0.546118541 | M | Disease&NULL |
| 11 | 116879679  | rs117901629 | A | G | M | Disease | 0.546118541 | M | Disease&NULL |
| 11 | 119885462  | rs630332    | A | G | M | Disease | 0.546118541 | M | Disease&NULL |
| 11 | 117534353  | rs630024    | A | C | M | Disease | 0.544878892 | M | Disease&NULL |
| 11 | 116765925  | rs74881320  | C | A | M | Disease | 0.544878892 | M | Disease&NULL |
| 11 | 116835363  | rs59283948  | A | G | M | Disease | 0.546118541 | M | Disease&NULL |
| 11 | 121018391  | rs7108587   | T | C | M | Disease | 0.544878892 | M | Disease&NULL |
| 11 | 117486730  | rs7942967   | T | C | M | Disease | 0.544878892 | M | Disease&NULL |
| 11 | 120521504  | rs7128690   | T | G | M | Disease | 0.544878892 | M | Disease&NULL |
| 11 | 117913074  | rs4936421   | C | A | M | Disease | 0.544878892 | M | Disease&NULL |
| 11 | 120428134  | rs2248404   | A | G | M | Disease | 0.544878892 | M | Disease&NULL |
| 11 | 121066195  | rs524392    | A | T | M | Disease | 0.543638687 | M | Disease&NULL |
| 11 | 116953644  | rs11216270  | A | C | M | Disease | 0.543638687 | M | Disease&NULL |
| 11 | 117525125  | rs583983    | T | C | M | Disease | 0.543638687 | M | Disease&NULL |
| 11 | 117913315  | rs55730046  | T | C | M | Disease | 0.544386887 | M | Disease&NULL |
| 11 | 120520282  | rs7121104   | T | G | M | Disease | 0.544878892 | M | Disease&NULL |
| 11 | 117395497  | rs55642294  | A | C | M | Disease | 0.543638687 | M | Disease&NULL |
| 11 | 1178748170 | rs77074463  | C | G | M | Disease | 0.543638687 | M | Disease&NULL |
| 11 | 121011342  | rs560365    | T | C | M | Disease | 0.542397941 | M | Disease&NULL |
| 11 | 117268683  | rs34114773  | C | T | M | Disease | 0.542397941 | M | Disease&NULL |
| 11 | 117361165  | rs115325870 | T | C | M | Disease | 0.543638687 | M | Disease&NULL |
| 11 | 118866505  | rs7120982   | A | G | M | Disease | 0.542397941 | M | Disease&NULL |
| 11 | 119941807  | rs10790363  | A | G | M | Disease | 0.542397941 | M | Disease&NULL |
| 11 | 116778813  | rs35184536  | G | A | M | Disease | 0.542397941 | M | Disease&NULL |
| 11 | 116901175  | rs79257193  | G | A | M | Disease | 0.542397941 | M | Disease&NULL |
| 11 | 117399606  | rs7126500   | T | G | M | Disease | 0.541156668 | M | Disease&NULL |
| 11 | 120503083  | rs11217933  | A | G | M | Disease | 0.541156668 | M | Disease&NULL |
| 11 | 116625897  | rs67120644  | C | T | M | Disease | 0.541156668 | M | Disease&NULL |
| 11 | 117790342  | rs11216620  | T | C | M | Disease | 0.542397941 | M | Disease&NULL |
| 11 | 119582832  | rs4409845   | G | A | M | Disease | 0.542397941 | M | Disease&NULL |
| 11 | 120414586  | rs2266100   | A | G | M | Disease | 0.541156668 | M | Disease&NULL |
| 11 | 116883716  | rs7110042   | T | C | M | Disease | 0.542397941 | M | Disease&NULL |
| 11 | 116890488  | rs138975985 | T | C | M | Disease | 0.542397941 | M | Disease&NULL |
| 11 | 116333012  | rs73009128  | T | C | M | Disease | 0.541156668 | M | Disease&NULL |
| 11 | 116937361  | rs79955870  | T | C | M | Disease | 0.541156668 | M | Disease&NULL |
| 11 | 116940210  | rs11216261  | C | T | M | Disease | 0.541156668 | M | Disease&NULL |
| 11 | 117248832  | rs11216370  | A | G | M | Disease | 0.541156668 | M | Disease&NULL |
| 11 | 117430025  | rs75375456  | T | G | M | Disease | 0.541156668 | M | Disease&NULL |
| 11 | 116806616  | rs76384483  | C | T | M | Disease | 0.541156668 | M | Disease&NULL |
| 11 | 118788081  | rs7929825   | G | C | M | Disease | 0.539914885 | M | Disease&NULL |
| 11 | 119593446  | rs11604214  | A | G | M | Disease | 0.541156668 | M | Disease&NULL |
| 11 | 121011325  | rs560401    | G | A | M | Disease | 0.539914885 | M | Disease&NULL |
| 11 | 116955934  | rs2368149   | A | G | M | Disease | 0.539914885 | M | Disease&NULL |
| 11 | 116956990  | rs12281358  | C | T | M | Disease | 0.539914885 | M | Disease&NULL |
| 11 | 117074299  | rs2269397   | C | T | M | Disease | 0.539914885 | M | Disease&NULL |
| 11 | 118006853  | rs113579428 | T | C | M | Disease | 0.541156668 | M | Disease&NULL |
| 11 | 118178757  | rs11601508  | A | G | M | Disease | 0.539914885 | M | Disease&NULL |
| 11 | 116772486  | rs17120131  | C | T | M | Disease | 0.539914885 | M | Disease&NULL |
| 11 | 116773318  | rs17120132  | A | T | M | Disease | 0.539914885 | M | Disease&NULL |
| 11 | 116773761  | rs17120136  | G | T | M | Disease | 0.539914885 | M | Disease&NULL |
| 11 | 116775196  | rs12280030  | A | T | M | Disease | 0.539914885 | M | Disease&NULL |
| 11 | 116811878  | rs114034580 | G | A | M | Disease | 0.539914885 | M | Disease&NULL |
| 11 | 118811878  | rs74891547  | C | G | M | Disease | 0.539914885 | M | Disease&NULL |
| 11 | 120405437  | rs2508653   | T | C | M | Disease | 0.539914885 | M | Disease&NULL |
| 11 | 119881100  | rs2850802   | A | G | M | Disease | 0.539914885 | M | Disease&NULL |
| 11 | 116907715  | rs75216569  | G | A | M | Disease | 0.539914885 | M | Disease&NULL |
| 11 | 116645336  | rs3087611   | T | A | M | Disease | 0.539914885 | M | Disease&NULL |
| 11 | 121007228  | rs4935760   | T | A | M | Disease | 0.538672605 | M | Disease&NULL |
| 11 | 116793693  | rs10892047  | T | C | M | Disease | 0.538672605 | M | Disease&NULL |
| 11 | 120419320  | rs77998262  | A | G | M | Disease | 0.538672605 | M | Disease&NULL |
| 11 | 116505583  | rs1784108   | T | C | M | Disease | 0.538672605 | M | Disease&NULL |
| 11 | 116414846  | rs61904786  | G | C | M | Disease | 0.538672605 | M | Disease&NULL |
| 11 | 116787320  | rs12277181  | A | G | M | Disease | 0.538672605 | M | Disease&NULL |
| 11 | 116911012  | rs12273545  | T | C | M | Disease | 0.538672605 | M | Disease&NULL |
| 11 | 116946853  | rs12274725  | T | C | M | Disease | 0.538672605 | M | Disease&NULL |
| 11 | 116947180  | rs11216265  | C | T | M | Disease | 0.538672605 | M | Disease&NULL |
| 11 | 116951584  | rs10082561  | C | A | M | Disease | 0.538672605 | M | Disease&NULL |
| 11 | 116958533  | rs12277910  | A | C | M | Disease | 0.538672605 | M | Disease&NULL |
| 11 | 117995697  | rs626562    | A | G | M | Disease | 0.538672605 | M | Disease&NULL |
| 11 | 116764436  | rs576262    | C | G | M | Disease | 0.538672605 | M | Disease&NULL |
| 11 | 116774244  | rs78694306  | T | G | M | Disease | 0.538672605 | M | Disease&NULL |
| 11 | 116774499  | rs115971514 | C | G | M | Disease | 0.538672605 | M | Disease&NULL |
| 11 | 117425169  | rs142260742 | T | C | M | Disease | 0.538672605 | M | Disease&NULL |
| 11 | 117426035  | rs80350215  | C | T | M | Disease | 0.538672605 | M | Disease&NULL |
| 11 | 117213159  | rs143793912 | T | C | M | Disease | 0.538672605 | M | Disease&NULL |
| 11 | 119882896  | rs587793    | C | T | M | Disease | 0.538672605 | M | Disease&NULL |
| 11 | 117403727  | rs12421706  | T | C | M | Disease | 0.538672605 | M | Disease&NULL |
| 11 | 120529603  | rs150492485 | A | G | M | Disease | 0.538672605 | M | Disease&NULL |
| 11 | 116919969  | rs75890305  | G | A | M | Disease | 0.537429845 | M | Disease&NULL |
| 11 | 117186073  | rs2445939   | T | A | M | Disease | 0.537429845 | M | Disease&NULL |
| 11 | 117340239  | rs12416923  | A | G | M | Disease | 0.537429845 | M | Disease&NULL |
| 11 | 116909657  | rs143138921 | G | T | M | Disease | 0.537429845 | M | Disease&NULL |
| 11 | 116911423  | rs74603899  | T | G | M | Disease | 0.537429845 | M | Disease&NULL |
| 11 | 116912494  | rs77960525  | A | G | M | Disease | 0.537429845 | M | Disease&NULL |
| 11 | 118763736  | rs12363277  | C | T | M | Disease | 0.537429845 | M | Disease&NULL |
| 11 | 116795948  | rs12292371  | C | G | M | Disease | 0.537429845 | M | Disease&NULL |
| 11 | 116796065  | rs12292434  | A | G | M | Disease | 0.537429845 | M | Disease&NULL |
| 11 | 116797475  | rs12285956  | A | G | M | Disease | 0.537429845 | M | Disease&NULL |
| 11 | 116800270  | rs79157715  | A | G | M | Disease | 0.537429845 | M | Disease&NULL |
| 11 | 116801061  | rs75776964  | G | C | M | Disease | 0.537429845 | M | Disease&NULL |
| 11 | 116802972  | rs74615346  | C | A | M | Disease | 0.537429845 | M | Disease&NULL |
| 11 | 116804005  | rs12270974  | T | C | M | Disease | 0.537429845 | M | Disease&NULL |
| 11 | 116804370  | rs12272491  | T | C | M | Disease | 0.537429845 | M | Disease&NULL |
| 11 | 116804762  | rs12418735  | G | T | M | Disease | 0.537429845 | M | Disease&NULL |

|    |            |             |   |   |  |       |           |           |       |          |
|----|------------|-------------|---|---|--|-------|-----------|-----------|-------|----------|
| 11 | 116512466  | rs4938293   | T | C |  | 1.067 | -7977.388 | -7977.026 | 0.362 | 5.56E-06 |
| 11 | 116780918  | rs6589578   | T | C |  | 1.133 | -7977.388 | -7977.028 | 0.36  | 5.54E-06 |
| 11 | 116782582  | rs7106782   | G | A |  | 1.133 | -7977.388 | -7977.028 | 0.36  | 5.54E-06 |
| 11 | 116879679  | rs117901629 | A | G |  | 1.114 | -7977.388 | -7977.029 | 0.36  | 5.54E-06 |
| 11 | 119885462  | rs630332    | A | G |  | 0.897 | -7977.388 | -7977.028 | 0.36  | 5.54E-06 |
| 11 | 117534353  | rs630024    | A | C |  | 0.939 | -7977.388 | -7977.03  | 0.359 | 5.54E-06 |
| 11 | 116765925  | rs74881320  | C | A |  | 1.112 | -7977.388 | -7977.03  | 0.358 | 5.53E-06 |
| 11 | 116835363  | rs59283948  | A | G |  | 1.133 | -7977.388 | -7977.03  | 0.358 | 5.53E-06 |
| 11 | 121018391  | rs7108587   | T | C |  | 0.931 | -7977.388 | -7977.031 | 0.357 | 5.53E-06 |
| 11 | 117486730  | rs7942967   | T | C |  | 1.07  | -7977.388 | -7977.034 | 0.355 | 5.52E-06 |
| 11 | 120521504  | rs7128690   | T | G |  | 0.874 | -7977.388 | -7977.033 | 0.355 | 5.52E-06 |
| 11 | 117913074  | rs4936421   | C | A |  | 0.937 | -7977.388 | -7977.034 | 0.354 | 5.51E-06 |
| 11 | 120428134  | rs2248404   | A | G |  | 0.894 | -7977.388 | -7977.038 | 0.351 | 5.49E-06 |
| 11 | 121066195  | rs524392    | A | T |  | 0.931 | -7977.388 | -7977.041 | 0.348 | 5.48E-06 |
| 11 | 116953644  | rs11216270  | A | C |  | 1.113 | -7977.388 | -7977.041 | 0.347 | 5.47E-06 |
| 11 | 117525125  | rs583983    | T | C |  | 0.939 | -7977.388 | -7977.041 | 0.347 | 5.47E-06 |
| 11 | 117913315  | rs55730046  | T | C |  | 0.937 | -7977.388 | -7977.041 | 0.347 | 5.47E-06 |
| 11 | 120520282  | rs7121104   | T | G |  | 1.139 | -7977.388 | -7977.042 | 0.346 | 5.47E-06 |
| 11 | 117395497  | rs55642294  | A | C |  | 1.069 | -7977.388 | -7977.043 | 0.345 | 5.46E-06 |
| 11 | 1178748170 | rs77074463  | C | G |  | 1.105 | -7977.388 | -7977.046 | 0.342 | 5.45E-06 |
| 11 | 121011342  | rs560365    | T | C |  | 0.939 | -7977.388 | -7977.048 | 0.34  | 5.43E-06 |
| 11 | 117268683  | rs34114773  | C | T |  | 1.065 | -7977.388 | -7977.05  | 0.338 | 5.42E-06 |
| 11 | 117361165  | rs115325870 | T | C |  | 0.861 | -7977.388 | -7977.052 | 0.337 | 5.42E-06 |
| 11 | 118866505  | rs7120982   | A | G |  | 0.94  | -7977.388 | -7977.051 | 0.337 | 5.42E-06 |
| 11 | 119941807  | rs10790363  | A | G |  | 0.897 | -7977.388 | -7977.054 | 0.335 | 5.41E-06 |
| 11 | 116778813  | rs35184536  | G | A |  | 1.111 | -7977.388 | -7977.056 | 0.333 | 5.40E-06 |
| 11 | 116901175  | rs79257193  | G | A |  | 1.131 | -7977.388 | -7977.057 | 0.331 | 5.39E-06 |
| 11 | 117399606  | rs7126500   | T | G |  | 1.069 | -7977.388 | -7977.058 | 0.33  | 5.38E-06 |
| 11 | 120503083  | rs11217933  | A | G |  | 0.939 | -7977.388 | -7977.058 | 0.33  | 5.38E-06 |
| 11 | 116625897  | rs67120644  | C | T |  | 0.926 | -7977.388 | -7977.059 | 0.329 | 5.38E-06 |
| 11 | 117790342  | rs11216620  | T | C |  | 0.888 | -7977.388 | -7977.059 | 0.329 | 5.38E-06 |
| 11 | 119582832  | rs4409845   | G | A |  | 0.884 | -7977.388 | -7977.059 | 0.329 | 5.38E-06 |
| 11 | 120414586  | rs226       |   |   |  |       |           |           |       |          |

|    |           |              |   |   |   |         |             |   |              |
|----|-----------|--------------|---|---|---|---------|-------------|---|--------------|
| 11 | 116807173 | rs12273769   | G | T | M | Disease | 0.537429845 | M | Disease&NULL |
| 11 | 116807368 | rs12294657   | C | G | M | Disease | 0.537429845 | M | Disease&NULL |
| 11 | 116808453 | rs77136879   | T | C | M | Disease | 0.537429845 | M | Disease&NULL |
| 11 | 116809789 | rs7480278    | G | T | M | Disease | 0.537429845 | M | Disease&NULL |
| 11 | 116810906 | rs80015203   | G | A | M | Disease | 0.537429845 | M | Disease&NULL |
| 11 | 116811487 | rs116597701  | G | C | M | Disease | 0.537429845 | M | Disease&NULL |
| 11 | 116812058 | rs78066444   | C | A | M | Disease | 0.537429845 | M | Disease&NULL |
| 11 | 116812628 | rs17120157   | C | T | M | Disease | 0.537429845 | M | Disease&NULL |
| 11 | 116813438 | rs75410648   | T | C | M | Disease | 0.537429845 | M | Disease&NULL |
| 11 | 116814646 | rs12421902   | G | A | M | Disease | 0.537429845 | M | Disease&NULL |
| 11 | 116815599 | rs11216193   | T | C | M | Disease | 0.537429845 | M | Disease&NULL |
| 11 | 116815738 | rs11216194   | C | G | M | Disease | 0.537429845 | M | Disease&NULL |
| 11 | 116816394 | rs10892050   | A | C | M | Disease | 0.537429845 | M | Disease&NULL |
| 11 | 116816778 | rs11216197   | G | A | M | Disease | 0.537429845 | M | Disease&NULL |
| 11 | 116819264 | rs12293755   | T | A | M | Disease | 0.537429845 | M | Disease&NULL |
| 11 | 116819906 | rs12419047   | A | G | M | Disease | 0.537429845 | M | Disease&NULL |
| 11 | 116820023 | rs12421834   | C | A | M | Disease | 0.537429845 | M | Disease&NULL |
| 11 | 116820690 | rs12419437   | A | G | M | Disease | 0.537429845 | M | Disease&NULL |
| 11 | 116823107 | rs77467134   | C | T | M | Disease | 0.537429845 | M | Disease&NULL |
| 11 | 116823521 | rs76654964   | A | G | M | Disease | 0.537429845 | M | Disease&NULL |
| 11 | 116823617 | rs76146269   | G | A | M | Disease | 0.537429845 | M | Disease&NULL |
| 11 | 116824162 | rs12275355   | G | A | M | Disease | 0.537429845 | M | Disease&NULL |
| 11 | 116824286 | rs12289974   | T | C | M | Disease | 0.537429845 | M | Disease&NULL |
| 11 | 116824620 | rs2289890    | A | G | M | Disease | 0.537429845 | M | Disease&NULL |
| 11 | 116825240 | rs2289892    | A | G | M | Disease | 0.537429845 | M | Disease&NULL |
| 11 | 116826617 | rs12291040   | C | T | M | Disease | 0.537429845 | M | Disease&NULL |
| 11 | 116826643 | rs12270837   | C | A | M | Disease | 0.537429845 | M | Disease&NULL |
| 11 | 116831016 | rs11216199   | T | C | M | Disease | 0.537429845 | M | Disease&NULL |
| 11 | 116832718 | rs1053095947 | A | C | M | Disease | 0.537429845 | M | Disease&NULL |
| 11 | 116846266 | rs74927399   | C | T | M | Disease | 0.537429845 | M | Disease&NULL |
| 11 | 116846343 | rs76949321   | A | G | M | Disease | 0.537429845 | M | Disease&NULL |
| 11 | 116848186 | rs11216209   | C | T | M | Disease | 0.537429845 | M | Disease&NULL |
| 11 | 116850351 | rs11216212   | A | T | M | Disease | 0.537429845 | M | Disease&NULL |
| 11 | 116851367 | rs146178826  | G | A | M | Disease | 0.537429845 | M | Disease&NULL |
| 11 | 116852687 | rs11216215   | A | T | M | Disease | 0.537429845 | M | Disease&NULL |
| 11 | 116853922 | rs10128690   | A | G | M | Disease | 0.537429845 | M | Disease&NULL |
| 11 | 116854021 | rs10128570   | G | A | M | Disease | 0.537429845 | M | Disease&NULL |
| 11 | 116854181 | rs10128571   | G | A | M | Disease | 0.537429845 | M | Disease&NULL |
| 11 | 116856322 | rs12287768   | C | A | M | Disease | 0.537429845 | M | Disease&NULL |
| 11 | 116856698 | rs12274771   | G | C | M | Disease | 0.537429845 | M | Disease&NULL |
| 11 | 116856709 | rs12274773   | T | C | M | Disease | 0.537429845 | M | Disease&NULL |
| 11 | 116856992 | rs75212922   | A | T | M | Disease | 0.537429845 | M | Disease&NULL |
| 11 | 116857652 | rs11216217   | A | G | M | Disease | 0.537429845 | M | Disease&NULL |
| 11 | 116862245 | rs80242245   | G | C | M | Disease | 0.537429845 | M | Disease&NULL |
| 11 | 116862661 | rs11216218   | T | C | M | Disease | 0.537429845 | M | Disease&NULL |
| 11 | 116862755 | rs11216219   | T | C | M | Disease | 0.537429845 | M | Disease&NULL |
| 11 | 116944846 | rs17120293   | C | T | M | Disease | 0.537429845 | M | Disease&NULL |
| 11 | 116971677 | rs78135964   | T | G | M | Disease | 0.537429845 | M | Disease&NULL |
| 11 | 117927550 | rs4938473    | A | G | M | Disease | 0.53618662  | M | Disease&NULL |
| 11 | 116653185 | rs78359532   | C | G | M | Disease | 0.537429845 | M | Disease&NULL |
| 11 | 120414838 | rs2266101    | T | C | M | Disease | 0.53618662  | M | Disease&NULL |
| 11 | 117412884 | rs11823783   | C | T | M | Disease | 0.53618662  | M | Disease&NULL |
| 11 | 117864999 | rs61740780   | A | G | M | Disease | 0.537429845 | M | Disease&NULL |
| 11 | 116777063 | rs12273762   | A | T | M | Disease | 0.53618662  | M | Disease&NULL |
| 11 | 116778065 | rs9651681    | C | T | M | Disease | 0.53618662  | M | Disease&NULL |
| 11 | 116782974 | rs11216185   | G | T | M | Disease | 0.53618662  | M | Disease&NULL |
| 11 | 116872876 | rs77585745   | C | T | M | Disease | 0.537429845 | M | Disease&NULL |
| 11 | 116892368 | rs77955134   | A | G | M | Disease | 0.53618662  | M | Disease&NULL |
| 11 | 116892446 | rs77594377   | A | G | M | Disease | 0.53618662  | M | Disease&NULL |
| 11 | 116896913 | rs2186844    | T | C | M | Disease | 0.53618662  | M | Disease&NULL |
| 11 | 116899580 | rs12289032   | T | C | M | Disease | 0.53618662  | M | Disease&NULL |
| 11 | 116899825 | rs146943088  | C | A | M | Disease | 0.53618662  | M | Disease&NULL |
| 11 | 116988790 | rs80197460   | G | C | M | Disease | 0.53618662  | M | Disease&NULL |
| 11 | 118187395 | rs13377487   | A | T | M | Disease | 0.53618662  | M | Disease&NULL |
| 11 | 116280349 | rs78774571   | T | C | M | Disease | 0.53618662  | M | Disease&NULL |
| 11 | 120404835 | rs55765491   | G | A | M | Disease | 0.53618662  | M | Disease&NULL |
| 11 | 120530241 | rs78641307   | C | A | M | Disease | 0.53618662  | M | Disease&NULL |
| 11 | 116758216 | rs113213242  | T | C | M | Disease | 0.53618662  | M | Disease&NULL |
| 11 | 116758454 | rs17134988   | A | G | M | Disease | 0.53618662  | M | Disease&NULL |
| 11 | 116760474 | rs117457463  | A | G | M | Disease | 0.53618662  | M | Disease&NULL |
| 11 | 116333791 | rs73009129   | A | G | M | Disease | 0.53618662  | M | Disease&NULL |
| 11 | 117417384 | rs80041541   | T | G | M | Disease | 0.53618662  | M | Disease&NULL |
| 11 | 117418077 | rs75809806   | A | G | M | Disease | 0.53618662  | M | Disease&NULL |
| 11 | 117420369 | rs77342459   | G | C | M | Disease | 0.53618662  | M | Disease&NULL |
| 11 | 118978411 | rs7940073    | G | C | M | Disease | 0.534942945 | M | Disease&NULL |
| 11 | 118979026 | rs6589717    | T | C | M | Disease | 0.534942945 | M | Disease&NULL |
| 11 | 116731302 | rs75428021   | T | C | M | Disease | 0.53618662  | M | Disease&NULL |
| 11 | 116908706 | rs80273401   | C | T | M | Disease | 0.534942945 | M | Disease&NULL |
| 11 | 117192376 | rs516712     | G | A | M | Disease | 0.534942945 | M | Disease&NULL |
| 11 | 116791307 | rs78692246   | A | G | M | Disease | 0.534942945 | M | Disease&NULL |
| 11 | 116964065 | rs77366224   | T | G | M | Disease | 0.534942945 | M | Disease&NULL |
| 11 | 116964066 | rs77341747   | T | C | M | Disease | 0.534942945 | M | Disease&NULL |
| 11 | 116972227 | rs148233183  | A | G | M | Disease | 0.534942945 | M | Disease&NULL |
| 11 | 118595207 | rs563537     | A | T | M | Disease | 0.534942945 | M | Disease&NULL |
| 11 | 116821415 | rs73592285   | C | T | M | Disease | 0.534942945 | M | Disease&NULL |
| 11 | 120025452 | rs79959350   | G | A | M | Disease | 0.534942945 | M | Disease&NULL |
| 11 | 120526291 | rs56926846   | A | G | M | Disease | 0.53618662  | M | Disease&NULL |
| 11 | 121016838 | rs17130952   | T | C | M | Disease | 0.534942945 | M | Disease&NULL |
| 11 | 116912117 | rs77999164   | T | C | M | Disease | 0.534942945 | M | Disease&NULL |
| 11 | 116919273 | rs12280172   | A | G | M | Disease | 0.534942945 | M | Disease&NULL |
| 11 | 116924000 | rs11216250   | T | C | M | Disease | 0.534942945 | M | Disease&NULL |
| 11 | 120414850 | rs2510878    | C | A | M | Disease | 0.534942945 | M | Disease&NULL |
| 11 | 116758658 | rs117231130  | C | T | M | Disease | 0.534942945 | M | Disease&NULL |
| 11 | 117653350 | rs7940750    | T | C | M | Disease | 0.534942945 | M | Disease&NULL |
| 11 | 116947306 | rs12418036   | A | G | M | Disease | 0.534942945 | M | Disease&NULL |
| 11 | 117412773 | rs111698696  | T | C | M | Disease | 0.533698835 | M | Disease&NULL |

|    |           |              |   |   |  |       |           |           |       |          |
|----|-----------|--------------|---|---|--|-------|-----------|-----------|-------|----------|
| 11 | 116807173 | rs12273769   | G | T |  | 1.111 | -7977.388 | -7977.095 | 0.294 | 5.19E-06 |
| 11 | 116807368 | rs12294657   | C | G |  | 1.111 | -7977.388 | -7977.095 | 0.294 | 5.19E-06 |
| 11 | 116808453 | rs77136879   | T | C |  | 1.111 | -7977.388 | -7977.095 | 0.294 | 5.19E-06 |
| 11 | 116809789 | rs7480278    | G | T |  | 1.111 | -7977.388 | -7977.095 | 0.294 | 5.19E-06 |
| 11 | 116810906 | rs80015203   | G | A |  | 1.111 | -7977.388 | -7977.095 | 0.294 | 5.19E-06 |
| 11 | 116811487 | rs116597701  | G | C |  | 1.111 | -7977.388 | -7977.095 | 0.294 | 5.19E-06 |
| 11 | 116812058 | rs78066444   | C | A |  | 1.111 | -7977.388 | -7977.095 | 0.294 | 5.19E-06 |
| 11 | 116812628 | rs17120157   | C | T |  | 1.111 | -7977.388 | -7977.095 | 0.294 | 5.19E-06 |
| 11 | 116813438 | rs75410648   | T | C |  | 1.111 | -7977.388 | -7977.095 | 0.294 | 5.19E-06 |
| 11 | 116814646 | rs12421902   | G | A |  | 1.111 | -7977.388 | -7977.095 | 0.294 | 5.19E-06 |
| 11 | 116815599 | rs11216193   | T | C |  | 1.111 | -7977.388 | -7977.095 | 0.294 | 5.19E-06 |
| 11 | 116815738 | rs11216194   | C | G |  | 1.111 | -7977.388 | -7977.095 | 0.294 | 5.19E-06 |
| 11 | 116816394 | rs10892050   | A | C |  | 1.111 | -7977.388 | -7977.095 | 0.294 | 5.19E-06 |
| 11 | 116816778 | rs11216197   | G | A |  | 1.111 | -7977.388 | -7977.095 | 0.294 | 5.19E-06 |
| 11 | 116819264 | rs12293755   | T | A |  | 1.111 | -7977.388 | -7977.095 | 0.294 | 5.19E-06 |
| 11 | 116819906 | rs12419047   | A | G |  | 1.111 | -7977.388 | -7977.095 | 0.294 | 5.19E-06 |
| 11 | 116820023 | rs12421834   | C | A |  | 1.111 | -7977.388 | -7977.095 | 0.294 | 5.19E-06 |
| 11 | 116820690 | rs12419437   | A | G |  | 1.111 | -7977.388 | -7977.095 | 0.294 | 5.19E-06 |
| 11 | 116823107 | rs77467134   | C | T |  | 1.111 | -7977.388 | -7977.095 | 0.294 | 5.19E-06 |
| 11 | 116823521 | rs76654964   | A | G |  | 1.111 | -7977.388 | -7977.095 | 0.294 | 5.19E-06 |
| 11 | 116823617 | rs76146269   | G | A |  | 1.111 | -7977.388 | -7977.095 | 0.294 | 5.19E-06 |
| 11 | 116824162 | rs12275355   | G | A |  | 1.111 | -7977.388 | -7977.095 | 0.294 | 5.19E-06 |
| 11 | 116824286 | rs12289974   | T | C |  | 1.111 | -7977.388 | -7977.095 | 0.294 | 5.19E-06 |
| 11 | 116824620 | rs2289890    | A | G |  | 1.111 | -7977.388 | -7977.095 | 0.294 | 5.19E-06 |
| 11 | 116825240 | rs2289892    | A | G |  | 1.111 | -7977.388 | -7977.095 | 0.294 | 5.19E-06 |
| 11 | 116826617 | rs12291040   | C | T |  | 1.111 | -7977.388 | -7977.095 | 0.294 | 5.19E-06 |
| 11 | 116826643 | rs12270837   | C | A |  | 1.111 | -7977.388 | -7977.095 | 0.294 | 5.19E-06 |
| 11 | 116831016 | rs11216199   | T | C |  | 1.111 | -7977.388 | -7977.095 | 0.294 | 5.19E-06 |
| 11 | 116832718 | rs1053095947 | A | C |  | 1.111 | -7977.388 | -7977.095 | 0.294 | 5.19E-06 |
| 11 | 116846266 | rs74927399   | C | T |  | 1.111 | -7977.388 | -7977.095 | 0.294 | 5.19E-06 |
| 11 | 116846343 | rs76949321   | A | G |  | 1.111 | -7977.388 | -7977.095 | 0.294 | 5.19E-06 |
| 11 | 116848186 | rs11216209   | C | T |  | 1.111 | -7977.388 | -7977.095 | 0.294 | 5.19E-06 |

|    |            |             |   |   |   |         |             |   |              |
|----|------------|-------------|---|---|---|---------|-------------|---|--------------|
| 11 | 116767722  | rs141555847 | A | G | M | Disease | 0.534942945 | M | Disease&NULL |
| 11 | 116771204  | rs76402668  | C | T | M | Disease | 0.534942945 | M | Disease&NULL |
| 11 | 116778138  | rs146523230 | A | G | M | Disease | 0.534942945 | M | Disease&NULL |
| 11 | 116783142  | rs74700879  | A | G | C | Disease | 0.534942945 | M | Disease&NULL |
| 11 | 116874358  | rs12278943  | C | T | M | Disease | 0.533698835 | M | Disease&NULL |
| 11 | 116879723  | rs138181556 | A | G | M | Disease | 0.533698835 | M | Disease&NULL |
| 11 | 118186312  | rs2231450   | A | C | M | Disease | 0.533698835 | M | Disease&NULL |
| 11 | 116285538  | rs563990    | G | A | M | Disease | 0.533698835 | M | Disease&NULL |
| 11 | 120441720  | rs12279396  | G | A | M | Disease | 0.533698835 | M | Disease&NULL |
| 11 | 116801299  | rs77203966  | T | C | M | Disease | 0.533698835 | M | Disease&NULL |
| 11 | 116806367  | rs74557653  | T | G | M | Disease | 0.533698835 | M | Disease&NULL |
| 11 | 116815306  | rs57040912  | G | A | M | Disease | 0.533698835 | M | Disease&NULL |
| 11 | 116815717  | rs12283494  | A | G | M | Disease | 0.533698835 | M | Disease&NULL |
| 11 | 116819050  | rs115255270 | C | T | M | Disease | 0.533698835 | M | Disease&NULL |
| 11 | 116820673  | rs7940300   | T | A | M | Disease | 0.533698835 | M | Disease&NULL |
| 11 | 116824938  | rs2289891   | C | A | M | Disease | 0.533698835 | M | Disease&NULL |
| 11 | 116826409  | rs77161357  | C | T | M | Disease | 0.533698835 | M | Disease&NULL |
| 11 | 116828573  | rs7130221   | A | G | M | Disease | 0.533698835 | M | Disease&NULL |
| 11 | 116828859  | rs6589581   | T | A | M | Disease | 0.533698835 | M | Disease&NULL |
| 11 | 116829129  | rs7938466   | C | T | M | Disease | 0.533698835 | M | Disease&NULL |
| 11 | 116830628  | rs77029349  | T | G | M | Disease | 0.533698835 | M | Disease&NULL |
| 11 | 116839094  | rs117791268 | A | G | M | Disease | 0.533698835 | M | Disease&NULL |
| 11 | 116842174  | rs76223783  | C | T | M | Disease | 0.533698835 | M | Disease&NULL |
| 11 | 116842758  | rs118137922 | A | G | M | Disease | 0.533698835 | M | Disease&NULL |
| 11 | 116844649  | rs7937585   | A | G | M | Disease | 0.533698835 | M | Disease&NULL |
| 11 | 116849038  | rs79868224  | A | G | M | Disease | 0.533698835 | M | Disease&NULL |
| 11 | 116849544  | rs78241753  | C | G | M | Disease | 0.533698835 | M | Disease&NULL |
| 11 | 116850485  | rs7940002   | A | C | M | Disease | 0.533698835 | M | Disease&NULL |
| 11 | 116852714  | rs7112772   | C | T | M | Disease | 0.533698835 | M | Disease&NULL |
| 11 | 116852716  | rs7112773   | C | T | M | Disease | 0.533698835 | M | Disease&NULL |
| 11 | 116856152  | rs7110113   | C | A | M | Disease | 0.533698835 | M | Disease&NULL |
| 11 | 116973247  | rs76942203  | A | G | M | Disease | 0.533698835 | M | Disease&NULL |
| 11 | 116975136  | rs149576335 | A | G | M | Disease | 0.533698835 | M | Disease&NULL |
| 11 | 116752045  | rs78013608  | A | G | M | Disease | 0.533698835 | M | Disease&NULL |
| 11 | 120589179  | rs2852227   | C | A | M | Disease | 0.532454306 | M | Disease&NULL |
| 11 | 116784692  | rs11216186  | C | T | M | Disease | 0.532454306 | M | Disease&NULL |
| 11 | 116785341  | rs79711490  | T | C | M | Disease | 0.532454306 | M | Disease&NULL |
| 11 | 116787633  | rs12418208  | T | C | M | Disease | 0.532454306 | M | Disease&NULL |
| 11 | 116787641  | rs12418209  | T | C | M | Disease | 0.532454306 | M | Disease&NULL |
| 11 | 116788133  | rs1006176   | C | T | M | Disease | 0.532454306 | M | Disease&NULL |
| 11 | 118235246  | rs11216857  | A | G | M | Disease | 0.533698835 | M | Disease&NULL |
| 11 | 119939156  | rs597253    | A | G | M | Disease | 0.532454306 | M | Disease&NULL |
| 11 | 119939806  | rs593319    | T | A | M | Disease | 0.532454306 | M | Disease&NULL |
| 11 | 118974878  | rs4938628   | T | A | M | Disease | 0.532454306 | M | Disease&NULL |
| 11 | 118975113  | rs10736496  | A | G | M | Disease | 0.532454306 | M | Disease&NULL |
| 11 | 118975426  | rs4938629   | C | T | M | Disease | 0.532454306 | M | Disease&NULL |
| 11 | 118975927  | rs10790283  | A | G | M | Disease | 0.532454306 | M | Disease&NULL |
| 11 | 116357627  | rs80310120  | T | C | M | Disease | 0.532454306 | M | Disease&NULL |
| 11 | 118241995  | rs502514    | C | T | M | Disease | 0.532454306 | M | Disease&NULL |
| 11 | 120931054  | rs12795310  | C | T | M | Disease | 0.532454306 | M | Disease&NULL |
| 11 | 116780567  | rs75188049  | A | G | M | Disease | 0.532454306 | M | Disease&NULL |
| 11 | 116780702  | rs77693143  | G | A | M | Disease | 0.532454306 | M | Disease&NULL |
| 11 | 118146884  | rs10892232  | T | A | M | Disease | 0.532454306 | M | Disease&NULL |
| 11 | 117411410  | rs11216444  | G | A | M | Disease | 0.531209373 | M | Disease&NULL |
| 11 | 119881745  | rs651202    | A | G | M | Disease | 0.532454306 | M | Disease&NULL |
| 11 | 116414485  | rs77110391  | A | G | M | Disease | 0.531209373 | M | Disease&NULL |
| 11 | 116805064  | rs77204473  | G | T | M | Disease | 0.532454306 | M | Disease&NULL |
| 11 | 117355892  | rs10892126  | C | G | M | Disease | 0.531209373 | M | Disease&NULL |
| 11 | 117371563  | rs7942406   | T | G | M | Disease | 0.531209373 | M | Disease&NULL |
| 11 | 116905209  | rs80176870  | C | T | M | Disease | 0.532454306 | M | Disease&NULL |
| 11 | 116906984  | rs78550859  | T | C | M | Disease | 0.532454306 | M | Disease&NULL |
| 11 | 116908807  | rs79842631  | G | A | M | Disease | 0.532454306 | M | Disease&NULL |
| 11 | 116908913  | rs77939786  | T | C | M | Disease | 0.532454306 | M | Disease&NULL |
| 11 | 116908914  | rs77393043  | A | C | M | Disease | 0.532454306 | M | Disease&NULL |
| 11 | 118221655  | rs137996620 | C | A | M | Disease | 0.531209373 | M | Disease&NULL |
| 11 | 121006387  | rs4936579   | C | T | M | Disease | 0.531209373 | M | Disease&NULL |
| 11 | 121006650  | rs4427574   | A | G | M | Disease | 0.531209373 | M | Disease&NULL |
| 11 | 117254122  | rs12797557  | A | G | M | Disease | 0.531209373 | M | Disease&NULL |
| 11 | 116547924  | rs55928509  | A | C | M | Disease | 0.531209373 | M | Disease&NULL |
| 11 | 119728423  | rs140657166 | C | A | M | Disease | 0.531209373 | M | Disease&NULL |
| 11 | 116903095  | rs7938234   | T | C | M | Disease | 0.531209373 | M | Disease&NULL |
| 11 | 117411717  | rs59099254  | A | C | M | Disease | 0.531209373 | M | Disease&NULL |
| 11 | 1121066946 | rs1939934   | T | C | M | Disease | 0.531209373 | M | Disease&NULL |
| 11 | 116288186  | rs563229    | G | C | M | Disease | 0.529964052 | M | Disease&NULL |
| 11 | 1121011488 | rs559301    | A | G | M | Disease | 0.529964052 | M | Disease&NULL |
| 11 | 118257081  | rs11216863  | A | G | M | Disease | 0.529964052 | M | Disease&NULL |
| 11 | 116911590  | rs77322791  | G | A | M | Disease | 0.529964052 | M | Disease&NULL |
| 11 | 116941540  | rs9971421   | T | C | M | Disease | 0.529964052 | M | Disease&NULL |
| 11 | 120801185  | rs2186620   | C | T | M | Disease | 0.529964052 | M | Disease&NULL |
| 11 | 116280965  | rs536484    | C | G | M | Disease | 0.529964052 | M | Disease&NULL |
| 11 | 116358711  | rs17119760  | A | C | M | Disease | 0.529964052 | M | Disease&NULL |
| 11 | 117440076  | rs112118203 | C | T | M | Disease | 0.529964052 | M | Disease&NULL |
| 11 | 116731205  | rs4938315   | G | A | M | Disease | 0.529964052 | M | Disease&NULL |
| 11 | 117795717  | rs76014645  | A | C | M | Disease | 0.529964052 | M | Disease&NULL |
| 11 | 117410174  | rs60851263  | T | C | M | Disease | 0.528718357 | M | Disease&NULL |
| 11 | 119938788  | rs645233    | G | A | M | Disease | 0.528718357 | M | Disease&NULL |
| 11 | 116891077  | rs77256870  | G | C | M | Disease | 0.528718357 | M | Disease&NULL |
| 11 | 116927101  | rs7942637   | A | G | M | Disease | 0.528718357 | M | Disease&NULL |
| 11 | 116928199  | rs7125464   | A | G | M | Disease | 0.528718357 | M | Disease&NULL |
| 11 | 116928748  | rs7114746   | G | T | M | Disease | 0.528718357 | M | Disease&NULL |
| 11 | 118974869  | rs4938627   | A | G | M | Disease | 0.528718357 | M | Disease&NULL |
| 11 | 118060549  | rs11216806  | C | T | M | Disease | 0.528718357 | M | Disease&NULL |
| 11 | 117052107  | rs144646355 | A | G | M | Disease | 0.528718357 | M | Disease&NULL |
| 11 | 117052532  | rs61729990  | A | C | M | Disease | 0.528718357 | M | Disease&NULL |
| 11 | 117318533  | rs12417961  | T | C | M | Disease | 0.528718357 | M | Disease&NULL |
| 11 | 119467150  | rs111549567 | C | T | M | Disease | 0.527472304 | M | Disease&NULL |

|    |           |             |   |   |  |       |           |           |       |          |
|----|-----------|-------------|---|---|--|-------|-----------|-----------|-------|----------|
| 11 | 116767722 | rs141555847 | A | G |  | 1.128 | -7977.388 | -7977.118 | 0.27  | 5.07E-06 |
| 11 | 116771204 | rs76402668  | C | T |  | 1.128 | -7977.388 | -7977.118 | 0.27  | 5.07E-06 |
| 11 | 116778138 | rs146523230 | A | G |  | 1.128 | -7977.388 | -7977.118 | 0.27  | 5.07E-06 |
| 11 | 116783142 | rs74700879  | A | G |  | 1.128 | -7977.388 | -7977.112 | 0.268 | 5.06E-06 |
| 11 | 116874358 | rs12278943  | C | T |  | 1.11  | -7977.388 | -7977.122 | 0.266 | 5.05E-06 |
| 11 | 116879723 | rs138181556 | A | G |  | 1.11  | -7977.388 | -7977.122 | 0.266 | 5.05E-06 |
| 11 | 118186312 | rs2231450   | A | C |  | 0.886 | -7977.388 | -7977.122 | 0.266 | 5.05E-06 |
| 11 | 116285538 | rs563990    | G | A |  | 0.922 | -7977.388 | -7977.123 | 0.265 | 5.04E-06 |
| 11 | 120441720 | rs12279396  | G | A |  | 1.063 | -7977.388 | -7977.123 | 0.265 | 5.04E-06 |
| 11 | 116801299 | rs77203966  | T | C |  | 1.128 | -7977.388 | -7977.125 | 0.263 | 5.03E-06 |
| 11 | 116806367 | rs74557653  | T | G |  | 1.128 | -7977.388 | -7977.125 | 0.263 | 5.03E-06 |
| 11 | 116815306 | rs57040912  | G | A |  | 1.128 | -7977.388 | -7977.125 | 0.263 | 5.03E-06 |
| 11 | 116815717 | rs12283494  | A | G |  | 1.128 | -7977.388 | -7977.125 | 0.263 | 5.03E-06 |
| 11 | 116819050 | rs115255270 | C | T |  | 1.128 | -7977.388 | -7977.125 | 0.263 | 5.03E-06 |
| 11 | 116820673 | rs7940300   | T | A |  | 1.128 | -7977.388 | -7977.125 | 0.263 | 5.03E-06 |
| 11 | 116824938 | rs2289891   | C | A |  | 1.128 | -7977.388 | -7977.125 | 0.263 | 5.03E-06 |
| 11 | 116826409 | rs77161357  | C | T |  | 1.128 | -7977.388 | -7977.125 | 0.263 | 5.03E-06 |
| 11 | 116828573 | rs7130221   | A | G |  | 1.128 | -7977.388 | -7977.125 | 0.263 | 5.03E-06 |
| 11 | 116828859 | rs6589581   | T | A |  | 1.128 | -7977.388 | -7977.125 | 0.263 | 5.03E-06 |
| 11 | 116829129 | rs7938466   | C | T |  | 1.128 | -7977.388 | -7977.125 | 0.263 | 5.03E-06 |
| 11 | 116830628 | rs77029349  | T | G |  | 1.128 | -7977.388 | -7977.125 | 0.263 | 5.03E-06 |
| 11 | 116839094 | rs117791268 | A | G |  | 1.128 | -7977.388 | -7977.125 | 0.263 | 5.03E-06 |
| 11 | 116842174 | rs76223783  | C | T |  | 1.128 | -7977.388 | -7977.125 | 0.263 | 5.03E-06 |
| 11 | 116842758 | rs118137922 | A | G |  | 1.128 | -7977.388 | -7977.125 | 0.263 | 5.03E-06 |
| 11 | 116844649 | rs7937585   | A | G |  | 1.128 | -7977.388 | -7977.125 | 0.263 | 5.03E-06 |
| 11 | 116849038 | rs79868224  | A | G |  | 1.128 | -7977.388 | -7977.125 | 0.263 | 5.03E-06 |
| 11 | 116849544 | rs78241753  | C | G |  | 1.128 | -7977.388 | -7977.125 | 0.263 | 5.03E-06 |
| 11 | 116850485 | rs7940002   | A | C |  | 1.128 | -7977.388 | -7977.125 | 0.263 | 5.03E-06 |
| 11 | 116852714 | rs7112772   | C | T |  | 1.128 | -7977.388 | -7977.125 | 0.263 | 5.03E-06 |
| 11 | 116852716 | rs7112773   | C | T |  | 1.128 | -7977.388 | -7977.125 | 0.263 | 5.03E-06 |
| 11 | 116856152 | rs7110113   | C | A |  | 1.128 | -7977.388 | -7977.125 | 0.263 | 5.03E-06 |
| 11 | 116973247 | rs76942203  | A | G |  | 1.11  | -7977.388 | -7977.126 | 0.262 | 5.03E-06 |
| 11 |           |             |   |   |  |       |           |           |       |          |

|    |           |             |   |   |   |         |             |                |                |
|----|-----------|-------------|---|---|---|---------|-------------|----------------|----------------|
| 11 | 116621623 | r54496689   | A | G | M | Disease | 0.528718357 | M_Disease&NULL |                |
| 11 | 117455201 | r37855139   | G | A | M | Disease | 0.528718357 | M_Disease&NULL |                |
| 11 | 117189216 | r53017608   | A | G | M | Disease | 0.527472304 | M_Disease&NULL |                |
| 11 | 116457294 | r55787848   | T | C | M | Disease | 0.527472304 | M_Disease&NULL |                |
| 11 | 116962661 | r116861530  | A | G | M | Disease | 0.527472304 | M_Disease&NULL |                |
| 11 | 120528115 | r57549368   | T | C | M | Disease | 0.527472304 | M_Disease&NULL |                |
| 11 | 116771356 | r595137     | C | T | M | Disease | 0.527472304 | M_Disease&NULL |                |
| 11 | 117412185 | r57208438   | A | G | M | Disease | 0.527472304 | M_Disease&NULL |                |
| 11 | 117459687 | r57173880   | T | C | M | Disease | 0.527472304 | M_Disease&NULL |                |
| 11 | 117411664 | r58088485   | A | G | M | Disease | 0.526225909 | M_Disease&NULL |                |
| 11 | 116828939 | r8786692    | A | C | M | Disease | 0.527472304 | M_Disease&NULL |                |
| 11 | 116829422 | r12420857   | T | G | M | Disease | 0.527472304 | M_Disease&NULL |                |
| 11 | 116838130 | r12281729   | C | A | M | Disease | 0.527472304 | M_Disease&NULL |                |
| 11 | 116839293 | r12417152   | C | G | M | Disease | 0.527472304 | M_Disease&NULL |                |
| 11 | 116839614 | r11216104   | A | G | M | Disease | 0.527472304 | M_Disease&NULL |                |
| 11 | 116839938 | r12272335   | A | G | M | Disease | 0.527472304 | M_Disease&NULL |                |
| 11 | 120502086 | r9277736    | C | T | M | Disease | 0.526225909 | M_Disease&NULL |                |
| 11 | 116928540 | r10892068   | T | C | M | Disease | 0.526225909 | M_Disease&NULL |                |
| 11 | 117349401 | r56057635   | G | A | M | Disease | 0.526225909 | M_Disease&NULL |                |
| 11 | 116674818 | r1279408    | G | A | M | Disease | 0.526225909 | M_Disease&NULL |                |
| 11 | 116842676 | r12418324   | T | C | M | Disease | 0.526225909 | M_Disease&NULL |                |
| 11 | 116863458 | r10128682   | T | C | M | Disease | 0.526225909 | M_Disease&NULL |                |
| 11 | 116976778 | r4388921    | C | T | M | Disease | 0.526225909 | M_Disease&NULL |                |
| 11 | 116727850 | r1035237    | G | C | M | Disease | 0.526225909 | M_Disease&NULL |                |
| 11 | 116516736 | r1002037    | C | G | M | Disease | 0.524979187 | M_Disease&NULL |                |
| 11 | 116530298 | r530849     | C | T | M | Disease | 0.524979187 | M_Disease&NULL |                |
| 11 | 116902372 | r481286     | T | G | M | Disease | 0.524979187 | M_Disease&NULL |                |
| 11 | 117410682 | r5210583    | A | G | M | Disease | 0.524979187 | M_Disease&NULL |                |
| 11 | 116756690 | r54050326   | G | A | M | Disease | 0.526225909 | M_Disease&NULL |                |
| 11 | 117793169 | r57336872   | T | C | M | Disease | 0.524979187 | M_Disease&NULL |                |
| 11 | 117572395 | r55945170   | G | A | M | Disease | 0.524979187 | M_Disease&NULL |                |
| 11 | 116732512 | r2075292    | G | T | M | Disease | 0.524979187 | M_Disease&NULL |                |
| 11 | 11685100  | r57486259   | A | T | M | Disease | 0.524979187 | M_Disease&NULL |                |
| 11 | 116865207 | r4562614    | C | T | M | Disease | 0.524979187 | M_Disease&NULL |                |
| 11 | 116865367 | r79349369   | G | A | M | Disease | 0.524979187 | M_Disease&NULL |                |
| 11 | 116867514 | r10404966   | T | C | M | Disease | 0.524979187 | M_Disease&NULL |                |
| 11 | 116976009 | r142395187  | G | A | M | Disease | 0.524979187 | M_Disease&NULL |                |
| 11 | 116704505 | r12572103   | T | C | M | Disease | 0.524979187 | M_Disease&NULL |                |
| 11 | 117599488 | r138897098  | C | T | M | Disease | 0.524979187 | M_Disease&NULL |                |
| 11 | 117604604 | r17588728   | T | C | M | Disease | 0.524979187 | M_Disease&NULL |                |
| 11 | 117434629 | r94938408   | A | C | M | Disease | 0.524979187 | M_Disease&NULL |                |
| 11 | 120967158 | r63373383   | A | G | M | Disease | 0.524979187 | M_Disease&NULL |                |
| 11 | 116913908 | r186593252  | C | A | M | Disease | 0.524979187 | M_Disease&NULL |                |
| 11 | 116916723 | r60101932   | A | G | M | Disease | 0.524979187 | M_Disease&NULL |                |
| 11 | 116916984 | r74429128   | A | G | M | Disease | 0.524979187 | M_Disease&NULL |                |
| 11 | 118045846 | r76448372   | A | G | M | Disease | 0.523732154 | M_Disease&NULL |                |
| 11 | 116913570 | r1452660348 | A | C | M | Disease | 0.523732154 | M_Disease&NULL |                |
| 11 | 116927762 | r10892607   | C | G | M | Disease | 0.523732154 | M_Disease&NULL |                |
| 11 | 11677955  | r7926623    | A | G | M | Disease | 0.523732154 | M_Disease&NULL |                |
| 11 | 119705743 | r80350987   | A | C | M | Disease | 0.523732154 | M_Disease&NULL |                |
| 11 | 116202083 | r7948971    | G | A | M | Disease | 0.523732154 | M_Disease&NULL |                |
| 11 | 116963277 | r74420345   | A | C | M | Disease | 0.523732154 | M_Disease&NULL |                |
| 11 | 116313516 | r12155936   | A | G | M | Disease | 0.523732154 | M_Disease&NULL |                |
| 11 | 117926624 | r61900565   | G | C | M | Disease | 0.522484825 | M_Disease&NULL |                |
| 11 | 120588487 | r2846108    | T | C | M | Disease | 0.522484825 | M_Disease&NULL |                |
| 11 | 116870411 | r10892056   | C | G | M | Disease | 0.522484825 | M_Disease&NULL |                |
| 11 | 116878066 | r12116226   | G | C | M | Disease | 0.522484825 | M_Disease&NULL |                |
| 11 | 116878759 | r12276805   | C | T | M | Disease | 0.522484825 | M_Disease&NULL |                |
| 11 | 116922585 | r143856824  | A | C | M | Disease | 0.523732154 | M_Disease&NULL |                |
| 11 | 116924439 | r11857960   | C | T | M | Disease | 0.523732154 | M_Disease&NULL |                |
| 11 | 116925898 | r78111243   | C | T | M | Disease | 0.523732154 | M_Disease&NULL |                |
| 11 | 116927976 | r11743293   | A | G | M | Disease | 0.523732154 | M_Disease&NULL |                |
| 11 | 116928302 | r5582303    | C | T | M | Disease | 0.523732154 | M_Disease&NULL |                |
| 11 | 117450936 | r79517065   | T | C | M | Disease | 0.523732154 | M_Disease&NULL |                |
| 11 | 116757720 | r59491594   | S | C | T | M       | Disease     | 0.522484825    | M_Disease&NULL |
| 11 | 116763124 | r74071187   | C | T | M | Disease | 0.522484825 | M_Disease&NULL |                |
| 11 | 116766149 | r7718307    | A | G | M | Disease | 0.522484825 | M_Disease&NULL |                |
| 11 | 117509536 | r692840     | A | G | M | Disease | 0.522484825 | M_Disease&NULL |                |
| 11 | 116718554 | r149318234  | G | C | M | Disease | 0.522484825 | M_Disease&NULL |                |
| 11 | 116805441 | r79207844   | A | G | M | Disease | 0.522484825 | M_Disease&NULL |                |
| 11 | 116805696 | r12274590   | A | G | M | Disease | 0.522484825 | M_Disease&NULL |                |
| 11 | 120324517 | r1603553    | G | C | M | Disease | 0.522484825 | M_Disease&NULL |                |
| 11 | 116762157 | r72645459   | A | C | M | Disease | 0.522484825 | M_Disease&NULL |                |
| 11 | 116530376 | r553779     | G | A | M | Disease | 0.521237215 | M_Disease&NULL |                |
| 11 | 116868721 | r79870586   | A | G | M | Disease | 0.522484825 | M_Disease&NULL |                |
| 11 | 116890667 | r80054734   | G | A | M | Disease | 0.522484825 | M_Disease&NULL |                |
| 11 | 116787327 | r12277092   | T | C | M | Disease | 0.522484825 | M_Disease&NULL |                |
| 11 | 117430841 | r5679848    | A | G | M | Disease | 0.521237215 | M_Disease&NULL |                |
| 11 | 116960059 | r169496015  | G | C | M | Disease | 0.522484825 | M_Disease&NULL |                |
| 11 | 116920984 | r112422338  | A | G | M | Disease | 0.522484825 | M_Disease&NULL |                |
| 11 | 117524455 | r684669     | A | C | M | Disease | 0.521237215 | M_Disease&NULL |                |
| 11 | 118970875 | r10892330   | T | C | M | Disease | 0.521237215 | M_Disease&NULL |                |
| 11 | 117446003 | r74526104   | G | A | M | Disease | 0.521237215 | M_Disease&NULL |                |
| 11 | 120585097 | r61901398   | A | G | M | Disease | 0.521237215 | M_Disease&NULL |                |
| 11 | 117296922 | r6399377    | G | T | M | Disease | 0.521237215 | M_Disease&NULL |                |
| 11 | 116858320 | r76831131   | C | T | M | Disease | 0.521237215 | M_Disease&NULL |                |
| 11 | 116859076 | r143491990  | T | C | M | Disease | 0.521237215 | M_Disease&NULL |                |
| 11 | 116861398 | r1228001593 | A | G | M | Disease | 0.521237215 | M_Disease&NULL |                |
| 11 | 116862105 | r12214284   | C | G | M | Disease | 0.521237215 | M_Disease&NULL |                |
| 11 | 116862779 | r7947525    | T | C | M | Disease | 0.521237215 | M_Disease&NULL |                |
| 11 | 116870159 | r59425942   | T | C | M | Disease | 0.521237215 | M_Disease&NULL |                |
| 11 | 116936871 | r56751865   | T | C | M | Disease | 0.521237215 | M_Disease&NULL |                |
| 11 | 117222256 | r7926760    | C | T | M | Disease | 0.51998934  | M_Disease&NULL |                |
| 11 | 116349950 | r43095499   | A | G | M | Disease | 0.51998934  | M_Disease&NULL |                |
| 11 | 116454374 | r12290205   | G | A | M | Disease | 0.51998934  | M_Disease&NULL |                |
| 11 | 116731852 | r17808637   | G | C | M | Disease | 0.521237215 | M_Disease&NULL |                |

|    |           |             |   |   |  |       |           |           |       |          |
|----|-----------|-------------|---|---|--|-------|-----------|-----------|-------|----------|
| 11 | 116621623 | rs74496689  | A | G |  | 1.143 | -7977.388 | -7977.171 | 0.218 | 4.81E-06 |
| 11 | 117455203 | rs77855139  | G | A |  | 0.876 | -7977.388 | -7977.171 | 0.218 | 4.81E-06 |
| 11 | 117189216 | rs3017608   | A | G |  | 0.942 | -7977.388 | -7977.172 | 0.216 | 4.80E-06 |
| 11 | 116457294 | rs55787848  | T | C |  | 1.078 | -7977.388 | -7977.174 | 0.214 | 4.79E-06 |
| 11 | 116962661 | rs116861530 | A | G |  | 1.108 | -7977.388 | -7977.175 | 0.214 | 4.79E-06 |
| 11 | 120528115 | rs75749368  | T | C |  | 1.131 | -7977.388 | -7977.175 | 0.214 | 4.79E-06 |
| 11 | 116771356 | rs595137    | C | T |  | 0.885 | -7977.388 | -7977.175 | 0.213 | 4.79E-06 |
| 11 | 117412185 | rs57208438  | A | G |  | 1.068 | -7977.388 | -7977.175 | 0.213 | 4.79E-06 |
| 11 | 117459687 | rs71738800  | T | C |  | 1.094 | -7977.388 | -7977.175 | 0.213 | 4.79E-06 |
| 11 | 117411564 | rs58084845  | A | G |  | 1.068 | -7977.388 | -7977.177 | 0.212 | 4.78E-06 |
| 11 | 116828939 | rs878692    | A | C |  | 1.108 | -7977.388 | -7977.177 | 0.211 | 4.78E-06 |
| 11 | 116829442 | rs12420857  | T | G |  | 1.108 | -7977.388 | -7977.177 | 0.211 | 4.78E-06 |
| 11 | 116838130 | rs12281729  | C | A |  | 1.108 | -7977.388 | -7977.177 | 0.211 | 4.78E-06 |
| 11 | 116839293 | rs12417152  | C | G |  | 1.108 | -7977.388 | -7977.177 | 0.211 | 4.78E-06 |
| 11 | 116839614 | rs11216204  | A | G |  | 1.108 | -7977.388 | -7977.177 | 0.211 | 4.78E-06 |
| 11 | 116839938 | rs12272305  | A | G |  | 1.108 | -7977.388 | -7977.177 | 0.211 | 4.78E-06 |
| 11 | 120502086 | rs7927336   | C | T |  | 0.941 | -7977.388 | -7977.178 | 0.211 | 4.77E-06 |
| 11 | 116928546 | rs10892068  | T | C |  | 1.107 | -7977.388 | -7977.179 | 0.209 | 4.77E-06 |
| 11 | 117349401 | rs60567635  | G | A |  | 1.086 | -7977.388 | -7977.182 | 0.206 | 4.75E-06 |
| 11 | 116674818 | rs12749048  | G | A |  | 1.064 | -7977.388 | -7977.183 | 0.205 | 4.75E-06 |
| 11 | 116842676 | rs12418324  | T | C |  | 1.107 | -7977.388 | -7977.183 | 0.205 | 4.75E-06 |
| 11 | 116863458 | rs10128622  | T | C |  | 1.107 | -7977.388 | -7977.183 | 0.205 | 4.75E-06 |
| 11 | 116976778 | rs14388921  | C | T |  | 1.071 | -7977.388 | -7977.184 | 0.204 | 4.74E-06 |
| 11 | 116727850 | rs1035237   | G | C |  | 0.921 | -7977.388 | -7977.185 | 0.203 | 4.74E-06 |
| 11 | 116516736 | rs1002037   | C | G |  | 1.068 | -7977.388 | -7977.186 | 0.202 | 4.73E-06 |
| 11 | 116530298 | rs530849    | C | T |  | 1.061 | -7977.388 | -7977.187 | 0.201 | 4.73E-06 |
| 11 | 116902372 | rs7481286   | T | G |  | 1.107 | -7977.388 | -7977.189 | 0.199 | 4.72E-06 |
| 11 | 117410682 | rs2510853   | A | G |  | 1.061 | -7977.388 | -7977.189 | 0.199 | 4.72E-06 |
| 11 | 116756690 | rs74505326  | G | A |  | 0.885 | -7977.388 | -7977.19  | 0.198 | 4.72E-06 |
| 11 | 117793169 | rs75336872  | T | C |  | 0.894 | -7977.388 | -7977.191 | 0.197 | 4.71E-06 |
| 11 | 117572395 | rs55945170  | G | A |  | 0.892 | -7977.388 | -7977.195 | 0.194 | 4.70E-06 |
| 11 | 116732512 | rs2075292   | G | T |  | 0.921 | -7977.388 | -7977.195 | 0.193 | 4.69E-06 |
| 11 | 116865100 | rs74862529  | A | T |  | 1.107 | -7977.388 | -7977.195 | 0.193 | 4.69E-06 |
| 11 | 116865207 | rs75460214  | C | T |  | 1.107 | -7977.388 | -7977.195 | 0.193 | 4.69E-06 |
| 11 | 116865367 | rs79349339  | G | A |  | 1.107 | -7977.388 | -7977.195 | 0.193 | 4.69E-06 |
| 11 | 116867514 | rs1064866   | T | C |  | 1.107 | -7977.388 | -7977.195 | 0.193 | 4.69E-06 |
| 11 | 116976009 | rs142395187 | G | A |  | 1.107 | -7977.388 |           |       |          |

|    |           |             |   |   |   |         |             |   |              |
|----|-----------|-------------|---|---|---|---------|-------------|---|--------------|
| 11 | 120854046 | rs1008966   | T | C | M | Disease | 0.51998934  | M | Disease&NULL |
| 11 | 116900628 | rs139462136 | T | C | M | Disease | 0.521237215 | M | Disease&NULL |
| 11 | 117925581 | rs56204159  | T | C | M | Disease | 0.51998934  | M | Disease&NULL |
| 11 | 116530293 | rs530845    | T | C | M | Disease | 0.51998934  | M | Disease&NULL |
| 11 | 117926172 | rs4938472   | A | T | M | Disease | 0.518741216 | M | Disease&NULL |
| 11 | 116879162 | rs58354636  | G | A | M | Disease | 0.51998934  | M | Disease&NULL |
| 11 | 117905635 | rs1786176   | A | G | M | Disease | 0.51998934  | M | Disease&NULL |
| 11 | 116742626 | rs79849088  | T | C | M | Disease | 0.51998934  | M | Disease&NULL |
| 11 | 116313601 | rs11215937  | G | A | M | Disease | 0.518741216 | M | Disease&NULL |
| 11 | 117434985 | rs752795    | G | C | M | Disease | 0.51998934  | M | Disease&NULL |
| 11 | 117444949 | rs76959909  | A | C | M | Disease | 0.518741216 | M | Disease&NULL |
| 11 | 118931099 | rs620331    | T | C | M | Disease | 0.518741216 | M | Disease&NULL |
| 11 | 116891412 | rs76666535  | A | G | M | Disease | 0.518741216 | M | Disease&NULL |
| 11 | 116897871 | rs76383990  | G | A | M | Disease | 0.518741216 | M | Disease&NULL |
| 11 | 116914260 | rs77822137  | C | T | M | Disease | 0.518741216 | M | Disease&NULL |
| 11 | 116915242 | rs76982250  | T | C | M | Disease | 0.518741216 | M | Disease&NULL |
| 11 | 116917089 | rs118121169 | A | G | M | Disease | 0.518741216 | M | Disease&NULL |
| 11 | 116920199 | rs145949765 | T | C | M | Disease | 0.518741216 | M | Disease&NULL |
| 11 | 116921802 | rs76916861  | T | C | M | Disease | 0.518741216 | M | Disease&NULL |
| 11 | 116934380 | rs150342927 | T | C | M | Disease | 0.518741216 | M | Disease&NULL |
| 11 | 116939370 | rs57072067  | G | A | M | Disease | 0.518741216 | M | Disease&NULL |
| 11 | 116948368 | rs58068870  | C | T | M | Disease | 0.518741216 | M | Disease&NULL |
| 11 | 117350966 | rs11823335  | T | C | M | Disease | 0.518741216 | M | Disease&NULL |
| 11 | 116733310 | rs6589575   | C | T | M | Disease | 0.518741216 | M | Disease&NULL |
| 11 | 116723837 | rs77462380  | T | C | M | Disease | 0.518741216 | M | Disease&NULL |
| 11 | 116724233 | rs75771311  | A | G | M | Disease | 0.518741216 | M | Disease&NULL |
| 11 | 116727547 | rs117910440 | C | T | M | Disease | 0.518741216 | M | Disease&NULL |
| 11 | 116727871 | rs78816728  | C | T | M | Disease | 0.518741216 | M | Disease&NULL |
| 11 | 116728260 | rs75385236  | T | C | M | Disease | 0.518741216 | M | Disease&NULL |
| 11 | 116730980 | rs117833973 | T | C | M | Disease | 0.518741216 | M | Disease&NULL |
| 11 | 117795611 | rs79669568  | C | T | M | Disease | 0.518741216 | M | Disease&NULL |
| 11 | 116707684 | rs2070665   | A | G | M | Disease | 0.518741216 | M | Disease&NULL |
| 11 | 117183650 | rs593245    | T | C | M | Disease | 0.517492858 | M | Disease&NULL |
| 11 | 117479686 | rs4938419   | T | A | M | Disease | 0.517492858 | M | Disease&NULL |
| 11 | 116517968 | rs2187125   | G | T | M | Disease | 0.517492858 | M | Disease&NULL |
| 11 | 119882823 | rs142724980 | T | C | M | Disease | 0.518741216 | M | Disease&NULL |
| 11 | 117444661 | rs75807933  | A | T | M | Disease | 0.517492858 | M | Disease&NULL |
| 11 | 119679013 | rs56221909  | C | G | M | Disease | 0.517492858 | M | Disease&NULL |
| 11 | 120067199 | rs147634995 | A | C | M | Disease | 0.517492858 | M | Disease&NULL |
| 11 | 120420262 | rs11600946  | A | G | M | Disease | 0.517492858 | M | Disease&NULL |
| 11 | 116904279 | rs150817479 | A | G | M | Disease | 0.517492858 | M | Disease&NULL |
| 11 | 116734146 | rs718847    | C | T | M | Disease | 0.516244281 | M | Disease&NULL |
| 11 | 116961819 | rs75202546  | A | G | M | Disease | 0.517492858 | M | Disease&NULL |
| 11 | 116726181 | rs149462130 | T | C | M | Disease | 0.517492858 | M | Disease&NULL |
| 11 | 117466661 | rs145076512 | G | T | M | Disease | 0.517492858 | M | Disease&NULL |
| 11 | 117693971 | rs4938440   | A | G | M | Disease | 0.517492858 | M | Disease&NULL |
| 11 | 120415158 | rs4936519   | T | G | M | Disease | 0.516244281 | M | Disease&NULL |
| 11 | 121066079 | rs9943635   | T | C | M | Disease | 0.516244281 | M | Disease&NULL |
| 11 | 121073219 | rs516495    | C | T | M | Disease | 0.516244281 | M | Disease&NULL |
| 11 | 117474492 | rs77259443  | G | A | M | Disease | 0.517492858 | M | Disease&NULL |
| 11 | 119951570 | rs10892532  | G | A | M | Disease | 0.516244281 | M | Disease&NULL |
| 11 | 116275617 | rs4586206   | A | G | M | Disease | 0.516244281 | M | Disease&NULL |
| 11 | 117563458 | rs145253564 | T | C | M | Disease | 0.517492858 | M | Disease&NULL |
| 11 | 117564084 | rs139289629 | C | G | M | Disease | 0.517492858 | M | Disease&NULL |
| 11 | 116317789 | rs56287831  | A | G | M | Disease | 0.516244281 | M | Disease&NULL |
| 11 | 118984287 | rs4938630   | A | C | M | Disease | 0.516244281 | M | Disease&NULL |
| 11 | 121015228 | rs11218160  | A | G | M | Disease | 0.516244281 | M | Disease&NULL |
| 11 | 118973113 | rs3825059   | A | C | M | Disease | 0.516244281 | M | Disease&NULL |
| 11 | 119679613 | rs10790347  | T | A | M | Disease | 0.516244281 | M | Disease&NULL |
| 11 | 118240332 | rs11216860  | C | T | M | Disease | 0.514995502 | M | Disease&NULL |
| 11 | 120412053 | rs78566287  | T | C | M | Disease | 0.516244281 | M | Disease&NULL |
| 11 | 121071633 | rs201644901 | C | A | M | Disease | 0.514995502 | M | Disease&NULL |
| 11 | 116369171 | rs925151    | A | G | M | Disease | 0.514995502 | M | Disease&NULL |
| 11 | 116667337 | rs633389    | T | C | M | Disease | 0.516244281 | M | Disease&NULL |
| 11 | 116798503 | rs75176087  | T | C | M | Disease | 0.516244281 | M | Disease&NULL |
| 11 | 116808658 | rs147683288 | T | C | M | Disease | 0.516244281 | M | Disease&NULL |
| 11 | 116813938 | rs117772632 | A | T | M | Disease | 0.516244281 | M | Disease&NULL |
| 11 | 116815265 | rs61301656  | A | G | M | Disease | 0.516244281 | M | Disease&NULL |
| 11 | 116823800 | rs79143833  | C | G | M | Disease | 0.516244281 | M | Disease&NULL |
| 11 | 116831357 | rs74922395  | C | T | M | Disease | 0.516244281 | M | Disease&NULL |
| 11 | 116838219 | rs75296049  | C | T | M | Disease | 0.516244281 | M | Disease&NULL |
| 11 | 116839420 | rs78672214  | G | A | M | Disease | 0.516244281 | M | Disease&NULL |
| 11 | 116843747 | rs74655990  | C | T | M | Disease | 0.516244281 | M | Disease&NULL |
| 11 | 116853151 | rs58123174  | A | C | M | Disease | 0.516244281 | M | Disease&NULL |
| 11 | 116871192 | rs79523757  | C | T | M | Disease | 0.516244281 | M | Disease&NULL |
| 11 | 116872657 | rs76919167  | C | A | M | Disease | 0.516244281 | M | Disease&NULL |
| 11 | 116873188 | rs75216082  | C | T | M | Disease | 0.516244281 | M | Disease&NULL |
| 11 | 116873956 | rs77322057  | C | T | M | Disease | 0.516244281 | M | Disease&NULL |
| 11 | 116876136 | rs78903015  | T | G | M | Disease | 0.516244281 | M | Disease&NULL |
| 11 | 120528055 | rs77101138  | G | A | M | Disease | 0.516244281 | M | Disease&NULL |
| 11 | 117474580 | rs11216466  | A | C | M | Disease | 0.514995502 | M | Disease&NULL |
| 11 | 118466646 | rs184841209 | T | G | M | Disease | 0.514995502 | M | Disease&NULL |
| 11 | 119813015 | rs112084975 | T | C | M | Disease | 0.514995502 | M | Disease&NULL |
| 11 | 119813599 | rs77256135  | A | G | M | Disease | 0.514995502 | M | Disease&NULL |
| 11 | 120247033 | rs632137    | T | C | M | Disease | 0.514995502 | M | Disease&NULL |
| 11 | 117581459 | rs76474385  | C | T | M | Disease | 0.514995502 | M | Disease&NULL |
| 11 | 118298428 | rs78342015  | T | C | M | Disease | 0.514995502 | M | Disease&NULL |
| 11 | 120723872 | rs4598681   | T | G | M | Disease | 0.513746535 | M | Disease&NULL |
| 11 | 116398570 | rs147224199 | T | C | M | Disease | 0.514995502 | M | Disease&NULL |
| 11 | 116415864 | rs76338210  | T | C | M | Disease | 0.513746535 | M | Disease&NULL |
| 11 | 116239742 | rs567559    | G | C | M | Disease | 0.513746535 | M | Disease&NULL |
| 11 | 117503394 | rs4936393   | G | A | M | Disease | 0.513746535 | M | Disease&NULL |
| 11 | 118020130 | rs34913450  | C | T | M | Disease | 0.513746535 | M | Disease&NULL |
| 11 | 121192650 | rs964256    | G | C | M | Disease | 0.513746535 | M | Disease&NULL |
| 11 | 116300734 | rs11215928  | T | C | M | Disease | 0.513746535 | M | Disease&NULL |
| 11 | 117447735 | rs142639145 | G | A | M | Disease | 0.514995502 | M | Disease&NULL |

|    |           |             |   |   |  |       |           |           |       |          |
|----|-----------|-------------|---|---|--|-------|-----------|-----------|-------|----------|
| 11 | 120854046 | rs1008966   | T | C |  | 1.062 | -7977.388 | -7977.23  | 0.159 | 4.53E-06 |
| 11 | 116900628 | rs139462136 | T | C |  | 1.137 | -7977.388 | -7977.23  | 0.158 | 4.53E-06 |
| 11 | 117925581 | rs56204159  | T | C |  | 0.94  | -7977.388 | -7977.23  | 0.158 | 4.53E-06 |
| 11 | 116530293 | rs530845    | T | C |  | 1.061 | -7977.388 | -7977.233 | 0.155 | 4.52E-06 |
| 11 | 117926172 | rs4938472   | A | T |  | 0.94  | -7977.388 | -7977.236 | 0.152 | 4.50E-06 |
| 11 | 116879162 | rs58354636  | G | A |  | 1.121 | -7977.388 | -7977.237 | 0.151 | 4.50E-06 |
| 11 | 117905635 | rs1786176   | A | G |  | 1.091 | -7977.388 | -7977.237 | 0.151 | 4.50E-06 |
| 11 | 116742626 | rs79849088  | T | C |  | 1.121 | -7977.388 | -7977.238 | 0.15  | 4.49E-06 |
| 11 | 116313601 | rs11215937  | G | A |  | 0.903 | -7977.388 | -7977.239 | 0.149 | 4.49E-06 |
| 11 | 117434985 | rs752795    | G | C |  | 0.88  | -7977.388 | -7977.243 | 0.146 | 4.48E-06 |
| 11 | 117444949 | rs76959909  | A | C |  | 1.092 | -7977.388 | -7977.242 | 0.146 | 4.48E-06 |
| 11 | 118931099 | rs620331    | T | C |  | 1.079 | -7977.388 | -7977.242 | 0.146 | 4.48E-06 |
| 11 | 116891412 | rs76666535  | A | G |  | 1.121 | -7977.388 | -7977.243 | 0.145 | 4.47E-06 |
| 11 | 116897871 | rs76383990  | G | A |  | 1.121 | -7977.388 | -7977.243 | 0.145 | 4.47E-06 |
| 11 | 116914260 | rs77822137  | C | T |  | 1.121 | -7977.388 | -7977.243 | 0.145 | 4.47E-06 |
| 11 | 116915242 | rs76982250  | T | C |  | 1.121 | -7977.388 | -7977.243 | 0.145 | 4.47E-06 |
| 11 | 116917089 | rs118121169 | A | G |  | 1.121 | -7977.388 | -7977.243 | 0.145 | 4.47E-06 |
| 11 | 116920199 | rs145949765 | T | C |  | 1.121 | -7977.388 | -7977.243 | 0.145 | 4.47E-06 |
| 11 | 116921802 | rs76916861  | T | C |  | 1.121 | -7977.388 | -7977.243 | 0.145 | 4.47E-06 |
| 11 | 116934380 | rs150342927 | T | C |  | 1.121 | -7977.388 | -7977.243 | 0.145 | 4.47E-06 |
| 11 | 116939370 | rs57072067  | G | A |  | 1.121 | -7977.388 | -7977.243 | 0.145 | 4.47E-06 |
| 11 | 116948368 | rs58068870  | C | T |  | 1.121 | -7977.388 | -7977.243 | 0.145 | 4.47E-06 |
| 11 | 117350966 | rs11823335  | T | C |  | 1.07  | -7977.388 | -7977.244 | 0.145 | 4.47E-06 |
| 11 | 116733310 | rs6589575   | C | T |  | 0.922 | -7977.388 | -7977.245 | 0.144 | 4.47E-06 |
| 11 | 116723837 | rs77462380  | T | C |  | 1.121 | -7977.388 | -7977.246 | 0.142 | 4.46E-06 |
| 11 | 116724233 | rs75771311  | A | G |  | 1.121 | -7977.388 | -7977.246 | 0.142 | 4.46E-06 |
| 11 | 116727547 | rs117910440 | C | T |  | 1.121 | -7977.388 | -7977.246 | 0.142 | 4.46E-06 |
| 11 | 116727871 | rs78816728  | C | T |  | 1.121 | -7977.388 | -7977.246 | 0.142 | 4.46E-06 |
| 11 | 116728260 | rs75385236  | T | C |  | 1.121 | -7977.388 | -7977.246 | 0.142 | 4.46E-06 |
| 11 | 116730980 | rs117833973 | T | C |  | 1.121 | -7977.388 | -7977.246 | 0.142 | 4.46E-06 |
| 11 | 117795611 | rs79669568  | C | T |  | 0.898 | -7977.388 | -7977.246 | 0.142 | 4.46E-06 |
| 11 | 116707684 | rs2070665   | A | G |  | 0.914 | -7977.388 | -7977.247 | 0.141 | 4.45E-06 |
|    |           |             |   |   |  |       |           |           |       |          |

|    |           |              |   |   |   |         |             |   |              |
|----|-----------|--------------|---|---|---|---------|-------------|---|--------------|
| 11 | 117447871 | rs116997303  | C | T | M | Disease | 0.514995502 | M | Disease&NULL |
| 11 | 121076938 | rs614634     | T | C | M | Disease | 0.513746535 | M | Disease&NULL |
| 11 | 117565794 | rs138159885  | A | G | M | Disease | 0.513746535 | M | Disease&NULL |
| 11 | 117565876 | rs17587869   | T | G | M | Disease | 0.513746535 | M | Disease&NULL |
| 11 | 117566372 | rs17664522   | G | T | M | Disease | 0.513746535 | M | Disease&NULL |
| 11 | 117567237 | rs150057425  | G | A | M | Disease | 0.513746535 | M | Disease&NULL |
| 11 | 119812958 | rs112736310  | T | C | M | Disease | 0.513746535 | M | Disease&NULL |
| 11 | 120425668 | rs75352872   | T | G | M | Disease | 0.513746535 | M | Disease&NULL |
| 11 | 116985857 | rs60834024   | A | C | M | Disease | 0.512497396 | M | Disease&NULL |
| 11 | 120309460 | rs17484168   | T | C | M | Disease | 0.512497396 | M | Disease&NULL |
| 11 | 116914662 | rs77953286   | C | G | M | Disease | 0.512497396 | M | Disease&NULL |
| 11 | 119566235 | rs118029883  | A | G | M | Disease | 0.513746535 | M | Disease&NULL |
| 11 | 117463436 | rs4938412    | T | G | M | Disease | 0.513746535 | M | Disease&NULL |
| 11 | 117466663 | rs76630213   | G | T | M | Disease | 0.513746535 | M | Disease&NULL |
| 11 | 121090162 | rs619998     | C | T | M | Disease | 0.512497396 | M | Disease&NULL |
| 11 | 119720735 | rs73008657   | A | G | M | Disease | 0.512497396 | M | Disease&NULL |
| 11 | 119811734 | rs12269853   | G | C | M | Disease | 0.512497396 | M | Disease&NULL |
| 11 | 121073887 | rs656189     | A | T | M | Disease | 0.511248102 | M | Disease&NULL |
| 11 | 116761815 | rs146418192  | C | G | M | Disease | 0.512497396 | M | Disease&NULL |
| 11 | 116409788 | rs951839     | A | C | M | Disease | 0.511248102 | M | Disease&NULL |
| 11 | 116343033 | rs67215893   | A | G | M | Disease | 0.511248102 | M | Disease&NULL |
| 11 | 116667480 | rs633867     | T | C | M | Disease | 0.512497396 | M | Disease&NULL |
| 11 | 120589674 | rs2846107    | A | G | M | Disease | 0.511248102 | M | Disease&NULL |
| 11 | 117399649 | rs7126416    | A | C | M | Disease | 0.511248102 | M | Disease&NULL |
| 11 | 117429793 | rs112793334  | A | C | M | Disease | 0.511248102 | M | Disease&NULL |
| 11 | 117564067 | rs150824999  | T | C | M | Disease | 0.511248102 | M | Disease&NULL |
| 11 | 118602497 | rs478081     | G | A | M | Disease | 0.509998667 | M | Disease&NULL |
| 11 | 116951926 | rs80068626   | C | T | M | Disease | 0.511248102 | M | Disease&NULL |
| 11 | 116952296 | rs141474528  | G | C | M | Disease | 0.511248102 | M | Disease&NULL |
| 11 | 116993788 | rs12420361   | A | G | M | Disease | 0.511248102 | M | Disease&NULL |
| 11 | 117444884 | rs4938411    | A | G | M | Disease | 0.511248102 | M | Disease&NULL |
| 11 | 119548402 | rs78809001   | T | C | M | Disease | 0.511248102 | M | Disease&NULL |
| 11 | 120235874 | rs661139     | A | T | M | Disease | 0.509998667 | M | Disease&NULL |
| 11 | 117302538 | rs147189349  | A | G | M | Disease | 0.509998667 | M | Disease&NULL |
| 11 | 117429034 | rs479591     | G | A | M | Disease | 0.509998667 | M | Disease&NULL |
| 11 | 116957158 | rs142836613  | G | A | M | Disease | 0.509998667 | M | Disease&NULL |
| 11 | 117336961 | rs12418126   | G | A | M | Disease | 0.509998667 | M | Disease&NULL |
| 11 | 116759655 | rs17174502   | A | G | M | Disease | 0.509998667 | M | Disease&NULL |
| 11 | 116788837 | rs1135663    | T | C | M | Disease | 0.509998667 | M | Disease&NULL |
| 11 | 119556519 | rs75967483   | T | C | M | Disease | 0.509998667 | M | Disease&NULL |
| 11 | 120697099 | rs11218017   | G | A | M | Disease | 0.508749107 | M | Disease&NULL |
| 11 | 117536090 | rs687100     | T | C | M | Disease | 0.508749107 | M | Disease&NULL |
| 11 | 117793222 | rs112048745  | T | C | M | Disease | 0.508749107 | M | Disease&NULL |
| 11 | 117443368 | rs78012672   | A | G | M | Disease | 0.509998667 | M | Disease&NULL |
| 11 | 120795955 | rs117508216  | C | A | M | Disease | 0.509998667 | M | Disease&NULL |
| 11 | 117574923 | rs58499675   | C | T | M | Disease | 0.509998667 | M | Disease&NULL |
| 11 | 117158168 | rs45497100   | T | A | M | Disease | 0.508749107 | M | Disease&NULL |
| 11 | 117988082 | rs642215     | T | C | M | Disease | 0.508749107 | M | Disease&NULL |
| 11 | 116731744 | rs75501351   | G | T | M | Disease | 0.508749107 | M | Disease&NULL |
| 11 | 117443936 | rs17120893   | T | C | M | Disease | 0.508749107 | M | Disease&NULL |
| 11 | 117616982 | rs1443827410 | G | A | M | Disease | 0.508749107 | M | Disease&NULL |
| 11 | 117909810 | rs80170872   | A | G | M | Disease | 0.508749107 | M | Disease&NULL |
| 11 | 117477245 | rs79656669   | C | T | M | Disease | 0.508749107 | M | Disease&NULL |
| 11 | 117470795 | rs80138815   | G | A | M | Disease | 0.507499438 | M | Disease&NULL |
| 11 | 118492713 | rs45457998   | G | A | M | Disease | 0.507499438 | M | Disease&NULL |
| 11 | 118810405 | rs4938589    | T | C | M | Disease | 0.507499438 | M | Disease&NULL |
| 11 | 119811767 | rs78927965   | A | C | M | Disease | 0.507499438 | M | Disease&NULL |
| 11 | 117441703 | rs10502226   | G | T | M | Disease | 0.507499438 | M | Disease&NULL |
| 11 | 117466540 | rs1452979329 | A | G | M | Disease | 0.506249674 | M | Disease&NULL |
| 11 | 118602058 | rs562059     | G | T | M | Disease | 0.506249674 | M | Disease&NULL |
| 11 | 116937127 | rs142661919  | G | A | M | Disease | 0.507499438 | M | Disease&NULL |
| 11 | 116937146 | rs117518542  | A | G | M | Disease | 0.507499438 | M | Disease&NULL |
| 11 | 116749190 | rs150818481  | A | G | M | Disease | 0.507499438 | M | Disease&NULL |
| 11 | 117711092 | rs1321012057 | A | G | M | Disease | 0.506249674 | M | Disease&NULL |
| 11 | 120253329 | rs34189224   | A | G | M | Disease | 0.506249674 | M | Disease&NULL |
| 11 | 119529365 | rs1467050    | T | C | M | Disease | 0.506249674 | M | Disease&NULL |
| 11 | 117600086 | rs147019067  | A | C | M | Disease | 0.507499438 | M | Disease&NULL |
| 11 | 117945171 | rs3758992    | C | G | M | Disease | 0.506249674 | M | Disease&NULL |
| 11 | 116534026 | rs151215655  | T | C | M | Disease | 0.506249674 | M | Disease&NULL |
| 11 | 116992685 | rs74955808   | A | G | M | Disease | 0.506249674 | M | Disease&NULL |
| 11 | 116979363 | rs12416941   | A | G | M | Disease | 0.504999833 | M | Disease&NULL |
| 11 | 116707583 | rs5072       | A | G | M | Disease | 0.504999833 | M | Disease&NULL |
| 11 | 116996711 | rs12419459   | T | C | M | Disease | 0.504999833 | M | Disease&NULL |
| 11 | 116980021 | rs12271169   | G | C | M | Disease | 0.504999833 | M | Disease&NULL |
| 11 | 120718086 | rs11218029   | A | T | M | Disease | 0.504999833 | M | Disease&NULL |
| 11 | 117988223 | rs643014     | G | A | M | Disease | 0.504999833 | M | Disease&NULL |
| 11 | 116269990 | rs2226637    | C | G | M | Disease | 0.50374993  | M | Disease&NULL |
| 11 | 118973112 | rs3825060    | A | G | M | Disease | 0.504999833 | M | Disease&NULL |
| 11 | 117440220 | rs150854359  | G | T | M | Disease | 0.504999833 | M | Disease&NULL |
| 11 | 118121356 | rs147710683  | T | C | M | Disease | 0.504999833 | M | Disease&NULL |
| 11 | 117185634 | rs2510446    | C | T | M | Disease | 0.50374993  | M | Disease&NULL |
| 11 | 117352086 | rs12363073   | T | C | M | Disease | 0.504999833 | M | Disease&NULL |
| 11 | 120588562 | rs2852225    | T | G | M | Disease | 0.50374993  | M | Disease&NULL |
| 11 | 116985191 | rs74882651   | A | G | M | Disease | 0.50374993  | M | Disease&NULL |
| 11 | 117458098 | rs190567289  | T | C | M | Disease | 0.504999833 | M | Disease&NULL |
| 11 | 116356422 | rs73009144   | A | G | M | Disease | 0.50374993  | M | Disease&NULL |
| 11 | 117275887 | rs7123784    | C | G | M | Disease | 0.50374993  | M | Disease&NULL |
| 11 | 119382089 | rs79235532   | A | G | M | Disease | 0.50374993  | M | Disease&NULL |
| 11 | 116759706 | rs117920151  | C | G | M | Disease | 0.50374993  | M | Disease&NULL |
| 11 | 116307648 | rs76200167   | A | C | M | Disease | 0.50374993  | M | Disease&NULL |
| 11 | 117605620 | rs117399581  | A | G | M | Disease | 0.50374993  | M | Disease&NULL |
| 11 | 117569803 | rs147776682  | T | C | M | Disease | 0.50374993  | M | Disease&NULL |
| 11 | 117570297 | rs145111226  | T | C | M | Disease | 0.50374993  | M | Disease&NULL |
| 11 | 117570660 | rs149084104  | C | G | M | Disease | 0.50374993  | M | Disease&NULL |
| 11 | 116982434 | rs111677878  | T | C | M | Disease | 0.502499979 | M | Disease&NULL |
| 11 | 117464630 | rs77230637   | A | G | M | Disease | 0.502499979 | M | Disease&NULL |

|    |           |             |   |   |  |  |       |           |           |       |          |
|----|-----------|-------------|---|---|--|--|-------|-----------|-----------|-------|----------|
| 11 | 117447871 | rs116997303 | C | T |  |  | 0.883 | -7977.388 | -7977.284 | 0.105 | 4.30E-06 |
| 11 | 121076938 | rs614634    | T | C |  |  | 0.934 | -7977.388 | -7977.284 | 0.104 | 4.29E-06 |
| 11 | 117565794 | rs138159885 | A | G |  |  | 0.878 | -7977.388 | -7977.286 | 0.103 | 4.29E-06 |
| 11 | 117565876 | rs17587869  | T | G |  |  | 0.878 | -7977.388 | -7977.286 | 0.103 | 4.29E-06 |
| 11 | 117566372 | rs17664522  | G | T |  |  | 0.878 | -7977.388 | -7977.286 | 0.103 | 4.29E-06 |
| 11 | 117567237 | rs150057425 | G | A |  |  | 0.878 | -7977.388 | -7977.286 | 0.103 | 4.29E-06 |
| 11 | 119812958 | rs112736310 | T | C |  |  | 1.102 | -7977.388 | -7977.286 | 0.102 | 4.28E-06 |
| 11 | 120425668 | rs75352872  | T | G |  |  | 1.129 | -7977.388 | -7977.287 | 0.102 | 4.28E-06 |
| 11 | 116985857 | rs60834024  | A | C |  |  | 1.102 | -7977.388 | -7977.289 | 0.099 | 4.27E-06 |
| 11 | 120309460 | rs17484168  | T | C |  |  | 0.904 | -7977.388 | -7977.29  | 0.098 | 4.27E-06 |
| 11 | 116914662 | rs77953286  | C | G |  |  | 1.119 | -7977.388 | -7977.292 | 0.096 | 4.26E-06 |
| 11 | 119566235 | rs118029883 | A | G |  |  | 0.88  | -7977.388 | -7977.292 | 0.096 | 4.26E-06 |
| 11 | 117463436 | rs4938412   | T | G |  |  | 0.883 | -7977.388 | -7977.293 | 0.095 | 4.25E-06 |
| 11 | 117466663 | rs76630213  | G | T |  |  | 0.883 | -7977.388 | -7977.293 | 0.095 | 4.25E-06 |
| 11 | 121090162 | rs619998    | C | T |  |  | 0.934 | -7977.388 | -7977.293 | 0.095 | 4.25E-06 |
| 11 | 119720735 | rs73008657  | A | G |  |  | 1.082 | -7977.388 | -7977.295 | 0.093 | 4.25E-06 |
| 11 | 119811734 | rs12269853  | G | C |  |  | 1.102 | -7977.388 | -7977.295 | 0.093 | 4.25E-06 |
| 11 | 121073887 | rs656189    | A | T |  |  | 0.934 | -7977.388 | -7977.298 | 0.091 | 4.24E-06 |
| 11 | 116761815 | rs146418192 | C | G |  |  | 1.134 | -7977.388 | -7977.299 | 0.089 | 4.23E-06 |
| 11 | 116409788 | rs951839    | A | C |  |  | 1.076 | -7977.388 | -7977.301 | 0.088 | 4.22E-06 |
| 11 | 116343033 | rs67215893  | A | G |  |  | 0.922 | -7977.388 | -7977.302 | 0.087 | 4.22E-06 |
| 11 | 116667480 | rs633867    | T | C |  |  | 0.887 | -7977.388 | -7977.301 | 0.087 | 4.22E-06 |
| 11 | 120589674 | rs2846107   | A | G |  |  | 0.921 | -7977.388 | -7977.301 | 0.087 | 4.22E-06 |
| 11 | 117399649 | rs7126416   | A | C |  |  | 1.065 | -7977.388 | -7977.302 | 0.086 | 4.22E-06 |
| 11 | 117429793 | rs112793334 | A | C |  |  | 0.885 | -7977.388 | -7977.304 | 0.084 | 4.21E-06 |
| 11 | 117564067 | rs150824999 | T | C |  |  | 0.88  | -7977.388 | -7977.306 | 0.083 | 4.20E-06 |
| 11 | 118602497 | rs478081    | G | A |  |  | 1.062 | -7977.388 | -7977.307 | 0.082 | 4.20E-06 |
| 11 | 116951926 | rs80068626  | C | T |  |  | 1.117 | -7977.388 | -7977.308 | 0.081 | 4.19E-06 |
| 11 | 116952296 | rs141474528 | G | C |  |  | 1.117 | -7977.388 | -7977.308 | 0.081 | 4.19E-06 |
| 11 | 116993788 | rs12420361  | A | G |  |  | 1.101 | -7977.388 | -7977.308 | 0.081 | 4.19E-06 |
| 11 | 117444884 | rs4938411   | A | G |  |  | 0.884 | -7977.388 | -7977.308 | 0.08  | 4.       |

|    |            |             |   |   |           |             |                |
|----|------------|-------------|---|---|-----------|-------------|----------------|
| 11 | 117477867  | rs1939235   | T | C | M_Disease | 0.502499979 | M_Disease&NULL |
| 11 | 117560438  | rs75707401  | A | G | M_Disease | 0.502499979 | M_Disease&NULL |
| 11 | 121077211  | rs509058    | T | C | M_Disease | 0.501249997 | M_Disease&NULL |
| 11 | 119807902  | rs75012772  | A | G | M_Disease | 0.502499979 | M_Disease&NULL |
| 11 | 120715471  | rs74702343  | A | G | M_Disease | 0.502499979 | M_Disease&NULL |
| 11 | 116860781  | rs75292554  | C | T | M_Disease | 0.502499979 | M_Disease&NULL |
| 11 | 116866944  | rs143367870 | C | A | M_Disease | 0.502499979 | M_Disease&NULL |
| 11 | 119556950  | rs61901099  | T | C | M_Disease | 0.502499979 | M_Disease&NULL |
| 11 | 119802424  | rs754872    | T | C | M_Disease | 0.502499979 | M_Disease&NULL |
| 11 | 119510366  | rs4438048   | T | C | M_Disease | 0.501249997 | M_Disease&NULL |
| 11 | 119984598  | rs76031864  | A | G | M_Disease | 0.501249997 | M_Disease&NULL |
| 11 | 118749318  | rs78312641  | A | T | M_Disease | 0.501249997 | M_Disease&NULL |
| 11 | 116409433  | rs17491510  | T | C | M_Disease | 0.501249997 | M_Disease&NULL |
| 11 | 116864639  | rs76665318  | C | T | M_Disease | 0.501249997 | M_Disease&NULL |
| 11 | 119813686  | rs76661054  | C | T | M_Disease | 0.501249997 | M_Disease&NULL |
| 11 | 119813733  | rs75224487  | T | C | M_Disease | 0.501249997 | M_Disease&NULL |
| 11 | 119814337  | rs111902338 | A | C | M_Disease | 0.501249997 | M_Disease&NULL |
| 11 | 119512641  | rs2089647   | G | A | M_Disease | 0.501249997 | M_Disease&NULL |
| 11 | 120413702  | rs75510322  | C | A | M_Disease | 0.501249997 | M_Disease&NULL |
| 11 | 116294664  | rs471750    | G | A | M_Disease | 0.501249997 | M_Disease&NULL |
| 11 | 117338330  | rs495171    | C | T | M_Disease | 0.501249997 | M_Disease&NULL |
| 11 | 119934934  | rs4938763   | T | C | NULL      | 0.5         | NULL&M_Disease |
| 11 | 116980679  | rs114221654 | T | C | NULL      | 0.5         | NULL&M_Disease |
| 11 | 116981515  | rs116770907 | T | C | NULL      | 0.5         | NULL&M_Disease |
| 11 | 116539058  | rs112464350 | A | C | NULL      | 0.5         | NULL&M_Disease |
| 11 | 117414714  | rs3802879   | T | G | NULL      | 0.5         | NULL&M_Disease |
| 11 | 117587224  | rs56153022  | G | C | NULL      | 0.501249997 | M_Disease&NULL |
| 11 | 118807637  | rs112974653 | T | G | NULL      | 0.5         | NULL&M_Disease |
| 11 | 119807543  | rs79710878  | G | A | NULL      | 0.5         | NULL&M_Disease |
| 11 | 119808101  | rs77763933  | C | G | NULL      | 0.5         | NULL&M_Disease |
| 11 | 116996631  | rs12419454  | T | C | NULL      | 0.5         | NULL&M_Disease |
| 11 | 116996783  | rs12416691  | T | A | NULL      | 0.5         | NULL&M_Disease |
| 11 | 117391421  | rs77964702  | A | G | NULL      | 0.5         | NULL&M_Disease |
| 11 | 116953338  | rs79552834  | C | G | NULL      | 0.5         | NULL&M_Disease |
| 11 | 119675931  | rs7926586   | G | T | NULL      | 0.501249997 | NULL&M_Disease |
| 11 | 116692552  | rs5103      | G | A | NULL      | 0.5         | NULL&M_Disease |
| 11 | 116996345  | rs17120344  | A | G | NULL      | 0.5         | NULL&M_Disease |
| 11 | 119510644  | rs7940667   | A | C | NULL      | 0.501249997 | NULL&M_Disease |
| 11 | 119512115  | rs2089646   | G | A | NULL      | 0.501249997 | NULL&M_Disease |
| 11 | 116530797  | rs558056    | T | G | NULL      | 0.501249997 | NULL&M_Disease |
| 11 | 119510303  | rs4245199   | G | T | NULL      | 0.501249997 | NULL&M_Disease |
| 11 | 117414030  | rs563531    | A | G | NULL      | 0.501249997 | NULL&M_Disease |
| 11 | 119678445  | rs7945067   | T | C | NULL      | 0.501249997 | NULL&M_Disease |
| 11 | 120176979  | rs10750171  | G | T | NULL      | 0.501249997 | NULL&M_Disease |
| 11 | 119806581  | rs77443589  | A | G | NULL      | 0.501249997 | NULL&M_Disease |
| 11 | 119806699  | rs79137748  | C | T | NULL      | 0.501249997 | NULL&M_Disease |
| 11 | 116481694  | rs73578509  | G | C | NULL      | 0.5         | NULL&M_Disease |
| 11 | 116317745  | rs569327    | T | C | NULL      | 0.501249997 | NULL&M_Disease |
| 11 | 116207020  | rs7947688   | G | A | NULL      | 0.501249997 | NULL&M_Disease |
| 11 | 121152465  | rs11607048  | G | T | NULL      | 0.501249997 | NULL&M_Disease |
| 11 | 116296243  | rs693603    | A | G | NULL      | 0.502499979 | NULL&M_Disease |
| 11 | 116237696  | rs79733808  | A | G | NULL      | 0.502499979 | NULL&M_Disease |
| 11 | 116750073  | rs543819    | G | A | NULL      | 0.502499979 | NULL&M_Disease |
| 11 | 117795578  | rs77642243  | C | T | NULL      | 0.502499979 | NULL&M_Disease |
| 11 | 119882908  | rs587806    | T | C | NULL      | 0.502499979 | NULL&M_Disease |
| 11 | 117931489  | rs7112429   | A | T | NULL      | 0.501249997 | NULL&M_Disease |
| 11 | 117937225  | rs60007061  | A | C | NULL      | 0.501249997 | NULL&M_Disease |
| 11 | 1121069225 | rs12288505  | T | C | NULL      | 0.502499979 | NULL&M_Disease |
| 11 | 117899816  | rs617345    | G | T | NULL      | 0.502499979 | NULL&M_Disease |
| 11 | 117521603  | rs678327    | A | G | NULL      | 0.502499979 | NULL&M_Disease |
| 11 | 118560857  | rs73001406  | A | G | NULL      | 0.502499979 | NULL&M_Disease |
| 11 | 120858410  | rs2282586   | A | G | NULL      | 0.502499979 | NULL&M_Disease |
| 11 | 120503923  | rs4936534   | T | A | NULL      | 0.50374993  | NULL&M_Disease |
| 11 | 117492181  | rs10750108  | A | G | NULL      | 0.50374993  | NULL&M_Disease |
| 11 | 118809329  | rs10892313  | A | G | NULL      | 0.50374993  | NULL&M_Disease |
| 11 | 116700777  | rs618354    | C | G | NULL      | 0.50374993  | NULL&M_Disease |
| 11 | 116752191  | rs73023056  | A | G | NULL      | 0.502499979 | NULL&M_Disease |
| 11 | 116534963  | rs12802672  | G | A | NULL      | 0.50374993  | NULL&M_Disease |
| 11 | 116539809  | rs112550319 | G | C | NULL      | 0.50374993  | NULL&M_Disease |
| 11 | 116448277  | rs73011154  | C | A | NULL      | 0.50374993  | NULL&M_Disease |
| 11 | 116234127  | rs576510    | G | C | NULL      | 0.50374993  | NULL&M_Disease |
| 11 | 116966878  | rs60167594  | C | T | NULL      | 0.50374993  | NULL&M_Disease |
| 11 | 120397891  | rs75195561  | T | C | NULL      | 0.50374993  | NULL&M_Disease |
| 11 | 120237971  | rs61900791  | T | C | NULL      | 0.50374993  | NULL&M_Disease |
| 11 | 120557393  | rs78813250  | T | G | NULL      | 0.50374993  | NULL&M_Disease |
| 11 | 117421984  | rs565083    | A | G | NULL      | 0.504999833 | NULL&M_Disease |
| 11 | 120734139  | rs10892631  | A | G | NULL      | 0.504999833 | NULL&M_Disease |
| 11 | 118750967  | rs11602393  | A | T | NULL      | 0.504999833 | NULL&M_Disease |
| 11 | 116968440  | rs75830246  | C | T | NULL      | 0.50374993  | NULL&M_Disease |
| 11 | 117650725  | rs11216542  | T | C | NULL      | 0.504999833 | NULL&M_Disease |
| 11 | 120568363  | rs116534827 | G | C | NULL      | 0.504999833 | NULL&M_Disease |
| 11 | 120568477  | rs61902689  | T | G | NULL      | 0.504999833 | NULL&M_Disease |
| 11 | 116964942  | rs77374709  | T | C | NULL      | 0.504999833 | NULL&M_Disease |
| 11 | 116965555  | rs117812708 | G | A | NULL      | 0.504999833 | NULL&M_Disease |
| 11 | 119592965  | rs117512890 | C | T | NULL      | 0.504999833 | NULL&M_Disease |
| 11 | 116980858  | rs7112111   | G | T | NULL      | 0.506249674 | NULL&M_Disease |
| 11 | 120445422  | rs4447186   | G | A | NULL      | 0.504999833 | NULL&M_Disease |
| 11 | 116437423  | rs17492275  | T | C | NULL      | 0.506249674 | NULL&M_Disease |
| 11 | 117415385  | rs7111299   | A | C | NULL      | 0.506249674 | NULL&M_Disease |
| 11 | 120509726  | rs6589825   | C | T | NULL      | 0.506249674 | NULL&M_Disease |
| 11 | 120556274  | rs80170882  | T | C | NULL      | 0.504999833 | NULL&M_Disease |
| 11 | 117517424  | rs537592    | C | T | NULL      | 0.506249674 | NULL&M_Disease |
| 11 | 118755738  | rs523604    | G | A | NULL      | 0.506249674 | NULL&M_Disease |
| 11 | 117775198  | rs12797743  | G | A | NULL      | 0.506249674 | NULL&M_Disease |
| 11 | 117987128  | rs592009    | G | T | NULL      | 0.506249674 | NULL&M_Disease |
| 11 | 116298294  | rs61134913  | G | A | NULL      | 0.506249674 | NULL&M_Disease |

|    |           |             |   |   |  |       |           |           |        |          |
|----|-----------|-------------|---|---|--|-------|-----------|-----------|--------|----------|
| 11 | 117477867 | rs1939235   | T | C |  | 0.89  | -7977.388 | -7977.374 | 0.014  | 3.92E-06 |
| 11 | 117560438 | rs75707401  | A | G |  | 0.892 | -7977.388 | -7977.377 | 0.012  | 3.91E-06 |
| 11 | 121077211 | rs509058    | T | C |  | 0.935 | -7977.388 | -7977.377 | 0.012  | 3.91E-06 |
| 11 | 119807902 | rs75012772  | A | G |  | 1.098 | -7977.388 | -7977.378 | 0.01   | 3.91E-06 |
| 11 | 120715471 | rs74702343  | A | G |  | 0.892 | -7977.388 | -7977.378 | 0.01   | 3.91E-06 |
| 11 | 116860781 | rs75292554  | C | T |  | 1.113 | -7977.388 | -7977.379 | 0.009  | 3.90E-06 |
| 11 | 116866944 | rs143367870 | C | A |  | 1.113 | -7977.388 | -7977.379 | 0.009  | 3.90E-06 |
| 11 | 119556950 | rs61901099  | T | C |  | 1.117 | -7977.388 | -7977.379 | 0.009  | 3.90E-06 |
| 11 | 119802424 | rs754872    | T | C |  | 0.905 | -7977.388 | -7977.379 | 0.009  | 3.90E-06 |
| 11 | 119510366 | rs4438048   | T | C |  | 0.92  | -7977.388 | -7977.381 | 0.008  | 3.90E-06 |
| 11 | 119984598 | rs76031864  | A | G |  | 1.108 | -7977.388 | -7977.382 | 0.007  | 3.90E-06 |
| 11 | 118749318 | rs78312641  | A | T |  | 1.08  | -7977.388 | -7977.382 | 0.006  | 3.89E-06 |
| 11 | 116409433 | rs17491510  | T | C |  | 1.074 | -7977.388 | -7977.384 | 0.005  | 3.89E-06 |
| 11 | 116864639 | rs76665318  | C | T |  | 1.113 | -7977.388 | -7977.383 | 0.005  | 3.89E-06 |
| 11 | 119813686 | rs76661054  | C | T |  | 1.098 | -7977.388 | -7977.384 | 0.005  | 3.89E-06 |
| 11 | 119813733 | rs75224487  | T | C |  | 1.098 | -7977.388 | -7977.384 | 0.005  | 3.89E-06 |
| 11 | 119814337 | rs111902338 | A | C |  | 1.098 | -7977.388 | -7977.384 | 0.005  | 3.89E-06 |
| 11 | 119512641 | rs2089647   | G | A |  | 0.921 | -7977.388 | -7977.384 | 0.004  | 3.88E-06 |
| 11 | 120413702 | rs75510322  | C | A |  | 0.905 | -7977.388 | -7977.384 | 0.004  | 3.88E-06 |
| 11 | 116294664 | rs471750    | G | A |  | 0.927 | -7977.388 | -7977.385 | 0.003  | 3.88E-06 |
| 11 | 117338330 | rs495171    | C | T |  | 1.108 | -7977.388 | -7977.387 | 0.002  | 3.88E-06 |
| 11 | 119934934 | rs4938763   | T | C |  | 0.942 | -7977.388 | -7977.387 | 0.001  | 3.87E-06 |
| 11 | 116980679 | rs114221654 | T | C |  | 1.098 | -7977.388 | -7977.389 | 0      | 3.87E-06 |
| 11 | 116981515 | rs116770907 | T | C |  | 1.098 | -7977.388 | -7977.389 | 0      | 3.87E-06 |
| 11 | 116539058 | rs112464350 | A | C |  | 0.903 | -7977.388 | -7977.39  | -0.002 | 3.86E-06 |
| 11 | 117414714 | rs3802879   | T | G |  | 1.065 | -7977.388 | -7977.39  | -0.002 | 3.86E-06 |
| 11 | 117587224 | rs56153022  | G | C |  | 0.886 | -7977.388 | -7977.392 | -0.004 | 3.85E-06 |
| 11 | 118807637 | rs112974653 | T | G |  | 1.081 | -7977.388 | -7977.392 | -0.004 | 3.85E-06 |
| 11 | 119807543 | rs79710878  | G | A |  | 1.098 | -7977.388 | -7977.392 | -0.004 | 3.85E-06 |
| 11 | 119808101 | rs77763933  | C | G |  | 1.098 | -7977.388 | -7977.392 | -0.004 | 3.85E-06 |
| 11 | 116996631 | rs12419454  | T | C |  | 1.098 | -7977.388 | -7977.395 | -0.007 | 3.84E-06 |
| 11 | 116996783 | rs12416691  | T | A |  | 1.098 | -7977.388 | -7977.395 | -0.007 | 3.84E-06 |
| 11 | 117391421 | rs77964702  | A | G |  | 0.896 | -7977.388 | -7977.396 | -0.008 | 3.84E-06 |
| 11 | 116953338 | rs79552834  | C | G |  | 1.112 | -7977.388 | -7977.397 | -0.009 | 3.83E-06 |
| 11 | 119675931 | rs7926586   | G | T |  | 0.938 | -7977.388 | -7977.397 | -0.009 | 3.83E-06 |
| 11 | 116692552 | rs5103      | G | A |  | 1.109 | -7977.388 | -7977.399 | -0.01  | 3.83E-06 |
| 11 | 116996345 | rs17120344  | A | G |  | 1.097 | -7977.388 | -7977.398 | -0.01  | 3.83E-06 |
| 11 | 119510644 | rs7940667   | A | C |  | 0.921 | -7977.388 | -7977.398 | -0.01  | 3.83E-06 |
| 11 | 119512115 | rs2089646   | G | A |  | 0.921 | -7977.388 | -7977.399 | -0.01  | 3.83E-06 |
| 11 | 116530797 | rs558056    | T | G |  | 0.944 | -7977.388 | -7977.4   | -0.011 | 3.83E-06 |
| 11 | 119510303 | rs4245199   | G | T |  |       |           |           |        |          |

|    |           |              |   |   |      |             |        |         |
|----|-----------|--------------|---|---|------|-------------|--------|---------|
| 11 | 116404477 | rs77892802   | C | T | NULL | 0.507499438 | NULL&M | Disease |
| 11 | 120847817 | rs513548     | C | T | NULL | 0.507499438 | NULL&M | Disease |
| 11 | 117506565 | rs2155130    | C | T | NULL | 0.506249674 | NULL&M | Disease |
| 11 | 117574062 | rs7126179    | C | T | NULL | 0.506249674 | NULL&M | Disease |
| 11 | 119510937 | rs4938699    | C | G | NULL | 0.507499438 | NULL&M | Disease |
| 11 | 118091258 | rs77280285   | G | C | NULL | 0.507499438 | NULL&M | Disease |
| 11 | 116975084 | rs118155427  | C | G | NULL | 0.507499438 | NULL&M | Disease |
| 11 | 120441843 | rs11217918   | C | G | NULL | 0.507499438 | NULL&M | Disease |
| 11 | 120585311 | rs117839774  | T | C | NULL | 0.507499438 | NULL&M | Disease |
| 11 | 116708663 | rs12718466   | G | T | NULL | 0.507499438 | NULL&M | Disease |
| 11 | 117320430 | rs12418722   | T | C | NULL | 0.507499438 | NULL&M | Disease |
| 11 | 117885423 | rs77045391   | T | C | NULL | 0.507499438 | NULL&M | Disease |
| 11 | 117929672 | rs61900590   | T | C | NULL | 0.508749107 | NULL&M | Disease |
| 11 | 118809767 | rs75460330   | A | G | NULL | 0.508749107 | NULL&M | Disease |
| 11 | 118810054 | rs73557344   | C | G | NULL | 0.508749107 | NULL&M | Disease |
| 11 | 117529622 | rs621188     | C | T | NULL | 0.508749107 | NULL&M | Disease |
| 11 | 116970285 | rs73576687   | A | G | NULL | 0.507499438 | NULL&M | Disease |
| 11 | 119882187 | rs584620     | T | C | NULL | 0.508749107 | NULL&M | Disease |
| 11 | 116448341 | rs759988389  | C | T | NULL | 0.508749107 | NULL&M | Disease |
| 11 | 116968225 | rs73576682   | G | A | NULL | 0.507499438 | NULL&M | Disease |
| 11 | 116969416 | rs7939209    | C | T | NULL | 0.507499438 | NULL&M | Disease |
| 11 | 116969439 | rs7939303    | C | T | NULL | 0.507499438 | NULL&M | Disease |
| 11 | 117065050 | rs117634345  | A | G | NULL | 0.508749107 | NULL&M | Disease |
| 11 | 118749563 | rs77643000   | C | T | NULL | 0.508749107 | NULL&M | Disease |
| 11 | 116699389 | rs10790164   | A | G | NULL | 0.508749107 | NULL&M | Disease |
| 11 | 117793989 | rs11216625   | A | C | NULL | 0.508749107 | NULL&M | Disease |
| 11 | 120569866 | rs61901363   | T | C | NULL | 0.509998667 | NULL&M | Disease |
| 11 | 116991842 | rs59837440   | C | A | NULL | 0.508749107 | NULL&M | Disease |
| 11 | 117422642 | rs640147     | T | C | NULL | 0.509998667 | NULL&M | Disease |
| 11 | 118748789 | rs145762171  | A | G | NULL | 0.508749107 | NULL&M | Disease |
| 11 | 117535724 | rs10892154   | A | C | NULL | 0.509998667 | NULL&M | Disease |
| 11 | 118807740 | rs10892312   | A | G | NULL | 0.509998667 | NULL&M | Disease |
| 11 | 116225951 | rs117228135  | A | G | NULL | 0.508749107 | NULL&M | Disease |
| 11 | 117469122 | rs77973629   | T | G | NULL | 0.508749107 | NULL&M | Disease |
| 11 | 116706346 | rs5081       | T | A | NULL | 0.508749107 | NULL&M | Disease |
| 11 | 117335160 | rs111774429  | T | C | NULL | 0.508749107 | NULL&M | Disease |
| 11 | 117449742 | rs11602332   | A | G | NULL | 0.509998667 | NULL&M | Disease |
| 11 | 120853380 | rs2298723    | C | A | NULL | 0.509998667 | NULL&M | Disease |
| 11 | 117362948 | rs582285     | G | A | NULL | 0.509998667 | NULL&M | Disease |
| 11 | 117939413 | rs60348146   | A | G | NULL | 0.509998667 | NULL&M | Disease |
| 11 | 116233643 | rs572619     | T | A | NULL | 0.511248102 | NULL&M | Disease |
| 11 | 116998912 | rs145802214  | C | A | NULL | 0.509998667 | NULL&M | Disease |
| 11 | 116999025 | rs141250514  | C | T | NULL | 0.509998667 | NULL&M | Disease |
| 11 | 117392110 | rs35503235   | G | A | NULL | 0.509998667 | NULL&M | Disease |
| 11 | 117505239 | rs672251     | G | T | NULL | 0.511248102 | NULL&M | Disease |
| 11 | 116970006 | rs73576686   | A | T | NULL | 0.509998667 | NULL&M | Disease |
| 11 | 117354582 | rs10892123   | C | T | NULL | 0.511248102 | NULL&M | Disease |
| 11 | 117411223 | rs78853831   | T | C | NULL | 0.509998667 | NULL&M | Disease |
| 11 | 119715337 | rs73008653   | T | C | NULL | 0.511248102 | NULL&M | Disease |
| 11 | 120566375 | rs61902686   | C | T | NULL | 0.511248102 | NULL&M | Disease |
| 11 | 120566406 | rs61902687   | G | A | NULL | 0.511248102 | NULL&M | Disease |
| 11 | 116507206 | rs61567742   | T | C | NULL | 0.511248102 | NULL&M | Disease |
| 11 | 116688383 | rs2727790    | A | G | NULL | 0.511248102 | NULL&M | Disease |
| 11 | 117024256 | rs1352178661 | A | G | NULL | 0.511248102 | NULL&M | Disease |
| 11 | 117467582 | rs4938416    | T | C | NULL | 0.511248102 | NULL&M | Disease |
| 11 | 117467586 | rs4938417    | C | T | NULL | 0.511248102 | NULL&M | Disease |
| 11 | 118103976 | rs76675432   | T | C | NULL | 0.511248102 | NULL&M | Disease |
| 11 | 120849062 | rs4323878    | C | G | NULL | 0.512497396 | NULL&M | Disease |
| 11 | 116903316 | rs4548653    | A | G | NULL | 0.512497396 | NULL&M | Disease |
| 11 | 117592546 | rs4936400    | A | G | NULL | 0.511248102 | NULL&M | Disease |
| 11 | 120419218 | rs7940779    | T | C | NULL | 0.512497396 | NULL&M | Disease |
| 11 | 118441079 | rs7106316    | G | A | NULL | 0.512497396 | NULL&M | Disease |
| 11 | 116426640 | rs12289097   | G | A | NULL | 0.512497396 | NULL&M | Disease |
| 11 | 116533167 | rs509728     | C | G | NULL | 0.512497396 | NULL&M | Disease |
| 11 | 116547745 | rs59371082   | G | A | NULL | 0.512497396 | NULL&M | Disease |
| 11 | 116892626 | rs75949389   | G | A | NULL | 0.511248102 | NULL&M | Disease |
| 11 | 116999600 | rs138039720  | T | C | NULL | 0.512497396 | NULL&M | Disease |
| 11 | 117000179 | rs146067038  | G | A | NULL | 0.512497396 | NULL&M | Disease |
| 11 | 117001960 | rs12421425   | T | C | NULL | 0.512497396 | NULL&M | Disease |
| 11 | 117002828 | rs17120367   | T | C | NULL | 0.512497396 | NULL&M | Disease |
| 11 | 117003388 | rs17120370   | C | T | NULL | 0.512497396 | NULL&M | Disease |
| 11 | 117003418 | rs74735277   | T | C | NULL | 0.512497396 | NULL&M | Disease |
| 11 | 117003623 | rs75208249   | C | G | NULL | 0.512497396 | NULL&M | Disease |
| 11 | 117004201 | rs114945429  | T | G | NULL | 0.512497396 | NULL&M | Disease |
| 11 | 117004853 | rs12417098   | A | G | NULL | 0.512497396 | NULL&M | Disease |
| 11 | 117477761 | rs75582258   | G | A | NULL | 0.511248102 | NULL&M | Disease |
| 11 | 117795494 | rs78466564   | T | C | NULL | 0.512497396 | NULL&M | Disease |
| 11 | 120570595 | rs12293509   | T | C | NULL | 0.512497396 | NULL&M | Disease |
| 11 | 117162284 | rs45619137   | A | G | NULL | 0.512497396 | NULL&M | Disease |
| 11 | 118661197 | rs61901410   | G | C | NULL | 0.512497396 | NULL&M | Disease |
| 11 | 116707190 | rs5076       | A | G | NULL | 0.512497396 | NULL&M | Disease |
| 11 | 116708254 | rs5069       | A | G | NULL | 0.512497396 | NULL&M | Disease |
| 11 | 116976598 | rs116896104  | A | G | NULL | 0.512497396 | NULL&M | Disease |
| 11 | 117092808 | rs79697731   | G | C | NULL | 0.512497396 | NULL&M | Disease |
| 11 | 117794282 | rs11216626   | A | T | NULL | 0.512497396 | NULL&M | Disease |
| 11 | 117498605 | rs4936391    | G | A | NULL | 0.513746535 | NULL&M | Disease |
| 11 | 119879786 | rs1944512    | T | G | NULL | 0.513746535 | NULL&M | Disease |
| 11 | 116530251 | rs530053     | G | A | NULL | 0.513746535 | NULL&M | Disease |
| 11 | 119804461 | rs693701     | T | C | NULL | 0.513746535 | NULL&M | Disease |
| 11 | 116440521 | rs906541     | A | G | NULL | 0.513746535 | NULL&M | Disease |
| 11 | 116233857 | rs574529     | C | T | NULL | 0.513746535 | NULL&M | Disease |
| 11 | 116554088 | rs71480312   | T | C | NULL | 0.513746535 | NULL&M | Disease |
| 11 | 116897124 | rs57643685   | G | A | NULL | 0.512497396 | NULL&M | Disease |
| 11 | 118614115 | rs73001451   | C | T | NULL | 0.513746535 | NULL&M | Disease |
| 11 | 119959273 | rs7124732    | G | A | NULL | 0.512497396 | NULL&M | Disease |
| 11 | 119962800 | rs57877069   | C | G | NULL | 0.512497396 | NULL&M | Disease |

|    |           |             |   |   |       |           |           |       |          |
|----|-----------|-------------|---|---|-------|-----------|-----------|-------|----------|
| 11 | 116404477 | rs77892802  | C | T | 1.073 | -7977.388 | -7977.448 | -0.06 | 3.64E-06 |
| 11 | 120847817 | rs513548    | C | T | 0.939 | -7977.388 | -7977.449 | -0.06 | 3.64E-06 |
| 11 | 117506565 | rs2155130   | C | T | 0.894 | -7977.388 | -7977.449 | -0.06 | 3.64E-06 |
| 11 | 117574062 | rs7126179   | C | T | 0.892 | -7977.388 | -7977.451 | -0.06 | 3.63E-06 |
| 11 | 119510937 | rs4938699   | C | G | 0.922 | -7977.388 | -7977.451 | -0.06 | 3.63E-06 |
| 11 | 118091258 | rs77280285  | G | C | 0.895 | -7977.388 | -7977.453 | -0.06 | 3.62E-06 |
| 11 | 116975084 | rs118155427 | C | G | 0.894 | -7977.388 | -7977.455 | -0.06 | 3.62E-06 |
| 11 | 120441843 | rs11217918  | C | G | 1.119 | -7977.388 | -7977.456 | -0.06 | 3.62E-06 |
| 11 | 120585311 | rs117839774 | T | C | 0.9   | -7977.388 | -7977.457 | -0.06 | 3.61E-06 |
| 11 | 116708663 | rs12718466  | G | T | 1.108 | -7977.388 | -7977.458 | -0.06 | 3.61E-06 |
| 11 | 117320430 | rs12418722  | T | C | 0.916 | -7977.388 | -7977.457 | -0.06 | 3.61E-06 |
| 11 | 117885423 | rs77045391  | T | C | 0.897 | -7977.388 | -7977.457 | -0.06 | 3.61E-06 |
| 11 | 117929672 | rs61900590  | T | C | 0.944 | -7977.388 | -7977.458 | -0.07 | 3.61E-06 |
| 11 | 118809767 | rs75460330  | A | G | 0.914 | -7977.388 | -7977.459 | -0.07 | 3.61E-06 |
| 11 | 118810054 | rs73557344  | C | G | 0.914 | -7977.388 | -7977.459 | -0.07 | 3.61E-06 |
| 11 | 117529622 | rs621188    | C | T | 0.945 | -7977.388 | -7977.459 | -0.07 | 3.60E-06 |
| 11 | 116970285 | rs73576687  | A | G | 0.895 | -7977.388 | -7977.461 | -0.07 | 3.60E-06 |
| 11 | 119882187 | rs584620    | T | C | 0.927 | -7977.388 | -7977.461 | -0.07 | 3.60E-06 |
| 11 | 116448341 | rs759988389 | C | T | 1.071 | -7977.388 | -7977.462 | -0.07 | 3.59E-06 |
| 11 | 116968225 | rs73576682  | G | A | 0.895 | -7977.388 | -7977.462 | -0.07 | 3.59E-06 |
| 11 | 116969416 | rs7939209   | C | T | 0.895 | -7977.388 | -7977.462 | -0.07 | 3.59E-06 |
| 11 | 116969439 | rs7939303   | C | T | 0.895 | -7977.388 | -7977.462 | -0.07 | 3.59E-06 |
| 11 | 117065050 | rs117634345 | A | G | 1.107 | -7977.388 | -7977.462 | -0.07 | 3.59E-06 |
| 11 | 118749563 | rs77643000  | C | T | 1.077 | -7977.388 | -7977.463 | -0.07 | 3.59E-06 |
| 11 | 116699389 | rs10790164  | A | G | 0.904 | -7977.388 | -7977.466 | -0.07 | 3.58E-06 |
| 11 | 117793989 | rs11216625  | A | C | 0.907 | -7977.388 | -7977.466 | -0.07 | 3.58E-06 |
| 11 | 120569866 | rs61901363  | T | C | 0.926 | -7977.388 | -7977.468 | -0.07 | 3.57E-06 |
| 11 | 116991842 | rs59837440  | C | A | 1.107 | -7977.388 | -7977.469 | -0.08 | 3.57E-06 |
| 11 | 117422642 | rs640147    | T | C | 1.06  | -7977.388 | -7977.468 | -0.08 | 3.57E-06 |
| 11 | 118748789 | rs145762171 | A | G | 0.893 | -7977.388 | -7977.468 | -0.08 | 3.57E-06 |
| 11 | 117535724 | rs10892154  | A | C | 0.945 | -7977.388 | -7977.469 | -0.08 | 3.57E-06 |
| 11 | 118807740 | rs10892312  | A | G | 1.079 | -7977.388 | -7977.469 | -0.08 | 3.57E-06 |
| 11 | 116225951 | rs117228135 | A | G | 1.108 | -7977.388 | -7977.471 | -0.08 | 3.56E-06 |
| 11 | 117469122 | rs77973629  | T | G | 0.895 | -7977.388 | -7977.472 | -0.08 | 3.56E-06 |
| 11 | 116706346 | rs5081      | T | A | 0.896 | -7977.388 | -7977.472 | -0.08 | 3.56E-06 |
| 11 | 117335160 | rs111774429 | T | C | 0.893 | -7977.388 | -7977.473 | -0.08 | 3.55E-06 |
| 11 | 117449742 | rs11602332  | A | G | 1.06  | -7977.388 | -7977.474 | -0.08 | 3.55E-06 |
| 11 | 120853380 |             |   |   |       |           |           |       |          |

|    |           |             |   |   |      |             |        |         |
|----|-----------|-------------|---|---|------|-------------|--------|---------|
| 11 | 117076336 | rs78301905  | C | T | NULL | 0.513746535 | NULL&M | Disease |
| 11 | 117083948 | rs79997323  | G | A | NULL | 0.513746535 | NULL&M | Disease |
| 11 | 117084410 | rs79278568  | A | G | NULL | 0.513746535 | NULL&M | Disease |
| 11 | 117430479 | rs10892137  | T | C | NULL | 0.513746535 | NULL&M | Disease |
| 11 | 118500963 | rs680465    | A | G | NULL | 0.513746535 | NULL&M | Disease |
| 11 | 117421824 | rs542322    | A | G | NULL | 0.513746535 | NULL&M | Disease |
| 11 | 116424533 | rs75212830  | A | G | NULL | 0.513746535 | NULL&M | Disease |
| 11 | 116687156 | rs139385687 | C | G | NULL | 0.513746535 | NULL&M | Disease |
| 11 | 116904176 | rs142693807 | A | G | NULL | 0.513746535 | NULL&M | Disease |
| 11 | 116869560 | rs12574810  | G | A | NULL | 0.513746535 | NULL&M | Disease |
| 11 | 117528376 | rs671553    | T | C | NULL | 0.514995502 | NULL&M | Disease |
| 11 | 117470412 | rs78136547  | G | C | NULL | 0.513746535 | NULL&M | Disease |
| 11 | 117472019 | rs4938418   | C | T | NULL | 0.513746535 | NULL&M | Disease |
| 11 | 120577241 | rs61901378  | A | G | NULL | 0.514995502 | NULL&M | Disease |
| 11 | 116706343 | rs12718463  | C | T | NULL | 0.513746535 | NULL&M | Disease |
| 11 | 117560822 | rs11827260  | C | G | NULL | 0.514995502 | NULL&M | Disease |
| 11 | 118622744 | rs6589689   | G | A | NULL | 0.513746535 | NULL&M | Disease |
| 11 | 119882789 | rs587308    | T | C | NULL | 0.514995502 | NULL&M | Disease |
| 11 | 116696681 | rs7123326   | A | G | NULL | 0.513746535 | NULL&M | Disease |
| 11 | 117472684 | rs145533092 | A | G | NULL | 0.513746535 | NULL&M | Disease |
| 11 | 116698665 | rs7101528   | A | G | NULL | 0.514995502 | NULL&M | Disease |
| 11 | 116613464 | rs151220469 | A | G | NULL | 0.513746535 | NULL&M | Disease |
| 11 | 118808140 | rs7117408   | T | C | NULL | 0.514995502 | NULL&M | Disease |
| 11 | 117347947 | rs1574433   | T | C | NULL | 0.514995502 | NULL&M | Disease |
| 11 | 119324831 | rs118101513 | A | C | NULL | 0.514995502 | NULL&M | Disease |
| 11 | 117041911 | rs75525407  | T | C | NULL | 0.514995502 | NULL&M | Disease |
| 11 | 117052757 | rs189196849 | T | G | NULL | 0.514995502 | NULL&M | Disease |
| 11 | 117054029 | rs59978576  | G | C | NULL | 0.514995502 | NULL&M | Disease |
| 11 | 117055400 | rs61268522  | C | A | NULL | 0.514995502 | NULL&M | Disease |
| 11 | 117055893 | rs140727315 | C | G | NULL | 0.514995502 | NULL&M | Disease |
| 11 | 117061994 | rs184936191 | T | A | NULL | 0.514995502 | NULL&M | Disease |
| 11 | 117065271 | rs79043792  | C | G | NULL | 0.514995502 | NULL&M | Disease |
| 11 | 117072970 | rs74967901  | A | G | NULL | 0.514995502 | NULL&M | Disease |
| 11 | 116987421 | rs56756054  | C | T | NULL | 0.514995502 | NULL&M | Disease |
| 11 | 119879579 | rs1944495   | T | C | NULL | 0.516244281 | NULL&M | Disease |
| 11 | 116730833 | rs545274    | T | C | NULL | 0.516244281 | NULL&M | Disease |
| 11 | 117356858 | rs606727    | G | C | NULL | 0.516244281 | NULL&M | Disease |
| 11 | 116223780 | rs17475326  | T | A | NULL | 0.514995502 | NULL&M | Disease |
| 11 | 116754753 | rs57259536  | T | A | NULL | 0.514995502 | NULL&M | Disease |
| 11 | 116882563 | rs73594141  | T | C | NULL | 0.514995502 | NULL&M | Disease |
| 11 | 116896441 | rs73594158  | T | C | NULL | 0.514995502 | NULL&M | Disease |
| 11 | 116896811 | rs73594162  | T | C | NULL | 0.514995502 | NULL&M | Disease |
| 11 | 116897613 | rs73594164  | G | T | NULL | 0.514995502 | NULL&M | Disease |
| 11 | 116900956 | rs59647391  | G | A | NULL | 0.514995502 | NULL&M | Disease |
| 11 | 116902631 | rs73594172  | T | A | NULL | 0.514995502 | NULL&M | Disease |
| 11 | 117473537 | rs77346448  | C | T | NULL | 0.514995502 | NULL&M | Disease |
| 11 | 117795537 | rs79136224  | T | C | NULL | 0.516244281 | NULL&M | Disease |
| 11 | 120841689 | rs652418    | C | T | NULL | 0.516244281 | NULL&M | Disease |
| 11 | 121189231 | rs10892721  | T | G | NULL | 0.516244281 | NULL&M | Disease |
| 11 | 120644115 | rs7938295   | A | G | NULL | 0.516244281 | NULL&M | Disease |
| 11 | 117099025 | rs2306474   | G | A | NULL | 0.516244281 | NULL&M | Disease |
| 11 | 119936292 | rs640663    | A | G | NULL | 0.516244281 | NULL&M | Disease |
| 11 | 117563295 | rs11216505  | A | G | NULL | 0.516244281 | NULL&M | Disease |
| 11 | 117579111 | rs17121102  | C | G | NULL | 0.516244281 | NULL&M | Disease |
| 11 | 118754649 | rs10892307  | G | C | NULL | 0.516244281 | NULL&M | Disease |
| 11 | 120569843 | rs61901362  | C | T | NULL | 0.516244281 | NULL&M | Disease |
| 11 | 118241516 | rs11216861  | A | G | NULL | 0.517492858 | NULL&M | Disease |
| 11 | 117430058 | rs510250    | G | T | NULL | 0.517492858 | NULL&M | Disease |
| 11 | 118865992 | rs11217117  | T | C | NULL | 0.517492858 | NULL&M | Disease |
| 11 | 120838716 | rs608154    | G | A | NULL | 0.517492858 | NULL&M | Disease |
| 11 | 117034320 | rs150881386 | T | C | NULL | 0.516244281 | NULL&M | Disease |
| 11 | 117035622 | rs144762883 | T | C | NULL | 0.516244281 | NULL&M | Disease |
| 11 | 117039208 | rs117842423 | A | G | NULL | 0.516244281 | NULL&M | Disease |
| 11 | 117061937 | rs117303996 | A | G | NULL | 0.516244281 | NULL&M | Disease |
| 11 | 117795373 | rs78264252  | A | C | NULL | 0.517492858 | NULL&M | Disease |
| 11 | 116734545 | rs11216164  | A | G | NULL | 0.517492858 | NULL&M | Disease |
| 11 | 118807876 | rs12282154  | A | G | NULL | 0.517492858 | NULL&M | Disease |
| 11 | 120571883 | rs61901370  | T | C | NULL | 0.517492858 | NULL&M | Disease |
| 11 | 117053686 | rs61562228  | A | G | NULL | 0.516244281 | NULL&M | Disease |
| 11 | 117794650 | rs11216629  | G | C | NULL | 0.517492858 | NULL&M | Disease |
| 11 | 119733857 | rs570521    | G | T | NULL | 0.517492858 | NULL&M | Disease |
| 11 | 117004023 | rs150672190 | T | C | NULL | 0.517492858 | NULL&M | Disease |
| 11 | 117005207 | rs117146251 | G | A | NULL | 0.517492858 | NULL&M | Disease |
| 11 | 119352350 | rs61901289  | T | G | NULL | 0.517492858 | NULL&M | Disease |
| 11 | 116680961 | rs80220270  | C | A | NULL | 0.517492858 | NULL&M | Disease |
| 11 | 116929666 | rs73576612  | C | T | NULL | 0.517492858 | NULL&M | Disease |
| 11 | 116932615 | rs17120265  | G | C | NULL | 0.517492858 | NULL&M | Disease |
| 11 | 116935363 | rs17120271  | G | C | NULL | 0.517492858 | NULL&M | Disease |
| 11 | 116939071 | rs17120275  | C | T | NULL | 0.517492858 | NULL&M | Disease |
| 11 | 118856491 | rs3889526   | A | C | NULL | 0.517492858 | NULL&M | Disease |
| 11 | 118857466 | rs4938610   | C | T | NULL | 0.517492858 | NULL&M | Disease |
| 11 | 119663944 | rs73006788  | T | C | NULL | 0.517492858 | NULL&M | Disease |
| 11 | 117344165 | rs11216413  | A | T | NULL | 0.518741216 | NULL&M | Disease |
| 11 | 117795082 | rs76046563  | G | C | NULL | 0.517492858 | NULL&M | Disease |
| 11 | 117346121 | rs74594162  | G | C | NULL | 0.517492858 | NULL&M | Disease |
| 11 | 117349482 | rs12277788  | T | C | NULL | 0.518741216 | NULL&M | Disease |
| 11 | 117709760 | rs11216576  | A | G | NULL | 0.518741216 | NULL&M | Disease |
| 11 | 119324268 | rs78040959  | G | A | NULL | 0.518741216 | NULL&M | Disease |
| 11 | 116963969 | rs79536557  | G | A | NULL | 0.517492858 | NULL&M | Disease |
| 11 | 118287568 | rs75461585  | G | A | NULL | 0.517492858 | NULL&M | Disease |
| 11 | 120643090 | rs7934092   | A | C | NULL | 0.517492858 | NULL&M | Disease |
| 11 | 117246876 | rs2305827   | C | T | NULL | 0.518741216 | NULL&M | Disease |
| 11 | 117475763 | rs77492882  | T | C | NULL | 0.517492858 | NULL&M | Disease |
| 11 | 117475976 | rs79198917  | A | G | NULL | 0.517492858 | NULL&M | Disease |
| 11 | 116910971 | rs12273536  | T | C | NULL | 0.518741216 | NULL&M | Disease |
| 11 | 117574296 | rs2068412   | G | A | NULL | 0.517492858 | NULL&M | Disease |

|    |           |             |   |   |       |           |           |        |          |
|----|-----------|-------------|---|---|-------|-----------|-----------|--------|----------|
| 11 | 117076336 | rs78301905  | C | T | 1.105 | -7977.388 | -7977.502 | -0.114 | 3.45E-06 |
| 11 | 117083948 | rs79997323  | G | A | 1.105 | -7977.388 | -7977.502 | -0.114 | 3.45E-06 |
| 11 | 117084410 | rs79278568  | A | G | 1.105 | -7977.388 | -7977.502 | -0.114 | 3.45E-06 |
| 11 | 117430479 | rs10892137  | T | C | 0.945 | -7977.388 | -7977.502 | -0.114 | 3.45E-06 |
| 11 | 118500963 | rs680465    | A | G | 0.938 | -7977.388 | -7977.502 | -0.114 | 3.45E-06 |
| 11 | 117421824 | rs542322    | A | G | 1.06  | -7977.388 | -7977.503 | -0.115 | 3.45E-06 |
| 11 | 116424533 | rs75212830  | A | G | 1.071 | -7977.388 | -7977.504 | -0.116 | 3.44E-06 |
| 11 | 116687156 | rs139385687 | C | G | 1.103 | -7977.388 | -7977.504 | -0.116 | 3.44E-06 |
| 11 | 116904176 | rs142693807 | A | G | 0.898 | -7977.388 | -7977.505 | -0.117 | 3.44E-06 |
| 11 | 116869560 | rs12574810  | G | A | 1.107 | -7977.388 | -7977.506 | -0.118 | 3.44E-06 |
| 11 | 117528376 | rs671553    | T | C | 0.945 | -7977.388 | -7977.506 | -0.118 | 3.44E-06 |
| 11 | 117470412 | rs78136547  | G | C | 0.898 | -7977.388 | -7977.508 | -0.119 | 3.43E-06 |
| 11 | 117472019 | rs4938418   | C | T | 0.898 | -7977.388 | -7977.508 | -0.119 | 3.43E-06 |
| 11 | 120577241 | rs61901378  | A | G | 0.927 | -7977.388 | -7977.508 | -0.12  | 3.43E-06 |
| 11 | 116706343 | rs12718463  | C | T | 1.104 | -7977.388 | -7977.51  | -0.121 | 3.43E-06 |
| 11 | 117560822 | rs11827260  | C | G | 0.933 | -7977.388 | -7977.509 | -0.121 | 3.43E-06 |
| 11 | 118622744 | rs6589689   | G | A | 0.897 | -7977.388 | -7977.509 | -0.121 | 3.43E-06 |
| 11 | 119882789 | rs587308    | T | C | 0.928 | -7977.388 | -7977.51  | -0.121 | 3.43E-06 |
| 11 | 116696681 | rs7123326   | A | G | 1.103 | -7977.388 | -7977.511 | -0.122 | 3.42E-06 |
| 11 | 117472684 | rs145533092 | A | G | 0.898 | -7977.388 | -7977.51  | -0.122 | 3.42E-06 |
| 11 | 116698665 | rs7101528   | A | G | 1.102 | -7977.388 | -7977.512 | -0.124 | 3.42E-06 |
| 11 | 116613464 | rs151220469 | A | G | 1.113 | -7977.388 | -7977.513 | -0.125 | 3.41E-06 |
| 11 | 118808140 | rs7117408   | T | C | 1.077 | -7977.388 | -7977.514 | -0.125 | 3.41E-06 |
| 11 | 117347947 | rs1574433   | T | C | 1.066 | -7977.388 | -7977.515 | -0.127 | 3.41E-06 |
| 11 | 119324831 | rs118101513 | A | C | 0.898 | -7977.388 | -7977.515 | -0.127 | 3.41E-06 |
| 11 | 117041911 | rs75525407  | T | C | 1.104 | -7977.388 | -7977.516 | -0.128 | 3.40E-06 |
| 11 | 117052757 | rs189196849 | T | G | 1.104 | -7977.388 | -7977.516 | -0.128 | 3.40E-06 |
| 11 | 117054029 | rs59978576  | G | C | 1.104 | -7977.388 | -7977.516 | -0.128 | 3.40E-06 |
| 11 | 117055400 | rs61268522  | C | A | 1.104 | -7977.388 | -7977.516 | -0.128 | 3.40E-06 |
| 11 | 117055893 | rs140727315 | C | G | 1.104 | -7977.388 | -7977.516 | -0.128 | 3.40E-06 |
| 11 | 117061994 | rs184936191 | T | A | 1.104 | -7977.388 | -7977.516 | -0.128 | 3.40E-06 |
| 11 | 117065271 | rs79043792  | C | G | 1.104 | -7977.388 | -7977.516 | -0.128 | 3.40E-06 |
| 11 | 117072970 | rs74967901  | A | G | 1.104 | -7977.388 | -7977.516 | -0.128 | 3.40E-06 |
| 11 | 116987421 | rs56756054  | C | T | 1.104 | -7977.388 | -7977.518 | -0.129 | 3.40E-06 |
| 11 | 119879579 | rs1944495   | T | C | 1.078 | -7977.388 | -7977.517 | -0.129 | 3.40E-06 |
| 11 | 116730833 | rs545274    | T | C | 1.065 | -7977.388 | -7977.519 | -0.13  | 3.40E-06 |
| 11 | 117356858 | rs606727    | G | C | 0.927 | -7977.388 | -7977.52  |        |          |

|    |           |              |   |   |      |             |        |         |
|----|-----------|--------------|---|---|------|-------------|--------|---------|
| 11 | 117794735 | rs11216630   | T | A | NULL | 0.518741216 | NULL&M | Disease |
| 11 | 117795397 | rs77637745   | A | C | NULL | 0.518741216 | NULL&M | Disease |
| 11 | 120797878 | rs11218060   | T | C | NULL | 0.518741216 | NULL&M | Disease |
| 11 | 117030187 | rs75115775   | C | A | NULL | 0.518741216 | NULL&M | Disease |
| 11 | 117032934 | rs59007408   | T | C | NULL | 0.518741216 | NULL&M | Disease |
| 11 | 117329289 | rs113968937  | G | C | NULL | 0.518741216 | NULL&M | Disease |
| 11 | 117055485 | rs57315752   | G | A | NULL | 0.518741216 | NULL&M | Disease |
| 11 | 116987767 | rs60215110   | A | G | NULL | 0.518741216 | NULL&M | Disease |
| 11 | 116989133 | rs186927602  | A | G | NULL | 0.518741216 | NULL&M | Disease |
| 11 | 116990523 | rs118143963  | T | A | NULL | 0.518741216 | NULL&M | Disease |
| 11 | 116992739 | rs79117087   | C | A | NULL | 0.518741216 | NULL&M | Disease |
| 11 | 116993291 | rs117140575  | C | T | NULL | 0.518741216 | NULL&M | Disease |
| 11 | 116999303 | rs59225422   | G | C | NULL | 0.518741216 | NULL&M | Disease |
| 11 | 117000117 | rs142742415  | A | G | NULL | 0.518741216 | NULL&M | Disease |
| 11 | 117001875 | rs77983828   | C | T | NULL | 0.518741216 | NULL&M | Disease |
| 11 | 117564891 | rs12285200   | G | A | NULL | 0.518741216 | NULL&M | Disease |
| 11 | 120577413 | rs12270261   | T | C | NULL | 0.518741216 | NULL&M | Disease |
| 11 | 116980147 | rs79777938   | C | G | NULL | 0.518741216 | NULL&M | Disease |
| 11 | 116782000 | rs12808437   | T | G | NULL | 0.51998934  | NULL&M | Disease |
| 11 | 117335035 | rs116941106  | A | G | NULL | 0.518741216 | NULL&M | Disease |
| 11 | 117696521 | rs118176355  | C | G | NULL | 0.518741216 | NULL&M | Disease |
| 11 | 116854683 | rs147507811  | A | C | NULL | 0.518741216 | NULL&M | Disease |
| 11 | 116955831 | rs77564847   | C | T | NULL | 0.518741216 | NULL&M | Disease |
| 11 | 117084070 | rs76553074   | C | T | NULL | 0.51998934  | NULL&M | Disease |
| 11 | 117496475 | rs10790196   | T | C | NULL | 0.51998934  | NULL&M | Disease |
| 11 | 119816512 | rs668781     | C | T | NULL | 0.51998934  | NULL&M | Disease |
| 11 | 117420356 | rs609353     | T | C | NULL | 0.51998934  | NULL&M | Disease |
| 11 | 117498314 | rs4936390    | A | G | NULL | 0.518741216 | NULL&M | Disease |
| 11 | 117498656 | rs4936392    | T | G | NULL | 0.518741216 | NULL&M | Disease |
| 11 | 117499830 | rs78696556   | C | T | NULL | 0.518741216 | NULL&M | Disease |
| 11 | 118072648 | rs78270838   | G | A | NULL | 0.51998934  | NULL&M | Disease |
| 11 | 117032641 | rs60928822   | C | T | NULL | 0.51998934  | NULL&M | Disease |
| 11 | 117795232 | rs80085590   | A | G | NULL | 0.51998934  | NULL&M | Disease |
| 11 | 117017839 | rs145384144  | C | G | NULL | 0.51998934  | NULL&M | Disease |
| 11 | 117408077 | rs557053     | T | C | NULL | 0.521237215 | NULL&M | Disease |
| 11 | 117581866 | rs17121106   | C | T | NULL | 0.51998934  | NULL&M | Disease |
| 11 | 117903942 | rs11216713   | A | G | NULL | 0.51998934  | NULL&M | Disease |
| 11 | 120459320 | rs4936521    | G | A | NULL | 0.521237215 | NULL&M | Disease |
| 11 | 116866609 | rs73594128   | C | T | NULL | 0.51998934  | NULL&M | Disease |
| 11 | 116869827 | rs10502223   | C | T | NULL | 0.51998934  | NULL&M | Disease |
| 11 | 116954760 | rs80137897   | C | T | NULL | 0.51998934  | NULL&M | Disease |
| 11 | 120590901 | rs61901400   | A | G | NULL | 0.521237215 | NULL&M | Disease |
| 11 | 119756941 | rs11217554   | C | G | NULL | 0.521237215 | NULL&M | Disease |
| 11 | 119938994 | rs591596     | A | G | NULL | 0.521237215 | NULL&M | Disease |
| 11 | 120624525 | rs2156763    | G | A | NULL | 0.51998934  | NULL&M | Disease |
| 11 | 117346653 | rs78064538   | C | G | NULL | 0.51998934  | NULL&M | Disease |
| 11 | 120450358 | rs12273031   | A | G | NULL | 0.51998934  | NULL&M | Disease |
| 11 | 116978627 | rs116943892  | G | A | NULL | 0.521237215 | NULL&M | Disease |
| 11 | 117584155 | rs79876834   | T | C | NULL | 0.51998934  | NULL&M | Disease |
| 11 | 120700147 | rs6589846    | G | T | NULL | 0.521237215 | NULL&M | Disease |
| 11 | 116908457 | rs7118591    | A | C | NULL | 0.521237215 | NULL&M | Disease |
| 11 | 117082109 | rs12417682   | A | G | NULL | 0.521237215 | NULL&M | Disease |
| 11 | 120569884 | rs61901364   | T | C | NULL | 0.521237215 | NULL&M | Disease |
| 11 | 120570198 | rs12278795   | G | A | NULL | 0.521237215 | NULL&M | Disease |
| 11 | 116823972 | rs186331126  | G | T | NULL | 0.51998934  | NULL&M | Disease |
| 11 | 117960822 | rs117083922  | A | G | NULL | 0.521237215 | NULL&M | Disease |
| 11 | 116220390 | rs76406762   | A | C | NULL | 0.521237215 | NULL&M | Disease |
| 11 | 116283172 | rs488485     | T | C | NULL | 0.522484825 | NULL&M | Disease |
| 11 | 116528047 | rs1482502236 | A | T | NULL | 0.521237215 | NULL&M | Disease |
| 11 | 116737093 | rs548638     | G | T | NULL | 0.522484825 | NULL&M | Disease |
| 11 | 117496666 | rs117870205  | A | G | NULL | 0.521237215 | NULL&M | Disease |
| 11 | 117496750 | rs147793723  | C | T | NULL | 0.521237215 | NULL&M | Disease |
| 11 | 117497996 | rs74681797   | T | C | NULL | 0.521237215 | NULL&M | Disease |
| 11 | 117498920 | rs117041834  | A | T | NULL | 0.521237215 | NULL&M | Disease |
| 11 | 117499828 | rs76205818   | A | T | NULL | 0.521237215 | NULL&M | Disease |
| 11 | 120735646 | rs74651412   | A | G | NULL | 0.522484825 | NULL&M | Disease |
| 11 | 116906728 | rs4938327    | C | T | NULL | 0.522484825 | NULL&M | Disease |
| 11 | 116907043 | rs3181       | A | G | NULL | 0.522484825 | NULL&M | Disease |
| 11 | 117707191 | rs10790214   | T | C | NULL | 0.522484825 | NULL&M | Disease |
| 11 | 120568090 | rs12295200   | C | T | NULL | 0.522484825 | NULL&M | Disease |
| 11 | 120568153 | rs12288261   | T | C | NULL | 0.522484825 | NULL&M | Disease |
| 11 | 120568248 | rs118056960  | T | C | NULL | 0.522484825 | NULL&M | Disease |
| 11 | 120568318 | rs78634274   | C | T | NULL | 0.522484825 | NULL&M | Disease |
| 11 | 120568790 | rs61901360   | T | C | NULL | 0.522484825 | NULL&M | Disease |
| 11 | 116815769 | rs649084     | A | G | NULL | 0.521237215 | NULL&M | Disease |
| 11 | 116817785 | rs113712143  | A | G | NULL | 0.521237215 | NULL&M | Disease |
| 11 | 116854580 | rs2441218    | G | T | NULL | 0.521237215 | NULL&M | Disease |
| 11 | 116856179 | rs537431     | C | T | NULL | 0.521237215 | NULL&M | Disease |
| 11 | 116857400 | rs569568     | C | T | NULL | 0.521237215 | NULL&M | Disease |
| 11 | 116860456 | rs638392     | A | T | NULL | 0.521237215 | NULL&M | Disease |
| 11 | 116861519 | rs623423     | C | G | NULL | 0.521237215 | NULL&M | Disease |
| 11 | 116862087 | rs560897     | T | C | NULL | 0.521237215 | NULL&M | Disease |
| 11 | 116862718 | rs607756     | C | T | NULL | 0.521237215 | NULL&M | Disease |
| 11 | 116886096 | rs7119185    | T | C | NULL | 0.522484825 | NULL&M | Disease |
| 11 | 117341574 | rs79865588   | C | T | NULL | 0.521237215 | NULL&M | Disease |
| 11 | 117815564 | rs2512139    | A | G | NULL | 0.522484825 | NULL&M | Disease |
| 11 | 116693213 | rs5094       | A | G | NULL | 0.521237215 | NULL&M | Disease |
| 11 | 120570080 | rs12291927   | G | C | NULL | 0.522484825 | NULL&M | Disease |
| 11 | 120571553 | rs61901368   | G | A | NULL | 0.522484825 | NULL&M | Disease |
| 11 | 116722041 | rs10047462   | G | T | NULL | 0.522484825 | NULL&M | Disease |
| 11 | 119677072 | rs895648     | C | T | NULL | 0.522484825 | NULL&M | Disease |
| 11 | 116886516 | rs145133311  | T | C | NULL | 0.522484825 | NULL&M | Disease |
| 11 | 120570404 | rs12293393   | G | C | NULL | 0.522484825 | NULL&M | Disease |
| 11 | 120733435 | rs3901285    | T | C | NULL | 0.522484825 | NULL&M | Disease |
| 11 | 119797863 | rs542748     | C | G | NULL | 0.523732154 | NULL&M | Disease |
| 11 | 120627141 | rs1945009    | A | G | NULL | 0.522484825 | NULL&M | Disease |

|    |           |             |   |   |       |           |           |        |          |
|----|-----------|-------------|---|---|-------|-----------|-----------|--------|----------|
| 11 | 117794735 | rs11216630  | T | A | 0.911 | -7977.388 | -7977.543 | -0.155 | 3.31E-06 |
| 11 | 117795397 | rs77637745  | A | C | 0.911 | -7977.388 | -7977.544 | -0.155 | 3.31E-06 |
| 11 | 120797878 | rs11218060  | T | C | 0.931 | -7977.388 | -7977.543 | -0.155 | 3.31E-06 |
| 11 | 117030187 | rs75115775  | C | A | 1.102 | -7977.388 | -7977.544 | -0.156 | 3.31E-06 |
| 11 | 117032934 | rs59007408  | T | C | 1.102 | -7977.388 | -7977.544 | -0.156 | 3.31E-06 |
| 11 | 117329289 | rs113968937 | G | C | 1.105 | -7977.388 | -7977.544 | -0.156 | 3.31E-06 |
| 11 | 117055485 | rs57315752  | G | A | 1.102 | -7977.388 | -7977.546 | -0.157 | 3.31E-06 |
| 11 | 116987767 | rs60215110  | A | G | 1.102 | -7977.388 | -7977.547 | -0.158 | 3.30E-06 |
| 11 | 116989133 | rs186927602 | A | G | 1.102 | -7977.388 | -7977.547 | -0.158 | 3.30E-06 |
| 11 | 116990523 | rs118143963 | T | A | 1.102 | -7977.388 | -7977.547 | -0.158 | 3.30E-06 |
| 11 | 116992739 | rs79117087  | C | A | 1.102 | -7977.388 | -7977.547 | -0.158 | 3.30E-06 |
| 11 | 116993291 | rs117140575 | C | T | 1.102 | -7977.388 | -7977.547 | -0.158 | 3.30E-06 |
| 11 | 116999303 | rs59225422  | G | C | 1.102 | -7977.388 | -7977.547 | -0.158 | 3.30E-06 |
| 11 | 117000117 | rs142742415 | A | G | 1.102 | -7977.388 | -7977.547 | -0.158 | 3.30E-06 |
| 11 | 117001875 | rs77983828  | C | T | 1.102 | -7977.388 | -7977.547 | -0.158 | 3.30E-06 |
| 11 | 117564891 | rs12285200  | G | A | 0.926 | -7977.388 | -7977.546 | -0.158 | 3.30E-06 |
| 11 | 120577413 | rs12270261  | T | C | 0.928 | -7977.388 | -7977.546 | -0.158 | 3.30E-06 |
| 11 | 116980147 | rs79777938  | C | G | 1.102 | -7977.388 | -7977.547 | -0.159 | 3.30E-06 |
| 11 | 116782000 | rs12808437  | T | G | 1.064 | -7977.388 | -7977.55  | -0.161 | 3.29E-06 |
| 11 | 117335035 | rs116941106 | A | G | 1.109 | -7977.388 | -7977.549 | -0.161 | 3.29E-06 |
| 11 | 117696521 | rs118176355 | C | G | 0.9   | -7977.388 | -7977.549 | -0.161 | 3.29E-06 |
| 11 | 116854683 | rs147507811 | A | C | 0.904 | -7977.388 | -7977.55  | -0.162 | 3.29E-06 |
| 11 | 116955831 | rs77564847  | C | T | 0.901 | -7977.388 | -7977.551 | -0.163 | 3.29E-06 |
| 11 | 117084070 | rs76553074  | C | T | 1.101 | -7977.388 | -7977.552 | -0.163 | 3.29E-06 |
| 11 | 117496475 | rs10790196  | T | C | 0.942 | -7977.388 | -7977.551 | -0.163 | 3.29E-06 |
| 11 | 119816512 | rs668781    | C | T | 0.942 | -7977.388 | -7977.552 | -0.163 | 3.29E-06 |
| 11 | 117420356 | rs609353    | T | C | 1.059 | -7977.388 | -7977.552 | -0.164 | 3.28E-06 |
| 11 | 117498314 | rs4936390   | A | G | 0.902 | -7977.388 | -7977.552 | -0.164 | 3.28E-06 |
| 11 | 117498656 | rs4936392   | T | G | 0.902 | -7977.388 | -7977.552 | -0.164 | 3.28E-06 |
| 11 | 117499830 | rs78696556  | C | T | 0.902 | -7977.388 | -7977.552 | -0.164 | 3.28E-06 |
| 11 | 118072648 | rs78270838  | G | A | 0.906 | -7977.388 | -7977.552 | -0.164 | 3.28E-06 |
| 11 | 117032641 | rs60928822  | C | T | 1.101 | -7977.388 | -7977.553 | -0.165 | 3.28E-06 |
| 11 | 117795232 | rs80085590  | A | G | 0.911 | -7977.388 | -7977.555 | -0.166 | 3.28E-06 |
| 11 | 117017839 | rs145384144 | C | G | 1.096 | -7977.388 | -7977.556 | -0.168 | 3.27E-06 |
| 11 | 117408077 | rs557053    | T | C | 1.057 | -7977.388 | -7977.557 | -0.169 | 3.27E-06 |
| 11 | 117581866 | rs17121106  | C | T | 0.901 | -7977.388 | -7977.557 | -0.169 | 3.27E-06 |
| 11 | 117903942 | rs11216713  | A | G | 0.904 | -7977.388 | -7977.557 | -0.169 |          |

|    |           |              |   |   |      |             |        |         |
|----|-----------|--------------|---|---|------|-------------|--------|---------|
| 11 | 117672561 | rs10892173   | T | C | NULL | 0.523732154 | NULL&M | Disease |
| 11 | 116807970 | rs473172     | A | G | NULL | 0.523732154 | NULL&M | Disease |
| 11 | 117062158 | rs139685157  | A | G | NULL | 0.522484825 | NULL&M | Disease |
| 11 | 116710239 | rs632153     | T | G | NULL | 0.522484825 | NULL&M | Disease |
| 11 | 117795189 | rs75195166   | A | G | NULL | 0.523732154 | NULL&M | Disease |
| 11 | 120569355 | rs61901361   | G | A | NULL | 0.523732154 | NULL&M | Disease |
| 11 | 116678191 | rs61905133   | G | A | NULL | 0.523732154 | NULL&M | Disease |
| 11 | 117303108 | rs76347292   | C | T | NULL | 0.523732154 | NULL&M | Disease |
| 11 | 118852081 | rs4938606    | G | A | NULL | 0.523732154 | NULL&M | Disease |
| 11 | 118858878 | rs188758920  | A | C | NULL | 0.522484825 | NULL&M | Disease |
| 11 | 116271393 | rs191301146  | T | C | NULL | 0.522484825 | NULL&M | Disease |
| 11 | 117424005 | rs576390     | A | G | NULL | 0.523732154 | NULL&M | Disease |
| 11 | 118028648 | rs73014974   | T | C | NULL | 0.523732154 | NULL&M | Disease |
| 11 | 117904550 | rs11216714   | A | G | NULL | 0.523732154 | NULL&M | Disease |
| 11 | 117904710 | rs12223224   | T | C | NULL | 0.523732154 | NULL&M | Disease |
| 11 | 117904793 | rs12226036   | G | A | NULL | 0.523732154 | NULL&M | Disease |
| 11 | 117905217 | rs11216715   | T | A | NULL | 0.523732154 | NULL&M | Disease |
| 11 | 117905394 | rs11216716   | A | G | NULL | 0.523732154 | NULL&M | Disease |
| 11 | 117905495 | rs80001712   | T | C | NULL | 0.523732154 | NULL&M | Disease |
| 11 | 117905654 | rs12223683   | A | G | NULL | 0.523732154 | NULL&M | Disease |
| 11 | 117905786 | rs79075579   | T | C | NULL | 0.523732154 | NULL&M | Disease |
| 11 | 116598315 | rs141414463  | T | C | NULL | 0.523732154 | NULL&M | Disease |
| 11 | 116774447 | rs34144542   | G | A | NULL | 0.523732154 | NULL&M | Disease |
| 11 | 117032959 | rs12281009   | G | A | NULL | 0.523732154 | NULL&M | Disease |
| 11 | 117795283 | rs74391474   | C | G | NULL | 0.523732154 | NULL&M | Disease |
| 11 | 117795285 | rs74578710   | A | G | NULL | 0.523732154 | NULL&M | Disease |
| 11 | 116818187 | rs3133352    | A | G | NULL | 0.523732154 | NULL&M | Disease |
| 11 | 116819991 | rs1261706    | A | T | NULL | 0.523732154 | NULL&M | Disease |
| 11 | 116827565 | rs587703     | G | A | NULL | 0.523732154 | NULL&M | Disease |
| 11 | 116844279 | rs2513092    | C | T | NULL | 0.523732154 | NULL&M | Disease |
| 11 | 120456533 | rs11602493   | A | G | NULL | 0.524979187 | NULL&M | Disease |
| 11 | 117424306 | rs573648     | A | G | NULL | 0.524979187 | NULL&M | Disease |
| 11 | 116788699 | rs10750099   | A | C | NULL | 0.523732154 | NULL&M | Disease |
| 11 | 116789635 | rs6589579    | C | A | NULL | 0.523732154 | NULL&M | Disease |
| 11 | 117084396 | rs12418705   | T | C | NULL | 0.524979187 | NULL&M | Disease |
| 11 | 117495049 | rs6589616    | T | C | NULL | 0.524979187 | NULL&M | Disease |
| 11 | 117617379 | rs1893038    | C | T | NULL | 0.523732154 | NULL&M | Disease |
| 11 | 117495305 | rs77314777   | A | G | NULL | 0.523732154 | NULL&M | Disease |
| 11 | 117594443 | rs7123597    | A | C | NULL | 0.523732154 | NULL&M | Disease |
| 11 | 117161006 | rs17120560   | G | C | NULL | 0.524979187 | NULL&M | Disease |
| 11 | 117464712 | rs4938414    | A | G | NULL | 0.524979187 | NULL&M | Disease |
| 11 | 118899218 | rs4936459    | T | C | NULL | 0.524979187 | NULL&M | Disease |
| 11 | 120571314 | rs74447718   | T | C | NULL | 0.524979187 | NULL&M | Disease |
| 11 | 116660450 | rs33984246   | G | A | NULL | 0.524979187 | NULL&M | Disease |
| 11 | 117219961 | rs477858     | G | A | NULL | 0.524979187 | NULL&M | Disease |
| 11 | 117974397 | rs117950757  | A | G | NULL | 0.524979187 | NULL&M | Disease |
| 11 | 116760485 | rs117709132  | T | C | NULL | 0.524979187 | NULL&M | Disease |
| 11 | 117653955 | rs7119911    | T | G | NULL | 0.524979187 | NULL&M | Disease |
| 11 | 120570786 | rs61901366   | A | G | NULL | 0.524979187 | NULL&M | Disease |
| 11 | 117342536 | rs114831648  | C | T | NULL | 0.524979187 | NULL&M | Disease |
| 11 | 117451536 | rs684973     | C | G | NULL | 0.526225909 | NULL&M | Disease |
| 11 | 117430840 | rs55741146   | G | C | NULL | 0.526225909 | NULL&M | Disease |
| 11 | 116880018 | rs150734126  | C | T | NULL | 0.524979187 | NULL&M | Disease |
| 11 | 117175658 | rs116987336  | A | G | NULL | 0.524979187 | NULL&M | Disease |
| 11 | 117362331 | rs149861300  | C | A | NULL | 0.524979187 | NULL&M | Disease |
| 11 | 117906289 | rs74582224   | T | G | NULL | 0.524979187 | NULL&M | Disease |
| 11 | 117906406 | rs79791963   | G | C | NULL | 0.524979187 | NULL&M | Disease |
| 11 | 117906408 | rs78197730   | T | C | NULL | 0.524979187 | NULL&M | Disease |
| 11 | 120925525 | rs11218127   | G | A | NULL | 0.526225909 | NULL&M | Disease |
| 11 | 117582709 | rs79459688   | G | A | NULL | 0.524979187 | NULL&M | Disease |
| 11 | 120858815 | rs11218094   | T | G | NULL | 0.526225909 | NULL&M | Disease |
| 11 | 116831071 | rs622302     | G | A | NULL | 0.524979187 | NULL&M | Disease |
| 11 | 116833669 | rs493101     | A | G | NULL | 0.524979187 | NULL&M | Disease |
| 11 | 116835362 | rs541496     | T | C | NULL | 0.524979187 | NULL&M | Disease |
| 11 | 116835883 | rs667119     | T | A | NULL | 0.524979187 | NULL&M | Disease |
| 11 | 116836548 | rs2921655    | C | G | NULL | 0.524979187 | NULL&M | Disease |
| 11 | 116845538 | rs2513091    | G | A | NULL | 0.524979187 | NULL&M | Disease |
| 11 | 117518038 | rs626571     | C | T | NULL | 0.526225909 | NULL&M | Disease |
| 11 | 116640604 | rs1298336202 | T | C | NULL | 0.524979187 | NULL&M | Disease |
| 11 | 117566303 | rs10892163   | A | G | NULL | 0.526225909 | NULL&M | Disease |
| 11 | 117569923 | rs17121096   | C | T | NULL | 0.526225909 | NULL&M | Disease |
| 11 | 117611938 | rs77719730   | A | G | NULL | 0.526225909 | NULL&M | Disease |
| 11 | 118863232 | rs4938614    | A | G | NULL | 0.526225909 | NULL&M | Disease |
| 11 | 120570901 | rs61901367   | A | G | NULL | 0.526225909 | NULL&M | Disease |
| 11 | 120585020 | rs7120727    | C | G | NULL | 0.526225909 | NULL&M | Disease |
| 11 | 117101311 | rs1231238253 | T | C | NULL | 0.526225909 | NULL&M | Disease |
| 11 | 116909994 | rs73594175   | G | A | NULL | 0.526225909 | NULL&M | Disease |
| 11 | 116910320 | rs1475614837 | T | G | NULL | 0.526225909 | NULL&M | Disease |
| 11 | 116910427 | rs73594181   | A | T | NULL | 0.526225909 | NULL&M | Disease |
| 11 | 116910454 | rs79340485   | T | C | NULL | 0.526225909 | NULL&M | Disease |
| 11 | 120571229 | rs149505626  | A | G | NULL | 0.526225909 | NULL&M | Disease |
| 11 | 118099735 | rs149668068  | A | G | NULL | 0.526225909 | NULL&M | Disease |
| 11 | 120509335 | rs10892589   | T | C | NULL | 0.527472304 | NULL&M | Disease |
| 11 | 116601062 | rs148945243  | T | C | NULL | 0.526225909 | NULL&M | Disease |
| 11 | 116828484 | rs497653     | C | T | NULL | 0.526225909 | NULL&M | Disease |
| 11 | 117062489 | rs3213459    | C | T | NULL | 0.527472304 | NULL&M | Disease |
| 11 | 116578217 | rs12221682   | G | C | NULL | 0.527472304 | NULL&M | Disease |
| 11 | 119939927 | rs592565     | A | G | NULL | 0.527472304 | NULL&M | Disease |
| 11 | 116847584 | rs3016611    | A | G | NULL | 0.526225909 | NULL&M | Disease |
| 11 | 117564052 | rs11216506   | G | A | NULL | 0.527472304 | NULL&M | Disease |
| 11 | 117467394 | rs2186761    | A | G | NULL | 0.527472304 | NULL&M | Disease |
| 11 | 121011507 | rs638496     | T | C | NULL | 0.527472304 | NULL&M | Disease |
| 11 | 116538407 | rs57258844   | C | G | NULL | 0.527472304 | NULL&M | Disease |
| 11 | 117407435 | rs17120841   | G | A | NULL | 0.526225909 | NULL&M | Disease |
| 11 | 117409971 | rs74735117   | C | T | NULL | 0.526225909 | NULL&M | Disease |
| 11 | 120647015 | rs58174358   | T | C | NULL | 0.527472304 | NULL&M | Disease |

|    |           |             |   |   |       |           |           |        |          |
|----|-----------|-------------|---|---|-------|-----------|-----------|--------|----------|
| 11 | 117672561 | rs10892173  | T | C | 0.947 | -7977.388 | -7977.577 | -0.189 | 3.20E-06 |
| 11 | 116807970 | rs473172    | A | G | 0.933 | -7977.388 | -7977.578 | -0.19  | 3.20E-06 |
| 11 | 117062158 | rs139685157 | A | G | 1.1   | -7977.388 | -7977.578 | -0.19  | 3.20E-06 |
| 11 | 116710239 | rs632153    | T | G | 0.904 | -7977.388 | -7977.579 | -0.191 | 3.20E-06 |
| 11 | 117795189 | rs75195166  | A | G | 0.912 | -7977.388 | -7977.58  | -0.192 | 3.19E-06 |
| 11 | 120569355 | rs61901361  | G | A | 0.93  | -7977.388 | -7977.581 | -0.192 | 3.19E-06 |
| 11 | 116678191 | rs61905133  | G | A | 1.098 | -7977.388 | -7977.581 | -0.193 | 3.19E-06 |
| 11 | 117303108 | rs76347292  | C | T | 0.919 | -7977.388 | -7977.581 | -0.193 | 3.19E-06 |
| 11 | 118852081 | rs4938606   | G | A | 1.056 | -7977.388 | -7977.582 | -0.193 | 3.19E-06 |
| 11 | 118858878 | rs188758920 | A | C | 1.105 | -7977.388 | -7977.581 | -0.193 | 3.19E-06 |
| 11 | 116271393 | rs191301146 | T | C | 0.903 | -7977.388 | -7977.583 | -0.194 | 3.19E-06 |
| 11 | 117424005 | rs576390    | A | G | 1.058 | -7977.388 | -7977.582 | -0.194 | 3.19E-06 |
| 11 | 118028648 | rs73014974  | T | C | 0.906 | -7977.388 | -7977.582 | -0.194 | 3.19E-06 |
| 11 | 117904550 | rs11216714  | A | G | 0.906 | -7977.388 | -7977.584 | -0.195 | 3.18E-06 |
| 11 | 117904710 | rs12223224  | T | C | 0.906 | -7977.388 | -7977.584 | -0.195 | 3.18E-06 |
| 11 | 117904793 | rs12226036  | G | A | 0.906 | -7977.388 | -7977.584 | -0.195 | 3.18E-06 |
| 11 | 117905217 | rs11216715  | T | A | 0.906 | -7977.388 | -7977.584 | -0.195 | 3.18E-06 |
| 11 | 117905394 | rs11216716  | A | G | 0.906 | -7977.388 | -7977.584 | -0.195 | 3.18E-06 |
| 11 | 117905495 | rs80001712  | T | C | 0.906 | -7977.388 | -7977.584 | -0.195 | 3.18E-06 |
| 11 | 117905654 | rs12223683  | A | G | 0.906 | -7977.388 | -7977.584 | -0.195 | 3.18E-06 |
| 11 | 117905786 | rs79075579  | T | C | 0.906 | -7977.388 | -7977.584 | -0.195 | 3.18E-06 |
| 11 | 116598315 | rs141414463 | T | C | 0.906 | -7977.388 | -7977.585 | -0.197 | 3.18E-06 |
| 11 | 116774447 | rs34144542  | G | A | 1.084 | -7977.388 | -7977.585 | -0.197 | 3.18E-06 |
| 11 | 117032959 | rs12281009  | G | A | 1.089 | -7977.388 | -7977.585 | -0.197 | 3.18E-06 |
| 11 | 117795283 | rs74391474  | C | G | 0.913 | -7977.388 | -7977.586 | -0.197 | 3.18E-06 |
| 11 | 117795285 | rs74578710  | A | G | 0.913 | -7977.388 | -7977.586 | -0.197 | 3.18E-06 |
| 11 | 116818187 | rs3133352   | A | G | 0.904 | -7977.388 | -7977.586 | -0.198 | 3.17E-06 |
| 11 | 116819991 | rs1261706   | A | T | 0.904 | -7977.388 | -7977.586 | -0.198 | 3.17E-06 |
| 11 | 116827565 | rs587703    | G | A | 0.904 | -7977.388 | -7977.586 | -0.198 | 3.17E-06 |
| 11 | 116844279 | rs2513092   | C | T | 0.904 | -7977.388 | -7977.588 | -0.199 | 3.17E-06 |
| 11 | 120456533 | rs11602493  | A | G | 1.056 | -7977.388 | -7977.587 | -0.199 | 3.17E-06 |
| 11 | 117424306 | rs573648    | A | G | 1.058 | -7977.388 | -7977.589 | -0.2   | 3.17E-06 |
| 11 | 116788699 | rs10750099  | A | C | 0.905 | -7977.388 | -7977.59  | -0.202 | 3.16E-06 |
| 11 | 116789635 | rs6589579   | C | A | 0.905 | -7977.388 | -7977.59  | -0.202 | 3.16E-06 |
| 11 | 117084396 | rs12418705  | T | C | 1.089 | -7977.388 | -7977.59  | -0.202 | 3.16E-06 |
| 11 | 117495049 | rs6589616   | T | C | 0.943 | -7977.388 | -7977.59  | -0.202 | 3.16E-06 |
| 11 | 117617379 | rs1893038   | C | T | 0.904 | -7977.388 | -7977.591 | -0.202 | 3.       |

|    |           |              |   |   |      |             |        |         |
|----|-----------|--------------|---|---|------|-------------|--------|---------|
| 11 | 116523063 | rs12805779   | T | G | NULL | 0.527472304 | NULL&M | Disease |
| 11 | 118807639 | rs73575454   | A | G | NULL | 0.527472304 | NULL&M | Disease |
| 11 | 116515420 | rs4938294    | T | C | NULL | 0.527472304 | NULL&M | Disease |
| 11 | 119729992 | rs500401     | T | C | NULL | 0.527472304 | NULL&M | Disease |
| 11 | 118804989 | rs112045567  | G | A | NULL | 0.527472304 | NULL&M | Disease |
| 11 | 116292201 | rs76388159   | G | A | NULL | 0.527472304 | NULL&M | Disease |
| 11 | 116371442 | rs60171666   | A | G | NULL | 0.528718357 | NULL&M | Disease |
| 11 | 116838615 | rs581122     | T | C | NULL | 0.527472304 | NULL&M | Disease |
| 11 | 118018518 | rs140305819  | A | G | NULL | 0.527472304 | NULL&M | Disease |
| 11 | 120571702 | rs61901369   | C | T | NULL | 0.528718357 | NULL&M | Disease |
| 11 | 117953688 | rs7937420    | A | G | NULL | 0.528718357 | NULL&M | Disease |
| 11 | 120334905 | rs79844114   | G | A | NULL | 0.527472304 | NULL&M | Disease |
| 11 | 116915229 | rs1270305911 | T | C | NULL | 0.527472304 | NULL&M | Disease |
| 11 | 116915881 | rs73594187   | C | T | NULL | 0.527472304 | NULL&M | Disease |
| 11 | 116921143 | rs145339787  | C | T | NULL | 0.527472304 | NULL&M | Disease |
| 11 | 118863037 | rs4938612    | C | T | NULL | 0.528718357 | NULL&M | Disease |
| 11 | 121083183 | rs12788122   | A | G | NULL | 0.528718357 | NULL&M | Disease |
| 11 | 116907449 | rs721783     | T | C | NULL | 0.528718357 | NULL&M | Disease |
| 11 | 117324068 | rs4936380    | A | G | NULL | 0.528718357 | NULL&M | Disease |
| 11 | 117913430 | rs675479     | G | A | NULL | 0.528718357 | NULL&M | Disease |
| 11 | 120630028 | rs72995842   | T | C | NULL | 0.527472304 | NULL&M | Disease |
| 11 | 116738046 | rs518547     | G | A | NULL | 0.528718357 | NULL&M | Disease |
| 11 | 119928865 | rs11603573   | G | C | NULL | 0.528718357 | NULL&M | Disease |
| 11 | 120573725 | rs61901376   | G | A | NULL | 0.528718357 | NULL&M | Disease |
| 11 | 120620840 | rs115933113  | C | G | NULL | 0.528718357 | NULL&M | Disease |
| 11 | 116358593 | rs60905351   | A | G | NULL | 0.528718357 | NULL&M | Disease |
| 11 | 117500587 | rs117445862  | C | T | NULL | 0.528718357 | NULL&M | Disease |
| 11 | 117500633 | rs141182805  | G | T | NULL | 0.528718357 | NULL&M | Disease |
| 11 | 120798629 | rs1893816    | T | C | NULL | 0.529964052 | NULL&M | Disease |
| 11 | 117064776 | rs11605883   | G | C | NULL | 0.528718357 | NULL&M | Disease |
| 11 | 117531887 | rs643758     | T | A | NULL | 0.529964052 | NULL&M | Disease |
| 11 | 118804643 | rs56933877   | A | G | NULL | 0.529964052 | NULL&M | Disease |
| 11 | 120564637 | rs12272864   | C | T | NULL | 0.529964052 | NULL&M | Disease |
| 11 | 120586773 | rs61901399   | T | C | NULL | 0.529964052 | NULL&M | Disease |
| 11 | 117010474 | rs77661993   | C | A | NULL | 0.529964052 | NULL&M | Disease |
| 11 | 117372281 | rs7928478    | A | G | NULL | 0.529964052 | NULL&M | Disease |
| 11 | 117420163 | rs10790192   | A | G | NULL | 0.529964052 | NULL&M | Disease |
| 11 | 119468521 | rs78914704   | A | G | NULL | 0.529964052 | NULL&M | Disease |
| 11 | 117476375 | rs58248287   | G | A | NULL | 0.528718357 | NULL&M | Disease |
| 11 | 117502729 | rs111607963  | T | C | NULL | 0.529964052 | NULL&M | Disease |
| 11 | 117906273 | rs74586480   | G | A | NULL | 0.529964052 | NULL&M | Disease |
| 11 | 120116018 | rs58594771   | C | T | NULL | 0.529964052 | NULL&M | Disease |
| 11 | 116237970 | rs490296     | C | T | NULL | 0.531209373 | NULL&M | Disease |
| 11 | 116530998 | rs11216080   | T | G | NULL | 0.529964052 | NULL&M | Disease |
| 11 | 119678986 | rs10892470   | C | T | NULL | 0.531209373 | NULL&M | Disease |
| 11 | 117503731 | rs7126973    | T | A | NULL | 0.531209373 | NULL&M | Disease |
| 11 | 118828184 | rs45586434   | A | C | NULL | 0.531209373 | NULL&M | Disease |
| 11 | 120646975 | rs17124305   | G | A | NULL | 0.529964052 | NULL&M | Disease |
| 11 | 117323004 | rs4499034    | T | C | NULL | 0.531209373 | NULL&M | Disease |
| 11 | 117531358 | rs12417881   | G | A | NULL | 0.531209373 | NULL&M | Disease |
| 11 | 117591654 | rs948105     | A | T | NULL | 0.529964052 | NULL&M | Disease |
| 11 | 117010091 | rs115991973  | A | G | NULL | 0.531209373 | NULL&M | Disease |
| 11 | 117010123 | rs116384608  | G | A | NULL | 0.531209373 | NULL&M | Disease |
| 11 | 117436510 | rs141047910  | C | G | NULL | 0.529964052 | NULL&M | Disease |
| 11 | 118858911 | rs7110034    | A | C | NULL | 0.531209373 | NULL&M | Disease |
| 11 | 117502942 | rs116979369  | T | C | NULL | 0.529964052 | NULL&M | Disease |
| 11 | 117745018 | rs7102557    | A | G | NULL | 0.531209373 | NULL&M | Disease |
| 11 | 118853488 | rs4290240    | G | A | NULL | 0.531209373 | NULL&M | Disease |
| 11 | 120650530 | rs116727415  | T | A | NULL | 0.529964052 | NULL&M | Disease |
| 11 | 117050918 | rs12419178   | T | C | NULL | 0.531209373 | NULL&M | Disease |
| 11 | 117385478 | rs675522     | C | G | NULL | 0.531209373 | NULL&M | Disease |
| 11 | 117483022 | rs75500945   | T | C | NULL | 0.531209373 | NULL&M | Disease |
| 11 | 117483626 | rs74941224   | T | C | NULL | 0.531209373 | NULL&M | Disease |
| 11 | 117484221 | rs74860176   | T | C | NULL | 0.531209373 | NULL&M | Disease |
| 11 | 118804919 | rs73575441   | C | T | NULL | 0.531209373 | NULL&M | Disease |
| 11 | 118824917 | rs11217102   | A | G | NULL | 0.531209373 | NULL&M | Disease |
| 11 | 117565069 | rs11216507   | C | T | NULL | 0.531209373 | NULL&M | Disease |
| 11 | 119795611 | rs479455     | T | G | NULL | 0.531209373 | NULL&M | Disease |
| 11 | 116237017 | rs571139     | A | G | NULL | 0.532454306 | NULL&M | Disease |
| 11 | 117709688 | rs11216575   | G | A | NULL | 0.531209373 | NULL&M | Disease |
| 11 | 117519147 | rs10892148   | T | C | NULL | 0.532454306 | NULL&M | Disease |
| 11 | 117710150 | rs11216577   | T | C | NULL | 0.531209373 | NULL&M | Disease |
| 11 | 117798560 | rs12361671   | A | T | NULL | 0.532454306 | NULL&M | Disease |
| 11 | 118964577 | rs7103570    | C | T | NULL | 0.531209373 | NULL&M | Disease |
| 11 | 116529956 | rs71480309   | T | C | NULL | 0.532454306 | NULL&M | Disease |
| 11 | 117591584 | rs948106     | C | T | NULL | 0.532454306 | NULL&M | Disease |
| 11 | 116642049 | rs111683933  | C | T | NULL | 0.531209373 | NULL&M | Disease |
| 11 | 117492693 | rs74335840   | A | T | NULL | 0.531209373 | NULL&M | Disease |
| 11 | 117493342 | rs117470649  | G | A | NULL | 0.531209373 | NULL&M | Disease |
| 11 | 118755630 | rs3176905    | C | T | NULL | 0.532454306 | NULL&M | Disease |
| 11 | 119672156 | rs4938724    | A | G | NULL | 0.532454306 | NULL&M | Disease |
| 11 | 119756962 | rs75436216   | C | T | NULL | 0.531209373 | NULL&M | Disease |
| 11 | 116650571 | rs113271699  | A | C | NULL | 0.531209373 | NULL&M | Disease |
| 11 | 119478010 | rs150773762  | G | A | NULL | 0.532454306 | NULL&M | Disease |
| 11 | 120890870 | rs73011533   | A | G | NULL | 0.532454306 | NULL&M | Disease |
| 11 | 120874281 | rs116862564  | G | C | NULL | 0.532454306 | NULL&M | Disease |
| 11 | 116281169 | rs538359     | C | T | NULL | 0.532454306 | NULL&M | Disease |
| 11 | 116328597 | rs12420339   | G | T | NULL | 0.532454306 | NULL&M | Disease |
| 11 | 116658122 | rs2075294    | T | G | NULL | 0.532454306 | NULL&M | Disease |
| 11 | 116870420 | rs113419013  | T | C | NULL | 0.532454306 | NULL&M | Disease |
| 11 | 117992155 | rs627999     | T | C | NULL | 0.532454306 | NULL&M | Disease |
| 11 | 120461835 | rs17311310   | A | G | NULL | 0.533698835 | NULL&M | Disease |
| 11 | 116645682 | rs45443305   | A | C | NULL | 0.532454306 | NULL&M | Disease |
| 11 | 119914616 | rs681569     | A | C | NULL | 0.532454306 | NULL&M | Disease |
| 11 | 120910225 | rs143427408  | T | C | NULL | 0.532454306 | NULL&M | Disease |
| 11 | 117051725 | rs76883864   | T | C | NULL | 0.533698835 | NULL&M | Disease |

|    |           |              |   |   |       |           |           |        |          |
|----|-----------|--------------|---|---|-------|-----------|-----------|--------|----------|
| 11 | 116523063 | rs12805779   | T | G | 1.068 | -7977.388 | -7977.613 | -0.225 | 3.09E-06 |
| 11 | 118807639 | rs73575454   | A | G | 0.92  | -7977.388 | -7977.613 | -0.225 | 3.09E-06 |
| 11 | 116515420 | rs4938294    | T | C | 1.065 | -7977.388 | -7977.614 | -0.226 | 3.09E-06 |
| 11 | 119729992 | rs500401     | T | C | 1.085 | -7977.388 | -7977.614 | -0.226 | 3.09E-06 |
| 11 | 118804989 | rs112045567  | G | A | 0.92  | -7977.388 | -7977.617 | -0.228 | 3.08E-06 |
| 11 | 116292201 | rs76388159   | G | A | 1.095 | -7977.388 | -7977.617 | -0.229 | 3.08E-06 |
| 11 | 116371442 | rs60171666   | A | G | 0.947 | -7977.388 | -7977.617 | -0.229 | 3.08E-06 |
| 11 | 116838615 | rs581122     | T | C | 0.907 | -7977.388 | -7977.617 | -0.229 | 3.08E-06 |
| 11 | 118018518 | rs140305819  | A | G | 1.099 | -7977.388 | -7977.617 | -0.229 | 3.08E-06 |
| 11 | 120571702 | rs61901369   | C | T | 0.931 | -7977.388 | -7977.618 | -0.229 | 3.08E-06 |
| 11 | 117953688 | rs7937420    | A | G | 0.946 | -7977.388 | -7977.62  | -0.231 | 3.07E-06 |
| 11 | 120334905 | rs79844114   | G | A | 0.909 | -7977.388 | -7977.62  | -0.231 | 3.07E-06 |
| 11 | 116915229 | rs1270305911 | T | C | 0.907 | -7977.388 | -7977.62  | -0.232 | 3.07E-06 |
| 11 | 116915881 | rs73594187   | C | T | 0.907 | -7977.388 | -7977.62  | -0.232 | 3.07E-06 |
| 11 | 116921143 | rs145339787  | C | T | 0.907 | -7977.388 | -7977.62  | -0.232 | 3.07E-06 |
| 11 | 118863037 | rs4938612    | C | T | 1.055 | -7977.388 | -7977.621 | -0.232 | 3.07E-06 |
| 11 | 121083183 | rs12788122   | A | G | 0.919 | -7977.388 | -7977.62  | -0.232 | 3.07E-06 |
| 11 | 116907449 | rs721783     | T | C | 1.062 | -7977.388 | -7977.622 | -0.234 | 3.06E-06 |
| 11 | 117324068 | rs4936380    | A | G | 0.922 | -7977.388 | -7977.623 | -0.234 | 3.06E-06 |
| 11 | 117913430 | rs675479     | G | A | 1.055 | -7977.388 | -7977.623 | -0.234 | 3.06E-06 |
| 11 | 120630028 | rs72995842   | T | C | 0.908 | -7977.388 | -7977.622 | -0.234 | 3.06E-06 |
| 11 | 116738046 | rs518547     | G | A | 1.063 | -7977.388 | -7977.623 | -0.235 | 3.06E-06 |
| 11 | 119928865 | rs11603573   | G | C | 1.087 | -7977.388 | -7977.624 | -0.236 | 3.05E-06 |
| 11 | 120573725 | rs61901376   | G | A | 0.93  | -7977.388 | -7977.625 | -0.237 | 3.05E-06 |
| 11 | 120620840 | rs115933113  | C | G | 0.911 | -7977.388 | -7977.626 | -0.237 | 3.05E-06 |
| 11 | 116358593 | rs60905351   | A | G | 0.93  | -7977.388 | -7977.626 | -0.238 | 3.05E-06 |
| 11 | 117500587 | rs117445862  | C | T | 0.908 | -7977.388 | -7977.627 | -0.239 | 3.05E-06 |
| 11 | 117500633 | rs141182805  | G | T | 0.908 | -7977.388 | -7977.627 | -0.239 | 3.05E-06 |
| 11 | 120798629 | rs1893816    | T | C | 0.938 | -7977.388 | -7977.627 | -0.239 | 3.05E-06 |
| 11 | 117064776 | rs11605883   | G | C | 1.087 | -7977.388 | -7977.628 | -0.24  | 3.04E-06 |
| 11 | 117531887 | rs643758     | T | A | 0.948 | -7977.388 | -7977.628 | -0.24  | 3.04E-06 |
| 11 | 118804643 | rs56933877   | A | G | 0.921 | -7977.388 | -7977.629 | -0.241 | 3.04E-06 |
| 11 | 120564637 | rs12272864   | C | T | 0.931 | -7977.388 | -7977.629 | -0.241 | 3.04E-06 |
| 11 | 120586773 | rs61901399   | T | C | 0.93  | -7977.388 | -7977.63  | -0.241 | 3.04E-06 |
| 11 | 117010474 | rs77661993   | C | A | 1.087 | -7977.388 | -7977.63  | -0.242 | 3.04E-06 |
| 11 | 117372281 | rs7928478    | A | G | 1.058 | -7977.388 | -7977.63  | -0.242 | 3.04E-06 |
| 11 | 117420163 | rs10790192   | A | G | 0.948 | -7977.388 | -7977.63  | -0.242 |          |

|    |           |              |   |   |      |             |        |         |
|----|-----------|--------------|---|---|------|-------------|--------|---------|
| 11 | 120396329 | rs17123976   | C | T | NULL | 0.532454306 | NULL&M | Disease |
| 11 | 120462417 | rs17311317   | A | G | NULL | 0.533698835 | NULL&M | Disease |
| 11 | 116702778 | rs5132       | T | C | NULL | 0.532454306 | NULL&M | Disease |
| 11 | 116639692 | rs1268353    | T | C | NULL | 0.533698835 | NULL&M | Disease |
| 11 | 116948640 | rs7124649    | C | T | NULL | 0.533698835 | NULL&M | Disease |
| 11 | 117800269 | rs11216633   | G | C | NULL | 0.533698835 | NULL&M | Disease |
| 11 | 117800328 | rs11216634   | G | A | NULL | 0.533698835 | NULL&M | Disease |
| 11 | 116828121 | rs1940626    | C | T | NULL | 0.534942945 | NULL&M | Disease |
| 11 | 117517366 | rs536761     | T | C | NULL | 0.534942945 | NULL&M | Disease |
| 11 | 117708625 | rs520333     | A | G | NULL | 0.534942945 | NULL&M | Disease |
| 11 | 117922310 | rs78760381   | T | C | NULL | 0.533698835 | NULL&M | Disease |
| 11 | 117946138 | rs714053     | T | C | NULL | 0.533698835 | NULL&M | Disease |
| 11 | 11793489  | rs665759     | A | G | NULL | 0.534942945 | NULL&M | Disease |
| 11 | 11793573  | rs529373     | T | C | NULL | 0.534942945 | NULL&M | Disease |
| 11 | 116725303 | rs640411     | C | G | NULL | 0.533698835 | NULL&M | Disease |
| 11 | 11795594  | rs551163     | A | C | NULL | 0.534942945 | NULL&M | Disease |
| 11 | 120588100 | rs2846109    | C | T | NULL | 0.534942945 | NULL&M | Disease |
| 11 | 117054709 | rs2046149    | G | C | NULL | 0.534942945 | NULL&M | Disease |
| 11 | 116654959 | rs74662600   | A | G | NULL | 0.533698835 | NULL&M | Disease |
| 11 | 116712442 | rs113749676  | T | C | NULL | 0.533698835 | NULL&M | Disease |
| 11 | 119713633 | rs73008650   | A | G | NULL | 0.534942945 | NULL&M | Disease |
| 11 | 119814550 | rs61899037   | A | G | NULL | 0.533698835 | NULL&M | Disease |
| 11 | 120574350 | rs17124211   | G | A | NULL | 0.534942945 | NULL&M | Disease |
| 11 | 120710210 | rs28737445   | G | A | NULL | 0.534942945 | NULL&M | Disease |
| 11 | 116705021 | rs1263162    | A | T | NULL | 0.533698835 | NULL&M | Disease |
| 11 | 119490788 | rs79801588   | G | A | NULL | 0.534942945 | NULL&M | Disease |
| 11 | 119668263 | rs4272793    | C | A | NULL | 0.534942945 | NULL&M | Disease |
| 11 | 117030633 | rs1312592595 | C | T | NULL | 0.534942945 | NULL&M | Disease |
| 11 | 117500542 | rs10892146   | T | A | NULL | 0.534942945 | NULL&M | Disease |
| 11 | 120733629 | rs4512872    | C | A | NULL | 0.534942945 | NULL&M | Disease |
| 11 | 116424420 | rs17119814   | G | C | NULL | 0.534942945 | NULL&M | Disease |
| 11 | 116238034 | rs491111     | A | G | NULL | 0.534942945 | NULL&M | Disease |
| 11 | 120593745 | rs11606461   | T | C | NULL | 0.534942945 | NULL&M | Disease |
| 11 | 116875338 | rs6589587    | G | T | NULL | 0.53618662  | NULL&M | Disease |
| 11 | 117613781 | rs7950743    | A | G | NULL | 0.534942945 | NULL&M | Disease |
| 11 | 117897098 | rs685308     | G | C | NULL | 0.53618662  | NULL&M | Disease |
| 11 | 119922708 | rs78699173   | A | C | NULL | 0.534942945 | NULL&M | Disease |
| 11 | 116514997 | rs67613157   | T | C | NULL | 0.53618662  | NULL&M | Disease |
| 11 | 117102307 | rs2509209    | G | A | NULL | 0.53618662  | NULL&M | Disease |
| 11 | 117349817 | rs7929976    | G | A | NULL | 0.53618662  | NULL&M | Disease |
| 11 | 117308432 | rs17120753   | C | T | NULL | 0.53618662  | NULL&M | Disease |
| 11 | 119901422 | rs669812     | T | C | NULL | 0.53618662  | NULL&M | Disease |
| 11 | 120474008 | rs4936528    | G | C | NULL | 0.53618662  | NULL&M | Disease |
| 11 | 117385531 | rs1807049    | G | A | NULL | 0.53618662  | NULL&M | Disease |
| 11 | 117411730 | rs35266957   | T | C | NULL | 0.534942945 | NULL&M | Disease |
| 11 | 117414844 | rs3802878    | C | A | NULL | 0.534942945 | NULL&M | Disease |
| 11 | 119516805 | rs4938700    | C | G | NULL | 0.53618662  | NULL&M | Disease |
| 11 | 116239462 | rs79643426   | T | C | NULL | 0.53618662  | NULL&M | Disease |
| 11 | 119831163 | rs35962410   | C | A | NULL | 0.53618662  | NULL&M | Disease |
| 11 | 117944485 | rs11216736   | C | T | NULL | 0.53618662  | NULL&M | Disease |
| 11 | 116941985 | rs7101763    | T | G | NULL | 0.537429845 | NULL&M | Disease |
| 11 | 116945718 | rs4620758    | A | G | NULL | 0.537429845 | NULL&M | Disease |
| 11 | 117560679 | rs57550545   | C | T | NULL | 0.53618662  | NULL&M | Disease |
| 11 | 116946652 | rs7130213    | A | C | NULL | 0.537429845 | NULL&M | Disease |
| 11 | 117488572 | rs59258276   | C | T | NULL | 0.53618662  | NULL&M | Disease |
| 11 | 120574079 | rs61901377   | G | A | NULL | 0.537429845 | NULL&M | Disease |
| 11 | 117488030 | rs148543195  | T | C | NULL | 0.53618662  | NULL&M | Disease |
| 11 | 120572772 | rs117165966  | C | G | NULL | 0.537429845 | NULL&M | Disease |
| 11 | 120572814 | rs142600127  | A | G | NULL | 0.537429845 | NULL&M | Disease |
| 11 | 116225940 | rs12576431   | G | C | NULL | 0.537429845 | NULL&M | Disease |
| 11 | 119509625 | rs1022080    | C | T | NULL | 0.537429845 | NULL&M | Disease |
| 11 | 120126017 | rs79988761   | A | G | NULL | 0.537429845 | NULL&M | Disease |
| 11 | 119881526 | rs1893394    | A | G | NULL | 0.537429845 | NULL&M | Disease |
| 11 | 117713187 | rs12363888   | T | C | NULL | 0.537429845 | NULL&M | Disease |
| 11 | 120734419 | rs4344499    | G | T | NULL | 0.537429845 | NULL&M | Disease |
| 11 | 120837575 | rs7939112    | A | G | NULL | 0.537429845 | NULL&M | Disease |
| 11 | 120851138 | rs34203183   | G | C | NULL | 0.537429845 | NULL&M | Disease |
| 11 | 116424451 | rs78381558   | C | G | NULL | 0.538672605 | NULL&M | Disease |
| 11 | 116638854 | rs78908794   | C | T | NULL | 0.537429845 | NULL&M | Disease |
| 11 | 117061775 | rs12419470   | T | C | NULL | 0.537429845 | NULL&M | Disease |
| 11 | 117061825 | rs61703672   | T | C | NULL | 0.537429845 | NULL&M | Disease |
| 11 | 117065066 | rs3781985    | C | G | NULL | 0.537429845 | NULL&M | Disease |
| 11 | 117065153 | rs80183569   | A | G | NULL | 0.537429845 | NULL&M | Disease |
| 11 | 117065533 | rs11606480   | A | G | NULL | 0.537429845 | NULL&M | Disease |
| 11 | 117225247 | rs117754274  | C | G | NULL | 0.537429845 | NULL&M | Disease |
| 11 | 119922728 | rs79533157   | C | G | NULL | 0.537429845 | NULL&M | Disease |
| 11 | 120563557 | rs34463064   | T | C | NULL | 0.53618662  | NULL&M | Disease |
| 11 | 120834991 | rs7948885    | A | G | NULL | 0.538672605 | NULL&M | Disease |
| 11 | 119807402 | rs10790356   | T | A | NULL | 0.538672605 | NULL&M | Disease |
| 11 | 116818527 | rs112704540  | G | A | NULL | 0.538672605 | NULL&M | Disease |
| 11 | 119730115 | rs79365963   | C | T | NULL | 0.538672605 | NULL&M | Disease |
| 11 | 120577100 | rs12295113   | T | C | NULL | 0.538672605 | NULL&M | Disease |
| 11 | 120572387 | rs61901372   | C | T | NULL | 0.538672605 | NULL&M | Disease |
| 11 | 120572952 | rs61901374   | C | T | NULL | 0.538672605 | NULL&M | Disease |
| 11 | 120573265 | rs61901375   | C | T | NULL | 0.538672605 | NULL&M | Disease |
| 11 | 117015516 | rs12419272   | G | C | NULL | 0.538672605 | NULL&M | Disease |
| 11 | 117035319 | rs12420127   | G | A | NULL | 0.538672605 | NULL&M | Disease |
| 11 | 117941082 | rs143620404  | T | G | NULL | 0.537429845 | NULL&M | Disease |
| 11 | 116236469 | rs545675     | T | C | NULL | 0.538672605 | NULL&M | Disease |
| 11 | 116789849 | rs76844341   | G | A | NULL | 0.537429845 | NULL&M | Disease |
| 11 | 116953645 | rs1871756    | A | G | NULL | 0.538672605 | NULL&M | Disease |
| 11 | 118285369 | rs150339153  | T | C | NULL | 0.538672605 | NULL&M | Disease |
| 11 | 120084221 | rs1551242    | T | C | NULL | 0.538672605 | NULL&M | Disease |
| 11 | 120084509 | rs1551241    | C | T | NULL | 0.538672605 | NULL&M | Disease |
| 11 | 117384412 | rs7107020    | C | T | NULL | 0.538672605 | NULL&M | Disease |
| 11 | 120583174 | rs6589834    | C | G | NULL | 0.538672605 | NULL&M | Disease |

|    |           |              |   |   |       |           |           |        |          |
|----|-----------|--------------|---|---|-------|-----------|-----------|--------|----------|
| 11 | 120396329 | rs17123976   | C | T | 0.91  | -7977.388 | -7977.661 | -0.272 | 2.95E-06 |
| 11 | 120462417 | rs17311317   | A | G | 1.055 | -7977.388 | -7977.66  | -0.272 | 2.95E-06 |
| 11 | 116702778 | rs5132       | T | C | 0.911 | -7977.388 | -7977.663 | -0.275 | 2.94E-06 |
| 11 | 116639692 | rs1268353    | T | C | 1.056 | -7977.388 | -7977.664 | -0.276 | 2.94E-06 |
| 11 | 116948640 | rs7124649    | C | T | 0.911 | -7977.388 | -7977.665 | -0.276 | 2.94E-06 |
| 11 | 117800269 | rs11216633   | G | C | 0.929 | -7977.388 | -7977.665 | -0.276 | 2.94E-06 |
| 11 | 117800328 | rs11216634   | G | A | 0.929 | -7977.388 | -7977.665 | -0.276 | 2.94E-06 |
| 11 | 116828121 | rs1940626    | C | T | 1.061 | -7977.388 | -7977.667 | -0.278 | 2.93E-06 |
| 11 | 117517366 | rs536761     | T | C | 0.948 | -7977.388 | -7977.666 | -0.278 | 2.93E-06 |
| 11 | 117708625 | rs520333     | A | G | 0.947 | -7977.388 | -7977.666 | -0.278 | 2.93E-06 |
| 11 | 117922310 | rs78760381   | T | C | 0.912 | -7977.388 | -7977.666 | -0.278 | 2.93E-06 |
| 11 | 117946138 | rs714053     | T | C | 0.912 | -7977.388 | -7977.666 | -0.278 | 2.93E-06 |
| 11 | 11793489  | rs665759     | A | G | 0.944 | -7977.388 | -7977.666 | -0.278 | 2.93E-06 |
| 11 | 11793573  | rs529373     | T | C | 0.944 | -7977.388 | -7977.666 | -0.278 | 2.93E-06 |
| 11 | 116725303 | rs640411     | C | G | 0.911 | -7977.388 | -7977.668 | -0.279 | 2.93E-06 |
| 11 | 11795594  | rs551163     | A | C | 0.944 | -7977.388 | -7977.667 | -0.279 | 2.93E-06 |
| 11 | 120588100 | rs2846109    | C | T | 0.933 | -7977.388 | -7977.668 | -0.28  | 2.92E-06 |
| 11 | 117054709 | rs2046149    | G | C | 1.085 | -7977.388 | -7977.669 | -0.281 | 2.92E-06 |
| 11 | 116654959 | rs74662600   | A | G | 0.911 | -7977.388 | -7977.67  | -0.282 | 2.92E-06 |
| 11 | 116712442 | rs113749676  | T | C | 0.911 | -7977.388 | -7977.671 | -0.282 | 2.92E-06 |
| 11 | 119713633 | rs73008650   | A | G | 1.068 | -7977.388 | -7977.671 | -0.282 | 2.92E-06 |
| 11 | 119814550 | rs61899037   | A | G | 0.913 | -7977.388 | -7977.67  | -0.282 | 2.92E-06 |
| 11 | 120574350 | rs17124211   | G | A | 0.939 | -7977.388 | -7977.67  | -0.282 | 2.92E-06 |
| 11 | 120710210 | rs28737445   | G | A | 0.937 | -7977.388 | -7977.671 | -0.282 | 2.92E-06 |
| 11 | 116705021 | rs1263162    | A | T | 0.911 | -7977.388 | -7977.671 | -0.283 | 2.91E-06 |
| 11 | 119490788 | rs79801588   | G | A | 1.074 | -7977.388 | -7977.671 | -0.283 | 2.91E-06 |
| 11 | 119668263 | rs4272793    | C | A | 0.949 | -7977.388 | -7977.671 | -0.283 | 2.91E-06 |
| 11 | 117030633 | rs1312592595 | T | C | 1.085 | -7977.388 | -7977.672 | -0.284 | 2.91E-06 |
| 11 | 117500542 | rs10892146   | T | A | 0.944 | -7977.388 | -7977.673 | -0.284 | 2.91E-06 |
| 11 | 120733629 | rs4512872    | C | A | 1.06  | -7977.388 | -7977.673 | -0.285 | 2.91E-06 |
| 11 | 116424420 | rs17119814   | G | C | 1.067 | -7977.388 | -7977.674 | -0.286 | 2.91E-06 |
| 11 | 116238034 | rs491111     | A | G | 1.056 | -7977.388 | -7977.675 | -0.287 | 2.90E-06 |
| 11 | 120593745 | rs11606461   | T | C | 0.912 | -7977.388 | -7977.675 | -0.287 | 2.90E-06 |
| 11 | 116875338 | rs6589587    | G | T | 1.061 | -7977.388 | -7977.677 | -0.288 | 2.90E-06 |
| 11 | 117613781 | rs7950743    | A | G | 0.912 | -7977.388 | -7977.678 | -0.289 | 2.90E-06 |
| 11 | 117897098 | rs685308     | G | C | 0.946 | -7977.388 | -7977.678 | -0.289 | 2.90E-06 |
| 11 | 119922708 | rs78699173   | A | C | 1.095 | -7977.388 | -7977.677 | -0.289 | 2.90E-06 |
| 11 | 116514997 | rs67613157   | T | C | 1.064 | -7977.388 | -7977.678 | -0.29  | 2.89E-06 |
| 11 | 117102307 | rs2509209    | G | A | 0.946 | -7977.388 | -7977.679 | -0.29  | 2.89E-06 |
| 11 | 117349817 | rs7929976    | G | A | 1.062 | -7977.388 | -7977.678 | -0.29  | 2.89E-06 |
| 11 | 117308432 | rs17120753   | C | T | 0.927 | -7977.388 | -7977.679 | -0.291 | 2.89E-06 |
| 11 | 119901422 | rs669812     | T | C | 0.921 | -7977.388 | -7977.679 | -0.291 | 2.89E-06 |
| 11 | 120474008 | rs4936528    | G | C | 1.056 | -7977.388 | -7977.68  | -0.291 | 2.89E-06 |
| 11 | 117385531 | rs1807049    | G | A | 1.057 | -7977.388 | -7977.681 | -0.292 | 2.89E-06 |
| 11 | 117411730 | rs3266957    | T | C | 0.913 | -7977.388 | -7977.681 | -0.293 | 2.89E-06 |
| 11 | 117414844 | rs3802878    | C | A | 0.912 | -7977.388 | -7977.681 | -0.293 | 2.89E-06 |
| 11 | 119516805 | rs996700     | C | G | 0.926 | -7977.388 | -7977.682 | -0.294 | 2.88E-06 |
| 11 | 116239462 | rs7643426    | T | C | 1.076 | -7977.388 | -7977.684 | -0.296 | 2.88E-06 |
| 11 | 119831163 | rs35962410   | C | A | 1.087 | -7977.388 | -7977.684 | -0.296 | 2.88E-06 |
| 11 | 117944485 | rs11216736   | C | T | 0.913 | -7977.388 | -7977.686 | -0.297 | 2.87E-06 |
| 11 | 116941985 | rs7101763    | T | G | 1.061 | -7977.388 | -7977.686 | -0.298 | 2.87E-06 |
| 11 | 116945718 | rs4620758    | A | G | 1.061 | -7977.388 | -7977.686 | -0.298 | 2.87E-06 |
| 11 | 117560679 | rs5755045    | C | T | 0.936 | -7977.388 | -7977.686 | -0.298 | 2.87E-06 |
| 11 | 116946652 | rs7130213    | A | C | 1.061 | -7977.388 | -7977.687 | -0.299 | 2.87E-06 |
| 11 | 117488572 | rs9258276    | T | C | 0.913 | -7977.388 | -7977.688 | -0.299 | 2.87E-06 |
| 11 | 120574079 | rs61901377   | G | A | 0.932 | -7977.388 | -7977.687 | -0.299 | 2.87E-06 |
| 11 | 117488030 | rs148543195  | T | C | 0.913 | -7977.388 | -7977.688 | -0.3   | 2.87E-06 |
| 11 | 120572772 | rs171165966  | C | G | 0.933 | -7977.388 | -7977.69  | -0.302 | 2.86E-06 |
| 11 | 120572814 | rs142600127  | A | G | 0.933 | -7977.388 | -7977.69  | -0.302 | 2.86E-06 |
| 11 | 116225940 | rs12576431   | G | C | 0.922 | -7977.388 | -7977.691 | -0.303 | 2.86E-06 |
| 11 | 119509625 | rs1022080    | C | T | 0.93  | -7977.388 | -7977.691 | -0.303 | 2.86E-06 |
| 11 | 120126017 | rs79988761   | A | G | 0.929 | -7977.388 | -7977.692 | -0.304 | 2.85E-06 |
| 11 | 119881526 | rs1893394    | A | G | 0.933 | -7977.388 | -7977.693 | -0.305 | 2.85E-06 |
| 11 | 117713187 | rs12363888   | T | C | 1.084 | -7977.388 | -7977.695 | -0.306 | 2.85E-06 |
| 11 | 120734419 | rs43444989   | G | T | 1.06  | -7977.388 | -7977.694 | -0.306 | 2.85E-06 |
| 11 | 120837575 | rs7939112    | A | G | 0.942 | -7977.388 | -7977.694 | -0.306 | 2.85E-06 |
| 11 | 120851138 | rs34203183   | G | C | 0.94  | -7977.388 | -7977.695 | -0.307 | 2.85E-06 |
| 11 | 116424451 | rs78381558   | C | G | 1.067 | -7977.388 | -7977.697 | -0.308 | 2.84E-06 |
| 11 | 116638854 | rs78907984   | T | C | 0.913 | -7977.388 | -7977.696 | -0.308 | 2.84E-06 |
| 11 | 117061775 | rs12419470   | C | T | 1.084 | -7977.388 | -7977.697 | -0.308 | 2.84E-06 |
| 11 | 117061825 | rs7036762    | T | C | 1.084 | -7977.388 | -7977.697 | -0.308 | 2.84E-06 |
| 11 | 117065066 | rs781985     | C | G | 1.084 | -7977.388 | -7977.697 | -0.308 | 2.84E-06 |
| 11 | 117065153 | rs80183569   | A | G | 1.084 | -7977.388 | -7977.697 | -0.308 | 2.84E-06 |
| 11 | 117065533 | rs11606480   | A | G | 1.084 | -7977.388 | -7977.697 | -0.308 | 2.84E-06 |
| 11 | 117225247 | rs17754274   | C | G | 0.914 | -7977.388 | -7977.697 | -0.308 | 2.84E-06 |
| 11 | 119922728 | rs79533157   | C | G | 1.093 | -7977.388 | -7977.696 | -0.308 | 2.84E-06 |
| 11 | 120563557 | rs34463064   | T | C | 1.087 | -7977.388 | -7977.696 | -0.308 | 2.84E-06 |
| 11 | 120834991 | rs7948885    | A | G | 0.942 | -7977.388 | -7977.698 | -0.309 | 2.84E-06 |
| 11 | 119807402 | rs10790356   | T | A | 1.065 | -7977.388 | -7977.699 | -0.31  | 2.84E-06 |
| 11 | 116818527 | rs112704540  | G | A | 1.061 | -7977.388 | -7977.7   | -0.311 | 2.83E-06 |
| 11 | 119730115 | rs79365963   | C | T | 1.07  | -7977.388 | -7977.7   | -0.311 | 2.83E-06 |
| 11 | 120577100 | rs12295113   | T | C | 0.933 | -7977.388 | -7977.699 | -0.311 | 2.83E-06 |
| 11 | 120572387 | rs61901372   | C | T | 0.933 | -7977.388 | -7977.7   | -0.312 | 2.83E-06 |
| 11 | 120572952 | rs61901374   | C | T | 0.933 | -7977.388 | -7977.7   | -0.312 | 2.83E-06 |
| 11 | 120573265 | rs61901375   | C | T | 0.933 | -7977.388 | -7977.7   | -0.312 | 2.83E-06 |
| 11 | 117015516 | rs12419272   | G | C | 1.084 | -7977.388 | -7977.701 | -0.313 | 2.83E-06 |
| 11 | 117035319 | rs12420127   | G | A | 1.084 | -7977.388 | -7977.701 | -0.313 | 2.83E-06 |
| 11 | 117941082 | rs143620404  | T | G | 0.914 | -7977.388 | -7977.702 | -0.313 | 2.83E-06 |
| 11 | 116236469 | rs545675     | T | C | 1.055 | -7977.388 | -7977.703 | -0.314 | 2.83E-06 |
| 11 | 116789849 | rs76844341   | A | G | 0.914 | -7977.388 | -7977.702 | -0.314 | 2.83E-06 |
| 11 | 116953645 | rs1871756    | A | G | 1.061 | -7977.388 | -7977.703 | -0.314 | 2.83E-06 |
| 11 | 118285369 | rs150339153  | T | C | 0.916 | -7977.388 | -7977.702 | -0.314 | 2.83E-06 |
| 11 | 120084221 | rs1551242    | T | C | 0.915 | -7977.388 | -7977.703 | -0.315 | 2.82E-06 |
| 11 | 120084509 | rs1551241    | T | C | 0.915 | -7977.388 | -7977.703 | -0.315 | 2.82E-06 |
| 11 | 117384412 | rs1701020    | C | T | 0.947 | -7977.388 | -7977.704 | -0.316 | 2.82E-06 |
| 11 | 120583174 | rs6589834    | C | G | 0.934 | -7977.388 | -7977.704 | -0.316 | 2.82E-06 |

|    |           |             |   |   |      |             |        |         |
|----|-----------|-------------|---|---|------|-------------|--------|---------|
| 11 | 120824692 | rs11218078  | G | T | NULL | 0.538672605 | NULL&M | Disease |
| 11 | 121011823 | rs594951    | C | T | NULL | 0.538672605 | NULL&M | Disease |
| 11 | 117410428 | rs2509005   | A | G | NULL | 0.538672605 | NULL&M | Disease |
| 11 | 117482186 | rs184607052 | G | A | NULL | 0.538672605 | NULL&M | Disease |
| 11 | 116899414 | rs73594168  | T | C | NULL | 0.538672605 | NULL&M | Disease |
| 11 | 116899617 | rs73594169  | T | C | NULL | 0.538672605 | NULL&M | Disease |
| 11 | 119732432 | rs475159    | T | G | NULL | 0.538672605 | NULL&M | Disease |
| 11 | 116804144 | rs7107702   | C | T | NULL | 0.539914885 | NULL&M | Disease |
| 11 | 116972339 | rs78459638  | A | G | NULL | 0.538672605 | NULL&M | Disease |
| 11 | 117031363 | rs142017584 | A | G | NULL | 0.538672605 | NULL&M | Disease |
| 11 | 117039461 | rs116773440 | C | A | NULL | 0.538672605 | NULL&M | Disease |
| 11 | 119214292 | rs1893176   | G | A | NULL | 0.539914885 | NULL&M | Disease |
| 11 | 120572361 | rs61901371  | A | G | NULL | 0.539914885 | NULL&M | Disease |
| 11 | 116660768 | rs34089864  | A | G | NULL | 0.538672605 | NULL&M | Disease |
| 11 | 118014873 | rs112525313 | T | C | NULL | 0.539914885 | NULL&M | Disease |
| 11 | 119539324 | rs4938705   | A | G | NULL | 0.539914885 | NULL&M | Disease |
| 11 | 120445835 | rs4500499   | A | G | NULL | 0.539914885 | NULL&M | Disease |
| 11 | 117408179 | rs661631    | T | C | NULL | 0.539914885 | NULL&M | Disease |
| 11 | 119881097 | rs2848729   | T | C | NULL | 0.539914885 | NULL&M | Disease |
| 11 | 117351433 | rs553370    | G | A | NULL | 0.539914885 | NULL&M | Disease |
| 11 | 117797120 | rs73022498  | C | T | NULL | 0.539914885 | NULL&M | Disease |
| 11 | 116197556 | rs7932598   | T | G | NULL | 0.541156668 | NULL&M | Disease |
| 11 | 116700775 | rs12721090  | T | C | NULL | 0.539914885 | NULL&M | Disease |
| 11 | 119795133 | rs576764    | G | A | NULL | 0.541156668 | NULL&M | Disease |
| 11 | 116931087 | rs111426457 | G | C | NULL | 0.539914885 | NULL&M | Disease |
| 11 | 116934869 | rs7946101   | A | G | NULL | 0.539914885 | NULL&M | Disease |
| 11 | 116936488 | rs1982679   | A | G | NULL | 0.539914885 | NULL&M | Disease |
| 11 | 116939724 | rs10502225  | T | A | NULL | 0.539914885 | NULL&M | Disease |
| 11 | 116941382 | rs111641976 | A | G | NULL | 0.539914885 | NULL&M | Disease |
| 11 | 116942479 | rs57787606  | A | G | NULL | 0.539914885 | NULL&M | Disease |
| 11 | 116944304 | rs73576634  | T | G | NULL | 0.539914885 | NULL&M | Disease |
| 11 | 116945074 | rs73576637  | G | A | NULL | 0.539914885 | NULL&M | Disease |
| 11 | 116948173 | rs56188860  | A | T | NULL | 0.539914885 | NULL&M | Disease |
| 11 | 116948761 | rs7108830   | A | G | NULL | 0.539914885 | NULL&M | Disease |
| 11 | 116950278 | rs59752757  | C | A | NULL | 0.539914885 | NULL&M | Disease |
| 11 | 116950567 | rs73576652  | A | G | NULL | 0.539914885 | NULL&M | Disease |
| 11 | 116951615 | rs7121475   | A | G | NULL | 0.539914885 | NULL&M | Disease |
| 11 | 116953604 | rs73576656  | T | C | NULL | 0.539914885 | NULL&M | Disease |
| 11 | 116953784 | rs73576658  | A | G | NULL | 0.539914885 | NULL&M | Disease |
| 11 | 117016450 | rs2306471   | T | C | NULL | 0.539914885 | NULL&M | Disease |
| 11 | 117017455 | rs12419436  | G | T | NULL | 0.539914885 | NULL&M | Disease |
| 11 | 117017530 | rs12420725  | A | G | NULL | 0.539914885 | NULL&M | Disease |
| 11 | 117017714 | rs12417984  | A | G | NULL | 0.539914885 | NULL&M | Disease |
| 11 | 117017762 | rs139864910 | C | A | NULL | 0.539914885 | NULL&M | Disease |
| 11 | 117019867 | rs139146464 | G | A | NULL | 0.539914885 | NULL&M | Disease |
| 11 | 117025932 | rs12418349  | G | A | NULL | 0.539914885 | NULL&M | Disease |
| 11 | 117028727 | rs12420250  | A | G | NULL | 0.539914885 | NULL&M | Disease |
| 11 | 117029785 | rs78166985  | T | A | NULL | 0.539914885 | NULL&M | Disease |
| 11 | 117038741 | rs77171490  | A | T | NULL | 0.539914885 | NULL&M | Disease |
| 11 | 117040505 | rs77678768  | C | G | NULL | 0.539914885 | NULL&M | Disease |
| 11 | 117048122 | rs80353869  | A | G | NULL | 0.539914885 | NULL&M | Disease |
| 11 | 116637677 | rs141740187 | T | G | NULL | 0.539914885 | NULL&M | Disease |
| 11 | 118061798 | rs4553405   | T | C | NULL | 0.541156668 | NULL&M | Disease |
| 11 | 120212377 | rs139034795 | G | A | NULL | 0.539914885 | NULL&M | Disease |
| 11 | 116961510 | rs61244196  | A | G | NULL | 0.539914885 | NULL&M | Disease |
| 11 | 116961617 | rs56125819  | A | G | NULL | 0.539914885 | NULL&M | Disease |
| 11 | 118824683 | rs507763    | C | G | NULL | 0.541156668 | NULL&M | Disease |
| 11 | 120457909 | rs11603180  | A | G | NULL | 0.541156668 | NULL&M | Disease |
| 11 | 120825043 | rs11218079  | T | C | NULL | 0.539914885 | NULL&M | Disease |
| 11 | 120647474 | rs72995856  | C | T | NULL | 0.539914885 | NULL&M | Disease |
| 11 | 117193203 | rs555075    | T | C | NULL | 0.541156668 | NULL&M | Disease |
| 11 | 117614307 | rs10750110  | G | T | NULL | 0.539914885 | NULL&M | Disease |
| 11 | 120462677 | rs17311324  | T | G | NULL | 0.541156668 | NULL&M | Disease |
| 11 | 116852507 | rs4938321   | T | C | NULL | 0.541156668 | NULL&M | Disease |
| 11 | 117501339 | rs6589617   | T | C | NULL | 0.541156668 | NULL&M | Disease |
| 11 | 117741933 | rs61901489  | C | G | NULL | 0.541156668 | NULL&M | Disease |
| 11 | 120036845 | rs528147    | A | G | NULL | 0.541156668 | NULL&M | Disease |
| 11 | 120414641 | rs12575317  | C | T | NULL | 0.541156668 | NULL&M | Disease |
| 11 | 116990851 | rs12366015  | A | G | NULL | 0.542397941 | NULL&M | Disease |
| 11 | 119917798 | rs635335    | T | C | NULL | 0.541156668 | NULL&M | Disease |
| 11 | 119937782 | rs55897720  | G | A | NULL | 0.541156668 | NULL&M | Disease |
| 11 | 116304705 | rs73580446  | T | G | NULL | 0.541156668 | NULL&M | Disease |
| 11 | 117063709 | rs2301174   | G | C | NULL | 0.541156668 | NULL&M | Disease |
| 11 | 117410507 | rs2509006   | T | C | NULL | 0.542397941 | NULL&M | Disease |
| 11 | 117433042 | rs145811313 | A | C | NULL | 0.541156668 | NULL&M | Disease |
| 11 | 119512770 | rs2089648   | A | G | NULL | 0.542397941 | NULL&M | Disease |
| 11 | 119682918 | rs7125270   | T | C | NULL | 0.542397941 | NULL&M | Disease |
| 11 | 119835014 | rs66921644  | A | G | NULL | 0.541156668 | NULL&M | Disease |
| 11 | 117490095 | rs76589374  | T | G | NULL | 0.541156668 | NULL&M | Disease |
| 11 | 117916692 | rs58618446  | T | C | NULL | 0.541156668 | NULL&M | Disease |
| 11 | 117918702 | rs11216730  | T | C | NULL | 0.541156668 | NULL&M | Disease |
| 11 | 121186914 | rs7128664   | G | C | NULL | 0.542397941 | NULL&M | Disease |
| 11 | 116861268 | rs7939934   | T | A | NULL | 0.542397941 | NULL&M | Disease |
| 11 | 116868221 | rs10892054  | T | C | NULL | 0.542397941 | NULL&M | Disease |
| 11 | 116868371 | rs10892055  | A | G | NULL | 0.542397941 | NULL&M | Disease |
| 11 | 117282742 | rs67023719  | T | C | NULL | 0.542397941 | NULL&M | Disease |
| 11 | 120500130 | rs1574249   | A | G | NULL | 0.542397941 | NULL&M | Disease |
| 11 | 116834971 | rs1815788   | C | T | NULL | 0.542397941 | NULL&M | Disease |
| 11 | 118660932 | rs1784295   | A | G | NULL | 0.542397941 | NULL&M | Disease |
| 11 | 118661055 | rs1790188   | T | C | NULL | 0.542397941 | NULL&M | Disease |
| 11 | 120454144 | rs61900900  | T | C | NULL | 0.542397941 | NULL&M | Disease |
| 11 | 119806104 | rs74330115  | A | G | NULL | 0.542397941 | NULL&M | Disease |
| 11 | 116423307 | rs12293155  | G | A | NULL | 0.542397941 | NULL&M | Disease |
| 11 | 118722946 | rs148990923 | T | C | NULL | 0.542397941 | NULL&M | Disease |
| 11 | 119923914 | rs142100881 | G | A | NULL | 0.542397941 | NULL&M | Disease |
| 11 | 120641004 | rs10502242  | G | A | NULL | 0.542397941 | NULL&M | Disease |

|    |           |             |   |   |       |           |           |        |          |
|----|-----------|-------------|---|---|-------|-----------|-----------|--------|----------|
| 11 | 120824692 | rs11218078  | G | T | 0.941 | -7977.388 | -7977.704 | -0.316 | 2.82E-06 |
| 11 | 121011823 | rs594951    | C | T | 0.948 | -7977.388 | -7977.704 | -0.316 | 2.82E-06 |
| 11 | 117410428 | rs2509005   | A | G | 1.053 | -7977.388 | -7977.705 | -0.317 | 2.82E-06 |
| 11 | 117482186 | rs184607052 | G | A | 0.915 | -7977.388 | -7977.707 | -0.318 | 2.81E-06 |
| 11 | 116899414 | rs73594168  | T | C | 0.915 | -7977.388 | -7977.707 | -0.319 | 2.81E-06 |
| 11 | 116899617 | rs73594169  | T | C | 0.915 | -7977.388 | -7977.707 | -0.319 | 2.81E-06 |
| 11 | 119732432 | rs475159    | T | G | 1.081 | -7977.388 | -7977.708 | -0.319 | 2.81E-06 |
| 11 | 116804144 | rs7107702   | C | T | 1.061 | -7977.388 | -7977.708 | -0.32  | 2.81E-06 |
| 11 | 116972339 | rs78459638  | A | G | 0.915 | -7977.388 | -7977.708 | -0.32  | 2.81E-06 |
| 11 | 117031363 | rs142017584 | A | G | 1.083 | -7977.388 | -7977.708 | -0.32  | 2.81E-06 |
| 11 | 117039461 | rs116773440 | C | A | 1.083 | -7977.388 | -7977.708 | -0.32  | 2.81E-06 |
| 11 | 119214292 | rs1893176   | G | A | 1.054 | -7977.388 | -7977.709 | -0.32  | 2.81E-06 |
| 11 | 120572361 | rs61901371  | A | G | 0.933 | -7977.388 | -7977.711 | -0.323 | 2.80E-06 |
| 11 | 116660768 | rs34089864  | A | G | 0.915 | -7977.388 | -7977.712 | -0.324 | 2.80E-06 |
| 11 | 118014873 | rs112525313 | T | C | 1.077 | -7977.388 | -7977.714 | -0.325 | 2.79E-06 |
| 11 | 119539324 | rs4938705   | A | G | 0.949 | -7977.388 | -7977.713 | -0.325 | 2.79E-06 |
| 11 | 120445835 | rs4500499   | A | G | 1.054 | -7977.388 | -7977.714 | -0.326 | 2.79E-06 |
| 11 | 117408179 | rs661631    | T | C | 1.053 | -7977.388 | -7977.715 | -0.327 | 2.79E-06 |
| 11 | 119881097 | rs2848729   | T | C | 0.933 | -7977.388 | -7977.716 | -0.327 | 2.79E-06 |
| 11 | 117351433 | rs553370    | G | A | 0.933 | -7977.388 | -7977.716 | -0.328 | 2.79E-06 |
| 11 | 117797120 | rs73022498  | C | T | 0.931 | -7977.388 | -7977.716 | -0.328 | 2.79E-06 |
| 11 | 116197556 | rs7932598   | T | G | 1.066 | -7977.388 | -7977.718 | -0.329 | 2.78E-06 |
| 11 | 116700775 | rs12721090  | T | C | 1.09  | -7977.388 | -7977.718 | -0.329 | 2.78E-06 |
| 11 | 119795133 | rs576764    | G | A | 0.945 | -7977.388 | -7977.717 | -0.329 | 2.78E-06 |
| 11 | 116931087 | rs111426457 | G | C | 0.916 | -7977.388 | -7977.718 | -0.33  | 2.78E-06 |
| 11 | 116934869 | rs7946101   | A | G | 0.916 | -7977.388 | -7977.718 | -0.33  | 2.78E-06 |
| 11 | 116936488 | rs1982679   | A | G | 0.916 | -7977.388 | -7977.718 | -0.33  | 2.78E-06 |
| 11 | 116939724 | rs10502225  | T | A | 0.916 | -7977.388 | -7977.718 | -0.33  | 2.78E-06 |
| 11 | 116941382 | rs111641976 | A | G | 0.916 | -7977.388 | -7977.718 | -0.33  | 2.78E-06 |
| 11 | 116942479 | rs57787606  | A | G | 0.916 | -7977.388 | -7977.718 | -0.33  | 2.78E-06 |
| 11 | 116944304 | rs73576634  | T | G | 0.916 | -7977.388 | -7977.718 | -0.33  | 2.78E-06 |
| 11 | 116945074 | rs73576637  | G | A | 0.916 | -7977.388 | -7977.718 | -0.33  | 2.78E-06 |
| 11 | 116948173 | rs56188860  | A | T | 0.916 | -7977.388 | -7977.718 | -0.33  | 2.78E-06 |
| 11 | 116948761 | rs7108830   | A | G | 0.916 | -7977.388 | -7977.718 | -0.33  | 2.78E-06 |
| 11 | 116950278 | rs59752757  | C | A | 0.916 | -7977.388 | -7977.718 | -0.33  | 2.78E-06 |
| 11 | 116950567 | rs73576652  | A | G | 0.916 | -7977.388 | -7977.718 | -0.33  | 2.78E-06 |
| 11 | 116951615 | rs7121475   | A | G | 0.916 | -7977.388 | -7977.718 | -0.33  | 2.78E-06 |

|    |           |              |   |   |      |             |        |         |
|----|-----------|--------------|---|---|------|-------------|--------|---------|
| 11 | 120642631 | rs72995844   | G | A | NULL | 0.542397941 | NULL&M | Disease |
| 11 | 120642698 | rs17124301   | C | T | NULL | 0.542397941 | NULL&M | Disease |
| 11 | 117023706 | rs143494314  | T | C | NULL | 0.542397941 | NULL&M | Disease |
| 11 | 117035016 | rs150984554  | A | G | NULL | 0.542397941 | NULL&M | Disease |
| 11 | 118550522 | rs2277296    | C | T | NULL | 0.543638687 | NULL&M | Disease |
| 11 | 118550524 | rs201134460  | T | C | NULL | 0.543638687 | NULL&M | Disease |
| 11 | 116949853 | rs59839888   | C | T | NULL | 0.542397941 | NULL&M | Disease |
| 11 | 117015238 | rs1001556897 | A | C | NULL | 0.542397941 | NULL&M | Disease |
| 11 | 117488010 | rs145749713  | A | G | NULL | 0.542397941 | NULL&M | Disease |
| 11 | 119733183 | rs112201912  | A | G | NULL | 0.543638687 | NULL&M | Disease |
| 11 | 120463065 | rs1573789    | T | C | NULL | 0.543638687 | NULL&M | Disease |
| 11 | 120500604 | rs7936516    | T | G | NULL | 0.543638687 | NULL&M | Disease |
| 11 | 120083118 | rs72645479   | C | T | NULL | 0.543638687 | NULL&M | Disease |
| 11 | 117059794 | rs7933134    | C | G | NULL | 0.543638687 | NULL&M | Disease |
| 11 | 119544722 | rs113300825  | T | C | NULL | 0.542397941 | NULL&M | Disease |
| 11 | 116734688 | rs557331     | A | G | NULL | 0.542397941 | NULL&M | Disease |
| 11 | 117906061 | rs77084900   | C | T | NULL | 0.543638687 | NULL&M | Disease |
| 11 | 117058062 | rs2306472    | T | C | NULL | 0.543638687 | NULL&M | Disease |
| 11 | 117594591 | rs4938436    | G | A | NULL | 0.543638687 | NULL&M | Disease |
| 11 | 117924155 | rs79944284   | A | G | NULL | 0.543638687 | NULL&M | Disease |
| 11 | 117344866 | rs79297003   | T | C | NULL | 0.543638687 | NULL&M | Disease |
| 11 | 117345114 | rs114005593  | C | G | NULL | 0.543638687 | NULL&M | Disease |
| 11 | 119935735 | rs11217667   | A | C | NULL | 0.543638687 | NULL&M | Disease |
| 11 | 120632841 | rs11824814   | T | A | NULL | 0.543638687 | NULL&M | Disease |
| 11 | 120792086 | rs61588877   | G | A | NULL | 0.543638687 | NULL&M | Disease |
| 11 | 117912267 | rs11216726   | T | C | NULL | 0.543638687 | NULL&M | Disease |
| 11 | 119804760 | rs139886195  | A | C | NULL | 0.543638687 | NULL&M | Disease |
| 11 | 120565293 | rs76003278   | C | T | NULL | 0.543638687 | NULL&M | Disease |
| 11 | 120565473 | rs74482798   | G | C | NULL | 0.543638687 | NULL&M | Disease |
| 11 | 116501409 | rs1944154    | C | T | NULL | 0.544878892 | NULL&M | Disease |
| 11 | 119808535 | rs2006623    | A | G | NULL | 0.544878892 | NULL&M | Disease |
| 11 | 117191734 | rs1784045    | C | T | NULL | 0.544878892 | NULL&M | Disease |
| 11 | 117329415 | rs520328     | A | G | NULL | 0.544878892 | NULL&M | Disease |
| 11 | 119029058 | rs192734017  | A | G | NULL | 0.543638687 | NULL&M | Disease |
| 11 | 119499747 | rs145993550  | A | G | NULL | 0.544878892 | NULL&M | Disease |
| 11 | 117053433 | rs2046150    | A | C | NULL | 0.544878892 | NULL&M | Disease |
| 11 | 119674611 | rs4938725    | G | A | NULL | 0.544878892 | NULL&M | Disease |
| 11 | 116325615 | rs147834459  | T | C | NULL | 0.543638687 | NULL&M | Disease |
| 11 | 121079478 | rs1231418    | C | G | NULL | 0.544878892 | NULL&M | Disease |
| 11 | 118590743 | rs503542     | G | A | NULL | 0.544878892 | NULL&M | Disease |
| 11 | 120847827 | rs78474864   | A | G | NULL | 0.544878892 | NULL&M | Disease |
| 11 | 120853577 | rs646543     | C | T | NULL | 0.544878892 | NULL&M | Disease |
| 11 | 117907713 | rs12223876   | A | T | NULL | 0.544878892 | NULL&M | Disease |
| 11 | 117908922 | rs11216718   | A | G | NULL | 0.544878892 | NULL&M | Disease |
| 11 | 117908985 | rs11216719   | C | A | NULL | 0.544878892 | NULL&M | Disease |
| 11 | 117909101 | rs11216720   | T | C | NULL | 0.544878892 | NULL&M | Disease |
| 11 | 117909531 | rs11216721   | T | C | NULL | 0.544878892 | NULL&M | Disease |
| 11 | 117910017 | rs12223165   | A | G | NULL | 0.544878892 | NULL&M | Disease |
| 11 | 117910116 | rs12223183   | A | G | NULL | 0.544878892 | NULL&M | Disease |
| 11 | 117910244 | rs11216722   | A | G | NULL | 0.544878892 | NULL&M | Disease |
| 11 | 117911450 | rs11216725   | T | C | NULL | 0.544878892 | NULL&M | Disease |
| 11 | 118540104 | rs506234     | G | C | NULL | 0.546118541 | NULL&M | Disease |
| 11 | 118556398 | rs11216943   | A | G | NULL | 0.546118541 | NULL&M | Disease |
| 11 | 119935489 | rs60708230   | A | G | NULL | 0.544878892 | NULL&M | Disease |
| 11 | 120632745 | rs11820186   | A | G | NULL | 0.544878892 | NULL&M | Disease |
| 11 | 118713180 | rs2187490    | G | T | NULL | 0.546118541 | NULL&M | Disease |
| 11 | 119766827 | rs78540725   | C | A | NULL | 0.544878892 | NULL&M | Disease |
| 11 | 120843834 | rs601817     | C | T | NULL | 0.546118541 | NULL&M | Disease |
| 11 | 116225239 | rs12576376   | T | C | NULL | 0.544878892 | NULL&M | Disease |
| 11 | 116752558 | rs634044     | C | T | NULL | 0.546118541 | NULL&M | Disease |
| 11 | 120570587 | rs12280296   | G | A | NULL | 0.546118541 | NULL&M | Disease |
| 11 | 116781545 | rs11216183   | A | C | NULL | 0.546118541 | NULL&M | Disease |
| 11 | 117384372 | rs144199381  | T | C | NULL | 0.544878892 | NULL&M | Disease |
| 11 | 119906741 | rs582545     | G | C | NULL | 0.546118541 | NULL&M | Disease |
| 11 | 119907628 | rs643377     | A | G | NULL | 0.546118541 | NULL&M | Disease |
| 11 | 120699899 | rs4936555    | T | C | NULL | 0.546118541 | NULL&M | Disease |
| 11 | 120835281 | rs7128009    | A | G | NULL | 0.546118541 | NULL&M | Disease |
| 11 | 119880923 | rs675714     | A | G | NULL | 0.546118541 | NULL&M | Disease |
| 11 | 117164246 | rs45506400   | C | A | NULL | 0.546118541 | NULL&M | Disease |
| 11 | 117218685 | rs555179364  | C | T | NULL | 0.544878892 | NULL&M | Disease |
| 11 | 117921563 | rs76190886   | T | C | NULL | 0.546118541 | NULL&M | Disease |
| 11 | 118059557 | rs10790244   | C | T | NULL | 0.546118541 | NULL&M | Disease |
| 11 | 119236410 | rs35310980   | A | T | NULL | 0.546118541 | NULL&M | Disease |
| 11 | 120648746 | rs115791680  | T | C | NULL | 0.546118541 | NULL&M | Disease |
| 11 | 120862089 | rs4935758    | T | C | NULL | 0.546118541 | NULL&M | Disease |
| 11 | 116700785 | rs11827682   | T | C | NULL | 0.546118541 | NULL&M | Disease |
| 11 | 118865465 | rs4938616    | T | C | NULL | 0.546118541 | NULL&M | Disease |
| 11 | 116292818 | rs116859176  | C | T | NULL | 0.544878892 | NULL&M | Disease |
| 11 | 117764401 | rs112444974  | T | G | NULL | 0.546118541 | NULL&M | Disease |
| 11 | 117250419 | rs180865175  | G | T | NULL | 0.546118541 | NULL&M | Disease |
| 11 | 116429779 | rs61904803   | C | T | NULL | 0.547357618 | NULL&M | Disease |
| 11 | 116959601 | rs56257632   | C | T | NULL | 0.546118541 | NULL&M | Disease |
| 11 | 117297415 | rs7940638    | A | C | NULL | 0.547357618 | NULL&M | Disease |
| 11 | 117481112 | rs78503991   | T | A | NULL | 0.547357618 | NULL&M | Disease |
| 11 | 117647364 | rs13377544   | A | T | NULL | 0.547357618 | NULL&M | Disease |
| 11 | 119515905 | rs11217369   | T | C | NULL | 0.547357618 | NULL&M | Disease |
| 11 | 119516100 | rs10892425   | T | C | NULL | 0.547357618 | NULL&M | Disease |
| 11 | 118655704 | rs6421568    | C | G | NULL | 0.547357618 | NULL&M | Disease |
| 11 | 118655775 | rs6421569    | A | C | NULL | 0.547357618 | NULL&M | Disease |
| 11 | 118037964 | rs2075647    | C | G | NULL | 0.546118541 | NULL&M | Disease |
| 11 | 120531656 | rs11217941   | G | T | NULL | 0.547357618 | NULL&M | Disease |
| 11 | 117341717 | rs56316258   | C | G | NULL | 0.547357618 | NULL&M | Disease |
| 11 | 117518200 | rs673028     | G | A | NULL | 0.547357618 | NULL&M | Disease |
| 11 | 117600876 | rs4936402    | C | T | NULL | 0.546118541 | NULL&M | Disease |
| 11 | 116778180 | rs1979023    | C | T | NULL | 0.547357618 | NULL&M | Disease |
| 11 | 117578142 | rs77699630   | C | T | NULL | 0.547357618 | NULL&M | Disease |

|    |           |              |   |   |       |           |           |        |          |
|----|-----------|--------------|---|---|-------|-----------|-----------|--------|----------|
| 11 | 120642631 | rs72995844   | G | A | 0.917 | -7977.388 | -7977.736 | -0.347 | 2.73E-06 |
| 11 | 120642698 | rs17124301   | C | T | 0.917 | -7977.388 | -7977.736 | -0.347 | 2.73E-06 |
| 11 | 117023706 | rs143494314  | T | C | 1.082 | -7977.388 | -7977.737 | -0.348 | 2.73E-06 |
| 11 | 117035016 | rs150984554  | A | G | 1.082 | -7977.388 | -7977.737 | -0.348 | 2.73E-06 |
| 11 | 118550522 | rs2277296    | C | T | 1.059 | -7977.388 | -7977.737 | -0.348 | 2.73E-06 |
| 11 | 118550524 | rs201134460  | T | C | 1.059 | -7977.388 | -7977.737 | -0.348 | 2.73E-06 |
| 11 | 116949853 | rs59839888   | C | T | 0.917 | -7977.388 | -7977.738 | -0.349 | 2.73E-06 |
| 11 | 117015238 | rs1001556897 | A | C | 1.082 | -7977.388 | -7977.738 | -0.349 | 2.73E-06 |
| 11 | 117488010 | rs145749713  | A | G | 0.917 | -7977.388 | -7977.737 | -0.349 | 2.73E-06 |
| 11 | 119733183 | rs112201912  | A | G | 1.069 | -7977.388 | -7977.738 | -0.349 | 2.73E-06 |
| 11 | 120463065 | rs1573789    | T | C | 1.053 | -7977.388 | -7977.738 | -0.35  | 2.73E-06 |
| 11 | 120500604 | rs7936516    | T | G | 0.95  | -7977.388 | -7977.738 | -0.35  | 2.73E-06 |
| 11 | 120083118 | rs72645479   | C | T | 0.926 | -7977.388 | -7977.739 | -0.351 | 2.72E-06 |
| 11 | 117059794 | rs7933134    | C | G | 1.081 | -7977.388 | -7977.741 | -0.353 | 2.72E-06 |
| 11 | 119544722 | rs113300825  | T | C | 1.089 | -7977.388 | -7977.741 | -0.353 | 2.72E-06 |
| 11 | 116734688 | rs557331     | A | G | 0.918 | -7977.388 | -7977.742 | -0.354 | 2.71E-06 |
| 11 | 117906061 | rs77084900   | C | T | 0.917 | -7977.388 | -7977.743 | -0.354 | 2.71E-06 |
| 11 | 117058062 | rs2306472    | T | C | 1.081 | -7977.388 | -7977.744 | -0.356 | 2.71E-06 |
| 11 | 117594591 | rs4938436    | G | A | 0.919 | -7977.388 | -7977.744 | -0.356 | 2.71E-06 |
| 11 | 117924155 | rs79944284   | A | G | 0.917 | -7977.388 | -7977.744 | -0.356 | 2.71E-06 |
| 11 | 117344866 | rs79297003   | T | C | 1.088 | -7977.388 | -7977.745 | -0.357 | 2.71E-06 |
| 11 | 117345114 | rs114005593  | C | G | 1.088 | -7977.388 | -7977.745 | -0.357 | 2.71E-06 |
| 11 | 119935735 | rs11217667   | A | C | 1.066 | -7977.388 | -7977.745 | -0.357 | 2.71E-06 |
| 11 | 120632841 | rs11824814   | T | A | 0.918 | -7977.388 | -7977.745 | -0.357 | 2.71E-06 |
| 11 | 120792086 | rs61588877   | G | A | 1.085 | -7977.388 | -7977.746 | -0.358 | 2.70E-06 |
| 11 | 117912267 | rs11216726   | T | C | 0.918 | -7977.388 | -7977.748 | -0.359 | 2.70E-06 |
| 11 | 119804760 | rs139886195  | A | C | 1.088 | -7977.388 | -7977.749 | -0.361 | 2.70E-06 |
| 11 | 120565293 | rs76003278   | C | T | 1.078 | -7977.388 | -7977.749 | -0.361 | 2.70E-06 |
| 11 | 120565473 | rs74482798   | G | C | 1.078 | -7977.388 | -7977.749 | -0.361 | 2.70E-06 |
| 11 | 116501409 | rs1944154    | C | T | 0.935 | -7977.388 | -7977.75  | -0.362 | 2.69E-06 |
| 11 | 119808535 | rs2006623    | A | G | 1.056 | -7977.388 | -7977.75  | -0.362 | 2.69E-06 |
| 11 | 117191734 | rs1784045    | C | T | 1.053 | -7977.388 | -7977.751 | -0.363 | 2.69E-06 |
| 11 | 117329415 | rs520328     | A | G | 0.936 | -7977.388 | -7977.752 | -0.364 | 2.69E-06 |
| 11 | 119029058 | rs192734017  | A | G | 1.084 | -7977.388 | -7977.753 | -0.364 | 2.69E-06 |
| 11 | 119499747 | rs145993550  | A | G | 0.918 | -7977.388 | -7977.752 | -0.364 | 2.69E-06 |
| 11 | 117053433 | rs2046150    | A | C | 1.081 | -7977.388 | -7977.753 | -0.365 | 2.69E-06 |
| 11 | 119674611 | rs4938725    | G | A | 0.95  | -7977.388 | -7977.753 | -0.365 | 2.69E-06 |
| 11 | 116325615 | rs17834459   | T | C | 0.921 | -7977.388 | -7977.754 | -0.366 | 2.68E-06 |
| 11 | 121079478 | rs1231418    | C | G | 0.946 | -7977.388 | -7977.754 | -0.366 | 2.68E-06 |
| 11 | 118590743 | rs503542     | G | A | 0.95  | -7977.388 | -7977.756 | -0.367 | 2.68E-06 |
| 11 | 120847827 | rs78474864   | A | G | 1.078 | -7977.388 | -7977.756 | -0.367 | 2.68E-06 |
| 11 | 120835377 | rs646543     | C | T | 0.944 | -7977.388 | -7977.755 | -0.367 | 2.68E-06 |
| 11 | 117907713 | rs112223876  | A | T | 0.918 | -7977.388 | -7977.756 | -0.368 | 2.68E-06 |
| 11 | 117908922 | rs11216718   | A | G | 0.918 | -7977.388 | -7977.756 | -0.368 | 2.68E-06 |
| 11 | 117908985 | rs11216719   | C | A | 0.918 | -7977.388 | -7977.756 | -0.368 | 2.68E-06 |
| 11 | 117909101 | rs11216720   | T | C | 0.918 | -7977.388 | -7977.756 | -0.368 | 2.68E-06 |
| 11 | 117909531 | rs11216712   | T | C | 0.918 | -7977.388 | -7977.756 | -0.368 | 2.68E-06 |
| 11 | 117910017 | rs12223165   | A | G | 0.918 | -7977.388 | -7977.756 | -0.368 | 2.68E-06 |
| 11 | 117910116 | rs12223183   | A | G | 0.918 | -7977.388 | -7977.756 | -0.368 | 2.68E-06 |
| 11 | 117910244 | rs11216722   | A | G | 0.918 | -7977.388 | -7977.756 | -0.368 | 2.68E-06 |
| 11 | 117911450 | rs11216725   | T | C | 0.918 | -7977.388 | -7977.756 | -0.368 | 2.68E-06 |
| 11 | 118540104 | rs506234     | G | C | 0.95  | -7977.388 | -7977.756 | -0.368 | 2.68E-06 |
| 11 | 118556398 | rs11216943   | A | G | 1.059 | -7977.388 | -7977.756 | -0.368 | 2.68E-06 |
| 11 | 119935489 | rs60708230   | A | G | 1.066 | -7977.388 | -7977.756 | -0.368 | 2.68E-06 |
| 11 | 120632745 | rs11820186   | A | G | 0.918 | -7977.388 | -7977.756 | -0.368 | 2.68E-06 |
| 11 | 118713180 | rs2187490    | G | T | 0.931 | -7977.388 | -7977.758 | -0.369 | 2.67E-06 |
| 11 | 119766827 | rs78540725   | C | A | 0.921 | -7977.388 | -7977.757 | -0.369 | 2.67E-06 |
| 11 | 120843834 | rs601817     | C | T | 0.944 | -7977.388 | -7977.758 | -0.369 | 2.67E-06 |
| 11 | 116225239 | rs12576376   | C | C | 0.925 | -7977.388 | -7977.758 | -0.37  | 2.67E-06 |
| 11 | 116752558 | rs6430044    | C | T | 1.06  | -7977.388 | -7977.758 | -0.37  | 2.67E-06 |
| 11 | 120570587 | rs12280296   | G | A | 0.935 | -7977.388 | -7977.759 | -0.37  | 2.67E-06 |
| 11 | 116781545 | rs11216183   | A | C | 1.073 | -7977.388 | -7977.759 | -0.371 | 2.67E-06 |
| 11 | 117384372 | rs144199381  | T | C | 0.919 | -7977.388 | -7977.761 | -0.372 | 2.67E-06 |
| 11 | 119906741 | rs582545     | G | C | 0.924 | -7977.388 | -7977.761 | -0.372 | 2.67E-06 |
| 11 | 119907628 | rs643377     | A | G | 0.924 | -7977.388 | -7977.76  | -0.372 | 2.67E-06 |
| 11 | 120699859 | rs4936555    | T | C | 1.054 | -7977.388 | -7977.76  | -0.372 | 2.67E-06 |
| 11 | 120835281 | rs7128009    | A | G | 0.943 | -7977.388 | -7977.76  | -0.372 | 2.67E-06 |
| 11 | 119880923 | rs675714     | A | G | 0.935 | -7977.388 | -7977.761 | -0.373 | 2.66E-06 |
| 11 | 117164246 | rs45506400   | C | A | 0.922 | -7977.388 | -7977.762 | -0.374 | 2.66E-06 |
| 11 | 117218685 | rs555179364  | C | T | 0.921 | -7977.388 | -7977.763 | -0.374 | 2.66E-06 |
| 11 | 117921563 | rs76190886   | T | C | 0.919 | -7977.388 | -7977.763 | -0.374 | 2.66E-06 |
| 11 | 118059557 | rs7190244    | C | T | 1.058 | -7977.388 | -7977.762 | -0.374 | 2.66E-06 |
| 11 | 119236410 | rs35310980   | A | T | 0.93  | -7977.388 | -7977.762 | -0.374 | 2.66E-06 |
| 11 | 120648746 | rs115791680  | T | C | 0.92  | -7977.388 | -7977.762 | -0.374 | 2.66E-06 |
| 11 | 120862089 | rs4935758    | T | C | 1.053 | -7977.388 | -7977.763 | -0.374 | 2.66E-06 |
| 11 | 116700785 | rs11827682   | T | C | 1.086 | -7977.388 | -7977.764 | -0.375 | 2.66E-06 |
| 11 | 118865465 | rs4938616    | T | C | 1.053 | -7977.388 | -7977.763 | -0.375 | 2.66E-06 |
| 11 | 116292818 | rs116859176  | C | T | 0.926 | -7977.388 | -7977.764 | -0.376 | 2.66E-06 |
| 11 | 117764401 | rs112444974  | T | G | 1.086 | -7977.388 | -7977.764 | -0.376 | 2.66E-06 |
| 11 | 117250419 | rs180865175  | G | T | 0.921 | -7977.388 | -7977.765 | -0.377 | 2.65E-06 |
| 11 | 116429779 | rs61904803   | C | T | 1.063 | -7977.388 | -7977.768 | -0.38  | 2.65E-06 |
| 11 | 116959601 | rs56257632   | C | T | 0.92  | -7977.388 | -7977.768 | -0.38  | 2.65E-06 |
| 11 | 117297415 | rs7940638    | A | C | 0.94  | -7977.388 | -7977.768 | -0.38  | 2.65E-06 |
| 11 | 117481112 | rs78503991   | T | A | 0.92  | -7977.388 | -7977.768 | -0.38  | 2.65E-06 |
| 11 | 117647364 | rs13377544   | A | T | 1.074 | -7977.388 | -7977.768 | -0.38  | 2.65E-06 |
| 11 | 119515905 | rs11217369   | T | C | 0.929 | -7977.388 | -7977.768 | -0.38  | 2.65E-06 |
| 11 | 119516100 | rs10892425   | T | C | 0.929 | -7977.388 | -7977.768 | -0.38  | 2.65E-06 |
| 11 | 118655704 | rs6421568    | C | G | 0.937 | -7977.388 | -7977.769 | -0.381 | 2.64E-06 |
| 11 | 118655757 | rs6421569    | A | C | 0.937 | -7977.388 | -7977.769 | -0.381 | 2.64E-06 |
| 11 | 118037964 | rs2075647    | G | C | 0.921 | -7977.388 | -7977.771 | -0.382 | 2.64E-06 |
| 11 | 120531656 | rs11217941   | G | T | 1.052 | -7977.388 | -7977.77  | -0.382 | 2.64E-06 |
| 11 | 117341717 | rs56316258   | G | C | 1.069 | -7977.388 | -7977.771 | -0.383 | 2.64E-06 |
| 11 | 117518200 | rs673028     | G | A | 0.948 | -7977.388 | -7977.773 | -0.384 | 2.63E-06 |
| 11 | 117600876 | rs4936402    | C | T | 0.922 | -7977.388 | -7977.772 | -0.384 | 2.63E-06 |
| 11 | 116778180 | rs1979023    | C | T | 0.92  | -7977.388 | -7977.773 | -0.385 | 2.63E-06 |
| 11 | 117578142 | rs7699630    | C | T | 0.92  | -7977.388 | -7977.773 | -0.385 | 2.63E-06 |

|    |           |             |   |   |      |             |        |         |
|----|-----------|-------------|---|---|------|-------------|--------|---------|
| 11 | 117923742 | rs74235117  | T | C | NULL | 0.547357618 | NULL&M | Disease |
| 11 | 118563286 | rs527619    | A | G | NULL | 0.547357618 | NULL&M | Disease |
| 11 | 116800154 | rs547919    | T | A | NULL | 0.547357618 | NULL&M | Disease |
| 11 | 119909507 | rs688857    | T | C | NULL | 0.547357618 | NULL&M | Disease |
| 11 | 117796722 | rs7107023   | T | C | NULL | 0.547357618 | NULL&M | Disease |
| 11 | 116834953 | rs1815789   | C | T | NULL | 0.548596109 | NULL&M | Disease |
| 11 | 116838904 | rs7941927   | G | A | NULL | 0.548596109 | NULL&M | Disease |
| 11 | 116911784 | rs61582023  | G | A | NULL | 0.547357618 | NULL&M | Disease |
| 11 | 117316605 | rs60385993  | A | G | NULL | 0.546118541 | NULL&M | Disease |
| 11 | 117317947 | rs111446534 | A | C | NULL | 0.546118541 | NULL&M | Disease |
| 11 | 118652781 | rs2508915   | C | G | NULL | 0.548596109 | NULL&M | Disease |
| 11 | 118777978 | rs78755429  | A | C | NULL | 0.547357618 | NULL&M | Disease |
| 11 | 120836662 | rs524209    | A | G | NULL | 0.548596109 | NULL&M | Disease |
| 11 | 118117018 | rs11216831  | A | G | NULL | 0.548596109 | NULL&M | Disease |
| 11 | 116498649 | rs61906060  | G | A | NULL | 0.548596109 | NULL&M | Disease |
| 11 | 117899803 | rs617357    | A | G | NULL | 0.548596109 | NULL&M | Disease |
| 11 | 119516473 | rs10892426  | T | C | NULL | 0.548596109 | NULL&M | Disease |
| 11 | 119808052 | rs1955021   | A | G | NULL | 0.548596109 | NULL&M | Disease |
| 11 | 120916015 | rs141784177 | G | C | NULL | 0.547357618 | NULL&M | Disease |
| 11 | 119539364 | rs4938706   | A | G | NULL | 0.548596109 | NULL&M | Disease |
| 11 | 117561265 | rs10892162  | G | A | NULL | 0.548596109 | NULL&M | Disease |
| 11 | 117605574 | rs1939982   | G | A | NULL | 0.547357618 | NULL&M | Disease |
| 11 | 116548489 | rs112548685 | T | C | NULL | 0.547357618 | NULL&M | Disease |
| 11 | 119541778 | rs4459318   | T | C | NULL | 0.548596109 | NULL&M | Disease |
| 11 | 119781153 | rs7115603   | G | A | NULL | 0.548596109 | NULL&M | Disease |
| 11 | 119914788 | rs11217655  | C | A | NULL | 0.548596109 | NULL&M | Disease |
| 11 | 118648396 | rs548167    | A | G | NULL | 0.548596109 | NULL&M | Disease |
| 11 | 120790814 | rs75736746  | G | A | NULL | 0.548596109 | NULL&M | Disease |
| 11 | 118572267 | rs573905    | A | G | NULL | 0.549833997 | NULL&M | Disease |
| 11 | 118834322 | rs118003247 | G | A | NULL | 0.548596109 | NULL&M | Disease |
| 11 | 120417065 | rs2252490   | C | G | NULL | 0.549833997 | NULL&M | Disease |
| 11 | 117532692 | rs12789293  | T | C | NULL | 0.548596109 | NULL&M | Disease |
| 11 | 119936507 | rs1893393   | A | T | NULL | 0.549833997 | NULL&M | Disease |
| 11 | 117678420 | rs11216551  | A | G | NULL | 0.548596109 | NULL&M | Disease |
| 11 | 117678543 | rs12790243  | A | G | NULL | 0.549833997 | NULL&M | Disease |
| 11 | 116572169 | rs71480317  | C | T | NULL | 0.548596109 | NULL&M | Disease |
| 11 | 116917885 | rs73576603  | A | G | NULL | 0.548596109 | NULL&M | Disease |
| 11 | 117416908 | rs521187    | A | G | NULL | 0.549833997 | NULL&M | Disease |
| 11 | 117569931 | rs56359135  | T | A | NULL | 0.549833997 | NULL&M | Disease |
| 11 | 119804640 | rs80030349  | G | A | NULL | 0.549833997 | NULL&M | Disease |
| 11 | 119886445 | rs72996698  | T | C | NULL | 0.548596109 | NULL&M | Disease |
| 11 | 120563386 | rs77776594  | A | G | NULL | 0.549833997 | NULL&M | Disease |
| 11 | 120822377 | rs3781817   | T | C | NULL | 0.549833997 | NULL&M | Disease |
| 11 | 121165007 | rs118088243 | G | A | NULL | 0.548596109 | NULL&M | Disease |
| 11 | 116440011 | rs4938285   | C | T | NULL | 0.549833997 | NULL&M | Disease |
| 11 | 120332795 | rs117843905 | T | C | NULL | 0.549833997 | NULL&M | Disease |
| 11 | 116223240 | rs36088800  | C | T | NULL | 0.549833997 | NULL&M | Disease |
| 11 | 116957263 | rs3863307   | G | C | NULL | 0.549833997 | NULL&M | Disease |
| 11 | 117342348 | rs66991573  | C | A | NULL | 0.549833997 | NULL&M | Disease |
| 11 | 116996445 | rs80125068  | G | A | NULL | 0.549833997 | NULL&M | Disease |
| 11 | 117397094 | rs143648302 | T | C | NULL | 0.549833997 | NULL&M | Disease |
| 11 | 117623674 | rs80183540  | T | C | NULL | 0.549833997 | NULL&M | Disease |
| 11 | 117679078 | rs60657131  | C | T | NULL | 0.548596109 | NULL&M | Disease |
| 11 | 119515046 | rs10892424  | T | G | NULL | 0.549833997 | NULL&M | Disease |
| 11 | 120415557 | rs2252648   | C | A | NULL | 0.549833997 | NULL&M | Disease |
| 11 | 119634544 | rs80238987  | A | G | NULL | 0.549833997 | NULL&M | Disease |
| 11 | 120452999 | rs4938818   | A | G | NULL | 0.549833997 | NULL&M | Disease |
| 11 | 120871636 | rs144716047 | G | C | NULL | 0.549833997 | NULL&M | Disease |
| 11 | 117410700 | rs2509007   | A | G | NULL | 0.551071269 | NULL&M | Disease |
| 11 | 121072088 | rs688099    | A | C | NULL | 0.551071269 | NULL&M | Disease |
| 11 | 116740659 | rs599320    | C | G | NULL | 0.549833997 | NULL&M | Disease |
| 11 | 117056059 | rs11606672  | T | C | NULL | 0.549833997 | NULL&M | Disease |
| 11 | 120567135 | rs75432677  | A | G | NULL | 0.548596109 | NULL&M | Disease |
| 11 | 117766665 | rs113650932 | T | C | NULL | 0.549833997 | NULL&M | Disease |
| 11 | 116439949 | rs4938284   | C | T | NULL | 0.551071269 | NULL&M | Disease |
| 11 | 116792445 | rs522848    | C | T | NULL | 0.549833997 | NULL&M | Disease |
| 11 | 121094594 | rs639891    | T | C | NULL | 0.551071269 | NULL&M | Disease |
| 11 | 116224822 | rs12577176  | C | T | NULL | 0.551071269 | NULL&M | Disease |
| 11 | 117798073 | rs73022500  | A | C | NULL | 0.551071269 | NULL&M | Disease |
| 11 | 117798431 | rs12365956  | A | G | NULL | 0.551071269 | NULL&M | Disease |
| 11 | 117953403 | rs639978    | G | A | NULL | 0.549833997 | NULL&M | Disease |
| 11 | 119486336 | rs75538174  | C | A | NULL | 0.551071269 | NULL&M | Disease |
| 11 | 120149184 | rs77802172  | A | G | NULL | 0.549833997 | NULL&M | Disease |
| 11 | 116693354 | rs5093      | A | G | NULL | 0.549833997 | NULL&M | Disease |
| 11 | 116958028 | rs7103842   | A | G | NULL | 0.551071269 | NULL&M | Disease |
| 11 | 116744447 | rs1263160   | C | T | NULL | 0.549833997 | NULL&M | Disease |
| 11 | 119540470 | rs7118532   | G | A | NULL | 0.551071269 | NULL&M | Disease |
| 11 | 117411687 | rs147864821 | A | G | NULL | 0.549833997 | NULL&M | Disease |
| 11 | 119817902 | rs55831600  | A | G | NULL | 0.551071269 | NULL&M | Disease |
| 11 | 117771769 | rs73020470  | C | T | NULL | 0.551071269 | NULL&M | Disease |
| 11 | 117991116 | rs34570367  | G | A | NULL | 0.551071269 | NULL&M | Disease |
| 11 | 118826045 | rs537080    | C | T | NULL | 0.551071269 | NULL&M | Disease |
| 11 | 116811057 | rs2513099   | C | T | NULL | 0.551071269 | NULL&M | Disease |
| 11 | 120637669 | rs11822437  | A | T | NULL | 0.551071269 | NULL&M | Disease |
| 11 | 120972112 | rs78830794  | C | T | NULL | 0.551071269 | NULL&M | Disease |
| 11 | 116998879 | rs4310650   | T | C | NULL | 0.551071269 | NULL&M | Disease |
| 11 | 120509621 | rs6589824   | G | A | NULL | 0.55230791  | NULL&M | Disease |
| 11 | 120723433 | rs4430518   | G | T | NULL | 0.55230791  | NULL&M | Disease |
| 11 | 116285930 | rs576670    | G | A | NULL | 0.55230791  | NULL&M | Disease |
| 11 | 118926720 | rs470679    | A | C | NULL | 0.55230791  | NULL&M | Disease |
| 11 | 118555692 | rs10892252  | G | A | NULL | 0.55230791  | NULL&M | Disease |
| 11 | 120570346 | rs12273984  | C | T | NULL | 0.55230791  | NULL&M | Disease |
| 11 | 120630546 | rs1939674   | G | T | NULL | 0.55230791  | NULL&M | Disease |
| 11 | 119723230 | rs477113    | C | T | NULL | 0.55230791  | NULL&M | Disease |
| 11 | 119908975 | rs149021690 | C | T | NULL | 0.55230791  | NULL&M | Disease |
| 11 | 119592454 | rs10892442  | G | A | NULL | 0.55230791  | NULL&M | Disease |

|    |           |             |   |   |       |           |           |        |          |
|----|-----------|-------------|---|---|-------|-----------|-----------|--------|----------|
| 11 | 117923742 | rs74235117  | T | C | 0.92  | -7977.388 | -7977.773 | -0.385 | 2.63E-06 |
| 11 | 118563286 | rs527619    | A | G | 0.95  | -7977.388 | -7977.774 | -0.385 | 2.63E-06 |
| 11 | 116800154 | rs547919    | T | A | 0.92  | -7977.388 | -7977.774 | -0.386 | 2.63E-06 |
| 11 | 119909507 | rs688857    | T | C | 0.924 | -7977.388 | -7977.775 | -0.387 | 2.63E-06 |
| 11 | 117796722 | rs7107023   | T | C | 0.933 | -7977.388 | -7977.776 | -0.388 | 2.62E-06 |
| 11 | 116834953 | rs1815789   | C | T | 1.059 | -7977.388 | -7977.777 | -0.389 | 2.62E-06 |
| 11 | 116838904 | rs7941927   | G | A | 1.059 | -7977.388 | -7977.777 | -0.389 | 2.62E-06 |
| 11 | 116911784 | rs61582023  | G | A | 0.921 | -7977.388 | -7977.777 | -0.389 | 2.62E-06 |
| 11 | 117316605 | rs60385993  | A | G | 1.073 | -7977.388 | -7977.777 | -0.389 | 2.62E-06 |
| 11 | 117317947 | rs111446534 | A | C | 1.073 | -7977.388 | -7977.777 | -0.389 | 2.62E-06 |
| 11 | 118652781 | rs2508915   | C | G | 0.937 | -7977.388 | -7977.777 | -0.389 | 2.62E-06 |
| 11 | 118777978 | rs78755429  | A | C | 0.92  | -7977.388 | -7977.777 | -0.389 | 2.62E-06 |
| 11 | 120836662 | rs524209    | A | G | 0.944 | -7977.388 | -7977.778 | -0.389 | 2.62E-06 |
| 11 | 118117018 | rs11216831  | A | G | 0.929 | -7977.388 | -7977.778 | -0.39  | 2.62E-06 |
| 11 | 116498649 | rs61906060  | G | A | 0.936 | -7977.388 | -7977.779 | -0.391 | 2.62E-06 |
| 11 | 117899803 | rs617357    | A | G | 0.944 | -7977.388 | -7977.781 | -0.392 | 2.61E-06 |
| 11 | 119516473 | rs10892426  | T | C | 0.93  | -7977.388 | -7977.78  | -0.392 | 2.61E-06 |
| 11 | 119808052 | rs1955021   | A | G | 1.055 | -7977.388 | -7977.78  | -0.392 | 2.61E-06 |
| 11 | 120916015 | rs141784177 | G | C | 0.92  | -7977.388 | -7977.78  | -0.392 | 2.61E-06 |
| 11 | 119539364 | rs4938706   | A | G | 0.95  | -7977.388 | -7977.782 | -0.393 | 2.61E-06 |
| 11 | 117561265 | rs10892162  | G | A | 0.94  | -7977.388 | -7977.783 | -0.394 | 2.61E-06 |
| 11 | 117605574 | rs1939982   | G | A | 0.923 | -7977.388 | -7977.782 | -0.394 | 2.61E-06 |
| 11 | 116548489 | rs112548685 | T | C | 1.078 | -7977.388 | -7977.783 | -0.395 | 2.61E-06 |
| 11 | 119541778 | rs4459318   | T | C | 0.95  | -7977.388 | -7977.784 | -0.396 | 2.60E-06 |
| 11 | 119781153 | rs7115603   | G | A | 1.079 | -7977.388 | -7977.784 | -0.396 | 2.60E-06 |
| 11 | 119914788 | rs11217655  | C | A | 1.079 | -7977.388 | -7977.785 | -0.396 | 2.60E-06 |
| 11 | 118648396 | rs548167    | A | G | 0.937 | -7977.388 | -7977.785 | -0.397 | 2.60E-06 |
| 11 | 120790814 | rs75736746  | G | A | 1.082 | -7977.388 | -7977.785 | -0.397 | 2.60E-06 |
| 11 | 118572267 | rs573905    | A | G | 0.951 | -7977.388 | -7977.787 | -0.398 | 2.60E-06 |
| 11 | 118834322 | rs118003247 | G | A | 1.076 | -7977.388 | -7977.787 | -0.398 | 2.60E-06 |
| 11 | 120417065 | rs2252490   | C | G | 0.947 | -7977.388 | -7977.786 | -0.398 | 2.60E-06 |
| 11 | 117532692 | rs12789293  | T | C | 0.921 | -7977.388 | -7977.787 | -0.399 | 2.60E-06 |
| 11 | 119936507 | rs1893393   | A | T | 1.064 | -7977.388 | -7977.788 | -0.399 | 2.60E-06 |
| 11 | 117678420 | rs11216551  | A | G | 1.083 | -7977.388 | -7977.788 | -0.4   | 2.59E-06 |
| 11 | 117678543 | rs12790243  | A | G | 0.951 | -7977.388 | -7977.788 | -0.4   | 2.59E-06 |
| 11 | 116572169 | rs71480317  | C | T | 0.922 | -7977.388 | -7977.789 | -0.401 | 2.59E-06 |
| 11 | 116917885 | rs73576603  | A | G | 0.923 | -7977.388 | -7977.789 | -0.401 | 2.59E-06 |
| 11 | 117416908 | rs521187    |   |   |       |           |           |        |          |

|    |           |              |   |   |      |             |        |         |
|----|-----------|--------------|---|---|------|-------------|--------|---------|
| 11 | 120086680 | rs11217768   | A | G | NULL | 0.55230791  | NULL&M | Disease |
| 11 | 120627270 | rs79530554   | T | C | NULL | 0.55230791  | NULL&M | Disease |
| 11 | 117618530 | rs73585234   | T | C | NULL | 0.55230791  | NULL&M | Disease |
| 11 | 119817309 | rs61899038   | A | T | NULL | 0.55230791  | NULL&M | Disease |
| 11 | 119817670 | rs553492     | A | C | NULL | 0.55230791  | NULL&M | Disease |
| 11 | 116436913 | rs61904810   | T | C | NULL | 0.55230791  | NULL&M | Disease |
| 11 | 116938655 | rs58848374   | A | G | NULL | 0.55230791  | NULL&M | Disease |
| 11 | 117283091 | rs2279013    | C | T | NULL | 0.553543903 | NULL&M | Disease |
| 11 | 117889224 | rs2512153    | G | A | NULL | 0.553543903 | NULL&M | Disease |
| 11 | 119994765 | rs586407     | A | G | NULL | 0.55230791  | NULL&M | Disease |
| 11 | 117671489 | rs3819132    | A | G | NULL | 0.553543903 | NULL&M | Disease |
| 11 | 116661488 | rs3135507    | T | C | NULL | 0.553543903 | NULL&M | Disease |
| 11 | 119813521 | rs76264435   | A | G | NULL | 0.553543903 | NULL&M | Disease |
| 11 | 116331172 | rs11215943   | T | G | NULL | 0.553543903 | NULL&M | Disease |
| 11 | 117672474 | rs10892172   | A | C | NULL | 0.553543903 | NULL&M | Disease |
| 11 | 118637666 | rs535996     | T | C | NULL | 0.553543903 | NULL&M | Disease |
| 11 | 118640081 | rs529717     | A | G | NULL | 0.553543903 | NULL&M | Disease |
| 11 | 117573319 | rs74833570   | T | G | NULL | 0.55230791  | NULL&M | Disease |
| 11 | 118565651 | rs540800     | A | G | NULL | 0.553543903 | NULL&M | Disease |
| 11 | 120152148 | rs7105395    | T | C | NULL | 0.553543903 | NULL&M | Disease |
| 11 | 116937074 | rs117315666  | T | G | NULL | 0.553543903 | NULL&M | Disease |
| 11 | 117123218 | rs77262524   | G | C | NULL | 0.553543903 | NULL&M | Disease |
| 11 | 121006301 | rs11218154   | A | G | NULL | 0.553543903 | NULL&M | Disease |
| 11 | 117404179 | rs612979     | G | T | NULL | 0.553543903 | NULL&M | Disease |
| 11 | 119703523 | rs12793318   | A | G | NULL | 0.553543903 | NULL&M | Disease |
| 11 | 120415823 | rs2252634    | T | C | NULL | 0.554779235 | NULL&M | Disease |
| 11 | 120633447 | rs183832950  | T | G | NULL | 0.553543903 | NULL&M | Disease |
| 11 | 116620796 | rs2849179    | T | C | NULL | 0.554779235 | NULL&M | Disease |
| 11 | 117397271 | rs148092485  | A | T | NULL | 0.553543903 | NULL&M | Disease |
| 11 | 117675286 | rs12364667   | G | T | NULL | 0.554779235 | NULL&M | Disease |
| 11 | 119540705 | rs111259707  | C | T | NULL | 0.554779235 | NULL&M | Disease |
| 11 | 119733584 | rs73008672   | T | C | NULL | 0.554779235 | NULL&M | Disease |
| 11 | 117567949 | rs10790200   | C | T | NULL | 0.554779235 | NULL&M | Disease |
| 11 | 118063030 | rs11216807   | C | T | NULL | 0.554779235 | NULL&M | Disease |
| 11 | 118641451 | rs2508929    | G | T | NULL | 0.554779235 | NULL&M | Disease |
| 11 | 120652936 | rs11218005   | T | G | NULL | 0.553543903 | NULL&M | Disease |
| 11 | 117102706 | rs2277286    | G | C | NULL | 0.554779235 | NULL&M | Disease |
| 11 | 120152147 | rs7121490    | C | T | NULL | 0.554779235 | NULL&M | Disease |
| 11 | 116428302 | rs7108237    | A | G | NULL | 0.554779235 | NULL&M | Disease |
| 11 | 117407275 | rs117053908  | T | G | NULL | 0.553543903 | NULL&M | Disease |
| 11 | 117887757 | rs2512152    | T | C | NULL | 0.554779235 | NULL&M | Disease |
| 11 | 118146462 | rs1616199    | T | C | NULL | 0.556013891 | NULL&M | Disease |
| 11 | 118803160 | rs73575440   | A | G | NULL | 0.554779235 | NULL&M | Disease |
| 11 | 118803596 | rs111313044  | A | G | NULL | 0.554779235 | NULL&M | Disease |
| 11 | 119584274 | rs10892440   | T | C | NULL | 0.554779235 | NULL&M | Disease |
| 11 | 119586117 | rs7931978    | G | A | NULL | 0.554779235 | NULL&M | Disease |
| 11 | 119586389 | rs10790338   | G | T | NULL | 0.554779235 | NULL&M | Disease |
| 11 | 120018127 | rs1448722646 | T | C | NULL | 0.554779235 | NULL&M | Disease |
| 11 | 116392086 | rs146990932  | T | C | NULL | 0.554779235 | NULL&M | Disease |
| 11 | 120652371 | rs2846104    | G | C | NULL | 0.554779235 | NULL&M | Disease |
| 11 | 120653034 | rs11218006   | A | G | NULL | 0.554779235 | NULL&M | Disease |
| 11 | 117559219 | rs12288712   | T | C | NULL | 0.556013891 | NULL&M | Disease |
| 11 | 117957631 | rs1203387394 | C | G | NULL | 0.556013891 | NULL&M | Disease |
| 11 | 119806917 | rs895650     | T | C | NULL | 0.556013891 | NULL&M | Disease |
| 11 | 117507325 | rs495258     | T | C | NULL | 0.554779235 | NULL&M | Disease |
| 11 | 121077373 | rs612804     | C | T | NULL | 0.556013891 | NULL&M | Disease |
| 11 | 116718366 | rs628418     | G | C | NULL | 0.554779235 | NULL&M | Disease |
| 11 | 118317907 | rs528056     | T | C | NULL | 0.556013891 | NULL&M | Disease |
| 11 | 119636704 | rs7130633    | A | C | NULL | 0.556013891 | NULL&M | Disease |
| 11 | 119797684 | rs112297727  | T | C | NULL | 0.556013891 | NULL&M | Disease |
| 11 | 119797706 | rs111954335  | T | C | NULL | 0.556013891 | NULL&M | Disease |
| 11 | 119797995 | rs77109784   | G | A | NULL | 0.556013891 | NULL&M | Disease |
| 11 | 119798123 | rs75748285   | C | T | NULL | 0.556013891 | NULL&M | Disease |
| 11 | 119798178 | rs76777718   | A | G | NULL | 0.556013891 | NULL&M | Disease |
| 11 | 119798205 | rs75640250   | A | C | NULL | 0.556013891 | NULL&M | Disease |
| 11 | 119798592 | rs74840179   | C | G | NULL | 0.556013891 | NULL&M | Disease |
| 11 | 119799196 | rs77400160   | T | C | NULL | 0.556013891 | NULL&M | Disease |
| 11 | 119799219 | rs80166158   | A | G | NULL | 0.556013891 | NULL&M | Disease |
| 11 | 119799826 | rs112293704  | G | T | NULL | 0.556013891 | NULL&M | Disease |
| 11 | 119800547 | rs78178500   | A | C | NULL | 0.556013891 | NULL&M | Disease |
| 11 | 119801279 | rs79048103   | T | C | NULL | 0.556013891 | NULL&M | Disease |
| 11 | 119801401 | rs75417087   | T | G | NULL | 0.556013891 | NULL&M | Disease |
| 11 | 119801704 | rs79592175   | C | G | NULL | 0.556013891 | NULL&M | Disease |
| 11 | 119801962 | rs78763435   | A | T | NULL | 0.556013891 | NULL&M | Disease |
| 11 | 119802186 | rs754871     | G | A | NULL | 0.556013891 | NULL&M | Disease |
| 11 | 120565023 | rs12292552   | A | G | NULL | 0.556013891 | NULL&M | Disease |
| 11 | 117946849 | rs117440454  | T | C | NULL | 0.556013891 | NULL&M | Disease |
| 11 | 119818055 | rs113442800  | T | C | NULL | 0.554779235 | NULL&M | Disease |
| 11 | 121072293 | rs687180     | A | G | NULL | 0.556013891 | NULL&M | Disease |
| 11 | 118143062 | rs117666845  | A | T | NULL | 0.556013891 | NULL&M | Disease |
| 11 | 116943912 | rs73006585   | C | G | NULL | 0.556013891 | NULL&M | Disease |
| 11 | 117116312 | rs111447379  | T | C | NULL | 0.556013891 | NULL&M | Disease |
| 11 | 117582279 | rs11607103   | C | T | NULL | 0.556013891 | NULL&M | Disease |
| 11 | 118559731 | rs113784020  | T | C | NULL | 0.556013891 | NULL&M | Disease |
| 11 | 120053300 | rs518863     | T | C | NULL | 0.556013891 | NULL&M | Disease |
| 11 | 120087541 | rs1551240    | T | C | NULL | 0.556013891 | NULL&M | Disease |
| 11 | 120875383 | rs2510639    | A | G | NULL | 0.557247855 | NULL&M | Disease |
| 11 | 121040934 | rs118170232  | G | A | NULL | 0.556013891 | NULL&M | Disease |
| 11 | 119837014 | rs118070092  | A | G | NULL | 0.556013891 | NULL&M | Disease |
| 11 | 121076423 | rs616905     | C | T | NULL | 0.557247855 | NULL&M | Disease |
| 11 | 116372414 | rs879412     | A | G | NULL | 0.557247855 | NULL&M | Disease |
| 11 | 120123837 | rs116863015  | A | G | NULL | 0.556013891 | NULL&M | Disease |
| 11 | 119817426 | rs580318     | C | A | NULL | 0.556013891 | NULL&M | Disease |
| 11 | 119817579 | rs471714     | A | T | NULL | 0.556013891 | NULL&M | Disease |
| 11 | 119817708 | rs472665     | T | C | NULL | 0.556013891 | NULL&M | Disease |
| 11 | 119819087 | rs476877     | C | T | NULL | 0.556013891 | NULL&M | Disease |

|      |           |             |   |   |       |           |           |        |          |
|------|-----------|-------------|---|---|-------|-----------|-----------|--------|----------|
| 11   | 120086680 | rs11217768  | A | G | 0.923 | -7977.388 | -7977.816 | -0.427 | 2.52E-06 |
| 11   | 120627270 | rs79530554  | T | C | 0.923 | -7977.388 | -7977.816 | -0.427 | 2.52E-06 |
| 11   | 117618530 | rs73585234  | T | C | 0.928 | -7977.388 | -7977.816 | -0.428 | 2.52E-06 |
| 11   | 119817309 | rs61899038  | A | T | 0.923 | -7977.388 | -7977.816 | -0.428 | 2.52E-06 |
| 11   | 119817670 | rs553492    | A | C | 0.923 | -7977.388 | -7977.816 | -0.428 | 2.52E-06 |
| 11   | 116436913 | rs61904810  | T | C | 1.08  | -7977.388 | -7977.818 | -0.43  | 2.52E-06 |
| 11   | 116938655 | rs58848374  | A | G | 0.925 | -7977.388 | -7977.819 | -0.43  | 2.52E-06 |
| 11   | 117283091 | rs2279013   | C | T | 0.949 | -7977.388 | -7977.819 | -0.431 | 2.51E-06 |
| 11   | 117889224 | rs2512153   | G | A | 0.948 | -7977.388 | -7977.82  | -0.431 | 2.51E-06 |
| 11   | 119994765 | rs586407    | A | G | 0.925 | -7977.388 | -7977.819 | -0.431 | 2.51E-06 |
| 11   | 117671489 | rs3819132   | A | G | 1.051 | -7977.388 | -7977.821 | -0.432 | 2.51E-06 |
| 11   | 116661488 | rs3135507   | T | C | 0.923 | -7977.388 | -7977.822 | -0.433 | 2.51E-06 |
| 11   | 119813521 | rs76264435  | A | G | 0.947 | -7977.388 | -7977.821 | -0.433 | 2.51E-06 |
| 11   | 116331172 | rs11215943  | T | G | 0.924 | -7977.388 | -7977.823 | -0.434 | 2.51E-06 |
| 11   | 117672474 | rs10892172  | A | C | 0.951 | -7977.388 | -7977.823 | -0.434 | 2.51E-06 |
| 11   | 118637666 | rs535996    | T | C | 0.938 | -7977.388 | -7977.822 | -0.434 | 2.51E-06 |
| 11   | 118640081 | rs529717    | A | G | 0.938 | -7977.388 | -7977.822 | -0.434 | 2.51E-06 |
| 11   | 117573319 | rs74833570  | T | G | 0.929 | -7977.388 | -7977.823 | -0.435 | 2.50E-06 |
| 11   | 118565651 | rs540800    | A | G | 0.951 | -7977.388 | -7977.823 | -0.435 | 2.50E-06 |
| 11   | 120152148 | rs7105395   | T | C | 0.93  | -7977.388 | -7977.823 | -0.435 | 2.50E-06 |
| 11   | 116937074 | rs117315666 | T | G | 0.927 | -7977.388 | -7977.824 | -0.436 | 2.50E-06 |
| 11   | 117123218 | rs77262524  | G | C | 0.925 | -7977.388 | -7977.824 | -0.436 | 2.50E-06 |
| 11   | 121006301 | rs11218154  | A | G | 0.925 | -7977.388 | -7977.824 | -0.436 | 2.50E-06 |
| 11   | 117404179 | rs612979    | G | T | 0.924 | -7977.388 | -7977.827 | -0.438 | 2.50E-06 |
| 11   | 119703523 | rs12793318  | A | G | 1.067 | -7977.388 | -7977.826 | -0.438 | 2.50E-06 |
| 11   | 120415823 | rs2252634   | T | C | 0.948 | -7977.388 | -7977.827 | -0.439 | 2.49E-06 |
| 11   | 120633447 | rs183832950 | T | G | 0.925 | -7977.388 | -7977.827 | -0.439 | 2.49E-06 |
| 11   | 116620796 | rs2849179   | T | C | 0.951 | -7977.388 | -7977.828 | -0.44  | 2.49E-06 |
| 11   | 117397271 | rs148092485 | A | T | 1.081 | -7977.388 | -7977.829 | -0.44  | 2.49E-06 |
| 11   | 117675286 | rs12364667  | G | T | 0.949 | -7977.388 | -7977.828 | -0.44  | 2.49E-06 |
| 11   | 119540705 | rs111259707 | C | T | 0.941 | -7977.388 | -7977.828 | -0.44  | 2.49E-06 |
| 11   | 119733584 | rs73008672  | T | C | 1.066 | -7977.388 | -7977.83  | -0.441 | 2.49E-06 |
| 11   | 117567949 | rs10790200  | C | T | 0.933 | -7977.388 | -7977.83  | -0.442 | 2.49E-06 |
| 11   | 118063030 | rs11216807  | C | T | 1.056 | -7977.388 | -7977.831 | -0.443 | 2.48E-06 |
| 11   | 118641451 | rs2508929   | G | T | 0.938 | -7977.388 | -7977.831 | -0.443 | 2.48E-06 |
| 11   | 120652936 | rs11218005  | T | G | 0.925 | -7977.388 | -7977.832 | -0.444 | 2.48E-06 |
| 11   | 117102706 | rs2277286   | G | C | 0.935 | -7977.388 | -7977.834 | -0.445 | 2.48E-06 |
| 11</ |           |             |   |   |       |           |           |        |          |

|    |           |              |   |   |      |             |        |         |
|----|-----------|--------------|---|---|------|-------------|--------|---------|
| 11 | 116607641 | rs180351     | T | C | NULL | 0.557247855 | NULL&M | Disease |
| 11 | 117982495 | rs1941635    | T | G | NULL | 0.557247855 | NULL&M | Disease |
| 11 | 120991571 | rs74945140   | A | G | NULL | 0.557247855 | NULL&M | Disease |
| 11 | 117367838 | rs11603937   | A | G | NULL | 0.557247855 | NULL&M | Disease |
| 11 | 120554278 | rs12292453   | T | C | NULL | 0.557247855 | NULL&M | Disease |
| 11 | 116391651 | rs7120429    | T | C | NULL | 0.558481112 | NULL&M | Disease |
| 11 | 116829653 | rs7120173    | G | T | NULL | 0.558481112 | NULL&M | Disease |
| 11 | 120649949 | rs72995858   | T | C | NULL | 0.557247855 | NULL&M | Disease |
| 11 | 116222151 | rs12792619   | C | T | NULL | 0.558481112 | NULL&M | Disease |
| 11 | 117576946 | rs75819084   | T | C | NULL | 0.557247855 | NULL&M | Disease |
| 11 | 121169052 | rs75960142   | C | T | NULL | 0.557247855 | NULL&M | Disease |
| 11 | 116470289 | rs145936741  | G | A | NULL | 0.557247855 | NULL&M | Disease |
| 11 | 116960078 | rs1481148807 | A | G | NULL | 0.557247855 | NULL&M | Disease |
| 11 | 118061480 | rs7103918    | T | C | NULL | 0.558481112 | NULL&M | Disease |
| 11 | 116697301 | rs140231532  | T | C | NULL | 0.557247855 | NULL&M | Disease |
| 11 | 117570395 | rs12273147   | A | G | NULL | 0.558481112 | NULL&M | Disease |
| 11 | 119876350 | rs113111994  | T | G | NULL | 0.557247855 | NULL&M | Disease |
| 11 | 120470291 | rs4245037    | A | T | NULL | 0.558481112 | NULL&M | Disease |
| 11 | 117069788 | rs2269398    | T | C | NULL | 0.558481112 | NULL&M | Disease |
| 11 | 117796139 | rs55720349   | C | T | NULL | 0.558481112 | NULL&M | Disease |
| 11 | 119483777 | rs78341300   | G | A | NULL | 0.558481112 | NULL&M | Disease |
| 11 | 120042082 | rs529681     | A | G | NULL | 0.558481112 | NULL&M | Disease |
| 11 | 120653294 | rs11218007   | A | G | NULL | 0.558481112 | NULL&M | Disease |
| 11 | 116616402 | rs180340     | C | T | NULL | 0.558481112 | NULL&M | Disease |
| 11 | 116724204 | rs598503     | C | T | NULL | 0.558481112 | NULL&M | Disease |
| 11 | 118543563 | rs10892251   | T | C | NULL | 0.558481112 | NULL&M | Disease |
| 11 | 119506255 | rs10790328   | G | C | NULL | 0.558481112 | NULL&M | Disease |
| 11 | 119674096 | rs11217514   | A | G | NULL | 0.558481112 | NULL&M | Disease |
| 11 | 117659322 | rs11216545   | A | G | NULL | 0.558481112 | NULL&M | Disease |
| 11 | 120187422 | rs148189915  | T | A | NULL | 0.558481112 | NULL&M | Disease |
| 11 | 116278612 | rs7925794    | T | C | NULL | 0.559713649 | NULL&M | Disease |
| 11 | 116472577 | rs34994677   | G | A | NULL | 0.558481112 | NULL&M | Disease |
| 11 | 118100176 | rs12361791   | G | T | NULL | 0.558481112 | NULL&M | Disease |
| 11 | 120144571 | rs138488120  | A | C | NULL | 0.558481112 | NULL&M | Disease |
| 11 | 121093301 | rs117235919  | A | G | NULL | 0.558481112 | NULL&M | Disease |
| 11 | 117104900 | rs117547981  | A | G | NULL | 0.558481112 | NULL&M | Disease |
| 11 | 120302456 | rs117092333  | A | G | NULL | 0.558481112 | NULL&M | Disease |
| 11 | 116478432 | rs17119839   | G | A | NULL | 0.558481112 | NULL&M | Disease |
| 11 | 117200129 | rs75013797   | T | C | NULL | 0.558481112 | NULL&M | Disease |
| 11 | 118312870 | rs74422681   | G | A | NULL | 0.559713649 | NULL&M | Disease |
| 11 | 117958429 | rs603455     | T | A | NULL | 0.559713649 | NULL&M | Disease |
| 11 | 118802128 | rs59069289   | T | G | NULL | 0.559713649 | NULL&M | Disease |
| 11 | 118802386 | rs59480472   | C | T | NULL | 0.559713649 | NULL&M | Disease |
| 11 | 116617782 | rs180339     | T | C | NULL | 0.559713649 | NULL&M | Disease |
| 11 | 117569523 | rs7122782    | A | G | NULL | 0.559713649 | NULL&M | Disease |
| 11 | 119026384 | rs56168028   | G | A | NULL | 0.558481112 | NULL&M | Disease |
| 11 | 116633825 | rs918144     | T | C | NULL | 0.559713649 | NULL&M | Disease |
| 11 | 117179891 | rs676134     | T | C | NULL | 0.559713649 | NULL&M | Disease |
| 11 | 119514129 | rs906827     | A | C | NULL | 0.559713649 | NULL&M | Disease |
| 11 | 120825635 | rs4936569    | C | T | NULL | 0.559713649 | NULL&M | Disease |
| 11 | 117352364 | rs73022382   | A | G | NULL | 0.559713649 | NULL&M | Disease |
| 11 | 118134597 | rs4936426    | C | T | NULL | 0.559713649 | NULL&M | Disease |
| 11 | 116693871 | rs12721041   | T | C | NULL | 0.559713649 | NULL&M | Disease |
| 11 | 117378697 | rs117328724  | T | C | NULL | 0.559713649 | NULL&M | Disease |
| 11 | 117070740 | rs2170317    | C | A | NULL | 0.559713649 | NULL&M | Disease |
| 11 | 117129617 | rs550893     | A | G | NULL | 0.559713649 | NULL&M | Disease |
| 11 | 116479584 | rs527778     | T | G | NULL | 0.56094545  | NULL&M | Disease |
| 11 | 116491465 | rs112732949  | G | A | NULL | 0.559713649 | NULL&M | Disease |
| 11 | 117720781 | rs7928007    | C | A | NULL | 0.559713649 | NULL&M | Disease |
| 11 | 119816766 | rs657317     | A | C | NULL | 0.559713649 | NULL&M | Disease |
| 11 | 116610048 | rs180350     | T | C | NULL | 0.56094545  | NULL&M | Disease |
| 11 | 117646968 | rs61905347   | T | C | NULL | 0.56094545  | NULL&M | Disease |
| 11 | 117474845 | rs61697909   | A | G | NULL | 0.56094545  | NULL&M | Disease |
| 11 | 117181992 | rs656083     | C | T | NULL | 0.56094545  | NULL&M | Disease |
| 11 | 118150205 | rs1793170    | C | T | NULL | 0.56094545  | NULL&M | Disease |
| 11 | 119892194 | rs603179     | A | G | NULL | 0.56094545  | NULL&M | Disease |
| 11 | 117892050 | rs675929     | A | G | NULL | 0.56094545  | NULL&M | Disease |
| 11 | 119817739 | rs554338     | C | T | NULL | 0.56094545  | NULL&M | Disease |
| 11 | 119818657 | rs628244     | T | C | NULL | 0.56094545  | NULL&M | Disease |
| 11 | 119818914 | rs475178     | G | A | NULL | 0.56094545  | NULL&M | Disease |
| 11 | 119818937 | rs475867     | A | G | NULL | 0.56094545  | NULL&M | Disease |
| 11 | 116620377 | rs117164485  | A | G | NULL | 0.56094545  | NULL&M | Disease |
| 11 | 116887751 | rs12786797   | A | G | NULL | 0.56094545  | NULL&M | Disease |
| 11 | 117520361 | rs71480349   | C | T | NULL | 0.56094545  | NULL&M | Disease |
| 11 | 120716019 | rs10892629   | T | C | NULL | 0.56094545  | NULL&M | Disease |
| 11 | 119808956 | rs880004     | G | A | NULL | 0.56094545  | NULL&M | Disease |
| 11 | 120564627 | rs114428118  | T | G | NULL | 0.56094545  | NULL&M | Disease |
| 11 | 120851221 | rs557501     | C | G | NULL | 0.56094545  | NULL&M | Disease |
| 11 | 116242693 | rs11215905   | C | T | NULL | 0.56094545  | NULL&M | Disease |
| 11 | 116420968 | rs117843763  | A | C | NULL | 0.56094545  | NULL&M | Disease |
| 11 | 116590039 | rs180376     | C | G | NULL | 0.56094545  | NULL&M | Disease |
| 11 | 117647496 | rs17311045   | T | C | NULL | 0.56094545  | NULL&M | Disease |
| 11 | 117069023 | rs7112573    | C | T | NULL | 0.56094545  | NULL&M | Disease |
| 11 | 117537132 | rs17121057   | C | A | NULL | 0.56094545  | NULL&M | Disease |
| 11 | 118555383 | rs2508573    | T | C | NULL | 0.562176501 | NULL&M | Disease |
| 11 | 119817385 | rs550764     | A | T | NULL | 0.56094545  | NULL&M | Disease |
| 11 | 117338912 | rs2511050    | A | G | NULL | 0.562176501 | NULL&M | Disease |
| 11 | 117498834 | rs78915622   | G | A | NULL | 0.562176501 | NULL&M | Disease |
| 11 | 117515365 | rs10790198   | A | G | NULL | 0.562176501 | NULL&M | Disease |
| 11 | 116299637 | rs73580434   | T | A | NULL | 0.562176501 | NULL&M | Disease |
| 11 | 116717663 | rs614944     | C | T | NULL | 0.56094545  | NULL&M | Disease |
| 11 | 117483306 | rs12576806   | A | G | NULL | 0.56094545  | NULL&M | Disease |
| 11 | 120736087 | rs11218035   | T | C | NULL | 0.562176501 | NULL&M | Disease |
| 11 | 116728029 | rs509712     | G | A | NULL | 0.56094545  | NULL&M | Disease |
| 11 | 117588461 | rs74453782   | T | C | NULL | 0.56094545  | NULL&M | Disease |
| 11 | 117089722 | rs2239009    | C | G | NULL | 0.562176501 | NULL&M | Disease |

|    |           |              |   |   |       |           |           |        |          |
|----|-----------|--------------|---|---|-------|-----------|-----------|--------|----------|
| 11 | 116607641 | rs180351     | T | C | 0.952 | -7977.388 | -7977.851 | -0.463 | 2.43E-06 |
| 11 | 117982495 | rs1941635    | T | G | 1.078 | -7977.388 | -7977.851 | -0.463 | 2.43E-06 |
| 11 | 120991571 | rs74945140   | A | G | 1.072 | -7977.388 | -7977.852 | -0.464 | 2.43E-06 |
| 11 | 117367838 | rs11603937   | A | G | 0.929 | -7977.388 | -7977.855 | -0.466 | 2.43E-06 |
| 11 | 120554278 | rs12292453   | T | C | 0.926 | -7977.388 | -7977.855 | -0.467 | 2.42E-06 |
| 11 | 116391651 | rs7120429    | T | C | 0.947 | -7977.388 | -7977.856 | -0.468 | 2.42E-06 |
| 11 | 116829653 | rs7120173    | G | T | 1.057 | -7977.388 | -7977.856 | -0.468 | 2.42E-06 |
| 11 | 120649949 | rs72995858   | T | C | 0.928 | -7977.388 | -7977.857 | -0.469 | 2.42E-06 |
| 11 | 116222151 | rs12792619   | C | T | 0.93  | -7977.388 | -7977.859 | -0.47  | 2.42E-06 |
| 11 | 117576946 | rs75819084   | T | C | 0.935 | -7977.388 | -7977.859 | -0.47  | 2.42E-06 |
| 11 | 121169052 | rs75960142   | C | T | 0.931 | -7977.388 | -7977.859 | -0.471 | 2.42E-06 |
| 11 | 116470289 | rs145936741  | G | A | 0.927 | -7977.388 | -7977.861 | -0.472 | 2.41E-06 |
| 11 | 116960078 | rs1481148807 | A | G | 0.929 | -7977.388 | -7977.86  | -0.472 | 2.41E-06 |
| 11 | 118061480 | rs7103918    | T | C | 1.056 | -7977.388 | -7977.86  | -0.472 | 2.41E-06 |
| 11 | 116697301 | rs140231532  | T | C | 0.933 | -7977.388 | -7977.861 | -0.473 | 2.41E-06 |
| 11 | 117570395 | rs12273147   | A | G | 0.934 | -7977.388 | -7977.861 | -0.473 | 2.41E-06 |
| 11 | 119876350 | rs113111994  | T | G | 0.929 | -7977.388 | -7977.861 | -0.473 | 2.41E-06 |
| 11 | 120470291 | rs4245037    | A | T | 1.053 | -7977.388 | -7977.862 | -0.473 | 2.41E-06 |
| 11 | 117069788 | rs2269398    | T | C | 1.075 | -7977.388 | -7977.863 | -0.474 | 2.41E-06 |
| 11 | 117796139 | rs55720349   | C | T | 0.936 | -7977.388 | -7977.862 | -0.474 | 2.41E-06 |
| 11 | 119483777 | rs78341300   | G | A | 1.068 | -7977.388 | -7977.862 | -0.474 | 2.41E-06 |
| 11 | 120042082 | rs529681     | A | G | 0.931 | -7977.388 | -7977.862 | -0.474 | 2.41E-06 |
| 11 | 120653294 | rs11218007   | A | G | 0.929 | -7977.388 | -7977.864 | -0.475 | 2.41E-06 |
| 11 | 116616402 | rs180340     | C | T | 0.952 | -7977.388 | -7977.864 | -0.476 | 2.40E-06 |
| 11 | 116724204 | rs598503     | C | T | 0.929 | -7977.388 | -7977.864 | -0.476 | 2.40E-06 |
| 11 | 118543563 | rs10892251   | T | C | 1.056 | -7977.388 | -7977.865 | -0.476 | 2.40E-06 |
| 11 | 119506255 | rs10790328   | G | C | 1.051 | -7977.388 | -7977.864 | -0.476 | 2.40E-06 |
| 11 | 119674096 | rs11217514   | A | G | 0.938 | -7977.388 | -7977.864 | -0.476 | 2.40E-06 |
| 11 | 117659322 | rs11216545   | A | G | 1.051 | -7977.388 | -7977.865 | -0.477 | 2.40E-06 |
| 11 | 120187422 | rs148189915  | T | A | 0.927 | -7977.388 | -7977.866 | -0.477 | 2.40E-06 |
| 11 | 116278612 | rs7925794    | T | C | 1.053 | -7977.388 | -7977.866 | -0.478 | 2.40E-06 |
| 11 | 116472577 | rs34994677   | G | A | 0.933 | -7977.388 | -7977.867 | -0.478 | 2.40E-06 |
| 11 | 118100176 | rs12361791   | G | T | 0.933 | -7977.388 | -7977.866 | -0.478 | 2.40E-06 |
| 11 | 120144571 | rs138488120  | A | C | 0.928 | -7977.388 | -7977.866 | -0.478 | 2.40E-06 |
| 11 | 121093301 | rs117235919  | A | G | 0.935 | -7977.388 | -7977.867 | -0.478 | 2.40E-06 |
| 11 | 117104900 | rs117547981  | A | G | 0.932 | -7977.388 | -7977.868 | -0.479 | 2.40E-06 |
| 11 | 120302456 | rs117092333  | A | G | 0.927 | -7977.388 | -7977.868 | -0.48  | 2.39E-06 |
| 11 | 116478432 | rs171        |   |   |       |           |           |        |          |

|    |           |             |   |   |      |             |        |         |
|----|-----------|-------------|---|---|------|-------------|--------|---------|
| 11 | 117890273 | rs2508449   | C | T | NULL | 0.562176501 | NULL&M | Disease |
| 11 | 117890681 | rs1939127   | C | T | NULL | 0.562176501 | NULL&M | Disease |
| 11 | 117891216 | rs2512156   | C | A | NULL | 0.562176501 | NULL&M | Disease |
| 11 | 118238119 | rs11216859  | C | T | NULL | 0.562176501 | NULL&M | Disease |
| 11 | 118711069 | rs538645    | C | T | NULL | 0.562176501 | NULL&M | Disease |
| 11 | 120343033 | rs61898762  | G | T | NULL | 0.562176501 | NULL&M | Disease |
| 11 | 119734332 | rs34051198  | A | G | NULL | 0.562176501 | NULL&M | Disease |
| 11 | 116613184 | rs180344    | C | T | NULL | 0.562176501 | NULL&M | Disease |
| 11 | 117592582 | rs12577828  | A | G | NULL | 0.56094545  | NULL&M | Disease |
| 11 | 119679659 | rs11828031  | A | G | NULL | 0.562176501 | NULL&M | Disease |
| 11 | 119813545 | rs1944502   | G | A | NULL | 0.562176501 | NULL&M | Disease |
| 11 | 120890960 | rs12785765  | C | A | NULL | 0.562176501 | NULL&M | Disease |
| 11 | 117493839 | rs17120968  | T | C | NULL | 0.562176501 | NULL&M | Disease |
| 11 | 117620050 | rs112571425 | C | T | NULL | 0.562176501 | NULL&M | Disease |
| 11 | 120566473 | rs78435918  | G | A | NULL | 0.562176501 | NULL&M | Disease |
| 11 | 120702026 | rs4936556   | T | C | NULL | 0.562176501 | NULL&M | Disease |
| 11 | 119297248 | rs117164546 | A | G | NULL | 0.562176501 | NULL&M | Disease |
| 11 | 120664625 | rs77454413  | A | G | NULL | 0.562176501 | NULL&M | Disease |
| 11 | 117727584 | rs11216585  | T | G | NULL | 0.562176501 | NULL&M | Disease |
| 11 | 117938674 | rs190143695 | C | A | NULL | 0.562176501 | NULL&M | Disease |
| 11 | 120650633 | rs17124324  | T | A | NULL | 0.562176501 | NULL&M | Disease |
| 11 | 117485422 | rs11216470  | T | C | NULL | 0.562176501 | NULL&M | Disease |
| 11 | 117603352 | rs113204414 | C | T | NULL | 0.562176501 | NULL&M | Disease |
| 11 | 117605731 | rs61903855  | C | G | NULL | 0.562176501 | NULL&M | Disease |
| 11 | 120416923 | rs2252494   | A | G | NULL | 0.563406786 | NULL&M | Disease |
| 11 | 116673315 | rs12791103  | T | G | NULL | 0.563406786 | NULL&M | Disease |
| 11 | 116722171 | rs676234    | G | A | NULL | 0.562176501 | NULL&M | Disease |
| 11 | 116482449 | rs74365486  | A | C | NULL | 0.562176501 | NULL&M | Disease |
| 11 | 117092051 | rs78628783  | T | C | NULL | 0.563406786 | NULL&M | Disease |
| 11 | 117590895 | rs74621718  | G | C | NULL | 0.562176501 | NULL&M | Disease |
| 11 | 117590919 | rs78667446  | T | G | NULL | 0.562176501 | NULL&M | Disease |
| 11 | 120979833 | rs117889729 | G | C | NULL | 0.562176501 | NULL&M | Disease |
| 11 | 117070596 | rs2239678   | T | C | NULL | 0.563406786 | NULL&M | Disease |
| 11 | 117339893 | rs512443    | T | C | NULL | 0.563406786 | NULL&M | Disease |
| 11 | 119495219 | rs116057214 | G | A | NULL | 0.563406786 | NULL&M | Disease |
| 11 | 120864593 | rs10750179  | A | G | NULL | 0.563406786 | NULL&M | Disease |
| 11 | 116588909 | rs180378    | A | G | NULL | 0.563406786 | NULL&M | Disease |
| 11 | 116612659 | rs180346    | C | A | NULL | 0.563406786 | NULL&M | Disease |
| 11 | 117066353 | rs2269399   | C | G | NULL | 0.563406786 | NULL&M | Disease |
| 11 | 121010814 | rs116977890 | A | C | NULL | 0.562176501 | NULL&M | Disease |
| 11 | 116726651 | rs1241550   | C | T | NULL | 0.563406786 | NULL&M | Disease |
| 11 | 116729196 | rs541586    | C | T | NULL | 0.563406786 | NULL&M | Disease |
| 11 | 117080640 | rs11216315  | G | C | NULL | 0.563406786 | NULL&M | Disease |
| 11 | 116403905 | rs7925845   | G | A | NULL | 0.563406786 | NULL&M | Disease |
| 11 | 116428225 | rs12279486  | T | C | NULL | 0.563406786 | NULL&M | Disease |
| 11 | 118326218 | rs116954303 | A | G | NULL | 0.562176501 | NULL&M | Disease |
| 11 | 119673277 | rs111494641 | T | C | NULL | 0.563406786 | NULL&M | Disease |
| 11 | 121098681 | rs6589862   | A | G | NULL | 0.563406786 | NULL&M | Disease |
| 11 | 116485420 | rs80072373  | G | C | NULL | 0.563406786 | NULL&M | Disease |
| 11 | 117353294 | rs7942824   | T | G | NULL | 0.564636292 | NULL&M | Disease |
| 11 | 118632893 | rs6589690   | A | G | NULL | 0.564636292 | NULL&M | Disease |
| 11 | 120443297 | rs11599940  | A | G | NULL | 0.564636292 | NULL&M | Disease |
| 11 | 121088659 | rs637115    | A | G | NULL | 0.564636292 | NULL&M | Disease |
| 11 | 121088829 | rs478626    | A | G | NULL | 0.564636292 | NULL&M | Disease |
| 11 | 117604866 | rs111462461 | T | C | NULL | 0.563406786 | NULL&M | Disease |
| 11 | 119674095 | rs2368937   | C | T | NULL | 0.564636292 | NULL&M | Disease |
| 11 | 117413864 | rs678468    | C | T | NULL | 0.564636292 | NULL&M | Disease |
| 11 | 117590007 | rs12576975  | A | C | NULL | 0.563406786 | NULL&M | Disease |
| 11 | 117590811 | rs78080911  | G | A | NULL | 0.563406786 | NULL&M | Disease |
| 11 | 121117590 | rs145433737 | A | G | NULL | 0.563406786 | NULL&M | Disease |
| 11 | 117500448 | rs73012582  | A | G | NULL | 0.564636292 | NULL&M | Disease |
| 11 | 117092394 | rs80351364  | T | A | NULL | 0.564636292 | NULL&M | Disease |
| 11 | 117390488 | rs76467987  | C | T | NULL | 0.563406786 | NULL&M | Disease |
| 11 | 117789242 | rs3802870   | G | C | NULL | 0.564636292 | NULL&M | Disease |
| 11 | 117957258 | rs689264    | T | C | NULL | 0.564636292 | NULL&M | Disease |
| 11 | 118644323 | rs6589695   | C | G | NULL | 0.564636292 | NULL&M | Disease |
| 11 | 116234032 | rs575636    | G | A | NULL | 0.564636292 | NULL&M | Disease |
| 11 | 117586623 | rs948776    | C | A | NULL | 0.563406786 | NULL&M | Disease |
| 11 | 118870413 | rs10892319  | T | C | NULL | 0.564636292 | NULL&M | Disease |
| 11 | 119932930 | rs1320685   | C | G | NULL | 0.564636292 | NULL&M | Disease |
| 11 | 121088794 | rs648191    | A | G | NULL | 0.564636292 | NULL&M | Disease |
| 11 | 117351353 | rs577166    | T | C | NULL | 0.564636292 | NULL&M | Disease |
| 11 | 117501271 | rs7950396   | A | G | NULL | 0.564636292 | NULL&M | Disease |
| 11 | 116308634 | rs76477544  | G | A | NULL | 0.564636292 | NULL&M | Disease |
| 11 | 119818622 | rs10892501  | G | A | NULL | 0.565865003 | NULL&M | Disease |
| 11 | 121148641 | rs138536663 | C | T | NULL | 0.564636292 | NULL&M | Disease |
| 11 | 117583591 | rs74443315  | G | A | NULL | 0.564636292 | NULL&M | Disease |
| 11 | 118556995 | rs72999502  | C | T | NULL | 0.564636292 | NULL&M | Disease |
| 11 | 120081510 | rs138435357 | A | C | NULL | 0.564636292 | NULL&M | Disease |
| 11 | 120619586 | rs2852226   | A | G | NULL | 0.564636292 | NULL&M | Disease |
| 11 | 120936096 | rs10892666  | T | G | NULL | 0.565865003 | NULL&M | Disease |
| 11 | 121150291 | rs189832363 | T | C | NULL | 0.564636292 | NULL&M | Disease |
| 11 | 116665120 | rs45555231  | C | G | NULL | 0.564636292 | NULL&M | Disease |
| 11 | 118752178 | rs61150131  | C | T | NULL | 0.564636292 | NULL&M | Disease |
| 11 | 119762628 | rs143470629 | T | C | NULL | 0.564636292 | NULL&M | Disease |
| 11 | 116231840 | rs513935    | A | G | NULL | 0.565865003 | NULL&M | Disease |
| 11 | 116631690 | rs3741300   | A | G | NULL | 0.565865003 | NULL&M | Disease |
| 11 | 118058156 | rs6589651   | G | A | NULL | 0.565865003 | NULL&M | Disease |
| 11 | 120050959 | rs471776    | A | G | NULL | 0.564636292 | NULL&M | Disease |
| 11 | 120051363 | rs546441    | C | A | NULL | 0.564636292 | NULL&M | Disease |
| 11 | 120052037 | rs551843    | A | G | NULL | 0.564636292 | NULL&M | Disease |
| 11 | 116305930 | rs12293635  | C | G | NULL | 0.564636292 | NULL&M | Disease |
| 11 | 117591311 | rs77252250  | A | C | NULL | 0.564636292 | NULL&M | Disease |
| 11 | 118012623 | rs61900623  | T | C | NULL | 0.564636292 | NULL&M | Disease |
| 11 | 116461333 | rs11216024  | G | A | NULL | 0.565865003 | NULL&M | Disease |
| 11 | 116622958 | rs180329    | A | G | NULL | 0.565865003 | NULL&M | Disease |

|      |           |             |   |   |       |           |           |        |          |
|------|-----------|-------------|---|---|-------|-----------|-----------|--------|----------|
| 11   | 117890273 | rs2508449   | C | T | 0.95  | -7977.388 | -7977.892 | -0.503 | 2.34E-06 |
| 11   | 117890681 | rs1939127   | C | T | 0.95  | -7977.388 | -7977.892 | -0.503 | 2.34E-06 |
| 11   | 117891216 | rs2512156   | T | A | 0.95  | -7977.388 | -7977.892 | -0.503 | 2.34E-06 |
| 11   | 118238119 | rs11216859  | C | T | 1.052 | -7977.388 | -7977.891 | -0.503 | 2.34E-06 |
| 11   | 118711069 | rs538645    | C | T | 0.948 | -7977.388 | -7977.891 | -0.503 | 2.34E-06 |
| 11   | 120343033 | rs61898762  | G | T | 1.076 | -7977.388 | -7977.891 | -0.503 | 2.34E-06 |
| 11   | 119734332 | rs34051198  | A | G | 1.064 | -7977.388 | -7977.892 | -0.504 | 2.34E-06 |
| 11   | 116613184 | rs180344    | C | T | 0.952 | -7977.388 | -7977.893 | -0.505 | 2.33E-06 |
| 11   | 117592582 | rs12577828  | A | G | 0.939 | -7977.388 | -7977.893 | -0.505 | 2.33E-06 |
| 11   | 119679659 | rs11828031  | A | G | 0.947 | -7977.388 | -7977.893 | -0.505 | 2.33E-06 |
| 11   | 119813545 | rs1944502   | G | A | 1.05  | -7977.388 | -7977.893 | -0.505 | 2.33E-06 |
| 11   | 120890960 | rs12785765  | C | A | 1.066 | -7977.388 | -7977.895 | -0.506 | 2.33E-06 |
| 11   | 117493839 | rs17120968  | T | C | 0.931 | -7977.388 | -7977.895 | -0.507 | 2.33E-06 |
| 11   | 117620050 | rs112571425 | C | T | 0.939 | -7977.388 | -7977.895 | -0.507 | 2.33E-06 |
| 11   | 120566473 | rs78435918  | G | A | 0.931 | -7977.388 | -7977.895 | -0.507 | 2.33E-06 |
| 11   | 120702026 | rs4936556   | T | C | 1.051 | -7977.388 | -7977.895 | -0.507 | 2.33E-06 |
| 11   | 119297248 | rs117164546 | A | G | 0.934 | -7977.388 | -7977.897 | -0.508 | 2.33E-06 |
| 11   | 120664625 | rs77454413  | A | G | 0.948 | -7977.388 | -7977.897 | -0.508 | 2.33E-06 |
| 11   | 117727584 | rs11216585  | T | G | 1.073 | -7977.388 | -7977.897 | -0.509 | 2.33E-06 |
| 11   | 117938674 | rs190143695 | C | A | 1.069 | -7977.388 | -7977.898 | -0.509 | 2.33E-06 |
| 11   | 120650633 | rs17124324  | T | A | 0.932 | -7977.388 | -7977.897 | -0.509 | 2.33E-06 |
| 11   | 117485422 | rs11216470  | T | C | 0.931 | -7977.388 | -7977.899 | -0.51  | 2.32E-06 |
| 11   | 117603352 | rs113204414 | C | T | 0.94  | -7977.388 | -7977.898 | -0.51  | 2.32E-06 |
| 11   | 117605731 | rs61903855  | C | G | 1.075 | -7977.388 | -7977.898 | -0.51  | 2.32E-06 |
| 11   | 120416923 | rs2252494   | A | G | 0.949 | -7977.388 | -7977.899 | -0.51  | 2.32E-06 |
| 11   | 116673315 | rs12791103  | T | G | 1.068 | -7977.388 | -7977.9   | -0.512 | 2.32E-06 |
| 11   | 116722171 | rs676234    | G | A | 0.932 | -7977.388 | -7977.9   | -0.512 | 2.32E-06 |
| 11   | 116482449 | rs74365486  | A | C | 1.067 | -7977.388 | -7977.902 | -0.513 | 2.32E-06 |
| 11   | 117092051 | rs78628783  | T | C | 1.073 | -7977.388 | -7977.901 | -0.513 | 2.32E-06 |
| 11   | 117590895 | rs74621718  | G | C | 0.94  | -7977.388 | -7977.901 | -0.513 | 2.32E-06 |
| 11   | 117590919 | rs78667446  | T | G | 0.94  | -7977.388 | -7977.901 | -0.513 | 2.32E-06 |
| 11   | 120979833 | rs117889729 | G | C | 0.935 | -7977.388 | -7977.901 | -0.513 | 2.32E-06 |
| 11   | 117070596 | rs2239678   | T | C | 1.072 | -7977.388 | -7977.902 | -0.514 | 2.31E-06 |
| 11   | 117339893 | rs512443    | T | C | 0.934 | -7977.388 | -7977.902 | -0.514 | 2.31E-06 |
| 11   | 119495219 | rs116057214 | G | A | 1.067 | -7977.388 | -7977.902 | -0.514 | 2.31E-06 |
| 11   | 120864593 | rs10750179  | A | G | 0.947 | -7977.388 | -7977.903 | -0.514 | 2.31E-06 |
| 11   | 116588909 | rs180378    | A | G | 1.051 | -7977.388 | -7977.903 | -0.515 | 2.31E-06 |
| 11</ |           |             |   |   |       |           |           |        |          |

|    |           |              |   |   |      |             |        |         |
|----|-----------|--------------|---|---|------|-------------|--------|---------|
| 11 | 117388656 | rs59346420   | T | C | NULL | 0.564636292 | NULL&M | Disease |
| 11 | 117068444 | rs74385934   | A | G | NULL | 0.565865003 | NULL&M | Disease |
| 11 | 117081709 | rs1263499    | G | A | NULL | 0.565865003 | NULL&M | Disease |
| 11 | 117958179 | rs10892212   | A | T | NULL | 0.565865003 | NULL&M | Disease |
| 11 | 118152252 | rs117117171  | A | T | NULL | 0.564636292 | NULL&M | Disease |
| 11 | 118938882 | rs670526     | C | T | NULL | 0.565865003 | NULL&M | Disease |
| 11 | 120093920 | rs12226432   | C | A | NULL | 0.565865003 | NULL&M | Disease |
| 11 | 120464049 | rs12421186   | T | C | NULL | 0.565865003 | NULL&M | Disease |
| 11 | 116240253 | rs541874     | T | C | NULL | 0.565865003 | NULL&M | Disease |
| 11 | 119652997 | rs142774084  | A | G | NULL | 0.565865003 | NULL&M | Disease |
| 11 | 116486664 | rs3016347    | C | G | NULL | 0.565865003 | NULL&M | Disease |
| 11 | 118057867 | rs7103366    | G | T | NULL | 0.565865003 | NULL&M | Disease |
| 11 | 118928393 | rs471028     | C | G | NULL | 0.565865003 | NULL&M | Disease |
| 11 | 118932610 | rs647432     | T | C | NULL | 0.565865003 | NULL&M | Disease |
| 11 | 117577527 | rs12574878   | T | C | NULL | 0.565865003 | NULL&M | Disease |
| 11 | 11757558  | rs12576082   | A | T | NULL | 0.565865003 | NULL&M | Disease |
| 11 | 117577909 | rs12577066   | G | A | NULL | 0.565865003 | NULL&M | Disease |
| 11 | 117578314 | rs113570704  | T | C | NULL | 0.565865003 | NULL&M | Disease |
| 11 | 117579516 | rs1310160088 | T | C | NULL | 0.565865003 | NULL&M | Disease |
| 11 | 117579607 | rs78696045   | T | A | NULL | 0.565865003 | NULL&M | Disease |
| 11 | 119507468 | rs4938697    | C | T | NULL | 0.567092905 | NULL&M | Disease |
| 11 | 117033808 | rs79118964   | T | C | NULL | 0.565865003 | NULL&M | Disease |
| 11 | 119577632 | rs7104655    | A | G | NULL | 0.565865003 | NULL&M | Disease |
| 11 | 116630600 | rs918143     | T | C | NULL | 0.567092905 | NULL&M | Disease |
| 11 | 116557882 | rs11216093   | C | A | NULL | 0.567092905 | NULL&M | Disease |
| 11 | 117566305 | rs55973262   | C | G | NULL | 0.567092905 | NULL&M | Disease |
| 11 | 117586881 | rs948774     | A | T | NULL | 0.565865003 | NULL&M | Disease |
| 11 | 117586942 | rs948773     | A | G | NULL | 0.565865003 | NULL&M | Disease |
| 11 | 117727742 | rs11216586   | C | G | NULL | 0.567092905 | NULL&M | Disease |
| 11 | 116226290 | rs577941     | A | G | NULL | 0.567092905 | NULL&M | Disease |
| 11 | 117113511 | rs117117915  | T | C | NULL | 0.565865003 | NULL&M | Disease |
| 11 | 118214267 | rs2071381    | A | G | NULL | 0.567092905 | NULL&M | Disease |
| 11 | 119818789 | rs895653     | A | T | NULL | 0.567092905 | NULL&M | Disease |
| 11 | 117388657 | rs77944184   | A | G | NULL | 0.567092905 | NULL&M | Disease |
| 11 | 118835272 | rs67533649   | G | A | NULL | 0.567092905 | NULL&M | Disease |
| 11 | 120473450 | rs139831408  | T | C | NULL | 0.565865003 | NULL&M | Disease |
| 11 | 116306324 | rs79892107   | T | C | NULL | 0.567092905 | NULL&M | Disease |
| 11 | 118709275 | rs187164533  | A | G | NULL | 0.565865003 | NULL&M | Disease |
| 11 | 119654894 | rs77020062   | T | C | NULL | 0.565865003 | NULL&M | Disease |
| 11 | 119768054 | rs11217556   | A | C | NULL | 0.567092905 | NULL&M | Disease |
| 11 | 116235005 | rs495430     | A | G | NULL | 0.568319983 | NULL&M | Disease |
| 11 | 117380309 | rs139254418  | G | A | NULL | 0.567092905 | NULL&M | Disease |
| 11 | 118533042 | rs142438429  | T | C | NULL | 0.567092905 | NULL&M | Disease |
| 11 | 120903752 | rs2000528    | G | A | NULL | 0.567092905 | NULL&M | Disease |
| 11 | 116683862 | rs75318540   | T | C | NULL | 0.567092905 | NULL&M | Disease |
| 11 | 116737736 | rs675834     | A | T | NULL | 0.567092905 | NULL&M | Disease |
| 11 | 117671216 | rs76921569   | A | C | NULL | 0.567092905 | NULL&M | Disease |
| 11 | 117675125 | rs79046029   | T | C | NULL | 0.567092905 | NULL&M | Disease |
| 11 | 118835677 | rs4420279    | A | C | NULL | 0.568319983 | NULL&M | Disease |
| 11 | 120790033 | rs78621482   | G | C | NULL | 0.567092905 | NULL&M | Disease |
| 11 | 117587186 | rs4938431    | G | A | NULL | 0.567092905 | NULL&M | Disease |
| 11 | 117587345 | rs4938432    | A | G | NULL | 0.567092905 | NULL&M | Disease |
| 11 | 116279427 | rs580965     | C | T | NULL | 0.568319983 | NULL&M | Disease |
| 11 | 116294634 | rs471840     | T | C | NULL | 0.568319983 | NULL&M | Disease |
| 11 | 117727740 | rs115524104  | C | T | NULL | 0.568319983 | NULL&M | Disease |
| 11 | 119691069 | rs1447149    | A | G | NULL | 0.568319983 | NULL&M | Disease |
| 11 | 116601711 | rs108533     | T | A | NULL | 0.568319983 | NULL&M | Disease |
| 11 | 117319240 | rs118110450  | C | A | NULL | 0.567092905 | NULL&M | Disease |
| 11 | 117672225 | rs2298649    | G | A | NULL | 0.568319983 | NULL&M | Disease |
| 11 | 117363426 | rs11216425   | A | C | NULL | 0.568319983 | NULL&M | Disease |
| 11 | 117957750 | rs600638     | T | C | NULL | 0.568319983 | NULL&M | Disease |
| 11 | 116240625 | rs501652     | G | A | NULL | 0.568319983 | NULL&M | Disease |
| 11 | 117481108 | rs11824398   | A | G | NULL | 0.567092905 | NULL&M | Disease |
| 11 | 117604158 | rs1939984    | T | A | NULL | 0.568319983 | NULL&M | Disease |
| 11 | 120872163 | rs141734119  | G | A | NULL | 0.567092905 | NULL&M | Disease |
| 11 | 116684744 | rs2849167    | G | A | NULL | 0.568319983 | NULL&M | Disease |
| 11 | 118936910 | rs471000     | T | C | NULL | 0.568319983 | NULL&M | Disease |
| 11 | 119509845 | rs117434119  | T | C | NULL | 0.568319983 | NULL&M | Disease |
| 11 | 119580472 | rs4245204    | A | G | NULL | 0.568319983 | NULL&M | Disease |
| 11 | 120019335 | rs548215     | A | G | NULL | 0.568319983 | NULL&M | Disease |
| 11 | 117547710 | rs74361939   | A | G | NULL | 0.568319983 | NULL&M | Disease |
| 11 | 117600506 | rs78036667   | T | C | NULL | 0.567092905 | NULL&M | Disease |
| 11 | 118751898 | rs60651507   | A | G | NULL | 0.568319983 | NULL&M | Disease |
| 11 | 121081509 | rs588209     | G | C | NULL | 0.568319983 | NULL&M | Disease |
| 11 | 117885694 | rs2512151    | G | A | NULL | 0.568319983 | NULL&M | Disease |
| 11 | 119923305 | rs147136343  | T | A | NULL | 0.568319983 | NULL&M | Disease |
| 11 | 120556631 | rs78584663   | G | A | NULL | 0.568319983 | NULL&M | Disease |
| 11 | 120556817 | rs11606521   | G | A | NULL | 0.568319983 | NULL&M | Disease |
| 11 | 117362198 | rs2013131    | C | T | NULL | 0.569546224 | NULL&M | Disease |
| 11 | 117564845 | rs112266857  | T | C | NULL | 0.568319983 | NULL&M | Disease |
| 11 | 121106570 | rs7108971    | A | T | NULL | 0.569546224 | NULL&M | Disease |
| 11 | 117586698 | rs948775     | C | T | NULL | 0.568319983 | NULL&M | Disease |
| 11 | 120421474 | rs61900898   | T | G | NULL | 0.569546224 | NULL&M | Disease |
| 11 | 121141095 | rs78768102   | G | A | NULL | 0.568319983 | NULL&M | Disease |
| 11 | 117088082 | rs1339633702 | T | C | NULL | 0.569546224 | NULL&M | Disease |
| 11 | 117610811 | rs113586459  | C | A | NULL | 0.568319983 | NULL&M | Disease |
| 11 | 118605352 | rs76478216   | C | T | NULL | 0.569546224 | NULL&M | Disease |
| 11 | 117593858 | rs78437760   | G | T | NULL | 0.568319983 | NULL&M | Disease |
| 11 | 117594170 | rs77047087   | A | G | NULL | 0.568319983 | NULL&M | Disease |
| 11 | 117594288 | rs76628593   | T | G | NULL | 0.568319983 | NULL&M | Disease |
| 11 | 117596635 | rs79506234   | T | C | NULL | 0.568319983 | NULL&M | Disease |
| 11 | 117597810 | rs77746497   | A | G | NULL | 0.568319983 | NULL&M | Disease |
| 11 | 118296658 | rs79481471   | A | G | NULL | 0.568319983 | NULL&M | Disease |
| 11 | 118629143 | rs475946     | T | C | NULL | 0.569546224 | NULL&M | Disease |
| 11 | 117233378 | rs139352710  | A | G | NULL | 0.569546224 | NULL&M | Disease |
| 11 | 116698963 | rs2727788    | A | C | NULL | 0.569546224 | NULL&M | Disease |

|    |           |              |   |   |       |           |           |        |          |
|----|-----------|--------------|---|---|-------|-----------|-----------|--------|----------|
| 11 | 117388656 | rs59346420   | T | C | 0.931 | -7977.388 | -7977.921 | -0.533 | 2.27E-06 |
| 11 | 117068444 | rs74385934   | A | G | 1.071 | -7977.388 | -7977.922 | -0.534 | 2.27E-06 |
| 11 | 117081709 | rs1263499    | G | A | 0.933 | -7977.388 | -7977.922 | -0.534 | 2.27E-06 |
| 11 | 117958179 | rs10892212   | A | T | 0.931 | -7977.388 | -7977.923 | -0.534 | 2.27E-06 |
| 11 | 118152252 | rs117117171  | A | T | 0.935 | -7977.388 | -7977.922 | -0.534 | 2.27E-06 |
| 11 | 118938882 | rs670526     | C | T | 1.06  | -7977.388 | -7977.922 | -0.534 | 2.27E-06 |
| 11 | 120093920 | rs12226432   | C | A | 0.932 | -7977.388 | -7977.922 | -0.534 | 2.27E-06 |
| 11 | 120464049 | rs12421186   | T | C | 0.951 | -7977.388 | -7977.923 | -0.535 | 2.27E-06 |
| 11 | 116240253 | rs541874     | T | C | 1.049 | -7977.388 | -7977.925 | -0.536 | 2.26E-06 |
| 11 | 119652997 | rs142774084  | A | G | 0.936 | -7977.388 | -7977.924 | -0.536 | 2.26E-06 |
| 11 | 116486664 | rs3016347    | C | G | 0.941 | -7977.388 | -7977.925 | -0.537 | 2.26E-06 |
| 11 | 118057867 | rs7103366    | G | T | 1.054 | -7977.388 | -7977.925 | -0.537 | 2.26E-06 |
| 11 | 118928393 | rs471028     | C | G | 1.06  | -7977.388 | -7977.925 | -0.537 | 2.26E-06 |
| 11 | 118932610 | rs647432     | T | C | 1.06  | -7977.388 | -7977.925 | -0.537 | 2.26E-06 |
| 11 | 117577527 | rs12574878   | T | C | 0.946 | -7977.388 | -7977.926 | -0.538 | 2.26E-06 |
| 11 | 11757558  | rs12576082   | A | T | 0.946 | -7977.388 | -7977.926 | -0.538 | 2.26E-06 |
| 11 | 117577909 | rs12577066   | G | A | 0.946 | -7977.388 | -7977.926 | -0.538 | 2.26E-06 |
| 11 | 117578314 | rs113570704  | T | C | 0.946 | -7977.388 | -7977.926 | -0.538 | 2.26E-06 |
| 11 | 117579516 | rs1310160088 | T | C | 0.946 | -7977.388 | -7977.926 | -0.538 | 2.26E-06 |
| 11 | 117579607 | rs78696045   | T | A | 0.946 | -7977.388 | -7977.926 | -0.538 | 2.26E-06 |
| 11 | 119507468 | rs4938697    | C | T | 1.05  | -7977.388 | -7977.927 | -0.539 | 2.26E-06 |
| 11 | 117033808 | rs79118964   | T | C | 0.934 | -7977.388 | -7977.928 | -0.54  | 2.25E-06 |
| 11 | 119577632 | rs7104655    | A | G | 0.932 | -7977.388 | -7977.928 | -0.54  | 2.25E-06 |
| 11 | 116630600 | rs918143     | T | C | 0.953 | -7977.388 | -7977.93  | -0.541 | 2.25E-06 |
| 11 | 116557882 | rs11216093   | C | A | 0.94  | -7977.388 | -7977.93  | -0.542 | 2.25E-06 |
| 11 | 117566305 | rs55973262   | C | G | 0.936 | -7977.388 | -7977.93  | -0.542 | 2.25E-06 |
| 11 | 117586881 | rs948774     | A | T | 0.944 | -7977.388 | -7977.93  | -0.542 | 2.25E-06 |
| 11 | 117586942 | rs948773     | A | G | 0.944 | -7977.388 | -7977.93  | -0.542 | 2.25E-06 |
| 11 | 117727742 | rs11216586   | C | G | 1.071 | -7977.388 | -7977.93  | -0.542 | 2.25E-06 |
| 11 | 116226290 | rs577941     | A | G | 1.06  | -7977.388 | -7977.931 | -0.543 | 2.25E-06 |
| 11 | 117113511 | rs117117915  | T | C | 0.937 | -7977.388 | -7977.931 | -0.543 | 2.25E-06 |
| 11 | 118214267 | rs2071381    | A | G | 1.051 | -7977.388 | -7977.931 | -0.543 | 2.25E-06 |
| 11 | 119818789 | rs895653     | A | T | 0.952 | -7977.388 | -7977.932 | -0.543 | 2.25E-06 |
| 11 | 117388657 | rs77944184   | A | G | 0.932 | -7977.388 | -7977.933 | -0.544 | 2.25E-06 |
| 11 | 118835272 | rs67533649   | G | A | 1.057 | -7977.388 | -7977.932 | -0.544 | 2.25E-06 |
| 11 | 120473450 | rs139831408  | T | C | 1.069 | -7977.388 | -7977.932 | -0.544 | 2.25E-06 |
| 11 | 116306324 | rs79892107   | T | C | 1.07  | -7977.388 | -7977.934 | -0.545 | 2.24E-06 |
| 11 |           |              |   |   |       |           |           |        |          |

|    |           |             |   |   |      |             |        |         |
|----|-----------|-------------|---|---|------|-------------|--------|---------|
| 11 | 117333952 | rs4938384   | A | G | NULL | 0.569546224 | NULL&M | Disease |
| 11 | 117973058 | rs11216751  | G | T | NULL | 0.569546224 | NULL&M | Disease |
| 11 | 116519655 | rs516226    | T | C | NULL | 0.569546224 | NULL&M | Disease |
| 11 | 117307306 | rs73018318  | T | G | NULL | 0.568319983 | NULL&M | Disease |
| 11 | 117383816 | rs12419495  | C | T | NULL | 0.569546224 | NULL&M | Disease |
| 11 | 119658388 | rs56246162  | G | C | NULL | 0.568319983 | NULL&M | Disease |
| 11 | 119805958 | rs10790355  | T | C | NULL | 0.569546224 | NULL&M | Disease |
| 11 | 117590322 | rs7106419   | G | T | NULL | 0.569546224 | NULL&M | Disease |
| 11 | 119724144 | rs506842    | C | G | NULL | 0.569546224 | NULL&M | Disease |
| 11 | 116216432 | rs570448    | C | G | NULL | 0.569546224 | NULL&M | Disease |
| 11 | 116578982 | rs61905067  | G | A | NULL | 0.569546224 | NULL&M | Disease |
| 11 | 117593119 | rs11216515  | C | T | NULL | 0.569546224 | NULL&M | Disease |
| 11 | 117953051 | rs2051479   | G | A | NULL | 0.570771612 | NULL&M | Disease |
| 11 | 119236751 | rs2195526   | T | C | NULL | 0.570771612 | NULL&M | Disease |
| 11 | 119334629 | rs11217297  | A | G | NULL | 0.570771612 | NULL&M | Disease |
| 11 | 117961309 | rs654176    | G | C | NULL | 0.569546224 | NULL&M | Disease |
| 11 | 120437188 | rs4278519   | T | C | NULL | 0.570771612 | NULL&M | Disease |
| 11 | 117570168 | rs112845302 | A | G | NULL | 0.570771612 | NULL&M | Disease |
| 11 | 117868517 | rs4252314   | G | A | NULL | 0.569546224 | NULL&M | Disease |
| 11 | 118232026 | rs77806521  | T | C | NULL | 0.569546224 | NULL&M | Disease |
| 11 | 119824803 | rs72994633  | C | T | NULL | 0.569546224 | NULL&M | Disease |
| 11 | 117179535 | rs28989473  | A | G | NULL | 0.569546224 | NULL&M | Disease |
| 11 | 117300040 | rs3889570   | C | T | NULL | 0.570771612 | NULL&M | Disease |
| 11 | 118932445 | rs636283    | T | C | NULL | 0.570771612 | NULL&M | Disease |
| 11 | 116198542 | rs113708750 | T | C | NULL | 0.570771612 | NULL&M | Disease |
| 11 | 116463208 | rs12288729  | C | G | NULL | 0.569546224 | NULL&M | Disease |
| 11 | 117584740 | rs2187183   | A | G | NULL | 0.569546224 | NULL&M | Disease |
| 11 | 117584761 | rs2187182   | T | G | NULL | 0.569546224 | NULL&M | Disease |
| 11 | 117584793 | rs11216512  | G | C | NULL | 0.569546224 | NULL&M | Disease |
| 11 | 117585030 | rs4938427   | A | G | NULL | 0.569546224 | NULL&M | Disease |
| 11 | 117585035 | rs4936396   | A | G | NULL | 0.569546224 | NULL&M | Disease |
| 11 | 117585338 | rs4938429   | C | A | NULL | 0.569546224 | NULL&M | Disease |
| 11 | 117585370 | rs4936397   | G | A | NULL | 0.569546224 | NULL&M | Disease |
| 11 | 117585523 | rs7930615   | G | A | NULL | 0.569546224 | NULL&M | Disease |
| 11 | 117585641 | rs4359247   | G | C | NULL | 0.569546224 | NULL&M | Disease |
| 11 | 117585918 | rs4255570   | C | T | NULL | 0.569546224 | NULL&M | Disease |
| 11 | 117585977 | rs4245171   | A | G | NULL | 0.569546224 | NULL&M | Disease |
| 11 | 117585981 | rs4245172   | C | T | NULL | 0.569546224 | NULL&M | Disease |
| 11 | 117586129 | rs4245173   | T | C | NULL | 0.569546224 | NULL&M | Disease |
| 11 | 117586178 | rs4938430   | C | G | NULL | 0.569546224 | NULL&M | Disease |
| 11 | 120171165 | rs1941410   | A | G | NULL | 0.570771612 | NULL&M | Disease |
| 11 | 120278477 | rs34172482  | G | A | NULL | 0.570771612 | NULL&M | Disease |
| 11 | 120989762 | rs12280641  | A | G | NULL | 0.570771612 | NULL&M | Disease |
| 11 | 116674503 | rs625524    | A | G | NULL | 0.569546224 | NULL&M | Disease |
| 11 | 117092886 | rs6589606   | T | C | NULL | 0.570771612 | NULL&M | Disease |
| 11 | 117881937 | rs11216675  | T | C | NULL | 0.569546224 | NULL&M | Disease |
| 11 | 120888244 | rs116981723 | T | C | NULL | 0.569546224 | NULL&M | Disease |
| 11 | 117647145 | rs61905348  | T | G | NULL | 0.570771612 | NULL&M | Disease |
| 11 | 120342855 | rs61898761  | G | A | NULL | 0.570771612 | NULL&M | Disease |
| 11 | 116778293 | rs79326407  | T | C | NULL | 0.570771612 | NULL&M | Disease |
| 11 | 120871963 | rs676426    | A | G | NULL | 0.570771612 | NULL&M | Disease |
| 11 | 116495780 | rs112549212 | C | T | NULL | 0.570771612 | NULL&M | Disease |
| 11 | 119782437 | rs146204458 | G | A | NULL | 0.569546224 | NULL&M | Disease |
| 11 | 116280688 | rs533848    | T | A | NULL | 0.570771612 | NULL&M | Disease |
| 11 | 118577614 | rs947931    | G | T | NULL | 0.570771612 | NULL&M | Disease |
| 11 | 120787752 | rs3018285   | C | T | NULL | 0.570771612 | NULL&M | Disease |
| 11 | 116801422 | rs12799198  | T | C | NULL | 0.571996133 | NULL&M | Disease |
| 11 | 117150502 | rs117013687 | T | C | NULL | 0.569546224 | NULL&M | Disease |
| 11 | 117392722 | rs55753209  | A | G | NULL | 0.570771612 | NULL&M | Disease |
| 11 | 118058358 | rs6589652   | G | A | NULL | 0.571996133 | NULL&M | Disease |
| 11 | 120630452 | rs7112522   | G | A | NULL | 0.570771612 | NULL&M | Disease |
| 11 | 116697066 | rs2849174   | A | G | NULL | 0.571996133 | NULL&M | Disease |
| 11 | 117095283 | rs59781045  | T | C | NULL | 0.570771612 | NULL&M | Disease |
| 11 | 120873076 | rs1621211   | A | G | NULL | 0.571996133 | NULL&M | Disease |
| 11 | 116557155 | rs2156120   | G | A | NULL | 0.571996133 | NULL&M | Disease |
| 11 | 116589127 | rs180377    | T | C | NULL | 0.571996133 | NULL&M | Disease |
| 11 | 117675364 | rs60942267  | T | G | NULL | 0.570771612 | NULL&M | Disease |
| 11 | 118150259 | rs17540777  | G | T | NULL | 0.571996133 | NULL&M | Disease |
| 11 | 118224123 | rs73018291  | A | G | NULL | 0.570771612 | NULL&M | Disease |
| 11 | 119658314 | rs76173441  | C | G | NULL | 0.570771612 | NULL&M | Disease |
| 11 | 120923495 | rs10502245  | A | G | NULL | 0.571996133 | NULL&M | Disease |
| 11 | 120923899 | rs10892665  | G | C | NULL | 0.571996133 | NULL&M | Disease |
| 11 | 116216072 | rs34166664  | G | C | NULL | 0.571996133 | NULL&M | Disease |
| 11 | 117597375 | rs948103    | C | A | NULL | 0.570771612 | NULL&M | Disease |
| 11 | 117599235 | rs1942925   | G | A | NULL | 0.570771612 | NULL&M | Disease |
| 11 | 117599647 | rs1942927   | G | A | NULL | 0.570771612 | NULL&M | Disease |
| 11 | 118604678 | rs493720    | T | C | NULL | 0.571996133 | NULL&M | Disease |
| 11 | 118605127 | rs526850    | G | T | NULL | 0.571996133 | NULL&M | Disease |
| 11 | 118920453 | rs673768    | T | C | NULL | 0.571996133 | NULL&M | Disease |
| 11 | 116596174 | rs180365    | T | C | NULL | 0.571996133 | NULL&M | Disease |
| 11 | 118850707 | rs4938605   | A | G | NULL | 0.571996133 | NULL&M | Disease |
| 11 | 118866072 | rs11217118  | A | G | NULL | 0.571996133 | NULL&M | Disease |
| 11 | 119452937 | rs144611969 | A | G | NULL | 0.570771612 | NULL&M | Disease |
| 11 | 120932667 | rs11601887  | C | T | NULL | 0.571996133 | NULL&M | Disease |
| 11 | 120950752 | rs11218137  | C | T | NULL | 0.571996133 | NULL&M | Disease |
| 11 | 116481175 | rs111527819 | A | G | NULL | 0.570771612 | NULL&M | Disease |
| 11 | 116598649 | rs180361    | T | C | NULL | 0.571996133 | NULL&M | Disease |
| 11 | 116365351 | rs4938274   | A | G | NULL | 0.571996133 | NULL&M | Disease |
| 11 | 116492477 | rs78577252  | T | C | NULL | 0.570771612 | NULL&M | Disease |
| 11 | 117335991 | rs663191    | T | C | NULL | 0.571996133 | NULL&M | Disease |
| 11 | 117336947 | rs677954    | T | C | NULL | 0.571996133 | NULL&M | Disease |
| 11 | 117668060 | rs112872285 | G | G | NULL | 0.571996133 | NULL&M | Disease |
| 11 | 118644213 | rs1790187   | A | G | NULL | 0.571996133 | NULL&M | Disease |
| 11 | 117458169 | rs117273824 | T | C | NULL | 0.571996133 | NULL&M | Disease |
| 11 | 119457720 | rs61901067  | G | A | NULL | 0.571996133 | NULL&M | Disease |
| 11 | 121004439 | rs2155465   | G | C | NULL | 0.571996133 | NULL&M | Disease |

|    |           |             |   |   |       |           |           |        |          |
|----|-----------|-------------|---|---|-------|-----------|-----------|--------|----------|
| 11 | 117333952 | rs4938384   | A | G | 0.936 | -7977.388 | -7977.953 | -0.565 | 2.20E-06 |
| 11 | 117973058 | rs11216751  | G | T | 0.938 | -7977.388 | -7977.953 | -0.565 | 2.20E-06 |
| 11 | 116519655 | rs516226    | T | C | 0.947 | -7977.388 | -7977.954 | -0.566 | 2.20E-06 |
| 11 | 117307306 | rs73018318  | T | G | 0.95  | -7977.388 | -7977.954 | -0.566 | 2.20E-06 |
| 11 | 117383816 | rs12419495  | C | T | 0.934 | -7977.388 | -7977.955 | -0.566 | 2.20E-06 |
| 11 | 119658388 | rs56246162  | G | C | 1.055 | -7977.388 | -7977.954 | -0.566 | 2.20E-06 |
| 11 | 119805958 | rs10790355  | T | C | 1.052 | -7977.388 | -7977.954 | -0.566 | 2.20E-06 |
| 11 | 117590322 | rs7106419   | G | T | 0.949 | -7977.388 | -7977.956 | -0.567 | 2.19E-06 |
| 11 | 119724144 | rs506842    | C | G | 0.953 | -7977.388 | -7977.955 | -0.567 | 2.19E-06 |
| 11 | 116216432 | rs570448    | C | G | 1.059 | -7977.388 | -7977.956 | -0.568 | 2.19E-06 |
| 11 | 116578982 | rs61905067  | G | A | 0.94  | -7977.388 | -7977.957 | -0.568 | 2.19E-06 |
| 11 | 117593119 | rs11216515  | C | T | 1.057 | -7977.388 | -7977.956 | -0.568 | 2.19E-06 |
| 11 | 117953051 | rs2051479   | G | A | 1.052 | -7977.388 | -7977.956 | -0.568 | 2.19E-06 |
| 11 | 119236751 | rs2195526   | T | C | 1.057 | -7977.388 | -7977.957 | -0.568 | 2.19E-06 |
| 11 | 119334629 | rs11217297  | A | G | 0.945 | -7977.388 | -7977.956 | -0.568 | 2.19E-06 |
| 11 | 117961309 | rs654176    | G | C | 1.069 | -7977.388 | -7977.957 | -0.569 | 2.19E-06 |
| 11 | 120437188 | rs4278519   | T | C | 1.049 | -7977.388 | -7977.957 | -0.569 | 2.19E-06 |
| 11 | 117570168 | rs112845302 | A | G | 0.937 | -7977.388 | -7977.958 | -0.57  | 2.19E-06 |
| 11 | 117868517 | rs4252314   | G | A | 1.071 | -7977.388 | -7977.958 | -0.57  | 2.19E-06 |
| 11 | 118232026 | rs77806521  | T | C | 1.063 | -7977.388 | -7977.958 | -0.57  | 2.19E-06 |
| 11 | 119824803 | rs72994633  | C | T | 0.936 | -7977.388 | -7977.958 | -0.57  | 2.19E-06 |
| 11 | 117179535 | rs28989473  | A | G | 0.934 | -7977.388 | -7977.959 | -0.571 | 2.19E-06 |
| 11 | 117300040 | rs3889570   | C | T | 1.049 | -7977.388 | -7977.959 | -0.571 | 2.19E-06 |
| 11 | 118932445 | rs636283    | T | C | 1.059 | -7977.388 | -7977.959 | -0.571 | 2.19E-06 |
| 11 | 116198542 | rs113708750 | T | C | 1.071 | -7977.388 | -7977.96  | -0.572 | 2.18E-06 |
| 11 | 116463208 | rs12288729  | C | G | 0.934 | -7977.388 | -7977.96  | -0.572 | 2.18E-06 |
| 11 | 117584740 | rs2187183   | A | G | 0.95  | -7977.388 | -7977.961 | -0.572 | 2.18E-06 |
| 11 | 117584761 | rs2187182   | T | G | 0.95  | -7977.388 | -7977.961 | -0.572 | 2.18E-06 |
| 11 | 117584793 | rs11216512  | G | C | 0.95  | -7977.388 | -7977.961 | -0.572 | 2.18E-06 |
| 11 | 117585030 | rs4938427   | A | G | 0.95  | -7977.388 | -7977.961 | -0.572 | 2.18E-06 |
| 11 | 117585035 | rs4936396   | A | G | 0.95  | -7977.388 | -7977.961 | -0.572 | 2.18E-06 |
| 11 | 117585338 | rs4938429   | C | A | 0.95  | -7977.388 | -7977.961 | -0.572 | 2.18E-06 |
| 11 | 117585370 | rs4936397   | G | A | 0.95  | -7977.388 | -7977.961 | -0.572 | 2.18E-06 |
| 11 | 117585523 | rs7930615   | G | A | 0.95  | -7977.388 | -7977.961 | -0.572 | 2.18E-06 |
| 11 | 117585641 | rs4359247   | G | C | 0.95  | -7977.388 | -7977.961 | -0.572 | 2.18E-06 |
| 11 | 117585918 | rs4255570   | C | T | 0.95  | -7977.388 | -7977.961 | -0.572 | 2.18E-06 |
| 11 | 117585977 | rs4245171   | A | G | 0.95  | -7977.388 | -7977.961 | -0.572 | 2.18E-06 |
| 11 | 117585981 | rs4245172   | C |   |       |           |           |        |          |

|    |           |              |   |   |      |             |        |         |
|----|-----------|--------------|---|---|------|-------------|--------|---------|
| 11 | 116496416 | rs73578545   | C | T | NULL | 0.571996133 | NULL&M | Disease |
| 11 | 117600518 | rs61903853   | G | T | NULL | 0.571996133 | NULL&M | Disease |
| 11 | 121075781 | rs117986469  | A | C | NULL | 0.571996133 | NULL&M | Disease |
| 11 | 118898319 | rs741811     | A | G | NULL | 0.573219773 | NULL&M | Disease |
| 11 | 121064524 | rs11218199   | T | C | NULL | 0.571996133 | NULL&M | Disease |
| 11 | 117070691 | rs526602     | A | G | NULL | 0.571996133 | NULL&M | Disease |
| 11 | 117801857 | rs73024419   | T | C | NULL | 0.573219773 | NULL&M | Disease |
| 11 | 117842743 | rs11216658   | C | G | NULL | 0.573219773 | NULL&M | Disease |
| 11 | 119870442 | rs78914290   | T | C | NULL | 0.571996133 | NULL&M | Disease |
| 11 | 116302939 | rs12226676   | G | T | NULL | 0.573219773 | NULL&M | Disease |
| 11 | 118218491 | rs117745694  | A | G | NULL | 0.571996133 | NULL&M | Disease |
| 11 | 118542383 | rs687190     | C | T | NULL | 0.573219773 | NULL&M | Disease |
| 11 | 118831755 | rs10892316   | T | C | NULL | 0.573219773 | NULL&M | Disease |
| 11 | 119738420 | rs76598600   | T | C | NULL | 0.571996133 | NULL&M | Disease |
| 11 | 120580038 | rs12274300   | G | C | NULL | 0.573219773 | NULL&M | Disease |
| 11 | 117467560 | rs4938415    | A | C | NULL | 0.573219773 | NULL&M | Disease |
| 11 | 117727965 | rs11216587   | T | C | NULL | 0.573219773 | NULL&M | Disease |
| 11 | 118832582 | rs4938595    | T | G | NULL | 0.573219773 | NULL&M | Disease |
| 11 | 118834718 | rs112939258  | T | C | NULL | 0.573219773 | NULL&M | Disease |
| 11 | 116502706 | rs57228309   | T | A | NULL | 0.571996133 | NULL&M | Disease |
| 11 | 116684562 | rs2727791    | C | G | NULL | 0.573219773 | NULL&M | Disease |
| 11 | 116498120 | rs73578551   | T | C | NULL | 0.571996133 | NULL&M | Disease |
| 11 | 116501134 | rs73578554   | G | A | NULL | 0.571996133 | NULL&M | Disease |
| 11 | 117430971 | rs503281     | C | G | NULL | 0.573219773 | NULL&M | Disease |
| 11 | 117597518 | rs77346825   | A | G | NULL | 0.571996133 | NULL&M | Disease |
| 11 | 117910111 | rs653788     | T | C | NULL | 0.571996133 | NULL&M | Disease |
| 11 | 116771600 | rs71480323   | A | G | NULL | 0.573219773 | NULL&M | Disease |
| 11 | 117335517 | rs515871     | A | G | NULL | 0.573219773 | NULL&M | Disease |
| 11 | 118924212 | rs470324     | A | G | NULL | 0.573219773 | NULL&M | Disease |
| 11 | 119029849 | rs485030     | T | C | NULL | 0.573219773 | NULL&M | Disease |
| 11 | 117386925 | rs10892134   | T | C | NULL | 0.573219773 | NULL&M | Disease |
| 11 | 118873840 | rs9645663    | C | T | NULL | 0.574442517 | NULL&M | Disease |
| 11 | 119495043 | rs554282497  | C | G | NULL | 0.573219773 | NULL&M | Disease |
| 11 | 120208185 | rs4936515    | G | A | NULL | 0.573219773 | NULL&M | Disease |
| 11 | 116475538 | rs35401859   | G | T | NULL | 0.573219773 | NULL&M | Disease |
| 11 | 116489644 | rs73012959   | T | C | NULL | 0.573219773 | NULL&M | Disease |
| 11 | 116555207 | rs7932330    | G | A | NULL | 0.574442517 | NULL&M | Disease |
| 11 | 117085210 | rs77683187   | C | A | NULL | 0.573219773 | NULL&M | Disease |
| 11 | 118978319 | rs7936924    | C | T | NULL | 0.574442517 | NULL&M | Disease |
| 11 | 119950717 | rs117040938  | C | T | NULL | 0.573219773 | NULL&M | Disease |
| 11 | 121145466 | rs75215496   | C | T | NULL | 0.573219773 | NULL&M | Disease |
| 11 | 117309989 | rs11216386   | T | C | NULL | 0.574442517 | NULL&M | Disease |
| 11 | 117502726 | rs60668211   | A | G | NULL | 0.574442517 | NULL&M | Disease |
| 11 | 117632609 | rs10750113   | G | A | NULL | 0.574442517 | NULL&M | Disease |
| 11 | 117632645 | rs10790205   | C | T | NULL | 0.574442517 | NULL&M | Disease |
| 11 | 117731990 | rs61901488   | T | A | NULL | 0.574442517 | NULL&M | Disease |
| 11 | 119244095 | rs587985     | C | T | NULL | 0.574442517 | NULL&M | Disease |
| 11 | 119872269 | rs111748140  | T | C | NULL | 0.573219773 | NULL&M | Disease |
| 11 | 119943314 | rs145476010  | A | C | NULL | 0.573219773 | NULL&M | Disease |
| 11 | 119584347 | rs4533047    | T | C | NULL | 0.573219773 | NULL&M | Disease |
| 11 | 119584506 | rs4245205    | T | C | NULL | 0.573219773 | NULL&M | Disease |
| 11 | 119584876 | rs7927510    | A | T | NULL | 0.573219773 | NULL&M | Disease |
| 11 | 119586216 | rs7946962    | T | C | NULL | 0.573219773 | NULL&M | Disease |
| 11 | 116626735 | rs180322     | C | T | NULL | 0.574442517 | NULL&M | Disease |
| 11 | 119507035 | rs1546465    | G | T | NULL | 0.574442517 | NULL&M | Disease |
| 11 | 116473704 | rs12795589   | G | A | NULL | 0.574442517 | NULL&M | Disease |
| 11 | 120343650 | rs61898763   | T | C | NULL | 0.574442517 | NULL&M | Disease |
| 11 | 116480236 | rs148108200  | C | T | NULL | 0.573219773 | NULL&M | Disease |
| 11 | 119312818 | rs117259599  | T | C | NULL | 0.573219773 | NULL&M | Disease |
| 11 | 120912139 | rs73011555   | G | A | NULL | 0.573219773 | NULL&M | Disease |
| 11 | 116301501 | rs1045334530 | C | A | NULL | 0.574442517 | NULL&M | Disease |
| 11 | 117252135 | rs79879928   | A | G | NULL | 0.574442517 | NULL&M | Disease |
| 11 | 117714145 | rs12801338   | A | G | NULL | 0.574442517 | NULL&M | Disease |
| 11 | 116228118 | rs71478237   | C | A | NULL | 0.574442517 | NULL&M | Disease |
| 11 | 117045522 | rs79138835   | T | G | NULL | 0.574442517 | NULL&M | Disease |
| 11 | 117612254 | rs6589620    | A | T | NULL | 0.574442517 | NULL&M | Disease |
| 11 | 117632375 | rs4344529    | G | A | NULL | 0.574442517 | NULL&M | Disease |
| 11 | 118605447 | rs2186781    | T | C | NULL | 0.574442517 | NULL&M | Disease |
| 11 | 121139014 | rs80145448   | A | C | NULL | 0.574442517 | NULL&M | Disease |
| 11 | 117472044 | rs140763307  | G | A | NULL | 0.573219773 | NULL&M | Disease |
| 11 | 120601873 | rs2846106    | G | A | NULL | 0.574442517 | NULL&M | Disease |
| 11 | 117200974 | rs116006647  | T | C | NULL | 0.574442517 | NULL&M | Disease |
| 11 | 117646692 | rs11824545   | T | G | NULL | 0.574442517 | NULL&M | Disease |
| 11 | 118932320 | rs582688     | C | T | NULL | 0.575664351 | NULL&M | Disease |
| 11 | 117775903 | rs138450618  | T | C | NULL | 0.574442517 | NULL&M | Disease |
| 11 | 120557814 | rs17124208   | C | A | NULL | 0.574442517 | NULL&M | Disease |
| 11 | 116705568 | rs10750098   | G | T | NULL | 0.575664351 | NULL&M | Disease |
| 11 | 117632764 | rs10790206   | C | T | NULL | 0.575664351 | NULL&M | Disease |
| 11 | 117632769 | rs10790207   | C | T | NULL | 0.575664351 | NULL&M | Disease |
| 11 | 117671091 | rs7947524    | T | C | NULL | 0.575664351 | NULL&M | Disease |
| 11 | 118510642 | rs141169729  | T | C | NULL | 0.574442517 | NULL&M | Disease |
| 11 | 121142335 | rs116915994  | T | C | NULL | 0.574442517 | NULL&M | Disease |
| 11 | 116291707 | rs544154     | A | G | NULL | 0.575664351 | NULL&M | Disease |
| 11 | 116473789 | rs12796351   | A | G | NULL | 0.575664351 | NULL&M | Disease |
| 11 | 118062268 | rs639785     | T | C | NULL | 0.575664351 | NULL&M | Disease |
| 11 | 119466427 | rs73002932   | T | C | NULL | 0.575664351 | NULL&M | Disease |
| 11 | 121004502 | rs2155466    | T | C | NULL | 0.575664351 | NULL&M | Disease |
| 11 | 117074109 | rs12970      | A | G | NULL | 0.575664351 | NULL&M | Disease |
| 11 | 117361447 | rs10790190   | G | A | NULL | 0.575664351 | NULL&M | Disease |
| 11 | 119674742 | rs7113439    | T | C | NULL | 0.575664351 | NULL&M | Disease |
| 11 | 120893217 | rs191364497  | T | C | NULL | 0.574442517 | NULL&M | Disease |
| 11 | 117902428 | rs77245011   | C | A | NULL | 0.575664351 | NULL&M | Disease |
| 11 | 118977926 | rs6421572    | A | C | NULL | 0.575664351 | NULL&M | Disease |
| 11 | 116464465 | rs181124100  | T | C | NULL | 0.575664351 | NULL&M | Disease |
| 11 | 116676590 | rs4080140    | A | G | NULL | 0.575664351 | NULL&M | Disease |
| 11 | 117004112 | rs73008513   | G | A | NULL | 0.575664351 | NULL&M | Disease |

|    |           |             |   |   |       |           |           |        |            |
|----|-----------|-------------|---|---|-------|-----------|-----------|--------|------------|
| 11 | 116496416 | rs73578545  | C | T | 1.056 | -7977.388 | -7977.977 | -0.588 | 2.15E-06   |
| 11 | 117600518 | rs61903853  | G | T | 1.07  | -7977.388 | -7977.976 | -0.588 | 2.15E-06   |
| 11 | 121075781 | rs117986469 | A | C | 0.951 | -7977.388 | -7977.977 | -0.588 | 2.15E-06   |
| 11 | 118898319 | rs741811    | A | G | 1.061 | -7977.388 | -7977.978 | -0.589 | 2.15E-06   |
| 11 | 121064524 | rs11218199  | T | C | 1.051 | -7977.388 | -7977.977 | -0.589 | 2.15E-06   |
| 11 | 117070691 | rs526602    | A | G | 0.939 | -7977.388 | -7977.978 | -0.59  | 2.14E-06   |
| 11 | 117801857 | rs73024419  | T | C | 0.939 | -7977.388 | -7977.978 | -0.59  | 2.14E-06   |
| 11 | 117842743 | rs11216658  | C | G | 0.946 | -7977.388 | -7977.979 | -0.59  | 2.14E-06   |
| 11 | 119870442 | rs78914290  | T | C | 0.947 | -7977.388 | -7977.978 | -0.59  | 2.14E-06   |
| 11 | 116302939 | rs12226676  | G | T | 1.068 | -7977.388 | -7977.979 | -0.591 | 2.14E-06   |
| 11 | 118218491 | rs117745694 | A | G | 0.936 | -7977.388 | -7977.98  | -0.591 | 2.14E-06   |
| 11 | 118542383 | rs687190    | C | T | 0.954 | -7977.388 | -7977.979 | -0.591 | 2.14E-06   |
| 11 | 118831755 | rs10892316  | T | C | 1.058 | -7977.388 | -7977.98  | -0.592 | 2.14E-06   |
| 11 | 119738420 | rs76598600  | T | C | 0.94  | -7977.388 | -7977.98  | -0.592 | 2.14E-06   |
| 11 | 120580038 | rs12274300  | G | C | 0.945 | -7977.388 | -7977.981 | -0.592 | 2.14E-06   |
| 11 | 117467560 | rs4938415   | A | C | 1.05  | -7977.388 | -7977.982 | -0.593 | 2.14E-06   |
| 11 | 117727965 | rs11216587  | T | C | 1.069 | -7977.388 | -7977.982 | -0.593 | 2.14E-06   |
| 11 | 118832582 | rs4938595   | T | G | 1.056 | -7977.388 | -7977.982 | -0.593 | 2.14E-06   |
| 11 | 118834718 | rs112939258 | T | C | 1.058 | -7977.388 | -7977.981 | -0.593 | 2.14E-06   |
| 11 | 116502706 | rs57228309  | T | A | 1.055 | -7977.388 | -7977.982 | -0.594 | 2.14E-06   |
| 11 | 116684562 | rs2727791   | C | G | 1.049 | -7977.388 | -7977.983 | -0.594 | 2.14E-06   |
| 11 | 116498120 | rs73578551  | T | C | 1.054 | -7977.388 | -7977.983 | -0.595 | 2.13E-06   |
| 11 | 116501134 | rs73578554  | G | A | 1.054 | -7977.388 | -7977.984 | -0.595 | 2.13E-06   |
| 11 | 117430971 | rs503281    | C | G | 0.938 | -7977.388 | -7977.983 | -0.595 | 2.13E-06   |
| 11 | 117597518 | rs77346825  | A | G | 0.956 | -7977.388 | -7977.983 | -0.595 | 2.13E-06   |
| 11 | 117910111 | rs653788    | T | C | 1.057 | -7977.388 | -7977.983 | -0.595 | 2.13E-06   |
| 11 | 116771600 | rs71480323  | A | G | 1.062 | -7977.388 | -7977.984 | -0.596 | 2.13E-06   |
| 11 | 117335517 | rs515871    | A | G | 0.937 | -7977.388 | -7977.984 | -0.596 | 2.13E-06   |
| 11 | 118924212 | rs470324    | A | G | 1.059 | -7977.388 | -7977.984 | -0.596 | 2.13E-06   |
| 11 | 119029849 | rs485030    | T | C | 1.05  | -7977.388 | -7977.984 | -0.596 | 2.13E-06   |
| 11 | 117386925 | rs10892134  | T | C | 0.937 | -7977.388 | -7977.987 | -0.598 | 2.13E-06   |
| 11 | 118873840 | rs9645663   | C | T | 1.058 | -7977.388 | -7977.987 | -0.598 | 2.13E-06   |
| 11 | 119495043 | rs554282497 | C | G | 0.951 | -7977.388 | -7977.987 | -0.598 | 2.13E-06   |
| 11 | 120208185 | rs4936515   | G | A | 0.935 | -7977.388 | -7977.986 | -0.598 | 2.13E-06   |
| 11 | 116475538 | rs35401859  | G | T | 0.938 | -7977.388 | -7977.987 | -0.599 | 2.13E-06   |
| 11 | 116489644 | rs73012959  | T | C | 0.936 | -7977.388 | -7977.987 | -0.599 | 2.13E-06   |
| 11 | 116555207 | rs7932330   | G | A | 0.941 | -7977.388 | -7977.987 | -0.599 | 2.13E-06</ |

|    |           |             |   |   |      |             |        |         |
|----|-----------|-------------|---|---|------|-------------|--------|---------|
| 11 | 118862634 | rs59626457  | G | A | NULL | 0.575664351 | NULL&M | Disease |
| 11 | 116471898 | rs35664944  | A | G | NULL | 0.575664351 | NULL&M | Disease |
| 11 | 117902169 | rs586304    | T | A | NULL | 0.576885261 | NULL&M | Disease |
| 11 | 117961839 | rs651896    | T | C | NULL | 0.575664351 | NULL&M | Disease |
| 11 | 119398847 | rs4938670   | G | A | NULL | 0.576885261 | NULL&M | Disease |
| 11 | 120417553 | rs11217913  | G | A | NULL | 0.576885261 | NULL&M | Disease |
| 11 | 116468539 | rs75723689  | G | A | NULL | 0.575664351 | NULL&M | Disease |
| 11 | 116473730 | rs12796311  | T | G | NULL | 0.576885261 | NULL&M | Disease |
| 11 | 117070927 | rs2075548   | A | G | NULL | 0.575664351 | NULL&M | Disease |
| 11 | 120222480 | rs61898358  | A | G | NULL | 0.575664351 | NULL&M | Disease |
| 11 | 116530765 | rs555749    | T | C | NULL | 0.576885261 | NULL&M | Disease |
| 11 | 116673464 | rs61905132  | T | C | NULL | 0.575664351 | NULL&M | Disease |
| 11 | 116902639 | rs79357714  | G | A | NULL | 0.576885261 | NULL&M | Disease |
| 11 | 117347592 | rs114855326 | C | T | NULL | 0.575664351 | NULL&M | Disease |
| 11 | 117349617 | rs664657    | T | C | NULL | 0.576885261 | NULL&M | Disease |
| 11 | 118341212 | rs561775    | G | A | NULL | 0.576885261 | NULL&M | Disease |
| 11 | 117971968 | rs146877554 | A | G | NULL | 0.575664351 | NULL&M | Disease |
| 11 | 119690540 | rs117275185 | T | C | NULL | 0.575664351 | NULL&M | Disease |
| 11 | 118316006 | rs76651078  | A | G | NULL | 0.576885261 | NULL&M | Disease |
| 11 | 118831764 | rs61900158  | A | T | NULL | 0.576885261 | NULL&M | Disease |
| 11 | 118851138 | rs4456264   | T | C | NULL | 0.576885261 | NULL&M | Disease |
| 11 | 120579239 | rs61901380  | A | G | NULL | 0.576885261 | NULL&M | Disease |
| 11 | 119341720 | rs79294438  | T | C | NULL | 0.576885261 | NULL&M | Disease |
| 11 | 120327817 | rs17245518  | C | T | NULL | 0.576885261 | NULL&M | Disease |
| 11 | 116481066 | rs75137105  | T | C | NULL | 0.576885261 | NULL&M | Disease |
| 11 | 117672565 | rs10892174  | C | A | NULL | 0.576885261 | NULL&M | Disease |
| 11 | 117818210 | rs148882737 | T | C | NULL | 0.576885261 | NULL&M | Disease |
| 11 | 118823148 | rs663003    | C | T | NULL | 0.576885261 | NULL&M | Disease |
| 11 | 118864140 | rs11217116  | C | T | NULL | 0.576885261 | NULL&M | Disease |
| 11 | 119396373 | rs117507766 | T | C | NULL | 0.576885261 | NULL&M | Disease |
| 11 | 120921109 | rs11218125  | C | T | NULL | 0.576885261 | NULL&M | Disease |
| 11 | 118206121 | rs151127828 | A | G | NULL | 0.576885261 | NULL&M | Disease |
| 11 | 118859842 | rs12362865  | G | A | NULL | 0.576885261 | NULL&M | Disease |
| 11 | 119829348 | rs76499613  | C | T | NULL | 0.576885261 | NULL&M | Disease |
| 11 | 121058954 | rs492047    | A | G | NULL | 0.576885261 | NULL&M | Disease |
| 11 | 116559663 | rs11828763  | G | A | NULL | 0.576885261 | NULL&M | Disease |
| 11 | 116843425 | rs11216206  | G | C | NULL | 0.576885261 | NULL&M | Disease |
| 11 | 117635223 | rs7936362   | A | C | NULL | 0.576885261 | NULL&M | Disease |
| 11 | 116429563 | rs17119815  | G | T | NULL | 0.578105233 | NULL&M | Disease |
| 11 | 117313626 | rs118069464 | C | G | NULL | 0.576885261 | NULL&M | Disease |
| 11 | 117594364 | rs4938435   | G | A | NULL | 0.576885261 | NULL&M | Disease |
| 11 | 118856920 | rs11217112  | G | A | NULL | 0.578105233 | NULL&M | Disease |
| 11 | 118861389 | rs4936455   | T | C | NULL | 0.578105233 | NULL&M | Disease |
| 11 | 118862306 | rs9794909   | C | G | NULL | 0.578105233 | NULL&M | Disease |
| 11 | 119679280 | rs61897706  | A | G | NULL | 0.576885261 | NULL&M | Disease |
| 11 | 119691272 | rs34708128  | T | C | NULL | 0.576885261 | NULL&M | Disease |
| 11 | 118856816 | rs59316586  | C | A | NULL | 0.578105233 | NULL&M | Disease |
| 11 | 119828457 | rs72994637  | A | G | NULL | 0.576885261 | NULL&M | Disease |
| 11 | 118187216 | rs73014296  | G | A | NULL | 0.576885261 | NULL&M | Disease |
| 11 | 119577324 | rs7104562   | G | A | NULL | 0.576885261 | NULL&M | Disease |
| 11 | 119823216 | rs56303695  | A | G | NULL | 0.576885261 | NULL&M | Disease |
| 11 | 120239610 | rs12786734  | G | A | NULL | 0.576885261 | NULL&M | Disease |
| 11 | 120579826 | rs11217987  | A | T | NULL | 0.578105233 | NULL&M | Disease |
| 11 | 116592365 | rs180370    | T | C | NULL | 0.578105233 | NULL&M | Disease |
| 11 | 118855221 | rs11825496  | G | T | NULL | 0.578105233 | NULL&M | Disease |
| 11 | 118859274 | rs4936454   | T | C | NULL | 0.578105233 | NULL&M | Disease |
| 11 | 119499578 | rs76365645  | A | G | NULL | 0.578105233 | NULL&M | Disease |
| 11 | 117883397 | rs78204624  | C | G | NULL | 0.578105233 | NULL&M | Disease |
| 11 | 118852526 | rs45527340  | G | C | NULL | 0.578105233 | NULL&M | Disease |
| 11 | 119975137 | rs117420503 | T | C | NULL | 0.576885261 | NULL&M | Disease |
| 11 | 120857142 | rs145034678 | A | G | NULL | 0.576885261 | NULL&M | Disease |
| 11 | 117706667 | rs10790213  | T | A | NULL | 0.578105233 | NULL&M | Disease |
| 11 | 117186506 | rs28917234  | A | G | NULL | 0.578105233 | NULL&M | Disease |
| 11 | 120581323 | rs61901382  | A | G | NULL | 0.578105233 | NULL&M | Disease |
| 11 | 120581609 | rs7944756   | A | T | NULL | 0.578105233 | NULL&M | Disease |
| 11 | 120658874 | rs4359220   | G | A | NULL | 0.578105233 | NULL&M | Disease |
| 11 | 120944219 | rs11218135  | G | A | NULL | 0.578105233 | NULL&M | Disease |
| 11 | 120946892 | rs58204590  | G | A | NULL | 0.578105233 | NULL&M | Disease |
| 11 | 117255837 | rs117498846 | A | G | NULL | 0.578105233 | NULL&M | Disease |
| 11 | 119692871 | rs11217524  | C | T | NULL | 0.578105233 | NULL&M | Disease |
| 11 | 119893391 | rs624176    | T | C | NULL | 0.578105233 | NULL&M | Disease |
| 11 | 121082988 | rs520868    | C | T | NULL | 0.578105233 | NULL&M | Disease |
| 11 | 116424909 | rs61904800  | A | G | NULL | 0.578105233 | NULL&M | Disease |
| 11 | 116536656 | rs10892010  | C | A | NULL | 0.578105233 | NULL&M | Disease |
| 11 | 116471121 | rs12274273  | C | T | NULL | 0.578105233 | NULL&M | Disease |
| 11 | 116471149 | rs12280450  | G | A | NULL | 0.578105233 | NULL&M | Disease |
| 11 | 117727549 | rs11216584  | G | A | NULL | 0.578105233 | NULL&M | Disease |
| 11 | 117830715 | rs116864232 | C | T | NULL | 0.578105233 | NULL&M | Disease |
| 11 | 120824323 | rs520332    | T | G | NULL | 0.579324252 | NULL&M | Disease |
| 11 | 116232577 | rs11605788  | A | C | NULL | 0.578105233 | NULL&M | Disease |
| 11 | 118889822 | rs3802882   | G | C | NULL | 0.579324252 | NULL&M | Disease |
| 11 | 120705673 | rs11601867  | A | G | NULL | 0.579324252 | NULL&M | Disease |
| 11 | 120577423 | rs4567478   | C | T | NULL | 0.579324252 | NULL&M | Disease |
| 11 | 120864806 | rs10892657  | C | A | NULL | 0.579324252 | NULL&M | Disease |
| 11 | 117448013 | rs12799825  | A | C | NULL | 0.579324252 | NULL&M | Disease |
| 11 | 117572969 | rs74660871  | C | T | NULL | 0.578105233 | NULL&M | Disease |
| 11 | 117610387 | rs10790203  | G | A | NULL | 0.578105233 | NULL&M | Disease |
| 11 | 117611495 | rs4936405   | G | A | NULL | 0.578105233 | NULL&M | Disease |
| 11 | 118622245 | rs485901    | G | A | NULL | 0.579324252 | NULL&M | Disease |
| 11 | 118689745 | rs492471    | T | C | NULL | 0.579324252 | NULL&M | Disease |
| 11 | 119915024 | rs1942011   | T | C | NULL | 0.579324252 | NULL&M | Disease |
| 11 | 117297406 | rs78795346  | A | G | NULL | 0.578105233 | NULL&M | Disease |
| 11 | 117339203 | rs142239919 | G | A | NULL | 0.578105233 | NULL&M | Disease |
| 11 | 117554617 | rs116904534 | G | A | NULL | 0.579324252 | NULL&M | Disease |
| 11 | 117593368 | rs11599950  | T | C | NULL | 0.579324252 | NULL&M | Disease |
| 11 | 116631542 | rs35004487  | C | G | NULL | 0.578105233 | NULL&M | Disease |

|    |           |             |   |   |       |           |           |        |          |
|----|-----------|-------------|---|---|-------|-----------|-----------|--------|----------|
| 11 | 118862634 | rs59626457  | G | A | 1.048 | -7977.388 | -7978.005 | -0.617 | 2.09E-06 |
| 11 | 116471898 | rs35664944  | A | G | 0.938 | -7977.388 | -7978.008 | -0.619 | 2.08E-06 |
| 11 | 117902169 | rs586304    | T | A | 1.048 | -7977.388 | -7978.007 | -0.619 | 2.08E-06 |
| 11 | 117961839 | rs651896    | T | C | 1.066 | -7977.388 | -7978.008 | -0.619 | 2.08E-06 |
| 11 | 119398847 | rs4938670   | G | A | 1.05  | -7977.388 | -7978.008 | -0.619 | 2.08E-06 |
| 11 | 120417553 | rs11217913  | G | A | 0.951 | -7977.388 | -7978.007 | -0.619 | 2.08E-06 |
| 11 | 116468539 | rs75723689  | A | G | 0.938 | -7977.388 | -7978.008 | -0.62  | 2.08E-06 |
| 11 | 116473730 | rs12796311  | T | G | 0.938 | -7977.388 | -7978.009 | -0.62  | 2.08E-06 |
| 11 | 117070927 | rs2075548   | A | G | 0.954 | -7977.388 | -7978.008 | -0.62  | 2.08E-06 |
| 11 | 120222480 | rs61898358  | A | G | 1.064 | -7977.388 | -7978.008 | -0.62  | 2.08E-06 |
| 11 | 116530765 | rs555749    | T | C | 1.048 | -7977.388 | -7978.01  | -0.621 | 2.08E-06 |
| 11 | 116673464 | rs61905132  | T | C | 0.94  | -7977.388 | -7978.009 | -0.621 | 2.08E-06 |
| 11 | 116902639 | rs79357714  | G | A | 0.936 | -7977.388 | -7978.01  | -0.621 | 2.08E-06 |
| 11 | 117347592 | rs114855326 | C | T | 1.043 | -7977.388 | -7978.009 | -0.621 | 2.08E-06 |
| 11 | 117349617 | rs664657    | T | C | 0.938 | -7977.388 | -7978.009 | -0.621 | 2.08E-06 |
| 11 | 118341212 | rs561775    | G | A | 0.942 | -7977.388 | -7978.011 | -0.622 | 2.08E-06 |
| 11 | 117971968 | rs146877554 | A | G | 0.944 | -7977.388 | -7978.011 | -0.623 | 2.07E-06 |
| 11 | 119690540 | rs117275185 | T | C | 1.017 | -7977.388 | -7978.012 | -0.623 | 2.07E-06 |
| 11 | 118316006 | rs76651078  | A | G | 1.067 | -7977.388 | -7978.012 | -0.624 | 2.07E-06 |
| 11 | 118831764 | rs61900158  | A | T | 1.055 | -7977.388 | -7978.013 | -0.624 | 2.07E-06 |
| 11 | 118851138 | rs4456264   | T | C | 1.048 | -7977.388 | -7978.013 | -0.624 | 2.07E-06 |
| 11 | 120579239 | rs61901380  | A | G | 0.946 | -7977.388 | -7978.012 | -0.624 | 2.07E-06 |
| 11 | 119341720 | rs79294438  | T | C | 0.94  | -7977.388 | -7978.013 | -0.625 | 2.07E-06 |
| 11 | 120327817 | rs17245518  | C | T | 1.063 | -7977.388 | -7978.013 | -0.625 | 2.07E-06 |
| 11 | 116481066 | rs75137105  | T | C | 1.049 | -7977.388 | -7978.014 | -0.626 | 2.07E-06 |
| 11 | 117672565 | rs10892174  | C | A | 0.952 | -7977.388 | -7978.014 | -0.626 | 2.07E-06 |
| 11 | 117818210 | rs148882737 | T | C | 0.951 | -7977.388 | -7978.014 | -0.626 | 2.07E-06 |
| 11 | 118823148 | rs663003    | C | T | 0.954 | -7977.388 | -7978.014 | -0.626 | 2.07E-06 |
| 11 | 118864140 | rs11217116  | C | T | 1.048 | -7977.388 | -7978.015 | -0.626 | 2.07E-06 |
| 11 | 119396373 | rs117507766 | T | C | 0.94  | -7977.388 | -7978.014 | -0.626 | 2.07E-06 |
| 11 | 120921109 | rs11218125  | C | T | 1.054 | -7977.388 | -7978.015 | -0.626 | 2.07E-06 |
| 11 | 118206121 | rs151127828 | A | G | 0.943 | -7977.388 | -7978.016 | -0.627 | 2.07E-06 |
| 11 | 118859842 | rs12362865  | G | A | 1.048 | -7977.388 | -7978.015 | -0.627 | 2.07E-06 |
| 11 | 119829348 | rs76499613  | C | T | 1.052 | -7977.388 | -7978.015 | -0.627 | 2.07E-06 |
| 11 | 121058954 | rs492047    | A | G | 0.953 | -7977.388 | -7978.015 | -0.627 | 2.07E-06 |
| 11 | 116559663 | rs11828763  | G | A | 0.941 | -7977.388 | -7978.016 | -0.628 | 2.06E-06 |
| 11 | 116843425 | rs11216206  | G | C | 1.065 | -7977.388 | -7978.016 | -0.628 |          |

|    |           |              |   |   |      |             |        |         |
|----|-----------|--------------|---|---|------|-------------|--------|---------|
| 11 | 117646768 | rs7119967    | A | G | NULL | 0.579324252 | NULL&M | Disease |
| 11 | 117848632 | rs11216663   | T | G | NULL | 0.579324252 | NULL&M | Disease |
| 11 | 118921306 | rs519942     | A | G | NULL | 0.579324252 | NULL&M | Disease |
| 11 | 117615894 | rs146781782  | A | G | NULL | 0.578105233 | NULL&M | Disease |
| 11 | 119445010 | rs61898747   | G | T | NULL | 0.578105233 | NULL&M | Disease |
| 11 | 120578917 | rs7946325    | G | A | NULL | 0.579324252 | NULL&M | Disease |
| 11 | 117398435 | rs77026903   | T | C | NULL | 0.579324252 | NULL&M | Disease |
| 11 | 118335927 | rs495132     | A | G | NULL | 0.579324252 | NULL&M | Disease |
| 11 | 119773797 | rs117913812  | C | T | NULL | 0.579324252 | NULL&M | Disease |
| 11 | 116550776 | rs12417015   | G | A | NULL | 0.579324252 | NULL&M | Disease |
| 11 | 117414385 | rs650535     | T | C | NULL | 0.580542305 | NULL&M | Disease |
| 11 | 117919431 | rs1338985819 | A | G | NULL | 0.580542305 | NULL&M | Disease |
| 11 | 118747576 | rs55756957   | G | A | NULL | 0.580542305 | NULL&M | Disease |
| 11 | 118824439 | rs61900157   | A | C | NULL | 0.580542305 | NULL&M | Disease |
| 11 | 118920112 | rs670192     | A | G | NULL | 0.580542305 | NULL&M | Disease |
| 11 | 119302513 | rs77564141   | G | A | NULL | 0.579324252 | NULL&M | Disease |
| 11 | 119927038 | rs684233     | A | G | NULL | 0.580542305 | NULL&M | Disease |
| 11 | 120474370 | rs7131215    | G | C | NULL | 0.580542305 | NULL&M | Disease |
| 11 | 116439602 | rs7943240    | C | T | NULL | 0.580542305 | NULL&M | Disease |
| 11 | 118876213 | rs76253444   | G | A | NULL | 0.580542305 | NULL&M | Disease |
| 11 | 118889813 | rs3802883    | G | C | NULL | 0.579324252 | NULL&M | Disease |
| 11 | 119957452 | rs191917960  | G | C | NULL | 0.579324252 | NULL&M | Disease |
| 11 | 120577940 | rs61901379   | A | G | NULL | 0.580542305 | NULL&M | Disease |
| 11 | 117340285 | rs554912     | T | C | NULL | 0.580542305 | NULL&M | Disease |
| 11 | 118619423 | rs1961138    | C | T | NULL | 0.580542305 | NULL&M | Disease |
| 11 | 119498563 | rs11217360   | T | C | NULL | 0.580542305 | NULL&M | Disease |
| 11 | 117342672 | rs34573317   | C | T | NULL | 0.579324252 | NULL&M | Disease |
| 11 | 117667688 | rs113876980  | A | C | NULL | 0.580542305 | NULL&M | Disease |
| 11 | 119479675 | rs181268545  | A | G | NULL | 0.579324252 | NULL&M | Disease |
| 11 | 119593452 | rs11600071   | G | A | NULL | 0.579324252 | NULL&M | Disease |
| 11 | 117315326 | rs150311062  | A | G | NULL | 0.579324252 | NULL&M | Disease |
| 11 | 116238815 | rs519390     | C | T | NULL | 0.580542305 | NULL&M | Disease |
| 11 | 116547972 | rs117730773  | T | C | NULL | 0.579324252 | NULL&M | Disease |
| 11 | 116619605 | rs34637368   | A | G | NULL | 0.580542305 | NULL&M | Disease |
| 11 | 119629249 | rs11217470   | C | T | NULL | 0.580542305 | NULL&M | Disease |
| 11 | 121057021 | rs601102     | C | T | NULL | 0.580542305 | NULL&M | Disease |
| 11 | 121184472 | rs75133657   | C | A | NULL | 0.579324252 | NULL&M | Disease |
| 11 | 117292550 | rs7120516    | C | G | NULL | 0.579324252 | NULL&M | Disease |
| 11 | 117376413 | rs34138305   | A | G | NULL | 0.580542305 | NULL&M | Disease |
| 11 | 116628396 | rs143811287  | T | C | NULL | 0.580542305 | NULL&M | Disease |
| 11 | 117347029 | rs77346757   | A | G | NULL | 0.580542305 | NULL&M | Disease |
| 11 | 117347073 | rs115894834  | G | A | NULL | 0.580542305 | NULL&M | Disease |
| 11 | 117962813 | rs948467     | G | A | NULL | 0.580542305 | NULL&M | Disease |
| 11 | 120897776 | rs12797625   | A | G | NULL | 0.580542305 | NULL&M | Disease |
| 11 | 116703640 | rs5128       | G | C | NULL | 0.580542305 | NULL&M | Disease |
| 11 | 120277110 | rs117598476  | C | T | NULL | 0.580542305 | NULL&M | Disease |
| 11 | 116366118 | rs58856586   | A | G | NULL | 0.581759377 | NULL&M | Disease |
| 11 | 118618837 | rs640120     | A | C | NULL | 0.581759377 | NULL&M | Disease |
| 11 | 120568254 | rs12276408   | G | A | NULL | 0.581759377 | NULL&M | Disease |
| 11 | 116322222 | rs118168570  | A | G | NULL | 0.580542305 | NULL&M | Disease |
| 11 | 116640062 | rs622604     | C | T | NULL | 0.581759377 | NULL&M | Disease |
| 11 | 116640094 | rs610675     | A | T | NULL | 0.581759377 | NULL&M | Disease |
| 11 | 116640368 | rs623908     | G | A | NULL | 0.581759377 | NULL&M | Disease |
| 11 | 117795742 | rs78053944   | T | C | NULL | 0.580542305 | NULL&M | Disease |
| 11 | 118615660 | rs6589687    | T | A | NULL | 0.581759377 | NULL&M | Disease |
| 11 | 119371772 | rs78033613   | A | G | NULL | 0.580542305 | NULL&M | Disease |
| 11 | 119636942 | rs7130866    | G | A | NULL | 0.581759377 | NULL&M | Disease |
| 11 | 120580572 | rs28781001   | G | A | NULL | 0.581759377 | NULL&M | Disease |
| 11 | 121055740 | rs481703     | C | T | NULL | 0.581759377 | NULL&M | Disease |
| 11 | 116951533 | rs10892070   | A | G | NULL | 0.581759377 | NULL&M | Disease |
| 11 | 117646682 | rs11824502   | G | C | NULL | 0.581759377 | NULL&M | Disease |
| 11 | 119397680 | rs7395947    | C | T | NULL | 0.581759377 | NULL&M | Disease |
| 11 | 116665661 | rs1729410    | C | G | NULL | 0.581759377 | NULL&M | Disease |
| 11 | 117693413 | rs35705701   | A | G | NULL | 0.580542305 | NULL&M | Disease |
| 11 | 118064030 | rs45555132   | T | G | NULL | 0.580542305 | NULL&M | Disease |
| 11 | 120034758 | rs189431300  | A | G | NULL | 0.580542305 | NULL&M | Disease |
| 11 | 121068352 | rs190638475  | A | G | NULL | 0.580542305 | NULL&M | Disease |
| 11 | 117952091 | rs45445895   | A | G | NULL | 0.580542305 | NULL&M | Disease |
| 11 | 117973145 | rs73012879   | A | G | NULL | 0.581759377 | NULL&M | Disease |
| 11 | 120838141 | rs41297897   | A | G | NULL | 0.580542305 | NULL&M | Disease |
| 11 | 120898097 | rs117476293  | C | A | NULL | 0.581759377 | NULL&M | Disease |
| 11 | 116304790 | rs115696360  | C | G | NULL | 0.581759377 | NULL&M | Disease |
| 11 | 116542247 | rs36195057   | A | G | NULL | 0.581759377 | NULL&M | Disease |
| 11 | 117400284 | rs78615799   | T | C | NULL | 0.580542305 | NULL&M | Disease |
| 11 | 117403017 | rs7109567    | G | A | NULL | 0.581759377 | NULL&M | Disease |
| 11 | 117674355 | rs10892175   | A | G | NULL | 0.581759377 | NULL&M | Disease |
| 11 | 118825636 | rs1790191    | A | G | NULL | 0.581759377 | NULL&M | Disease |
| 11 | 117074229 | rs641620     | C | T | NULL | 0.581759377 | NULL&M | Disease |
| 11 | 117322099 | rs76257648   | A | C | NULL | 0.580542305 | NULL&M | Disease |
| 11 | 120790963 | rs10892643   | T | C | NULL | 0.581759377 | NULL&M | Disease |
| 11 | 116791391 | rs79489590   | T | C | NULL | 0.581759377 | NULL&M | Disease |
| 11 | 117316640 | rs117195665  | T | G | NULL | 0.580542305 | NULL&M | Disease |
| 11 | 120867999 | rs78995144   | A | G | NULL | 0.581759377 | NULL&M | Disease |
| 11 | 121013174 | rs2155365    | C | A | NULL | 0.581759377 | NULL&M | Disease |
| 11 | 117324964 | rs10750106   | T | C | NULL | 0.581759377 | NULL&M | Disease |
| 11 | 117337032 | rs150081993  | T | C | NULL | 0.580542305 | NULL&M | Disease |
| 11 | 116557142 | rs2156121    | A | C | NULL | 0.582975454 | NULL&M | Disease |
| 11 | 117248283 | rs117619191  | C | T | NULL | 0.581759377 | NULL&M | Disease |
| 11 | 117953132 | rs113137102  | A | C | NULL | 0.581759377 | NULL&M | Disease |
| 11 | 118609736 | rs1783937    | A | G | NULL | 0.582975454 | NULL&M | Disease |
| 11 | 119539313 | rs4938704    | T | C | NULL | 0.582975454 | NULL&M | Disease |
| 11 | 116351099 | rs17490647   | C | A | NULL | 0.581759377 | NULL&M | Disease |
| 11 | 116460172 | rs11216023   | C | G | NULL | 0.581759377 | NULL&M | Disease |
| 11 | 116631391 | rs3741301    | C | T | NULL | 0.582975454 | NULL&M | Disease |
| 11 | 117221170 | rs563828     | T | G | NULL | 0.582975454 | NULL&M | Disease |
| 11 | 117237186 | rs7106772    | A | G | NULL | 0.581759377 | NULL&M | Disease |

|    |           |              |   |   |       |           |           |        |          |
|----|-----------|--------------|---|---|-------|-----------|-----------|--------|----------|
| 11 | 117646768 | rs7119967    | A | G | 1.063 | -7977.388 | -7978.032 | -0.644 | 2.03E-06 |
| 11 | 117848632 | rs11216663   | T | G | 0.938 | -7977.388 | -7978.032 | -0.644 | 2.03E-06 |
| 11 | 118921306 | rs519942     | A | G | 1.057 | -7977.388 | -7978.033 | -0.644 | 2.03E-06 |
| 11 | 117615894 | rs146781782  | A | G | 0.973 | -7977.388 | -7978.033 | -0.645 | 2.03E-06 |
| 11 | 119445010 | rs61898747   | G | T | 0.965 | -7977.388 | -7978.033 | -0.645 | 2.03E-06 |
| 11 | 120578917 | rs7946325    | G | A | 0.946 | -7977.388 | -7978.033 | -0.645 | 2.03E-06 |
| 11 | 117398435 | rs77026903   | T | C | 0.948 | -7977.388 | -7978.035 | -0.647 | 2.03E-06 |
| 11 | 118335927 | rs495132     | A | G | 0.943 | -7977.388 | -7978.035 | -0.647 | 2.03E-06 |
| 11 | 119773797 | rs117913812  | C | T | 0.947 | -7977.388 | -7978.035 | -0.647 | 2.03E-06 |
| 11 | 116550776 | rs12417015   | G | A | 0.947 | -7977.388 | -7978.036 | -0.648 | 2.02E-06 |
| 11 | 117414385 | rs650535     | T | C | 1.051 | -7977.388 | -7978.036 | -0.648 | 2.02E-06 |
| 11 | 117919431 | rs1338985819 | A | G | 0.955 | -7977.388 | -7978.037 | -0.648 | 2.02E-06 |
| 11 | 118747576 | rs55756957   | G | A | 0.951 | -7977.388 | -7978.037 | -0.648 | 2.02E-06 |
| 11 | 118824439 | rs61900157   | A | C | 0.955 | -7977.388 | -7978.037 | -0.648 | 2.02E-06 |
| 11 | 118920112 | rs670192     | A | G | 1.057 | -7977.388 | -7978.037 | -0.648 | 2.02E-06 |
| 11 | 119302513 | rs77564141   | G | A | 0.955 | -7977.388 | -7978.037 | -0.648 | 2.02E-06 |
| 11 | 119927038 | rs684233     | A | G | 0.949 | -7977.388 | -7978.037 | -0.648 | 2.02E-06 |
| 11 | 120474370 | rs7131215    | G | C | 1.049 | -7977.388 | -7978.036 | -0.648 | 2.02E-06 |
| 11 | 116439602 | rs7943240    | C | T | 1.049 | -7977.388 | -7978.037 | -0.649 | 2.02E-06 |
| 11 | 118876213 | rs76253444   | G | A | 1.056 | -7977.388 | -7978.037 | -0.649 | 2.02E-06 |
| 11 | 118889813 | rs3802883    | G | C | 0.941 | -7977.388 | -7978.037 | -0.649 | 2.02E-06 |
| 11 | 119957452 | rs191917960  | G | C | 0.938 | -7977.388 | -7978.037 | -0.649 | 2.02E-06 |
| 11 | 120577940 | rs61901379   | A | G | 0.946 | -7977.388 | -7978.037 | -0.649 | 2.02E-06 |
| 11 | 117340285 | rs554912     | T | C | 0.947 | -7977.388 | -7978.038 | -0.65  | 2.02E-06 |
| 11 | 118619423 | rs1961138    | C | T | 0.944 | -7977.388 | -7978.039 | -0.65  | 2.02E-06 |
| 11 | 119498563 | rs11217360   | T | C | 1.058 | -7977.388 | -7978.039 | -0.651 | 2.02E-06 |
| 11 | 117342672 | rs34573317   | C | T | 0.94  | -7977.388 | -7978.04  | -0.652 | 2.02E-06 |
| 11 | 117667688 | rs113876980  | A | C | 0.953 | -7977.388 | -7978.04  | -0.652 | 2.02E-06 |
| 11 | 119479675 | rs181268545  | A | G | 0.948 | -7977.388 | -7978.04  | -0.652 | 2.02E-06 |
| 11 | 119593452 | rs11600071   | G | A | 0.945 | -7977.388 | -7978.04  | -0.652 | 2.02E-06 |
| 11 | 117315326 | rs150311062  | A | G | 0.979 | -7977.388 | -7978.042 | -0.653 | 2.01E-06 |
| 11 | 116238815 | rs519390     | C | T | 1.047 | -7977.388 | -7978.042 | -0.654 | 2.01E-06 |
| 11 | 116547972 | rs117730773  | T | C | 1.006 | -7977.388 | -7978.042 | -0.654 | 2.01E-06 |
| 11 | 116619605 | rs34637368   | A | G | 1.059 | -7977.388 | -7978.042 | -0.654 | 2.01E-06 |
| 11 | 119629249 | rs11217470   | C | T | 0.943 | -7977.388 | -7978.043 | -0.654 | 2.01E-06 |
| 11 | 121057021 | rs601102     | C | T | 0.953 | -7977.388 | -7978.042 | -0.654 | 2.01E-06 |
| 11 | 121184472 | rs75133657   | C | A | 0.947 | -7977.388 | -7978.042 | -0.654 | 2.       |

|    |           |              |   |   |      |             |        |         |
|----|-----------|--------------|---|---|------|-------------|--------|---------|
| 11 | 117244291 | rs76344095   | T | C | NULL | 0.581759377 | NULL&M | Disease |
| 11 | 117244606 | rs7109766    | T | A | NULL | 0.581759377 | NULL&M | Disease |
| 11 | 117253230 | rs78406883   | T | C | NULL | 0.581759377 | NULL&M | Disease |
| 11 | 117335686 | rs61743159   | A | G | NULL | 0.581759377 | NULL&M | Disease |
| 11 | 118852137 | rs4936451    | T | C | NULL | 0.582975454 | NULL&M | Disease |
| 11 | 116309713 | rs73580459   | A | G | NULL | 0.581759377 | NULL&M | Disease |
| 11 | 120124302 | rs59565018   | A | G | NULL | 0.581759377 | NULL&M | Disease |
| 11 | 120779520 | rs949055     | C | T | NULL | 0.582975454 | NULL&M | Disease |
| 11 | 117908328 | rs3016863    | A | G | NULL | 0.582975454 | NULL&M | Disease |
| 11 | 120580623 | rs7102869    | T | C | NULL | 0.582975454 | NULL&M | Disease |
| 11 | 117200943 | rs1242695    | T | G | NULL | 0.582975454 | NULL&M | Disease |
| 11 | 117336093 | rs117028190  | T | C | NULL | 0.581759377 | NULL&M | Disease |
| 11 | 118919206 | rs568922     | T | C | NULL | 0.582975454 | NULL&M | Disease |
| 11 | 119246708 | rs675873     | C | T | NULL | 0.582975454 | NULL&M | Disease |
| 11 | 119604844 | rs11607679   | A | C | NULL | 0.581759377 | NULL&M | Disease |
| 11 | 120576351 | rs12281464   | T | A | NULL | 0.582975454 | NULL&M | Disease |
| 11 | 120576489 | rs12294858   | A | G | NULL | 0.582975454 | NULL&M | Disease |
| 11 | 120999258 | rs4936578    | G | A | NULL | 0.582975454 | NULL&M | Disease |
| 11 | 116236775 | rs526151     | T | C | NULL | 0.582975454 | NULL&M | Disease |
| 11 | 117530935 | rs7949670    | A | C | NULL | 0.582975454 | NULL&M | Disease |
| 11 | 117773027 | rs117010140  | A | G | NULL | 0.581759377 | NULL&M | Disease |
| 11 | 118852641 | rs12273687   | T | G | NULL | 0.582975454 | NULL&M | Disease |
| 11 | 119875786 | rs1944499    | A | G | NULL | 0.582975454 | NULL&M | Disease |
| 11 | 120603160 | rs79540430   | T | A | NULL | 0.582975454 | NULL&M | Disease |
| 11 | 120649337 | rs117414016  | T | G | NULL | 0.582975454 | NULL&M | Disease |
| 11 | 117330944 | rs75813208   | T | C | NULL | 0.582975454 | NULL&M | Disease |
| 11 | 117638305 | rs61903859   | A | C | NULL | 0.582975454 | NULL&M | Disease |
| 11 | 119944195 | rs661621     | T | A | NULL | 0.582975454 | NULL&M | Disease |
| 11 | 120992119 | rs11218148   | A | C | NULL | 0.582975454 | NULL&M | Disease |
| 11 | 120992859 | rs4936576    | C | G | NULL | 0.582975454 | NULL&M | Disease |
| 11 | 116591934 | rs180372     | A | G | NULL | 0.582975454 | NULL&M | Disease |
| 11 | 117326419 | rs118100246  | A | G | NULL | 0.581759377 | NULL&M | Disease |
| 11 | 117328052 | rs148406383  | T | C | NULL | 0.581759377 | NULL&M | Disease |
| 11 | 117965421 | rs45499491   | T | C | NULL | 0.582975454 | NULL&M | Disease |
| 11 | 118889810 | rs3802884    | T | C | NULL | 0.582975454 | NULL&M | Disease |
| 11 | 121108907 | rs1941299    | C | A | NULL | 0.582975454 | NULL&M | Disease |
| 11 | 116466714 | rs12292959   | C | T | NULL | 0.582975454 | NULL&M | Disease |
| 11 | 117330326 | rs145305155  | G | A | NULL | 0.582975454 | NULL&M | Disease |
| 11 | 117646805 | rs11819854   | T | A | NULL | 0.582975454 | NULL&M | Disease |
| 11 | 121103704 | rs10892692   | G | A | NULL | 0.582975454 | NULL&M | Disease |
| 11 | 117392940 | rs7941258    | T | C | NULL | 0.582975454 | NULL&M | Disease |
| 11 | 117392987 | rs7941460    | A | G | NULL | 0.582975454 | NULL&M | Disease |
| 11 | 117393345 | rs7944704    | A | G | NULL | 0.582975454 | NULL&M | Disease |
| 11 | 118853774 | rs11217109   | C | T | NULL | 0.584190523 | NULL&M | Disease |
| 11 | 119466907 | rs150628867  | A | G | NULL | 0.582975454 | NULL&M | Disease |
| 11 | 119684904 | rs79297443   | T | C | NULL | 0.582975454 | NULL&M | Disease |
| 11 | 119889758 | rs1170855838 | T | C | NULL | 0.584190523 | NULL&M | Disease |
| 11 | 117821885 | rs144891162  | T | C | NULL | 0.582975454 | NULL&M | Disease |
| 11 | 117906759 | rs649827     | T | C | NULL | 0.584190523 | NULL&M | Disease |
| 11 | 118314849 | rs2017122    | T | C | NULL | 0.584190523 | NULL&M | Disease |
| 11 | 120576154 | rs11217984   | T | C | NULL | 0.584190523 | NULL&M | Disease |
| 11 | 116737302 | rs139447106  | T | C | NULL | 0.584190523 | NULL&M | Disease |
| 11 | 117094591 | rs17120523   | G | A | NULL | 0.584190523 | NULL&M | Disease |
| 11 | 120860524 | rs34259384   | T | G | NULL | 0.584190523 | NULL&M | Disease |
| 11 | 116353269 | rs118065597  | A | G | NULL | 0.582975454 | NULL&M | Disease |
| 11 | 116741840 | rs73023041   | A | G | NULL | 0.584190523 | NULL&M | Disease |
| 11 | 117630622 | rs78080546   | T | A | NULL | 0.584190523 | NULL&M | Disease |
| 11 | 119609828 | rs113950321  | C | A | NULL | 0.582975454 | NULL&M | Disease |
| 11 | 120009748 | rs61900472   | A | G | NULL | 0.584190523 | NULL&M | Disease |
| 11 | 120623637 | rs11217999   | A | C | NULL | 0.584190523 | NULL&M | Disease |
| 11 | 120871324 | rs11218103   | T | C | NULL | 0.584190523 | NULL&M | Disease |
| 11 | 116677370 | rs1729407    | C | G | NULL | 0.584190523 | NULL&M | Disease |
| 11 | 121004851 | rs7125224    | A | G | NULL | 0.584190523 | NULL&M | Disease |
| 11 | 121160481 | rs10750184   | A | G | NULL | 0.584190523 | NULL&M | Disease |
| 11 | 118509877 | rs112552940  | T | C | NULL | 0.584190523 | NULL&M | Disease |
| 11 | 118824996 | rs4426142    | G | A | NULL | 0.584190523 | NULL&M | Disease |
| 11 | 118853021 | rs113962716  | A | C | NULL | 0.584190523 | NULL&M | Disease |
| 11 | 119863584 | rs1944511    | A | G | NULL | 0.584190523 | NULL&M | Disease |
| 11 | 120475835 | rs11217924   | T | C | NULL | 0.584190523 | NULL&M | Disease |
| 11 | 120715952 | rs7123228    | G | A | NULL | 0.584190523 | NULL&M | Disease |
| 11 | 117317855 | rs117580094  | G | T | NULL | 0.584190523 | NULL&M | Disease |
| 11 | 117539715 | rs636783     | C | A | NULL | 0.584190523 | NULL&M | Disease |
| 11 | 118530068 | rs112337443  | C | T | NULL | 0.584190523 | NULL&M | Disease |
| 11 | 119628238 | rs10892449   | G | C | NULL | 0.584190523 | NULL&M | Disease |
| 11 | 117464025 | rs12576226   | G | A | NULL | 0.585404569 | NULL&M | Disease |
| 11 | 117619538 | rs7924968    | A | T | NULL | 0.584190523 | NULL&M | Disease |
| 11 | 117674072 | rs1410186916 | T | A | NULL | 0.585404569 | NULL&M | Disease |
| 11 | 117683284 | rs112776148  | C | G | NULL | 0.584190523 | NULL&M | Disease |
| 11 | 120986075 | rs80282202   | C | G | NULL | 0.584190523 | NULL&M | Disease |
| 11 | 117466755 | rs78144220   | T | G | NULL | 0.584190523 | NULL&M | Disease |
| 11 | 117665267 | rs71480357   | G | C | NULL | 0.584190523 | NULL&M | Disease |
| 11 | 119612600 | rs113816823  | G | A | NULL | 0.584190523 | NULL&M | Disease |
| 11 | 119849683 | rs76547700   | T | G | NULL | 0.585404569 | NULL&M | Disease |
| 11 | 120206746 | rs35734851   | A | G | NULL | 0.584190523 | NULL&M | Disease |
| 11 | 121049136 | rs592160     | T | C | NULL | 0.585404569 | NULL&M | Disease |
| 11 | 116549408 | rs74792494   | C | A | NULL | 0.584190523 | NULL&M | Disease |
| 11 | 117366111 | rs10892129   | G | C | NULL | 0.585404569 | NULL&M | Disease |
| 11 | 117680478 | rs74500359   | T | C | NULL | 0.585404569 | NULL&M | Disease |
| 11 | 118863116 | rs4938613    | G | A | NULL | 0.585404569 | NULL&M | Disease |
| 11 | 118863324 | rs4936456    | T | C | NULL | 0.585404569 | NULL&M | Disease |
| 11 | 119497371 | rs145924639  | T | C | NULL | 0.584190523 | NULL&M | Disease |
| 11 | 119837947 | rs61899043   | C | A | NULL | 0.584190523 | NULL&M | Disease |
| 11 | 119981694 | rs140158503  | T | C | NULL | 0.584190523 | NULL&M | Disease |
| 11 | 120622042 | rs150032046  | G | A | NULL | 0.584190523 | NULL&M | Disease |
| 11 | 116470552 | rs35820582   | C | G | NULL | 0.585404569 | NULL&M | Disease |
| 11 | 116544015 | rs74724948   | T | A | NULL | 0.584190523 | NULL&M | Disease |

|    |           |             |   |   |       |           |           |        |          |
|----|-----------|-------------|---|---|-------|-----------|-----------|--------|----------|
| 11 | 117244291 | rs76344095  | T | C | 0.957 | -7977.388 | -7978.057 | -0.669 | 1.98E-06 |
| 11 | 117244606 | rs7109766   | T | A | 0.957 | -7977.388 | -7978.057 | -0.669 | 1.98E-06 |
| 11 | 117253230 | rs78406883  | T | C | 0.957 | -7977.388 | -7978.057 | -0.669 | 1.98E-06 |
| 11 | 117335686 | rs61743159  | A | G | 0.985 | -7977.388 | -7978.058 | -0.669 | 1.98E-06 |
| 11 | 118852137 | rs4936451   | T | C | 1.047 | -7977.388 | -7978.058 | -0.669 | 1.98E-06 |
| 11 | 116309713 | rs73580459  | A | G | 1.064 | -7977.388 | -7978.058 | -0.67  | 1.98E-06 |
| 11 | 120124302 | rs59565018  | A | G | 1.057 | -7977.388 | -7978.058 | -0.67  | 1.98E-06 |
| 11 | 120779520 | rs949055    | C | T | 1.049 | -7977.388 | -7978.058 | -0.67  | 1.98E-06 |
| 11 | 117908328 | rs3016863   | A | G | 1.047 | -7977.388 | -7978.059 | -0.671 | 1.98E-06 |
| 11 | 120580623 | rs7102869   | T | C | 0.944 | -7977.388 | -7978.06  | -0.671 | 1.98E-06 |
| 11 | 117200943 | rs1242695   | T | G | 1.049 | -7977.388 | -7978.06  | -0.672 | 1.98E-06 |
| 11 | 117336093 | rs117028190 | T | C | 0.987 | -7977.388 | -7978.06  | -0.672 | 1.98E-06 |
| 11 | 118919206 | rs568922    | T | C | 1.056 | -7977.388 | -7978.06  | -0.672 | 1.98E-06 |
| 11 | 119246708 | rs675873    | C | T | 0.954 | -7977.388 | -7978.06  | -0.672 | 1.98E-06 |
| 11 | 119604844 | rs11607679  | A | C | 0.947 | -7977.388 | -7978.06  | -0.672 | 1.98E-06 |
| 11 | 120576351 | rs12281464  | T | A | 0.946 | -7977.388 | -7978.06  | -0.672 | 1.98E-06 |
| 11 | 120576489 | rs12294858  | A | G | 0.946 | -7977.388 | -7978.06  | -0.672 | 1.98E-06 |
| 11 | 120999258 | rs4936578   | G | A | 0.949 | -7977.388 | -7978.06  | -0.672 | 1.98E-06 |
| 11 | 116236775 | rs526151    | T | C | 1.047 | -7977.388 | -7978.061 | -0.673 | 1.97E-06 |
| 11 | 117530935 | rs7949670   | A | C | 0.942 | -7977.388 | -7978.062 | -0.673 | 1.97E-06 |
| 11 | 117773027 | rs117010140 | A | G | 1.023 | -7977.388 | -7978.061 | -0.673 | 1.97E-06 |
| 11 | 118852641 | rs12273687  | T | G | 1.047 | -7977.388 | -7978.062 | -0.673 | 1.97E-06 |
| 11 | 119875786 | rs1944499   | A | G | 1.051 | -7977.388 | -7978.061 | -0.673 | 1.97E-06 |
| 11 | 120603160 | rs79540430  | T | A | 0.94  | -7977.388 | -7978.063 | -0.675 | 1.97E-06 |
| 11 | 120649337 | rs117414016 | T | G | 1.055 | -7977.388 | -7978.063 | -0.675 | 1.97E-06 |
| 11 | 117330944 | rs75813208  | T | C | 0.953 | -7977.388 | -7978.065 | -0.676 | 1.97E-06 |
| 11 | 117638305 | rs61903859  | A | C | 1.062 | -7977.388 | -7978.065 | -0.676 | 1.97E-06 |
| 11 | 119944195 | rs661621    | T | A | 0.941 | -7977.388 | -7978.064 | -0.676 | 1.97E-06 |
| 11 | 120992119 | rs11218148  | A | C | 0.95  | -7977.388 | -7978.065 | -0.676 | 1.97E-06 |
| 11 | 120992859 | rs4936576   | C | G | 0.95  | -7977.388 | -7978.065 | -0.676 | 1.97E-06 |
| 11 | 116591934 | rs180372    | A | G | 0.955 | -7977.388 | -7978.065 | -0.677 | 1.97E-06 |
| 11 | 117326419 | rs118100246 | A | G | 0.991 | -7977.388 | -7978.065 | -0.677 | 1.97E-06 |
| 11 | 117328052 | rs148406383 | T | C | 0.991 | -7977.388 | -7978.065 | -0.677 | 1.97E-06 |
| 11 | 117965421 | rs45499491  | T | C | 1.059 | -7977.388 | -7978.066 | -0.677 | 1.97E-06 |
| 11 | 118889810 | rs3802884   | T | C | 0.942 | -7977.388 | -7978.066 | -0.677 | 1.97E-06 |
| 11 | 121108907 | rs1941299   | C | A | 0.949 | -7977.388 | -7978.065 | -0.677 | 1.97E-06 |
| 11 | 116466714 | rs12292959  | C | T | 0.943 | -7977.388 | -7978.066 | -0.678 |          |

|    |           |              |   |   |      |             |        |         |
|----|-----------|--------------|---|---|------|-------------|--------|---------|
| 11 | 119642855 | rs61897696   | A | G | NULL | 0.584190523 | NULL&M | Disease |
| 11 | 120904156 | rs2000527    | G | A | NULL | 0.585404569 | NULL&M | Disease |
| 11 | 116528249 | rs492257     | A | G | NULL | 0.585404569 | NULL&M | Disease |
| 11 | 116591040 | rs180375     | T | C | NULL | 0.585404569 | NULL&M | Disease |
| 11 | 117171413 | rs78751065   | T | C | NULL | 0.584190523 | NULL&M | Disease |
| 11 | 117685169 | rs11216559   | C | T | NULL | 0.585404569 | NULL&M | Disease |
| 11 | 117895854 | rs111226844  | C | T | NULL | 0.585404569 | NULL&M | Disease |
| 11 | 119499316 | rs78201038   | G | C | NULL | 0.585404569 | NULL&M | Disease |
| 11 | 119579260 | rs4245203    | C | T | NULL | 0.584190523 | NULL&M | Disease |
| 11 | 119587095 | rs12416901   | C | T | NULL | 0.584190523 | NULL&M | Disease |
| 11 | 120697844 | rs77223730   | A | G | NULL | 0.585404569 | NULL&M | Disease |
| 11 | 120697845 | rs78653140   | T | C | NULL | 0.585404569 | NULL&M | Disease |
| 11 | 117926735 | rs628269     | G | A | NULL | 0.585404569 | NULL&M | Disease |
| 11 | 120074926 | rs187236392  | G | A | NULL | 0.584190523 | NULL&M | Disease |
| 11 | 120873529 | rs11218106   | A | T | NULL | 0.585404569 | NULL&M | Disease |
| 11 | 116573120 | rs879858     | A | G | NULL | 0.584190523 | NULL&M | Disease |
| 11 | 117089628 | rs236916     | A | G | NULL | 0.585404569 | NULL&M | Disease |
| 11 | 118838020 | rs7117266    | A | G | NULL | 0.585404569 | NULL&M | Disease |
| 11 | 120580148 | rs61901381   | C | T | NULL | 0.585404569 | NULL&M | Disease |
| 11 | 117908235 | rs686047     | A | G | NULL | 0.585404569 | NULL&M | Disease |
| 11 | 116678760 | rs1729405    | C | T | NULL | 0.585404569 | NULL&M | Disease |
| 11 | 116782202 | rs117050823  | G | A | NULL | 0.585404569 | NULL&M | Disease |
| 11 | 117196901 | rs2168673    | A | C | NULL | 0.585404569 | NULL&M | Disease |
| 11 | 119607719 | rs11600193   | C | T | NULL | 0.585404569 | NULL&M | Disease |
| 11 | 120468752 | rs7105963    | T | C | NULL | 0.585404569 | NULL&M | Disease |
| 11 | 120822001 | rs11218077   | C | T | NULL | 0.585404569 | NULL&M | Disease |
| 11 | 121050748 | rs640332     | C | T | NULL | 0.585404569 | NULL&M | Disease |
| 11 | 121050913 | rs620896     | G | A | NULL | 0.585404569 | NULL&M | Disease |
| 11 | 116701850 | rs5142       | T | C | NULL | 0.585404569 | NULL&M | Disease |
| 11 | 116702123 | rs5141       | T | C | NULL | 0.585404569 | NULL&M | Disease |
| 11 | 117711232 | rs496164     | A | G | NULL | 0.586617579 | NULL&M | Disease |
| 11 | 120437187 | rs36111344   | G | A | NULL | 0.586617579 | NULL&M | Disease |
| 11 | 120437572 | rs73000621   | T | C | NULL | 0.586617579 | NULL&M | Disease |
| 11 | 120851210 | rs35176806   | G | C | NULL | 0.585404569 | NULL&M | Disease |
| 11 | 117907041 | rs650908     | C | G | NULL | 0.586617579 | NULL&M | Disease |
| 11 | 119625373 | rs79300298   | C | G | NULL | 0.586617579 | NULL&M | Disease |
| 11 | 120623361 | rs73576552   | T | C | NULL | 0.585404569 | NULL&M | Disease |
| 11 | 116821525 | rs77586292   | T | C | NULL | 0.585404569 | NULL&M | Disease |
| 11 | 117382799 | rs117604511  | C | A | NULL | 0.585404569 | NULL&M | Disease |
| 11 | 117681924 | rs1209756219 | C | T | NULL | 0.586617579 | NULL&M | Disease |
| 11 | 119577677 | rs78058743   | T | C | NULL | 0.585404569 | NULL&M | Disease |
| 11 | 120828210 | rs17124590   | T | A | NULL | 0.585404569 | NULL&M | Disease |
| 11 | 116465292 | rs10891998   | G | A | NULL | 0.586617579 | NULL&M | Disease |
| 11 | 116524832 | rs11216075   | A | G | NULL | 0.585404569 | NULL&M | Disease |
| 11 | 116620256 | rs11216129   | A | C | NULL | 0.586617579 | NULL&M | Disease |
| 11 | 120429035 | rs144018061  | A | G | NULL | 0.585404569 | NULL&M | Disease |
| 11 | 120708132 | rs11600004   | T | C | NULL | 0.586617579 | NULL&M | Disease |
| 11 | 116519181 | rs76234156   | A | C | NULL | 0.585404569 | NULL&M | Disease |
| 11 | 117617127 | rs60816279   | A | G | NULL | 0.585404569 | NULL&M | Disease |
| 11 | 120697913 | rs113067228  | C | T | NULL | 0.586617579 | NULL&M | Disease |
| 11 | 119635453 | rs7940298    | T | C | NULL | 0.586617579 | NULL&M | Disease |
| 11 | 120200571 | rs74883244   | G | A | NULL | 0.585404569 | NULL&M | Disease |
| 11 | 121030381 | rs677336     | T | A | NULL | 0.586617579 | NULL&M | Disease |
| 11 | 121031511 | rs552580     | G | A | NULL | 0.586617579 | NULL&M | Disease |
| 11 | 118031950 | rs17530451   | A | C | NULL | 0.586617579 | NULL&M | Disease |
| 11 | 118839032 | rs67389832   | A | C | NULL | 0.586617579 | NULL&M | Disease |
| 11 | 119717705 | rs73008656   | G | T | NULL | 0.585404569 | NULL&M | Disease |
| 11 | 119924214 | rs652376     | C | G | NULL | 0.586617579 | NULL&M | Disease |
| 11 | 119924436 | rs630842     | A | G | NULL | 0.586617579 | NULL&M | Disease |
| 11 | 119949927 | rs648067     | A | C | NULL | 0.586617579 | NULL&M | Disease |
| 11 | 120353153 | rs61898767   | G | A | NULL | 0.586617579 | NULL&M | Disease |
| 11 | 117092660 | rs45462696   | A | G | NULL | 0.585404569 | NULL&M | Disease |
| 11 | 116355788 | rs138697506  | G | A | NULL | 0.586617579 | NULL&M | Disease |
| 11 | 116950150 | rs11216266   | C | T | NULL | 0.586617579 | NULL&M | Disease |
| 11 | 117685824 | rs17666283   | A | G | NULL | 0.586617579 | NULL&M | Disease |
| 11 | 117686732 | rs11216562   | T | C | NULL | 0.586617579 | NULL&M | Disease |
| 11 | 119948738 | rs1287581    | T | G | NULL | 0.586617579 | NULL&M | Disease |
| 11 | 120159612 | rs79219038   | T | C | NULL | 0.585404569 | NULL&M | Disease |
| 11 | 117391522 | rs73010304   | A | G | NULL | 0.586617579 | NULL&M | Disease |
| 11 | 119898644 | rs141642186  | T | C | NULL | 0.586617579 | NULL&M | Disease |
| 11 | 117617219 | rs59810418   | C | G | NULL | 0.586617579 | NULL&M | Disease |
| 11 | 118614397 | rs10892281   | T | C | NULL | 0.587829538 | NULL&M | Disease |
| 11 | 118866126 | rs7126193    | C | T | NULL | 0.587829538 | NULL&M | Disease |
| 11 | 120696085 | rs75622430   | T | G | NULL | 0.586617579 | NULL&M | Disease |
| 11 | 120696771 | rs111932453  | C | T | NULL | 0.586617579 | NULL&M | Disease |
| 11 | 120697009 | rs79304595   | G | C | NULL | 0.586617579 | NULL&M | Disease |
| 11 | 118341785 | rs535327     | G | A | NULL | 0.586617579 | NULL&M | Disease |
| 11 | 116312961 | rs140140760  | A | G | NULL | 0.586617579 | NULL&M | Disease |
| 11 | 116530209 | rs552657     | T | C | NULL | 0.587829538 | NULL&M | Disease |
| 11 | 119435096 | rs56189546   | G | T | NULL | 0.587829538 | NULL&M | Disease |
| 11 | 121039947 | rs562281     | T | A | NULL | 0.587829538 | NULL&M | Disease |
| 11 | 118017538 | rs117181393  | C | T | NULL | 0.586617579 | NULL&M | Disease |
| 11 | 118136362 | rs74649894   | G | C | NULL | 0.586617579 | NULL&M | Disease |
| 11 | 121030195 | rs688641     | T | G | NULL | 0.587829538 | NULL&M | Disease |
| 11 | 116471492 | rs12807148   | C | T | NULL | 0.587829538 | NULL&M | Disease |
| 11 | 116943544 | rs7109649    | T | C | NULL | 0.587829538 | NULL&M | Disease |
| 11 | 116946238 | rs12274388   | T | C | NULL | 0.587829538 | NULL&M | Disease |
| 11 | 117628287 | rs7114641    | G | A | NULL | 0.587829538 | NULL&M | Disease |
| 11 | 121033105 | rs662496     | G | A | NULL | 0.587829538 | NULL&M | Disease |
| 11 | 117610854 | rs1942931    | A | G | NULL | 0.587829538 | NULL&M | Disease |
| 11 | 119381144 | rs144553689  | C | T | NULL | 0.586617579 | NULL&M | Disease |
| 11 | 119858685 | rs117114471  | A | G | NULL | 0.586617579 | NULL&M | Disease |
| 11 | 121035186 | rs584355     | A | C | NULL | 0.587829538 | NULL&M | Disease |
| 11 | 117562505 | rs11216504   | T | C | NULL | 0.587829538 | NULL&M | Disease |
| 11 | 118290459 | rs148838027  | C | G | NULL | 0.586617579 | NULL&M | Disease |
| 11 | 120139487 | rs10892558   | A | G | NULL | 0.587829538 | NULL&M | Disease |

|    |           |             |   |   |       |           |           |        |          |
|----|-----------|-------------|---|---|-------|-----------|-----------|--------|----------|
| 11 | 119642855 | rs61897696  | A | G | 1.024 | -7977.388 | -7978.081 | -0.692 | 1.94E-06 |
| 11 | 120904156 | rs2000527   | G | A | 1.052 | -7977.388 | -7978.08  | -0.692 | 1.94E-06 |
| 11 | 116528249 | rs492257    | A | G | 0.954 | -7977.388 | -7978.082 | -0.693 | 1.93E-06 |
| 11 | 116591040 | rs180375    | T | C | 0.955 | -7977.388 | -7978.082 | -0.693 | 1.93E-06 |
| 11 | 117171413 | rs78751065  | T | C | 0.994 | -7977.388 | -7978.081 | -0.693 | 1.93E-06 |
| 11 | 117685169 | rs11216559  | C | T | 0.944 | -7977.388 | -7978.081 | -0.693 | 1.93E-06 |
| 11 | 117895854 | rs111226844 | C | T | 0.944 | -7977.388 | -7978.081 | -0.693 | 1.93E-06 |
| 11 | 119499316 | rs78201038  | G | C | 1.058 | -7977.388 | -7978.081 | -0.693 | 1.93E-06 |
| 11 | 119579260 | rs4245203   | C | T | 0.949 | -7977.388 | -7978.081 | -0.693 | 1.93E-06 |
| 11 | 119587095 | rs12416901  | C | T | 0.949 | -7977.388 | -7978.081 | -0.693 | 1.93E-06 |
| 11 | 120697844 | rs77223730  | A | G | 0.941 | -7977.388 | -7978.081 | -0.693 | 1.93E-06 |
| 11 | 120697845 | rs78653140  | T | C | 0.941 | -7977.388 | -7978.081 | -0.693 | 1.93E-06 |
| 11 | 117926735 | rs628269    | G | A | 1.059 | -7977.388 | -7978.082 | -0.694 | 1.93E-06 |
| 11 | 120074926 | rs187236392 | G | A | 0.954 | -7977.388 | -7978.082 | -0.694 | 1.93E-06 |
| 11 | 120873529 | rs11218106  | A | T | 1.062 | -7977.388 | -7978.082 | -0.694 | 1.93E-06 |
| 11 | 116573120 | rs879858    | A | G | 1.026 | -7977.388 | -7978.083 | -0.695 | 1.93E-06 |
| 11 | 117089628 | rs236916    | A | G | 0.946 | -7977.388 | -7978.083 | -0.695 | 1.93E-06 |
| 11 | 118838020 | rs7117266   | A | G | 1.053 | -7977.388 | -7978.083 | -0.695 | 1.93E-06 |
| 11 | 120580148 | rs61901381  | C | T | 0.941 | -7977.388 | -7978.083 | -0.695 | 1.93E-06 |
| 11 | 117908235 | rs686047    | A | G | 1.047 | -7977.388 | -7978.084 | -0.696 | 1.93E-06 |
| 11 | 116678760 | rs1729405   | C | T | 1.047 | -7977.388 | -7978.086 | -0.697 | 1.93E-06 |
| 11 | 116782202 | rs117050823 | G | A | 0.946 | -7977.388 | -7978.085 | -0.697 | 1.93E-06 |
| 11 | 117196901 | rs2168673   | A | C | 0.942 | -7977.388 | -7978.085 | -0.697 | 1.93E-06 |
| 11 | 119607719 | rs11600193  | C | T | 0.95  | -7977.388 | -7978.086 | -0.697 | 1.93E-06 |
| 11 | 120468752 | rs7105963   | T | C | 1.048 | -7977.388 | -7978.085 | -0.697 | 1.93E-06 |
| 11 | 120822001 | rs11218077  | C | T | 0.95  | -7977.388 | -7978.086 | -0.697 | 1.93E-06 |
| 11 | 121050748 | rs640332    | C | T | 0.954 | -7977.388 | -7978.085 | -0.697 | 1.93E-06 |
| 11 | 121050913 | rs620896    | G | A | 0.954 | -7977.388 | -7978.085 | -0.697 | 1.93E-06 |
| 11 | 116701850 | rs5142      | T | C | 0.943 | -7977.388 | -7978.087 | -0.698 | 1.92E-06 |
| 11 | 116702123 | rs5141      | T | C | 0.943 | -7977.388 | -7978.086 | -0.698 | 1.92E-06 |
| 11 | 117711232 | rs496164    | A | G | 1.046 | -7977.388 | -7978.086 | -0.698 | 1.92E-06 |
| 11 | 120437187 | rs36111344  | G | A | 1.047 | -7977.388 | -7978.086 | -0.698 | 1.92E-06 |
| 11 | 120437572 | rs73000621  | T | C | 1.047 | -7977.388 | -7978.086 | -0.698 | 1.92E-06 |
| 11 | 120851210 | rs35176806  | G | C | 1.021 | -7977.388 | -7978.086 | -0.698 | 1.92E-06 |
| 11 | 117907041 | rs650908    | C | G | 1.047 | -7977.388 | -7978.088 | -0.699 | 1.92E-06 |
| 11 | 119625373 | rs79300298  | C | G | 0.944 | -7977.388 | -7978.087 | -0.699 | 1.92E-06 |
| 11 | 120623361 | rs73576552  | T | C | 0.942 | -7977.388 | -7978.087 | -0.699 | 1.92E-06 |
| 11 | 116       |             |   |   |       |           |           |        |          |

|    |           |              |   |   |      |             |        |         |
|----|-----------|--------------|---|---|------|-------------|--------|---------|
| 11 | 120468093 | rs75524659   | T | C | NULL | 0.587829538 | NULL&M | Disease |
| 11 | 116530373 | rs552787     | C | A | NULL | 0.587829538 | NULL&M | Disease |
| 11 | 117461602 | rs553637     | C | T | NULL | 0.587829538 | NULL&M | Disease |
| 11 | 119630763 | rs11217472   | C | T | NULL | 0.587829538 | NULL&M | Disease |
| 11 | 119911542 | rs1452842    | G | A | NULL | 0.587829538 | NULL&M | Disease |
| 11 | 119930569 | rs1790469    | A | G | NULL | 0.587829538 | NULL&M | Disease |
| 11 | 116486588 | rs3016346    | A | G | NULL | 0.587829538 | NULL&M | Disease |
| 11 | 118041972 | rs12294669   | G | A | NULL | 0.587829538 | NULL&M | Disease |
| 11 | 121013909 | rs588917     | T | G | NULL | 0.587829538 | NULL&M | Disease |
| 11 | 117190901 | rs117469840  | T | C | NULL | 0.587829538 | NULL&M | Disease |
| 11 | 117711562 | rs519991     | C | T | NULL | 0.587829538 | NULL&M | Disease |
| 11 | 118341921 | rs524936     | A | G | NULL | 0.587829538 | NULL&M | Disease |
| 11 | 118477226 | rs45496391   | C | A | NULL | 0.587829538 | NULL&M | Disease |
| 11 | 116899248 | rs11216240   | T | A | NULL | 0.589040434 | NULL&M | Disease |
| 11 | 116899249 | rs11216241   | C | A | NULL | 0.589040434 | NULL&M | Disease |
| 11 | 117684522 | rs12288877   | C | G | NULL | 0.587829538 | NULL&M | Disease |
| 11 | 118825069 | rs2097131    | G | A | NULL | 0.589040434 | NULL&M | Disease |
| 11 | 120730621 | rs4526780    | A | G | NULL | 0.589040434 | NULL&M | Disease |
| 11 | 116920927 | rs10892066   | T | C | NULL | 0.589040434 | NULL&M | Disease |
| 11 | 116943952 | rs1531706    | A | C | NULL | 0.589040434 | NULL&M | Disease |
| 11 | 116944348 | rs7935913    | A | G | NULL | 0.589040434 | NULL&M | Disease |
| 11 | 116944712 | rs1531707    | A | G | NULL | 0.589040434 | NULL&M | Disease |
| 11 | 117641216 | rs56112767   | G | C | NULL | 0.589040434 | NULL&M | Disease |
| 11 | 117752769 | rs77752432   | C | C | NULL | 0.587829538 | NULL&M | Disease |
| 11 | 118474283 | rs139202987  | G | A | NULL | 0.587829538 | NULL&M | Disease |
| 11 | 120808303 | rs71486349   | T | G | NULL | 0.587829538 | NULL&M | Disease |
| 11 | 116660813 | rs619054     | A | G | NULL | 0.589040434 | NULL&M | Disease |
| 11 | 117611292 | rs10466534   | A | G | NULL | 0.587829538 | NULL&M | Disease |
| 11 | 117912720 | rs650104     | T | C | NULL | 0.589040434 | NULL&M | Disease |
| 11 | 117912731 | rs689054     | T | A | NULL | 0.589040434 | NULL&M | Disease |
| 11 | 118015832 | rs45539032   | A | G | NULL | 0.587829538 | NULL&M | Disease |
| 11 | 119985011 | rs150954345  | A | G | NULL | 0.587829538 | NULL&M | Disease |
| 11 | 120619202 | rs2852224    | T | C | NULL | 0.587829538 | NULL&M | Disease |
| 11 | 117804926 | rs550388     | C | T | NULL | 0.589040434 | NULL&M | Disease |
| 11 | 119745457 | rs508440     | G | C | NULL | 0.589040434 | NULL&M | Disease |
| 11 | 117590911 | rs948772     | C | G | NULL | 0.589040434 | NULL&M | Disease |
| 11 | 120576090 | rs11217982   | A | T | NULL | 0.589040434 | NULL&M | Disease |
| 11 | 120576091 | rs11217983   | C | T | NULL | 0.589040434 | NULL&M | Disease |
| 11 | 120895352 | rs3824976    | A | G | NULL | 0.589040434 | NULL&M | Disease |
| 11 | 120984681 | rs658494     | T | C | NULL | 0.589040434 | NULL&M | Disease |
| 11 | 117461875 | rs1363950531 | G | T | NULL | 0.589040434 | NULL&M | Disease |
| 11 | 117591292 | rs4936399    | T | C | NULL | 0.589040434 | NULL&M | Disease |
| 11 | 117912538 | rs111234707  | A | G | NULL | 0.587829538 | NULL&M | Disease |
| 11 | 116928112 | rs4938329    | T | C | NULL | 0.589040434 | NULL&M | Disease |
| 11 | 117526440 | rs55728331   | A | G | NULL | 0.589040434 | NULL&M | Disease |
| 11 | 117681047 | rs34836631   | A | G | NULL | 0.589040434 | NULL&M | Disease |
| 11 | 118134785 | rs1624780    | T | G | NULL | 0.589040434 | NULL&M | Disease |
| 11 | 116944437 | rs7935834    | G | C | NULL | 0.589040434 | NULL&M | Disease |
| 11 | 116957189 | rs12274465   | T | C | NULL | 0.589040434 | NULL&M | Disease |
| 11 | 117283939 | rs11822288   | A | G | NULL | 0.589040434 | NULL&M | Disease |
| 11 | 117353003 | rs3741279    | G | A | NULL | 0.589040434 | NULL&M | Disease |
| 11 | 118460957 | rs45600633   | A | G | NULL | 0.589040434 | NULL&M | Disease |
| 11 | 118518021 | rs10736493   | G | T | NULL | 0.589040434 | NULL&M | Disease |
| 11 | 118867695 | rs4938617    | T | C | NULL | 0.589040434 | NULL&M | Disease |
| 11 | 119907974 | rs1939333    | C | T | NULL | 0.590250252 | NULL&M | Disease |
| 11 | 116364066 | rs6589549    | A | G | NULL | 0.590250252 | NULL&M | Disease |
| 11 | 116539518 | rs9681206    | T | C | NULL | 0.590250252 | NULL&M | Disease |
| 11 | 117435148 | rs7940044    | A | G | NULL | 0.590250252 | NULL&M | Disease |
| 11 | 120109766 | rs61898297   | T | C | NULL | 0.589040434 | NULL&M | Disease |
| 11 | 120423569 | rs12278730   | T | C | NULL | 0.590250252 | NULL&M | Disease |
| 11 | 117251143 | rs2305828    | A | G | NULL | 0.590250252 | NULL&M | Disease |
| 11 | 117680407 | rs67877251   | G | A | NULL | 0.589040434 | NULL&M | Disease |
| 11 | 118852647 | rs80126726   | A | G | NULL | 0.590250252 | NULL&M | Disease |
| 11 | 119499255 | rs11217361   | C | G | NULL | 0.590250252 | NULL&M | Disease |
| 11 | 119768716 | rs73010609   | T | C | NULL | 0.590250252 | NULL&M | Disease |
| 11 | 119805057 | rs145637218  | A | G | NULL | 0.589040434 | NULL&M | Disease |
| 11 | 120568566 | rs12270409   | C | T | NULL | 0.590250252 | NULL&M | Disease |
| 11 | 121004151 | rs1893023    | T | C | NULL | 0.590250252 | NULL&M | Disease |
| 11 | 116955049 | rs61903416   | C | T | NULL | 0.590250252 | NULL&M | Disease |
| 11 | 117433686 | rs755791     | C | A | NULL | 0.590250252 | NULL&M | Disease |
| 11 | 118561859 | rs10790258   | T | G | NULL | 0.589040434 | NULL&M | Disease |
| 11 | 117194929 | rs554233     | G | A | NULL | 0.590250252 | NULL&M | Disease |
| 11 | 117966178 | rs948465     | G | A | NULL | 0.590250252 | NULL&M | Disease |
| 11 | 117966185 | rs948464     | G | T | NULL | 0.590250252 | NULL&M | Disease |
| 11 | 119676471 | rs10892468   | T | G | NULL | 0.590250252 | NULL&M | Disease |
| 11 | 119820957 | rs144502429  | T | C | NULL | 0.589040434 | NULL&M | Disease |
| 11 | 116913909 | rs12279066   | G | C | NULL | 0.590250252 | NULL&M | Disease |
| 11 | 118295001 | rs139060345  | C | T | NULL | 0.589040434 | NULL&M | Disease |
| 11 | 119913037 | rs659127     | A | C | NULL | 0.590250252 | NULL&M | Disease |
| 11 | 121014403 | rs492294     | G | A | NULL | 0.590250252 | NULL&M | Disease |
| 11 | 116409130 | rs56338557   | C | T | NULL | 0.590250252 | NULL&M | Disease |
| 11 | 118559426 | rs10892253   | A | C | NULL | 0.589040434 | NULL&M | Disease |
| 11 | 118561858 | rs10790257   | C | G | NULL | 0.589040434 | NULL&M | Disease |
| 11 | 118834508 | rs111358668  | A | G | NULL | 0.590250252 | NULL&M | Disease |
| 11 | 120334126 | rs145192391  | T | C | NULL | 0.590250252 | NULL&M | Disease |
| 11 | 121057146 | rs77233977   | T | C | NULL | 0.590250252 | NULL&M | Disease |
| 11 | 116226845 | rs564046     | G | A | NULL | 0.590250252 | NULL&M | Disease |
| 11 | 116625875 | rs12421652   | T | G | NULL | 0.590250252 | NULL&M | Disease |
| 11 | 118897962 | rs74888816   | T | C | NULL | 0.590250252 | NULL&M | Disease |
| 11 | 119881864 | rs61747468   | A | G | NULL | 0.589040434 | NULL&M | Disease |
| 11 | 120575997 | rs11217980   | A | G | NULL | 0.590250252 | NULL&M | Disease |
| 11 | 120633977 | rs116324528  | T | A | NULL | 0.590250252 | NULL&M | Disease |
| 11 | 121010048 | rs71486352   | A | T | NULL | 0.589040434 | NULL&M | Disease |
| 11 | 118493319 | rs10790254   | A | G | NULL | 0.590250252 | NULL&M | Disease |
| 11 | 118557483 | rs6589673    | C | A | NULL | 0.589040434 | NULL&M | Disease |
| 11 | 120636195 | rs150586315  | A | G | NULL | 0.590250252 | NULL&M | Disease |

|    |           |             |   |   |       |           |           |        |          |
|----|-----------|-------------|---|---|-------|-----------|-----------|--------|----------|
| 11 | 120468093 | rs75524659  | T | C | 1.048 | -7977.388 | -7978.102 | -0.714 | 1.89E-06 |
| 11 | 116530373 | rs552787    | C | A | 0.955 | -7977.388 | -7978.103 | -0.715 | 1.89E-06 |
| 11 | 117461602 | rs553637    | C | T | 0.956 | -7977.388 | -7978.103 | -0.715 | 1.89E-06 |
| 11 | 119630763 | rs11217472  | C | T | 0.945 | -7977.388 | -7978.103 | -0.715 | 1.89E-06 |
| 11 | 119911542 | rs1452842   | G | A | 1.048 | -7977.388 | -7978.103 | -0.715 | 1.89E-06 |
| 11 | 119930569 | rs1790469   | A | G | 0.946 | -7977.388 | -7978.104 | -0.715 | 1.89E-06 |
| 11 | 116486588 | rs3016346   | A | G | 0.955 | -7977.388 | -7978.104 | -0.716 | 1.89E-06 |
| 11 | 118041972 | rs12294669  | G | A | 0.943 | -7977.388 | -7978.104 | -0.716 | 1.89E-06 |
| 11 | 121013909 | rs588917    | T | G | 0.955 | -7977.388 | -7978.105 | -0.716 | 1.89E-06 |
| 11 | 117190901 | rs117469840 | T | C | 0.969 | -7977.388 | -7978.105 | -0.717 | 1.89E-06 |
| 11 | 117711562 | rs519991    | C | T | 1.046 | -7977.388 | -7978.105 | -0.717 | 1.89E-06 |
| 11 | 118341921 | rs524936    | A | G | 0.945 | -7977.388 | -7978.105 | -0.717 | 1.89E-06 |
| 11 | 118477226 | rs45496391  | C | A | 0.978 | -7977.388 | -7978.106 | -0.717 | 1.89E-06 |
| 11 | 116899248 | rs11216240  | T | A | 1.05  | -7977.388 | -7978.106 | -0.718 | 1.89E-06 |
| 11 | 116899249 | rs11216241  | C | A | 1.05  | -7977.388 | -7978.106 | -0.718 | 1.89E-06 |
| 11 | 117684522 | rs12288877  | C | G | 0.945 | -7977.388 | -7978.106 | -0.718 | 1.89E-06 |
| 11 | 118825069 | rs2097131   | G | A | 0.956 | -7977.388 | -7978.106 | -0.718 | 1.89E-06 |
| 11 | 120730621 | rs4526780   | A | G | 0.948 | -7977.388 | -7978.107 | -0.718 | 1.89E-06 |
| 11 | 116920927 | rs10892066  | T | C | 1.05  | -7977.388 | -7978.107 | -0.719 | 1.88E-06 |
| 11 | 116943952 | rs1531706   | A | C | 1.05  | -7977.388 | -7978.108 | -0.719 | 1.88E-06 |
| 11 | 116944348 | rs7935913   | A | G | 1.05  | -7977.388 | -7978.108 | -0.719 | 1.88E-06 |
| 11 | 116944712 | rs1531707   | A | G | 1.05  | -7977.388 | -7978.108 | -0.719 | 1.88E-06 |
| 11 | 117641216 | rs56112767  | G | C | 1.059 | -7977.388 | -7978.109 | -0.72  | 1.88E-06 |
| 11 | 117752769 | rs77752432  | T | C | 0.996 | -7977.388 | -7978.108 | -0.72  | 1.88E-06 |
| 11 | 118474283 | rs139202987 | G | A | 0.982 | -7977.388 | -7978.108 | -0.72  | 1.88E-06 |
| 11 | 120808303 | rs71486349  | T | G | 0.988 | -7977.388 | -7978.108 | -0.72  | 1.88E-06 |
| 11 | 116660813 | rs619054    | A | G | 1.05  | -7977.388 | -7978.11  | -0.721 | 1.88E-06 |
| 11 | 117611292 | rs10466534  | A | G | 0.95  | -7977.388 | -7978.109 | -0.721 | 1.88E-06 |
| 11 | 117912720 | rs650104    | T | C | 1.046 | -7977.388 | -7978.109 | -0.721 | 1.88E-06 |
| 11 | 117912731 | rs689054    | T | A | 1.046 | -7977.388 | -7978.109 | -0.721 | 1.88E-06 |
| 11 | 118015832 | rs45539032  | A | G | 1.057 | -7977.388 | -7978.109 | -0.721 | 1.88E-06 |
| 11 | 119985011 | rs150954345 | A | G | 0.975 | -7977.388 | -7978.11  | -0.721 | 1.88E-06 |
| 11 | 120619202 | rs2852224   | T | C | 0.945 | -7977.388 | -7978.109 | -0.721 | 1.88E-06 |
| 11 | 117804926 | rs550388    | C | T | 0.944 | -7977.388 | -7978.111 | -0.722 | 1.88E-06 |
| 11 | 119745457 | rs508440    | G | C | 1.06  | -7977.388 | -7978.111 | -0.722 | 1.88E-06 |
| 11 | 117590911 | rs948772    | C | G | 0.942 | -7977.388 | -7978.111 | -0.723 | 1.88E-06 |
| 11 | 120576090 | rs11217982  | A | T | 0.947 | -7977.388 | -7978.111 | -0.723 | 1.88E-06 |
| 11 | 120576091 |             |   |   |       |           |           |        |          |



|    |           |              |   |   |      |             |        |         |
|----|-----------|--------------|---|---|------|-------------|--------|---------|
| 11 | 118066912 | rs12808254   | T | C | NULL | 0.5926666   | NULL&M | Disease |
| 11 | 119870561 | rs78289484   | T | C | NULL | 0.5926666   | NULL&M | Disease |
| 11 | 120699050 | rs76871374   | G | A | NULL | 0.5926666   | NULL&M | Disease |
| 11 | 118150882 | rs117527146  | A | C | NULL | 0.5926666   | NULL&M | Disease |
| 11 | 120800039 | rs12225735   | T | C | NULL | 0.593873103 | NULL&M | Disease |
| 11 | 116437742 | rs74954439   | A | G | NULL | 0.593873103 | NULL&M | Disease |
| 11 | 117207626 | rs520315     | C | T | NULL | 0.593873103 | NULL&M | Disease |
| 11 | 117207628 | rs620848     | G | C | NULL | 0.593873103 | NULL&M | Disease |
| 11 | 119847840 | rs78097928   | A | G | NULL | 0.5926666   | NULL&M | Disease |
| 11 | 120423601 | rs12278740   | T | C | NULL | 0.593873103 | NULL&M | Disease |
| 11 | 116963519 | rs7950093    | T | G | NULL | 0.593873103 | NULL&M | Disease |
| 11 | 117803627 | rs73024427   | T | C | NULL | 0.593873103 | NULL&M | Disease |
| 11 | 121040370 | rs510722     | A | T | NULL | 0.593873103 | NULL&M | Disease |
| 11 | 117447373 | rs648740     | A | G | NULL | 0.593873103 | NULL&M | Disease |
| 11 | 117633791 | rs73587426   | G | C | NULL | 0.593873103 | NULL&M | Disease |
| 11 | 117633827 | rs73587428   | G | A | NULL | 0.593873103 | NULL&M | Disease |
| 11 | 117633869 | rs73587429   | A | G | NULL | 0.593873103 | NULL&M | Disease |
| 11 | 117848134 | rs73009916   | T | C | NULL | 0.593873103 | NULL&M | Disease |
| 11 | 120491113 | rs1316812    | T | C | NULL | 0.593873103 | NULL&M | Disease |
| 11 | 117633297 | rs61903857   | T | G | NULL | 0.593873103 | NULL&M | Disease |
| 11 | 117633349 | rs61903858   | A | G | NULL | 0.593873103 | NULL&M | Disease |
| 11 | 119920056 | rs720314     | G | A | NULL | 0.593873103 | NULL&M | Disease |
| 11 | 119920110 | rs720313     | G | A | NULL | 0.593873103 | NULL&M | Disease |
| 11 | 119921007 | rs11217661   | T | C | NULL | 0.593873103 | NULL&M | Disease |
| 11 | 120566146 | rs61902685   | C | T | NULL | 0.593873103 | NULL&M | Disease |
| 11 | 120575671 | rs9630199    | C | T | NULL | 0.593873103 | NULL&M | Disease |
| 11 | 120780402 | rs10892639   | C | A | NULL | 0.593873103 | NULL&M | Disease |
| 11 | 116330610 | rs514112     | G | A | NULL | 0.593873103 | NULL&M | Disease |
| 11 | 116516653 | rs1240768    | C | T | NULL | 0.593873103 | NULL&M | Disease |
| 11 | 117712887 | rs473057     | G | A | NULL | 0.593873103 | NULL&M | Disease |
| 11 | 117810532 | rs56249090   | A | C | NULL | 0.593873103 | NULL&M | Disease |
| 11 | 119766043 | rs116966258  | A | G | NULL | 0.593873103 | NULL&M | Disease |
| 11 | 116669428 | rs35412484   | C | T | NULL | 0.593873103 | NULL&M | Disease |
| 11 | 117112526 | rs531184     | T | G | NULL | 0.593873103 | NULL&M | Disease |
| 11 | 119030759 | rs4148172    | G | A | NULL | 0.593873103 | NULL&M | Disease |
| 11 | 120823396 | rs584092     | T | C | NULL | 0.593873103 | NULL&M | Disease |
| 11 | 120915270 | rs138568456  | G | A | NULL | 0.593873103 | NULL&M | Disease |
| 11 | 116823062 | rs11605327   | A | G | NULL | 0.595078474 | NULL&M | Disease |
| 11 | 119844325 | rs145069523  | G | A | NULL | 0.593873103 | NULL&M | Disease |
| 11 | 120200671 | rs117207582  | T | C | NULL | 0.593873103 | NULL&M | Disease |
| 11 | 120809383 | rs602104     | C | T | NULL | 0.595078474 | NULL&M | Disease |
| 11 | 118214726 | rs7947185    | C | T | NULL | 0.595078474 | NULL&M | Disease |
| 11 | 119772803 | rs66633375   | A | T | NULL | 0.595078474 | NULL&M | Disease |
| 11 | 120583803 | rs12281614   | T | C | NULL | 0.595078474 | NULL&M | Disease |
| 11 | 117008946 | rs504068     | T | C | NULL | 0.595078474 | NULL&M | Disease |
| 11 | 117401470 | rs7927088    | G | A | NULL | 0.593873103 | NULL&M | Disease |
| 11 | 117632463 | rs61903856   | A | G | NULL | 0.593873103 | NULL&M | Disease |
| 11 | 117787277 | rs73022414   | C | T | NULL | 0.593873103 | NULL&M | Disease |
| 11 | 120999631 | rs1893707    | C | A | NULL | 0.595078474 | NULL&M | Disease |
| 11 | 116431149 | rs11600156   | G | A | NULL | 0.595078474 | NULL&M | Disease |
| 11 | 117685752 | rs113770024  | A | G | NULL | 0.593873103 | NULL&M | Disease |
| 11 | 118607694 | rs7119702    | G | A | NULL | 0.595078474 | NULL&M | Disease |
| 11 | 119946763 | rs677409     | G | T | NULL | 0.595078474 | NULL&M | Disease |
| 11 | 120423595 | rs2508655    | C | G | NULL | 0.595078474 | NULL&M | Disease |
| 11 | 117613813 | rs11826147   | C | G | NULL | 0.593873103 | NULL&M | Disease |
| 11 | 118945502 | rs72997349   | C | T | NULL | 0.593873103 | NULL&M | Disease |
| 11 | 119916341 | rs1960536    | C | A | NULL | 0.595078474 | NULL&M | Disease |
| 11 | 120860425 | rs7940751    | T | C | NULL | 0.595078474 | NULL&M | Disease |
| 11 | 117952387 | rs671160     | T | C | NULL | 0.595078474 | NULL&M | Disease |
| 11 | 120575845 | rs9630200    | A | G | NULL | 0.595078474 | NULL&M | Disease |
| 11 | 120576039 | rs11217981   | A | G | NULL | 0.595078474 | NULL&M | Disease |
| 11 | 120696251 | rs113447930  | C | T | NULL | 0.595078474 | NULL&M | Disease |
| 11 | 116714118 | rs494606     | G | T | NULL | 0.595078474 | NULL&M | Disease |
| 11 | 116729013 | rs539858     | C | T | NULL | 0.595078474 | NULL&M | Disease |
| 11 | 117291492 | rs111864243  | C | T | NULL | 0.595078474 | NULL&M | Disease |
| 11 | 118601363 | rs557990     | T | C | NULL | 0.595078474 | NULL&M | Disease |
| 11 | 118602392 | rs564892     | A | T | NULL | 0.595078474 | NULL&M | Disease |
| 11 | 118954805 | rs2855068    | T | C | NULL | 0.595078474 | NULL&M | Disease |
| 11 | 119859971 | rs117447786  | A | C | NULL | 0.593873103 | NULL&M | Disease |
[truncated: 924,143 more chars]
